# Supplementary material for: SARS-CoV-2 mRNA vaccine is re-adenylated in vivo, enhancing antigen production and immune response
Source: bioRxiv preprint, doi:10.1101/2022.12.01.518149, version 2 (2022-12-16)
Supplement: Supplementary Table 1 [file 518149_file07.xlsx]

## Sheet: Supplementary Table 1
gene ID	symbol	baseMean	log2FoldChange	lfcSE	stat	p.value	adjusted p. value	2h post-immunization			8h post-immunization			24h post-immunization		cluster
								I_2h_2_M_RNA	I_2h_4_M_RNA	I_2h_6_M_RNA	I_8h_2_M_RNA	I_8h_4_M_RNA	I_8h_6_M_RNA	I_24h_2_M_RNA	I_24h_4_M_RNA
ENSMUSG00000031762	Mt2	1620.08	-0.299293	0.222142	290.007	1.06126e-63	2.11965e-59	503.043	527.728	578.33	3308.86	3892.83	3282.37	450.693	416.778	3
ENSMUSG00000048534	Jaml	263.582	2.46749	0.369569	232.769	2.85043e-51	2.84658e-47	25.9971	17.5076	21.5456	596.225	663.985	534.444	129.285	119.669	3
ENSMUSG00000056749	Nfil3	1531.59	-1.89744	0.190688	224.422	1.85125e-49	1.2325e-45	1123.07	1340.58	1189.55	2382.99	3109.37	2437.06	306.962	363.133	3
ENSMUSG00000031765	Mt1	9959.23	-0.391473	0.255114	181.477	3.91602e-40	1.95537e-36	3600.59	3581.55	4327.27	21593.1	21373.8	19362	3507.31	2328.18	3
ENSMUSG00000021190	Lgmn	3687.34	3.47165	0.250273	177.586	2.73988e-39	1.09447e-35	842.305	796.595	803.992	2567.4	3309.15	2364.91	10413.6	8400.76	2
ENSMUSG00000043740	B430306N03Rik	581.539	4.75683	0.43834	167.66	3.91821e-37	1.30431e-33	15.5982	25.0108	36.2874	979.376	1192.82	1154.4	785.823	462.995	3
ENSMUSG00000032322	Pstpip1	390.262	3.04498	0.305319	144.131	5.03915e-32	1.43781e-28	68.8922	53.7733	66.9049	706.106	612.08	513.066	674.594	426.681	2
ENSMUSG00000024672	Ms4a7	212.113	4.34198	0.408927	143.365	7.39101e-32	1.84526e-28	36.3959	27.5119	29.4835	44.908	54.8424	21.3777	814.714	667.67	2
ENSMUSG00000026581	Sell	1775.26	3.62309	0.443465	143.106	8.41078e-32	1.86654e-28	90.9897	60.026	162.159	2866.47	4998.49	3859.57	1263.96	900.405	3
ENSMUSG00000071637	Cebpd	2802.72	-2.61194	0.221866	138.165	9.95231e-31	1.98777e-27	2968.87	3535.28	3609.46	4034.07	3545.17	3637.78	502.696	588.441	3
ENSMUSG00000027078	Ube2l6	1352.43	2.31891	0.294023	136.405	2.39933e-30	4.35653e-27	269.07	230.1	271.021	3391.99	1869.54	1963.19	1906.78	917.736	3
ENSMUSG00000024013	Fgd2	215.957	3.7617	0.32588	135.429	3.90894e-30	6.50611e-27	40.2955	41.2678	54.4311	153.834	121.437	160.333	683.984	472.073	2
ENSMUSG00000027035	Cers6	1826.09	2.64793	0.330853	133.522	1.01391e-29	1.49815e-26	282.068	212.592	395.759	2833.98	3752.79	3812.36	2037.51	1281.69	3
ENSMUSG00000071068	Treml2	344.466	4.96386	0.502951	133.452	1.05012e-29	1.49815e-26	12.9985	10.0043	22.6796	467.234	696.303	723.28	535.197	288.031	3
ENSMUSG00000051506	Wdfy4	912.569	3.57019	0.31204	131.684	2.54231e-29	3.38518e-26	162.482	112.549	198.447	992.753	1221.22	1116.99	1971.78	1524.33	2
ENSMUSG00000000204	Slfn4	20431.2	7.38385	0.578043	131.294	3.08952e-29	3.85668e-26	144.284	122.553	497.818	12702.3	49777.3	50425.6	31191.7	18588.3	3
ENSMUSG00000078763	Slfn1	1215.4	5.01646	0.441695	130.403	4.82444e-29	5.66814e-26	54.5938	40.0173	108.862	1827.85	2247.56	1624.71	2215.18	1604.39	3
ENSMUSG00000047798	Cd300lf	1476.31	3.65426	0.408621	129.688	6.89723e-29	7.65325e-26	93.5895	98.7927	181.437	2516.76	3587.28	2495.85	1699.49	1137.27	3
ENSMUSG00000045954	Cavin2	1801.9	-0.793985	0.200595	129.006	9.69775e-29	9.7139e-26	3089.75	2371.03	3558.43	847.519	543.527	834.623	1739.21	1431.07	1
ENSMUSG00000059089	Fcgr4	302.333	4.89355	0.463814	129	9.72704e-29	9.7139e-26	18.1979	20.0087	15.8757	300.979	502.396	546.914	595.868	418.428	3
ENSMUSG00000049744	Arhgap15	266.866	2.0789	0.275561	124.712	8.29946e-28	7.89358e-25	80.5909	60.026	60.101	524.564	432.863	373.22	333.686	269.874	3
ENSMUSG00000073902	Gm1966	950.671	4.57366	0.455602	123.691	1.38306e-27	1.25563e-24	48.0946	60.026	52.1631	926.824	2393.48	1693.3	1451.03	980.459	3
ENSMUSG00000040061	Plcb2	194.595	3.62433	0.341697	120.194	7.94855e-27	6.90245e-24	37.6958	25.0108	24.9476	290.469	207.618	146.972	494.751	329.296	2
ENSMUSG00000031165	Was	244.378	3.82597	0.373961	117.462	3.11532e-26	2.5926e-23	44.195	27.5119	15.8757	318.178	379.98	181.711	557.588	429.983	2
ENSMUSG00000028341	Nr4a3	1923.33	-3.85047	0.351143	115.622	7.81523e-26	6.1209e-23	5433.39	3197.63	3340.71	752.925	1031.23	1076.9	312.018	241.814	1
ENSMUSG00000044768	D1Ertd622e	1387.01	0.747875	0.228973	115.584	7.96792e-26	6.1209e-23	556.337	609.013	564.722	2907.55	2231.89	2230.41	1002.5	993.664	3
ENSMUSG00000087006	Gm13889	894.347	0.849443	0.409058	112.351	4.0121e-25	2.96791e-22	141.684	173.825	134.944	1122.7	3338.53	1686.17	284.572	272.35	3
ENSMUSG00000048865	Arhgap30	1245.04	3.97124	0.366602	111.509	6.11069e-25	4.35889e-22	131.285	147.564	200.715	1467.63	1836.24	1195.37	2967.78	2013.74	3
ENSMUSG00000025877	Hk3	860.526	4.65719	0.468217	110.274	1.1332e-24	7.80462e-22	37.6958	51.2722	87.3165	795.922	1868.56	1723.58	1429.36	890.501	3
ENSMUSG00000043939	A530064D06Rik	158.867	5.29482	0.698425	108.391	2.90551e-24	1.93439e-21	2.59971	5.00216	4.53592	192.053	406.421	381.236	166.843	112.241	3
ENSMUSG00000032661	Oas3	2287.29	6.54448	0.599939	108.304	3.03483e-24	1.95531e-21	40.2955	31.2635	54.4311	1422.72	5584.13	4433.21	4493.2	2239.05	3
ENSMUSG00000098112	Bin2	242.627	3.36158	0.366467	104.476	2.0574e-23	1.28414e-20	45.4949	27.5119	29.4835	446.213	346.682	207.542	552.532	285.555	2
ENSMUSG00000022148	Fyb	675.294	3.95771	0.372802	104.072	2.51833e-23	1.5242e-20	87.0902	75.0325	98.6563	856.118	837.326	474.764	1823.72	1149.65	2
ENSMUSG00000029561	Oasl2	4800.72	5.26285	0.526411	103.908	2.73313e-23	1.60555e-20	154.683	187.581	234.734	3124.45	11596.2	10994.4	7689.22	4424.45	3
ENSMUSG00000030187	Klra2	333.637	4.23717	0.518916	103.649	3.11104e-23	1.77533e-20	15.5982	16.257	27.2155	373.596	914.693	673.399	378.466	269.874	3
ENSMUSG00000009185	Ccl8	215.913	4.5134	0.444425	102.998	4.30778e-23	2.38998e-20	38.9956	25.0108	13.6078	85.994	142.982	81.948	710.708	628.055	2
ENSMUSG00000033777	Tlr13	1106.44	5.32258	0.489356	102.862	4.61181e-23	2.48951e-20	38.9956	45.0195	90.7185	1502.03	1802.94	989.611	2639.15	1743.04	3
ENSMUSG00000055541	Lair1	247.944	5.28545	0.508536	102.49	5.55273e-23	2.91854e-20	12.9985	20.0087	29.4835	102.237	79.3256	58.7888	1084.84	595.868	2
ENSMUSG00000052397	Ezr	785.549	2.13638	0.299824	100.313	1.64919e-22	8.44598e-20	168.981	195.084	230.198	1230.67	1631.56	1077.79	893.44	856.664	3
ENSMUSG00000057191	AB124611	285.008	3.41471	0.439485	100.008	1.92123e-22	9.59316e-20	40.2955	16.257	34.0194	543.673	578.783	398.16	408.079	260.796	3
ENSMUSG00000030671	Pde3b	2321.78	-2.45132	0.336188	98.471	4.14287e-22	2.01818e-19	4791.26	4632	4869.31	1046.26	463.222	1011.88	1169.35	590.917	1
ENSMUSG00000052085	Dock8	1350.54	2.21754	0.25049	98.0786	5.04074e-22	2.39711e-19	395.155	442.691	517.095	1566.05	2020.35	1866.99	2176.18	1819.79	3
ENSMUSG00000056069	Fam105a	303.957	4.53795	0.436472	97.5165	6.67678e-22	3.10129e-19	35.096	35.0151	32.8854	159.567	285.964	140.737	1040.06	702.333	2
ENSMUSG00000030495	Slc7a10	426.821	-2.31899	0.270037	96.7772	9.66257e-22	4.38615e-19	743.516	686.547	980.893	269.448	198.804	233.374	156.731	145.253	1
ENSMUSG00000021226	Acot2	1308.79	-2.13696	0.217157	96.5828	1.06492e-21	4.72657e-19	2159.06	1544.42	2764.65	926.824	781.504	1481.3	418.913	393.669	1
ENSMUSG00000033705	Stard9	985.33	1.545	0.197532	95.4081	1.91602e-21	8.31926e-19	759.114	619.018	703.068	695.596	486.726	595.905	2216.63	1806.59	2
ENSMUSG00000027322	Siglec1	1912.78	5.34951	0.508541	94.8059	2.58923e-21	1.07789e-18	194.978	97.5422	153.087	534.118	1506.21	1432.31	6006.35	5377.67	2
ENSMUSG00000029082	Bst1	397.051	4.62469	0.472349	94.8049	2.59044e-21	1.07789e-18	29.8966	22.5097	38.5554	435.703	736.455	373.22	890.551	649.513	3
ENSMUSG00000067786	Nnat	1648.96	-3.38749	0.335071	93.9034	4.06561e-21	1.65719e-18	3196.34	2038.38	4523.45	791.145	1059.63	1046.62	274.46	261.621	1
ENSMUSG00000026395	Ptprc	4070.72	3.48807	0.389931	93.7595	4.36903e-21	1.74525e-18	568.036	471.454	696.264	4325.5	8272.39	5826.33	7475.43	4930.36	3
ENSMUSG00000034330	Plcg2	610.558	3.61276	0.375406	93.6542	4.60512e-21	1.79249e-18	111.787	78.7841	108.862	521.697	948.969	714.373	1284.19	1115.81	2
ENSMUSG00000032690	Oas2	2137	4.78422	0.526779	93.6276	4.66676e-21	1.79249e-18	96.1892	123.804	109.996	1524.01	5168.9	4712.9	3408.36	1951.84	3
ENSMUSG00000003948	Mmd	2084.9	-1.75907	0.247865	92.9445	6.56675e-21	2.42885e-18	4140.03	3297.68	3849.87	1056.77	805.008	1442.11	1257.46	830.254	1
ENSMUSG00000052749	Trim30b	650.583	3.25433	0.510121	92.9605	6.51439e-21	2.42885e-18	40.2955	27.5119	108.862	1007.09	1703.05	1509.8	491.139	316.916	3
ENSMUSG00000109225	4930513N20Rik	319.076	-2.56957	0.257034	92.2588	9.25241e-21	3.35997e-18	610.931	420.182	504.622	303.846	256.584	284.146	99.6724	72.6266	1
ENSMUSG00000058818	Pirb	1225.8	3.85701	0.396625	92.19	9.57648e-21	3.41555e-18	163.782	122.553	181.437	1580.38	1849.95	1047.51	3166.4	1694.35	3
ENSMUSG00000028364	Tnc	1635.49	1.52395	0.303431	91.864	1.12717e-20	3.94965e-18	379.557	537.733	489.88	1841.23	2762.69	4679.05	940.387	1453.36	3
ENSMUSG00000020143	Dock2	1651.23	3.70436	0.382139	91.7217	1.2103e-20	4.16783e-18	274.269	192.583	300.505	1499.16	2626.56	1783.26	3762.99	2770.54	2
ENSMUSG00000022853	Ehhadh	839.091	-2.38634	0.365797	91.3777	1.43746e-20	4.78505e-18	1871.79	1805.78	1561.49	325.822	143.961	313.54	448.526	241.814	1
ENSMUSG00000068735	Trp53i11	361.441	0.235627	0.246536	91.4019	1.4201e-20	4.78505e-18	183.279	183.83	173.499	616.29	722.745	571.855	218.846	221.181	3
ENSMUSG00000001156	Mxd1	3947.91	1.7157	0.460879	90.9558	1.77497e-20	5.81172e-18	426.352	442.691	806.26	4953.26	11679.5	10273.8	1956.61	1044.83	3
ENSMUSG00000102662	Gm38377	193.599	2.79825	0.430445	90.5421	2.18294e-20	7.03223e-18	28.5968	18.7581	40.8233	278.047	379.98	454.277	208.012	140.301	3
ENSMUSG00000044103	Il1f9	234.504	1.23403	0.536674	90.0368	2.81035e-20	8.9097e-18	25.9971	17.5076	47.6272	541.762	689.447	421.32	78.7268	53.6447	3
ENSMUSG00000055980	Irs1	3167.54	-1.17816	0.218169	89.7717	3.20859e-20	9.87945e-18	5809.05	5188.49	4847.77	1685.48	1464.1	1611.35	2168.24	2565.87	1
ENSMUSG00000099398	Ms4a14	66.9822	6.07301	0.746537	89.7676	3.21516e-20	9.87945e-18	2.59971	3.75162	6.80389	16.2433	3.91731	12.4704	278.794	211.277	2
ENSMUSG00000032898	Fbxo21	946.771	-1.47801	0.243364	89.3152	4.03131e-20	1.21996e-17	1731.4	1635.71	1643.14	468.19	379	546.023	685.428	485.278	1
ENSMUSG00000028337	Coro2a	361.044	3.51002	0.371763	89.0114	4.69269e-20	1.39727e-17	58.4934	58.7754	53.2971	457.679	501.416	252.97	928.831	576.887	2
ENSMUSG00000024397	Aif1	252.775	6.56769	0.648058	88.9841	4.75715e-20	1.39727e-17	7.79912	5.00216	20.4117	72.6172	144.941	108.67	1071.84	590.917	2
ENSMUSG00000053101	Gpr141	462.26	4.63028	0.61125	88.6576	5.60065e-20	1.62119e-17	15.5982	10.0043	29.4835	404.172	1408.27	1121.44	415.302	293.808	3
ENSMUSG00000008153	Clstn3	287.247	-2.76974	0.553284	88.3914	6.39813e-20	1.82557e-17	583.634	874.128	582.866	12.4214	23.5039	33.8481	131.452	56.1206	1
ENSMUSG00000020363	Gfpt2	1382.52	-1.9792	0.215297	88.1316	7.28575e-20	2.04955e-17	2526.92	1973.35	2239.61	1009.95	1081.18	1100.95	590.09	538.097	1
ENSMUSG00000018796	Acsl1	20332.3	-2.09048	0.269921	87.7717	8.7221e-20	2.41953e-17	40146	33802.1	38292.3	9735.48	8809.06	15910.4	7570.77	8392.5	1
ENSMUSG00000032122	Slc37a2	572.222	4.64462	0.458553	87.7018	9.03245e-20	2.4713e-17	63.6928	50.0216	66.9049	394.617	293.799	114.015	1911.11	1683.62	2
ENSMUSG00000022488	Nckap1l	1412.44	3.97684	0.402011	87.609	9.46137e-20	2.55368e-17	157.282	152.566	231.332	1953.98	1840.16	1000.3	3399.7	2564.22	2
ENSMUSG00000026979	Psd4	531.072	2.89994	0.405659	86.7744	1.43608e-19	3.82437e-17	61.0931	90.0389	96.3884	736.682	1245.71	836.404	708.541	473.724	3
ENSMUSG00000028581	Laptm5	1774.62	3.50077	0.364816	86.2124	1.90198e-19	4.99846e-17	304.166	250.108	391.223	1872.76	2679.44	1486.64	3740.6	3472.05	2
ENSMUSG00000007682	Dio2	395.055	-2.46973	0.309022	85.6369	2.5362e-19	6.57863e-17	604.432	860.372	796.055	126.125	228.184	301.07	104.728	139.476	1
ENSMUSG00000036390	Gadd45a	835.374	-1.11296	0.298357	84.8554	3.74876e-19	9.59922e-17	630.429	472.704	461.53	1414.12	1938.09	1239.02	227.513	299.585	3
ENSMUSG00000049103	Ccr2	2265.75	5.61967	0.55188	84.4556	4.57825e-19	1.15749e-16	145.584	80.0346	154.221	916.314	3126.02	2118.18	6941.68	4643.98	2
ENSMUSG00000026068	Il18rap	452.539	1.72843	0.420977	83.767	6.45992e-19	1.6128e-16	62.393	71.2808	134.944	1059.64	960.721	790.086	319.241	222.006	3
ENSMUSG00000095788	Sirpb1a	140.284	6.27891	0.703911	83.0186	9.39148e-19	2.31575e-16	3.89956	2.50108	7.93787	107.97	181.176	133.611	432.636	252.543	2
ENSMUSG00000047810	Ccdc88b	475.307	3.10667	0.391656	82.7085	1.09665e-18	2.67114e-16	57.1936	95.0411	77.1107	837.964	741.352	571.855	891.274	530.67	2
ENSMUSG00000021948	Prkcd	1327.38	2.79925	0.3496	82.6464	1.13128e-18	2.72229e-16	309.365	223.847	292.567	1744.72	2509.04	1520.49	2361.8	1657.21	3
ENSMUSG00000006519	Cyba	769.599	3.19639	0.350734	82.5751	1.17232e-18	2.78747e-16	175.48	136.309	140.614	797.833	1227.1	558.494	1679.99	1440.98	2
ENSMUSG00000028645	Slc2a1	562.564	0.698356	0.247706	82.3587	1.30631e-18	3.06952e-16	259.971	251.359	264.218	931.602	1052.78	888.067	468.749	383.766	3
ENSMUSG00000024691	Fam111a	751.665	2.40418	0.337011	81.9969	1.56532e-18	3.63535e-16	198.878	166.322	178.035	883.827	1442.55	1243.47	1079.06	821.176	3
ENSMUSG00000072620	Slfn2	2352.65	3.3748	0.448012	81.6954	1.81997e-18	4.17818e-16	265.17	252.609	328.854	2201.45	6096.32	4239.03	3217.69	2220.06	3
ENSMUSG00000045761	Togaram2	598.973	0.00625159	0.292929	81.6229	1.88715e-18	4.28319e-16	233.974	317.637	277.825	926.824	1639.4	794.539	254.959	346.627	3
ENSMUSG00000037860	Aim2	207.375	3.91121	0.480601	80.9653	2.62183e-18	5.88379e-16	12.9985	25.0108	34.0194	236.961	378.021	366.985	358.243	246.765	3
ENSMUSG00000025780	Itih5	2951.56	-1.14144	0.179322	80.9177	2.68499e-18	5.95859e-16	4977.14	3764.13	5164.15	1986.46	1584.55	2241.1	2074.34	1820.62	1
ENSMUSG00000017009	Sdc4	4666.03	-0.689354	0.306928	80.2676	3.71624e-18	8.15654e-16	2382.63	2042.13	3421.22	6445.73	10183.1	9993.2	1592.59	1267.66	3
ENSMUSG00000078945	Naip2	323.364	3.21111	0.41024	79.8633	4.54887e-18	9.87551e-16	59.7933	42.5184	53.2971	340.154	646.357	491.688	515.696	437.41	3
ENSMUSG00000040037	Negr1	225.692	-2.88455	0.35886	79.666	5.02048e-18	1.07822e-15	440.65	431.437	462.664	126.125	78.3463	154.989	52.7253	58.5965	1
ENSMUSG00000036526	Card11	139.266	5.40718	0.606149	78.799	7.74507e-18	1.64566e-15	7.79912	16.257	4.53592	52.5519	58.7597	40.0833	625.48	308.663	2
ENSMUSG00000042228	Lyn	1940.79	2.78769	0.383243	78.68	8.21963e-18	1.72811e-15	319.764	346.4	442.253	2008.44	4523.52	3141.64	2669.49	2074.81	3
ENSMUSG00000060131	Atp8b4	535.133	3.9963	0.475325	78.4325	9.30251e-18	1.93541e-15	48.0946	37.5162	85.0486	635.4	1142.88	687.651	939.665	704.808	3
ENSMUSG00000028583	Pdpn	1410.2	1.22431	0.276003	78.094	1.10181e-17	2.26871e-15	552.438	516.473	487.612	2138.38	3161.27	1801.97	1349.19	1274.27	3
ENSMUSG00000039236	Isg20	724.685	3.64802	0.533088	78.0018	1.15377e-17	2.35146e-15	57.1936	57.5249	58.967	814.077	1714.8	1691.51	1021.28	382.115	3
ENSMUSG00000046805	Mpeg1	7014.22	5.50582	0.579408	77.566	1.43466e-17	2.89439e-15	352.26	273.868	435.449	2969.66	13791.9	9882.75	17574.1	10833.7	3
ENSMUSG00000027359	Slc27a2	346.894	-3.99686	0.506623	77.3434	1.6036e-17	3.20287e-15	557.637	594.007	1168	111.792	31.3385	241.39	46.2249	24.7591	1
ENSMUSG00000041737	Tmem45b	1412.99	-2.45087	0.306089	77.2016	1.72145e-17	3.40421e-15	2446.32	2412.29	3069.69	671.709	753.104	1067.11	568.422	315.266	1
ENSMUSG00000104291	A130071D04Rik	317.636	3.54221	0.434891	77.1091	1.80286e-17	3.53024e-15	48.0946	35.0151	52.1631	372.641	576.825	397.27	663.76	395.32	3
ENSMUSG00000031662	Snx20	317.295	3.19562	0.453551	77.0405	1.8658e-17	3.61801e-15	37.6958	35.0151	55.5651	352.575	806.967	522.864	389.3	338.374	3
ENSMUSG00000026321	Tnfrsf11a	541.242	2.64185	0.298453	76.8694	2.03246e-17	3.90331e-15	158.582	165.071	161.025	544.629	715.889	411.522	1155.62	1017.6	2
ENSMUSG00000021360	Gcnt2	816.285	0.205256	0.29346	76.7199	2.19019e-17	4.16615e-15	399.055	331.393	409.367	1338.64	1659.96	1528.51	520.03	343.326	3
ENSMUSG00000020437	Myo1g	646.853	4.12116	0.446472	76.5137	2.42808e-17	4.57509e-15	97.489	83.7862	81.6466	369.774	854.954	438.244	1957.33	1291.6	2
ENSMUSG00000002997	Prkar2b	3771.1	-2.82321	0.42058	76.0428	3.07269e-17	5.7356e-15	7401.37	9692.94	7121.4	1219.2	737.434	1735.16	1481.36	779.911	1
ENSMUSG00000040659	Efhd2	1492.27	2.9288	0.333501	75.7134	3.62286e-17	6.69994e-15	349.661	390.169	344.73	1460.94	2250.5	1136.58	3471.92	2533.68	2
ENSMUSG00000024300	Myo1f	1241.17	4.47432	0.475518	75.6126	3.81015e-17	6.9182e-15	100.089	86.2873	174.633	1538.34	1829.39	890.739	3199.63	2110.3	2
ENSMUSG00000028480	Glipr2	773.192	2.84518	0.411202	75.6194	3.79721e-17	6.9182e-15	122.186	140.061	133.81	739.549	1875.41	1361.05	1010.45	803.019	3
ENSMUSG00000018654	Ikzf1	615.277	2.9799	0.417307	75.5597	3.91216e-17	7.03942e-15	107.888	85.0368	109.996	639.222	1403.38	1031.48	871.772	673.447	3
ENSMUSG00000029860	Zyx	2063.72	0.779954	0.247637	75.4242	4.18636e-17	7.46556e-15	961.892	837.862	1094.29	3137.83	3971.18	3261	1656.15	1589.53	3
ENSMUSG00000093930	Hmgcs1	1464.32	-1.15528	0.205848	75.2574	4.55053e-17	8.04317e-15	2204.55	2263.48	2626.3	781.59	898.044	907.663	1080.51	952.399	1
ENSMUSG00000024165	Hn1l	371.814	1.85038	0.24763	74.9565	5.28932e-17	9.26698e-15	149.483	162.57	130.408	433.792	525.899	485.453	514.974	571.935	3
ENSMUSG00000038147	Cd84	783.599	4.62885	0.485711	74.2771	7.42905e-17	1.29026e-14	66.2925	47.5206	116.8	943.068	917.631	500.595	2150.9	1525.98	2
ENSMUSG00000073982	Rhog	815.905	1.69261	0.24714	74.2434	7.55533e-17	1.30089e-14	335.362	292.627	326.587	1323.35	1184.01	897.865	1120.95	1046.48	2
ENSMUSG00000063286	Gm8995	3775.76	3.10249	0.451737	74.2196	7.64591e-17	1.30523e-14	552.438	463.951	496.684	3286.88	9363.36	7736.07	4738.05	3568.61	3
ENSMUSG00000027513	Pck1	18117	-3.66299	0.445197	74.1333	7.98285e-17	1.3512e-14	40776.4	37083.5	35938.1	11619.7	2904.69	10323.7	4346.58	1943.59	1
ENSMUSG00000028931	Kcnab2	201.102	3.25198	0.372803	73.5217	1.08385e-16	1.81914e-14	51.9941	43.7689	57.833	128.991	198.804	124.704	468.749	533.971	2
ENSMUSG00000018774	Cd68	1147.12	4.61825	0.48903	73.3987	1.15258e-16	1.91837e-14	116.987	85.0368	165.561	611.513	1566.93	687.651	2954.06	2989.25	2
ENSMUSG00000031659	Adcy7	741.366	2.74134	0.315338	73.3015	1.20998e-16	1.99727e-14	249.572	250.108	240.404	437.614	811.863	456.949	1729.82	1754.59	2
ENSMUSG00000030220	Arhgdib	436.716	1.94545	0.313455	73.0976	1.33988e-16	2.17572e-14	137.784	131.307	98.6563	626.801	983.246	412.412	543.142	560.38	3
ENSMUSG00000025804	Ccr1	1161.95	3.35262	0.501991	73.1073	1.33338e-16	2.17572e-14	123.486	67.5292	183.705	1662.55	3100.55	1842.05	1400.47	915.261	3
ENSMUSG00000039936	Pik3cd	1116.65	2.14825	0.292473	73.0147	1.39654e-16	2.24944e-14	392.556	336.395	350.4	1285.13	1883.25	1412.71	1825.16	1447.58	3
ENSMUSG00000044827	Tlr1	265.554	5.99805	0.63728	72.576	1.73912e-16	2.77884e-14	10.3988	11.2549	14.7418	83.1276	199.783	56.1166	1115.18	633.832	2
ENSMUSG00000048096	Lmod1	371.686	-1.77265	0.251457	72.4886	1.81674e-16	2.85714e-14	592.733	696.551	623.689	208.297	239.936	234.264	150.231	227.784	1
ENSMUSG00000067297	Ifit1bl2	142.062	3.90136	0.715216	72.491	1.81455e-16	2.85714e-14	0	10.0043	13.6078	182.498	353.538	427.555	81.6158	67.6748	3
ENSMUSG00000108291	Gm44292	294.935	1.28053	0.520756	72.1704	2.13013e-16	3.32384e-14	38.9956	41.2678	62.3689	366.908	798.153	856.891	132.174	62.723	3
ENSMUSG00000034613	Ppm1h	419.708	2.79398	0.328079	71.8764	2.46742e-16	3.8203e-14	106.588	123.804	146.284	376.463	488.685	474.764	975.056	666.019	2
ENSMUSG00000069911	Fam196b	244.724	3.16599	0.390776	71.606	2.82456e-16	4.33961e-14	40.2955	47.5206	58.967	315.311	337.868	281.474	544.587	331.772	3
ENSMUSG00000036478	Btg1	3183.44	0.170742	0.208547	71.5519	2.90205e-16	4.42463e-14	1969.28	1759.51	2152.3	4642.72	5296.21	5402.33	2304.02	1941.11	3
ENSMUSG00000048040	Arxes2	648.81	-2.19181	0.374675	71.0394	3.74969e-16	5.67367e-14	1219.26	1270.55	1435.62	192.053	166.486	395.488	334.408	176.615	1
ENSMUSG00000059498	Fcgr3	744.448	2.14579	0.375605	70.9634	3.89484e-16	5.849e-14	170.281	128.806	213.188	1295.64	1659.96	952.2	754.766	780.736	3
ENSMUSG00000032691	Nlrp3	537.152	1.3482	0.410528	70.4745	4.9734e-16	7.41297e-14	103.988	106.296	195.045	682.219	1520.9	1097.39	303.351	288.031	3
ENSMUSG00000039208	Metrnl	666.665	2.859	0.335295	70.3217	5.36824e-16	7.94222e-14	218.375	186.331	281.227	407.038	609.142	443.588	1733.43	1454.18	2
ENSMUSG00000070390	Nlrp1b	119.244	4.20882	0.49413	70.2015	5.70087e-16	8.37232e-14	14.2984	17.5076	23.8136	70.7062	102.83	97.0906	384.244	243.464	2
ENSMUSG00000000290	Itgb2	1763.25	3.80846	0.448014	70.0523	6.14232e-16	8.95479e-14	271.669	145.063	265.352	1963.53	3237.66	1456.36	3513.81	3252.52	3
ENSMUSG00000029925	Tbxas1	345.632	3.63304	0.436165	69.7142	7.27361e-16	1.05272e-13	88.39	38.7668	56.699	277.092	407.401	442.697	799.546	654.465	2
ENSMUSG00000028385	Snx30	393.312	1.87904	0.250795	69.6493	7.51369e-16	1.07194e-13	228.774	222.596	250.61	236.006	266.377	274.348	915.108	752.676	2
ENSMUSG00000022094	Slc39a14	3096.72	0.00101947	0.37342	69.6528	7.50057e-16	1.07194e-13	955.392	1250.54	1323.36	8268.8	6429.29	3962.01	1507.36	1077.02	3
ENSMUSG00000074677	Sirpb1c	344.591	4.42112	0.559176	69.6029	7.68991e-16	1.08929e-13	42.8952	11.2549	26.0816	398.439	668.881	418.647	760.544	429.983	3
ENSMUSG00000027559	Car3	71056.1	-1.50366	0.185414	69.294	8.97433e-16	1.26228e-13	94537	113754	108841	52865.3	67601.1	56514.7	36504.7	37831	1
ENSMUSG00000079227	Ccr5	1766.87	5.70819	0.621453	68.8776	1.10517e-15	1.5436e-13	92.2896	62.527	117.934	603.869	2944.84	1959.63	5263.14	3090.76	2
ENSMUSG00000026288	Inpp5d	1090.1	2.80149	0.34423	68.6976	1.20921e-15	1.67719e-13	266.47	220.095	295.969	1670.19	1485.64	856	2119.84	1806.59	2
ENSMUSG00000036606	Plxnb2	2117.83	2.46173	0.288732	68.4758	1.35107e-15	1.86103e-13	700.621	816.603	911.721	2000.79	1917.53	1419.84	5149.74	4025.83	2
ENSMUSG00000024965	Fermt3	535.796	3.38131	0.386332	68.2969	1.47746e-15	2.02119e-13	96.1892	106.296	104.326	614.379	604.246	261.877	1428.64	1070.42	2
ENSMUSG00000054520	Sh3bp2	840.775	2.99011	0.425622	68.2606	1.50456e-15	2.04425e-13	124.786	133.808	184.839	797.833	2003.71	1339.67	1204.01	937.544	3
ENSMUSG00000022831	Hcls1	762.551	3.05084	0.408843	68.2425	1.51821e-15	2.04887e-13	157.282	101.294	148.551	1031.93	1462.14	784.741	1506.64	907.833	3
ENSMUSG00000040747	Cd53	1632.37	3.76265	0.479632	67.9726	1.73758e-15	2.32917e-13	189.779	170.074	246.074	1333.86	3718.51	2251.79	3148.35	2000.53	3
ENSMUSG00000040613	Apobec1	1515.62	4.48202	0.518442	67.9425	1.76393e-15	2.34873e-13	171.581	115.05	198.447	773.946	2427.76	1922.22	3984.73	2531.2	2
ENSMUSG00000052776	Oas1a	1107.73	5.74713	0.669143	67.7158	1.97557e-15	2.61312e-13	27.2969	53.7733	47.6272	423.282	2684.34	2224.18	2231.07	1170.28	3
ENSMUSG00000022587	Ly6e	8576.13	3.6779	0.440639	67.592	2.10171e-15	2.76168e-13	1323.25	1399.36	1597.78	5127.15	14102.3	11320.4	20476.2	13262.6	2
ENSMUSG00000030144	Clec4d	551.335	2.05121	0.45932	67.5354	2.16213e-15	2.82249e-13	70.1921	73.7819	168.963	862.807	1577.7	916.571	350.298	390.368	3
ENSMUSG00000045763	Basp1	398.668	3.26205	0.414732	67.3902	2.32492e-15	3.0153e-13	68.8922	53.7733	102.058	482.522	649.295	475.655	830.603	526.543	3
ENSMUSG00000022667	Cd200r1	201.013	3.50006	0.426675	67.1591	2.60962e-15	3.3627e-13	35.096	27.5119	49.8952	191.098	290.861	211.996	437.692	363.958	2
ENSMUSG00000053835	H2-T24	1361.23	3.67143	0.463143	67.0594	2.74303e-15	3.51195e-13	204.077	232.601	166.695	922.047	2175.09	2323.94	2931.67	1933.68	3
ENSMUSG00000030589	Rasgrp4	371.442	2.79791	0.408191	66.9969	2.83009e-15	3.60035e-13	77.9912	46.27	73.7088	900.071	525.899	326.901	597.312	423.38	2
ENSMUSG00000024590	Lmnb1	422.979	0.556858	0.238495	66.9154	2.94785e-15	3.72642e-13	204.077	247.607	212.054	698.463	734.496	608.375	298.295	380.464	3
ENSMUSG00000015568	Lpl	28891.3	-1.70711	0.216889	66.774	3.16388e-15	3.97435e-13	45376.6	40289.9	49455.2	19624.8	19835.3	31695.2	12688	12165.8	1
ENSMUSG00000048498	Cd300e	44.0159	9.4864	1.43772	66.7558	3.19278e-15	3.98558e-13	0	0	0	1.91098	7.83463	3.56296	187.789	151.03	2
ENSMUSG00000059326	Csf2ra	766.779	3.00031	0.383478	66.5294	3.57547e-15	4.43558e-13	146.883	133.808	239.27	847.519	1286.84	950.419	1475.58	1053.91	3
ENSMUSG00000052270	Fpr2	217.272	2.41354	0.536091	66.3858	3.84149e-15	4.73618e-13	25.9971	20.0087	37.4214	337.288	661.047	368.766	176.232	111.416	3
ENSMUSG00000032020	Ubash3b	303.211	2.25747	0.281381	66.0805	4.475e-15	5.48338e-13	145.584	98.7927	92.9864	341.11	332.972	251.188	582.867	580.188	2
ENSMUSG00000032280	Tle3	2133.93	-0.531406	0.232989	66.0404	4.56563e-15	5.56033e-13	1496.13	1514.4	1564.89	3298.35	3686.19	3395.5	1215.57	900.405	3
ENSMUSG00000026574	Dpt	2259.58	-0.873696	0.200197	65.9767	4.71358e-15	5.70571e-13	3647.39	2993.79	3839.66	1287.04	1168.34	1604.22	1731.27	1804.94	1
ENSMUSG00000111713	AL603745.2	104.579	3.33898	0.532687	65.8636	4.9876e-15	6.00105e-13	12.9985	11.2549	13.6078	130.902	232.101	187.946	143.008	104.813	3
ENSMUSG00000029622	Arpc1b	2794.08	1.73509	0.237014	65.7408	5.3036e-15	6.34304e-13	1234.86	1218.03	1221.3	3112.98	4128.85	3052.56	4461.42	3922.66	3
ENSMUSG00000073412	Lst1	142.666	4.84662	0.596372	65.647	5.5582e-15	6.60797e-13	14.2984	5.00216	12.4738	120.392	229.163	125.594	337.297	297.109	2
ENSMUSG00000030546	Plin1	6125.26	-2.03616	0.36649	65.6096	5.66302e-15	6.69275e-13	11603.8	12765.5	11542.8	2330.44	1682.49	3269.01	3977.51	1830.52	1
ENSMUSG00000103734	Gm37651	95.9335	2.15904	0.483206	65.3434	6.46945e-15	7.60084e-13	23.3974	13.7559	15.8757	167.211	159.631	238.718	90.283	58.5965	3
ENSMUSG00000000682	Cd52	473.717	4.44464	0.579941	65.3212	6.5416e-15	7.64067e-13	38.9956	12.5054	46.4932	701.329	1083.14	502.377	773.545	631.356	3
ENSMUSG00000064225	Paqr9	678.798	-1.90343	0.311493	65.3036	6.59922e-15	7.64508e-13	907.298	1383.1	1491.18	240.783	278.129	577.199	273.738	278.952	1
ENSMUSG00000049037	Clec4a1	545.916	5.02778	0.564229	65.2968	6.62193e-15	7.64508e-13	44.195	42.5184	72.5748	174.855	630.688	346.498	1846.11	1209.89	2
ENSMUSG00000066861	Oas1g	510.105	5.74607	0.719756	65.1758	7.03478e-15	8.07504e-13	14.2984	12.5054	20.4117	211.163	1428.84	1020.79	847.938	524.892	3
ENSMUSG00000049866	Arl4c	266.057	2.5881	0.382199	65.1567	7.10223e-15	8.10587e-13	63.6928	50.0216	56.699	378.374	554.3	256.533	372.688	396.145	3
ENSMUSG00000021614	Vcan	5065.11	2.11314	0.451538	65.034	7.55184e-15	8.57005e-13	947.593	879.13	774.509	4576.79	15183.5	10676.4	3870.61	3612.35	3
ENSMUSG00000001131	Timp1	796.118	3.63441	0.525397	64.9505	7.87355e-15	8.88466e-13	94.8893	102.544	49.8952	646.866	2086.95	1241.69	1282.02	864.092	3
ENSMUSG00000031103	Elf4	888.252	2.10556	0.291945	64.7811	8.56975e-15	9.61593e-13	353.56	255.11	316.381	1069.19	1381.83	997.628	1471.25	1261.06	3
ENSMUSG00000031722	Hp	24549	2.69578	0.470048	64.5811	9.47078e-15	1.05676e-12	2811.58	3882.93	4493.97	44882.2	39598.2	50871.9	38847.7	11003.8	3
ENSMUSG00000103747	Gm38236	120.91	3.22172	0.558496	64.4696	1.00137e-14	1.11114e-12	10.3988	10.0043	24.9476	134.724	263.439	314.431	123.507	85.8315	3
ENSMUSG00000025017	Pik3ap1	2380.27	5.29304	0.617978	64.3797	1.04742e-14	1.15581e-12	106.588	113.799	223.394	877.139	5117.97	4132.14	5286.25	3184.84	3
ENSMUSG00000023913	Pla2g7	905.744	1.64588	0.269588	64.0017	1.26536e-14	1.38863e-12	409.454	336.395	284.629	1401.7	1468.99	894.302	1491.47	959.002	2
ENSMUSG00000034652	Cd300a	577.374	3.42467	0.403219	63.8464	1.3675e-14	1.48441e-12	144.284	83.7862	210.92	553.228	410.339	342.044	1609.2	1265.19	2
ENSMUSG00000027878	Notch2	3776.82	1.41713	0.216697	63.8484	1.36611e-14	1.48441e-12	1970.58	1596.94	1969.72	5098.49	5126.79	4533.86	5561.43	4356.77	3
ENSMUSG00000023992	Trem2	57.4553	4.74933	0.657618	63.2931	1.80331e-14	1.9469e-12	5.19941	7.50325	6.80389	17.1988	15.6693	10.6889	124.229	272.35	2
ENSMUSG00000026073	Il1r2	515.681	0.270486	0.509625	62.5875	2.56618e-14	2.75561e-12	111.787	78.7841	215.456	1448.52	1237.87	734.86	160.343	137.826	3
ENSMUSG00000078771	Evi2a	340.004	3.77804	0.458472	62.5547	2.60873e-14	2.78632e-12	42.8952	68.7797	78.2447	182.498	495.54	361.64	833.492	656.941	2
ENSMUSG00000037921	Ddx60	1957.64	4.30301	0.619562	62.4465	2.75362e-14	2.92543e-12	133.885	83.7862	132.676	1122.7	4903.5	5260.71	2616.76	1407.14	3
ENSMUSG00000038725	Pkhd1l1	117.647	-1.61491	0.379829	62.4175	2.79392e-14	2.937e-12	270.37	208.84	200.715	32.4866	39.1731	37.4111	67.1705	85.0062	1
ENSMUSG00000029321	Slc10a6	419.752	-1.73874	0.372872	62.4251	2.78335e-14	2.937e-12	321.064	278.871	300.505	555.139	944.073	780.288	105.451	72.6266	3
ENSMUSG00000040552	C3ar1	1604.15	5.03126	0.575678	62.2576	3.02648e-14	3.16481e-12	142.984	110.048	183.705	401.305	1898.92	766.036	4928.01	4402.16	2
ENSMUSG00000037902	Sirpa	2537.53	2.76894	0.335597	61.7889	3.82573e-14	3.97976e-12	776.013	706.556	838.012	2368.66	2689.24	1416.28	6670.83	4834.62	2
ENSMUSG00000079293	Clec7a	916.508	2.04312	0.455877	61.7716	3.85889e-14	3.99345e-12	133.885	148.814	208.652	883.827	3203.38	1434.98	574.922	743.598	3
ENSMUSG00000026480	Ncf2	896.616	2.19569	0.390862	61.6647	4.07073e-14	4.18125e-12	235.273	142.562	243.806	1880.4	1714.8	943.293	1082.67	930.116	3
ENSMUSG00000033355	Rtp4	1255.2	4.11991	0.554582	61.6591	4.08223e-14	4.18125e-12	88.39	155.067	122.47	704.195	2886.08	2601.85	2158.12	1325.44	3
ENSMUSG00000004266	Ptpn6	929.29	4.08682	0.501212	61.5488	4.31368e-14	4.39577e-12	89.6899	70.0303	162.159	1160.92	1686.4	783.851	2018.01	1463.26	2
ENSMUSG00000051439	Cd14	769.865	0.599422	0.364536	61.2372	5.0409e-14	5.11075e-12	233.974	272.618	369.678	981.287	1911.65	1603.33	446.359	340.025	3
ENSMUSG00000043832	Clec4a3	468.895	5.47835	0.650618	61.1228	5.33766e-14	5.38429e-12	42.8952	21.2592	21.5456	124.214	537.651	301.07	1616.43	1086.1	2
ENSMUSG00000030244	Gys2	368.352	-3.50141	0.507539	60.9858	5.71615e-14	5.70843e-12	646.027	955.413	792.653	98.4154	88.1396	240.5	85.2271	40.4398	1
ENSMUSG00000020901	Pik3r5	716.59	2.61603	0.36764	60.992	5.69835e-14	5.70843e-12	184.579	171.324	193.911	691.774	1364.2	865.799	1245.18	1015.95	3
ENSMUSG00000037280	Galnt6	149.303	3.41785	0.422652	60.935	5.86304e-14	5.826e-12	32.4963	30.013	19.2777	158.611	138.085	40.0833	427.58	348.278	2
ENSMUSG00000002668	Dennd1c	363.687	2.73668	0.379393	60.7049	6.57791e-14	6.47195e-12	85.7903	65.0281	97.5224	772.991	378.021	340.262	696.985	472.898	2
ENSMUSG00000069792	Wfdc17	385.582	3.29257	0.550718	60.7113	6.55713e-14	6.47195e-12	50.6943	30.013	35.1534	385.062	1203.59	563.838	462.249	354.055	3
ENSMUSG00000072621	Slfn10-ps	398.787	4.67698	0.603716	60.6264	6.84132e-14	6.69812e-12	28.5968	23.7603	44.2253	176.765	821.657	798.102	730.209	566.983	3
ENSMUSG00000030786	Itgam	455.21	3.81577	0.492018	60.4786	7.3661e-14	7.1419e-12	51.9941	38.7668	54.4311	971.732	636.564	249.407	858.049	780.736	2
ENSMUSG00000018008	Cyth4	1184.76	3.36082	0.416564	60.4824	7.35204e-14	7.1419e-12	222.275	173.825	303.907	1249.78	1769.65	969.124	2855.83	1933.68	2
ENSMUSG00000026796	Fam129b	1709.05	1.7087	0.297169	60.3819	7.73087e-14	7.45935e-12	621.33	560.242	640.699	2111.63	3501.1	2066.52	1887.28	2283.61	3
ENSMUSG00000029915	Clec5a	151.211	2.05626	0.512047	60.0871	8.95875e-14	8.60255e-12	23.3974	20.0087	30.6175	267.537	447.553	203.089	118.451	99.0363	3
ENSMUSG00000039981	Zc3h12d	144.579	4.74331	0.589765	60.0741	9.01744e-14	8.61748e-12	10.3988	12.5054	15.8757	108.926	191.948	113.124	469.471	234.386	2
ENSMUSG00000022952	Runx1	1454.38	1.07855	0.319096	59.8605	1.00336e-13	9.54288e-12	581.035	468.953	582.866	2232.98	3345.39	1974.77	1021.28	1427.77	3
ENSMUSG00000020077	Srgn	1934.82	1.57892	0.411437	59.8401	1.01364e-13	9.59501e-12	484.845	368.91	635.029	2384.9	5306	3531.78	1493.64	1273.44	3
ENSMUSG00000003283	Hck	691.955	4.50536	0.599138	59.6476	1.11606e-13	1.05146e-11	46.7947	32.5141	81.6466	482.522	1774.54	1083.14	1248.79	785.688	3
ENSMUSG00000022102	Dok2	318.218	3.05233	0.381754	59.4854	1.21037e-13	1.13497e-11	67.5924	93.7906	92.9864	233.139	408.38	225.357	769.211	655.29	2
ENSMUSG00000023903	Mmp25	124.784	3.44042	0.697633	59.3891	1.27005e-13	1.18536e-11	2.59971	12.5054	11.3398	194.92	353.538	256.533	109.062	57.7712	3
ENSMUSG00000048078	Tenm4	1454.37	-1.86437	0.261738	59.1698	1.41724e-13	1.31658e-11	2296.84	2402.29	2512.9	1106.46	875.52	1127.68	819.769	493.531	1
ENSMUSG00000022555	Dgat1	1090.74	-1.64482	0.256266	59.1031	1.4653e-13	1.35493e-11	1718.41	1902.07	1806.43	839.875	622.853	629.753	706.374	500.133	1
ENSMUSG00000008475	Arpc5	1939.18	1.80476	0.256036	58.8142	1.69305e-13	1.55831e-11	777.312	839.113	862.959	2202.4	2903.71	1992.58	3159.9	2775.49	3
ENSMUSG00000042129	Rassf4	1225.55	2.54649	0.327762	58.5621	1.92049e-13	1.7515e-11	490.045	367.659	428.645	931.602	1416.11	1046.62	2989.45	2134.23	2
ENSMUSG00000031101	Sash3	269.879	4.65519	0.570075	58.5649	1.91775e-13	1.7515e-11	31.1965	8.75379	24.9476	366.908	342.765	131.829	776.434	476.2	2
ENSMUSG00000037095	Lrg1	3994.88	1.58802	0.354258	58.5236	1.95777e-13	1.77739e-11	1102.28	1250.54	1434.49	6795.44	6253.99	7536.55	5319.47	2266.28	3
ENSMUSG00000029192	Tbc1d14	1082.37	1.59849	0.237497	58.3904	2.09256e-13	1.89117e-11	505.643	482.709	504.622	1718.92	1108.6	1236.35	1754.38	1347.72	2
ENSMUSG00000021998	Lcp1	3274.98	3.03258	0.41216	58.3581	2.12672e-13	1.91337e-11	627.829	470.203	782.447	5363.16	5456.82	2574.24	5960.12	4965.02	2
ENSMUSG00000026858	Miga2	937.22	-1.48717	0.274784	58.1943	2.30821e-13	2.06735e-11	1494.83	1809.53	1491.18	579.026	418.173	559.384	624.036	521.591	1
ENSMUSG00000025648	Pfkfb4	1607.46	0.0941811	0.240126	58.1364	2.37591e-13	2.11419e-11	943.694	1037.95	892.443	2217.69	3488.37	2094.13	1029.95	1155.42	3
ENSMUSG00000024529	Lox	2684.38	0.924795	0.228654	58.1316	2.38168e-13	2.11419e-11	1485.73	1127.99	1663.55	3474.16	3499.14	5454	2318.47	2451.97	3
ENSMUSG00000026360	Rgs2	809.785	1.79162	0.377472	58.0674	2.45937e-13	2.1735e-11	220.975	235.102	197.313	1905.25	775.628	1603.33	926.664	614.025	3
ENSMUSG00000010307	Tmem86a	191.846	2.0846	0.354798	57.7684	2.85592e-13	2.51283e-11	101.389	125.054	111.13	101.282	60.7184	88.1832	483.194	463.82	2
ENSMUSG00000107075	Gm43068	105.931	4.40123	0.707796	57.6641	3.00891e-13	2.63583e-11	2.59971	7.50325	11.3398	97.4599	277.15	228.029	129.285	94.0845	3
ENSMUSG00000040528	Milr1	127.019	2.92728	0.491133	57.6104	3.09073e-13	2.69569e-11	25.9971	22.5097	13.6078	152.878	270.295	195.963	186.344	148.554	3
ENSMUSG00000103233	Gm37159	177.515	3.01477	0.535969	57.4476	3.35279e-13	2.91153e-11	15.5982	27.5119	34.0194	185.365	365.29	464.966	210.179	117.193	3
ENSMUSG00000022014	Epsti1	569.297	5.30681	0.707265	57.3574	3.50753e-13	3.03273e-11	22.0975	37.5162	14.7418	225.495	1466.05	1054.64	1053.78	680.049	3
ENSMUSG00000001750	Tcirg1	1469.29	3.48336	0.494239	57.2136	3.76906e-13	3.2448e-11	207.977	263.864	191.643	910.581	2871.39	2761.29	2660.1	1887.47	3
ENSMUSG00000062329	Cytl1	98.5282	-2.3699	0.379243	56.9678	4.2619e-13	3.65334e-11	172.881	147.564	248.342	42.0415	39.1731	78.3851	31.7796	28.0603	1
ENSMUSG00000021091	Serpina3n	4330.4	2.37518	0.471251	56.9016	4.40529e-13	3.76013e-11	471.847	707.806	1173.67	11283.4	7041.37	6098.89	5048.62	2817.58	3
ENSMUSG00000074785	Plxnc1	295.221	2.16105	0.287971	56.7676	4.71049e-13	4.00352e-11	113.087	120.052	125.872	261.804	380.959	272.566	522.919	564.507	2
ENSMUSG00000069793	Slfn9	1276	4.55754	0.661699	56.5949	5.13551e-13	4.34625e-11	70.1921	76.283	56.699	540.807	3244.52	3390.15	1682.15	1147.17	3
ENSMUSG00000017830	Dhx58	879.54	5.04762	0.677135	56.4639	5.48307e-13	4.62081e-11	38.9956	56.2743	44.2253	323.911	2150.61	1891.04	1601.98	929.291	3
ENSMUSG00000059456	Ptk2b	896.012	1.81029	0.329791	56.4303	5.57595e-13	4.67935e-11	326.263	216.344	400.295	1300.42	1480.74	1377.97	1282.02	784.037	3
ENSMUSG00000054434	Tmem120b	531.516	-1.53622	0.27819	56.2457	6.11522e-13	5.11043e-11	905.998	905.392	913.989	281.869	299.675	322.448	378.466	244.29	1
ENSMUSG00000058715	Fcer1g	943.728	4.0987	0.518066	56.1794	6.32107e-13	5.26045e-11	106.588	78.7841	189.375	710.884	1749.08	937.948	2182.68	1594.48	2
ENSMUSG00000058624	Gda	3309.85	1.47702	0.277102	56.0686	6.68139e-13	5.53724e-11	1416.84	1195.52	1534.28	4852.93	5480.32	4180.24	4612.38	3206.3	3
ENSMUSG00000026600	Soat1	1108.29	2.61713	0.359023	56.0292	6.81405e-13	5.62384e-11	306.765	263.864	360.606	1090.21	1906.75	1068.89	1999.95	1869.31	3
ENSMUSG00000034116	Vav1	756.308	4.07206	0.537941	55.774	7.74164e-13	6.36311e-11	85.7903	47.5206	132.676	765.347	1478.79	813.245	1721.88	1005.22	3
ENSMUSG00000061878	Sphk1	334.818	-0.64505	0.478742	55.5611	8.61134e-13	7.04894e-11	93.5895	118.801	174.633	345.887	1071.39	734.86	75.8377	63.5483	3
ENSMUSG00000003477	Inmt	298.415	-2.01168	0.403546	55.5019	8.86991e-13	7.23096e-11	779.912	395.171	598.742	177.721	50.9251	121.141	141.564	122.145	1
ENSMUSG00000009772	Nuak2	266.759	1.87689	0.317933	55.3845	9.40597e-13	7.60589e-11	92.2896	73.7819	123.604	454.813	352.558	366.094	364.743	306.187	2
ENSMUSG00000031264	Btk	201.138	3.70538	0.489398	55.3919	9.37157e-13	7.60589e-11	23.3974	25.0108	43.0913	267.537	280.088	166.568	477.416	325.995	2
ENSMUSG00000029468	P2rx7	296.123	2.59614	0.347182	55.3134	9.74669e-13	7.84962e-11	115.687	95.0411	113.398	241.739	216.432	168.35	939.665	478.676	2
ENSMUSG00000060063	Alox5ap	375.001	3.64785	0.492273	55.2691	9.96495e-13	7.99317e-11	53.294	33.7646	47.6272	811.21	493.582	193.29	725.153	642.085	2
ENSMUSG00000030830	Itgal	656.873	1.97903	0.447953	55.2327	1.01476e-12	8.1071e-11	123.486	111.298	190.509	1217.29	1703.05	769.599	607.424	532.32	3
ENSMUSG00000024803	Ankrd1	4733.89	1.89784	0.540924	55.2203	1.0211e-12	8.12527e-11	805.909	502.717	573.794	14267.4	12212.2	3241.4	1929.89	4337.79	3
ENSMUSG00000062007	Hsh2d	99.5968	4.05431	0.74573	55.2026	1.03017e-12	8.16495e-11	3.89956	2.50108	11.3398	163.389	286.943	153.207	88.8384	86.6568	3
ENSMUSG00000021457	Syk	1457.48	2.74117	0.3876	55.186	1.03875e-12	8.20036e-11	345.761	251.359	432.047	2619.95	2014.48	1229.22	2660.82	2106.17	2
ENSMUSG00000049775	Tmsb4x	6104.81	1.65193	0.233673	55.1633	1.05063e-12	8.26147e-11	2794.69	2951.28	2992.58	6925.38	8428.1	5563.56	9675.45	9507.49	2
ENSMUSG00000040345	Arhgap9	350.611	3.55822	0.479056	55.0388	1.11811e-12	8.75762e-11	49.3944	37.5162	48.7612	774.902	399.566	185.274	771.378	538.097	2
ENSMUSG00000030199	Etv6	1240.21	0.944004	0.305303	54.898	1.19967e-12	9.35974e-11	503.043	611.514	481.942	1680.71	2457.14	2127.98	1190.29	869.044	3
ENSMUSG00000021728	Emb	461.66	2.22911	0.438045	54.7964	1.26216e-12	9.80901e-11	103.988	68.7797	121.336	885.738	1035.15	502.377	552.532	423.38	3
ENSMUSG00000030536	Iqgap1	6128.41	1.71865	0.246141	54.7662	1.28135e-12	9.91957e-11	2780.39	2701.17	2932.47	7137.5	8462.38	5816.53	10312.5	8884.38	2
ENSMUSG00000004730	Adgre1	922.171	3.81517	0.501749	54.7362	1.3007e-12	9.99231e-11	215.776	130.056	193.911	291.424	764.856	304.633	3025.56	2451.15	2
ENSMUSG00000028874	Fgr	847.588	3.32949	0.508189	54.7361	1.30076e-12	9.99231e-11	135.185	62.527	161.025	1164.74	1911.65	989.611	1425.03	930.941	3
ENSMUSG00000022514	Il1rap	424.27	1.1483	0.386779	54.7206	1.31092e-12	1.00318e-10	96.1892	122.553	216.59	433.792	1091.95	915.68	243.403	274	3
ENSMUSG00000034708	Grn	4648.98	2.80361	0.373393	54.6437	1.36226e-12	1.03849e-10	1552.03	1539.42	1689.63	2250.18	4928.96	4300.49	12005.5	8925.65	2
ENSMUSG00000036469	March1	262.983	3.11461	0.450317	54.6182	1.3798e-12	1.04786e-10	54.5938	35.0151	65.7709	308.623	449.512	312.649	546.754	330.946	3
ENSMUSG00000028634	Hivep3	498.968	0.428253	0.283639	54.5858	1.40231e-12	1.06092e-10	239.173	315.136	212.054	684.13	1038.09	793.649	366.188	343.326	3
ENSMUSG00000037731	Themis2	1453.53	4.12856	0.595802	54.3497	1.578e-12	1.18934e-10	172.881	85.0368	139.48	898.16	3216.12	2748.82	2821.16	1546.62	3
ENSMUSG00000057596	Trim30d	992.338	4.49813	0.660007	54.1167	1.773e-12	1.33128e-10	57.1936	50.0216	83.9146	446.213	2562.9	2459.33	1495.09	784.037	3
ENSMUSG00000026177	Slc11a1	493.875	3.41034	0.434211	54.0179	1.86277e-12	1.39345e-10	80.5909	111.298	149.685	494.943	391.731	246.735	1237.24	1238.78	2
ENSMUSG00000043122	A530016L24Rik	283.196	-2.09894	0.436234	53.9487	1.92836e-12	1.43713e-10	601.832	639.026	428.645	135.679	59.739	84.6202	231.847	84.1809	1
ENSMUSG00000085109	Gm15356	50.7205	5.20302	0.888986	53.9356	1.94099e-12	1.44117e-10	3.89956	2.50108	0	82.1721	79.3256	66.8054	96.7834	74.2772	3
ENSMUSG00000022769	Sdf2l1	273.937	2.38126	0.335078	53.8269	2.04941e-12	1.51603e-10	80.5909	91.2895	102.058	245.561	438.739	283.255	450.693	499.308	2
ENSMUSG00000036053	Fmnl2	1157.63	0.323247	0.266232	53.7801	2.09797e-12	1.54054e-10	591.433	701.553	620.288	1508.72	1980.2	2340.86	802.435	715.537	3
ENSMUSG00000079419	Ms4a6c	762.47	5.55045	0.69477	53.7873	2.09045e-12	1.54054e-10	32.4963	43.7689	56.699	184.409	1557.13	1057.31	1946.5	1221.45	3
ENSMUSG00000008090	Fgfrl1	780.395	-0.986492	0.21048	53.5172	2.39272e-12	1.75054e-10	1230.96	1011.69	1367.58	469.145	414.256	652.912	597.312	499.308	1
ENSMUSG00000035208	Slfn8	1944.22	4.42547	0.671716	53.4742	2.44475e-12	1.78208e-10	102.688	111.298	117.934	789.234	5416.67	5044.26	2548.87	1422.82	3
ENSMUSG00000030263	Lrmp	194.441	2.46279	0.335807	53.4273	2.50266e-12	1.81766e-10	76.6914	60.026	49.8952	217.852	230.142	116.687	460.082	344.151	2
ENSMUSG00000029553	Tfec	102.708	4.06022	0.730286	53.329	2.62875e-12	1.90232e-10	5.19941	5.00216	10.2058	80.2611	301.633	241.39	100.395	77.5784	3
ENSMUSG00000003812	Dnase2a	290.405	2.3491	0.340017	53.2548	2.7282e-12	1.96716e-10	118.287	120.052	167.829	229.317	172.362	153.207	725.875	636.308	2
ENSMUSG00000064147	Rab44	249.91	-1.01325	0.589561	53.2104	2.78943e-12	2.00408e-10	66.2925	48.7711	109.996	1029.06	392.711	274.348	48.3917	29.7109	3
ENSMUSG00000027951	Adar	1758.45	3.15482	0.502166	53.1388	2.89102e-12	2.06223e-10	257.371	271.367	312.979	1183.85	3852.68	3844.43	2691.88	1653.08	3
ENSMUSG00000035923	Myf6	2765.77	-1.0141	0.296759	53.1455	2.88143e-12	2.06223e-10	2338.44	1817.04	2027.56	3847.75	6048.33	3887.19	971.445	1188.44	3
ENSMUSG00000029366	Dck	717.557	3.52982	0.525169	53.0478	3.02557e-12	2.15053e-10	100.089	111.298	86.1825	422.326	1651.15	1173.99	1237.24	958.176	3
ENSMUSG00000024663	Rab3il1	470.837	1.93377	0.286699	52.9485	3.17963e-12	2.25201e-10	302.866	218.845	233.6	472.967	236.998	236.937	1154.18	910.309	2
ENSMUSG00000029167	Ppargc1a	1986.11	-2.44945	0.478254	52.9303	3.20875e-12	2.25663e-10	5671.26	3298.93	3584.51	330.599	584.659	1006.54	645.704	766.706	1
ENSMUSG00000029816	Gpnmb	1185.53	3.61879	0.50843	52.9351	3.20109e-12	2.25663e-10	291.167	258.862	335.658	207.341	925.466	570.073	3382.36	3513.31	2
ENSMUSG00000028525	Pde4b	5043.96	-1.38479	0.296659	52.8651	3.31503e-12	2.3232e-10	5057.73	4600.74	3147.93	6104.62	10377.9	7508.93	1544.2	2009.61	3
ENSMUSG00000030117	Gdf3	28.6986	7.66846	1.32616	52.7768	3.46474e-12	2.41962e-10	0	0	2.26796	3.82196	7.83463	8.90739	106.895	99.8616	2
ENSMUSG00000102975	Gm37347	215.144	0.516538	0.600776	52.7482	3.5146e-12	2.44589e-10	38.9956	25.0108	75.9767	611.513	508.272	340.262	41.8913	79.229	3
ENSMUSG00000030745	Il21r	39.902	6.89054	1.23606	52.6709	3.65315e-12	2.53349e-10	2.59971	0	0	37.2641	38.1938	42.7555	119.174	79.229	2
ENSMUSG00000026832	Cytip	543.134	1.83758	0.439422	52.5967	3.79108e-12	2.62005e-10	84.4905	155.067	136.078	1398.84	923.507	660.038	566.977	420.079	3
ENSMUSG00000020100	Slc29a3	744.552	3.00657	0.418951	52.5205	3.9383e-12	2.7124e-10	172.881	232.601	147.418	457.679	1185.97	817.699	1631.59	1310.58	2
ENSMUSG00000027187	Cat	5797.87	-1.33253	0.19005	52.4199	4.14148e-12	2.84253e-10	8254.07	7740.85	9044.63	5093.71	4162.15	5867.3	3095.62	3124.6	1
ENSMUSG00000027639	Samhd1	8001.28	3.31942	0.549163	52.3573	4.27327e-12	2.91898e-10	985.289	959.165	1077.28	5203.59	18043.2	20123.6	11734.6	5883.58	3
ENSMUSG00000002249	Tead3	447.892	-0.572708	0.224284	52.3532	4.28209e-12	2.91898e-10	367.859	372.661	322.051	730.949	670.84	622.627	241.958	254.193	3
ENSMUSG00000004040	Stat3	5692.84	0.114668	0.242247	52.3092	4.37723e-12	2.97369e-10	3495.31	3600.31	3476.79	7577.03	10407.3	9414.22	4127.74	3443.99	3
ENSMUSG00000019122	Ccl9	1884.93	2.95304	0.392799	52.1231	4.8042e-12	3.25269e-10	492.644	330.143	599.876	2366.75	2433.63	1379.76	3602.65	3873.97	2
ENSMUSG00000059182	Skap2	1213	1.64202	0.27013	52.0943	4.87383e-12	3.28868e-10	523.841	584.003	460.396	1464.76	1834.28	1386.88	2001.39	1448.41	3
ENSMUSG00000025044	Msr1	1210.97	4.47595	0.62242	51.8998	5.37159e-12	3.61235e-10	110.488	61.2765	117.934	615.335	3015.35	1710.22	2325.69	1731.48	3
ENSMUSG00000047407	Tgif1	735.869	0.485891	0.280989	51.7185	5.88138e-12	3.94191e-10	395.155	331.393	417.305	1122.7	1477.81	1059.09	527.253	556.254	3
ENSMUSG00000002325	Irf9	1190.14	2.02511	0.363558	51.6691	6.02821e-12	4.0268e-10	388.656	401.424	317.515	1223.98	2256.37	1911.53	1757.27	1264.36	3
ENSMUSG00000064043	Trerf1	212.264	1.75682	0.276951	51.6426	6.10868e-12	4.06696e-10	146.883	115.05	122.47	169.122	123.395	119.359	487.528	414.302	2
ENSMUSG00000036908	Unc93b1	1307.07	2.98712	0.414153	51.5262	6.47482e-12	4.2964e-10	384.757	242.605	381.018	943.068	1918.5	1461.7	2946.11	2178.8	2
ENSMUSG00000022489	Pde1b	273.785	2.04357	0.351365	51.2629	7.38576e-12	4.88463e-10	75.3915	87.5379	97.5224	495.899	327.096	369.657	467.305	269.874	2
ENSMUSG00000066800	Rnasel	641.355	1.16075	0.316493	51.2423	7.46246e-12	4.91907e-10	301.566	240.104	254.012	944.979	1064.53	1122.33	774.989	428.332	3
ENSMUSG00000054598	9130230L23Rik	58.8824	0.81786	0.526661	51.1753	7.71647e-12	5.06977e-10	20.7977	12.5054	12.4738	190.142	90.0982	85.511	33.9464	25.5844	3
ENSMUSG00000026822	Lcn2	2006.47	2.67236	0.570973	51.0214	8.33393e-12	5.4575e-10	135.185	322.64	198.447	6055.89	3644.08	1899.06	2822.61	973.857	3
ENSMUSG00000039934	Gsap	585.388	1.79932	0.391582	51.004	8.40651e-12	5.48703e-10	162.482	178.827	174.633	610.558	1339.72	1071.56	649.315	496.007	3
ENSMUSG00000033174	Mgll	4360.27	-1.83226	0.280699	50.9671	8.56329e-12	5.57116e-10	7032.21	7409.45	7076.04	2898	2416	4258.62	2184.13	1607.69	1
ENSMUSG00000010064	Slc38a3	1264.34	-1.51881	0.305123	50.7151	9.71304e-12	6.29866e-10	1786	1880.81	2993.71	355.442	674.757	1207.84	534.475	681.7	1
ENSMUSG00000022383	Ppara	798.371	-2.59411	0.50419	50.6795	9.88739e-12	6.39096e-10	1437.64	1983.36	1631.8	112.748	214.473	549.586	253.515	203.85	1
ENSMUSG00000039853	Trim14	232.853	4.45165	0.622795	50.5616	1.04878e-11	6.75719e-10	7.79912	27.5119	48.7612	142.368	457.346	472.092	424.691	282.253	3
ENSMUSG00000025647	Shisa5	2998.07	2.63314	0.41264	50.5463	1.05684e-11	6.78725e-10	821.507	705.305	746.159	2399.23	5593.93	4568.6	5399.64	3750.17	3
ENSMUSG00000048355	Arxes1	175.752	-2.26255	0.471824	50.3297	1.17773e-11	7.53937e-10	387.356	302.631	401.429	41.086	56.8011	69.4777	107.617	39.6145	1
ENSMUSG00000027221	Chst1	353.049	-1.5168	0.373098	50.2107	1.24993e-11	7.97483e-10	659.026	656.534	588.536	224.54	105.767	86.4017	270.849	232.735	1
ENSMUSG00000053158	Fes	679.588	2.34202	0.363696	50.1982	1.25773e-11	7.97483e-10	193.678	161.32	221.126	1238.31	940.155	572.745	1163.57	945.797	2
ENSMUSG00000032359	Ctsh	814.538	2.52009	0.344421	50.2034	1.25448e-11	7.97483e-10	322.364	236.352	358.338	718.528	768.773	476.546	2071.45	1563.95	2
ENSMUSG00000002897	Il17ra	1132.51	-0.0643267	0.260576	50.1837	1.26692e-11	8.00766e-10	708.42	727.815	667.915	2375.35	1759.85	1363.72	726.597	730.393	3
ENSMUSG00000020399	Havcr2	93.2684	3.46426	0.551517	50.0779	1.33574e-11	8.40955e-10	10.3988	15.0065	9.07185	96.5044	246.791	66.8054	142.286	159.283	3
ENSMUSG00000022218	Tgm1	76.7756	0.786239	0.515145	50.0731	1.33893e-11	8.40955e-10	12.9985	26.2614	27.2155	135.679	183.134	158.552	39.0022	31.3615	3
ENSMUSG00000056144	Trim34a	362.824	3.0599	0.515229	50.0421	1.35986e-11	8.51425e-10	48.0946	58.7754	79.3787	248.427	696.303	969.124	495.473	307.013	3
ENSMUSG00000024210	Ip6k3	1705.06	-0.982802	0.255146	49.7718	1.55669e-11	9.71615e-10	1269.96	1473.14	1590.98	2206.22	3342.45	2241.99	574.922	940.845	3
ENSMUSG00000097415	AU020206	554.224	2.30055	0.389504	49.7369	1.58409e-11	9.8564e-10	157.282	165.071	159.891	521.697	936.238	1005.64	891.274	596.694	3
ENSMUSG00000052384	Nrros	1128.38	3.47245	0.482437	49.6197	1.67967e-11	1.04186e-09	231.374	153.817	248.342	726.172	1948.86	1144.6	2643.49	1930.38	2
ENSMUSG00000002111	Spi1	711.992	3.53375	0.507448	49.5497	1.73949e-11	1.07563e-09	114.387	58.7754	163.293	838.919	1360.29	719.717	1393.25	1047.31	3
ENSMUSG00000049625	Tifab	352.428	5.05417	0.692293	49.5316	1.7553e-11	1.08206e-09	20.7977	28.7624	22.6796	103.193	780.525	477.436	801.713	584.314	3
ENSMUSG00000002699	Lcp2	687.94	2.88944	0.462397	49.4938	1.78879e-11	1.09931e-09	146.883	110.048	164.427	603.869	1498.37	982.485	1172.96	824.477	3
ENSMUSG00000071715	Ncf4	375.302	3.60915	0.54921	49.4494	1.82892e-11	1.12052e-09	58.4934	18.7581	66.9049	685.086	674.757	363.422	600.201	534.796	2
ENSMUSG00000030579	Tyrobp	974.039	3.58283	0.523315	49.3521	1.92013e-11	1.17281e-09	94.8893	95.0411	212.054	1469.54	2049.73	852.438	1622.2	1396.41	3
ENSMUSG00000028551	Cdkn2c	361.407	-0.743255	0.314452	49.3421	1.92978e-11	1.17511e-09	556.337	571.497	604.412	185.365	111.643	155.879	453.582	252.543	1
ENSMUSG00000042759	Apobr	302.771	2.3636	0.39164	49.2882	1.9825e-11	1.20354e-09	68.8922	81.2852	86.1825	522.653	475.954	289.49	551.087	346.627	2
ENSMUSG00000040283	Btnl9	430.158	-1.67509	0.354292	49.2728	1.99778e-11	1.20914e-09	812.408	715.309	813.064	291.424	108.705	220.903	278.072	201.374	1
ENSMUSG00000025743	Sdc3	2860.78	3.82957	0.523077	49.0712	2.20963e-11	1.33332e-09	557.637	463.951	574.928	891.471	3634.29	2689.14	7942.01	6132.82	2
ENSMUSG00000003665	Has1	373.442	-3.04082	0.414126	48.9681	2.32651e-11	1.39962e-09	649.927	676.543	603.278	144.279	416.215	337.59	60.6702	99.0363	1
ENSMUSG00000069830	Nlrp1a	55.2194	4.49745	0.717776	48.8133	2.5138e-11	1.50775e-09	3.89956	5.00216	4.53592	61.1513	89.1189	73.0406	130.73	74.2772	3
ENSMUSG00000007655	Cav1	6228.17	-0.712321	0.166517	48.761	2.58042e-11	1.53475e-09	8508.84	7875.91	9872.44	4497.49	4091.64	4894.61	5090.52	4993.91	1
ENSMUSG00000026737	Pip4k2a	524.542	1.64607	0.24803	48.7598	2.58187e-11	1.53475e-09	240.473	271.367	244.94	674.575	599.349	499.705	904.997	760.929	2
ENSMUSG00000032562	Gnai2	3203.94	1.30973	0.200667	48.762	2.57905e-11	1.53475e-09	1900.39	1735.75	1815.5	3745.52	3971.18	3115.81	4824.72	4522.66	2
ENSMUSG00000026656	Fcgr2b	680.633	2.55614	0.376417	48.7156	2.63957e-11	1.5644e-09	200.177	175.076	221.126	645.911	1156.59	648.458	1328.97	1068.77	3
ENSMUSG00000041936	Agrn	1392.66	1.24609	0.231727	48.6872	2.67733e-11	1.58208e-09	688.922	797.845	690.594	1975	1600.22	1946.27	1809.99	1632.45	2
ENSMUSG00000015968	Cacna1d	222.172	2.85311	0.480655	48.6571	2.71798e-11	1.60136e-09	24.6972	48.7711	57.833	368.819	361.372	310.868	381.355	223.657	2
ENSMUSG00000030747	Dgat2	3933.32	-2.14925	0.372424	48.6128	2.7788e-11	1.62952e-09	6397.88	9756.72	5818.46	1629.11	1959.64	2722.1	1820.1	1362.57	1
ENSMUSG00000024990	Rbp4	752.713	-2.22488	0.342574	48.6105	2.78209e-11	1.62952e-09	885.2	935.405	2421.05	455.768	329.054	548.695	271.571	174.964	1
ENSMUSG00000022951	Rcan1	3180.9	-0.687359	0.352295	48.5499	2.86768e-11	1.67474e-09	2116.16	1621.95	1927.77	4863.44	7780.77	4527.63	909.33	1700.12	3
ENSMUSG00000007041	Clic1	1004.74	2.25407	0.332673	48.524	2.90503e-11	1.69161e-09	326.263	330.143	381.018	1125.57	1544.4	871.143	1940	1519.38	2
ENSMUSG00000052688	Rab7b	536.197	2.79459	0.409649	48.4501	3.01441e-11	1.7502e-09	235.273	121.302	208.652	357.353	367.248	187.055	1549.98	1262.71	2
ENSMUSG00000071713	Csf2rb	1947.51	0.930279	0.445283	48.4442	3.02326e-11	1.75025e-09	588.834	572.748	547.713	1989.33	5696.75	4066.22	1227.13	891.327	3
ENSMUSG00000029304	Spp1	1957.02	3.58985	0.481714	48.3584	3.15582e-11	1.82171e-09	123.486	1081.72	219.992	746.237	3649.96	940.621	3287.02	5607.11	2
ENSMUSG00000064105	Cnnm2	449.313	-1.56618	0.234467	48.071	3.64338e-11	2.0971e-09	727.918	591.506	724.614	414.682	340.806	332.246	256.404	206.326	1
ENSMUSG00000091549	Gm6548	309.009	2.82025	0.511854	48.0598	3.66391e-11	2.10285e-09	44.195	66.2787	53.2971	209.252	669.861	776.725	349.576	302.886	3
ENSMUSG00000044167	Foxo1	2053.56	-1.83294	0.251727	47.9856	3.80236e-11	2.17606e-09	2460.62	2936.27	3620.8	2158.45	1668.78	2002.38	781.489	799.718	1
ENSMUSG00000030278	Cidec	6957.84	-2.26334	0.317497	47.9633	3.8451e-11	2.19423e-09	11185.2	10106.9	12151.7	8243.96	3254.31	5873.54	3268.24	1578.8	1
ENSMUSG00000025006	Sorbs1	6160.85	-1.63025	0.241652	47.9401	3.8899e-11	2.21347e-09	9773.6	7897.17	10429.2	4629.34	3947.67	7261.31	2593.65	2754.86	1
ENSMUSG00000052102	Gnpda1	518.222	1.69637	0.276561	47.9095	3.94983e-11	2.24119e-09	296.367	357.655	269.887	388.884	364.31	234.264	1253.13	981.285	2
ENSMUSG00000021125	Arg2	103.69	0.847146	0.701045	47.8944	3.97979e-11	2.25179e-09	9.09897	11.2549	32.8854	317.222	244.832	159.442	26.7238	28.0603	3
ENSMUSG00000095028	Sirpb1b	200.128	4.13332	0.64379	47.8203	4.13005e-11	2.33021e-09	15.5982	6.2527	34.0194	436.659	327.096	214.668	354.632	212.103	2
ENSMUSG00000027506	Tpd52	1642.92	1.33634	0.283077	47.7904	4.19223e-11	2.35863e-09	646.027	799.096	707.604	2171.83	3158.33	1836.7	2046.9	1776.88	3
ENSMUSG00000011382	Dhdh	1463.58	-1.53591	0.248405	47.7426	4.29369e-11	2.40218e-09	2175.95	2658.65	2042.3	885.738	1177.15	1199.83	797.379	771.658	1
ENSMUSG00000020017	Hal	389.911	3.22508	0.518883	47.746	4.28645e-11	2.40218e-09	116.987	76.283	207.519	192.053	143.961	86.4017	1121.68	1174.41	2
ENSMUSG00000027360	Hdc	912.784	-0.613084	0.434409	47.6057	4.59779e-11	2.56513e-09	477.046	286.374	582.866	1113.14	2277.92	2045.14	301.906	217.88	3
ENSMUSG00000040616	Tmem51	137.276	2.86791	0.421583	47.4991	4.84949e-11	2.69802e-09	46.7947	33.7646	28.3495	125.169	167.465	115.796	353.909	226.958	2
ENSMUSG00000053541	Gm4759	248.412	3.1128	0.632889	47.4657	4.93113e-11	2.73582e-09	28.5968	20.0087	27.2155	188.231	795.215	513.066	244.125	170.838	3
ENSMUSG00000024737	Slc15a3	907.209	3.77802	0.633993	47.4202	5.04468e-11	2.79106e-09	89.6899	73.7819	77.1107	463.412	2687.28	1774.35	1244.46	847.586	3
ENSMUSG00000036155	Mgat5	483.997	1.922	0.281997	47.351	5.22217e-11	2.88128e-09	248.272	165.071	250.61	544.629	536.672	475.655	910.775	740.296	2
ENSMUSG00000026956	Uap1l1	357.598	2.32072	0.343662	47.2737	5.42798e-11	2.98658e-09	133.885	147.564	231.332	252.249	283.026	236.046	871.05	705.634	2
ENSMUSG00000004677	Myo9b	1822.21	1.55866	0.233195	47.1876	5.66695e-11	3.10951e-09	952.793	924.15	901.515	2425.03	1949.84	1532.96	3341.19	2550.19	2
ENSMUSG00000037621	Atoh8	278.096	-1.00651	0.26302	47.0516	6.06562e-11	3.31914e-09	231.374	245.106	250.61	363.086	479.871	413.303	106.895	134.524	3
ENSMUSG00000037992	Rara	987.788	1.21803	0.290771	47.0332	6.12181e-11	3.34074e-09	361.359	443.942	526.167	1325.26	1943.97	1261.29	976.501	1063.82	3
ENSMUSG00000024818	Slc25a45	174.679	2.33562	0.338737	46.939	6.41691e-11	3.49223e-09	67.5924	62.527	58.967	230.273	142.982	123.813	434.803	276.476	2
ENSMUSG00000038650	Rnh1	2204.76	2.03176	0.295553	46.9108	6.50814e-11	3.53226e-09	874.801	884.132	1088.62	2019.9	3035.92	1997.04	4051.9	3685.8	2
ENSMUSG00000099757	BE692007	236.072	5.16539	0.745909	46.6887	7.27247e-11	3.9364e-09	15.5982	7.50325	21.5456	93.6379	472.036	429.336	546.031	302.886	3
ENSMUSG00000005824	Tnfsf14	60.2247	1.94912	0.614532	46.6402	7.45087e-11	4.02206e-09	12.9985	5.00216	11.3398	188.231	105.767	75.7128	50.5585	32.1868	3
ENSMUSG00000020205	Phlda1	189.376	-1.41569	0.310559	46.622	7.51914e-11	4.04797e-09	176.78	192.583	144.016	341.11	284.985	236.046	63.5592	75.9278	3
ENSMUSG00000037337	Map4k1	145.058	3.3975	0.478722	46.5987	7.60712e-11	4.08433e-09	23.3974	40.0173	40.8233	94.5934	152.775	95.3091	418.913	294.633	2
ENSMUSG00000031502	Col4a1	22441.1	0.30326	0.177548	46.5795	7.68066e-11	4.11276e-09	16759	13645.9	16844.2	31402.1	29443.5	33811.6	21223	16399.6	3
ENSMUSG00000029135	Fosl2	3787.75	-1.24338	0.22882	46.5273	7.88373e-11	4.21021e-09	4175.13	3746.62	3776.16	4370.41	5306.98	5693.61	1721.15	1511.95	3
ENSMUSG00000048779	P2ry6	185.498	2.78967	0.397986	46.4778	8.08118e-11	4.2984e-09	44.195	65.0281	62.3689	184.409	167.465	106.889	362.576	491.055	2
ENSMUSG00000030707	Coro1a	1321.87	3.38238	0.50173	46.4751	8.09191e-11	4.2984e-09	179.38	141.311	269.887	2546.38	2161.38	878.269	2358.19	2040.15	2
ENSMUSG00000062991	Nrg1	81.7288	2.9394	0.848889	46.3049	8.81082e-11	4.66787e-09	0	10.0043	6.80389	150.967	254.625	157.661	44.0581	29.7109	3
ENSMUSG00000021033	Gstz1	1565.46	-1.39997	0.2029	46.1347	9.59358e-11	5.06911e-09	1995.28	2279.74	2273.63	1454.25	1361.27	1547.21	852.994	759.278	1
ENSMUSG00000021388	Aspn	314.037	0.474906	0.290423	46.1207	9.66105e-11	5.0913e-09	308.065	340.147	510.291	109.881	127.313	199.526	334.408	582.664	1
ENSMUSG00000071547	Nt5dc2	124.503	3.15007	0.463322	46.0212	1.01535e-10	5.33674e-09	23.3974	25.0108	21.5456	193.009	155.713	63.2425	272.293	241.814	2
ENSMUSG00000052392	Acot4	216.293	-3.85194	0.674545	45.975	1.03911e-10	5.44727e-09	337.962	560.242	604.412	94.5934	14.6899	36.5203	56.3366	25.5844	1
ENSMUSG00000025268	Maged2	261.796	1.49749	0.257812	45.9586	1.04764e-10	5.47761e-09	172.881	178.827	190.509	167.211	193.907	171.913	463.693	555.429	2
ENSMUSG00000023764	Sfi1	947.571	1.19083	0.187013	45.9363	1.05937e-10	5.52451e-09	617.43	580.251	532.971	1116.97	1037.11	964.671	1409.86	1321.31	2
ENSMUSG00000036362	P2ry13	113.557	1.73615	0.50252	45.9265	1.06459e-10	5.53724e-09	33.7962	17.5076	29.4835	187.276	269.315	187.946	110.506	72.6266	3
ENSMUSG00000008035	Mid1ip1	1725.11	-0.245478	0.336185	45.8905	1.08393e-10	5.62322e-09	926.796	1029.2	853.888	1900.47	4889.79	2508.32	754.043	938.369	3
ENSMUSG00000004707	Ly9	215.908	4.62352	0.644134	45.7971	1.13575e-10	5.87678e-09	31.1965	15.0065	23.8136	69.7507	261.481	125.594	696.985	503.435	2
ENSMUSG00000044951	Mylk4	26089.6	-0.994076	0.30859	45.7051	1.18923e-10	6.13762e-09	39260.8	51758.6	37677.6	7669.71	13926.1	16762.8	16889.4	24771.5	1
ENSMUSG00000110496	Gm45909	74.4098	-2.293	0.721083	45.6833	1.20227e-10	6.17297e-09	140.384	225.097	144.016	5.73293	1.95866	12.4704	43.3358	22.2832	1
ENSMUSG00000024395	Lims2	559.234	-1.14503	0.222187	45.6881	1.19939e-10	6.17297e-09	864.403	734.067	977.492	403.216	331.992	440.916	355.354	366.434	1
ENSMUSG00000028834	Trim63	16973.1	-1.77941	0.365353	45.6112	1.24637e-10	6.38299e-09	14410.2	11612.5	17615.3	43823.5	21303.3	18119.4	5201.02	3699.83	3
ENSMUSG00000044583	Tlr7	450.045	3.98882	0.582973	45.5481	1.28637e-10	6.57099e-09	71.4919	37.5162	66.9049	243.65	850.057	530.881	1048	751.851	2
ENSMUSG00000030729	Pgm2l1	812.099	-0.817022	0.196081	45.5163	1.30698e-10	6.65924e-09	1110.07	1358.09	1014.91	534.118	595.432	497.033	620.425	766.706	1
ENSMUSG00000033066	Gas7	1821.27	1.33446	0.274332	45.4926	1.32252e-10	6.72128e-09	1576.72	1136.74	1490.05	1133.21	1127.21	851.547	3422.81	3831.88	2
ENSMUSG00000017002	Slpi	167.841	2.10678	0.649438	45.425	1.36804e-10	6.93497e-09	7.79912	28.7624	30.6175	404.172	473.016	203.979	112.673	81.705	3
ENSMUSG00000018846	Pank3	4328.26	-1.9233	0.344801	45.3982	1.38646e-10	7.01058e-09	7145.29	7720.84	8088.69	3753.16	1722.64	1981	2218.07	1996.41	1
ENSMUSG00000025192	Entpd7	265.65	1.91375	0.289485	45.3605	1.41282e-10	7.12583e-09	122.186	116.3	107.728	281.869	337.868	223.576	499.084	436.585	2
ENSMUSG00000046718	Bst2	1484.76	4.30492	0.617726	45.1937	1.53573e-10	7.72623e-09	162.482	175.076	190.509	464.368	2700.99	2198.34	3693.66	2292.69	3
ENSMUSG00000020593	Lpin1	12318.2	-1.10056	0.175834	45.1847	1.54267e-10	7.74165e-09	17479.1	16977.3	16796.5	10243.8	10134.1	11139.6	7529.6	8245.6	1
ENSMUSG00000028150	Rorc	1920.39	-1.34254	0.194071	45.1699	1.55413e-10	7.77963e-09	2581.51	2464.82	2291.78	2342.86	1909.69	1752.08	1017.67	1002.74	1
ENSMUSG00000013707	Tnfaip8l2	106.66	2.89584	0.503269	45.1331	1.58299e-10	7.90428e-09	25.9971	10.0043	26.0816	214.985	147.879	117.578	187.789	122.97	2
ENSMUSG00000032243	Itga11	255.205	-0.00570874	0.351829	45.0975	1.61142e-10	8.0062e-09	383.457	350.151	370.812	68.7952	70.5117	138.955	321.407	337.549	1
ENSMUSG00000036820	Amdhd2	428.939	1.89036	0.287169	45.1014	1.60829e-10	8.0062e-09	224.875	208.84	268.753	319.133	388.793	311.759	930.276	779.086	2
ENSMUSG00000009585	Apobec3	767.24	1.51014	0.363204	45.0557	1.64542e-10	8.15483e-09	262.57	301.38	271.021	962.178	1351.47	1444.78	980.834	563.682	3
ENSMUSG00000071203	Naip5	173.272	3.6331	0.591908	45.0166	1.67794e-10	8.29541e-09	29.8966	15.0065	22.6796	141.412	368.228	248.516	340.909	219.53	3
ENSMUSG00000031827	Cotl1	965.012	3.60872	0.49149	44.9266	1.75511e-10	8.65551e-09	159.882	115.05	206.385	1412.21	1084.12	457.84	2119.84	2164.77	2
ENSMUSG00000028862	Map3k6	821.375	-1.80697	0.289792	44.8968	1.78146e-10	8.76384e-09	857.903	836.612	1122.64	1387.37	815.781	1035.04	278.794	236.862	3
ENSMUSG00000005087	Cd44	3864.3	1.88804	0.350071	44.851	1.82272e-10	8.94479e-09	1191.97	1190.51	1662.42	3651.88	8434.96	5152.93	4395.7	5234.07	3
ENSMUSG00000026271	Gpr35	396.215	2.97645	0.553052	44.8174	1.85361e-10	9.07408e-09	54.5938	50.0216	90.7185	359.264	1003.81	730.406	582.145	298.76	3
ENSMUSG00000022346	Myc	910.363	-1.42738	0.247454	44.5809	2.08628e-10	1.01881e-08	1111.37	947.91	892.443	1141.81	1230.04	1210.51	327.908	420.904	3
ENSMUSG00000029314	Gpat3	832.711	-1.91415	0.27457	44.5107	2.16087e-10	1.05266e-08	1331.05	895.387	1240.58	747.192	832.429	1040.38	333.686	240.988	1
ENSMUSG00000035621	Midn	2863.23	-0.206499	0.29143	44.4431	2.23519e-10	1.08621e-08	2108.36	1535.66	1755.4	4178.35	5992.51	4053.75	1518.92	1762.85	3
ENSMUSG00000009687	Fxyd5	953.287	2.45907	0.415122	44.4374	2.24151e-10	1.08664e-08	193.678	222.596	300.505	1731.35	1570.84	811.464	1500.14	1295.73	2
ENSMUSG00000026072	Il1r1	1068.43	-0.905718	0.208895	44.1814	2.54757e-10	1.23203e-08	1019.09	1081.72	957.08	1268.89	1627.64	1495.55	527.975	569.459	3
ENSMUSG00000074342	I830077J02Rik	139.668	2.08393	0.580421	44.1604	2.57447e-10	1.24203e-08	25.9971	33.7646	13.6078	193.964	358.434	270.785	147.342	73.4519	3
ENSMUSG00000039886	Tmem120a	687.865	-1.10569	0.292628	44.1397	2.60127e-10	1.25193e-08	1090.58	951.662	1336.96	488.255	284.005	313.54	598.034	439.886	1
ENSMUSG00000029580	Actb	44440.9	1.74731	0.320602	44.0614	2.7051e-10	1.29878e-08	17878.2	15730.6	19317.4	45792.8	82244	57317.3	63469.7	53777.5	3
ENSMUSG00000027452	Acss1	1762.44	-1.20192	0.178394	44.0166	2.7664e-10	1.32185e-08	2131.76	2092.15	2889.38	1525.92	1446.47	2201.91	917.275	894.628	1
ENSMUSG00000006930	Hap1	176.165	4.44109	0.889436	44.0193	2.76267e-10	1.32185e-08	3.89956	8.75379	6.80389	95.5489	433.843	660.929	151.675	47.8676	3
ENSMUSG00000030844	Rgs10	93.6856	2.63952	0.424867	43.87	2.97683e-10	1.419e-08	36.3959	32.5141	40.8233	57.3293	63.6564	40.974	260.737	217.055	2
ENSMUSG00000038894	Irs2	3229.22	-1.92707	0.280258	43.8519	3.00382e-10	1.42846e-08	5163.02	4143.04	4966.84	3915.59	1761.81	3498.82	1362.91	1021.72	1
ENSMUSG00000032193	Ldlr	1073.71	1.22893	0.353866	43.8342	3.03054e-10	1.43774e-08	349.661	443.942	441.119	1135.12	2755.83	1559.68	951.944	952.399	3
ENSMUSG00000046908	Ltb4r1	98.8607	3.22128	0.54924	43.8095	3.06828e-10	1.4522e-08	10.3988	17.5076	15.8757	171.988	175.3	84.6202	191.4	123.795	2
ENSMUSG00000058672	Tubb2a	486.215	1.65201	0.249469	43.7858	3.10487e-10	1.46604e-08	301.566	230.1	295.969	451.946	463.222	420.429	937.498	788.989	2
ENSMUSG00000033220	Rac2	616.916	3.1872	0.521854	43.7289	3.19435e-10	1.50473e-08	89.6899	60.026	130.408	1386.41	1007.73	448.933	1037.17	774.959	2
ENSMUSG00000026100	Mstn	1069.04	-1.23186	0.213368	43.7235	3.20306e-10	1.50529e-08	1368.75	2050.89	1280.26	652.599	1016.54	790.977	578.533	813.748	1
ENSMUSG00000041112	Elmo1	591.353	1.34633	0.214872	43.6624	3.30242e-10	1.54834e-08	356.16	315.136	341.328	689.863	673.778	608.375	909.33	836.857	2
ENSMUSG00000107894	Gm10388	62.4176	3.36391	0.652688	43.531	3.52666e-10	1.6496e-08	6.49927	10.0043	5.6699	96.5044	121.437	93.5276	111.229	54.47	3
ENSMUSG00000048677	Tpcn2	421.537	2.32274	0.343608	43.4867	3.60562e-10	1.67867e-08	166.381	146.313	158.757	592.403	285.964	251.188	1080.51	690.778	2
ENSMUSG00000022378	Fam49b	1714.26	1.56032	0.268601	43.4894	3.60077e-10	1.67867e-08	750.015	790.342	883.371	2019.9	2614.81	1818.89	2600.15	2236.57	3
ENSMUSG00000032434	Cmtm6	1304.26	1.04072	0.264861	43.4703	3.63532e-10	1.68465e-08	630.429	641.527	748.427	1695.99	1936.13	2143.12	1579.59	1058.86	3
ENSMUSG00000052087	Rgs14	208.914	4.4832	0.741628	43.4727	3.63096e-10	1.68465e-08	5.19941	7.50325	37.4214	384.107	462.243	284.146	291.795	198.898	3
ENSMUSG00000045980	Tmem104	442.4	1.51846	0.232809	43.4083	3.74976e-10	1.73366e-08	301.566	238.853	252.878	443.347	385.855	321.557	851.549	743.598	2
ENSMUSG00000005054	Cstb	657.764	2.17762	0.329348	43.3839	3.79583e-10	1.7509e-08	270.37	277.62	254.012	483.477	905.879	562.947	1332.58	1175.23	2
ENSMUSG00000034959	Rubcnl	139.112	4.50774	0.692027	43.308	3.94261e-10	1.81025e-08	3.89956	18.7581	22.6796	92.6824	256.584	277.02	279.516	161.759	3
ENSMUSG00000025058	5430427O19Rik	125.92	3.50395	0.593809	43.3118	3.93511e-10	1.81025e-08	12.9985	22.5097	18.1437	76.4391	319.261	200.416	183.455	174.139	3
ENSMUSG00000022861	Dgkg	73.9421	1.23328	0.472437	43.2058	4.14926e-10	1.90076e-08	22.0975	17.5076	29.4835	168.166	121.437	129.157	54.1698	49.5182	3
ENSMUSG00000042265	Trem1	219.798	-0.520331	0.629855	43.0851	4.40746e-10	2.01442e-08	58.4934	32.5141	129.274	558.961	572.907	319.775	36.1132	50.3435	3
ENSMUSG00000039911	Spsb1	946.38	-1.10178	0.243132	43.038	4.51252e-10	2.05773e-08	976.19	794.093	968.42	1127.48	1313.28	1590.86	426.858	373.862	3
ENSMUSG00000017057	Il13ra1	900.658	1.85956	0.456491	42.9808	4.64352e-10	2.11264e-08	220.975	175.076	329.988	987.02	2371.93	1535.63	902.107	682.525	3
ENSMUSG00000036875	Dna2	153.506	2.83433	0.429052	42.9525	4.70962e-10	2.13785e-08	28.5968	42.5184	55.5651	186.32	188.031	134.502	278.072	314.44	2
ENSMUSG00000081665	Gm15922	79.928	5.07095	0.739756	42.9404	4.73809e-10	2.14589e-08	2.59971	5.00216	9.07185	101.282	70.5117	39.1925	243.403	168.362	2
ENSMUSG00000033721	Vav3	500.178	2.17262	0.358685	42.9002	4.83448e-10	2.18459e-08	202.777	133.808	175.767	609.602	751.145	484.562	1025.61	618.152	3
ENSMUSG00000030748	Il4ra	2582.38	0.408468	0.285996	42.8679	4.91305e-10	2.21509e-08	1433.74	1316.82	1561.49	3882.15	4796.75	3823.05	2314.13	1530.94	3
ENSMUSG00000030852	Tacc2	52922.3	-0.728464	0.18263	42.7327	5.25667e-10	2.36467e-08	53482.5	46361.3	51347.8	68913.7	71885.7	70949.2	29162.8	31275.7	3
ENSMUSG00000038754	Elovl3	93.7453	-4.88363	0.793451	42.6699	5.42432e-10	2.43461e-08	57.1936	565.244	61.235	13.3768	21.5452	16.924	2.88906	11.5542	1
ENSMUSG00000034041	Lyl1	154.079	3.10907	0.455948	42.6445	5.49356e-10	2.46016e-08	37.6958	27.5119	70.3068	178.676	116.54	122.922	371.966	307.013	2
ENSMUSG00000002944	Cd36	18415.5	-1.22843	0.22107	42.621	5.5587e-10	2.47915e-08	27931.3	23991.6	31082.4	11636.9	12073.2	19571.3	11169.8	9867.32	1
ENSMUSG00000046157	Tmem229b	420.279	2.38249	0.398952	42.6202	5.56081e-10	2.47915e-08	98.7889	152.566	148.551	338.243	765.835	607.484	696.985	553.778	3
ENSMUSG00000030447	Cyfip1	2127.59	1.36301	0.211101	42.5811	5.67073e-10	2.52253e-08	1327.15	1436.87	1364.18	1803.01	2128.08	1721.8	3846.78	3392.82	2
ENSMUSG00000040296	Ddx58	2856.54	3.34717	0.6275	42.5033	5.8957e-10	2.61677e-08	331.463	322.64	289.165	1403.61	7344.96	7418.97	3616.37	2125.15	3
ENSMUSG00000025491	Ifitm1	281.948	0.749167	0.531281	42.4199	6.14674e-10	2.71612e-08	54.5938	68.7797	111.13	782.546	646.357	321.557	122.063	148.554	3
ENSMUSG00000046207	Pik3r6	231.586	2.06227	0.395145	42.424	6.13398e-10	2.71612e-08	61.0931	86.2873	77.1107	236.961	431.884	370.548	332.964	255.844	3
ENSMUSG00000036006	Ripor2	597.61	0.31768	0.34977	42.4086	6.18152e-10	2.72547e-08	267.77	271.367	332.256	1349.15	1087.05	702.793	390.022	380.464	3
ENSMUSG00000078566	Bnip3	2488.36	-1.43304	0.216408	42.3992	6.21056e-10	2.73223e-08	3321.13	3115.1	4165.11	2527.27	1840.16	2515.45	1206.18	1216.5	1
ENSMUSG00000056737	Capg	1182.93	3.07808	0.46286	42.3778	6.27741e-10	2.75558e-08	350.96	242.605	271.021	640.178	1844.08	965.561	2736.66	2412.36	2
ENSMUSG00000104262	Gm37747	105.855	2.62152	0.59246	42.3711	6.29855e-10	2.75879e-08	22.0975	13.7559	15.8757	116.57	210.556	269.894	127.118	70.976	3
ENSMUSG00000028427	Aqp7	824.849	-1.67443	0.431408	42.3661	6.31416e-10	2.75958e-08	1696.31	1331.83	1674.89	199.697	216.432	645.786	535.92	297.934	1
ENSMUSG00000031596	Slc7a2	5850.87	-2.03315	0.31436	42.3342	6.41576e-10	2.79177e-08	10093.4	9367.8	8887.01	5393.74	3448.22	5062.07	1875	2679.76	1
ENSMUSG00000026222	Sp100	3227.89	3.28992	0.584862	42.3367	6.40778e-10	2.79177e-08	462.748	457.698	410.501	1635.8	7551.6	7451.93	4760.44	3092.41	3
ENSMUSG00000031584	Gsr	1452.25	0.604904	0.228152	42.2573	6.66737e-10	2.89494e-08	926.796	794.093	849.352	2589.38	2036.02	1668.35	1429.36	1324.61	3
ENSMUSG00000023951	Vegfa	5490.44	-1.02451	0.203751	42.2144	6.81162e-10	2.95116e-08	8272.27	7454.47	8386.92	3835.33	3447.24	5139.57	3895.89	3491.86	1
ENSMUSG00000000958	Slc7a7	187.767	2.69774	0.404583	42.1152	7.15813e-10	3.09457e-08	64.9927	41.2678	83.9146	171.988	204.68	159.442	404.468	371.386	2
ENSMUSG00000050335	Lgals3	2441.14	4.27014	0.605068	42.0343	7.45373e-10	3.21541e-08	283.368	213.842	443.387	871.406	4650.83	1918.65	5829.39	5318.25	2
ENSMUSG00000051980	Casr	288.795	-1.88112	0.281922	41.9348	7.83402e-10	3.37217e-08	387.356	445.193	427.511	202.564	313.385	315.322	101.839	117.193	1
ENSMUSG00000035697	Arhgap45	1256.43	3.07546	0.49712	41.9232	7.87949e-10	3.38445e-08	188.479	177.577	283.495	3148.34	1417.09	907.663	2085.9	1842.9	2
ENSMUSG00000002227	Mov10	803.981	2.90903	0.525243	41.867	8.10397e-10	3.4734e-08	158.582	115.05	201.849	544.629	1563.01	1858.08	1295.74	694.905	3
ENSMUSG00000028967	Errfi1	2919.31	-1.19769	0.247563	41.8468	8.18617e-10	3.50112e-08	2588.01	2461.06	3813.58	3163.62	4569.55	4431.43	1042.23	1285	3
ENSMUSG00000039294	BC017643	464.077	1.99384	0.357813	41.6857	8.87296e-10	3.78675e-08	191.078	162.57	159.891	458.635	684.551	717.936	797.379	540.573	3
ENSMUSG00000075602	Ly6a	5667.54	3.0091	0.457609	41.6618	8.97952e-10	3.82405e-08	1562.42	1575.68	1513.86	2937.17	7549.64	6275.26	15296.1	8630.19	2
ENSMUSG00000037225	Fgf2	856.245	-0.764945	0.240651	41.5757	9.37477e-10	3.98388e-08	803.309	742.821	641.833	1098.81	1509.15	1147.27	412.413	494.356	3
ENSMUSG00000012428	Steap4	9129.06	0.0436799	0.446764	41.5479	9.50588e-10	4.03102e-08	3872.26	3716.61	3576.58	10881.1	21715.6	21803.5	5089.07	2377.7	3
ENSMUSG00000002504	Slc9a3r2	674.848	-1.08652	0.2318	41.4411	1.00274e-09	4.24318e-08	974.89	1055.46	1043.26	471.056	404.463	513.066	434.803	501.784	1
ENSMUSG00000027470	Mylk2	21333.8	-1.3685	0.218515	41.404	1.02151e-09	4.31345e-08	31179.6	31257.3	29593.5	18893.8	17167.6	18622.7	10276.4	13679.4	1
ENSMUSG00000026697	Myoc	732.32	-1.1026	0.286519	41.3734	1.03724e-09	4.37061e-08	1182.87	1241.79	1123.78	392.706	339.827	517.52	460.082	599.995	1
ENSMUSG00000024900	Cpt1a	1193.35	1.4471	0.242787	41.2399	1.10883e-09	4.66245e-08	830.606	619.018	1080.68	1119.83	750.166	969.124	2298.97	1878.39	2
ENSMUSG00000072964	Bhlhb9	258.974	-1.74601	0.33189	41.2243	1.11751e-09	4.68907e-08	493.944	357.655	484.21	183.454	154.734	117.578	176.232	103.988	1
ENSMUSG00000041577	Prelp	4231.53	-1.01014	0.169809	41.1504	1.15958e-09	4.8554e-08	5849.34	5113.46	6435.34	3759.85	3111.33	4182.91	2816.83	2583.2	1
ENSMUSG00000025534	Gusb	684.427	1.6802	0.261771	41.1308	1.17101e-09	4.89302e-08	349.661	393.92	412.769	601.958	687.489	481.89	1307.3	1240.43	2
ENSMUSG00000026879	Gsn	34504.5	-1.0753	0.177795	41.1142	1.18075e-09	4.92342e-08	51076.4	41075.3	50668.5	30911	27064.7	31721.9	21918.5	21599.8	1
ENSMUSG00000037321	Tap1	2272.69	3.73893	0.650767	41.0977	1.19054e-09	4.95389e-08	214.476	315.136	199.581	1048.17	5463.67	5328.4	3754.33	1857.76	3
ENSMUSG00000028656	Cap1	2971.98	1.49648	0.263172	41.0307	1.23111e-09	5.11207e-08	1492.23	1411.86	1451.5	3392.94	4442.23	3015.15	4778.5	3791.44	3
ENSMUSG00000044749	Abca6	456.397	-0.833959	0.32764	41.0133	1.24187e-09	5.14603e-08	748.716	614.016	913.989	217.852	122.416	323.338	339.464	371.386	1
ENSMUSG00000075284	Wipf1	1117.27	1.34968	0.228419	40.9666	1.27119e-09	5.25662e-08	668.125	561.493	587.402	1392.15	1424.92	1019.9	1681.43	1602.74	2
ENSMUSG00000067212	H2-T23	2720.07	3.24111	0.508368	40.9426	1.28658e-09	5.30927e-08	495.244	609.013	680.389	1510.63	4606.76	4057.32	6509.04	3292.13	3
ENSMUSG00000022425	Enpp2	980.136	-1.37967	0.268346	40.9079	1.30904e-09	5.37971e-08	1454.54	1666.97	1553.55	543.673	633.626	865.799	603.813	519.115	1
ENSMUSG00000015355	Cd48	217.491	4.7179	0.672199	40.908	1.30899e-09	5.37971e-08	18.1979	25.0108	34.0194	51.5964	306.53	110.452	665.927	528.194	2
ENSMUSG00000025492	Ifitm3	4749.5	3.04963	0.513209	40.8964	1.3166e-09	5.3997e-08	1123.07	796.595	926.462	2805.32	9721.8	7359.29	8878.07	6385.37	3
ENSMUSG00000034472	Rasd2	408.045	-0.813154	0.267552	40.8695	1.33444e-09	5.46163e-08	566.736	686.547	637.297	163.389	259.522	266.331	321.407	363.133	1
ENSMUSG00000028459	Cd72	84.1106	4.76923	0.760547	40.8375	1.35596e-09	5.53836e-08	11.6987	13.7559	1.13398	17.1988	32.3178	14.2518	411.69	170.838	2
ENSMUSG00000030313	Dennd5b	729.89	-0.92543	0.226183	40.7777	1.39709e-09	5.68088e-08	1137.37	1006.69	1139.65	452.902	418.173	603.921	560.477	519.941	1
ENSMUSG00000015947	Fcgr1	1676.3	8.02989	1.06917	40.7745	1.39939e-09	5.68088e-08	15.5982	10.0043	22.6796	418.504	3712.63	2258.91	4166.02	2806.03	3
ENSMUSG00000032596	Uba7	1519.19	3.36512	0.60743	40.7775	1.39724e-09	5.68088e-08	191.078	200.087	215.456	737.638	3234.72	4092.95	2270.08	1211.54	3
ENSMUSG00000064246	Chil1	184.721	0.775551	0.536928	40.7622	1.40799e-09	5.70421e-08	66.2925	28.7624	53.2971	495.899	466.16	171.022	104.728	91.6086	3
ENSMUSG00000029919	Hpgds	128.37	1.63635	0.39028	40.7398	1.42383e-09	5.75672e-08	84.4905	86.2873	103.192	57.3293	64.6357	38.3018	311.296	281.428	2
ENSMUSG00000034987	Hrh2	96.4951	1.64906	0.415079	40.7328	1.42883e-09	5.76524e-08	38.9956	27.5119	27.2155	169.122	163.548	132.72	133.619	79.229	3
ENSMUSG00000052560	Cpne8	460.615	-0.773946	0.272525	40.6991	1.45309e-09	5.85133e-08	467.947	307.633	357.204	685.086	622.853	813.245	253.515	177.44	3
ENSMUSG00000075012	Fjx1	97.0691	-0.198701	0.453893	40.679	1.46777e-09	5.89855e-08	51.9941	40.0173	43.0913	143.323	248.749	167.459	39.0022	42.9157	3
ENSMUSG00000024521	Pmaip1	150.376	3.2109	0.522133	40.6142	1.51616e-09	6.08076e-08	31.1965	15.0065	47.6272	181.543	233.08	179.929	309.129	205.5	3
ENSMUSG00000026180	Cxcr2	735.768	0.752909	0.672378	40.5459	1.56883e-09	6.27941e-08	106.588	67.5292	208.652	3240.06	1183.03	688.541	175.51	216.229	3
ENSMUSG00000021990	Spata13	576.202	0.208227	0.325781	40.5135	1.5944e-09	6.36897e-08	284.668	285.123	381.018	1061.55	1091.95	765.145	411.69	328.47	3
ENSMUSG00000028382	Ptbp3	2711.26	1.14559	0.216128	40.4574	1.63977e-09	6.53716e-08	1572.82	1418.11	1727.05	3475.11	3429.61	3140.75	3888.67	3037.94	3
ENSMUSG00000027792	Bche	718.827	-1.44052	0.241858	40.3041	1.77046e-09	7.04411e-08	894.299	1170.51	1185.01	485.388	553.321	733.078	374.133	354.88	1
ENSMUSG00000074743	Thbd	4098.37	0.150525	0.421141	40.2748	1.79656e-09	7.13372e-08	1875.69	1614.45	1703.24	8578.38	10168.4	4214.09	3208.3	1424.47	3
ENSMUSG00000032202	Rab27a	222.63	1.66114	0.486693	40.2381	1.82978e-09	7.25121e-08	41.5953	51.2722	83.9146	540.807	412.297	278.801	213.068	159.283	3
ENSMUSG00000026430	Rassf5	341.265	2.35112	0.416765	40.2088	1.8568e-09	7.34375e-08	89.6899	77.5335	109.996	742.415	400.545	297.507	556.865	455.567	2
ENSMUSG00000024696	Lpxn	323.584	4.15723	0.642027	40.1674	1.89569e-09	7.48272e-08	41.5953	47.5206	35.1534	96.5044	587.597	404.396	756.932	618.977	2
ENSMUSG00000019866	Crybg1	1108.42	2.77158	0.500486	40.1409	1.92092e-09	7.56735e-08	270.37	226.348	219.992	768.213	2392.5	1784.15	1935.67	1270.14	3
ENSMUSG00000026922	Agpat2	1509.87	-2.24608	0.518561	40.0792	1.98112e-09	7.78914e-08	2312.44	5100.96	1984.47	406.083	358.434	637.769	783.656	495.182	1
ENSMUSG00000105728	Gm42819	182.127	1.49623	0.305979	40.042	2.01828e-09	7.91829e-08	88.39	65.0281	89.5845	301.935	223.287	230.701	265.793	192.296	2
ENSMUSG00000018819	Lsp1	1547.87	1.53847	0.288731	40.0385	2.02189e-09	7.91829e-08	755.215	599.009	714.408	2126.92	2439.51	1454.58	2197.85	2095.44	3
ENSMUSG00000031725	Ces1f	289.395	-2.49754	0.425328	39.9821	2.07972e-09	8.12881e-08	447.15	478.957	674.719	137.59	134.168	277.911	118.451	46.2169	1
ENSMUSG00000029552	Tes	274.868	0.794536	0.378717	39.9447	2.11898e-09	8.26608e-08	136.485	95.0411	114.532	397.483	632.646	404.396	226.069	192.296	3
ENSMUSG00000037613	Tnfrsf23	197.25	2.18026	0.34297	39.9276	2.13708e-09	8.32045e-08	100.089	72.5314	90.7185	195.875	160.61	162.115	349.576	446.489	2
ENSMUSG00000026384	Ptpn4	2067.16	-0.485693	0.225655	39.8805	2.18811e-09	8.46958e-08	2724.49	3035.06	3010.72	1136.08	1202.62	1395.79	2255.63	1776.88	1
ENSMUSG00000031129	Slc9a9	209.459	1.76331	0.313944	39.8825	2.18584e-09	8.46958e-08	133.885	107.547	141.748	162.433	136.127	114.905	450.693	428.332	2
ENSMUSG00000101389	Ms4a4a	460.189	3.45738	0.589165	39.8868	2.18116e-09	8.46958e-08	68.8922	41.2678	90.7185	311.489	1167.36	655.584	756.932	589.266	3
ENSMUSG00000022436	Sh3bp1	44.7681	4.00995	0.661815	39.8698	2.1998e-09	8.49836e-08	6.49927	3.75162	6.80389	58.2848	49.9458	36.5203	116.284	80.0544	2
ENSMUSG00000022436	Sh3bp1	44.7681	4.00995	0.661815	39.8698	2.1998e-09	8.49836e-08	6.49927	3.75162	6.80389	58.2848	49.9458	36.5203	116.284	80.0544	2
ENSMUSG00000022636	Alcam	635.117	2.44975	0.409422	39.8541	2.21712e-09	8.54876e-08	140.384	166.322	294.835	623.934	1191.84	745.549	988.779	929.291	3
ENSMUSG00000008305	Tle1	1082.71	-1.14162	0.201322	39.7823	2.29823e-09	8.84442e-08	1172.47	1209.27	1241.71	1207.74	1468.01	1259.51	500.529	602.471	3
ENSMUSG00000036894	Rap2b	356.034	2.43287	0.383134	39.7642	2.31909e-09	8.90755e-08	157.282	105.045	196.179	236.006	340.806	247.626	829.159	736.17	2
ENSMUSG00000014846	Tppp3	662.902	1.24653	0.349045	39.7164	2.3752e-09	9.10555e-08	603.132	541.484	652.039	176.765	345.703	407.068	1304.41	1272.62	2
ENSMUSG00000035673	Sbno2	4902.53	-0.0270365	0.335964	39.5969	2.52136e-09	9.64733e-08	3027.36	2731.18	2566.2	6467.71	10575.8	8267.84	3394.64	2189.53	3
ENSMUSG00000027624	Epb41l1	1192.46	0.54662	0.236099	39.5817	2.54062e-09	9.70243e-08	1297.25	1104.23	1402.73	881.916	543.527	650.24	2033.89	1625.85	2
ENSMUSG00000020102	Slc16a7	252.489	-0.87598	0.281103	39.5634	2.56394e-09	9.77282e-08	356.16	402.674	439.985	121.347	124.375	175.476	216.679	183.217	1
ENSMUSG00000078780	Gm5150	132.204	3.86932	0.629166	39.5078	2.63633e-09	1.00236e-07	7.79912	15.0065	18.1437	276.136	184.114	84.6202	273.738	198.073	2
ENSMUSG00000022372	Sla	554.95	1.57693	0.550234	39.5052	2.63976e-09	1.00236e-07	105.288	78.7841	172.365	1712.24	1118.39	521.973	369.077	361.483	3
ENSMUSG00000050721	Plekho2	2048.55	2.52004	0.405237	39.473	2.6825e-09	1.01665e-07	713.62	528.979	757.499	1549.8	3171.07	2229.52	4435.42	3002.45	2
ENSMUSG00000021707	Dhfr	200.778	2.96763	0.477009	39.458	2.70269e-09	1.02236e-07	59.7933	57.5249	63.5029	126.125	97.9329	81.0573	859.494	260.796	2
ENSMUSG00000055296	Tmem245	2498.76	-0.876526	0.202697	39.3974	2.78588e-09	1.05184e-07	3809.87	3207.64	3820.38	1891.87	1472.91	2062.95	1857.66	1866.83	1
ENSMUSG00000026648	Dclre1c	549.823	1.88371	0.336606	39.3551	2.84539e-09	1.07228e-07	232.674	190.082	251.744	550.362	847.119	727.734	923.775	675.098	3
ENSMUSG00000039982	Dtx4	608.98	1.09326	0.259187	39.3122	2.90708e-09	1.09347e-07	324.963	298.879	332.256	869.495	895.106	756.238	814.714	580.188	3
ENSMUSG00000045294	Insig1	1267.84	-1.58578	0.371975	39.1742	3.11477e-09	1.16939e-07	1763.9	3267.66	1779.22	495.899	689.447	659.147	860.216	627.23	1
ENSMUSG00000040483	Xaf1	1056.19	3.99626	0.67812	39.15	3.15271e-09	1.18141e-07	106.588	102.544	116.8	394.617	2425.8	2352.44	1971.06	979.634	3
ENSMUSG00000017754	Pltp	567.433	-0.0660782	0.254836	39.0823	3.26131e-09	1.2184e-07	740.917	660.286	815.332	376.463	258.543	264.55	800.268	623.103	1
ENSMUSG00000032402	Smad3	2880.19	-0.875645	0.228711	39.0809	3.26363e-09	1.2184e-07	2473.62	3111.35	2349.61	3402.5	5311.88	3343.84	1503.75	1544.97	3
ENSMUSG00000027068	Dhrs9	323.965	0.295071	0.371184	39.0661	3.28771e-09	1.2251e-07	129.985	155.067	196.179	729.038	535.693	450.714	192.844	202.199	3
ENSMUSG00000022462	Slc38a2	7399.75	-1.0956	0.193352	39.0372	3.33559e-09	1.24063e-07	8759.71	7798.37	8239.51	9187.03	8833.54	8574.26	3616.37	4189.24	3
ENSMUSG00000054252	Fgfr3	182.684	-1.57313	0.366809	39.0103	3.3808e-09	1.25511e-07	298.966	276.37	407.099	101.282	88.1396	77.4943	92.4498	119.669	1
ENSMUSG00000030148	Clec4a2	188.022	4.57951	0.657159	38.9802	3.43209e-09	1.27178e-07	20.7977	7.50325	29.4835	204.475	206.638	79.2758	576.367	379.639	2
ENSMUSG00000118590		61.9943	3.75521	0.69572	38.9256	3.52714e-09	1.30459e-07	6.49927	7.50325	9.07185	43.9525	114.581	148.753	94.6166	70.976	3
ENSMUSG00000025986	Slc39a10	644.91	0.426958	0.289619	38.8985	3.57523e-09	1.31993e-07	386.056	331.393	370.812	1010.91	1169.32	873.815	605.979	411.001	3
ENSMUSG00000054293	A630033H20Rik	93.4963	4.47414	0.706318	38.7908	3.773e-09	1.38527e-07	18.1979	7.50325	4.53592	34.3976	110.664	44.537	254.959	273.175	2
ENSMUSG00000027883	Gpsm2	199.185	2.33632	0.413571	38.7885	3.77729e-09	1.38527e-07	53.294	63.7776	69.1728	178.676	376.062	245.844	323.574	283.079	3
ENSMUSG00000029752	Asns	544.929	-1.34319	0.239606	38.7871	3.77996e-09	1.38527e-07	581.035	627.772	625.957	751.014	615.998	674.29	267.96	215.404	3
ENSMUSG00000031628	Casp3	387.806	2.57016	0.48358	38.7948	3.76552e-09	1.38527e-07	77.9912	125.054	86.1825	324.866	732.538	704.575	655.093	396.145	3
ENSMUSG00000056201	Cfl1	2536.6	1.61045	0.272203	38.7595	3.8325e-09	1.40195e-07	1181.57	1193.02	1343.77	2812.96	3606.87	2352.44	4160.96	3641.24	2
ENSMUSG00000106871	Gm3289	45.2649	-3.04553	0.55701	38.7437	3.86298e-09	1.41052e-07	96.1892	85.0368	90.7185	24.8427	17.6279	25.8314	14.4453	7.42772	1
ENSMUSG00000097762	4732463B04Rik	26.6943	-3.98275	0.855418	38.6191	4.11113e-09	1.49839e-07	57.1936	76.283	57.833	7.64391	1.95866	3.56296	5.77811	3.30121	1
ENSMUSG00000107480	Gm44165	25.3525	-0.388325	0.910421	38.6153	4.11894e-09	1.4985e-07	5.19941	3.75162	6.80389	40.1305	80.3049	58.7888	2.88906	4.95182	3
ENSMUSG00000057614	Gnai1	727.782	-1.07749	0.26958	38.5992	4.15226e-09	1.50787e-07	1087.98	907.893	1471.91	474.878	344.724	521.082	674.594	339.199	1
ENSMUSG00000045349	Sh2d5	63.1047	0.246191	0.739201	38.4249	4.53051e-09	1.64225e-07	16.8981	10.0043	9.07185	64.0178	198.804	177.257	12.2785	16.5061	3
ENSMUSG00000029771	Irf5	892.796	3.38064	0.555686	38.3882	4.61437e-09	1.66962e-07	163.782	130.056	197.313	437.614	1867.58	1252.38	1778.94	1314.71	3
ENSMUSG00000024486	Hbegf	707.506	-1.13192	0.430916	38.3276	4.75626e-09	1.71785e-07	413.353	420.182	458.128	1070.15	2004.69	797.212	124.952	371.386	3
ENSMUSG00000069893	9930111J21Rik1	441.547	3.39686	0.651914	38.201	5.06697e-09	1.82676e-07	57.1936	36.2657	66.9049	221.673	1134.06	1065.32	571.311	379.639	3
ENSMUSG00000031508	Ankrd10	1661.99	0.828805	0.297707	38.1968	5.07775e-09	1.82735e-07	907.298	725.314	823.27	2665.81	3235.7	1760.1	1607.04	1571.38	3
ENSMUSG00000033096	Apmap	1037.55	-1.3099	0.244645	38.1773	5.12753e-09	1.84194e-07	1542.93	1605.69	1554.69	721.394	694.344	973.578	663.038	544.7	1
ENSMUSG00000056529	Ptafr	1848.16	3.90577	0.61005	38.1694	5.14771e-09	1.84587e-07	263.87	170.074	379.884	824.587	3834.07	2194.78	4282.3	2835.74	3
ENSMUSG00000029070	Mxra8	604.371	0.188757	0.233822	38.0144	5.56261e-09	1.99108e-07	675.924	750.325	749.561	378.374	300.654	343.825	811.825	824.477	1
ENSMUSG00000031503	Col4a2	12267	0.437851	0.17952	37.9412	5.76984e-09	2.06156e-07	9257.56	7553.27	8981.13	16702.9	15549.8	17221.6	12994.2	9875.57	3
ENSMUSG00000030427	Lilra6	273.816	3.758	0.587069	37.8821	5.94304e-09	2.11918e-07	28.5968	25.0108	52.1631	567.561	337.868	161.224	551.81	466.296	2
ENSMUSG00000031328	Flna	9534.75	1.20494	0.220015	37.879	5.95234e-09	2.11918e-07	5819.44	4865.85	5948.86	11554.7	12266.1	9988.75	13480.3	12354	2
ENSMUSG00000000058	Cav2	1413.65	-0.756836	0.208537	37.8433	6.0595e-09	2.15349e-07	1944.58	1882.06	2266.83	1011.86	828.512	1080.47	1332.58	962.303	1
ENSMUSG00000030720	Cln3	436.614	1.99343	0.356198	37.771	6.28248e-09	2.22877e-07	131.285	170.074	205.251	539.851	625.791	521.082	788.712	510.862	3
ENSMUSG00000032046	Abhd12	972.337	1.24655	0.229019	37.7528	6.33989e-09	2.24515e-07	714.919	767.832	688.326	737.638	654.192	848.875	1743.54	1623.37	2
ENSMUSG00000092528	Nlrp1c-ps	92.4999	3.63941	0.5928	37.7278	6.41958e-09	2.26935e-07	24.6972	18.7581	14.7418	41.086	74.429	81.0573	318.518	166.711	2
ENSMUSG00000012519	Mlkl	586.233	3.44088	0.65421	37.7003	6.5084e-09	2.29668e-07	61.0931	87.5379	65.7709	278.047	1387.71	1516.93	842.16	450.615	3
ENSMUSG00000069892	9930111J21Rik2	716.736	2.97884	0.600704	37.6934	6.53098e-09	2.30059e-07	107.888	107.547	117.934	397.483	1666.82	1832.25	970	533.971	3
ENSMUSG00000014361	Mertk	480.191	1.60579	0.261644	37.6299	6.74157e-09	2.37059e-07	269.07	266.365	291.433	524.564	395.649	363.422	934.609	796.417	2
ENSMUSG00000035184	Fam124a	188.891	-0.788427	0.2754	37.6247	6.75939e-09	2.37172e-07	291.167	233.851	360.606	108.926	87.1602	121.141	164.676	143.603	1
ENSMUSG00000036905	C1qb	714.783	2.3302	0.382865	37.6192	6.77796e-09	2.37172e-07	408.154	205.089	359.472	815.032	363.331	347.388	1687.21	1532.59	2
ENSMUSG00000098055	Gm26947	20.1787	7.3203	1.37993	37.6185	6.78041e-09	2.37172e-07	0	0	2.26796	6.68842	3.91731	12.4704	81.6158	54.47	2
ENSMUSG00000021699	Pde4d	5787.37	-1.80285	0.344283	37.5792	6.91477e-09	2.41449e-07	10277.9	9151.46	9947.28	2644.79	3280.75	5837.01	1950.11	3209.6	1
ENSMUSG00000056938	Acbd4	669.228	-1.01532	0.233772	37.5611	6.97767e-09	2.4322e-07	1022.98	1016.69	938.936	514.053	388.793	476.546	563.366	432.459	1
ENSMUSG00000038776	Ephx1	493.174	-0.0894226	0.245046	37.5194	7.12453e-09	2.47906e-07	622.63	615.266	731.418	288.558	207.618	340.262	613.924	525.718	1
ENSMUSG00000024079	Eif2ak2	2011.97	2.78027	0.589933	37.5074	7.1674e-09	2.48964e-07	304.166	376.413	281.227	1109.32	4854.53	5293.66	2395.03	1481.42	3
ENSMUSG00000001768	Rin2	2254.31	1.44053	0.402547	37.4436	7.39986e-09	2.56593e-07	838.406	806.599	764.303	2158.45	4635.16	4690.63	2432.58	1708.38	3
ENSMUSG00000089942	Pira2	70.6405	4.79172	0.740473	37.3958	7.57879e-09	2.62342e-07	2.59971	7.50325	7.93787	63.0623	67.5737	25.8314	241.236	149.38	2
ENSMUSG00000089942	Pira2	70.6405	4.79172	0.740473	37.3958	7.57879e-09	2.62342e-07	2.59971	7.50325	7.93787	63.0623	67.5737	25.8314	241.236	149.38	2
ENSMUSG00000030972	Acsm5	84.8683	-1.71575	0.424495	37.3759	7.65474e-09	2.64512e-07	96.1892	176.326	214.322	31.5311	33.2972	44.537	39.0022	43.741	1
ENSMUSG00000030064	Frmd4b	890.079	1.7278	0.280164	37.2844	8.01296e-09	2.76413e-07	512.142	385.167	606.68	857.074	798.153	722.39	1934.22	1304.8	2
ENSMUSG00000017670	Elmo2	877.024	1.96009	0.329533	37.2466	8.16589e-09	2.81202e-07	453.649	486.46	471.736	490.166	822.636	734.86	2056.29	1500.4	2
ENSMUSG00000056515	Rab31	655.635	2.04725	0.331752	37.1859	8.41758e-09	2.89371e-07	292.467	235.102	257.414	729.038	875.52	419.538	1297.91	1138.09	2
ENSMUSG00000026834	Acvr1c	769.803	-1.92754	0.543722	37.1455	8.58907e-09	2.94759e-07	1606.62	1343.08	1571.7	490.166	60.7184	208.433	592.979	284.729	1
ENSMUSG00000057135	Scimp	99.701	8.44756	1.47888	37.1284	8.66289e-09	2.96782e-07	0	0	2.26796	19.1098	311.427	230.701	152.398	81.705	3
ENSMUSG00000034858	Fam214a	1614.8	-0.988792	0.230953	37.0936	8.81518e-09	3.01482e-07	2455.42	2304.75	2456.2	1064.41	928.404	1440.33	1127.45	1141.39	1
ENSMUSG00000090150	Acad11	2417.26	-1.72752	0.288687	37.0826	8.86371e-09	3.02495e-07	3559	4073.01	3403.08	1598.53	1862.68	2745.26	1079.78	1016.77	1
ENSMUSG00000117975		282.437	1.1011	0.387602	37.08	8.87508e-09	3.02495e-07	93.5895	95.0411	161.025	611.513	418.173	413.303	239.069	227.784	3
ENSMUSG00000020709	Adap2	553.733	3.05056	0.505421	37.0435	9.0388e-09	3.0755e-07	135.185	108.797	179.169	277.092	878.458	872.925	1157.07	821.176	3
ENSMUSG00000039960	Rhou	1626.98	-0.447749	0.186457	37.0306	9.09725e-09	3.09013e-07	1574.12	1315.57	1355.11	2623.77	1957.68	2033.56	1253.13	902.881	3
ENSMUSG00000062515	Fabp4	34444.7	-1.79746	0.296549	36.9863	9.30087e-09	3.15393e-07	53375.9	50266.7	54087.5	30948.3	20255.5	36604.9	20176.4	9842.56	1
ENSMUSG00000022878	Adipoq	5948.93	-1.88752	0.295261	36.9603	9.42252e-09	3.18976e-07	9126.27	7670.82	9412.04	5208.37	5319.71	6167.48	3142.57	1544.14	1
ENSMUSG00000097636	Mirt1	262.909	1.52998	0.673054	36.9172	9.6281e-09	3.25384e-07	20.7977	32.5141	68.0389	1108.37	305.551	339.372	138.675	89.958	3
ENSMUSG00000057003	Myh4	848604	-1.03892	0.190677	36.8971	9.72517e-09	3.28109e-07	1.09338e+06	1.4261e+06	969474	593826	839410	658565	472478	735599	1
ENSMUSG00000074771	Ankef1	550.261	-1.44438	0.377185	36.8694	9.86059e-09	3.31939e-07	972.29	836.612	979.76	436.659	152.775	228.92	582.145	212.928	1
ENSMUSG00000038775	Vill	124.929	1.8749	0.35286	36.8671	9.8719e-09	3.31939e-07	59.7933	43.7689	32.8854	212.119	152.775	97.9813	255.681	144.428	2
ENSMUSG00000049281	Scn3b	210.882	0.771166	0.386334	36.8522	9.94593e-09	3.33866e-07	90.9897	81.2852	89.5845	359.264	502.396	228.029	153.12	182.392	3
ENSMUSG00000043613	Mmp3	532.706	1.95938	0.396838	36.8303	1.00556e-08	3.36982e-07	167.681	187.581	167.829	582.848	1155.61	549.586	841.437	609.073	3
ENSMUSG00000070867	Trabd2b	192.47	-1.61794	0.297848	36.8251	1.00818e-08	3.37293e-07	267.77	348.901	307.309	138.546	132.209	147.863	98.9501	98.211	1
ENSMUSG00000024053	Emilin2	1948.16	1.89258	0.357524	36.8121	1.01475e-08	3.38923e-07	701.921	597.759	861.825	2577.91	3468.78	1834.03	2913.61	2629.41	3
ENSMUSG00000006585	Cdt1	106.846	3.10812	0.544731	36.7251	1.05985e-08	3.53395e-07	20.7977	12.5054	26.0816	188.231	157.672	90.8554	170.454	188.169	2
ENSMUSG00000024924	Vldlr	6574.18	-1.31393	0.21599	36.6063	1.12471e-08	3.74396e-07	8891	9390.31	9008.34	6546.06	5418.63	6000.91	3317.36	4020.87	1
ENSMUSG00000022671	Mzt2	284.226	0.149317	0.302649	36.5829	1.13797e-08	3.78181e-07	194.978	172.575	132.676	430.926	599.349	326.901	216.679	199.723	3
ENSMUSG00000031907	Zfp90	154.863	1.93301	0.326085	36.5638	1.14889e-08	3.81175e-07	68.8922	57.5249	91.8525	166.255	158.651	188.837	288.183	218.705	2
ENSMUSG00000032845	Alpk2	3272.58	-1.73445	0.344338	36.5556	1.15357e-08	3.82094e-07	3746.18	2817.47	3213.7	3876.42	6330.38	4045.74	763.433	1387.33	3
ENSMUSG00000053338	Tarm1	164.926	0.824929	0.726309	36.5417	1.16163e-08	3.84126e-07	28.5968	36.2657	14.7418	153.834	646.357	342.935	68.6151	28.0603	3
ENSMUSG00000047735	Samd9l	3572.75	3.3558	0.644456	36.5065	1.18228e-08	3.90308e-07	519.941	411.428	419.573	1523.05	8567.17	8745.28	5162.02	3233.54	3
ENSMUSG00000042401	Crtac1	38.3863	-1.95221	0.567281	36.4955	1.18881e-08	3.91817e-07	84.4905	62.527	91.8525	10.5104	5.87597	16.0333	20.9457	14.8554	1
ENSMUSG00000029826	Zc3hav1	2718.49	1.75801	0.446875	36.4893	1.19246e-08	3.92374e-07	807.209	819.104	841.414	2143.16	5842.67	6273.48	2911.45	2109.47	3
ENSMUSG00000042659	Arrdc4	485.999	0.553191	0.244403	36.4832	1.19609e-08	3.92921e-07	292.467	312.635	285.763	612.469	758	766.927	441.303	418.428	3
ENSMUSG00000043895	S1pr2	305.962	2.3859	0.382738	36.443	1.22039e-08	4.00244e-07	96.1892	117.551	147.418	252.249	367.248	235.155	696.262	535.621	2
ENSMUSG00000059201	Lep	2168.08	-2.85662	0.436232	36.3863	1.25547e-08	4.11075e-07	2998.76	1810.78	4285.31	2482.36	2620.68	2343.54	600.201	203.024	1
ENSMUSG00000031387	Renbp	196.496	2.48578	0.414427	36.3406	1.28451e-08	4.19895e-07	83.1906	67.5292	85.0486	108.926	204.68	120.25	478.139	424.206	2
ENSMUSG00000021701	Plk2	607.961	1.68184	0.298221	36.2997	1.31104e-08	4.27866e-07	293.767	242.605	334.524	576.16	885.313	721.499	821.936	987.887	3
ENSMUSG00000068335	Dok1	293.948	2.56371	0.470886	36.2839	1.32142e-08	4.3055e-07	72.7918	92.54	79.3787	228.362	487.706	502.377	552.532	335.898	3
ENSMUSG00000020250	Txnrd1	4074.71	-0.733264	0.233655	36.2566	1.33961e-08	4.35764e-07	3818.97	3440.24	3542.56	4775.53	6598.72	6082.86	1936.39	2402.46	3
ENSMUSG00000048142	Nat8l	820.322	-2.65603	0.513059	36.2532	1.34187e-08	4.35792e-07	1498.73	2202.2	1191.81	314.356	315.344	502.377	390.022	147.729	1
ENSMUSG00000066258	Trim12a	394.137	2.198	0.465991	36.2285	1.35855e-08	4.40492e-07	101.389	98.7927	138.346	304.801	804.029	819.48	521.474	364.784	3
ENSMUSG00000001128	Cfp	496.989	1.88486	0.308121	36.2252	1.36082e-08	4.40512e-07	285.968	181.328	255.146	524.564	517.086	378.564	929.554	903.706	2
ENSMUSG00000019979	Apaf1	851.658	2.36157	0.455289	36.2191	1.36494e-08	4.4113e-07	235.273	250.108	251.744	614.379	1643.31	1491.99	1394.69	931.767	3
ENSMUSG00000057346	Apol9a	213.595	5.47556	0.905879	36.1798	1.39206e-08	4.49169e-07	10.3988	6.2527	13.6078	49.6854	447.553	495.251	496.195	189.82	3
ENSMUSG00000054013	Tmem179	83.2233	-3.20581	0.571283	36.161	1.40518e-08	4.52672e-07	146.883	217.594	136.078	67.8397	25.4625	31.1759	20.9457	19.8073	1
ENSMUSG00000069094	Pde7a	1933.77	-1.17847	0.283236	36.1527	1.41102e-08	4.53821e-07	3391.32	2636.14	3188.75	1401.7	786.401	1581.06	1256.74	1228.05	1
ENSMUSG00000029335	Bmp3	284.727	-0.63374	0.330332	36.086	1.45891e-08	4.67719e-07	449.749	380.164	491.014	172.944	74.429	163.005	351.742	194.771	1
ENSMUSG00000057948	Unc13d	155.192	3.05031	0.487739	36.0888	1.45685e-08	4.67719e-07	31.1965	37.5162	43.0913	164.344	187.052	99.7628	438.414	240.163	2
ENSMUSG00000037110	Ralgapa2	2122.22	-1.09369	0.252163	36.0245	1.50447e-08	4.8155e-07	3136.55	3612.81	2830.42	1525.92	1368.12	1360.16	1861.27	1282.52	1
ENSMUSG00000031489	Adrb3	847.897	-1.30526	0.451445	35.9841	1.53515e-08	4.90586e-07	1567.62	1665.72	1217.9	399.394	169.424	343.825	1077.62	341.675	1
ENSMUSG00000053063	Clec12a	226.525	4.49029	0.670527	35.9477	1.56333e-08	4.98792e-07	25.9971	15.0065	44.2253	114.659	283.026	99.7628	759.099	470.422	2
ENSMUSG00000036918	Ttc7	840.861	1.48707	0.273579	35.9154	1.58878e-08	5.06103e-07	396.455	396.421	469.468	1256.47	960.721	838.186	1254.57	1154.6	2
ENSMUSG00000032231	Anxa2	4320.17	1.64217	0.295895	35.8842	1.61381e-08	5.13258e-07	2044.67	1928.33	2155.7	4117.2	6864.11	4499.12	6832.62	6119.62	3
ENSMUSG00000042349	Ikbke	463.278	2.98276	0.512997	35.8587	1.63445e-08	5.18996e-07	107.888	93.7906	133.81	288.558	830.471	650.24	1009.72	591.742	3
ENSMUSG00000011305	Plin5	975.924	-1.67786	0.288297	35.7986	1.68432e-08	5.33982e-07	1454.54	1339.33	1656.75	577.115	710.993	1262.18	397.967	408.525	1
ENSMUSG00000030403	Vasp	946.291	1.14152	0.294489	35.7936	1.68855e-08	5.34477e-07	439.35	456.447	437.717	1756.19	1408.27	882.723	1167.9	1021.72	3
ENSMUSG00000024725	Ostf1	1049.35	1.26724	0.22376	35.7355	1.73832e-08	5.49358e-07	600.532	626.521	590.804	1337.68	1206.53	931.713	1611.37	1489.67	2
ENSMUSG00000040522	Tlr8	312.332	3.91007	0.653571	35.7012	1.76838e-08	5.57975e-07	44.195	17.5076	70.3068	185.365	651.254	462.294	614.647	453.091	3
ENSMUSG00000111422	AC153536.3	122.699	-2.05216	0.364393	35.6504	1.8139e-08	5.71434e-07	239.173	191.333	184.839	81.2166	100.871	80.1665	46.2249	57.7712	1
ENSMUSG00000033610	Pank1	889.87	-1.7931	0.433944	35.5947	1.8651e-08	5.86639e-07	1541.63	1655.72	1703.24	269.448	262.46	905.882	348.131	432.459	1
ENSMUSG00000040274	Cdk6	585.146	1.48038	0.25568	35.5797	1.87914e-08	5.90126e-07	261.271	366.408	322.051	594.314	787.38	534.444	881.884	933.417	2
ENSMUSG00000024066	Xdh	12123.4	1.24248	0.405198	35.4967	1.95882e-08	6.14185e-07	4387.01	4869.61	4499.64	14734.6	20538.5	27051.8	14379.6	6526.49	3
ENSMUSG00000031490	Eif4ebp1	2260.79	-0.895582	0.232976	35.49	1.96539e-08	6.15278e-07	2181.15	2009.62	2227.14	3795.2	2916.44	2581.36	1207.63	1167.8	3
ENSMUSG00000028859	Csf3r	2916.66	2.16401	0.620446	35.4255	2.02981e-08	6.34451e-07	419.853	245.106	682.657	12085	3695.99	2396.09	1916.17	1892.42	3
ENSMUSG00000027313	Chac1	1996.53	-1.62336	0.28657	35.3794	2.07708e-08	6.48211e-07	3052.06	3043.82	3048.14	1488.65	1188.9	2330.17	990.224	830.254	1
ENSMUSG00000110344	Gm45716	132.766	-1.58179	0.35708	35.3688	2.0882e-08	6.50664e-07	227.474	198.836	260.816	91.727	47.9871	93.5276	82.3381	59.4218	1
ENSMUSG00000022500	Litaf	1923.45	1.0557	0.322246	35.3465	2.11158e-08	6.56924e-07	912.497	897.888	942.338	2351.46	3599.03	2871.74	2304.02	1508.65	3
ENSMUSG00000026786	Apbb1ip	799.62	2.62627	0.423383	35.3251	2.13424e-08	6.62941e-07	243.073	173.825	275.557	1377.82	758.98	466.747	1727.66	1373.3	2
ENSMUSG00000044966	Fbxo48	21.6515	6.76295	1.47593	35.3199	2.13979e-08	6.63635e-07	0	0	0	25.7982	57.7804	41.8647	23.8347	23.9338	3
ENSMUSG00000031207	Msn	6065.01	1.75576	0.347884	35.309	2.15158e-08	6.66254e-07	2699.8	2217.21	2635.37	5340.23	10437.7	8723.01	9080.3	7386.46	3
ENSMUSG00000040322	Slc25a24	362.82	1.94488	0.330095	35.279	2.18402e-08	6.75255e-07	181.979	167.572	205.251	293.335	349.62	209.324	792.323	703.158	2
ENSMUSG00000036438	Calm2	2076.32	0.746867	0.177947	35.2617	2.20301e-08	6.80074e-07	1928.98	1922.08	1722.52	1498.21	1662.9	1416.28	3240.08	3219.51	2
ENSMUSG00000031808	Slc27a1	5923.12	-1.14864	0.244981	35.243	2.22377e-08	6.85423e-07	8068.19	10004.3	8494.65	4735.4	3705.78	4266.64	4485.26	3624.73	1
ENSMUSG00000001123	Lgals9	2307.89	3.37234	0.609629	35.19	2.28346e-08	7.02735e-07	310.665	326.391	534.105	999.442	5280.54	4769.91	4070.68	2171.37	3
ENSMUSG00000054200	Ffar4	55.4135	-3.1279	0.755307	35.1651	2.31209e-08	7.09362e-07	114.387	212.592	56.699	13.3768	3.91731	8.90739	20.2234	13.2048	1
ENSMUSG00000070691	Runx3	85.6107	3.18036	0.559737	35.166	2.31096e-08	7.09362e-07	12.9985	20.0087	19.2777	81.2166	144.941	96.1998	191.4	118.844	3
ENSMUSG00000020387	Jade2	859.489	-0.110557	0.196711	35.093	2.39688e-08	7.34248e-07	700.621	615.266	714.408	1290.87	1111.54	1203.39	686.873	552.953	3
ENSMUSG00000103560	Gm38070	146.865	-1.77511	0.328458	35.0581	2.43916e-08	7.46054e-07	166.381	172.575	168.963	192.053	166.486	211.996	52.7253	43.741	3
ENSMUSG00000072812	Ahnak2	418.444	1.27861	0.330565	34.9519	2.57213e-08	7.85523e-07	354.86	322.64	317.515	324.866	155.713	177.257	876.828	817.875	2
ENSMUSG00000033849	B3galt2	932.319	-1.01444	0.337209	34.9379	2.59019e-08	7.8983e-07	1765.2	1025.44	1681.69	760.569	339.827	303.742	1018.39	563.682	1
ENSMUSG00000024747	Aldh1a7	323.828	-2.41472	0.438732	34.8507	2.70555e-08	8.23016e-07	406.854	568.996	861.825	177.721	200.762	166.568	133.619	74.2772	1
ENSMUSG00000069910	Spdl1	47.6931	4.60707	0.769846	34.8495	2.70726e-08	8.23016e-07	2.59971	5.00216	4.53592	53.5074	44.0698	17.8148	163.232	90.7833	2
ENSMUSG00000047945	Marcksl1	1001.91	1.2563	0.497252	34.8075	2.76466e-08	8.39187e-07	272.969	252.609	356.07	834.142	2981.08	2052.26	716.486	549.652	3
ENSMUSG00000046841	Ckap4	716.997	1.94261	0.325968	34.7909	2.78779e-08	8.44925e-07	323.664	285.123	301.639	906.759	834.388	480.999	1113.73	1489.67	2
ENSMUSG00000027248	Pdia3	3660.34	1.50771	0.260291	34.7488	2.84701e-08	8.61566e-07	1922.48	2084.65	2041.17	3372.88	4694.9	3549.6	6467.15	5149.89	2
ENSMUSG00000026341	Actr3	3825.56	1.89367	0.351937	34.729	2.87535e-08	8.68824e-07	1509.13	1640.71	1553.55	3000.24	6740.72	4647.88	6252.64	5259.65	3
ENSMUSG00000020790	Ankfy1	2459.96	1.80505	0.354793	34.7069	2.90733e-08	8.77161e-07	946.293	1107.98	1026.25	2019.9	3836.03	4084.04	3813.55	2845.64	3
ENSMUSG00000036067	Slc2a6	213.742	1.66593	0.533399	34.6593	2.97741e-08	8.9695e-07	45.4949	35.0151	102.058	313.4	538.631	358.077	182.733	134.524	3
ENSMUSG00000031591	Asah1	1024.99	1.12747	0.201204	34.5932	3.07744e-08	9.2569e-07	820.208	687.797	740.49	900.071	894.127	818.589	1814.33	1524.33	2
ENSMUSG00000112023	Lilr4b	2945.27	3.43526	0.606019	34.4666	3.27849e-08	9.84682e-07	447.15	367.659	662.245	1394.06	7182.4	4362.84	5682.05	3463.79	3
ENSMUSG00000020571	Pdia6	2446.63	1.46615	0.25099	34.4464	3.31171e-08	9.93165e-07	1336.25	1416.86	1522.94	2168.96	2930.15	2425.48	4271.47	3500.93	2
ENSMUSG00000071984	Fndc1	1742.6	-0.0419307	0.280464	34.4415	3.31986e-08	9.94118e-07	2485.32	2168.44	2241.88	942.112	739.393	1008.32	1820.83	2534.5	1
ENSMUSG00000090307	1700071M16Rik	108.742	1.89067	0.499106	34.3449	3.4841e-08	1.04173e-06	32.4963	18.7581	34.0194	317.222	126.333	121.141	130.007	89.958	3
ENSMUSG00000029994	Anxa4	1368.75	1.98276	0.335802	34.34	3.49276e-08	1.04276e-06	631.729	615.266	708.738	972.688	1676.61	1362.83	2911.45	2070.68	2
ENSMUSG00000021732	Fgf10	265.751	-0.941568	0.288901	34.3157	3.53538e-08	1.05234e-06	421.153	315.136	513.693	188.231	114.581	158.552	269.404	145.253	1
ENSMUSG00000041673	Lrrc18	31.3762	4.60926	0.911024	34.3175	3.53223e-08	1.05234e-06	3.89956	0	3.40194	47.7745	42.1111	46.3184	50.5585	56.9459	2
ENSMUSG00000048234	Rnf149	591.134	1.02289	0.327975	34.3025	3.55883e-08	1.05774e-06	274.269	242.605	329.988	932.557	1039.07	745.549	696.262	468.772	3
ENSMUSG00000029371	Cxcl5	666.485	1.49205	0.711808	34.2766	3.60512e-08	1.06991e-06	72.7918	98.7927	92.9864	342.065	2733.31	1573.05	280.238	138.651	3
ENSMUSG00000040033	Stat2	3378.67	3.13723	0.629289	34.1767	3.78984e-08	1.12306e-06	505.643	568.996	469.468	1571.78	8042.25	7831.38	5294.92	2744.96	3
ENSMUSG00000036611	Eepd1	2086.74	-0.756529	0.21588	34.1684	3.8057e-08	1.12609e-06	3139.15	3025.06	2683	1244.05	1569.86	1491.99	1681.43	1859.41	1
ENSMUSG00000032942	Ucp3	3793.99	-1.1301	0.308835	34.1541	3.83298e-08	1.13249e-06	5621.87	6007.6	6718.84	1595.67	1751.04	3868.48	2151.62	2636.84	1
ENSMUSG00000026029	Casp8	820.343	2.51246	0.505284	34.0624	4.0127e-08	1.18384e-06	184.579	253.86	187.107	529.341	1691.3	1561.47	1294.3	860.791	3
ENSMUSG00000031431	Tsc22d3	7546.56	-0.606492	0.169757	34.0045	4.13066e-08	1.21684e-06	6495.37	7980.95	7512.62	9212.83	9965.65	9668.98	4462.15	5073.96	3
ENSMUSG00000048330	Ric3	105.27	-1.87655	0.363568	33.989	4.16276e-08	1.22449e-06	178.08	201.337	151.953	71.6617	74.429	62.3518	57.7811	44.5663	1
ENSMUSG00000087107	AI662270	103.111	3.0345	0.537411	33.9234	4.30152e-08	1.26345e-06	16.8981	30.013	29.4835	79.3056	154.734	152.316	221.013	141.127	3
ENSMUSG00000020423	Btg2	2510.76	-1.17331	0.295817	33.8961	4.36063e-08	1.27893e-06	2599.71	1852.05	2650.11	3007.88	4134.73	3810.58	885.495	1145.52	3
ENSMUSG00000031523	Dlc1	4109.87	-0.967041	0.206321	33.8858	4.3833e-08	1.28243e-06	6061.22	5484.87	5826.39	3525.75	2616.77	3469.43	3515.98	2378.52	1
ENSMUSG00000078153	Psme2b	138.619	3.61345	0.703647	33.8848	4.38541e-08	1.28243e-06	16.8981	17.5076	17.0097	69.7507	283.026	352.733	222.457	129.573	3
ENSMUSG00000021338	Carmil1	296.044	0.796952	0.328623	33.8379	4.48948e-08	1.31094e-06	144.284	148.814	153.087	443.347	371.166	619.955	301.184	186.518	3
ENSMUSG00000027230	Creb3l1	371.11	1.27439	0.348448	33.7979	4.58017e-08	1.33547e-06	145.584	192.583	158.757	446.213	609.142	643.114	455.748	317.741	3
ENSMUSG00000038068	Rnf144b	932.26	0.845975	0.238642	33.7842	4.61169e-08	1.34075e-06	877.401	751.575	1065.94	497.81	601.308	758.91	1590.42	1314.71	2
ENSMUSG00000030341	Tnfrsf1a	2548.48	0.323678	0.285295	33.7857	4.60818e-08	1.34075e-06	1644.31	1426.87	1554.69	3474.16	4660.62	3691.22	2330.75	1605.21	3
ENSMUSG00000020422	Tns3	1309.9	1.28429	0.247879	33.7503	4.69044e-08	1.36166e-06	756.515	705.305	720.078	1304.24	1932.22	1424.29	1750.77	1885.82	3
ENSMUSG00000023070	Rgn	53.1141	1.83407	1.01319	33.736	4.72405e-08	1.36943e-06	0	5.00216	392.357	0	0	7.12591	7.22264	13.2048	1
ENSMUSG00000086513	9130208D14Rik	149.466	2.54391	0.593277	33.7225	4.75603e-08	1.3767e-06	38.9956	15.0065	34.0194	139.501	339.827	317.103	166.843	144.428	3
ENSMUSG00000015745	Plekho1	559.811	2.54025	0.434299	33.6705	4.88128e-08	1.41091e-06	214.476	187.581	206.385	285.691	738.414	565.619	1266.85	1013.47	2
ENSMUSG00000046722	Cdc42se1	1279.03	0.917772	0.250334	33.608	5.03642e-08	1.45365e-06	691.522	744.072	708.738	1981.68	1862.68	1350.36	1616.43	1276.74	3
ENSMUSG00000033880	Lgals3bp	2338.89	3.09578	0.538451	33.5978	5.06213e-08	1.45896e-06	560.237	495.214	624.823	1018.55	4013.29	3454.29	5227.02	3317.72	3
ENSMUSG00000023067	Cdkn1a	2154.69	0.47896	0.344883	33.5878	5.08754e-08	1.46417e-06	989.189	934.154	1516.13	3343.26	4509.81	2879.76	1578.87	1486.37	3
ENSMUSG00000022575	Gsdmd	543.018	2.46594	0.467776	33.5669	5.14093e-08	1.47741e-06	155.982	181.328	137.212	393.662	1001.85	758.019	1056.67	659.417	3
ENSMUSG00000037206	Islr	483.247	0.0697454	0.249294	33.531	5.23409e-08	1.50149e-06	626.529	517.724	714.408	277.092	211.535	357.186	570.588	590.917	1
ENSMUSG00000036948	BC037034	304.646	1.63809	0.338318	33.5259	5.24729e-08	1.50149e-06	122.186	111.298	153.087	521.697	384.876	319.775	475.972	348.278	2
ENSMUSG00000051735	Rinl	174.003	2.46192	0.438408	33.5273	5.24363e-08	1.50149e-06	57.1936	37.5162	48.7612	285.691	235.039	105.998	361.854	259.97	2
ENSMUSG00000031545	Gpat4	1759.31	-0.902911	0.190109	33.5096	5.29033e-08	1.51048e-06	2367.03	2583.62	2297.45	1450.43	1370.08	1378.86	1376.63	1250.33	1
ENSMUSG00000072109	A530040E14Rik	101.823	5.54936	1.03604	33.5083	5.29384e-08	1.51048e-06	2.59971	3.75162	5.6699	22.9317	237.977	323.338	147.342	70.976	3
ENSMUSG00000039005	Tlr4	1119.33	1.51256	0.313178	33.4916	5.33825e-08	1.52098e-06	523.841	456.447	629.359	1088.3	1805.88	1583.73	1556.48	1310.58	3
ENSMUSG00000049988	Lrrc25	297.224	4.01919	0.618539	33.4794	5.37091e-08	1.52811e-06	51.9941	17.5076	57.833	338.243	317.302	110.452	898.496	585.965	2
ENSMUSG00000021384	Susd3	53.6166	3.55294	0.611191	33.4668	5.40483e-08	1.53557e-06	15.5982	6.2527	11.3398	56.3739	28.4005	16.924	171.899	122.145	2
ENSMUSG00000029605	Oas1b	372.051	3.08065	0.699906	33.4597	5.42393e-08	1.53881e-06	61.0931	28.7624	40.8233	198.742	901.962	1075.12	412.413	257.494	3
ENSMUSG00000003882	Il7r	374.035	3.97743	0.678459	33.4522	5.44447e-08	1.54244e-06	55.8937	55.0238	34.0194	111.792	806.967	355.405	895.607	677.573	3
ENSMUSG00000075324	Fign	114.287	-0.296129	0.326617	33.4459	5.46164e-08	1.54512e-06	193.678	171.324	109.996	60.1958	49.9458	35.6296	146.62	146.904	1
ENSMUSG00000039167	Adgrl4	822.111	-0.753563	0.231769	33.4407	5.47583e-08	1.54694e-06	1282.96	1032.95	1279.13	494.943	483.788	686.76	653.649	662.718	1
ENSMUSG00000025351	Cd63	3114.84	1.07945	0.211214	33.437	5.48591e-08	1.5476e-06	1922.48	1829.54	1984.47	3551.55	4158.23	3194.19	3994.12	4284.15	2
ENSMUSG00000042622	Maff	433.896	-1.6957	0.285111	33.4094	5.5621e-08	1.56688e-06	540.739	538.983	650.905	319.133	489.664	610.156	152.398	169.187	1
ENSMUSG00000034765	Dusp5	272.131	1.44366	0.487107	33.3901	5.61606e-08	1.57985e-06	83.1906	81.2852	77.1107	234.095	764.856	505.049	221.013	210.452	3
ENSMUSG00000001168	Oas1h	19.8542	6.41609	1.49311	33.3558	5.71331e-08	1.60495e-06	0	0	0	30.5757	53.8631	33.8481	22.3902	18.1567	3
ENSMUSG00000019326	Aoc3	3624.27	-1.78261	0.333577	33.3186	5.82053e-08	1.63277e-06	6321.19	4909.62	6543.07	2218.65	2372.91	3312.66	2308.36	1007.69	1
ENSMUSG00000017631	Abr	1299.84	1.64756	0.324181	33.2644	5.98047e-08	1.67529e-06	538.139	475.206	751.829	1658.73	2009.58	1385.1	1856.94	1723.23	3
ENSMUSG00000011179	Odc1	2167.8	0.619778	0.25277	33.2592	5.99582e-08	1.67723e-06	1245.26	1244.29	1386.86	2783.34	3966.28	2643.71	1927.72	2144.96	3
ENSMUSG00000018428	Akap1	2461.81	-0.942322	0.189413	33.2503	6.02282e-08	1.68243e-06	3366.62	3328.94	3467.71	1834.54	1965.51	2343.54	1644.59	1743.04	1
ENSMUSG00000054619	Mettl7a1	1795.4	-1.48201	0.258668	33.2408	6.05149e-08	1.68808e-06	2724.49	2617.38	2424.45	1655.86	1424.92	1589.08	1221.35	705.634	1
ENSMUSG00000028841	Cnksr1	2368.04	0.227546	0.286133	33.2331	6.07483e-08	1.69223e-06	1528.63	1233.03	1617.06	4225.17	4043.65	2736.35	1804.21	1756.24	3
ENSMUSG00000052160	Pld4	749.251	4.59091	0.728488	33.2236	6.1037e-08	1.6979e-06	100.089	57.5249	134.944	121.347	919.59	411.522	2543.09	1705.9	2
ENSMUSG00000031880	Rrad	2175.61	0.765209	0.599219	33.1687	6.27348e-08	1.7427e-06	721.419	292.627	526.167	3634.68	8250.84	1844.72	1265.41	869.044	3
ENSMUSG00000019876	Pkib	58.8818	4.53328	0.802004	33.07	6.59078e-08	1.8283e-06	5.19941	6.2527	7.93787	21.0208	100.871	98.8721	128.563	102.338	3
ENSMUSG00000102051	I830127L07Rik	108.117	7.55783	1.37192	33.0419	6.68406e-08	1.85161e-06	1.29985	2.50108	0	12.4214	342.765	155.879	213.068	137	3
ENSMUSG00000039976	Tbc1d16	994.448	-0.838937	0.196769	33.0328	6.71457e-08	1.85491e-06	1189.37	1633.21	1327.89	655.466	822.636	790.086	686.873	850.062	1
ENSMUSG00000002204	Napsa	178.267	3.90525	0.742279	33.0342	6.71004e-08	1.85491e-06	18.1979	6.2527	31.7515	124.214	503.375	281.474	252.07	208.802	3
ENSMUSG00000112148	Lilrb4a	1547.95	2.88063	0.560878	33.0246	6.74226e-08	1.85999e-06	321.064	267.616	373.08	935.424	3757.68	2354.22	2762.66	1611.82	3
ENSMUSG00000059108	Ifitm6	188.145	3.32956	0.788327	32.9501	6.99804e-08	1.92789e-06	23.3974	5.00216	22.6796	142.368	615.018	384.799	185.622	126.271	3
ENSMUSG00000057143	Trim12c	758.642	1.86462	0.444238	32.9186	7.10916e-08	1.9558e-06	246.972	305.132	190.509	686.997	1459.2	1418.95	1051.62	709.76	3
ENSMUSG00000087684	1200007C13Rik	61.2124	-0.858128	0.652419	32.9121	7.13226e-08	1.95946e-06	27.2969	31.2635	15.8757	98.4154	189.01	97.0906	21.6679	9.07833	3
ENSMUSG00000029471	Camkk2	1358.39	1.29586	0.309712	32.855	7.33867e-08	2.0134e-06	657.726	684.046	658.843	1470.5	2046.8	2174.29	1897.39	1277.57	3
ENSMUSG00000055805	Fmnl1	1208.51	2.33238	0.456811	32.8448	7.37643e-08	2.02098e-06	297.666	253.86	385.554	2601.8	1782.38	834.623	1911.11	1601.09	2
ENSMUSG00000081723	Gm15931	76.9902	5.05274	0.874874	32.8153	7.4858e-08	2.04813e-06	11.6987	5.00216	2.26796	21.9762	73.4496	63.2425	283.127	155.157	2
ENSMUSG00000055782	Abcd2	2133.88	-0.973234	0.202428	32.8104	7.50449e-08	2.05044e-06	3198.94	2514.84	3228.44	2019.9	1420.03	1643.41	1867.77	1177.71	1
ENSMUSG00000074417	Gm14548	236.454	5.06839	0.758707	32.7998	7.54432e-08	2.05851e-06	10.3988	8.75379	36.2874	304.801	315.344	105.998	694.096	415.953	2
ENSMUSG00000074417	Gm14548	236.454	5.06839	0.758707	32.7998	7.54432e-08	2.05851e-06	10.3988	8.75379	36.2874	304.801	315.344	105.998	694.096	415.953	2
ENSMUSG00000074417	Gm14548	236.454	5.06839	0.758707	32.7998	7.54432e-08	2.05851e-06	10.3988	8.75379	36.2874	304.801	315.344	105.998	694.096	415.953	2
ENSMUSG00000074417	Gm14548	236.454	5.06839	0.758707	32.7998	7.54432e-08	2.05851e-06	10.3988	8.75379	36.2874	304.801	315.344	105.998	694.096	415.953	2
ENSMUSG00000074417	Gm14548	236.454	5.06839	0.758707	32.7998	7.54432e-08	2.05851e-06	10.3988	8.75379	36.2874	304.801	315.344	105.998	694.096	415.953	2
ENSMUSG00000032812	Arap1	1686.44	1.86047	0.323227	32.7256	7.8294e-08	2.13338e-06	726.618	701.553	833.476	2036.15	2047.78	1276.43	3534.76	2334.78	2
ENSMUSG00000047045	Tmem164	540.084	1.6195	0.294486	32.6986	7.93571e-08	2.1594e-06	256.071	266.365	230.198	800.7	620.894	383.018	973.612	789.815	2
ENSMUSG00000078606	Gm4070	494.368	2.94087	0.629249	32.6227	8.24273e-08	2.23989e-06	84.4905	76.283	82.7806	255.116	1176.17	1179.34	701.318	399.446	3
ENSMUSG00000105506	Gm43743	37.9578	-1.72003	0.576161	32.6133	8.28138e-08	2.24249e-06	59.7933	52.5227	124.738	7.64391	5.87597	20.487	14.4453	18.1567	1
ENSMUSG00000030087	Klf15	1084.4	-1.31658	0.240279	32.6132	8.28182e-08	2.24249e-06	1481.83	1354.34	1856.33	1044.35	627.75	1172.21	657.26	481.151	1
ENSMUSG00000032815	Fanca	96.2152	2.01436	0.439841	32.6122	8.28599e-08	2.24249e-06	25.9971	36.2657	29.4835	174.855	117.519	122.922	154.564	108.115	2
ENSMUSG00000024338	Psmb8	878.701	3.28796	0.621196	32.6083	8.30219e-08	2.24384e-06	129.985	227.598	104.326	453.857	1782.38	1649.65	1755.82	925.99	3
ENSMUSG00000062980	Cped1	2880.65	-1.12974	0.245846	32.5714	8.45686e-08	2.28255e-06	4618.38	3861.67	4374.9	2038.06	1688.36	2845.91	1789.05	1828.87	1
ENSMUSG00000026928	Card9	137.879	2.61259	0.462776	32.5405	8.58868e-08	2.315e-06	36.3959	32.5141	45.3592	255.116	126.333	105.998	286.739	214.579	2
ENSMUSG00000026749	Nek6	1051.76	0.304995	0.24795	32.4879	8.81734e-08	2.37343e-06	796.81	548.987	739.356	1601.4	1598.26	1405.59	968.556	755.152	3
ENSMUSG00000034641	Cd300ld	245.713	2.97056	0.490238	32.4737	8.8802e-08	2.38478e-06	68.8922	40.0173	64.6369	422.326	214.473	108.67	600.201	446.489	2
ENSMUSG00000027422	Rrbp1	3826.22	1.1739	0.250183	32.473	8.88338e-08	2.38478e-06	2205.85	1963.35	2432.39	4039.81	5360.84	5069.2	5285.53	4252.78	3
ENSMUSG00000030956	Fam53b	1018.79	0.108987	0.205862	32.4541	8.96762e-08	2.40416e-06	1220.56	1256.79	1106.77	714.706	582.701	627.08	1377.36	1264.36	1
ENSMUSG00000010142	Tnfrsf13b	90.2421	4.40085	0.761415	32.3525	9.43509e-08	2.52281e-06	20.7977	5.00216	5.6699	40.1305	108.705	68.5869	247.736	225.308	2
ENSMUSG00000061288	Taok3	767.113	2.02079	0.36621	32.3524	9.43543e-08	2.52281e-06	313.265	258.862	427.511	577.115	1139.94	1007.43	1292.85	1119.94	3
ENSMUSG00000079491	H2-T10	175.54	3.64202	0.648035	32.3261	9.56064e-08	2.55287e-06	23.3974	30.013	35.1534	92.6824	326.116	270.785	429.747	196.422	3
ENSMUSG00000028996	Rbp7	253.13	-1.88	0.483014	32.3207	9.58638e-08	2.55632e-06	417.253	443.942	582.866	164.344	42.1111	133.611	139.397	101.512	1
ENSMUSG00000036246	Gmip	542.681	2.06323	0.368032	32.3154	9.61187e-08	2.5597e-06	179.38	215.093	222.26	762.48	636.564	429.336	1198.96	697.381	2
ENSMUSG00000038174	Fam126b	1502.25	-0.977953	0.26106	32.3118	9.62891e-08	2.56083e-06	2121.36	2353.52	2296.31	1015.68	854.954	1118.77	1363.63	893.803	1
ENSMUSG00000020290	Xpo1	1629.69	0.927185	0.183721	32.1997	1.01842e-07	2.70489e-06	1344.05	1295.56	1298.41	1477.19	1268.23	1267.52	2734.49	2352.11	2
ENSMUSG00000051985	Igfn1	987.12	-1.74786	0.363447	32.1931	1.0218e-07	2.71029e-06	1624.82	1608.2	1733.86	339.199	864.747	782.96	411.69	531.495	1
ENSMUSG00000041827	Oasl1	2324.85	6.0102	1.10965	32.1827	1.02711e-07	2.72076e-06	23.3974	30.013	51.0291	612.469	6962.05	8037.14	1909.67	973.032	3
ENSMUSG00000024750	Zfand5	7523.56	-1.0121	0.202988	32.1646	1.03643e-07	2.7418e-06	11142.3	9233.99	11199.2	5532.28	5915.14	7326.33	4848.56	4990.6	1
ENSMUSG00000021792	Fam213a	1540.85	-1.81322	0.31462	32.1392	1.04967e-07	2.77317e-06	2285.14	2523.59	2125.08	1403.61	1083.14	1565.92	861.661	478.676	1
ENSMUSG00000022479	Vdr	177.545	0.318986	0.578167	32.0256	1.11102e-07	2.93137e-06	36.3959	88.7884	37.4214	616.29	268.336	200.416	108.34	64.3736	3
ENSMUSG00000038344	Txlng	767.412	-1.10658	0.265056	32.0139	1.11753e-07	2.94466e-06	1293.35	1129.24	1058	517.875	441.677	636.879	618.258	444.013	1
ENSMUSG00000028399	Ptprd	940.633	-1.24895	0.300732	31.9118	1.17608e-07	3.09484e-06	1366.15	1698.23	1407.27	482.522	559.197	839.967	608.868	562.856	1
ENSMUSG00000034226	Rhov	44.3559	6.46842	1.33711	31.9063	1.17933e-07	3.09932e-06	0	0	2.26796	49.6854	120.457	28.5037	78.0045	75.9278	3
ENSMUSG00000036257	Pnpla8	4374.43	-0.842858	0.17649	31.9002	1.18296e-07	3.10476e-06	6036.52	5798.76	5770.83	3469.38	3553.98	3910.35	3244.41	3211.25	1
ENSMUSG00000032312	Csk	858.881	1.8201	0.322028	31.8905	1.18869e-07	3.11571e-06	356.16	395.171	460.396	971.732	1002.83	765.145	1789.77	1129.84	2
ENSMUSG00000018398	Sept8	916.099	1.06127	0.245157	31.8878	1.19029e-07	3.11582e-06	800.71	701.553	742.757	806.433	521.003	577.199	1607.76	1571.38	2
ENSMUSG00000031373	Car5b	1225.39	-1.77358	0.297508	31.8681	1.20205e-07	3.14248e-06	1617.02	1609.45	1679.43	1699.82	1079.22	1075.12	683.262	359.832	1
ENSMUSG00000028599	Tnfrsf1b	1809.35	2.30069	0.501057	31.8604	1.20673e-07	3.15058e-06	469.247	422.683	494.416	1233.54	4839.84	2522.57	2438.36	2054.18	3
ENSMUSG00000044811	Cd300c2	180.068	5.76144	0.857034	31.8315	1.22425e-07	3.19215e-06	10.3988	2.50108	22.6796	251.294	63.6564	39.1925	617.536	433.284	2
ENSMUSG00000021880	Rnase6	65.968	5.83706	0.960948	31.7893	1.25039e-07	3.25607e-06	0	5.00216	13.6078	21.0208	99.8915	85.511	180.566	122.145	2
ENSMUSG00000026548	Slamf9	60.0245	2.96242	0.596317	31.7428	1.27979e-07	3.32829e-06	27.2969	15.0065	28.3495	15.2878	31.3385	30.2851	202.234	130.398	2
ENSMUSG00000050708	Ftl1	4947.45	1.6721	0.289685	31.7396	1.28182e-07	3.32924e-06	2417.73	2429.8	3092.37	5539.93	5201.21	3649.36	8767.56	8481.63	2
ENSMUSG00000050708	Ftl1	4947.45	1.6721	0.289685	31.7396	1.28182e-07	3.32924e-06	2417.73	2429.8	3092.37	5539.93	5201.21	3649.36	8767.56	8481.63	2
ENSMUSG00000086801	Gm15943	256.26	-1.78584	0.319602	31.7339	1.28548e-07	3.33439e-06	292.467	298.879	364.008	324.866	214.473	383.909	105.451	66.0242	1
ENSMUSG00000044350	Lacc1	259.127	3.68862	0.628339	31.6855	1.31697e-07	3.41167e-06	40.2955	47.5206	63.5029	107.97	394.669	333.137	753.321	332.597	2
ENSMUSG00000041754	Trem3	35.3003	0.150327	0.771969	31.68	1.3206e-07	3.41662e-06	10.3988	7.50325	6.80389	85.0385	108.705	39.1925	5.77811	18.982	3
ENSMUSG00000104145	D130019J16Rik	26.526	4.26187	0.825621	31.674	1.32458e-07	3.41806e-06	2.59971	2.50108	6.80389	23.8872	19.5866	60.5703	48.3917	47.8676	3
ENSMUSG00000027907	S100a11	1043.33	1.01607	0.254499	31.6743	1.32439e-07	3.41806e-06	600.532	528.979	653.173	1388.33	1527.75	1225.66	1348.47	1073.72	3
ENSMUSG00000033192	Lpcat2	170.1	1.07372	0.576992	31.6679	1.32861e-07	3.42405e-06	36.3959	40.0173	53.2971	571.382	297.716	154.098	98.9501	108.94	3
ENSMUSG00000030047	Arhgap25	321.62	2.61631	0.490622	31.6636	1.33151e-07	3.4271e-06	80.5909	56.2743	98.6563	750.059	336.889	239.609	527.253	483.627	2
ENSMUSG00000032115	Hyou1	2845.35	1.00269	0.215798	31.6476	1.3422e-07	3.45016e-06	1617.02	1874.56	1807.57	2996.41	4143.54	3207.55	3566.54	3549.63	3
ENSMUSG00000000275	Trim25	3231.49	1.71609	0.447266	31.6098	1.36782e-07	3.51149e-06	1033.38	1104.23	1093.16	2527.27	5975.86	7850.98	3796.94	2470.13	3
ENSMUSG00000039753	Fbxl5	2065.62	0.512712	0.23293	31.6072	1.36959e-07	3.51152e-06	1332.35	1245.54	1358.51	3387.21	2970.3	2299.89	2092.4	1838.77	3
ENSMUSG00000037989	Wnk2	3280.6	-1.23227	0.221107	31.5942	1.37851e-07	3.52986e-06	4307.71	4564.47	4613.03	2351.46	3665.63	2864.62	1650.37	2227.49	1
ENSMUSG00000048163	Selplg	763.589	3.50933	0.676882	31.582	1.38697e-07	3.54698e-06	57.1936	50.0216	155.355	2355.28	1122.31	514.847	1006.11	847.586	2
ENSMUSG00000035212	Leprot	418.851	1.04217	0.21838	31.5645	1.3991e-07	3.57342e-06	313.265	336.395	374.214	312.445	317.302	354.514	671.705	670.971	2
ENSMUSG00000090877	Hspa1b	664.456	-0.978523	0.498011	31.5466	1.4117e-07	3.601e-06	438.051	335.145	345.864	1925.31	1075.3	765.145	127.118	303.711	3
ENSMUSG00000036943	Rab8b	1449.99	1.92304	0.406941	31.5259	1.42638e-07	3.63381e-06	488.745	522.726	603.278	1044.35	2871.39	2344.43	2021.62	1703.42	3
ENSMUSG00000028048	Gba	647.94	1.44194	0.26065	31.4975	1.44675e-07	3.68101e-06	436.751	400.173	379.884	511.187	647.336	546.023	1261.07	1001.09	2
ENSMUSG00000027339	Rassf2	1099.24	2.12634	0.371787	31.458	1.47564e-07	3.74975e-06	449.749	383.916	399.161	1971.17	814.801	652.912	2344.47	1777.7	2
ENSMUSG00000078942	Naip6	182.29	3.8788	0.672294	31.4327	1.49445e-07	3.7927e-06	29.8966	16.257	39.6893	79.3056	338.848	211.996	431.191	311.139	2
ENSMUSG00000078942	Naip6	182.29	3.8788	0.672294	31.4327	1.49445e-07	3.7927e-06	29.8966	16.257	39.6893	79.3056	338.848	211.996	431.191	311.139	2
ENSMUSG00000109674	Gm45470	53.4203	-2.05711	0.635834	31.4076	1.51328e-07	3.83564e-06	127.386	127.555	61.235	21.9762	7.83463	8.01665	58.5034	14.8554	1
ENSMUSG00000018209	Stk4	979.073	1.29133	0.2377	31.3859	1.52978e-07	3.87254e-06	608.331	542.735	536.373	1323.35	1047.88	778.506	1605.59	1389.81	2
ENSMUSG00000031700	Gpt2	4237.56	-0.992972	0.1747	31.3753	1.53795e-07	3.88828e-06	5029.13	5728.73	5413.62	3810.49	4621.45	3771.39	2497.59	3028.04	1
ENSMUSG00000040687	Madd	607.427	2.24975	0.38769	31.3029	1.59467e-07	4.0266e-06	230.074	213.842	280.093	568.516	740.372	418.647	1489.31	918.562	2
ENSMUSG00000038642	Ctss	4379.25	6.2207	0.972699	31.2614	1.6281e-07	4.10582e-06	170.281	160.069	206.385	863.762	6246.16	3744.67	14426.5	9216.15	2
ENSMUSG00000099569	Gm18301	96.7395	2.90369	0.675199	31.2337	1.65079e-07	4.15778e-06	5.19941	25.0108	21.5456	97.4599	182.155	259.205	114.84	68.5001	3
ENSMUSG00000038473	Nos1ap	95.4649	0.594382	0.486646	31.2306	1.65336e-07	4.15901e-06	37.6958	43.7689	24.9476	268.492	129.271	127.376	91.7275	40.4398	3
ENSMUSG00000070003	Ssbp4	455.316	1.31969	0.263974	31.2119	1.66891e-07	4.19284e-06	248.272	305.132	184.839	565.65	554.3	438.244	740.32	605.772	2
ENSMUSG00000024481	Lvrn	372.358	-1.61712	0.278763	31.1915	1.686e-07	4.23047e-06	545.938	382.666	578.33	523.608	251.687	381.236	189.955	125.446	1
ENSMUSG00000002346	Slc25a42	1392.4	-1.31983	0.334061	31.1796	1.69602e-07	4.25027e-06	2224.05	2572.36	2025.29	609.602	786.401	1214.08	886.218	821.176	1
ENSMUSG00000029581	Fscn1	453.35	1.35694	0.248835	31.1342	1.735e-07	4.3425e-06	257.371	307.633	237.002	521.697	438.739	436.462	716.486	711.411	2
ENSMUSG00000023169	Slc38a1	341.982	2.4135	0.479026	31.1152	1.75157e-07	4.37848e-06	90.9897	67.5292	92.9864	813.121	423.07	219.122	533.031	496.007	2
ENSMUSG00000015950	Ncf1	652.306	3.17983	0.608452	31.1	1.7649e-07	4.40628e-06	93.5895	61.2765	149.685	1991.24	676.716	473.873	832.048	940.02	2
ENSMUSG00000025921	Rdh10	304.86	-0.618388	0.27501	31.0672	1.79404e-07	4.47346e-06	254.771	255.11	243.806	389.84	492.602	472.092	135.063	195.597	3
ENSMUSG00000116380		75.6357	2.52212	0.680713	31.0573	1.80297e-07	4.49012e-06	3.89956	18.7581	17.0097	154.789	119.478	153.207	85.9494	51.9941	3
ENSMUSG00000034854	Mfsd12	410.55	2.17172	0.386625	31.043	1.81594e-07	4.51635e-06	204.077	147.564	221.126	265.626	445.595	306.414	962.778	731.218	2
ENSMUSG00000038059	Smim3	205.279	0.337559	0.362169	31.0407	1.81803e-07	4.51635e-06	122.186	95.0411	111.13	279.003	446.574	301.07	132.897	154.332	3
ENSMUSG00000023349	Clec4n	251.431	3.17016	0.711933	31.0148	1.84168e-07	4.56943e-06	23.3974	20.0087	46.4932	127.08	940.155	399.942	228.235	226.133	3
ENSMUSG00000095609	Gm21188	183.938	4.8282	0.877977	30.9527	1.89977e-07	4.70771e-06	9.09897	2.50108	30.6175	88.8605	537.651	326.011	267.96	208.802	3
ENSMUSG00000037455	Slc18b1	203.551	-1.05152	0.278125	30.9269	1.92448e-07	4.76304e-06	301.566	290.125	346.998	137.59	127.313	130.048	161.065	133.699	1
ENSMUSG00000022696	Sidt1	49.5084	2.20216	0.58559	30.9215	1.92967e-07	4.76997e-06	14.2984	15.0065	4.53592	106.059	78.3463	57.0073	55.6143	65.1989	2
ENSMUSG00000113859	AC154389.1	34.8543	-2.87732	0.703182	30.8643	1.98567e-07	4.90231e-06	96.1892	55.0238	77.1107	11.4659	11.7519	3.56296	13.0007	10.7289	1
ENSMUSG00000026558	Uck2	1222.13	0.441139	0.361931	30.8131	2.03719e-07	5.0233e-06	592.733	635.275	614.618	2160.36	2490.43	1336.11	603.09	1344.42	3
ENSMUSG00000024713	Pcsk5	829.887	-0.920959	0.228061	30.781	2.07014e-07	5.09826e-06	847.504	741.571	912.855	1157.1	800.111	1362.83	462.249	354.88	3
ENSMUSG00000110588	Gm45774	279.944	-0.43822	0.491586	30.7615	2.09042e-07	5.14186e-06	139.084	136.309	139.48	344.932	863.768	402.614	130.007	83.3556	3
ENSMUSG00000006411	Nectin4	147.488	3.66772	0.707603	30.7343	2.11905e-07	5.19948e-06	7.79912	38.7668	11.3398	226.451	185.093	216.45	332.241	161.759	3
ENSMUSG00000056290	Ms4a4b	295.88	4.77394	0.890292	30.7351	2.11812e-07	5.19948e-06	18.1979	25.0108	9.07185	63.0623	945.052	416.866	583.589	306.187	3
ENSMUSG00000025511	Tspan4	814.939	0.38543	0.237696	30.7211	2.13307e-07	5.22747e-06	504.343	520.225	603.278	1251.69	1089.99	1155.29	804.602	590.091	3
ENSMUSG00000085295	4930430E12Rik	75.3202	4.69424	0.816073	30.7186	2.13572e-07	5.22755e-06	5.19941	10.0043	9.07185	21.9762	142.003	81.0573	197.9	135.35	2
ENSMUSG00000001270	Ckb	174.252	1.4494	0.380428	30.6841	2.17284e-07	5.31189e-06	122.186	142.562	149.685	105.104	60.7184	103.326	319.241	391.193	2
ENSMUSG00000039956	Mrap	526.971	-1.72714	0.349766	30.6648	2.19399e-07	5.35703e-06	534.24	532.73	630.493	1006.13	609.142	530.881	237.625	134.524	3
ENSMUSG00000049303	Syt12	250.99	-0.685303	0.322031	30.6553	2.20441e-07	5.37591e-06	139.084	250.108	200.715	361.175	509.251	290.381	106.173	151.03	3
ENSMUSG00000034947	Tmem106a	1097.34	2.99169	0.534534	30.6322	2.23004e-07	5.43178e-06	306.765	316.387	291.433	435.703	1585.53	1347.69	2784.33	1710.85	2
ENSMUSG00000021322	Aoah	228.974	5.18937	0.920029	30.5754	2.29423e-07	5.58132e-06	12.9985	17.5076	9.07185	46.819	465.181	458.731	605.257	216.229	3
ENSMUSG00000101609	Kcnq1ot1	4761.96	-1.03754	0.208316	30.5477	2.32623e-07	5.65228e-06	7040.01	6196.43	6408.13	4937.01	3487.39	3402.62	3452.42	3171.64	1
ENSMUSG00000052760	A630001G21Rik	104.427	4.40124	0.773174	30.528	2.3492e-07	5.70117e-06	9.09897	13.7559	18.1437	30.5757	178.238	172.803	265.071	147.729	3
ENSMUSG00000026463	Atp2b4	1509.8	-0.830919	0.214899	30.486	2.39907e-07	5.81511e-06	2276.04	1975.85	2150.03	1002.31	1063.55	1305.82	1217.01	1087.75	1
ENSMUSG00000025473	Adam8	985.968	2.84107	0.533323	30.4566	2.4346e-07	5.89408e-06	183.279	137.559	298.237	1781.03	1754.96	655.584	1553.59	1523.51	2
ENSMUSG00000038623	Tm6sf1	408.227	1.74787	0.312923	30.4518	2.4405e-07	5.90123e-06	217.076	161.32	234.734	492.077	426.008	324.229	810.38	599.995	2
ENSMUSG00000033213	AA467197	85.8034	3.52492	1.06496	30.4366	2.45911e-07	5.93903e-06	5.19941	0	9.07185	80.2611	282.047	228.029	62.837	18.982	3
ENSMUSG00000074115	Saa1	207.043	2.45528	0.672257	30.4223	2.4767e-07	5.97428e-06	16.8981	67.5292	24.9476	556.095	238.956	308.196	129.285	314.44	2
ENSMUSG00000066026	Dhrs3	1432.93	0.591618	0.196697	30.4106	2.49124e-07	6.00212e-06	1654.71	1160.5	1485.51	1104.55	794.236	1165.98	2271.52	1826.39	2
ENSMUSG00000029361	Nos1	3059.54	-1.6195	0.308765	30.3879	2.51972e-07	6.06341e-06	4757.46	4326.87	4981.58	1565.09	3162.25	2654.4	1227.85	1800.81	1
ENSMUSG00000035493	Tgfbi	2998.24	2.23927	0.39806	30.3537	2.56313e-07	6.16047e-06	1068.48	925.4	1114.7	3580.22	4336.47	1783.26	6823.95	4353.47	2
ENSMUSG00000024885	Aldh3b1	207.88	2.78196	0.47814	30.2778	2.66228e-07	6.39107e-06	55.8937	50.0216	75.9767	305.757	161.589	108.67	510.641	394.495	2
ENSMUSG00000038296	Galnt18	233.242	-0.486799	0.259312	30.2696	2.6732e-07	6.40958e-06	220.975	165.071	189.375	388.884	295.757	329.574	157.454	118.844	3
ENSMUSG00000048612	Myof	1631.78	2.31803	0.410714	30.2566	2.69069e-07	6.44378e-06	679.823	630.273	574.928	946.89	2324.93	858.673	3773.83	3264.9	2
ENSMUSG00000022091	Sorbs3	1679.06	-1.22844	0.28529	30.2396	2.71364e-07	6.49097e-06	2738.79	2381.03	2639.91	1382.59	777.587	1441.22	1036.45	1034.93	1
ENSMUSG00000042817	Flt3	48.4902	3.785	0.710576	30.2022	2.76488e-07	6.60562e-06	7.79912	6.2527	12.4738	25.7982	60.7184	91.7461	110.506	72.6266	3
ENSMUSG00000091971	Hspa1a	354.667	-1.10577	0.450362	30.1818	2.79318e-07	6.66526e-06	315.864	165.071	258.548	920.136	495.54	454.277	91.7275	136.175	3
ENSMUSG00000100121	1700025N23Rik	17.179	7.24547	1.50285	30.1403	2.85181e-07	6.79704e-06	0	0	0	20.0653	20.5659	38.3018	35.3909	23.1085	3
ENSMUSG00000045362	Tnfrsf26	59.401	3.0325	0.769679	30.1345	2.86e-07	6.80843e-06	7.79912	5.00216	9.07185	66.8842	178.238	87.2925	78.0045	42.9157	3
ENSMUSG00000030022	Adamts9	2322.65	-1.24765	0.355342	30.0742	2.94765e-07	7.00873e-06	2126.56	1932.09	1962.92	2260.69	3904.58	4816.23	889.829	688.302	3
ENSMUSG00000039899	Fgl2	5190.9	0.960968	0.41406	30.062	2.96572e-07	7.04332e-06	2190.25	1985.86	2478.88	5843.77	11703	8987.56	5415.53	2922.4	3
ENSMUSG00000021262	Evl	449.031	2.47948	0.516352	30.0375	3.00223e-07	7.12156e-06	137.784	88.7884	134.944	328.688	944.073	674.29	761.266	522.417	3
ENSMUSG00000027346	Gpcpd1	7944.26	-1.0136	0.215313	30.0182	3.03126e-07	7.18189e-06	11068.3	11183.6	11173.1	5182.57	6956.17	7298.72	5276.86	5414.81	1
ENSMUSG00000041836	Ptpre	431.272	1.93016	0.383596	30.0133	3.03869e-07	7.19096e-06	161.182	150.065	166.695	522.653	766.814	334.918	739.598	608.248	3
ENSMUSG00000029195	Klb	306.56	-1.23849	0.409385	30.0077	3.0472e-07	7.20256e-06	510.842	452.696	591.938	165.3	105.767	151.426	364.743	109.765	1
ENSMUSG00000089762	Ier5l	161.67	0.422652	0.38992	29.9958	3.06543e-07	7.23709e-06	90.9897	52.5227	117.934	219.762	274.212	340.262	106.895	90.7833	3
ENSMUSG00000028713	Cyp4b1	398.092	-1.46147	0.291247	29.987	3.07902e-07	7.26059e-06	591.433	558.992	664.513	343.976	222.308	383.909	263.626	155.982	1
ENSMUSG00000022895	Ets2	2148.84	-0.324814	0.29009	29.9828	3.0854e-07	7.26706e-06	1700.21	1431.87	1561.49	2457.52	4160.19	3376.79	1201.12	1301.5	3
ENSMUSG00000090215	Trim34b	149.571	2.73222	0.599619	29.9569	3.12569e-07	7.35328e-06	27.2969	26.2614	44.2253	87.905	327.096	343.825	197.178	142.777	3
ENSMUSG00000004709	Cd244	151.929	2.26533	0.613429	29.9512	3.13456e-07	7.36547e-06	24.6972	21.2592	52.1631	215.941	417.194	199.526	174.066	110.591	3
ENSMUSG00000084796	Mir142hg	76.8911	3.48499	0.678933	29.9146	3.19241e-07	7.49261e-06	12.9985	3.75162	18.1437	143.323	115.561	71.2591	144.453	105.639	2
ENSMUSG00000066687	Zbtb16	5588.29	-1.32279	0.235086	29.9002	3.21546e-07	7.52901e-06	6673.45	6507.81	8169.2	6416.11	5517.54	5945.68	2408.03	3068.48	1
ENSMUSG00000079597	Gm5483	78.7301	-0.0218186	0.970129	29.9005	3.21501e-07	7.52901e-06	2.59971	15.0065	18.1437	207.341	264.419	97.9813	20.2234	4.12651	3
ENSMUSG00000022973	Synj1	1325.4	1.6972	0.324823	29.8647	3.27306e-07	7.6549e-06	623.93	610.264	762.035	1051.04	1837.22	1724.47	2263.57	1730.66	3
ENSMUSG00000017561	Crlf3	501.822	1.57134	0.336431	29.8532	3.29195e-07	7.69007e-06	217.076	262.614	230.198	499.721	710.013	735.751	804.602	554.603	3
ENSMUSG00000041797	Abca9	919.398	0.0903787	0.258708	29.8489	3.29907e-07	7.69771e-06	1178.97	1140.49	1089.76	506.409	464.202	604.812	1016.23	1354.32	1
ENSMUSG00000043263	Ifi209	1704.87	7.22997	1.23376	29.8067	3.36942e-07	7.85268e-06	10.3988	17.5076	22.6796	318.178	5903.39	4100.07	2139.35	1127.36	3
ENSMUSG00000041870	Ankrd13a	1212.01	1.28855	0.257006	29.802	3.37741e-07	7.86209e-06	651.227	730.316	624.823	1737.08	1355.39	1053.74	1679.99	1863.53	2
ENSMUSG00000106734	Gm20559	1089.32	3.27739	0.672543	29.7973	3.38527e-07	7.86209e-06	146.883	182.579	168.963	356.397	2572.7	2649.06	1612.09	1025.85	3
ENSMUSG00000001473	Tubb6	1377.89	1.42203	0.3427	29.7992	3.3821e-07	7.86209e-06	639.528	525.227	627.091	1660.64	2546.25	1499.11	1240.85	2284.44	3
ENSMUSG00000037112	Sik2	2419.53	-1.26476	0.311546	29.7892	3.39912e-07	7.88509e-06	3808.57	3847.91	3557.3	2109.72	1106.64	1519.6	2298.97	1107.56	1
ENSMUSG00000022906	Parp9	2107.73	2.45213	0.59505	29.7732	3.42635e-07	7.93904e-06	464.048	418.931	429.779	1192.45	4822.21	5231.31	2852.22	1450.88	3
ENSMUSG00000022876	Samsn1	288.918	1.89149	0.569549	29.7344	3.49347e-07	8.08517e-06	66.2925	48.7711	97.5224	235.05	864.747	533.553	254.959	210.452	3
ENSMUSG00000116639		174.21	4.04031	0.853474	29.7306	3.5001e-07	8.09115e-06	7.79912	20.0087	15.8757	58.2848	426.008	562.057	214.512	89.1327	3
ENSMUSG00000028980	H6pd	4306.01	-0.53597	0.206566	29.7222	3.51476e-07	8.11564e-06	3651.29	3776.63	4334.08	5868.61	5897.52	5603.64	2900.61	2415.66	3
ENSMUSG00000036622	Atp13a2	894.806	1.1553	0.269403	29.7181	3.52208e-07	8.11984e-06	711.02	709.057	671.317	594.314	683.571	512.175	1940	1336.99	2
ENSMUSG00000029570	Lfng	458.289	2.43022	0.441959	29.7166	3.52471e-07	8.11984e-06	133.885	98.7927	221.126	770.124	500.437	378.564	923.775	639.61	2
ENSMUSG00000111377	AC153536.2	78.273	-1.23624	0.409489	29.7005	3.55315e-07	8.17593e-06	72.7918	70.0303	49.8952	121.347	151.796	99.7628	26.7238	33.8374	3
ENSMUSG00000021306	Gpr137b	159.459	1.33656	0.301146	29.6956	3.56182e-07	8.18645e-06	126.086	110.048	124.738	98.4154	109.685	114.905	312.018	279.778	2
ENSMUSG00000028780	Sema3c	1509.64	-0.313329	0.251924	29.6881	3.57535e-07	8.20811e-06	2083.67	2152.18	1889.21	792.1	855.933	1059.09	1372.3	1872.61	1
ENSMUSG00000055322	Tns1	18967	-1.09747	0.208644	29.6824	3.58542e-07	8.21922e-06	25820.3	25170.9	26285.7	14159.4	16816.1	20560.9	10784.8	12137.7	1
ENSMUSG00000031626	Sorbs2	1401.01	-1.00112	0.315373	29.6808	3.58842e-07	8.21922e-06	2426.83	2090.9	2089.93	676.486	697.282	1166.87	897.774	1162.03	1
ENSMUSG00000037876	Jmjd1c	4488.29	0.0234709	0.196863	29.5792	3.77533e-07	8.63741e-06	3828.07	3313.93	3251.12	5797.91	6542.89	5992.89	3718.21	3461.32	3
ENSMUSG00000030165	Klrd1	33.1927	5.6148	1.15792	29.5204	3.88804e-07	8.88511e-06	1.29985	1.25054	1.13398	21.0208	83.2429	23.1592	75.8377	58.5965	3
ENSMUSG00000054892	Txk	61.3137	3.63661	0.763911	29.4986	3.93062e-07	8.97214e-06	7.79912	10.0043	4.53592	50.6409	142.982	80.1665	130.007	64.3736	3
ENSMUSG00000035517	Tdrd7	1309.4	2.19335	0.478225	29.4677	3.99175e-07	9.10128e-06	400.355	405.175	420.707	807.388	2462.03	2641.93	1931.33	1406.32	3
ENSMUSG00000037573	Tob1	3462.76	-0.466559	0.231378	29.4467	4.03391e-07	9.18691e-06	4765.26	4301.86	5385.28	1873.71	2016.44	3071.27	2832.72	3455.54	1
ENSMUSG00000021779	Thrb	908.41	-0.808129	0.229266	29.4234	4.08131e-07	9.28429e-06	1331.05	1266.8	1290.47	634.445	567.031	747.33	665.927	764.23	1
ENSMUSG00000066361	Serpina3c	531.648	-0.723065	0.389596	29.4173	4.09366e-07	9.30177e-06	300.266	387.668	409.367	1163.79	734.496	782.069	322.852	152.681	3
ENSMUSG00000024972	Lgals12	829.685	-1.9348	0.392213	29.3905	4.149e-07	9.41681e-06	1302.45	1548.17	1315.42	661.198	407.401	612.829	565.533	224.482	1
ENSMUSG00000020869	Lrrc59	2049.68	0.687082	0.196882	29.3848	4.16081e-07	9.4329e-06	1366.15	1403.11	1384.59	2318.02	2874.33	2600.96	2248.41	2201.91	3
ENSMUSG00000027435	Cd93	2031.75	1.72011	0.334116	29.3728	4.18586e-07	9.47892e-06	1487.03	915.396	1214.49	1245	1905.77	1410.93	3993.4	4081.95	2
ENSMUSG00000049791	Fzd4	4850.93	-1.0299	0.209241	29.3583	4.21629e-07	9.53702e-06	6458.97	6925.5	6688.22	3494.22	4165.08	4765.46	3253.08	3056.92	1
ENSMUSG00000035021	Baz1a	970.635	0.867183	0.27685	29.319	4.29996e-07	9.71528e-06	527.741	614.016	521.631	1128.43	1527.75	1434.98	1127.45	883.074	3
ENSMUSG00000043091	Tuba1c	433.115	1.35932	0.347311	29.2868	4.36964e-07	9.86157e-06	167.681	185.08	226.796	675.531	740.372	432.899	497.64	538.923	3
ENSMUSG00000026640	Plxna2	1528.76	-1.14197	0.208704	29.2522	4.44589e-07	1.00223e-05	1901.69	1922.08	1753.13	1442.79	1947.88	1509.8	782.934	969.731	1
ENSMUSG00000029832	Nfe2l3	215.402	-0.164673	0.326129	29.249	4.45317e-07	1.00274e-05	183.279	141.311	105.46	397.483	293.799	321.557	181.288	99.0363	3
ENSMUSG00000003873	Bax	264.898	1.43163	0.269693	29.2397	4.4738e-07	1.00625e-05	129.985	163.821	157.623	244.605	347.662	252.079	371.966	451.441	2
ENSMUSG00000026158	Ogfrl1	750.467	1.01438	0.427417	29.2369	4.48013e-07	1.00654e-05	219.675	366.408	294.835	1940.6	1013.61	856.891	651.482	660.242	3
ENSMUSG00000039206	Daglb	593.636	1.0103	0.2421	29.1652	4.64364e-07	1.04211e-05	500.444	433.938	560.187	441.436	440.698	397.27	964.944	1010.17	2
ENSMUSG00000035004	Igsf6	405.187	2.42539	0.537271	29.1184	4.75353e-07	1.06557e-05	92.2896	55.0238	154.221	711.839	811.863	383.909	585.034	447.314	3
ENSMUSG00000016206	H2-M3	217.642	3.42879	0.614666	29.1123	4.76802e-07	1.06762e-05	55.8937	28.7624	63.5029	96.5044	308.489	229.811	601.646	356.531	2
ENSMUSG00000038256	Bcl9	443.635	0.85049	0.293978	29.1017	4.79343e-07	1.07211e-05	222.275	258.862	266.486	579.026	579.763	800.775	496.918	344.976	3
ENSMUSG00000042807	Hecw2	375.982	-1.07255	0.253515	29.0838	4.83653e-07	1.08054e-05	488.745	526.478	665.647	257.027	288.902	273.457	225.346	282.253	1
ENSMUSG00000001751	Naglu	254.949	1.27817	0.270745	29.0377	4.94919e-07	1.10447e-05	185.879	176.326	196.179	205.43	190.969	171.022	438.414	475.374	2
ENSMUSG00000056220	Pla2g4a	152.576	1.65787	0.328312	29.0292	4.97043e-07	1.10797e-05	87.0902	78.7841	53.2971	170.077	181.176	153.207	236.18	260.796	2
ENSMUSG00000000693	Loxl3	396.002	2.18218	0.429103	28.9734	5.11101e-07	1.13804e-05	162.482	146.313	145.15	256.071	547.445	634.206	702.763	573.585	3
ENSMUSG00000025372	Baiap2	535.166	0.679066	0.330502	28.9522	5.16555e-07	1.1489e-05	254.771	256.361	382.152	583.804	915.672	1067.11	478.139	343.326	3
ENSMUSG00000038400	Pmepa1	1726.82	-1.47665	0.27021	28.9486	5.17467e-07	1.14965e-05	2066.77	2174.69	2306.52	1391.19	1694.24	2772.87	663.038	745.248	1
ENSMUSG00000031930	Wwp2	713.986	1.20033	0.225068	28.9229	5.24177e-07	1.16197e-05	453.649	426.434	518.229	734.771	760.938	718.827	1131.79	967.255	2
ENSMUSG00000107215	Gm43197	503.748	2.92097	0.657371	28.9231	5.24123e-07	1.16197e-05	94.8893	86.2873	70.3068	234.095	1156.59	1222.99	720.819	444.013	3
ENSMUSG00000054823	Nsd3	2742.49	0.449084	0.284374	28.8836	5.34562e-07	1.18368e-05	1805.5	1599.44	1634.07	3175.09	4548.98	4706.67	2496.87	1973.3	3
ENSMUSG00000022206	Npr3	1888.23	-1.79427	0.356102	28.8742	5.37084e-07	1.18795e-05	3597.99	1668.22	4272.84	991.798	1194.78	1875.9	973.612	530.67	1
ENSMUSG00000070576	Mn1	2648.22	-0.389619	0.250321	28.8363	5.47353e-07	1.20932e-05	3105.35	3614.06	4415.72	1087.35	1574.76	2547.51	2142.23	2698.74	1
ENSMUSG00000043719	Col6a6	174.687	-0.335126	0.301923	28.8096	5.54716e-07	1.22424e-05	258.671	252.609	217.724	104.148	79.3256	87.2925	191.4	206.326	1
ENSMUSG00000032740	Ccdc88a	614.806	1.20092	0.224809	28.8031	5.56528e-07	1.22681e-05	363.959	435.188	427.511	605.78	615.998	618.173	967.111	884.724	2
ENSMUSG00000035891	Cerk	547.995	1.5467	0.295091	28.801	5.57111e-07	1.22681e-05	302.866	343.899	341.328	549.406	457.346	324.229	1076.17	988.713	2
ENSMUSG00000114608	AC238811.2	125.654	4.06186	0.794833	28.7938	5.59134e-07	1.22991e-05	12.9985	12.5054	13.6078	37.2641	333.951	211.105	208.012	175.789	3
ENSMUSG00000062082	Cd200r4	73.1301	6.02025	1.10311	28.7702	5.65744e-07	1.24308e-05	2.59971	0	6.80389	28.6647	172.362	92.6369	175.51	106.464	3
ENSMUSG00000032311	Nrg4	737.438	-1.99025	0.523294	28.7545	5.70219e-07	1.25154e-05	1310.25	1560.67	1292.74	343.021	133.189	562.057	496.195	201.374	1
ENSMUSG00000027843	Ptpn22	231.093	2.91194	0.531836	28.7368	5.75285e-07	1.26127e-05	42.8952	42.5184	62.3689	412.771	304.571	124.704	493.306	365.609	2
ENSMUSG00000070436	Serpinh1	3475.87	0.90291	0.169649	28.7114	5.8263e-07	1.2746e-05	2608.81	2736.18	2489.09	3271.59	3576.51	3027.62	4735.16	5361.99	2
ENSMUSG00000029379	Cxcl3	64.7012	1.59718	0.726465	28.7114	5.82643e-07	1.2746e-05	10.3988	7.50325	23.8136	74.5281	190.969	145.191	40.4468	24.7591	3
ENSMUSG00000056494	Cngb3	35.3398	8.83007	1.64941	28.6645	5.96473e-07	1.30343e-05	0	0	0	9.55489	44.0698	42.7555	151.675	34.6627	2
ENSMUSG00000016559	H3f3b	4617.97	1.52217	0.37518	28.6546	5.99425e-07	1.30845e-05	2088.86	1830.79	2032.09	4074.21	8861.94	6959.35	6280.08	4816.47	3
ENSMUSG00000016559	H3f3b	4617.97	1.52217	0.37518	28.6546	5.99425e-07	1.30845e-05	2088.86	1830.79	2032.09	4074.21	8861.94	6959.35	6280.08	4816.47	3
ENSMUSG00000016559	H3f3b	4617.97	1.52217	0.37518	28.6546	5.99425e-07	1.30845e-05	2088.86	1830.79	2032.09	4074.21	8861.94	6959.35	6280.08	4816.47	3
ENSMUSG00000039621	Prex1	1092.6	2.08769	0.380943	28.6316	6.06352e-07	1.32212e-05	392.556	393.92	455.86	1662.55	1196.74	646.677	2235.41	1757.07	2
ENSMUSG00000102155	Gm37468	42.6146	4.02157	0.896539	28.5896	6.19211e-07	1.34869e-05	1.29985	2.50108	6.80389	82.1721	89.1189	45.4277	65.726	47.8676	3
ENSMUSG00000051498	Tlr6	161.634	1.96132	0.385839	28.5872	6.19957e-07	1.34885e-05	71.4919	48.7711	66.9049	250.338	192.928	127.376	326.463	208.802	2
ENSMUSG00000029571	Tmem106b	2193.96	-0.53382	0.220141	28.5726	6.24518e-07	1.35581e-05	2977.96	3010.05	3074.22	1327.17	1338.74	1901.73	1967.45	1954.32	1
ENSMUSG00000026923	Notch1	2232.48	0.0124319	0.237296	28.5734	6.24267e-07	1.35581e-05	1719.71	1373.09	1824.58	4082.8	2757.79	2784.45	1835.99	1481.42	3
ENSMUSG00000028088	Fmo5	367.957	-0.82669	0.225625	28.5556	6.29836e-07	1.36439e-05	514.742	442.691	630.493	260.849	238.956	310.868	292.517	252.543	1
ENSMUSG00000039145	Camk1d	344.595	1.72862	0.323882	28.5571	6.29376e-07	1.36439e-05	205.377	158.819	207.519	286.647	357.455	231.592	668.094	641.26	2
ENSMUSG00000022040	Ephx2	2587.81	-1.7248	0.354523	28.5329	6.37028e-07	1.37848e-05	4050.34	4404.4	4031.3	1337.68	1747.12	2813.85	1391.8	925.99	1
ENSMUSG00000083822	Hmgb1-ps5	36.4208	7.86526	1.57468	28.5301	6.3792e-07	1.37891e-05	0	0	1.13398	9.55489	87.1602	54.3351	88.8384	50.3435	3
ENSMUSG00000013483	Card14	166.567	1.42199	0.666595	28.5191	6.41446e-07	1.38504e-05	20.7977	61.2765	27.2155	236.006	610.122	174.585	142.286	60.2471	3
ENSMUSG00000028613	Lrp8	85.4049	2.21767	0.548822	28.4858	6.52211e-07	1.40676e-05	23.3974	32.5141	11.3398	165.3	96.9535	127.376	114.118	112.241	2
ENSMUSG00000074001	Klhl40	6850.15	1.20029	0.413303	28.4622	6.59945e-07	1.42191e-05	2844.08	2162.19	2806.6	13804.9	13672.4	5674.9	5583.1	8253.03	3
ENSMUSG00000046532	Ar	1241.02	-0.348174	0.226745	28.4513	6.63568e-07	1.42817e-05	1462.34	1983.36	1518.4	649.733	871.602	881.832	1209.07	1351.85	1
ENSMUSG00000026104	Stat1	1648.45	2.92171	0.623383	28.4482	6.64597e-07	1.42885e-05	276.869	435.188	275.557	923.958	3225.91	3680.53	3109.35	1260.24	3
ENSMUSG00000087477	Gm13822	22.4619	5.85663	1.49473	28.4371	6.68298e-07	1.43403e-05	1.29985	0	0	21.0208	64.6357	39.1925	29.6128	23.9338	3
ENSMUSG00000114375	AC238811.1	23.2662	5.6857	1.37333	28.4366	6.68445e-07	1.43403e-05	1.29985	0	1.13398	18.1543	46.0284	52.5536	39.7245	27.235	3
ENSMUSG00000084390	Gm15425	39.5847	-3.42363	0.754837	28.4297	6.70763e-07	1.43746e-05	88.39	101.294	63.5029	8.5994	12.7313	27.6129	7.9449	6.60242	1
ENSMUSG00000037638	Zbtb42	110.312	1.74088	0.4334	28.4166	6.75183e-07	1.44538e-05	57.1936	27.5119	31.7515	273.27	107.726	106.889	156.009	122.145	2
ENSMUSG00000003123	Lipe	4882.63	-1.68962	0.358105	28.3641	6.93126e-07	1.48221e-05	7370.17	8396.13	7836.94	4088.54	2289.67	3937.07	3586.04	1556.52	1
ENSMUSG00000108076	9530086O07Rik	213.331	-1.46846	0.384661	28.3552	6.96224e-07	1.48724e-05	465.348	325.141	292.567	130.902	80.3049	160.333	136.508	115.542	1
ENSMUSG00000061119	Prcp	421.222	1.63072	0.307251	28.3524	6.97207e-07	1.48775e-05	269.07	211.341	231.332	329.644	460.284	377.673	827.714	662.718	2
ENSMUSG00000003363	Pld3	609.856	1.29742	0.256008	28.3115	7.11583e-07	1.51553e-05	402.955	423.933	424.109	432.837	644.398	434.681	1007.56	1108.38	2
ENSMUSG00000079523	Tmsb10	1596.51	2.66336	0.527079	28.3111	7.11745e-07	1.51553e-05	470.547	525.227	319.783	824.587	3118.18	1890.15	3390.31	2233.27	3
ENSMUSG00000025498	Irf7	6150.75	5.89706	1.03024	28.2865	7.20553e-07	1.53265e-05	181.979	227.598	250.61	1480.05	14018.1	12522.9	13251.4	7273.39	3
ENSMUSG00000035439	Haus8	123.264	2.26437	0.423157	28.2741	7.25047e-07	1.54057e-05	41.5953	57.5249	43.0913	160.522	92.0569	89.0739	280.238	222.006	2
ENSMUSG00000002831	Plin4	27559.8	-1.15385	0.211978	28.2703	7.26403e-07	1.54181e-05	34771.1	29879.2	38888.7	29388.9	25172.7	32678.6	18350.6	11348.7	1
ENSMUSG00000078495	Zfp984	65.2216	2.40127	0.455041	28.2373	7.38497e-07	1.56582e-05	25.9971	23.7603	27.2155	67.8397	45.0491	53.4444	176.955	101.512	2
ENSMUSG00000039232	Stx11	291.977	1.03197	0.451505	28.1697	7.63896e-07	1.61795e-05	115.687	103.795	133.81	306.712	665.943	561.166	273.738	174.964	3
ENSMUSG00000025823	Pdia4	1646.89	1.32862	0.268218	28.1517	7.70804e-07	1.63086e-05	873.502	925.4	985.429	1819.25	2167.25	1654.99	2733.05	2016.21	3
ENSMUSG00000068747	Sort1	3714.7	-1.0478	0.212289	28.096	7.92558e-07	1.67511e-05	5172.12	5623.68	4362.42	3233.38	3020.25	3303.75	2592.93	2409.06	1
ENSMUSG00000057219	Armc7	116.806	2.29805	0.449239	28.0834	7.97564e-07	1.68035e-05	33.7962	40.0173	35.1534	207.341	121.437	81.948	228.235	186.518	2
ENSMUSG00000001281	Itgb7	405.891	2.78626	0.517508	28.0852	7.96838e-07	1.68035e-05	115.687	90.0389	145.15	240.783	721.765	392.816	884.773	656.116	2
ENSMUSG00000032802	Srxn1	1998.23	-0.621965	0.33597	28.0868	7.96221e-07	1.68035e-05	1840.59	1215.53	1422.01	2711.68	3984.89	2740.8	841.437	1228.88	3
ENSMUSG00000032011	Thy1	342.981	0.513648	0.30108	28.0462	8.12529e-07	1.71008e-05	378.257	370.16	337.926	233.139	170.403	138.065	502.696	613.2	2
ENSMUSG00000022584	Ly6c2	2437.08	6.31589	1.05037	28.0357	8.16825e-07	1.71731e-05	84.4905	98.7927	77.1107	381.24	4037.77	2324.83	7793.95	4698.45	2
ENSMUSG00000015314	Slamf6	65.8124	4.0142	0.786694	28.0121	8.26532e-07	1.73589e-05	5.19941	12.5054	7.93787	34.3976	137.106	101.544	144.453	83.3556	3
ENSMUSG00000024427	Spry4	447.653	-1.70315	0.312235	27.9927	8.34556e-07	1.7509e-05	738.317	533.981	697.398	384.107	423.07	405.286	164.676	234.386	1
ENSMUSG00000037553	Zdhhc18	957.916	0.508451	0.225725	27.9541	8.50828e-07	1.78317e-05	634.329	705.305	572.66	1077.79	1496.41	1335.22	871.05	970.556	3
ENSMUSG00000039942	Ptger4	238.169	1.37796	0.314266	27.9416	8.56166e-07	1.79247e-05	204.077	117.551	234.734	152.878	148.858	193.29	516.419	337.549	2
ENSMUSG00000028127	Abcd3	2381.38	-0.94607	0.258301	27.9323	8.60172e-07	1.79898e-05	3093.65	4166.8	3257.93	1524.96	1482.7	2009.51	1720.43	1795.03	1
ENSMUSG00000032846	Zswim6	409.256	0.982823	0.242476	27.9174	8.66586e-07	1.81049e-05	237.873	272.618	235.868	485.388	529.817	525.536	515.696	471.248	3
ENSMUSG00000029233	Srd5a3	228.202	2.03412	0.375754	27.8128	9.13115e-07	1.90571e-05	89.6899	87.5379	134.944	267.537	224.266	181.711	481.75	358.181	2
ENSMUSG00000103101	Gm37048	155.712	-1.67374	0.386023	27.7576	9.38695e-07	1.95705e-05	293.767	255.11	225.662	151.923	66.5943	78.3851	91.7275	82.5303	1
ENSMUSG00000027222	Pex16	519.905	-0.833207	0.232254	27.718	9.57425e-07	1.98987e-05	682.423	711.558	838.012	408.949	321.22	401.723	412.413	382.94	1
ENSMUSG00000039109	F13a1	2047.85	1.24934	0.44458	27.7207	9.5616e-07	1.98987e-05	835.806	520.225	1010.38	2465.16	5102.3	2786.23	1920.5	1742.21	3
ENSMUSG00000024730	Ms4a8a	111.641	4.48403	0.934853	27.719	9.56953e-07	1.98987e-05	15.5982	2.50108	4.53592	57.3293	284.985	171.913	239.069	117.193	3
ENSMUSG00000037316	Bag4	304.834	-0.796653	0.260568	27.7048	9.63786e-07	2.00101e-05	432.851	446.443	446.788	228.362	173.341	198.635	285.294	226.958	1
ENSMUSG00000020154	Ptprb	3117.19	-0.437728	0.232532	27.6927	9.69612e-07	2.01101e-05	4493.59	4144.29	4103.88	1820.21	1849.95	2510.99	2882.55	3132.02	1
ENSMUSG00000037138	Aff3	268.492	0.229489	0.291155	27.6872	9.72294e-07	2.01448e-05	361.359	270.117	353.802	145.234	126.333	170.131	332.241	388.718	1
ENSMUSG00000005103	Wdr1	3162.54	1.16643	0.249555	27.6607	9.85271e-07	2.03925e-05	1863.99	1820.79	2025.29	3008.84	4429.5	3809.69	4384.86	3957.33	3
ENSMUSG00000052821	Cysltr1	104.711	3.759	0.676464	27.6479	9.91583e-07	2.0502e-05	22.0975	5.00216	36.2874	91.727	128.292	98.8721	278.794	176.615	2
ENSMUSG00000016494	Cd34	1441	0.392064	0.216803	27.6449	9.93089e-07	2.05119e-05	1627.42	1545.67	1491.18	835.097	949.949	1070.67	1906.78	2101.22	2
ENSMUSG00000031389	Arhgap4	292.676	2.99138	0.536506	27.6082	1.01148e-06	2.08702e-05	51.9941	81.2852	61.235	495.899	190.969	111.342	808.935	539.748	2
ENSMUSG00000028465	Tln1	8321.02	0.964226	0.200231	27.5768	1.02747e-06	2.11782e-05	5274.81	5419.84	6184.73	8431.24	10596.3	9151.46	10616.6	10893.2	3
ENSMUSG00000038594	Cep85l	6126.01	-1.41345	0.271547	27.5724	1.02976e-06	2.12034e-05	8631.03	8733.78	8613.72	3944.26	5509.7	7509.82	2819	3246.74	1
ENSMUSG00000067279	Ppp1r3c	7799.46	-1.28734	0.267711	27.5213	1.05641e-06	2.17299e-05	5929.93	9115.19	11103.9	5707.14	14052.4	9545.16	2184.85	4757.04	3
ENSMUSG00000003752	Itpkc	286.372	-0.243871	0.331766	27.515	1.05973e-06	2.17756e-05	162.482	221.346	201.849	515.009	515.127	320.666	170.454	184.042	3
ENSMUSG00000034957	Cebpa	2205.47	-0.875163	0.457305	27.4989	1.06829e-06	2.19291e-05	3514.8	3127.6	3777.29	1657.77	625.791	392.816	2711.38	1836.3	1
ENSMUSG00000042359	Osbpl6	851.288	-0.794451	0.231987	27.4779	1.07955e-06	2.209e-05	1061.98	1424.37	1068.21	430.926	806.967	596.795	556.143	864.917	1
ENSMUSG00000061186	Sfmbt2	70.0736	1.58742	0.552555	27.4764	1.08039e-06	2.209e-05	22.0975	15.0065	28.3495	86.9495	152.775	137.174	67.8928	50.3435	3
ENSMUSG00000032332	Col12a1	2198.3	0.248168	0.261221	27.4815	1.0776e-06	2.209e-05	1364.85	1556.92	1485.51	2400.19	3070.2	4497.34	1485.7	1725.71	3
ENSMUSG00000017715	Pgs1	1086.08	0.771449	0.312852	27.4761	1.08055e-06	2.209e-05	586.234	650.281	565.856	1183.85	1868.56	1836.7	1123.12	873.995	3
ENSMUSG00000040751	Lat2	144.601	3.46036	0.644078	27.4647	1.08671e-06	2.21931e-05	33.7962	33.7646	28.3495	44.908	206.638	127.376	403.023	278.952	2
ENSMUSG00000085440	Sorbs2os	33.942	-2.23958	0.673747	27.4415	1.09938e-06	2.2429e-05	59.7933	77.5335	73.7088	13.3768	7.83463	5.34444	22.3902	11.5542	1
ENSMUSG00000057716	Tmem178b	96.453	-0.992554	0.399764	27.3707	1.13901e-06	2.32137e-05	145.584	148.814	184.839	52.5519	43.0905	36.5203	74.3932	85.8315	1
ENSMUSG00000059866	Tnip2	567.623	0.145799	0.347216	27.3332	1.16056e-06	2.36287e-05	358.76	320.138	335.658	752.925	1225.14	766.927	452.137	329.296	3
ENSMUSG00000030082	Sec61a1	1614.86	0.977189	0.24601	27.3129	1.17244e-06	2.38463e-05	848.804	971.67	1113.57	2213.87	2119.27	1826.91	1999.23	1825.57	3
ENSMUSG00000024892	Pcx	9105.47	-1.47332	0.277294	27.2439	1.21357e-06	2.46579e-05	10821.3	16597.2	11278.6	8440.79	8041.27	8174.31	5188.02	4302.3	1
ENSMUSG00000023150	Ivns1abp	4449.2	-1.15397	0.241511	27.1989	1.24116e-06	2.51929e-05	6799.53	5342.31	6966.04	3829.6	3324.82	3846.21	2428.97	3056.1	1
ENSMUSG00000022221	Ripk3	211.227	2.58191	0.514235	27.1931	1.24481e-06	2.52412e-05	83.1906	53.7733	51.0291	139.501	347.662	227.139	455.748	331.772	2
ENSMUSG00000050592	Fam78a	323.933	1.37698	0.348832	27.1624	1.26405e-06	2.55921e-05	187.179	295.128	269.887	115.614	292.819	197.744	548.92	684.176	2
ENSMUSG00000036461	Elf1	1061.78	1.33456	0.330365	27.1614	1.26468e-06	2.55921e-05	509.543	550.238	538.641	963.133	1683.47	1712.89	1422.14	1114.16	3
ENSMUSG00000029490	Mfsd7a	171.776	2.55402	0.501262	27.1531	1.26994e-06	2.56725e-05	44.195	63.7776	66.9049	93.6379	264.419	267.222	326.463	247.591	3
ENSMUSG00000038366	Lasp1	1801.97	1.41476	0.269772	27.1264	1.287e-06	2.59648e-05	1025.58	995.431	1072.75	2011.3	2079.11	1365.5	3287.02	2579.07	2
ENSMUSG00000032776	Mctp2	214.683	0.892695	0.69726	27.1278	1.28606e-06	2.59648e-05	23.3974	43.7689	88.4505	738.593	398.587	230.701	127.118	66.8495	3
ENSMUSG00000052298	Cdc42se2	833.837	1.06105	0.216269	27.0863	1.31305e-06	2.64104e-05	574.535	669.039	628.225	739.549	759.959	611.047	1316.69	1371.65	2
ENSMUSG00000050896	Rtn4rl2	87.5972	0.169323	0.634165	27.0883	1.31178e-06	2.64104e-05	54.5938	23.7603	19.2777	145.234	201.742	172.803	63.5592	19.8073	3
ENSMUSG00000004508	Gab2	848.177	0.796428	0.227484	27.0881	1.31191e-06	2.64104e-05	664.225	413.929	585.134	1135.12	966.597	1182.9	1021.28	816.224	3
ENSMUSG00000030108	Slc6a13	59.1861	-1.981	0.526627	27.0736	1.32144e-06	2.65049e-05	93.5895	40.0173	226.796	21.0208	12.7313	46.3184	17.3343	15.6807	1
ENSMUSG00000073489	Ifi204	3653.43	2.51931	0.613607	27.0731	1.32173e-06	2.65049e-05	778.612	786.59	758.633	1825.94	9645.41	7332.57	5257.36	2842.34	3
ENSMUSG00000049502	Dtx3l	2690.2	2.4371	0.582702	27.0761	1.31978e-06	2.65049e-05	694.122	630.273	589.67	1484.83	5785.87	5974.19	4162.41	2200.26	3
ENSMUSG00000038127	Ccdc50	3669.87	-0.616072	0.218037	27.068	1.32512e-06	2.65463e-05	5274.81	4869.61	4937.35	2177.56	2775.42	2880.65	3074.68	3368.89	1
ENSMUSG00000018143	Mafk	1533.79	-0.70439	0.32169	27.0505	1.33677e-06	2.67529e-05	1427.24	1025.44	1228.1	1674.97	2502.18	2991.1	704.929	716.363	3
ENSMUSG00000046818	Ddit4l	1516.19	-0.793751	0.37442	27.0183	1.35849e-06	2.71602e-05	2291.64	2978.79	1872.2	460.546	747.228	1050.18	991.668	1737.26	1
ENSMUSG00000024679	Ms4a6d	1165.73	5.49045	1.0072	27.0055	1.36718e-06	2.73067e-05	59.7933	40.0173	48.7612	387.929	2824.38	1647.87	2777.1	1540.01	3
ENSMUSG00000030793	Pycard	211.959	1.58831	0.322168	26.9607	1.3982e-06	2.78983e-05	103.988	106.296	109.996	247.472	244.832	225.357	399.412	258.32	3
ENSMUSG00000025314	Ptprj	1594.51	1.99881	0.403477	26.958	1.40007e-06	2.79077e-05	704.521	512.722	721.212	1227.8	2728.41	1755.65	2761.94	2343.86	3
ENSMUSG00000036986	Pml	1746.6	2.56866	0.647976	26.946	1.40846e-06	2.80469e-05	305.466	337.646	323.185	708.973	4311	4769.02	1998.5	1218.97	3
ENSMUSG00000028249	Sdcbp	4120.88	1.69058	0.36434	26.9089	1.43482e-06	2.85435e-05	1906.89	1834.54	1901.69	3185.6	6834.73	5546.63	6626.05	5130.91	3
ENSMUSG00000061126	Cyp4f39	220.714	-1.65549	0.437047	26.905	1.43767e-06	2.85468e-05	328.863	420.182	409.367	50.6409	179.217	149.644	98.2279	129.573	1
ENSMUSG00000052229	Gpr17	166.373	-1.22661	0.328014	26.9047	1.43784e-06	2.85468e-05	292.467	227.598	272.155	124.214	71.491	130.939	115.562	96.5604	1
ENSMUSG00000024843	Chka	520.07	0.0861885	0.288322	26.8929	1.44635e-06	2.86872e-05	317.164	356.404	376.482	679.353	617.956	1150.84	343.798	318.567	3
ENSMUSG00000008496	Pou2f2	158.702	3.12803	0.596716	26.8718	1.46172e-06	2.89633e-05	58.4934	31.2635	48.7612	56.3739	159.631	86.4017	514.252	314.44	2
ENSMUSG00000060791	Gmfg	173.012	2.15236	0.586665	26.8677	1.46475e-06	2.89945e-05	29.8966	28.7624	69.1728	341.11	379	178.148	197.9	160.109	3
ENSMUSG00000031608	Galnt7	404.602	0.931203	0.315084	26.8599	1.47044e-06	2.90784e-05	235.273	215.093	183.705	523.608	755.062	440.916	496.918	386.242	3
ENSMUSG00000021750	Fam107a	156.73	-2.0017	0.379303	26.8112	1.50672e-06	2.97663e-05	206.677	246.357	256.28	97.4599	137.106	205.761	56.3366	47.8676	1
ENSMUSG00000027762	Sucnr1	31.0671	-0.973954	0.735473	26.7646	1.54222e-06	3.04375e-05	77.9912	32.5141	70.3068	9.55489	0	5.34444	34.6687	18.1567	1
ENSMUSG00000063146	Clip2	425.468	1.06833	0.262542	26.7544	1.55009e-06	3.05627e-05	265.17	246.357	238.136	479.656	568.99	554.931	579.256	471.248	3
ENSMUSG00000022237	Ankrd33b	2468	-1.16414	0.232615	26.7508	1.55291e-06	3.05881e-05	3156.04	2661.15	2794.13	3340.39	2702.95	2430.83	1230.74	1427.77	1
ENSMUSG00000106019	Gm43672	259.269	-1.27628	0.2811	26.7	1.59286e-06	3.1344e-05	270.37	330.143	247.208	286.647	436.781	249.407	119.896	133.699	3
ENSMUSG00000033792	Atp7a	847.763	1.04362	0.231071	26.6762	1.61189e-06	3.16873e-05	491.345	615.266	487.612	923.958	1082.16	939.73	1182.35	1059.69	2
ENSMUSG00000029299	Abcg3	27.7701	5.02603	0.977697	26.6472	1.63548e-06	3.21194e-05	0	5.00216	4.53592	10.5104	24.4832	17.8148	88.8384	70.976	2
ENSMUSG00000044405	Adig	714.325	-2.00386	0.363788	26.5893	1.68346e-06	3.30293e-05	908.598	1146.75	1027.39	672.664	716.869	718.827	351.02	172.488	1
ENSMUSG00000027540	Ptpn1	1571.29	0.997877	0.325541	26.5687	1.70093e-06	3.33393e-05	830.606	765.331	885.639	1626.24	2875.31	2395.2	1789.77	1402.19	3
ENSMUSG00000047409	Ctdspl	713.26	-1.29091	0.306249	26.5508	1.71623e-06	3.36061e-05	1132.17	984.176	1115.84	762.48	375.083	385.69	573.477	377.163	1
ENSMUSG00000027397	Slc20a1	728.328	-1.02164	0.226536	26.5376	1.72759e-06	3.37955e-05	783.812	774.085	833.476	846.563	995.977	793.649	369.077	429.983	3
ENSMUSG00000032575	Manf	802.235	1.2007	0.302284	26.5309	1.73335e-06	3.38749e-05	395.155	455.197	438.851	744.326	1378.89	1077.79	996.724	930.941	3
ENSMUSG00000030643	Rab30	254.395	-0.733905	0.269601	26.52	1.74285e-06	3.40274e-05	404.254	323.89	378.75	182.498	148.858	154.098	216.679	226.133	1
ENSMUSG00000054843	Atrnl1	1333.18	0.1143	0.19902	26.5099	1.75161e-06	3.4165e-05	1035.98	984.176	1059.14	1625.29	1847.01	1953.39	1112.29	1048.13	3
ENSMUSG00000098557	Kctd12	1459.18	0.934932	0.183462	26.4643	1.79201e-06	3.49188e-05	1038.58	1116.73	1158.93	1353.93	1355.39	1591.75	2012.23	2045.93	2
ENSMUSG00000097352	C920009B18Rik	106.793	3.59753	0.646866	26.4491	1.80573e-06	3.51518e-05	16.8981	13.7559	34.0194	83.1276	146.899	62.3518	297.573	199.723	2
ENSMUSG00000003814	Calr	7393.46	1.17511	0.227867	26.4345	1.81899e-06	3.53755e-05	4600.18	4835.84	5413.62	6681.74	8634.74	6783.87	11504.2	10693.4	2
ENSMUSG00000050244	Heatr1	1286.09	0.327185	0.200958	26.4235	1.82898e-06	3.55353e-05	925.496	944.158	902.649	1644.4	1964.53	1492.88	1123.84	1290.77	3
ENSMUSG00000020407	Upp1	208.318	2.62087	0.844267	26.3985	1.85195e-06	3.59466e-05	11.6987	20.0087	41.9573	90.7715	829.491	492.579	126.396	53.6447	3
ENSMUSG00000026621	Marc1	94.9909	-0.532869	0.478141	26.388	1.86176e-06	3.60795e-05	94.8893	143.812	256.28	17.1988	33.2972	57.0073	93.8943	63.5483	1
ENSMUSG00000049550	Clip1	14635.6	-1.12192	0.214888	26.3873	1.86241e-06	3.60795e-05	20143.8	18945.7	17868.1	14770	12593.2	15434.7	8067.69	9261.55	1
ENSMUSG00000059824	Dbp	797.586	0.747408	0.417558	26.383	1.86635e-06	3.61208e-05	867.002	971.67	842.548	223.584	231.122	627.08	1343.41	1274.27	2
ENSMUSG00000056413	Adap1	195.978	2.50049	0.475911	26.3466	1.90071e-06	3.675e-05	62.393	90.0389	74.8427	112.748	230.142	168.35	521.474	307.838	2
ENSMUSG00000103976	Gm37677	570.244	-1.16575	0.32885	26.2449	1.99983e-06	3.8628e-05	978.79	815.353	907.185	291.424	298.695	540.679	322.13	407.699	1
ENSMUSG00000031838	Ifi30	629.919	2.6281	0.493671	26.243	2.0017e-06	3.8628e-05	198.878	208.84	246.074	292.38	987.163	437.353	1483.53	1185.13	2
ENSMUSG00000032382	Snx1	811.326	1.16589	0.227599	26.2321	2.01271e-06	3.88029e-05	575.835	535.231	467.2	839.875	886.292	610.156	1427.19	1148.82	2
ENSMUSG00000109807	Gm45244	166.804	-1.81345	0.535182	26.2012	2.04405e-06	3.93692e-05	296.367	297.629	326.587	136.635	28.4005	54.3351	123.507	70.976	1
ENSMUSG00000026070	Il18r1	92.0703	2.03921	0.608387	26.1733	2.0727e-06	3.98824e-05	15.5982	46.27	6.80389	189.187	179.217	78.3851	133.619	87.4821	3
ENSMUSG00000068227	Il2rb	232.597	4.47881	0.858876	26.1536	2.09325e-06	4.02392e-05	16.8981	35.0151	14.7418	57.3293	647.336	259.205	590.09	240.163	3
ENSMUSG00000036249	Rbm43	349.364	2.33957	0.627032	26.1476	2.09955e-06	4.03214e-05	59.7933	100.043	71.4408	220.718	754.083	941.511	437.692	209.627	3
ENSMUSG00000107971	Gm44260	45.148	2.58611	0.589391	26.1372	2.1105e-06	4.04927e-05	10.3988	7.50325	18.1437	71.6617	57.7804	68.5869	75.1154	51.9941	2
ENSMUSG00000073492	Gm10521	63.479	3.17566	0.681444	26.122	2.12652e-06	4.0761e-05	20.7977	2.50108	11.3398	140.457	74.429	54.3351	114.84	89.1327	2
ENSMUSG00000019254	Ppp1r12c	1100.36	1.06274	0.209903	26.0943	2.15622e-06	4.12907e-05	800.71	782.839	769.973	1182.9	945.052	920.134	1913.28	1488.02	2
ENSMUSG00000109675	Nxpe1-ps	32.4939	5.41321	1.04216	26.063	2.19022e-06	4.19015e-05	0	6.2527	4.53592	5.73293	24.4832	14.2518	115.562	89.1327	2
ENSMUSG00000018507	Trpv2	342.576	2.2945	0.465281	26.0564	2.19743e-06	4.19993e-05	80.5909	92.54	182.571	452.902	549.403	326.011	559.754	496.832	3
ENSMUSG00000048120	Entpd1	991.529	0.142743	0.259682	26.0506	2.2039e-06	4.20827e-05	777.312	556.491	765.437	1433.23	1551.26	1312.06	817.603	718.839	3
ENSMUSG00000011884	Gltp	391.73	1.38992	0.297975	26.0194	2.2385e-06	4.27026e-05	266.47	250.108	292.567	268.492	366.269	258.314	759.822	671.796	2
ENSMUSG00000089940	Gm4117	107.257	0.580697	0.362498	26.0023	2.2577e-06	4.30278e-05	46.7947	58.7754	74.8427	142.368	179.217	194.181	80.1713	81.705	3
ENSMUSG00000055184	Fam72a	31.7982	3.76137	0.78979	25.9943	2.2668e-06	4.31599e-05	7.79912	2.50108	4.53592	28.6647	39.1731	45.4277	75.1154	51.1688	2
ENSMUSG00000110613	Lncbate1	35.0208	-3.64824	0.812491	25.9467	2.32133e-06	4.41562e-05	74.0917	91.2895	60.101	21.0208	7.83463	8.90739	14.4453	2.47591	1
ENSMUSG00000022439	Parvg	93.1251	2.63639	0.512765	25.8971	2.37967e-06	4.52228e-05	23.3974	23.7603	29.4835	144.279	107.726	57.0073	182.733	176.615	2
ENSMUSG00000024644	Cndp2	1788.88	2.09987	0.425025	25.8945	2.38273e-06	4.52378e-05	708.42	780.337	664.513	1208.69	2845.93	1967.64	3804.89	2330.65	2
ENSMUSG00000006345	Ggt1	17.1277	-1.27249	1.47714	25.8686	2.4138e-06	4.57843e-05	2.59971	2.50108	0	106.059	17.6279	5.34444	2.88906	0	3
ENSMUSG00000040488	Ltbp4	2974.56	-0.885353	0.27132	25.8629	2.42071e-06	4.58719e-05	4416.9	4323.12	4366.96	1572.74	1917.53	2747.93	1882.94	2568.34	1
ENSMUSG00000083161	Gm11427	68.1838	4.14511	0.946355	25.8545	2.43093e-06	4.60218e-05	9.09897	2.50108	4.53592	32.4866	140.044	188.837	106.895	61.0724	3
ENSMUSG00000021939	Ctsb	20963.9	1.51024	0.299332	25.8493	2.43719e-06	4.60967e-05	12481.2	13304.5	11420.3	14970.6	23776.1	21537.2	39882.7	30338.9	2
ENSMUSG00000025034	Trim8	1369.94	0.518709	0.184904	25.8411	2.44719e-06	4.6242e-05	931.995	996.681	1038.73	1674.97	1805.88	1703.98	1385.3	1422	3
ENSMUSG00000032508	Myd88	1188.88	1.21954	0.514162	25.7866	2.5148e-06	4.74746e-05	441.95	415.18	359.472	1007.09	3101.53	2325.72	1192.46	667.67	3
ENSMUSG00000036435	Exoc1	620.402	1.13442	0.225107	25.7744	2.53028e-06	4.76317e-05	400.355	416.43	409.367	656.421	671.819	557.603	988.779	862.441	2
ENSMUSG00000050022	Amz1	57.5202	3.03591	0.604149	25.7751	2.52931e-06	4.76317e-05	23.3974	13.7559	9.07185	45.8635	48.9664	53.4444	104.728	160.934	2
ENSMUSG00000039234	Sec24d	844.434	0.76687	0.230993	25.7759	2.52832e-06	4.76317e-05	578.435	516.473	532.971	957.4	1227.1	1078.69	878.995	985.411	3
ENSMUSG00000096727	Psmb9	666.388	3.24241	0.669485	25.745	2.56775e-06	4.82915e-05	98.7889	200.087	92.9864	340.154	1262.35	1189.14	1549.26	598.344	3
ENSMUSG00000039456	Morc3	1252.34	1.63715	0.368539	25.7387	2.5758e-06	4.83973e-05	590.134	568.996	591.938	989.887	1941.03	1904.4	1979	1453.36	3
ENSMUSG00000029669	Tspan12	921.26	-1.22808	0.297319	25.7343	2.58145e-06	4.83993e-05	1321.95	1409.36	1461.7	538.896	560.176	1003.86	598.757	475.374	1
ENSMUSG00000031938	4931406C07Rik	1330.74	-1.80092	0.378528	25.734	2.58185e-06	4.83993e-05	1836.69	2564.86	2032.09	949.756	752.124	1312.06	769.211	429.157	1
ENSMUSG00000033863	Klf9	5254.47	-0.9379	0.183608	25.733	2.58317e-06	4.83993e-05	6655.25	6013.85	7508.09	4679.99	4852.57	5722.11	3119.46	3484.43	1
ENSMUSG00000014813	Stc1	102.354	-1.75053	0.353378	25.6732	2.6616e-06	4.98221e-05	132.585	128.806	120.202	124.214	127.313	106.889	37.5577	41.2651	1
ENSMUSG00000040181	Fmo1	1579.67	-1.54241	0.305963	25.6434	2.7015e-06	5.05216e-05	1970.58	3127.6	1859.73	1404.57	1276.07	1355.71	885.495	757.628	1
ENSMUSG00000029313	Aff1	4320.42	0.0366644	0.271657	25.6411	2.70462e-06	5.05327e-05	2828.48	3047.57	3286.28	4800.38	8180.33	6309.11	3154.13	2957.06	3
ENSMUSG00000042364	Snx18	1259.52	0.324875	0.235687	25.6381	2.70865e-06	5.05606e-05	877.401	881.631	879.969	1470.5	1809.8	2033.56	1129.62	993.664	3
ENSMUSG00000022504	Ciita	195.034	1.8617	0.376605	25.6353	2.71248e-06	5.05848e-05	94.8893	126.305	77.1107	182.498	139.065	114.905	519.308	306.187	2
ENSMUSG00000025935	Tram1	1288.33	1.01824	0.206694	25.6324	2.71646e-06	5.06117e-05	898.199	825.357	899.247	1421.77	1424.92	1231	1726.93	1879.21	2
ENSMUSG00000020484	Xbp1	3940.05	0.185564	0.208022	25.6274	2.72326e-06	5.06913e-05	2788.19	2867.49	3157	5827.53	5367.7	4767.24	3522.48	3222.81	3
ENSMUSG00000078122	F630028O10Rik	574.868	2.98488	0.5867	25.5681	2.80516e-06	5.2167e-05	120.886	58.7754	204.117	1413.17	600.328	425.773	909.33	866.568	2
ENSMUSG00000026991	Pkp4	1170.19	-1.06329	0.209322	25.5604	2.81598e-06	5.23196e-05	1511.73	1206.77	1576.23	1221.12	989.122	1607.78	670.261	578.537	1
ENSMUSG00000026238	Ptma	2151.27	0.694073	0.21803	25.5472	2.83469e-06	5.26183e-05	1384.34	1339.33	1568.3	3143.56	2653.98	2477.15	2427.53	2215.94	3
ENSMUSG00000028469	Npr2	1174.31	-0.808003	0.208542	25.5444	2.83854e-06	5.26407e-05	1565.02	1508.15	1775.81	772.991	920.569	1136.58	819.047	896.279	1
ENSMUSG00000021390	Ogn	1434.78	0.0732633	0.362539	25.5167	2.87815e-06	5.33258e-05	2083.67	1734.5	1910.76	656.421	459.305	969.124	1445.25	2219.24	1
ENSMUSG00000042333	Tnfrsf14	205.153	2.55948	0.505892	25.5112	2.8861e-06	5.33644e-05	66.2925	56.2743	96.3884	119.436	292.819	273.457	454.304	282.253	2
ENSMUSG00000021423	Ly86	277.168	4.12044	0.830352	25.5097	2.88825e-06	5.33644e-05	46.7947	20.0087	22.6796	65.9287	544.507	511.284	577.811	428.332	3
ENSMUSG00000031154	Otud5	1136.56	0.58072	0.244572	25.5103	2.88736e-06	5.33644e-05	737.017	729.065	772.241	1274.62	1700.11	1727.14	1152.01	1000.27	3
ENSMUSG00000034205	Loxl2	393.285	0.767266	0.303069	25.4866	2.92185e-06	5.39354e-05	386.056	366.408	416.171	243.65	199.783	241.39	517.863	774.959	2
ENSMUSG00000034205	Loxl2	393.285	0.767266	0.303069	25.4866	2.92185e-06	5.39354e-05	386.056	366.408	416.171	243.65	199.783	241.39	517.863	774.959	2
ENSMUSG00000030889	Vwa3a	68.2344	-1.88204	0.552382	25.4778	2.9347e-06	5.41225e-05	159.882	67.5292	176.901	28.6647	15.6693	42.7555	23.1124	31.3615	1
ENSMUSG00000035692	Isg15	1521.45	5.59631	1.16497	25.4626	2.95706e-06	5.44847e-05	28.5968	38.7668	35.1534	418.504	4797.73	4268.42	1819.38	765.056	3
ENSMUSG00000023827	Agpat4	202.28	1.41113	0.283924	25.4447	2.98372e-06	5.47413e-05	120.886	130.056	137.212	183.454	189.01	163.896	355.354	338.374	2
ENSMUSG00000078783	Gm9733	70.018	6.70558	1.36037	25.444	2.98469e-06	5.47413e-05	0	0	4.53592	75.4836	201.742	57.8981	149.509	70.976	3
ENSMUSG00000031681	Smad1	803.965	-0.137736	0.266108	25.448	2.9788e-06	5.47413e-05	614.831	591.506	588.536	976.51	1480.74	1062.65	564.81	552.127	3
ENSMUSG00000025348	Itga7	3147.96	0.949128	0.214325	25.447	2.98022e-06	5.47413e-05	2101.86	1999.61	2154.56	3359.5	3816.44	3734.87	3385.25	4631.6	3
ENSMUSG00000048118	Arid4a	806.793	0.754669	0.227801	25.4481	2.97867e-06	5.47413e-05	521.241	523.977	536.373	970.777	1085.1	1048.4	978.667	789.815	3
ENSMUSG00000035711	Dok3	369.154	3.17115	0.645316	25.394	3.06028e-06	5.60762e-05	40.2955	42.5184	89.5845	1075.88	374.104	228.029	646.426	456.392	2
ENSMUSG00000058099	Nfam1	952.499	2.93002	0.60773	25.392	3.06329e-06	5.60797e-05	185.879	91.2895	257.414	2667.73	1157.57	566.51	1349.19	1344.42	2
ENSMUSG00000032754	Slc8b1	535.919	1.39509	0.282963	25.3552	3.1202e-06	5.70693e-05	354.86	280.121	467.2	457.679	454.408	481.89	1079.78	711.411	2
ENSMUSG00000046006	Gapt	35.9189	3.62792	0.767871	25.3505	3.12762e-06	5.71527e-05	10.3988	2.50108	2.26796	51.5964	50.9251	23.1592	66.4483	80.0544	2
ENSMUSG00000097715	Gpr137b-ps	264.333	1.9952	0.385778	25.342	3.14092e-06	5.73433e-05	133.885	90.0389	161.025	272.314	257.563	176.366	566.255	457.218	2
ENSMUSG00000029217	Tec	285.38	1.57915	0.320837	25.334	3.15349e-06	5.75203e-05	140.384	138.81	156.489	324.866	370.186	241.39	499.084	411.826	2
ENSMUSG00000028037	Ifi44	2286.08	7.33353	1.2637	25.3276	3.16361e-06	5.76522e-05	22.0975	35.0151	56.699	270.403	5350.07	5413.91	4917.89	2222.54	3
ENSMUSG00000015766	Eps8	1151.21	1.4661	0.310078	25.3187	3.17765e-06	5.78553e-05	583.634	565.244	692.862	1029.06	1773.56	1231	1729.1	1605.21	3
ENSMUSG00000034786	Gpsm3	167.118	2.26025	0.493397	25.3123	3.18786e-06	5.79882e-05	42.8952	46.27	40.8233	374.552	209.576	88.1832	307.684	226.958	2
ENSMUSG00000025355	Mmp19	1213.09	1.37465	0.428084	25.3083	3.19429e-06	5.80523e-05	431.551	478.957	548.847	1160.92	3046.69	1557.9	1395.41	1084.45	3
ENSMUSG00000026604	Ptpn14	1447.8	-0.680275	0.239631	25.2855	3.23083e-06	5.8663e-05	2146.06	2109.66	1804.16	955.489	904.9	1165.98	1298.63	1197.51	1
ENSMUSG00000025784	Clec3b	811.784	-0.487433	0.299659	25.2813	3.23764e-06	5.87333e-05	1133.47	1065.46	1291.6	565.65	368.228	472.983	694.818	902.056	1
ENSMUSG00000006344	Ggt5	436.359	0.996023	0.241449	25.2325	3.31761e-06	6.01294e-05	284.668	225.097	310.711	658.332	405.442	551.368	626.925	428.332	2
ENSMUSG00000004530	Coro1c	938.498	1.92275	0.368371	25.1966	3.37773e-06	6.11635e-05	423.752	376.413	526.167	1168.56	915.672	581.653	1666.26	1849.5	2
ENSMUSG00000034595	Ppp1r18	856.724	1.1423	0.272079	25.1946	3.38105e-06	6.11683e-05	564.136	382.666	521.631	1216.34	1093.91	837.295	1252.41	985.411	2
ENSMUSG00000036931	Nfkbid	164.218	1.28489	0.454275	25.1371	3.47983e-06	6.28983e-05	70.1921	51.2722	81.6466	191.098	321.22	291.272	190.678	116.368	3
ENSMUSG00000027570	Col9a3	65.0562	0.775898	0.606088	25.1321	3.48852e-06	6.29984e-05	12.9985	27.5119	24.9476	159.567	102.83	114.905	51.2807	26.4097	3
ENSMUSG00000045868	Gvin1	258.811	2.9315	0.679413	25.1222	3.5057e-06	6.32514e-05	45.4949	58.7754	39.6893	109.881	536.672	651.13	382.078	246.765	3
ENSMUSG00000109408	A930037H05Rik	575.542	2.40524	0.689993	25.1123	3.52323e-06	6.35104e-05	90.9897	117.551	88.4505	236.961	1405.34	1793.95	546.754	324.344	3
ENSMUSG00000058794	Nfe2	84.5537	0.626617	0.888756	25.1102	3.52695e-06	6.35201e-05	15.5982	6.2527	20.4117	376.463	141.023	73.0406	12.2785	31.3615	3
ENSMUSG00000040249	Lrp1	25918.7	0.80012	0.16639	25.0904	3.56203e-06	6.4094e-05	19636.9	17601.4	21628.4	27976.7	24954.3	30276.2	36246.8	29029.2	2
ENSMUSG00000053398	Phgdh	392.69	-2.22751	0.412815	25.0174	3.69442e-06	6.64164e-05	534.24	477.707	799.457	501.632	306.53	274.348	115.562	132.048	1
ENSMUSG00000031167	Rbm3	1160.28	1.23325	0.271292	25.0105	3.70714e-06	6.65851e-05	592.733	661.536	746.159	1526.87	1427.86	1127.68	1755.1	1444.28	2
ENSMUSG00000019139	Isyna1	313.768	1.91353	0.391776	24.9884	3.74831e-06	6.72641e-05	97.489	176.326	102.058	464.368	360.393	203.089	598.034	508.386	2
ENSMUSG00000043639	Rbm20	2487.36	-0.951877	0.220538	24.9775	3.76877e-06	6.75706e-05	3852.77	3136.36	3260.2	1868.94	2125.14	2119.07	1706.71	1829.7	1
ENSMUSG00000030657	Xylt1	615.505	0.872567	0.296803	24.9717	3.77976e-06	6.77069e-05	330.163	346.4	343.596	1106.46	834.388	619.955	651.482	691.604	3
ENSMUSG00000028776	Tinagl1	1065.54	-1.01692	0.198788	24.9575	3.80671e-06	6.81286e-05	1354.45	1150.5	1520.67	1196.27	923.507	1110.75	684.706	583.489	1
ENSMUSG00000058022	Adtrp	137.454	-2.5159	0.605454	24.9366	3.84671e-06	6.87828e-05	263.87	286.374	247.208	46.819	43.0905	122.922	67.8928	21.4579	1
ENSMUSG00000115902		83.2229	0.998423	0.508275	24.922	3.87479e-06	6.92228e-05	38.9956	30.013	28.3495	108.926	155.713	176.366	78.7268	48.6929	3
ENSMUSG00000021200	Asb2	9126.05	-1.01289	0.258177	24.9153	3.88784e-06	6.9394e-05	13643.3	12855.6	12967.1	5267.61	7050.19	8727.46	5451.65	7045.61	1
ENSMUSG00000060843	Ctnna3	358.034	-1.32323	0.308901	24.9074	3.9032e-06	6.96058e-05	487.445	675.292	462.664	182.498	324.158	303.742	195.733	232.735	1
ENSMUSG00000035459	Stab2	244.609	-1.43106	0.281075	24.9016	3.91452e-06	6.97454e-05	319.764	320.138	383.286	259.893	203.7	222.685	134.341	113.066	1
ENSMUSG00000103546	Gm37666	63.2887	2.54634	0.731754	24.8856	3.94603e-06	7.02443e-05	9.09897	8.75379	20.4117	73.5727	126.333	146.081	93.172	28.8856	3
ENSMUSG00000063268	Parp10	1576.33	2.26446	0.653461	24.8811	3.9549e-06	7.03395e-05	300.266	367.659	298.237	755.792	3889.89	4345.03	1790.49	863.267	3
ENSMUSG00000022508	Bcl6	1777.68	0.408388	0.269786	24.858	4.00081e-06	7.10928e-05	1210.16	1131.74	1144.19	1966.4	2751.91	3053.45	1579.59	1384.03	3
ENSMUSG00000048490	Nrip1	3733.21	-1.06495	0.215549	24.7876	4.14426e-06	7.35763e-05	4899.15	5404.84	4411.19	3263	3345.39	3864.03	2340.86	2337.26	1
ENSMUSG00000022708	Zbtb20	12636.3	-0.683882	0.202183	24.7832	4.15332e-06	7.36716e-05	17188	17152.4	16660.4	9316.02	9056.83	11029.1	9465.99	11221.6	1
ENSMUSG00000042010	Acacb	18931.5	-1.42045	0.308848	24.7576	4.20677e-06	7.45536e-05	25395.2	36176.9	23629.9	11803.2	15178.6	18700.2	10807.2	9760.85	1
ENSMUSG00000024030	Abcg1	1543.38	2.94092	0.570008	24.732	4.26109e-06	7.54493e-05	516.042	205.089	716.676	813.121	2240.7	1798.4	3684.27	2372.74	2
ENSMUSG00000031609	Sap30	249.974	1.06251	0.376604	24.7079	4.31271e-06	7.62957e-05	137.784	121.302	97.5224	257.982	479.871	393.707	243.403	268.223	3
ENSMUSG00000026069	Il1rl1	361.073	1.20682	0.343145	24.7045	4.31992e-06	7.63556e-05	184.579	150.065	205.251	496.854	594.452	407.959	496.195	353.23	3
ENSMUSG00000072889	Nfxl1	651.347	1.30227	0.353604	24.6976	4.33498e-06	7.65427e-05	314.565	320.138	331.122	590.492	1102.72	1048.4	847.215	656.116	3
ENSMUSG00000053110	Yap1	2118.3	-0.283186	0.214165	24.6961	4.33817e-06	7.65427e-05	1796.4	1765.76	1780.35	2523.45	3430.59	2650.84	1378.08	1620.89	3
ENSMUSG00000026088	Mitd1	264.837	1.9434	0.576772	24.6127	4.52298e-06	7.97329e-05	76.6914	76.283	63.5029	186.32	573.887	629.753	319.963	192.296	3
ENSMUSG00000079355	Ackr4	120.944	-1.63869	0.464903	24.6078	4.53393e-06	7.98555e-05	215.776	231.35	173.499	108.926	39.1731	40.974	96.7834	61.0724	1
ENSMUSG00000025076	Casp7	325.129	1.26335	0.395075	24.5578	4.6488e-06	8.18065e-05	124.786	168.823	156.489	304.801	604.246	583.434	377.022	281.428	3
ENSMUSG00000024542	Cep192	400	1.26854	0.256367	24.5397	4.69103e-06	8.24771e-05	292.467	220.095	210.92	487.299	419.153	279.692	679.65	610.724	2
ENSMUSG00000019832	Rab32	424.046	1.67278	0.397888	24.5172	4.74403e-06	8.33356e-05	184.579	131.307	207.519	637.311	673.778	377.673	711.43	468.772	2
ENSMUSG00000030084	Plxna1	1387.47	1.24414	0.251002	24.5107	4.75968e-06	8.35369e-05	812.408	970.42	889.041	1121.74	1795.11	1192.7	2137.9	2180.45	2
ENSMUSG00000028405	Aco1	1566.68	-0.957798	0.251788	24.4726	4.85122e-06	8.50689e-05	2045.97	2601.12	2050.24	1233.54	1059.63	1215.86	1269.02	1058.04	1
ENSMUSG00000002458	Rgs19	257.187	1.72258	0.369939	24.4699	4.85775e-06	8.51086e-05	118.287	96.2916	123.604	468.19	243.853	216.45	438.414	352.404	2
ENSMUSG00000069662	Marcks	3109.02	1.38661	0.292486	24.46	4.88179e-06	8.53799e-05	1812	1635.71	1910.76	2597.97	4311.98	3464.98	4886.84	4251.96	2
ENSMUSG00000059714	Flot1	1690.28	0.509559	0.210608	24.4617	4.87758e-06	8.53799e-05	1191.97	1105.48	1270.06	2025.64	2387.6	2217.05	1746.43	1577.98	3
ENSMUSG00000079017	Ifi27l2a	1913.19	2.10478	0.414687	24.4513	4.90304e-06	8.56766e-05	811.109	710.307	986.563	1315.71	2808.71	1555.23	4144.35	2973.57	2
ENSMUSG00000112239	AC153524.3	159.933	-1.59896	0.347921	24.4485	4.90982e-06	8.57201e-05	271.669	240.104	230.198	103.193	122.416	153.207	73.6709	85.0062	1
ENSMUSG00000082319	Gm8822	158.868	2.34828	0.4749	24.4445	4.91975e-06	8.58184e-05	51.9941	57.5249	79.3787	87.905	238.956	197.744	298.295	259.145	2
ENSMUSG00000041957	Pkp2	221.472	-1.33521	0.277484	24.4296	4.9566e-06	8.63859e-05	358.76	208.84	401.429	206.386	146.899	222.685	134.341	92.4339	1
ENSMUSG00000029095	Ablim2	1382.04	0.0582522	0.226947	24.3961	5.04019e-06	8.77661e-05	977.49	1084.22	1029.65	1608.09	2462.03	1663.9	988.057	1242.91	3
ENSMUSG00000031209	Heph	225.515	-1.38869	0.310771	24.3906	5.05424e-06	8.79341e-05	343.161	323.89	348.132	230.273	133.189	163.005	144.453	118.018	1
ENSMUSG00000096140	Ankrd66	14.5782	6.98712	1.56984	24.3852	5.06772e-06	8.80918e-05	0	0	0	17.1988	15.6693	32.0666	36.8355	14.8554	3
ENSMUSG00000028843	Sh3bgrl3	374.785	1.97936	0.390739	24.3742	5.09588e-06	8.85043e-05	133.885	146.313	218.858	412.771	493.582	284.146	608.868	699.857	2
ENSMUSG00000041926	Rnpep	842.425	1.405	0.321407	24.3683	5.11073e-06	8.86851e-05	422.452	475.206	447.922	799.744	1160.5	1118.77	1383.86	930.941	3
ENSMUSG00000026433	Rab29	208.372	1.80502	0.391463	24.3475	5.16429e-06	8.95368e-05	98.7889	98.7927	88.4505	169.122	282.047	282.364	367.632	279.778	3
ENSMUSG00000079018	Ly6c1	3601.7	2.18638	0.445037	24.3429	5.17615e-06	8.96645e-05	1606.62	1438.12	1432.22	2170.87	4679.23	4125.01	8857.84	4503.68	2
ENSMUSG00000038178	Slc43a2	1797.71	1.2471	0.250515	24.3247	5.22335e-06	9.04038e-05	1163.37	1056.71	1366.45	2031.37	1629.6	1468.83	2912.17	2753.21	2
ENSMUSG00000108067	Gm43953	271.121	-1.39114	0.380351	24.2971	5.29614e-06	9.1505e-05	592.733	386.417	353.802	168.166	114.581	227.139	184.177	141.952	1
ENSMUSG00000029718	Pcolce	1031.67	0.795746	0.247473	24.2984	5.29258e-06	9.1505e-05	913.797	1014.19	919.659	732.86	633.626	758.019	1401.19	1880.04	2
ENSMUSG00000032724	Abtb2	543.537	-0.229756	0.328961	24.2933	5.3061e-06	9.15979e-05	389.956	367.659	381.018	548.451	985.205	1062.65	293.961	319.392	3
ENSMUSG00000108732	2310043P16Rik	77.5921	1.94925	0.746328	24.2623	5.38897e-06	9.29481e-05	11.6987	17.5076	14.7418	67.8397	155.713	258.314	69.3373	25.5844	3
ENSMUSG00000018927	Ccl6	1867.86	2.91728	0.549411	24.2179	5.50984e-06	9.49509e-05	458.848	310.134	557.919	3891.71	1663.88	875.597	3264.63	3920.19	2
ENSMUSG00000041219	Arhgap11a	138.412	1.9902	0.450275	24.2082	5.53689e-06	9.53348e-05	38.9956	63.7776	45.3592	248.427	150.817	123.813	205.845	230.259	2
ENSMUSG00000004446	Bid	199.248	1.95099	0.471119	24.1796	5.61656e-06	9.66232e-05	75.3915	58.7754	80.5126	214.985	360.393	243.172	367.632	193.121	3
ENSMUSG00000022146	Osmr	2481.49	-0.661058	0.344771	24.1682	5.64861e-06	9.70909e-05	2276.04	1727	1823.44	2673.46	4492.18	4451.92	1356.41	1051.44	3
ENSMUSG00000030966	Trim21	532.814	2.12151	0.601534	24.1657	5.65558e-06	9.71273e-05	124.786	172.575	102.058	306.712	1211.43	1306.71	630.536	407.699	3
ENSMUSG00000024776	Stambpl1	177.921	0.810186	0.319876	24.1283	5.76244e-06	9.88773e-05	100.089	106.296	86.1825	315.311	224.266	222.685	216.679	151.856	3
ENSMUSG00000027087	Itgav	1969.94	0.717392	0.181629	24.1054	5.82889e-06	9.99318e-05	1687.21	1783.27	1810.97	1434.19	1642.33	1793.95	2646.37	2961.19	2
ENSMUSG00000041426	Hibch	1324.26	-1.30332	0.263816	24.0997	5.84537e-06	0.000100128	1739.2	2042.13	1632.93	1112.19	1147.77	1491.1	756.932	671.796	1
ENSMUSG00000024986	Hhex	109.344	1.91922	0.444468	24.0834	5.8932e-06	0.000100861	50.6943	27.5119	54.4311	115.614	160.61	161.224	155.287	149.38	3
ENSMUSG00000028059	Arhgef2	1511.16	1.05053	0.213813	24.0759	5.91553e-06	0.000101157	1022.98	1036.7	1154.39	1661.6	1375.96	1399.35	2448.47	1989.8	2
ENSMUSG00000092323	BB365896	140.472	-0.579711	0.430187	24.0739	5.92126e-06	0.000101168	271.669	171.324	146.284	114.659	28.4005	39.1925	273.016	79.229	1
ENSMUSG00000075419	Dolk	633.068	-0.608552	0.201262	24.0716	5.92816e-06	0.000101199	830.606	846.616	857.29	445.258	487.706	508.612	533.031	555.429	1
ENSMUSG00000026646	Suv39h2	75.4118	1.65506	0.410564	24.0631	5.95325e-06	0.000101541	33.7962	31.2635	30.6175	101.282	104.788	95.3091	93.172	113.066	2
ENSMUSG00000022469	Rapgef3	432.635	-1.01048	0.218322	24.0567	5.97257e-06	0.000101726	581.035	527.728	653.173	397.483	334.93	410.631	301.906	254.193	1
ENSMUSG00000033467	Crlf2	240.319	1.66635	0.373355	24.0561	5.9743e-06	0.000101726	111.787	93.7906	140.614	230.273	349.62	315.322	397.245	283.904	3
ENSMUSG00000037820	Tgm2	6525.32	0.544364	0.444835	24.0079	6.12012e-06	0.00010412	3089.75	2789.96	3550.49	6772.51	15041.5	12289.5	5757.16	2911.67	3
ENSMUSG00000030329	Pianp	120.279	1.74619	0.388605	24.0059	6.12615e-06	0.000104134	94.8893	51.2722	68.0389	91.727	89.1189	66.8054	258.57	241.814	2
ENSMUSG00000021624	Cd180	651.04	6.0011	1.10269	23.9537	6.28811e-06	0.000106796	36.3959	27.5119	23.8136	85.994	849.078	545.132	2296.8	1343.59	2
ENSMUSG00000049191	Rgag4	122.373	1.84387	0.384451	23.9241	6.38187e-06	0.000108297	63.6928	50.0216	74.8427	104.148	109.685	180.82	245.57	150.205	3
ENSMUSG00000108478	Gm19514	95.1362	-2.49216	0.580095	23.898	6.46574e-06	0.000109627	154.683	237.603	147.418	76.4391	25.4625	50.7721	39.0022	29.7109	1
ENSMUSG00000102336	Gm37233	121.37	2.10403	0.458303	23.8857	6.50574e-06	0.000110211	41.5953	48.7711	43.0913	114.659	204.68	118.468	235.458	164.235	3
ENSMUSG00000055116	Arntl	368.338	-0.427367	0.343796	23.8489	6.62638e-06	0.00011216	271.669	268.866	267.619	718.528	554.3	434.681	171.899	259.145	3
ENSMUSG00000030325	Klrb1c	26.2435	6.50384	1.42781	23.8449	6.63982e-06	0.000112292	0	2.50108	0	7.64391	62.677	24.05	57.7811	55.2953	3
ENSMUSG00000036225	Kctd1	224.159	-0.146174	0.420807	23.8309	6.68642e-06	0.000112985	132.585	136.309	123.604	237.917	371.166	577.199	116.284	98.211	3
ENSMUSG00000070427	Il18bp	446.422	2.73161	0.55674	23.8264	6.70129e-06	0.00011314	115.687	147.564	150.819	230.273	707.075	584.325	1117.34	518.29	2
ENSMUSG00000028164	Manba	256.355	1.19439	0.291394	23.8121	6.74941e-06	0.000113853	210.576	170.074	197.313	231.228	174.32	147.863	473.805	445.663	2
ENSMUSG00000060550	H2-Q7	563.591	3.01214	0.596104	23.8105	6.75489e-06	0.000113853	146.883	151.315	148.551	244.605	955.825	490.797	1616.43	754.327	2
ENSMUSG00000060550	H2-Q7	563.591	3.01214	0.596104	23.8105	6.75489e-06	0.000113853	146.883	151.315	148.551	244.605	955.825	490.797	1616.43	754.327	2
ENSMUSG00000024677	Ms4a6b	1494.74	6.08089	1.08863	23.7814	6.85378e-06	0.000115422	46.7947	33.7646	130.408	365.952	3222.97	1941.81	3869.89	2346.34	3
ENSMUSG00000027423	Snx5	2048.49	1.15409	0.237521	23.7568	6.93871e-06	0.000116754	1467.53	1324.32	1461.7	1790.59	2213.28	1673.7	3438.7	3018.13	2
ENSMUSG00000021136	Smoc1	1209.89	-1.60998	0.399264	23.7473	6.97172e-06	0.000117211	1849.69	1933.34	2266.83	654.51	742.331	939.73	935.332	357.356	1
ENSMUSG00000109953	5430430B14Rik	62.7592	-2.26372	0.458638	23.7404	6.99591e-06	0.000117518	94.8893	77.5335	81.6466	92.6824	52.8837	65.9147	21.6679	14.8554	1
ENSMUSG00000021763	BC067074	219.15	-1.21282	0.31688	23.7135	7.0906e-06	0.000119009	331.463	345.149	331.122	129.947	158.651	174.585	161.787	120.494	1
ENSMUSG00000041775	Mapk1ip1	503.196	-1.16705	0.246214	23.7093	7.10534e-06	0.000119156	724.018	669.039	673.585	472.967	372.145	518.41	298.295	297.109	1
ENSMUSG00000022357	Klhl38	629.634	-1.45798	0.292435	23.6805	7.20849e-06	0.000120785	848.804	660.286	933.266	726.172	430.905	920.134	254.237	263.272	1
ENSMUSG00000029322	Plac8	2268.29	4.67484	0.987411	23.6644	7.26669e-06	0.000121658	146.883	127.555	140.614	767.258	6105.13	4481.31	3965.23	2412.36	3
ENSMUSG00000024507	Hsd17b4	2763.81	-1.02455	0.21961	23.6533	7.30732e-06	0.000122133	3551.2	3826.66	3722.86	2213.87	2237.77	3120.26	1679.99	1757.89	1
ENSMUSG00000029470	P2rx4	1110.02	2.11939	0.435014	23.6549	7.3015e-06	0.000122133	509.543	513.972	475.138	646.866	1254.52	1299.59	2739.55	1440.98	2
ENSMUSG00000022586	Ly6i	56.5884	4.28867	0.875223	23.5768	7.59204e-06	0.000126786	6.49927	8.75379	4.53592	27.7092	77.367	66.8054	200.789	60.2471	2
ENSMUSG00000068392	Rnase13	110.001	-1.50396	0.445852	23.568	7.62545e-06	0.000127237	113.087	117.551	65.7709	114.659	249.729	141.628	34.6687	42.9157	3
ENSMUSG00000021754	Map3k1	1666.95	1.07336	0.243023	23.524	7.79511e-06	0.00012996	1082.78	1016.69	972.956	2082.01	2024.27	1496.44	2765.55	1894.89	3
ENSMUSG00000024063	Lbh	523.645	1.69869	0.34824	23.446	8.10512e-06	0.000135016	280.768	250.108	341.328	654.51	376.062	328.683	1092.79	864.917	2
ENSMUSG00000105442	Gm42614	53.9943	-2.53988	0.673057	23.4151	8.23162e-06	0.000137008	113.087	131.307	81.6466	10.5104	21.5452	39.1925	17.3343	17.3314	1
ENSMUSG00000051435	Fhad1	24.1944	3.43284	1.0658	23.4093	8.25529e-06	0.000137288	0	5.00216	1.13398	54.4629	57.7804	17.8148	14.4453	42.9157	3
ENSMUSG00000114310	CT009480.2	143.338	-1.68747	0.357517	23.3969	8.30668e-06	0.000138028	244.372	220.095	182.571	140.457	91.0776	129.157	84.5049	54.47	1
ENSMUSG00000001034	Mapk7	218.158	1.58651	0.337521	23.3302	8.5882e-06	0.000142587	106.588	102.544	122.47	268.492	259.522	194.181	405.912	285.555	2
ENSMUSG00000000078	Klf6	4615.85	0.466759	0.26637	23.3271	8.60149e-06	0.000142689	3139.15	2766.2	3192.16	4808.98	7534.95	7465.29	3981.84	4038.21	3
ENSMUSG00000041084	Ostc	501.692	1.25389	0.26873	23.3229	8.6198e-06	0.000142874	280.768	308.884	286.897	558.006	672.799	399.051	745.376	761.754	2
ENSMUSG00000020741	Cluh	5395.8	-0.914256	0.215736	23.3158	8.65047e-06	0.000143264	6949.02	7604.54	7362.94	3629.9	4659.65	5593.84	3489.26	3877.27	1
ENSMUSG00000055775	Myh8	2307.14	-0.969173	0.236049	23.3112	8.67042e-06	0.00014343	3182.04	3408.97	2926.8	1651.09	2050.71	1850.07	1281.3	2106.17	1
ENSMUSG00000111818	AC114645.5	13.3182	7.17623	1.56697	23.3102	8.67488e-06	0.00014343	0	0	0	14.3323	8.81396	8.90739	50.5585	23.9338	2
ENSMUSG00000015143	Actn1	926.765	0.228517	0.285465	23.3051	8.69699e-06	0.000143677	803.309	476.456	616.886	1521.14	1205.55	1339.67	681.095	770.007	3
ENSMUSG00000032633	Flcn	1448.4	-0.494953	0.199646	23.2789	8.81147e-06	0.000145447	1999.17	1779.52	1906.22	1217.29	925.466	1092.94	1353.52	1313.06	1
ENSMUSG00000027641	Rbl1	314.801	2.01425	0.529293	23.2529	8.92669e-06	0.000147228	114.387	63.7776	129.274	204.475	576.825	741.095	368.355	320.217	3
ENSMUSG00000020476	Dbnl	1218.78	1.65804	0.456377	23.2506	8.93709e-06	0.000147278	473.147	538.983	417.305	931.602	2387.6	2117.29	1753.66	1130.66	3
ENSMUSG00000025584	Pde8a	860.355	-0.558178	0.203757	23.1823	9.24767e-06	0.00015227	1003.49	1169.26	1281.4	504.498	694.344	774.943	654.371	800.544	1
ENSMUSG00000057058	Skap1	30.508	5.07205	1.16969	23.1685	9.31139e-06	0.000153193	0	2.50108	2.26796	24.8427	88.1396	28.5037	60.6702	37.1386	3
ENSMUSG00000027217	Tspan18	304.592	-1.6132	0.5373	23.1438	9.42752e-06	0.000154889	535.54	812.852	314.113	142.368	85.2016	132.72	291.795	122.145	1
ENSMUSG00000097899	Gm16894	64.1389	0.414888	0.771712	23.1432	9.43e-06	0.000154889	15.5982	7.50325	43.0913	182.498	109.685	105.107	39.7245	9.90363	3
ENSMUSG00000079105	C7	97.4311	-1.70439	0.409083	23.1288	9.49823e-06	0.000155842	159.882	150.065	172.365	55.4184	82.2636	57.0073	39.7245	62.723	1
ENSMUSG00000111344	AL669916.5	11.5838	4.31979	1.67351	23.1277	9.50361e-06	0.000155842	0	0	0	16.2433	41.1318	24.05	2.16679	9.07833	3
ENSMUSG00000039031	Arhgap18	360.686	1.52698	0.35268	23.1242	9.5202e-06	0.000155986	298.966	168.823	227.93	412.771	193.907	167.459	773.545	642.085	2
ENSMUSG00000029009	Mthfr	980.78	2.07662	0.490257	23.1137	9.57045e-06	0.000156424	321.064	357.655	382.152	597.181	1910.67	1595.31	1637.37	1044.83	3
ENSMUSG00000008384	Sertad1	389.332	0.691985	0.368544	23.1162	9.55851e-06	0.000156424	184.579	185.08	263.084	412.771	837.326	596.795	321.407	313.615	3
ENSMUSG00000113669	AC163354.1	40.9215	2.29048	0.830147	23.1149	9.5644e-06	0.000156424	2.59971	6.2527	9.07185	131.857	65.615	45.4277	42.6136	23.9338	3
ENSMUSG00000042485	Mustn1	4938.13	2.04963	0.517323	23.0872	9.69809e-06	0.000158381	1600.12	1188.01	1448.09	12301	6125.7	3457.85	4417.37	8966.91	2
ENSMUSG00000034908	Sidt2	3059.17	-0.345929	0.198859	23.0756	9.75445e-06	0.000159171	2542.51	2821.22	2796.4	4357.99	3917.31	3703.69	2234.68	2099.57	3
ENSMUSG00000036412	Arsi	250.718	1.27582	0.320014	23.0667	9.79797e-06	0.000159751	157.282	116.3	132.676	262.759	350.6	337.59	313.462	335.073	3
ENSMUSG00000000385	Tmprss2	73.5837	1.64087	0.966359	23.0618	9.82179e-06	0.000160009	0	15.0065	18.1437	154.789	109.685	243.172	34.6687	13.2048	3
ENSMUSG00000022490	Ppp1r1a	1241.68	-1.07278	0.218109	23.0538	9.86141e-06	0.000160392	1468.83	1690.73	1494.59	1065.37	1546.36	1157.96	733.82	775.784	1
ENSMUSG00000089714	Gm16092	14.767	5.55709	1.64991	23.0539	9.86053e-06	0.000160392	0	0	0	15.2878	40.1525	44.537	11.5562	6.60242	3
ENSMUSG00000038028	Tigar	1897.03	-0.264889	0.273443	23.047	9.89484e-06	0.000160805	2604.91	2492.33	2482.28	837.964	1254.52	1459.92	1779.66	2264.63	1
ENSMUSG00000026387	Sctr	140.04	-1.5818	0.322451	23.0276	9.99133e-06	0.000162241	167.681	205.089	217.724	131.857	124.375	148.753	56.3366	68.5001	1
ENSMUSG00000067203	H2-K2	314.345	1.8369	0.495981	23.0072	1.00938e-05	0.000163772	100.089	131.307	107.728	242.694	589.556	608.375	459.36	275.651	3
ENSMUSG00000031903	Pla2g15	452.169	1.32913	0.28068	23.0055	1.01024e-05	0.000163778	301.566	288.875	267.619	485.388	385.855	285.037	975.778	627.23	2
ENSMUSG00000025171	Ubtd1	404.67	0.557312	0.235848	22.9862	1.02003e-05	0.000165232	244.372	290.125	284.629	492.077	616.977	502.377	384.244	422.555	3
ENSMUSG00000028565	Nfia	3155.68	-0.772482	0.24725	22.9516	1.03784e-05	0.000167844	4410.4	4799.58	4000.68	2580.78	1849.95	2405	2571.26	2627.76	1
ENSMUSG00000039616	Mocos	357.249	0.776301	0.284124	22.952	1.03762e-05	0.000167844	243.073	176.326	241.538	463.412	470.078	537.116	444.192	282.253	3
ENSMUSG00000052681	Rap1b	2647.1	1.324	0.288195	22.9494	1.03894e-05	0.000167886	1552.03	1529.41	1587.57	2235.84	3692.07	2803.16	4212.24	3564.48	2
ENSMUSG00000020707	Rnf135	178.859	2.50238	0.614219	22.9216	1.05353e-05	0.000170106	35.096	66.2787	39.6893	115.614	356.476	358.077	295.406	164.235	3
ENSMUSG00000035637	Grhpr	564.404	-0.910459	0.21067	22.9029	1.0634e-05	0.000171561	700.621	814.102	749.561	470.101	499.458	476.546	403.745	401.097	1
ENSMUSG00000043131	Mob1a	2055.2	1.17897	0.271091	22.8657	1.08339e-05	0.000174646	1260.86	1229.28	1237.17	1894.73	2848.87	2352.44	3074.68	2543.58	3
ENSMUSG00000033318	Gstt2	211.394	-0.436689	0.283961	22.8572	1.08798e-05	0.000175243	317.164	243.855	324.319	155.745	97.9329	137.174	221.013	193.946	1
ENSMUSG00000034342	Cbl	2208.41	0.741966	0.237571	22.8413	1.09669e-05	0.000176504	1455.84	1376.85	1360.78	3278.28	3070.2	2043.36	2674.54	2407.41	3
ENSMUSG00000052276	Ostn	33.3403	-1.7808	0.628811	22.8276	1.10422e-05	0.000177573	37.6958	55.0238	107.728	4.77745	8.81396	27.6129	9.38943	15.6807	1
ENSMUSG00000026980	Ly75	55.5859	2.70559	0.694778	22.8226	1.10697e-05	0.000177873	6.49927	13.7559	14.7418	63.0623	130.251	74.8221	89.5607	51.9941	3
ENSMUSG00000027533	Fabp5	658.393	1.50863	0.324527	22.789	1.12574e-05	0.000180742	395.155	501.467	331.122	437.614	673.778	494.36	1401.19	1032.45	2
ENSMUSG00000013974	Mcemp1	148.499	2.1961	0.832974	22.7767	1.13265e-05	0.000181706	5.19941	21.2592	45.3592	407.994	386.835	134.502	96.0611	90.7833	3
ENSMUSG00000025779	Ly96	60.6532	2.26249	0.483437	22.7535	1.14586e-05	0.000183555	23.3974	33.7646	14.7418	55.4184	58.7597	49.8814	121.34	127.922	2
ENSMUSG00000035273	Hpse	236.966	3.10736	0.653884	22.7533	1.14601e-05	0.000183555	80.5909	38.7668	57.833	88.8605	351.579	316.212	575.644	386.242	2
ENSMUSG00000052310	Slc39a1	2442.21	0.846213	0.257005	22.7267	1.16133e-05	0.000185859	1542.93	1605.69	1440.16	2557.84	3714.59	3125.6	3008.95	2541.93	3
ENSMUSG00000040648	Ppip5k2	502.655	1.21247	0.277351	22.7138	1.16888e-05	0.000186918	263.87	292.627	344.73	566.605	644.398	544.242	754.043	610.724	3
ENSMUSG00000033685	Ucp2	2958.82	1.67075	0.357425	22.7118	1.17002e-05	0.00018695	1241.36	1221.78	1788.29	4767.89	3054.53	2437.95	5013.23	4145.49	2
ENSMUSG00000071847	Apcdd1	476.89	-0.0333352	0.410175	22.6996	1.17716e-05	0.000187942	768.213	472.704	641.833	409.905	110.664	155.879	712.874	543.049	1
ENSMUSG00000039747	Orai2	179.414	2.0356	0.446646	22.6904	1.18264e-05	0.000188664	67.5924	50.0216	74.8427	311.489	223.287	123.813	335.853	248.416	2
ENSMUSG00000060441	Trim5	68.97	2.48983	0.566576	22.6792	1.18926e-05	0.00018957	23.3974	17.5076	23.8136	51.5964	101.85	115.796	127.841	89.958	3
ENSMUSG00000029675	Eln	1078.56	-0.775857	0.311106	22.677	1.19058e-05	0.000189629	1793.8	1384.35	1622.73	843.697	481.83	703.684	803.88	994.49	1
ENSMUSG00000022864	D16Ertd472e	419.568	-0.118136	0.401087	22.6475	1.20827e-05	0.000192293	241.773	283.873	244.94	407.994	807.946	933.495	243.403	193.121	3
ENSMUSG00000048371	Pdp2	624.053	-1.49295	0.44052	22.6274	1.22044e-05	0.000193925	1142.57	1121.74	920.792	214.03	329.054	564.729	418.913	280.603	1
ENSMUSG00000031875	Cmtm3	425.827	1.83104	0.377585	22.6258	1.22143e-05	0.000193925	250.872	140.061	283.495	371.685	476.933	380.346	807.491	695.73	2
ENSMUSG00000005686	Ampd3	1196.21	0.578285	0.348067	22.6259	1.22135e-05	0.000193925	662.925	557.741	785.849	2464.21	1779.44	1239.91	1042.23	1037.41	3
ENSMUSG00000005483	Dnajb1	600.929	-0.145949	0.243118	22.6164	1.22717e-05	0.00019468	441.95	571.497	412.769	817.899	879.437	794.539	465.138	424.206	3
ENSMUSG00000025732	Mcrip2	681.55	-1.36699	0.315669	22.6054	1.23394e-05	0.000195342	896.899	1091.72	1030.79	335.377	564.093	819.48	288.183	425.856	1
ENSMUSG00000047996	Prrg1	174.535	-0.0259991	0.279335	22.6049	1.23427e-05	0.000195342	218.375	212.592	232.466	100.326	99.8915	110.452	199.345	222.832	1
ENSMUSG00000024556	Me2	255.168	1.72991	0.372	22.6075	1.23269e-05	0.000195342	137.784	106.296	138.346	203.519	350.6	278.801	440.581	385.416	2
ENSMUSG00000002588	Pon1	111.054	-2.2393	0.612738	22.5989	1.23799e-05	0.000195746	88.39	100.043	537.507	15.2878	41.1318	60.5703	28.1683	17.3314	1
ENSMUSG00000025132	Arhgdia	3340.29	0.962844	0.21149	22.5976	1.23878e-05	0.000195746	2308.54	2217.21	2346.21	3424.47	4096.53	3220.02	4717.1	4392.26	2
ENSMUSG00000089832	Shkbp1	155.499	1.74115	0.372323	22.5794	1.25013e-05	0.000197382	63.6928	87.5379	60.101	202.564	181.176	107.779	308.407	232.735	2
ENSMUSG00000040312	Cchcr1	115.677	0.717624	0.373308	22.5645	1.25947e-05	0.0001987	57.1936	71.2808	54.4311	168.166	218.39	140.737	117.007	98.211	3
ENSMUSG00000062488	Ifit3b	2968.79	5.62613	1.26003	22.5604	1.26204e-05	0.000198949	41.5953	80.0346	39.6893	685.086	8130.39	10810	2808.88	1154.6	3
ENSMUSG00000003644	Rps6ka1	374.867	2.0498	0.423047	22.5546	1.26568e-05	0.000199198	136.485	162.57	116.8	659.287	284.985	187.055	878.995	572.76	2
ENSMUSG00000107390	Gm43323	150.402	1.47278	0.372158	22.5532	1.2666e-05	0.000199198	59.7933	92.54	60.101	223.584	179.217	170.131	223.902	193.946	2
ENSMUSG00000023272	Creld2	439.911	1.46992	0.395586	22.5532	1.26661e-05	0.000199198	184.579	220.095	200.715	422.326	795.215	595.905	668.816	431.633	3
ENSMUSG00000057110	Cntrl	774.28	0.806111	0.222053	22.5419	1.27379e-05	0.000200101	526.441	496.465	528.435	962.178	955.825	894.302	1035	795.592	2
ENSMUSG00000028633	Ctps	847.087	0.121604	0.264151	22.541	1.27436e-05	0.000200101	566.736	599.009	655.441	923.958	1527.75	1212.3	625.48	666.019	3
ENSMUSG00000006403	Adamts4	785.044	-2.08037	0.688162	22.5282	1.28251e-05	0.000201222	531.64	417.681	375.348	398.439	2207.41	2153.81	130.007	66.0242	3
ENSMUSG00000028159	Dapp1	248.126	1.3453	0.337769	22.5117	1.29314e-05	0.000202731	144.284	102.544	140.614	302.89	346.682	285.927	397.967	264.097	3
ENSMUSG00000034958	Atcay	258.202	-0.21783	0.257897	22.4838	1.3113e-05	0.000205417	289.867	385.167	325.453	161.478	168.445	150.535	263.626	321.043	1
ENSMUSG00000042351	Grap2	76.6121	2.91417	0.603426	22.45	1.33364e-05	0.000208753	16.8981	15.0065	30.6175	76.4391	105.767	69.4777	197.178	101.512	2
ENSMUSG00000020641	Rsad2	22559.3	5.22085	1.41587	22.4422	1.33886e-05	0.000209405	181.979	100.043	148.551	3131.14	67250.5	100605	6524.93	2532.03	3
ENSMUSG00000035948	Acss3	615.741	-1.97092	0.425237	22.4405	1.34e-05	0.000209419	863.103	1180.51	907.185	651.644	305.551	451.605	392.189	174.139	1
ENSMUSG00000106609	Gm43181	77.0014	2.60642	0.904039	22.4064	1.36307e-05	0.000212858	1.29985	10.0043	19.2777	258.938	117.519	103.326	46.2249	59.4218	3
ENSMUSG00000026399	Cd55	1055.32	-0.396063	0.236922	22.397	1.36951e-05	0.000213625	1441.54	1380.6	1356.24	628.712	746.248	772.271	884.773	1232.18	1
ENSMUSG00000024810	Il33	829.329	-0.400933	0.408272	22.3961	1.37012e-05	0.000213625	595.333	526.478	489.88	757.703	1886.19	1574.83	408.079	396.145	3
ENSMUSG00000035248	Zcchc6	2801.36	0.629717	0.320245	22.3787	1.38205e-05	0.000215317	1648.21	1616.95	1705.51	2718.37	4666.5	5287.43	2619.65	2148.26	3
ENSMUSG00000060961	Slc4a4	2545.72	-1.60611	0.428103	22.3427	1.40716e-05	0.000219058	4104.94	5168.49	3422.35	994.664	1320.14	2812.95	1195.35	1346.89	1
ENSMUSG00000030353	Tead4	293.097	0.200174	0.33889	22.3284	1.41729e-05	0.000220464	198.878	183.83	155.355	515.009	520.024	294.835	180.566	296.284	3
ENSMUSG00000015027	Galns	174.783	2.61593	0.52442	22.3072	1.43236e-05	0.000222634	59.7933	40.0173	87.3165	149.056	201.742	92.6369	409.524	358.181	2
ENSMUSG00000042726	Trafd1	3079.57	1.62071	0.486107	22.3004	1.43725e-05	0.000223221	1162.07	1004.18	1306.35	2047.61	6264.77	6585.24	3802	2464.35	3
ENSMUSG00000006390	Elovl1	438.905	1.09171	0.251278	22.2945	1.44145e-05	0.0002237	293.767	263.864	256.28	636.356	423.07	419.538	652.204	566.158	2
ENSMUSG00000025888	Casp1	339.823	2.40174	0.644578	22.2865	1.44726e-05	0.000224363	59.7933	112.549	74.8427	175.81	949.949	613.719	469.471	262.446	3
ENSMUSG00000020395	Itk	84.6169	2.67302	0.706207	22.2855	1.44798e-05	0.000224363	10.3988	26.2614	13.6078	68.7952	262.46	91.7461	128.563	75.1025	3
ENSMUSG00000059146	Ntrk3	607.418	-3.54887	0.702668	22.2832	1.44967e-05	0.000224452	928.095	2174.69	514.827	530.296	165.507	252.079	236.903	56.9459	1
ENSMUSG00000020777	Acox1	8900.47	-1.24752	0.260434	22.2594	1.46701e-05	0.00022696	11299.6	11349.9	12781.1	7012.33	7269.56	12568.3	5006.01	3916.89	1
ENSMUSG00000020376	Rnf130	1190.27	0.658205	0.180595	22.2286	1.48976e-05	0.000230302	1099.68	1079.22	1034.19	981.287	959.742	943.293	1702.38	1722.41	2
ENSMUSG00000031792	Usb1	421.133	1.59593	0.458465	22.2183	1.49748e-05	0.000231316	161.182	171.324	173.499	341.11	883.354	670.727	579.978	387.892	3
ENSMUSG00000053113	Socs3	3424.31	-1.86487	0.510235	22.1867	1.5213e-05	0.000234813	3631.79	2782.45	2675.06	2610.4	8361.51	5649.07	1048.73	635.483	3
ENSMUSG00000022898	Dscr3	479.838	0.970881	0.22657	22.18	1.52643e-05	0.000235423	378.257	393.92	353.802	433.792	384.876	371.438	833.492	689.128	2
ENSMUSG00000041741	Pde3a	306.768	-0.798464	0.294323	22.1783	1.5277e-05	0.000235438	460.148	436.439	450.19	220.718	144.941	250.298	263.626	227.784	1
ENSMUSG00000037997	Parp11	745.713	2.74602	0.693864	22.1759	1.52955e-05	0.000235541	127.386	191.333	132.676	278.047	1630.58	1956.95	1094.95	553.778	3
ENSMUSG00000056313	1810011O10Rik	464.068	-0.819173	0.286961	22.1582	1.54313e-05	0.000237085	724.018	587.754	724.614	248.427	347.662	341.153	391.467	347.452	1
ENSMUSG00000052142	Rasal3	78.4394	2.82005	0.620317	22.1587	1.54278e-05	0.000237085	14.2984	23.7603	15.8757	71.6617	165.507	54.3351	174.788	107.289	3
ENSMUSG00000063663	Brwd3	560.329	0.776665	0.233176	22.1602	1.54162e-05	0.000237085	376.958	347.65	395.759	665.02	717.848	725.953	695.54	557.905	3
ENSMUSG00000053318	Slamf8	150.239	4.86674	1.07799	22.1256	1.5685e-05	0.000240796	5.19941	17.5076	4.53592	15.2878	492.602	338.481	203.678	124.621	3
ENSMUSG00000045658	Pid1	615.588	1.43842	0.309084	22.113	1.57842e-05	0.000242133	393.856	317.637	511.425	497.81	605.225	509.503	1177.29	911.959	2
ENSMUSG00000074896	Ifit3	9596.87	5.84741	1.31912	22.1049	1.58479e-05	0.000242925	141.684	128.806	113.398	1691.22	28452.4	33596	8982.07	3669.3	3
ENSMUSG00000033207	Mamdc2	70.1145	-1.61944	0.524305	22.1032	1.58615e-05	0.000242946	107.888	100.043	176.901	15.2878	33.2972	58.7888	21.6679	47.0422	1
ENSMUSG00000026425	Srgap2	1386.42	1.60129	0.344428	22.0969	1.59115e-05	0.000243157	899.499	667.789	790.385	982.243	1557.13	1586.41	2728.71	1879.21	2
ENSMUSG00000027347	Rasgrp1	91.14	2.70004	0.594898	22.0971	1.59102e-05	0.000243157	25.9971	32.5141	19.2777	59.2403	147.879	103.326	213.79	127.097	2
ENSMUSG00000015461	Atf6b	491.172	0.995377	0.238251	22.0954	1.5924e-05	0.000243157	318.464	306.383	312.979	643.044	567.031	476.546	716.486	588.441	2
ENSMUSG00000020152	Actr2	4285	1.29989	0.315332	22.0963	1.59169e-05	0.000243157	2435.93	2357.27	2314.46	3553.46	6687.84	5388.97	6176.8	5365.29	3
ENSMUSG00000010358	Ifi35	694.42	2.1101	0.567563	22.0623	1.61894e-05	0.000247022	213.176	176.326	231.332	370.73	1505.23	1494.66	943.277	620.628	3
ENSMUSG00000032589	Bsn	35.9785	2.7482	0.589167	22.0605	1.62044e-05	0.000247061	10.3988	10.0043	18.1437	28.6647	33.2972	37.4111	71.5041	78.4037	2
ENSMUSG00000090213	Tmem189	485.875	1.04936	0.229816	22.0494	1.62943e-05	0.000248243	327.563	340.147	293.701	522.653	566.052	427.555	748.265	661.067	2
ENSMUSG00000027678	Ncoa3	2162.76	0.895307	0.190781	22.0383	1.63846e-05	0.000249429	1604.02	1594.44	1665.82	2304.64	2076.18	1925.78	3210.46	2920.75	2
ENSMUSG00000025165	Sectm1a	31.5307	6.56964	1.64173	22.0112	1.66082e-05	0.000252639	1.29985	0	0	7.64391	70.5117	105.107	46.2249	21.4579	3
ENSMUSG00000029563	Foxp2	68.0587	-1.04876	0.475321	21.9545	1.70859e-05	0.000259661	131.285	98.7927	119.068	21.9762	27.4212	42.7555	46.2249	56.9459	1
ENSMUSG00000022967	Ifnar1	1424.09	1.30983	0.309918	21.9534	1.70958e-05	0.000259661	820.208	841.614	721.212	1266.02	2125.14	1582.84	2267.91	1767.8	3
ENSMUSG00000020654	Adcy3	370.88	-1.47147	0.424523	21.9215	1.73699e-05	0.000263624	592.733	706.556	547.713	238.872	129.271	321.557	257.848	172.488	1
ENSMUSG00000115801		192.656	-1.65676	0.344204	21.9123	1.74504e-05	0.000264443	300.266	202.588	328.854	151.923	170.403	230.701	71.5041	85.0062	1
ENSMUSG00000025330	Padi4	206.345	4.25327	0.814399	21.913	1.7444e-05	0.000264443	23.3974	7.50325	45.3592	636.356	121.437	123.813	320.685	372.211	2
ENSMUSG00000073411	H2-D1	9925.19	1.75278	0.383155	21.8942	1.7609e-05	0.000266644	4780.86	4428.17	5555.37	7266.49	14406.9	11389.9	19453.5	12120.4	2
ENSMUSG00000073411	H2-D1	9925.19	1.75278	0.383155	21.8942	1.7609e-05	0.000266644	4780.86	4428.17	5555.37	7266.49	14406.9	11389.9	19453.5	12120.4	2
ENSMUSG00000074622	Mafb	1338.89	1.16119	0.252279	21.8855	1.76858e-05	0.000267606	815.008	914.145	1245.11	941.157	1448.43	1337	1983.34	2026.94	2
ENSMUSG00000056973	Ces1d	3995.94	-2.37121	0.500782	21.8802	1.77326e-05	0.000268109	6118.41	8453.66	5514.55	1982.64	2833.2	4574.84	1762.32	727.917	1
ENSMUSG00000040363	Bcor	1123.54	-0.639095	0.221166	21.8642	1.78754e-05	0.000270065	1132.17	1129.24	948.008	1469.54	1647.23	1166.87	631.981	863.267	3
ENSMUSG00000073409	H2-Q6	590.728	3.32757	0.681978	21.8448	1.80493e-05	0.000272485	115.687	170.074	129.274	183.454	1015.56	665.382	1745.71	700.682	2
ENSMUSG00000073409	H2-Q6	590.728	3.32757	0.681978	21.8448	1.80493e-05	0.000272485	115.687	170.074	129.274	183.454	1015.56	665.382	1745.71	700.682	2
ENSMUSG00000030711	Sult1a1	916.094	-1.49882	0.307152	21.8351	1.81375e-05	0.000273611	1191.97	919.148	1502.52	1229.71	852.995	811.464	429.747	391.193	1
ENSMUSG00000030921	Trim30a	3239.72	3.9109	0.975224	21.8159	1.83116e-05	0.000276029	285.968	227.598	201.849	1386.41	8783.6	8323.96	4244.02	2464.35	3
ENSMUSG00000023004	Tuba1b	868.936	1.17134	0.269248	21.8066	1.83979e-05	0.00027712	467.947	510.221	614.618	1096.9	1020.46	857.782	1098.56	1285	2
ENSMUSG00000019132	BC005537	6120.03	1.12663	0.261869	21.8022	1.84384e-05	0.00027752	3893.06	3722.86	3968.93	5440.55	8155.85	7273.78	8926.46	7578.75	3
ENSMUSG00000069516	Lyz2	7046.52	2.21771	0.630937	21.7919	1.85329e-05	0.000278733	1836.69	926.651	1958.39	3631.81	21654.9	12012.5	6635.44	7715.75	3
ENSMUSG00000036395	Glb1l2	672.526	-1.63696	0.34465	21.7822	1.86233e-05	0.000279881	904.698	1026.69	1039.86	598.136	565.073	592.342	441.303	212.103	1
ENSMUSG00000018965	Ywhah	1014.4	0.839162	0.202297	21.7723	1.87154e-05	0.000281055	737.017	689.048	713.274	1055.82	1213.39	1160.63	1209.07	1336.99	3
ENSMUSG00000061175	Fnip2	1664.69	2.04717	0.430215	21.7628	1.88047e-05	0.000282183	746.116	637.776	906.051	1006.13	2459.09	1491.1	3497.92	2573.29	2
ENSMUSG00000038418	Egr1	2247.46	-1.977	0.412245	21.7492	1.89327e-05	0.000283891	2890.87	2113.41	3663.89	1317.62	3097.62	3652.92	685.428	557.905	3
ENSMUSG00000060548	Tnfrsf19	376.496	-0.75758	0.399184	21.7446	1.89769e-05	0.000284128	717.519	541.484	510.291	203.519	126.333	251.188	279.516	382.115	1
ENSMUSG00000059811	Atl2	4318.24	-0.959864	0.290722	21.7458	1.89658e-05	0.000284128	6536.96	6335.24	6071.33	2254	2964.43	4261.3	2680.32	3442.34	1
ENSMUSG00000079022	Col22a1	439.643	-0.74017	0.30429	21.7418	1.90028e-05	0.000284302	553.738	635.275	732.552	168.166	342.765	361.64	260.015	462.995	1
ENSMUSG00000086872	Gm14225	11.1629	7.20599	1.66747	21.7347	1.90705e-05	0.000284927	0	0	0	4.77745	1.95866	1.78148	52.7253	28.0603	2
ENSMUSG00000054408	Spcs3	1422.97	0.984865	0.233704	21.7345	1.90731e-05	0.000284927	899.499	861.623	1047.8	1556.49	1854.85	1475.96	1786.88	1900.67	2
ENSMUSG00000061232	H2-K1	10688.3	2.22271	0.476806	21.724	1.9173e-05	0.000286205	4008.75	4255.59	4507.57	6142.84	16989.4	11634.8	24866.1	13101.7	2
ENSMUSG00000021886	Gpr65	74.0467	3.61468	0.777526	21.694	1.94631e-05	0.000290318	19.4978	2.50108	15.8757	62.1068	123.395	76.6036	171.899	120.494	2
ENSMUSG00000035929	H2-Q4	1581.05	2.68429	0.626412	21.6679	1.97188e-05	0.000293913	412.054	436.439	383.286	637.311	3260.19	2724.77	3169.29	1625.02	3
ENSMUSG00000042292	Mkl1	591.657	1.26874	0.272108	21.664	1.97572e-05	0.000294266	384.757	368.91	373.08	725.216	510.23	498.814	881.884	990.363	2
ENSMUSG00000039158	Akna	769.38	2.17725	0.49666	21.66	1.97968e-05	0.000294557	235.273	167.572	269.887	1887.09	819.698	433.79	1380.25	961.478	2
ENSMUSG00000027514	Zbp1	2271.37	5.54827	1.2075	21.6575	1.9821e-05	0.000294557	83.1906	81.2852	30.6175	651.644	6087.51	5250.91	4067.79	1918	3
ENSMUSG00000059436	Max	1159.71	0.474997	0.263647	21.6577	1.98198e-05	0.000294557	734.417	781.588	822.136	1296.6	1810.78	1748.52	1152.73	930.941	3
ENSMUSG00000028923	Necap2	608.992	1.21172	0.267181	21.6113	2.02842e-05	0.000301217	412.054	370.16	359.472	589.537	730.579	578.09	1042.23	789.815	2
ENSMUSG00000003062	Stard3nl	306.421	1.44106	0.321792	21.6085	2.03132e-05	0.000301424	162.482	166.322	205.251	249.383	380.959	403.505	488.973	394.495	3
ENSMUSG00000032712	2810474O19Rik	3152.65	1.31486	0.386819	21.5972	2.04279e-05	0.0003029	1714.51	1486.89	1369.85	2995.46	5099.36	4968.54	4850.72	2735.88	3
ENSMUSG00000031375	Bgn	2136.33	0.678625	0.264926	21.5884	2.0518e-05	0.000304011	2032.97	2104.66	2145.49	1210.6	1359.31	1738.72	2444.14	4054.71	2
ENSMUSG00000040447	Spns2	1382.58	-1.81033	0.366072	21.5521	2.08939e-05	0.000309121	1784.7	1947.09	2049.1	1981.68	1183.03	936.167	524.364	654.465	1
ENSMUSG00000030659	Nucb2	220.445	1.27757	0.294996	21.5524	2.08913e-05	0.000309121	118.287	135.058	119.068	287.602	261.481	195.072	341.631	305.362	2
ENSMUSG00000097462	9530026P05Rik	156.991	-1.59875	0.340113	21.5501	2.09153e-05	0.000309209	267.77	188.832	209.786	209.252	91.0776	138.065	91.7275	59.4218	1
ENSMUSG00000040710	St8sia4	480.218	1.62099	0.377732	21.5244	2.1185e-05	0.000312965	243.073	158.819	267.619	729.994	627.75	410.631	694.096	709.76	2
ENSMUSG00000073490	Ifi207	4019.67	1.85143	0.553022	21.5	2.14459e-05	0.000316584	1347.95	1116.73	1385.72	2430.76	9501.45	7913.33	5400.37	3061.05	3
ENSMUSG00000055491	Pprc1	1283.99	-0.202479	0.204105	21.4921	2.15303e-05	0.000317595	1201.06	1051.7	1008.11	1677.84	1843.1	1518.71	944.721	1026.68	3
ENSMUSG00000024675	Ms4a4c	1742.37	8.74332	1.58028	21.483	2.16284e-05	0.000318808	7.79912	20.0087	2.26796	113.703	4502.95	2904.7	4109.68	2277.84	3
ENSMUSG00000068220	Lgals1	2893.76	0.626852	0.201528	21.4796	2.16652e-05	0.000319115	2645.2	2624.89	2961.96	1846.96	2464.97	2449.53	3759.38	4397.21	2
ENSMUSG00000031266	Gla	360.245	2.79224	0.608429	21.4551	2.1932e-05	0.000322806	129.985	60.026	121.336	168.166	605.225	470.31	782.212	544.7	3
ENSMUSG00000001507	Itga3	359.854	-0.625122	0.242439	21.4527	2.19584e-05	0.000322956	374.358	328.892	301.639	480.611	527.858	404.396	233.291	227.784	3
ENSMUSG00000029175	Slc35f6	655.349	1.20397	0.260157	21.4488	2.20011e-05	0.000323346	425.052	430.186	488.746	556.095	696.303	635.988	1122.4	888.026	2
ENSMUSG00000026185	Igfbp5	6680.22	-0.245997	0.18573	21.43	2.22089e-05	0.00032616	7614.54	9883.02	7013.67	4731.58	5231.57	4623.83	6694.66	7648.9	1
ENSMUSG00000078185	Chml	227.036	0.0415077	0.269192	21.4233	2.22842e-05	0.000327027	254.771	261.363	327.72	148.101	129.271	146.081	288.183	260.796	1
ENSMUSG00000031506	Ptpn7	88.8707	3.20707	0.653179	21.4216	2.23025e-05	0.000327055	10.3988	22.5097	27.2155	76.4391	156.693	54.3351	206.567	156.807	2
ENSMUSG00000100862	Gm10925	783.039	-1.14315	0.335804	21.4	2.25448e-05	0.000330364	1055.48	1132.99	1408.4	300.979	500.437	961.108	396.523	508.386	1
ENSMUSG00000112843	AC152979.5	77.6036	3.35315	0.82804	21.3983	2.25639e-05	0.000330403	10.3988	8.75379	15.8757	25.7982	189.01	192.4	101.839	76.7531	3
ENSMUSG00000001166	Oas1c	48.0574	3.95667	1.03609	21.3904	2.26537e-05	0.000331475	6.49927	0	7.93787	42.997	103.809	103.326	91.0052	28.8856	3
ENSMUSG00000065954	Tacc1	2993.98	-0.256965	0.19591	21.3779	2.2795e-05	0.000333185	2643.9	2699.92	2495.89	4262.44	3474.66	3949.54	2399.36	2026.12	3
ENSMUSG00000062480	Acat3	104.416	0.766283	0.524893	21.3771	2.2804e-05	0.000333185	36.3959	42.5184	45.3592	255.116	130.251	161.224	125.674	38.7892	3
ENSMUSG00000060538	Tmem219	235.525	1.70235	0.400721	21.375	2.28289e-05	0.000333306	90.9897	128.806	122.47	178.676	329.054	376.783	372.688	284.729	3
ENSMUSG00000030107	Usp18	1858.68	4.2381	1.09798	21.3586	2.30169e-05	0.000335804	76.6914	92.54	83.9146	564.694	5255.08	6248.54	1704.54	843.459	3
ENSMUSG00000053175	Bcl3	536.893	-1.1599	0.433353	21.349	2.31272e-05	0.000337167	517.342	450.195	358.338	531.252	1189.88	837.295	244.125	166.711	3
ENSMUSG00000105071	Gm43336	72.4088	2.56333	0.542524	21.3389	2.32445e-05	0.000338631	18.1979	22.5097	26.0816	110.837	63.6564	46.3184	165.398	126.271	2
ENSMUSG00000064288	Hist1h4k	107.369	2.46422	0.582007	21.3343	2.32973e-05	0.000339152	19.4978	42.5184	18.1437	231.228	112.623	61.461	158.898	214.579	2
ENSMUSG00000097194	9330175E14Rik	152.936	3.12349	0.808831	21.325	2.34059e-05	0.000340485	27.2969	30.013	11.3398	66.8842	353.538	351.842	251.348	131.223	3
ENSMUSG00000022026	Olfm4	30.6179	0.505949	1.13751	21.3072	2.36153e-05	0.000343281	0	5.00216	14.7418	78.3501	75.4083	59.6795	4.33358	7.42772	3
ENSMUSG00000030123	Plxnd1	1580.16	1.03741	0.268882	21.2979	2.37263e-05	0.000344644	1388.24	1259.29	1146.45	929.691	1423.94	1214.97	2655.04	2623.64	2
ENSMUSG00000024613	Tcof1	1223.01	0.863633	0.222741	21.2956	2.37533e-05	0.000344785	805.909	872.878	791.519	1172.39	1704.03	1412.71	1464.03	1560.65	3
ENSMUSG00000048897	Zfp710	1149.02	0.872888	0.196443	21.2923	2.3792e-05	0.000345096	809.809	869.126	798.323	1121.74	1365.18	1140.15	1536.26	1551.57	2
ENSMUSG00000019577	Pdk4	51395.5	-1.52879	0.321873	21.2854	2.3875e-05	0.00034605	70849.8	56234.3	70176.4	55857.9	38838.2	78426.9	16853.3	23927.2	1
ENSMUSG00000060090	Rp2	384.409	1.6427	0.357693	21.2705	2.40524e-05	0.000348368	222.275	196.335	231.332	264.67	449.512	422.21	741.765	547.176	2
ENSMUSG00000024621	Csf1r	1604.63	2.08182	0.43474	21.2512	2.42868e-05	0.000351507	786.411	460.199	885.639	1268.89	2212.3	1136.58	3005.34	3081.68	2
ENSMUSG00000055254	Ntrk2	1647.09	-1.61189	0.333873	21.2494	2.43081e-05	0.000351561	2234.45	2135.92	2150.03	1808.74	1373.02	1995.26	1044.39	434.934	1
ENSMUSG00000018326	Ywhab	4065.9	-0.670991	0.173046	21.2459	2.43507e-05	0.000351922	5322.9	4614.5	5740.21	3419.7	3316.01	3858.68	3370.81	2884.43	1
ENSMUSG00000070372	Capza1	797.994	1.0651	0.251003	21.2144	2.47373e-05	0.000357251	506.943	527.728	467.2	818.854	1106.64	739.314	1170.79	1046.48	3
ENSMUSG00000039671	Zmynd8	1075.33	0.969096	0.225804	21.2093	2.4801e-05	0.000357912	856.603	780.337	856.156	1142.76	801.091	805.228	1904.61	1455.83	2
ENSMUSG00000019842	Traf3ip2	271.422	0.296272	0.298683	21.1982	2.49387e-05	0.00035964	149.483	231.35	161.025	362.13	453.429	358.968	235.458	219.53	3
ENSMUSG00000035186	Ubd	113.762	4.16564	0.804279	21.1884	2.50608e-05	0.00036114	7.79912	17.5076	38.5554	59.2403	129.271	131.829	426.858	99.0363	2
ENSMUSG00000110018	5430437J10Rik	11.1145	7.34278	1.64973	21.168	2.53183e-05	0.000364587	0	0	0	4.77745	6.8553	7.12591	40.4468	29.7109	2
ENSMUSG00000085499	Gm15713	169.376	-1.0982	0.307896	21.1637	2.53725e-05	0.000365104	266.47	211.341	288.031	104.148	118.499	146.972	115.562	103.988	1
ENSMUSG00000020265	Sumo3	674.271	0.999378	0.226271	21.1559	2.5472e-05	0.000366272	493.944	500.216	551.115	644	579.763	561.166	1140.45	923.514	2
ENSMUSG00000024539	Ptpn2	574.403	0.106839	0.337617	21.1439	2.56247e-05	0.000368203	371.758	398.923	358.338	685.086	1141.9	811.464	480.305	347.452	3
ENSMUSG00000074793	Hspa12b	516.899	-0.482389	0.224604	21.1281	2.58283e-05	0.000370862	730.518	596.508	741.624	360.219	361.372	393.707	470.916	480.326	1
ENSMUSG00000057098	Ebf1	1553.45	-0.688785	0.197521	21.1011	2.61789e-05	0.000375626	2330.64	1743.25	2066.11	1403.61	988.143	1451.91	1369.41	1074.54	1
ENSMUSG00000028796	Phc2	1119.7	0.598892	0.33419	21.0896	2.63294e-05	0.000377514	642.128	616.517	747.293	1102.63	1947.88	2046.03	1053.78	801.369	3
ENSMUSG00000004098	Col5a3	2541.86	0.858839	0.245591	21.0833	2.64126e-05	0.000378436	2277.34	1785.77	2639.91	2064.81	1927.32	1738.72	4405.81	3495.16	2
ENSMUSG00000089844	A530032D15Rik	169.687	3.23356	0.903951	21.0736	2.65419e-05	0.000380016	25.9971	11.2549	19.2777	52.5519	394.669	542.46	230.402	80.8797	3
ENSMUSG00000089844	A530032D15Rik	169.687	3.23356	0.903951	21.0736	2.65419e-05	0.000380016	25.9971	11.2549	19.2777	52.5519	394.669	542.46	230.402	80.8797	3
ENSMUSG00000039497	Dse	1110.59	1.74647	0.404499	21.0596	2.67277e-05	0.000382402	519.941	528.979	566.99	690.819	1548.32	1778.81	1856.94	1393.94	3
ENSMUSG00000017760	Ctsa	2037.41	1.17876	0.261836	21.0459	2.69113e-05	0.000384477	1354.45	1368.09	1618.19	1605.22	2226.99	1585.52	3353.47	3187.32	2
ENSMUSG00000020261	Slc36a1	554.123	1.38233	0.297807	21.0473	2.68932e-05	0.000384477	300.266	337.646	424.109	546.54	556.259	451.605	1006.11	810.447	2
ENSMUSG00000087475	4933406I18Rik	40.1272	-2.18569	0.664751	21.0444	2.69318e-05	0.000384495	87.0902	80.0346	60.101	26.7537	10.7726	8.90739	38.28	9.07833	1
ENSMUSG00000099104	Gm17087	17.1437	-2.91598	0.870376	21.002	2.75083e-05	0.000392182	50.6943	37.5162	23.8136	3.82196	5.87597	3.56296	3.61132	8.25303	1
ENSMUSG00000048003	Catsper4	86.159	-1.15667	0.47036	21.002	2.75095e-05	0.000392182	59.7933	51.2722	113.398	153.834	116.54	137.174	32.5019	24.7591	3
ENSMUSG00000031442	Mcf2l	1078.83	-0.930316	0.214658	20.9974	2.75723e-05	0.000392798	1294.65	1434.37	1569.43	939.246	822.636	1172.21	676.761	721.314	1
ENSMUSG00000097834	Gm26911	99.7458	-1.87257	0.539451	20.9831	2.77697e-05	0.000395328	248.272	163.821	133.81	64.9733	27.4212	64.1332	41.8913	53.6447	1
ENSMUSG00000020120	Plek	2639.07	1.9727	0.556524	20.9644	2.80316e-05	0.000398772	816.308	599.009	1050.07	1554.58	6934.63	4337.9	3268.24	2551.84	3
ENSMUSG00000026255	Efhd1	95.2159	-0.678224	0.434374	20.9563	2.81442e-05	0.000400088	181.979	127.555	141.748	43.9525	33.2972	55.2258	77.2822	100.687	1
ENSMUSG00000097585	E230029C05Rik	54.7453	2.1624	0.474414	20.9465	2.82835e-05	0.000401782	22.0975	23.7603	22.6796	50.6409	60.7184	45.4277	111.951	100.687	2
ENSMUSG00000024054	Smchd1	1839.18	1.1254	0.303815	20.9389	2.8391e-05	0.000403024	1065.88	1100.48	1023.98	1657.77	2851.8	2433.5	2501.92	2078.11	3
ENSMUSG00000021591	Glrx	727.638	1.07957	0.372798	20.923	2.86175e-05	0.00040595	335.362	382.666	386.687	672.664	1540.48	975.36	825.548	702.333	3
ENSMUSG00000029204	Rhoh	201.636	2.60927	0.758419	20.9196	2.86662e-05	0.000406212	44.195	25.0108	36.2874	82.1721	497.499	549.586	234.736	143.603	3
ENSMUSG00000038884	A230050P20Rik	197.202	1.1229	0.393232	20.9189	2.86766e-05	0.000406212	83.1906	78.7841	147.418	232.184	328.075	323.338	225.346	159.283	3
ENSMUSG00000071714	Csf2rb2	608.414	0.885224	0.453466	20.9097	2.88088e-05	0.000407794	271.669	270.117	290.299	509.276	1421.99	1145.49	553.254	405.224	3
ENSMUSG00000098072	Gm26995	11.8836	-3.29803	1.12151	20.8846	2.91728e-05	0.000412654	44.195	22.5097	17.0097	2.86647	0	1.78148	5.05585	1.65061	1
ENSMUSG00000005481	Ddx39	436.675	1.03859	0.244254	20.8697	2.93903e-05	0.000415438	256.071	280.121	324.319	476.789	534.713	463.184	547.476	610.724	2
ENSMUSG00000054855	Rnd1	344.015	-3	0.630975	20.8592	2.95453e-05	0.000417333	431.551	461.45	291.433	137.59	809.905	521.973	52.003	46.2169	3
ENSMUSG00000021486	Prelid1	766.752	1.37863	0.311807	20.8434	2.97794e-05	0.000420342	341.861	457.698	493.282	928.735	954.845	684.088	1222.07	1051.44	2
ENSMUSG00000004043	Stat5a	1259.86	-0.018532	0.232857	20.8198	3.01324e-05	0.000425025	1009.99	1039.2	887.907	1761.92	1794.13	1548.1	1185.96	851.712	3
ENSMUSG00000026950	Neb	338769	-0.84515	0.228209	20.7961	3.04919e-05	0.00042944	445633	535150	384692	249384	290010	269825	204666	330790	1
ENSMUSG00000103220	Gm37728	213.908	-1.67266	0.412156	20.7949	3.051e-05	0.00042944	378.257	333.894	315.247	163.389	92.0569	229.811	100.395	98.211	1
ENSMUSG00000019590	Cyb561	303.053	0.358657	0.292286	20.7963	3.04893e-05	0.00042944	224.875	178.827	184.839	563.739	408.38	320.666	271.571	271.525	3
ENSMUSG00000004698	Hdac9	207.513	1.19134	0.374351	20.7537	3.11457e-05	0.000437771	180.68	162.57	176.901	80.2611	137.106	169.24	296.128	457.218	2
ENSMUSG00000043421	Hilpda	128.411	0.72968	0.342154	20.7547	3.11293e-05	0.000437771	68.8922	63.7776	96.3884	158.611	147.879	281.474	99.6724	110.591	3
ENSMUSG00000027293	Ehd4	2056.44	1.48896	0.362499	20.7505	3.11954e-05	0.000438162	1224.46	835.361	1050.07	1670.19	3280.75	2563.55	2744.6	3082.51	3
ENSMUSG00000022048	Dpysl2	1925.58	0.850882	0.255683	20.7299	3.15174e-05	0.000442373	1789.9	1610.7	1779.22	1094.99	1525.79	1670.14	3100.68	2833.26	2
ENSMUSG00000049130	C5ar1	845.129	2.65561	0.570781	20.7046	3.19196e-05	0.000447703	241.773	102.544	345.864	1665.42	1108.6	530.881	1518.92	1247.03	2
ENSMUSG00000037661	Gpr160	98.9739	1.37421	0.364106	20.7016	3.19675e-05	0.000448061	79.2911	57.5249	80.5126	78.3501	62.677	60.5703	203.678	169.187	2
ENSMUSG00000001627	Ifrd1	2037.27	-0.945069	0.209744	20.6993	3.20033e-05	0.000448248	2485.32	2033.38	2704.54	2308.46	2161.38	2184.98	1201.12	1218.97	1
ENSMUSG00000054321	Taf4b	293.352	-0.894338	0.300325	20.646	3.28685e-05	0.000460044	326.263	256.361	264.218	379.329	384.876	433.79	133.619	168.362	3
ENSMUSG00000033871	Ppargc1b	659.592	-0.695945	0.378623	20.6318	3.31028e-05	0.000462999	960.592	1150.5	901.515	269.448	277.15	570.073	478.139	669.32	1
ENSMUSG00000005973	Rcn1	557.101	0.930519	0.229667	20.6224	3.32577e-05	0.00046484	363.959	383.916	358.338	651.644	675.737	555.821	642.093	825.303	2
ENSMUSG00000092746	Rn7s6	945.742	-1.30872	0.364935	20.6003	3.36274e-05	0.000469679	1086.68	1536.91	1873.34	729.994	433.843	785.632	714.319	405.224	1
ENSMUSG00000023044	Csad	727.34	-1.47801	0.315174	20.5896	3.3808e-05	0.00047187	943.694	1036.7	980.893	828.409	523.941	780.288	467.305	257.494	1
ENSMUSG00000038065	Mturn	690.647	-1.21818	0.283473	20.5856	3.38755e-05	0.000472483	1039.88	927.901	941.204	684.13	409.359	722.39	423.969	376.338	1
ENSMUSG00000051853	Arf3	1657.43	0.810322	0.250027	20.5812	3.39499e-05	0.000473191	1028.18	1075.47	1123.78	2109.72	2096.74	2018.42	2285.24	1521.86	2
ENSMUSG00000025283	Sat1	2059.13	0.842525	0.346042	20.562	3.42784e-05	0.000477436	1293.35	1114.23	1034.19	2045.7	3512.85	3402.62	2316.3	1753.77	3
ENSMUSG00000031897	Psmb10	825.539	2.68232	0.631202	20.539	3.46753e-05	0.000482627	202.777	235.102	244.94	312.445	1615.89	1532.96	1625.82	834.381	3
ENSMUSG00000003420	Fcgrt	1664.36	-0.505223	0.218878	20.5131	3.51271e-05	0.000488574	2177.25	2223.46	2207.86	1241.18	1025.36	1459.03	1546.37	1434.38	1
ENSMUSG00000040809	Chil3	1951.4	6.37441	1.39391	20.5085	3.52069e-05	0.000489345	25.9971	2.50108	47.6272	1767.65	7936.48	2319.49	1921.94	1589.53	3
ENSMUSG00000023019	Gpd1	11462.4	-1.78192	0.460496	20.5053	3.5264e-05	0.000489797	13614.7	35612.9	11092.6	5338.32	7343.01	7519.62	6158.02	5020.32	1
ENSMUSG00000039994	Timeless	469.954	1.63029	0.575174	20.4852	3.56202e-05	0.0004944	175.48	170.074	106.594	350.664	1024.38	1010.99	598.757	322.693	3
ENSMUSG00000025955	Akr1cl	20.7269	-4.72256	1.38364	20.4754	3.57959e-05	0.000496494	63.6928	10.0043	83.9146	1.91098	1.95866	0	4.33358	0	1
ENSMUSG00000040370	Etfrf1	799.911	-1.17092	0.27319	20.4722	3.58516e-05	0.000496578	1025.58	1320.57	992.233	570.427	673.778	856.891	445.637	514.164	1
ENSMUSG00000075702	Selenom	150.865	0.855139	0.300953	20.4735	3.58289e-05	0.000496578	116.987	142.562	173.499	92.6824	89.1189	124.704	218.124	249.241	2
ENSMUSG00000055632	Hmcn2	2899.71	-0.615492	0.247187	20.4685	3.59197e-05	0.000497175	3960.65	3784.14	4241.09	1601.4	1974.33	2863.73	2212.29	2560.09	1
ENSMUSG00000073145	Gm12000	25.7392	2.98822	0.869108	20.4539	3.61814e-05	0.000500451	1.29985	3.75162	9.07185	43.9525	40.1525	51.6629	29.6128	26.4097	3
ENSMUSG00000041801	Phlda3	2794.29	-0.801019	0.189916	20.4332	3.6558e-05	0.00050531	3374.42	3402.72	4070.99	2081.06	2563.88	3021.39	1864.89	1974.95	1
ENSMUSG00000019278	Dpep1	584.715	-0.897789	0.286674	20.4029	3.71161e-05	0.000512669	918.996	672.791	955.946	550.362	314.364	387.472	447.804	429.983	1
ENSMUSG00000056602	Fry	4791.04	-0.703909	0.18211	20.3695	3.77422e-05	0.000520957	5997.52	6087.63	6382.04	3764.63	4140.6	4638.97	3333.97	3982.91	1
ENSMUSG00000048537	Phldb1	2212.48	-0.502237	0.219223	20.3669	3.77907e-05	0.000521267	3115.75	2459.81	3212.57	1610.95	1663.88	1601.55	1963.84	2071.51	1
ENSMUSG00000049265	Kcnk3	529.219	-2.5286	0.730725	20.3555	3.80072e-05	0.000523891	1006.09	1584.44	619.154	247.472	49.9458	277.02	342.353	107.289	1
ENSMUSG00000032369	Plscr1	182.583	-0.163654	0.394442	20.3506	3.80989e-05	0.000524793	102.688	162.57	99.7903	285.691	300.654	284.146	134.341	90.7833	3
ENSMUSG00000020638	Cmpk2	7268.11	4.57356	1.37224	20.3277	3.85381e-05	0.000530477	88.39	63.7776	94.1204	965.999	20000.8	33905.1	2086.62	940.02	3
ENSMUSG00000048616	Nog	216.969	-0.513862	0.410742	20.3263	3.85658e-05	0.000530492	120.886	168.823	171.231	189.187	514.148	374.111	97.5056	99.8616	3
ENSMUSG00000023947	Nfkbie	355.769	2.23107	0.64262	20.3079	3.89225e-05	0.00053503	92.2896	60.026	133.81	193.964	900.982	728.625	460.804	275.651	3
ENSMUSG00000117050		55.3067	-0.0506036	0.496164	20.3042	3.89932e-05	0.000535633	29.8966	27.5119	38.5554	96.5044	103.809	85.511	31.7796	28.8856	3
ENSMUSG00000053062	Jam2	978.322	-0.639941	0.242931	20.2818	3.94328e-05	0.0005413	1488.33	1260.55	1257.58	730.949	607.184	802.556	798.824	880.598	1
ENSMUSG00000022969	Il10rb	441.781	1.72152	0.380297	20.2712	3.96434e-05	0.000543817	253.471	220.095	244.94	293.335	553.321	368.766	919.442	680.875	2
ENSMUSG00000117294		183.031	-1.08915	0.454953	20.2674	3.97188e-05	0.000544478	105.288	197.585	146.284	387.929	248.749	228.92	62.837	86.6568	3
ENSMUSG00000079014	Serpina3i	26.3076	3.23638	1.07217	20.2536	3.99935e-05	0.000547867	2.59971	2.50108	2.26796	45.8635	57.7804	39.1925	52.003	8.25303	3
ENSMUSG00000056501	Cebpb	1597.77	-0.620187	0.235424	20.2356	4.03557e-05	0.000552092	1207.56	1661.97	1749.73	1580.38	2388.58	2356.01	920.164	917.736	3
ENSMUSG00000115855		19.8555	2.83208	1.15383	20.2355	4.03572e-05	0.000552092	0	2.50108	4.53592	16.2433	64.6357	49.8814	8.66717	12.3795	3
ENSMUSG00000029560	Snx8	448.447	0.923666	0.235701	20.232	4.0428e-05	0.000552682	366.559	338.897	393.491	403.216	357.455	332.246	722.264	673.447	2
ENSMUSG00000044770	Scml4	68.1386	1.15389	0.464175	20.2135	4.08024e-05	0.000557419	28.5968	27.5119	31.7515	112.748	127.313	77.4943	67.8928	71.8013	3
ENSMUSG00000000787	Ddx3x	9883.07	-0.771452	0.177962	20.2053	4.097e-05	0.000559326	11688.3	10805.9	10998.5	10396.7	11487.5	10443	6373.98	6870.64	1
ENSMUSG00000058006	Mdn1	2081.2	-0.270005	0.176216	20.1994	4.10918e-05	0.000560606	1850.99	1978.36	1807.57	2715.5	2686.3	2403.21	1563.7	1644	3
ENSMUSG00000117575		137.469	3.54174	0.829734	20.1958	4.11653e-05	0.000561225	16.8981	23.7603	24.9476	28.6647	329.054	298.398	225.346	152.681	3
ENSMUSG00000057561	Eif1a	1241.45	0.0388227	0.244451	20.1849	4.13899e-05	0.000563902	950.193	941.657	968.42	1473.36	1843.1	1836.7	1068.95	849.236	3
ENSMUSG00000029683	Lmod2	5598.12	-1.12333	0.243555	20.1771	4.1553e-05	0.000565738	6829.43	6410.27	8603.51	4606.41	5426.46	6733.99	2406.58	3768.33	1
ENSMUSG00000103614	Gm37949	147.025	-0.939619	0.321087	20.1698	4.17042e-05	0.00056741	236.573	165.071	271.021	95.5489	75.4083	130.048	101.839	100.687	1
ENSMUSG00000096188	Cmtm4	991.172	-1.43675	0.396871	20.1531	4.20552e-05	0.000571796	1566.32	1975.85	1197.48	779.679	419.153	798.102	657.982	534.796	1
ENSMUSG00000006219	Fblim1	192.226	1.21106	0.316279	20.1362	4.2411e-05	0.000576241	152.083	82.5357	91.8525	304.801	183.134	207.542	283.127	232.735	2
ENSMUSG00000097328	Tnfsf12	93.3729	1.19562	0.36722	20.1333	4.24727e-05	0.000576688	89.6899	61.2765	77.1107	58.2848	57.7804	57.0073	184.9	160.934	2
ENSMUSG00000059901	Adamts14	131.071	1.79288	0.403427	20.1282	4.258e-05	0.000577508	64.9927	73.7819	70.3068	79.3056	166.486	86.4017	239.069	268.223	2
ENSMUSG00000027852	Nras	1622.81	0.776283	0.22552	20.1277	4.2591e-05	0.000577508	1094.48	1125.49	1109.03	1567.96	2262.25	2077.2	1816.49	1929.56	3
ENSMUSG00000058470	Gm8369	97.0762	2.5281	0.627974	20.1143	4.28776e-05	0.000581	32.4963	25.0108	24.9476	60.1958	156.693	182.602	184.9	109.765	3
ENSMUSG00000026317	Cln8	657.676	1.03354	0.26112	20.1122	4.29232e-05	0.000581223	503.043	513.972	563.589	414.682	621.874	567.401	1067.51	1009.35	2
ENSMUSG00000022270	Retreg1	7590.52	-1.46847	0.327419	20.0881	4.3444e-05	0.000587823	13567.9	6914.24	12714.2	9656.17	3455.07	7575.74	3627.93	3212.9	1
ENSMUSG00000037400	Atp11b	1417.45	0.423966	0.264439	20.0869	4.34694e-05	0.000587823	1009.99	931.653	974.09	1580.38	2064.42	2262.48	1404.08	1112.51	3
ENSMUSG00000037709	Fam13a	2481.09	-1.34546	0.455384	20.0703	4.38312e-05	0.000592314	4042.54	4216.82	3323.7	2765.19	633.626	937.948	2767.71	1161.2	1
ENSMUSG00000004360	9330159F19Rik	1025.62	-0.547088	0.450418	20.0679	4.38837e-05	0.00059234	1857.49	1448.13	1439.02	241.739	440.698	801.665	870.328	1105.91	1
ENSMUSG00000027475	Kif3b	490.055	1.20095	0.269394	20.0675	4.38924e-05	0.00059234	311.965	351.402	320.917	506.409	467.14	343.825	899.941	718.839	2
ENSMUSG00000075225	Ccdc162	148.409	-1.54786	0.398645	20.0652	4.39433e-05	0.000592626	191.078	258.862	265.352	128.036	76.3876	108.67	89.5607	69.3254	1
ENSMUSG00000023826	Park2	497.63	-0.88941	0.235836	20.0589	4.4082e-05	0.000593989	621.33	701.553	721.212	325.822	445.595	466.747	343.075	355.705	1
ENSMUSG00000118607		136.953	2.45213	0.651708	20.0557	4.41532e-05	0.000593989	44.195	22.5097	39.6893	78.3501	281.067	283.255	197.178	149.38	3
ENSMUSG00000037752	Xkr8	111.193	1.52116	0.527203	20.0552	4.41633e-05	0.000593989	42.8952	48.7711	31.7515	103.193	194.886	244.063	124.952	99.0363	3
ENSMUSG00000039699	Batf2	90.3149	5.61326	1.36851	20.0563	4.41397e-05	0.000593989	2.59971	2.50108	2.26796	5.73293	260.501	267.222	143.73	37.9639	3
ENSMUSG00000107881	Gm44250	866.198	-1.0997	0.321806	20.03	4.47235e-05	0.00060086	1336.25	1454.38	1084.09	491.121	575.845	819.48	597.312	571.109	1
ENSMUSG00000021950	Anxa8	134.464	1.52616	0.486803	20.0295	4.47344e-05	0.00060086	36.3959	53.7733	66.9049	267.537	136.127	215.559	203.678	95.7351	3
ENSMUSG00000040188	Scamp2	976.074	1.23745	0.282758	20.01	4.51736e-05	0.000605167	631.729	611.514	597.608	813.121	1241.79	998.519	1589.7	1324.61	2
ENSMUSG00000062524	Ncr1	49.7507	5.64459	1.24699	20.0109	4.51534e-05	0.000605167	2.59971	0	4.53592	10.5104	135.147	61.461	106.173	77.5784	3
ENSMUSG00000031627	Irf2	1716.38	0.905544	0.353775	20.0101	4.51715e-05	0.000605167	959.292	930.402	954.812	1582.29	2796.96	3191.52	1916.89	1398.89	3
ENSMUSG00000003037	Rab8a	705.951	1.10656	0.294595	20.0099	4.51762e-05	0.000605167	363.959	427.685	449.056	880.961	974.432	730.406	1049.45	771.658	3
ENSMUSG00000053214	Gm9899	70.7616	-2.80076	0.836038	20.0015	4.53652e-05	0.000607292	113.087	245.106	90.7185	34.3976	5.87597	16.0333	47.6694	13.2048	1
ENSMUSG00000029185	Fam114a1	354.425	1.18537	0.313553	19.989	4.56503e-05	0.000610698	288.567	255.11	250.61	355.442	208.597	204.87	616.091	656.116	2
ENSMUSG00000019838	Slc16a10	1138.55	0.248754	0.245754	19.9848	4.57461e-05	0.000611162	1156.87	1285.56	1375.52	695.596	889.23	684.979	1596.2	1424.47	1
ENSMUSG00000022546	Gpt	598.827	-1.06935	0.281775	19.9861	4.57156e-05	0.000611162	826.707	722.813	1050.07	326.777	493.582	643.114	326.463	401.097	1
ENSMUSG00000040212	Emp3	350.309	2.00811	0.451971	19.9746	4.59805e-05	0.000613745	181.979	141.311	183.705	172.944	464.202	217.34	665.205	775.784	2
ENSMUSG00000066684	Pilrb1	32.9673	2.19541	0.686093	19.9737	4.60009e-05	0.000613745	6.49927	7.50325	10.2058	77.3946	40.1525	45.4277	47.6694	28.8856	3
ENSMUSG00000039959	Hip1	2072.2	1.07314	0.239718	19.962	4.62702e-05	0.000616926	1627.42	1245.54	1521.8	2132.65	2063.45	1579.28	3541.98	2865.45	2
ENSMUSG00000000340	Dbt	1122.35	-1.04094	0.238587	19.9387	4.68124e-05	0.000623739	1392.14	1700.74	1375.52	904.848	1062.57	1105.41	758.377	679.224	1
ENSMUSG00000025188	Hps1	167.615	1.49291	0.334597	19.9318	4.6974e-05	0.000625475	98.7889	78.7841	98.6563	230.273	151.796	135.392	323.574	223.657	2
ENSMUSG00000038866	Zcchc2	1722.15	0.799396	0.378739	19.9241	4.71566e-05	0.000627488	950.193	884.132	930.998	1494.38	3092.72	3455.18	1641.71	1327.91	3
ENSMUSG00000017677	Wsb1	789.46	1.18697	0.304802	19.9164	4.73368e-05	0.000629047	430.252	392.67	560.187	922.047	1121.33	837.295	1132.51	919.387	3
ENSMUSG00000021676	Iqgap2	575.412	1.90857	0.445092	19.9171	4.73215e-05	0.000629047	193.678	145.063	489.88	784.457	728.621	684.088	888.384	689.128	3
ENSMUSG00000050931	Sgms2	567.635	0.332048	0.404049	19.9096	4.75e-05	0.000630521	337.962	236.352	400.295	758.658	1274.11	710.81	398.69	424.206	3
ENSMUSG00000031785	Adgrg1	904.171	-0.736314	0.209429	19.9091	4.75108e-05	0.000630521	938.494	821.605	1109.03	1034.79	1082.16	1166.87	537.364	543.049	3
ENSMUSG00000026536	Ifi211	1184.7	2.2401	0.646401	19.9025	4.7668e-05	0.000632187	304.166	310.134	294.835	501.632	3017.31	2491.4	1627.98	930.116	3
ENSMUSG00000115681		41.5822	2.83604	0.709592	19.8997	4.77345e-05	0.000632648	10.3988	7.50325	9.07185	39.1751	85.2016	45.4277	83.0603	52.8194	3
ENSMUSG00000035878	Hykk	84.347	0.69898	0.49513	19.8815	4.81706e-05	0.000638005	74.0917	55.0238	192.777	38.2196	28.4005	37.4111	141.564	107.289	1
ENSMUSG00000083435	Gm15824	151.92	-1.25592	0.460769	19.878	4.82553e-05	0.000638703	244.372	218.845	312.979	37.2641	90.0982	130.939	91.7275	89.1327	1
ENSMUSG00000102752	Gm7694	152.963	0.415507	0.599823	19.8739	4.83558e-05	0.000639609	48.0946	75.0325	41.9573	463.412	179.217	209.324	165.398	41.2651	3
ENSMUSG00000029163	Emilin1	377.353	1.2576	0.287559	19.8644	4.85856e-05	0.000642224	223.575	222.596	246.074	493.032	362.352	348.279	540.253	582.664	2
ENSMUSG00000047414	Flrt2	588.406	0.650166	0.258647	19.8607	4.86752e-05	0.000642276	561.537	571.497	572.66	341.11	434.822	439.134	690.484	1096	2
ENSMUSG00000036966	Spryd3	353.825	1.10028	0.24777	19.8602	4.8686e-05	0.000642276	226.175	256.361	234.734	386.018	353.538	312.649	551.087	510.037	2
ENSMUSG00000109812	Gm45640	147.702	1.53147	0.377103	19.8609	4.86707e-05	0.000642276	64.9927	83.7862	85.0486	141.412	147.879	263.659	217.401	177.44	3
ENSMUSG00000022994	Adcy6	1450.84	-0.777393	0.275754	19.8579	4.87438e-05	0.000642614	1876.99	2110.91	2154.56	1187.67	763.876	1177.56	1380.25	954.875	1
ENSMUSG00000026670	Uap1	3854.73	-0.855077	0.324792	19.8522	4.88831e-05	0.000644025	3646.09	3256.41	3475.65	3499	5783.91	7649.67	1783.27	1743.86	3
ENSMUSG00000071379	Hpcal1	377.744	1.49652	0.34778	19.8497	4.89422e-05	0.000644378	205.377	157.568	249.476	403.216	509.251	368.766	629.814	498.483	2
ENSMUSG00000029260	Ugt2b34	30.8001	0.846494	1.20801	19.8313	4.93951e-05	0.000649577	0	5.00216	225.662	0	0	3.56296	1.44453	10.7289	1
ENSMUSG00000099843	Gm7160	171.948	0.4501	0.399635	19.8297	4.94346e-05	0.000649577	79.2911	108.797	107.728	180.587	293.799	367.875	134.341	103.163	3
ENSMUSG00000024308	Tapbp	4160.57	2.17541	0.545492	19.8307	4.94109e-05	0.000649577	1312.85	1543.17	1507.06	2148.89	7798.39	7412.73	7637.94	3923.49	3
ENSMUSG00000031812	Map1lc3b	5304.35	-0.199259	0.171493	19.8265	4.95134e-05	0.000650185	4932.94	4717.04	4496.23	7041.95	6460.63	6372.35	4578.43	3835.18	3
ENSMUSG00000097471	5830432E09Rik	112.704	2.06163	0.460068	19.8178	4.97309e-05	0.000652612	37.6958	46.27	45.3592	154.789	133.189	72.1499	246.292	165.886	2
ENSMUSG00000021367	Edn1	89.7972	0.298207	0.52072	19.8055	5.00357e-05	0.000656181	41.5953	38.7668	54.4311	116.57	215.452	145.191	64.2815	42.0904	3
ENSMUSG00000005057	Sh2b2	545.535	-1.38272	0.325404	19.8041	5.00709e-05	0.000656212	709.72	1032.95	602.144	494.943	564.093	260.096	401.579	298.76	1
ENSMUSG00000033022	Cdo1	3399.45	-2.06176	0.427627	19.8002	5.01697e-05	0.000657075	4247.92	5648.69	4558.6	5147.22	2308.28	2403.21	2096.01	785.688	1
ENSMUSG00000042895	Abra	6087.57	-0.878236	0.328367	19.7845	5.05661e-05	0.000661833	10428.7	7433.21	9342.87	3353.77	3858.55	4720.03	3536.2	6027.18	1
ENSMUSG00000034390	Cmip	1089.24	0.85819	0.266632	19.7786	5.07149e-05	0.000663345	696.721	585.253	789.251	1452.34	1499.35	1180.23	1380.97	1129.84	3
ENSMUSG00000032870	Smap2	728.878	0.736593	0.247852	19.7742	5.08259e-05	0.000664363	508.243	433.938	480.808	960.267	1042.99	747.33	825.548	831.905	3
ENSMUSG00000041729	Coro2b	227.213	-0.719809	0.352941	19.7671	5.10076e-05	0.000666302	365.259	288.875	364.008	184.409	82.2636	140.737	201.512	190.645	1
ENSMUSG00000112329	AC109214.3	233.675	-0.571089	0.31346	19.7588	5.122e-05	0.000668638	276.869	411.428	305.041	92.6824	192.928	150.535	196.456	243.464	1
ENSMUSG00000033730	Egr3	119.991	-2.19873	0.528641	19.7514	5.14093e-05	0.000670672	244.372	185.08	197.313	100.326	78.3463	49.8814	30.3351	74.2772	1
ENSMUSG00000083186	Gm11805	56.0828	2.1205	0.73517	19.7379	5.17558e-05	0.000674751	12.9985	7.50325	20.4117	67.8397	138.085	94.4184	74.3932	33.0121	3
ENSMUSG00000034484	Snx2	1501.22	1.4612	0.375932	19.7325	5.18963e-05	0.000676141	829.307	771.584	681.523	1144.68	2400.33	2017.52	2323.52	1841.25	3
ENSMUSG00000070348	Ccnd1	454.899	1.46867	0.483891	19.7283	5.20059e-05	0.000677128	140.384	202.588	168.963	1162.83	467.14	448.042	466.582	582.664	2
ENSMUSG00000104823	Gm43182	45.0916	2.48223	0.87728	19.7247	5.20988e-05	0.000677895	5.19941	2.50108	15.8757	137.59	73.4496	52.5536	45.5026	28.0603	3
ENSMUSG00000036565	Ttyh3	695.34	1.99858	0.434734	19.714	5.23782e-05	0.000681088	271.669	251.359	307.309	1256.47	569.969	379.455	1415.64	1110.86	2
ENSMUSG00000089679	Gm16299	161.563	-1.53365	0.365802	19.7024	5.26829e-05	0.000683724	298.966	211.341	219.992	146.19	89.1189	166.568	85.2271	75.1025	1
ENSMUSG00000022443	Myh9	10375.3	0.779738	0.255745	19.7024	5.26837e-05	0.000683724	6929.52	5952.57	7070.37	15907.9	13071.1	10406.5	11299.1	12365.5	2
ENSMUSG00000056130	Ticam2	63.8324	3.33915	0.734377	19.7025	5.26823e-05	0.000683724	22.0975	5.00216	29.4835	30.5757	59.739	41.8647	167.565	154.332	2
ENSMUSG00000024927	Rela	1100.76	0.0100973	0.227964	19.6883	5.30556e-05	0.000688103	821.507	869.126	930.998	1230.67	1667.8	1589.08	873.217	823.652	3
ENSMUSG00000022089	Bin3	283.734	1.16071	0.301313	19.6801	5.32737e-05	0.000690036	167.681	152.566	154.221	443.347	331.013	239.609	446.359	335.073	2
ENSMUSG00000031441	Atp11a	2543.04	0.542929	0.270149	19.6806	5.326e-05	0.000690036	1717.11	1651.96	1730.45	2731.74	3619.6	4176.68	2671.65	2045.1	3
ENSMUSG00000035279	Ssc5d	365.23	0.769683	0.30489	19.6375	5.44213e-05	0.000704443	311.965	417.681	333.39	207.341	199.783	297.507	506.307	647.863	2
ENSMUSG00000034612	Chst11	486.169	-0.104916	0.245238	19.6312	5.45926e-05	0.000706203	431.551	340.147	400.295	653.555	681.613	656.475	408.801	316.916	3
ENSMUSG00000041828	Abca8a	2284.62	-0.274262	0.357204	19.6261	5.47332e-05	0.000707564	3371.82	3235.15	2967.63	1159.96	800.111	1916.87	2268.63	2556.79	1
ENSMUSG00000023994	Nfya	619.143	0.794534	0.214877	19.6096	5.51854e-05	0.000712948	460.148	397.672	430.913	740.504	742.331	663.601	802.435	715.537	3
ENSMUSG00000066677	Ifi208	666.237	5.24034	1.23873	19.6068	5.52631e-05	0.000713491	16.8981	32.5141	18.1437	135.679	2134.94	1718.24	855.883	417.603	3
ENSMUSG00000115230		17.8706	8.20945	1.85832	19.5999	5.54542e-05	0.000715014	0	0	0	0	8.81396	1.78148	67.1705	65.1989	2
ENSMUSG00000079507	H2-Q1	283.146	2.13748	0.497152	19.5987	5.54885e-05	0.000715014	111.787	115.05	107.728	179.632	466.16	316.212	609.591	359.007	2
ENSMUSG00000091144	Phf11c	232.885	2.59501	0.850098	19.5993	5.5472e-05	0.000715014	27.2969	27.5119	43.0913	55.4184	618.936	812.354	188.511	89.958	3
ENSMUSG00000098788	Gm27342	39.1058	-0.572789	0.893241	19.5933	5.56373e-05	0.00071647	92.2896	60.026	61.235	0	4.89664	9.79813	43.3358	41.2651	1
ENSMUSG00000029414	Kntc1	61.6931	3.34532	0.950188	19.59	5.57291e-05	0.000717189	2.59971	22.5097	1.13398	134.724	69.5323	90.8554	65.726	106.464	2
ENSMUSG00000032000	Birc3	999.629	0.315027	0.339269	19.5855	5.58544e-05	0.000718338	668.125	642.778	584	1062.5	1871.5	1601.55	889.829	676.748	3
ENSMUSG00000058486	Wdr91	307.637	1.41935	0.318701	19.5809	5.5983e-05	0.000719529	161.182	192.583	198.447	304.801	331.992	277.911	586.478	407.699	2
ENSMUSG00000082154	Gm16464	30.0334	2.40906	0.806732	19.5771	5.60904e-05	0.000720445	2.59971	10.0043	6.80389	22.9317	69.5323	76.6036	24.557	27.235	3
ENSMUSG00000091649	Phf11b	729.701	6.49587	1.3676	19.5731	5.62014e-05	0.000721407	12.9985	20.0087	12.4738	96.5044	1903.81	1661.23	1558.65	571.935	3
ENSMUSG00000053581	Zfand2a	486.087	1.12424	0.254516	19.5361	5.7251e-05	0.000734408	319.764	352.653	327.72	450.991	520.024	425.773	824.103	667.67	2
ENSMUSG00000062825	Actg1	4866.49	0.555736	0.264845	19.5292	5.74488e-05	0.000736472	3068.95	3111.35	3486.99	5053.58	8622.01	6163.03	4527.87	4898.17	3
ENSMUSG00000064090	Vrk2	247.778	1.49105	0.360817	19.52	5.77132e-05	0.000739388	150.783	131.307	111.13	219.762	331.013	277.02	437.692	323.519	2
ENSMUSG00000026020	Nop58	810.614	-0.410235	0.205639	19.5095	5.80181e-05	0.000742818	752.615	787.841	678.121	1115.06	1100.77	865.799	552.532	632.182	3
ENSMUSG00000028757	Ddost	1320.17	0.832797	0.189108	19.5044	5.81679e-05	0.000744258	976.19	1021.69	1001.31	1371.13	1354.41	1197.15	1811.44	1828.05	2
ENSMUSG00000037306	Man1c1	436.995	1.14625	0.278421	19.5019	5.82385e-05	0.000744685	297.666	312.635	356.07	440.48	331.013	312.649	772.822	672.622	2
ENSMUSG00000018986	Slfn3	227.974	1.56145	0.573684	19.4804	5.88692e-05	0.000752268	76.6914	68.7797	73.7088	134.724	450.491	647.567	199.345	172.488	3
ENSMUSG00000002103	Acp2	931.536	1.25237	0.3174	19.4652	5.93169e-05	0.00075702	657.726	727.815	669.049	586.67	829.491	678.743	2002.12	1300.68	2
ENSMUSG00000004846	Plod3	1373.77	1.14858	0.337142	19.4661	5.92899e-05	0.00075702	763.014	826.608	709.872	1195.32	2068.34	2159.15	1818.66	1449.23	3
ENSMUSG00000035352	Ccl12	281.349	3.7013	0.844164	19.4586	5.95151e-05	0.000758882	40.2955	47.5206	36.2874	51.5964	762.897	332.246	634.148	345.802	3
ENSMUSG00000066170	E230001N04Rik	125.746	-0.146089	0.566029	19.4578	5.95388e-05	0.000758882	28.5968	87.5379	95.2544	268.492	214.473	195.963	51.2807	64.3736	3
ENSMUSG00000030411	Nova2	235.916	-0.901073	0.313455	19.4525	5.96946e-05	0.000760382	324.963	352.653	361.74	190.142	118.499	176.366	203.678	159.283	1
ENSMUSG00000050241	Klre1	24.8695	5.54864	1.4947	19.4499	5.97746e-05	0.000760916	2.59971	0	0	13.3768	59.739	40.0833	47.6694	35.488	3
ENSMUSG00000033847	Pla2g4c	52.4606	3.92757	0.99394	19.4377	6.01385e-05	0.000765061	11.6987	2.50108	3.40194	25.7982	86.1809	122.031	117.729	50.3435	3
ENSMUSG00000033544	Angptl1	136.537	0.104253	0.421644	19.4309	6.03443e-05	0.00076719	181.979	188.832	164.427	53.5074	48.9664	84.6202	137.23	232.735	1
ENSMUSG00000026473	Glul	22998.5	-1.16564	0.275126	19.4225	6.05975e-05	0.000769919	24577.6	30161.8	24698.1	30803.1	22755.7	26398.8	14813.6	9779.01	3
ENSMUSG00000031709	Tbc1d9	357.443	2.12026	0.501934	19.4171	6.07612e-05	0.000771509	140.384	136.309	122.47	197.786	712.951	359.859	638.481	551.302	3
ENSMUSG00000026657	Frmd4a	970.304	2.10665	0.547683	19.3999	6.12859e-05	0.000777677	388.656	318.888	285.763	498.765	1855.83	1672.81	1578.87	1162.85	3
ENSMUSG00000021610	Clptm1l	1333.75	0.777477	0.201723	19.3814	6.18554e-05	0.000784405	869.602	969.169	1039.86	1505.85	1588.47	1442.11	1625.82	1629.15	3
ENSMUSG00000028744	Pqlc2	189.065	1.16182	0.308429	19.3785	6.19455e-05	0.00078505	139.084	148.814	139.48	149.056	146.899	121.141	384.967	283.079	2
ENSMUSG00000061462	Obscn	95077.8	-0.962557	0.233958	19.3605	6.25072e-05	0.000791665	120730	135260	122480	69404.8	89981.7	91407.7	48466.1	82891.7	1
ENSMUSG00000036617	Etl4	2135.81	-0.745969	0.272566	19.3351	6.33035e-05	0.000801242	3271.73	2826.22	2920	1405.52	1325.03	1907.96	1474.86	1955.14	1
ENSMUSG00000041220	Elovl6	2050.97	-3.04994	0.65136	19.3321	6.34001e-05	0.000801782	2859.68	7229.38	1602.32	1222.07	1034.17	1459.03	740.32	260.796	1
ENSMUSG00000021646	Mccc2	727.888	-0.939695	0.22578	19.3313	6.34264e-05	0.000801782	930.695	1019.19	932.132	573.293	655.171	734.86	499.084	478.676	1
ENSMUSG00000031304	Il2rg	209.264	3.27641	0.762547	19.3243	6.36471e-05	0.000804063	42.8952	28.7624	49.8952	64.0178	497.499	287.709	432.636	270.699	3
ENSMUSG00000020733	Slc9a3r1	416.114	2.08665	0.536811	19.3109	6.40765e-05	0.000808976	101.389	98.7927	179.169	920.136	586.618	285.927	683.984	472.898	2
ENSMUSG00000035963	Odf3l2	69.5571	-4.54487	0.937824	19.3043	6.4286e-05	0.000811108	51.9941	141.311	261.95	51.5964	24.4832	13.3611	4.33358	7.42772	1
ENSMUSG00000021238	Aldh6a1	4529.96	-1.18354	0.262837	19.3011	6.43893e-05	0.000811898	5498.38	6406.52	5632.48	3808.58	4651.81	5241.11	2832.72	2168.07	1
ENSMUSG00000073491	Ifi213	912.821	6.68104	1.44008	19.2997	6.44348e-05	0.000811959	16.8981	17.5076	4.53592	132.813	2345.49	2240.21	1678.54	866.568	3
ENSMUSG00000023973	Cnpy3	427.221	1.16752	0.264675	19.2938	6.46264e-05	0.00081386	282.068	266.365	284.629	485.388	441.677	341.153	739.598	576.887	2
ENSMUSG00000036528	Ppfibp2	539.384	-0.271844	0.282888	19.2896	6.47605e-05	0.000814538	783.812	650.281	721.212	372.641	244.832	425.773	550.365	566.158	1
ENSMUSG00000085786	Gm15987	99.0718	2.41539	0.551896	19.2896	6.47618e-05	0.000814538	53.294	20.0087	31.7515	83.1276	125.354	80.1665	258.57	140.301	2
ENSMUSG00000021036	Sptlc2	1124.78	1.05776	0.357831	19.2857	6.48863e-05	0.00081559	609.631	632.774	590.804	991.798	1836.24	1925.78	1367.25	1044.01	3
ENSMUSG00000066682	Pilrb2	36.32	2.01559	0.8035	19.2837	6.49528e-05	0.000815913	3.89956	7.50325	9.07185	120.392	46.0284	41.8647	35.3909	26.4097	3
ENSMUSG00000033102	Cdc14b	414.91	-0.0323914	0.265545	19.2689	6.54354e-05	0.000821124	514.742	498.966	544.311	256.071	220.349	336.699	434.803	513.338	1
ENSMUSG00000018168	Ikzf3	86.8588	2.31957	0.58687	19.2685	6.54498e-05	0.000821124	33.7962	20.0087	22.6796	72.6172	181.176	85.511	155.287	123.795	3
ENSMUSG00000024736	Tmem132a	165.624	0.674469	0.349154	19.2592	6.57534e-05	0.000824415	66.2925	123.804	103.192	237.917	269.315	210.214	134.341	179.916	3
ENSMUSG00000026313	Hdac4	2246.27	-0.856458	0.225789	19.2459	6.61935e-05	0.000829412	2935.07	3181.38	2882.58	1969.26	1708.93	1977.44	1461.86	1853.63	1
ENSMUSG00000032515	Csrnp1	1162.39	-0.216217	0.542152	19.2321	6.66512e-05	0.000834624	551.138	478.957	683.79	694.641	2727.43	3350.07	473.083	340.025	3
ENSMUSG00000040511	Pvr	822.727	0.159904	0.353964	19.213	6.72899e-05	0.000842093	587.534	385.167	652.039	1164.74	1551.26	1045.73	616.813	578.537	3
ENSMUSG00000024952	Rps6ka4	386.727	0.909945	0.236459	19.2104	6.73764e-05	0.000842648	245.672	282.622	260.816	426.148	428.946	480.108	487.528	481.977	2
ENSMUSG00000038167	Plekhg6	82.3988	-0.547049	0.507016	19.2035	6.76093e-05	0.000845032	51.9941	56.2743	41.9573	239.828	96.9535	92.6369	44.0581	35.488	3
ENSMUSG00000032194	Kank2	925.478	-0.0225042	0.190387	19.1823	6.83309e-05	0.000852871	1039.88	1163	1021.72	618.201	747.228	663.601	1022	1128.19	2
ENSMUSG00000004951	Hspb1	6697.54	1.17987	0.451815	19.1817	6.83496e-05	0.000852871	2851.88	2293.49	3043.6	12411.8	13288.5	5020.21	5141.07	9529.77	3
ENSMUSG00000042354	Gnl3	1004.68	-0.546281	0.213717	19.1813	6.83646e-05	0.000852871	1012.59	961.666	894.711	1456.17	1265.29	1061.76	662.316	722.965	3
ENSMUSG00000035852	Misp	25.8544	3.65153	1.01781	19.1601	6.9093e-05	0.00086142	1.29985	5.00216	2.26796	34.3976	25.4625	76.6036	41.169	20.6326	3
ENSMUSG00000000386	Mx1	4400.18	6.48324	1.50315	19.1359	6.99349e-05	0.000871372	36.3959	26.2614	45.3592	305.757	12615.7	17377.4	3254.52	1540.01	3
ENSMUSG00000039193	Nlrc4	63.2797	2.98039	0.68144	19.1325	7.00552e-05	0.000872328	22.0975	17.5076	13.6078	25.7982	84.2223	57.0073	170.454	115.542	2
ENSMUSG00000022037	Clu	2454.05	1.32441	0.384043	19.1195	7.05112e-05	0.000877458	876.101	1230.53	1545.62	3453.14	4027.98	2461.11	3528.98	2508.92	3
ENSMUSG00000041515	Irf8	803.95	2.73977	0.672592	19.1011	7.11616e-05	0.000885	217.076	208.84	197.313	259.893	1535.59	1561.47	1588.98	862.441	3
ENSMUSG00000004612	Nkg7	50.7297	4.32917	1.00291	19.0994	7.12234e-05	0.000885218	2.59971	5.00216	6.80389	19.1098	169.424	47.2092	94.6166	61.0724	3
ENSMUSG00000031767	Nudt7	575.174	-0.747749	0.274332	19.0833	7.17981e-05	0.000891032	760.414	924.15	738.222	387.929	369.207	474.764	508.474	438.236	1
ENSMUSG00000049641	Vgll2	1486.64	-1.51027	0.352892	19.0827	7.18206e-05	0.000891032	2400.83	1684.48	2536.72	919.181	1203.59	1736.05	513.53	898.755	1
ENSMUSG00000074419	Gm15448	58.1524	4.72002	0.945831	19.0813	7.18697e-05	0.000891032	3.89956	2.50108	11.3398	66.8842	41.1318	11.5796	183.455	144.428	2
ENSMUSG00000074419	Gm15448	58.1524	4.72002	0.945831	19.0813	7.18697e-05	0.000891032	3.89956	2.50108	11.3398	66.8842	41.1318	11.5796	183.455	144.428	2
ENSMUSG00000000732	Icosl	255.257	1.05444	0.287843	19.0815	7.1863e-05	0.000891032	202.777	145.063	116.8	365.952	243.853	290.381	384.244	292.982	2
ENSMUSG00000046223	Plaur	565.854	1.03611	0.602413	19.0413	7.33233e-05	0.000908463	175.48	157.568	207.519	289.513	1810.78	1213.19	340.186	332.597	3
ENSMUSG00000023186	Vwa5a	2568.49	1.24298	0.342994	19.0401	7.33666e-05	0.000908463	1515.63	1443.12	1323.36	2161.32	3610.78	3987.84	3713.88	2792	3
ENSMUSG00000057280	Musk	649.746	-0.125777	0.316324	19.0293	7.37642e-05	0.00091282	374.358	505.219	569.258	965.999	1130.15	746.44	356.076	550.477	3
ENSMUSG00000062345	Serpinb2	65.3689	2.068	0.696128	19.0261	7.38814e-05	0.000913705	15.5982	13.7559	15.8757	76.4391	195.866	63.2425	91.0052	51.1688	3
ENSMUSG00000031557	Plekha2	669.902	1.40949	0.405434	19.0176	7.41979e-05	0.000917051	332.763	328.892	324.319	557.05	1040.05	1128.57	1016.23	631.356	3
ENSMUSG00000021943	Gdf10	114.594	-0.429588	0.541161	19.0151	7.42885e-05	0.000917603	163.782	210.091	142.882	61.1513	25.4625	30.2851	98.2279	184.868	1
ENSMUSG00000070327	Rnf213	24239	3.71932	0.991639	18.9982	7.49181e-05	0.000924809	2023.87	2427.3	1935.71	8390.15	61857.3	69948.9	29505.2	17823.2	3
ENSMUSG00000070000	Fcho1	43.0306	3.35635	0.774182	18.9961	7.49964e-05	0.000925203	3.89956	17.5076	4.53592	39.1751	65.615	32.9574	111.229	69.3254	2
ENSMUSG00000037849	Ifi206	697.368	5.73296	1.36217	18.9937	7.50865e-05	0.000925743	18.1979	18.7581	6.80389	135.679	2264.21	1641.63	1030.67	462.995	3
ENSMUSG00000024399	Ltb	83.9377	1.6056	0.713024	18.9873	7.5328e-05	0.000928147	12.9985	15.0065	41.9573	235.05	147.879	92.6369	65.726	60.2471	3
ENSMUSG00000040896	Kcnd3	20.973	-3.55509	1.16878	18.9819	7.55327e-05	0.000930095	15.5982	18.7581	9.07185	49.6854	25.4625	46.3184	2.88906	0	3
ENSMUSG00000031906	Smpd3	145.044	-0.816228	0.513653	18.979	7.56424e-05	0.000930872	201.477	216.344	269.887	107.015	42.1111	34.7388	168.287	120.494	1
ENSMUSG00000078616	Trim30c	507.407	5.28909	1.30718	18.9549	7.65571e-05	0.000941549	5.19941	22.5097	20.4117	72.6172	1732.43	1663.9	353.187	188.994	3
ENSMUSG00000059248	Sept9	1632.88	0.779686	0.281268	18.9537	7.6605e-05	0.000941558	898.199	1428.12	783.581	1824.03	2453.22	1996.15	1905.33	1774.4	3
ENSMUSG00000037202	Prf1	93.3166	5.47498	1.17327	18.9504	7.67328e-05	0.000942549	3.89956	5.00216	4.53592	9.55489	315.344	62.3518	248.459	97.3857	3
ENSMUSG00000041075	Fzd7	1360.94	-0.386349	0.236982	18.9477	7.6835e-05	0.000943224	1753.5	1774.52	1834.78	950.712	822.636	1138.36	1162.12	1450.88	1
ENSMUSG00000073144	4930599N23Rik	51.4785	2.42242	0.826846	18.936	7.72873e-05	0.000948194	9.09897	8.75379	10.2058	27.7092	135.147	138.065	49.8362	33.0121	3
ENSMUSG00000052837	Junb	3510.27	-1.38135	0.418754	18.9288	7.75632e-05	0.000950995	4024.35	2852.48	3220.51	2823.47	6747.57	5887.79	1349.91	1176.06	3
ENSMUSG00000103577	9330162B11Rik	22.7233	-4.65956	1.15924	18.9274	7.76207e-05	0.000951115	46.7947	70.0303	34.0194	7.64391	5.87597	12.4704	0	4.95182	1
ENSMUSG00000110697	Gm31718	43.6125	2.42987	0.766933	18.9261	7.7671e-05	0.000951148	2.59971	15.0065	11.3398	70.7062	86.1809	66.8054	59.9479	36.3133	3
ENSMUSG00000021273	Fdft1	1848.17	-0.89994	0.20821	18.9122	7.82094e-05	0.000955983	2148.66	2404.79	1913.03	1978.82	2092.83	1835.81	1308.02	1103.43	1
ENSMUSG00000022235	Cmbl	727.631	-1.16401	0.324002	18.9123	7.82054e-05	0.000955983	993.088	1235.53	985.429	337.288	708.055	633.316	446.359	481.977	1
ENSMUSG00000051615	Rap2a	435.015	0.993698	0.238177	18.9141	7.81383e-05	0.000955983	285.968	322.64	281.227	395.572	545.486	448.933	582.145	618.152	2
ENSMUSG00000055110	A630012P03Rik	34.6341	7.18494	1.69848	18.9063	7.84439e-05	0.000958263	0	0	2.26796	4.77745	95.9742	89.9647	64.2815	19.8073	3
ENSMUSG00000063779	Chil4	10.6107	4.94536	1.66454	18.8975	7.87888e-05	0.000961888	0	0	0	18.1543	38.1938	10.6889	7.9449	9.90363	3
ENSMUSG00000090124	Ugt1a7c	94.0322	2.68526	0.72875	18.8548	8.04891e-05	0.000982045	20.7977	6.2527	32.8854	175.81	189.01	89.0739	104.728	133.699	3
ENSMUSG00000024909	Efemp2	288.683	1.41387	0.322606	18.8493	8.07084e-05	0.000983713	158.582	163.821	191.643	367.863	259.522	235.155	472.361	460.519	2
ENSMUSG00000021508	Cxcl14	1616.27	-0.257884	0.283764	18.8489	8.07242e-05	0.000983713	1441.54	1076.72	1386.86	2424.08	2252.46	2184.09	899.218	1265.19	3
ENSMUSG00000024074	Crim1	1822.9	-0.972293	0.325543	18.8337	8.13411e-05	0.000990625	2767.39	2434.8	2923.4	813.121	1171.28	2049.59	1118.79	1304.8	1
ENSMUSG00000030062	Rpn1	1719.23	0.763736	0.191852	18.8238	8.17444e-05	0.000994325	1230.96	1260.55	1283.67	1858.43	2054.63	1720.91	2173.29	2171.37	2
ENSMUSG00000032344	Mb21d1	184.269	1.72628	0.616503	18.8239	8.17424e-05	0.000994325	53.294	55.0238	61.235	111.792	474.974	387.472	200.789	129.573	3
ENSMUSG00000026121	Sema4c	652.272	-0.691582	0.35663	18.8109	8.22733e-05	0.000998932	558.937	518.974	518.229	604.825	1023.4	1385.1	303.351	305.362	3
ENSMUSG00000060445	Sycp2	60.0326	-0.399104	0.602888	18.8129	8.21934e-05	0.000998932	27.2969	42.5184	22.6796	175.81	71.491	86.4017	31.7796	22.2832	3
ENSMUSG00000000409	Lck	65.8445	3.70549	0.883477	18.8118	8.22356e-05	0.000998932	7.79912	8.75379	11.3398	29.6202	174.32	76.6036	153.12	65.1989	3
ENSMUSG00000114431	CT009480.3	63.8962	-2.06703	0.478392	18.7775	8.36615e-05	0.00101517	96.1892	107.547	98.6563	64.9733	40.1525	54.3351	30.3351	18.982	1
ENSMUSG00000038949	Cnst	1084.92	-0.451495	0.245727	18.7759	8.37277e-05	0.00101536	1247.86	1728.25	1342.63	732.86	725.683	815.917	1060.28	1025.85	1
ENSMUSG00000025509	Pnpla2	17800	-1.26395	0.28269	18.758	8.44797e-05	0.00102386	22162.5	22961.2	22875.8	18567.1	15526.3	21496.2	12176.6	6634.61	1
ENSMUSG00000085894	Gm15832	103.85	1.41872	0.587524	18.7541	8.46439e-05	0.00102522	42.8952	15.0065	60.101	202.564	187.052	139.846	97.5056	85.8315	3
ENSMUSG00000047881	Rell1	552.782	0.389829	0.281936	18.7521	8.47312e-05	0.00102566	396.455	370.16	351.534	597.181	941.135	777.615	483.917	504.26	3
ENSMUSG00000030339	Ltbr	870.889	0.416849	0.219058	18.7418	8.5165e-05	0.00103029	635.628	692.8	553.383	1087.35	1260.4	962.889	946.888	827.778	3
ENSMUSG00000021298	Gpr132	129.434	3.08034	0.7789	18.7377	8.53425e-05	0.00103181	19.4978	22.5097	32.8854	50.6409	369.207	196.853	221.735	122.145	3
ENSMUSG00000059657	Stfa2l1	45.825	0.871113	1.05576	18.7275	8.57757e-05	0.00103642	7.79912	2.50108	9.07185	199.697	89.1189	31.1759	5.77811	21.4579	3
ENSMUSG00000059657	Stfa2l1	45.825	0.871113	1.05576	18.7275	8.57757e-05	0.00103642	7.79912	2.50108	9.07185	199.697	89.1189	31.1759	5.77811	21.4579	3
ENSMUSG00000076617	Ighm	394.77	1.03418	0.322998	18.7191	8.6141e-05	0.0010402	306.765	412.678	294.835	200.653	277.15	334.027	676.761	655.29	2
ENSMUSG00000024339	Tap2	932.855	1.99236	0.541577	18.7122	8.64381e-05	0.00104316	272.969	438.94	311.845	622.979	1581.62	1836.7	1635.21	762.58	3
ENSMUSG00000061132	Blnk	91.5098	2.08145	0.503402	18.7109	8.64942e-05	0.00104321	37.6958	47.5206	56.699	37.2641	109.685	56.1166	179.121	207.976	2
ENSMUSG00000101111	Gm28437	975.187	-1.12544	0.343984	18.7093	8.65621e-05	0.00104339	1503.93	1288.06	1618.19	434.748	684.551	1050.18	471.638	750.2	1
ENSMUSG00000061577	Adgrg5	60.6498	5.12421	1.16705	18.7012	8.69147e-05	0.00104701	2.59971	11.2549	0	21.0208	105.767	110.452	158.176	75.9278	3
ENSMUSG00000078247	Airn	376.576	-0.0405061	0.295069	18.6987	8.70218e-05	0.00104767	315.864	247.607	266.486	511.187	662.026	437.353	276.627	295.458	3
ENSMUSG00000109245	Gm44860	46.3452	2.62635	0.600536	18.6965	8.71159e-05	0.00104817	15.5982	7.50325	26.0816	69.7507	32.3178	47.2092	111.229	61.0724	2
ENSMUSG00000104696	Gm42946	19.9766	-2.0354	0.987031	18.6898	8.74121e-05	0.0010511	53.294	46.27	31.7515	3.82196	0	4.4537	8.66717	11.5542	1
ENSMUSG00000031849	Comp	343.447	-0.183608	0.252629	18.6863	8.75648e-05	0.00105231	357.46	416.43	579.464	166.255	213.494	350.061	277.349	387.067	1
ENSMUSG00000042406	Atf4	4136.71	-0.321081	0.186654	18.68	8.7838e-05	0.00105495	3909.96	3709.1	3725.13	5076.51	5697.73	4757.44	2927.34	3290.48	3
ENSMUSG00000102813	Gm37795	47.3758	1.83332	0.552961	18.6666	8.84292e-05	0.00106142	33.7962	20.0087	44.2253	21.0208	26.4419	25.8314	88.8384	118.844	2
ENSMUSG00000100131	Gm28439	630.031	-1.10663	0.342084	18.6571	8.88499e-05	0.00106582	967.091	855.37	1026.25	320.089	396.628	673.399	300.462	500.959	1
ENSMUSG00000021115	Vrk1	299.972	0.895276	0.283805	18.6509	8.91279e-05	0.00106852	183.279	183.83	204.117	325.822	391.731	439.134	375.577	296.284	3
ENSMUSG00000064210	Ano6	2422.98	0.682238	0.202116	18.6495	8.91877e-05	0.00106859	1679.41	1799.53	1762.21	2634.28	3149.52	2718.54	2954.78	2685.53	3
ENSMUSG00000034792	Gna15	31.6109	2.37159	0.730289	18.6424	8.95082e-05	0.00107179	5.19941	7.50325	9.07185	50.6409	59.739	38.3018	23.8347	58.5965	3
ENSMUSG00000044042	Fmn1	148.932	2.42734	0.538017	18.6185	9.05814e-05	0.00108387	42.8952	38.7668	78.2447	234.095	142.003	106.889	250.626	297.934	2
ENSMUSG00000014543	Klra17	32.7186	2.68417	0.994214	18.6175	9.06256e-05	0.00108387	2.59971	2.50108	4.53592	127.08	52.8837	18.7055	24.557	28.8856	3
ENSMUSG00000006304	Arpc2	2549.89	1.16842	0.285724	18.6163	9.06807e-05	0.00108388	1618.32	1515.66	1589.84	2258.78	3666.61	2519.9	3833.05	3396.95	3
ENSMUSG00000046275	Tusc5	2140.44	-1.63028	0.43217	18.6074	9.10857e-05	0.00108807	3351.02	3343.95	3421.22	1665.42	832.429	2201.91	1764.49	543.049	1
ENSMUSG00000062382	Ftl1-ps1	69.0246	1.74736	0.409292	18.6033	9.12716e-05	0.00108964	36.3959	40.0173	32.8854	68.7952	61.6977	53.4444	128.563	130.398	2
ENSMUSG00000020620	Abca8b	969.577	-0.322873	0.354352	18.5923	9.17774e-05	0.00109502	1483.13	1340.58	1248.51	492.077	374.104	819.48	920.886	1077.85	1
ENSMUSG00000032523	Hhatl	3029.22	0.365273	0.305594	18.5907	9.18511e-05	0.00109525	1922.48	1885.82	1995.81	4820.44	5259.97	2820.97	2340.13	3188.14	3
ENSMUSG00000052942	Glis3	172.917	0.199502	0.409539	18.5736	9.2639e-05	0.00110399	127.386	101.294	74.8427	412.771	221.328	184.383	111.951	149.38	3
ENSMUSG00000022912	Pros1	791.128	0.482143	0.212426	18.5719	9.2717e-05	0.00110426	623.93	560.242	545.445	935.424	1023.4	1020.79	800.268	819.525	3
ENSMUSG00000076490	Trbc1	38.2633	4.71837	1.08599	18.5698	9.28151e-05	0.00110476	0	8.75379	2.26796	20.0653	110.664	26.7222	82.3381	55.2953	3
ENSMUSG00000078453	Abracl	112.632	1.70685	0.404369	18.5616	9.31946e-05	0.00110862	45.4949	60.026	66.9049	111.792	132.209	128.266	209.457	146.904	2
ENSMUSG00000054065	Pkp3	53.9558	2.40882	0.784315	18.5549	9.35104e-05	0.00111172	10.3988	15.0065	1.13398	204.475	44.0698	23.1592	83.0603	50.3435	2
ENSMUSG00000101279	Gm18342	78.2831	3.94527	1.09193	18.5515	9.36689e-05	0.00111294	5.19941	6.2527	6.80389	13.3768	205.659	257.424	96.0611	35.488	3
ENSMUSG00000098128	Gm3693	68.6304	-1.41888	0.620817	18.5464	9.39077e-05	0.00111511	149.483	120.052	106.594	13.3768	24.4832	43.6462	30.3351	61.0724	1
ENSMUSG00000020963	Tshr	210.738	-1.80932	0.460317	18.5369	9.43548e-05	0.00111976	387.356	187.581	505.755	197.786	109.685	95.3091	143.008	59.4218	1
ENSMUSG00000030772	Dkk3	1268.38	-1.27709	0.46643	18.5341	9.44849e-05	0.0011204	2268.24	2188.45	1810.97	380.285	577.804	1361.94	645.704	913.61	1
ENSMUSG00000038045	Sult6b1	32.1431	3.36995	0.799762	18.5334	9.45215e-05	0.0011204	3.89956	8.75379	11.3398	14.3323	43.0905	65.024	62.837	47.8676	3
ENSMUSG00000029406	Pitpnm2	1270.3	-0.635828	0.181606	18.5253	9.49025e-05	0.00112425	1419.44	1820.79	1596.65	965.999	1176.17	1115.21	902.83	1165.33	1
ENSMUSG00000021846	Peli2	784.162	-1.38199	0.322301	18.5239	9.49713e-05	0.0011244	1080.18	1165.5	1042.13	930.646	473.995	733.078	444.192	403.573	1
ENSMUSG00000028191	Bcl10	560.409	0.363252	0.236104	18.5061	9.58188e-05	0.00113376	440.65	373.912	383.286	798.789	803.049	592.342	553.976	537.272	3
ENSMUSG00000039153	Runx2	167.366	1.92081	0.567703	18.4996	9.61311e-05	0.00113678	29.8966	53.7733	94.1204	365.952	185.093	222.685	176.955	210.452	2
ENSMUSG00000033502	Cdc14a	1035.88	-0.848666	0.223596	18.4797	9.70931e-05	0.00114748	1310.25	1363.09	1454.9	691.774	975.411	1035.04	671.705	784.863	1
ENSMUSG00000056116	H2-T22	2448.14	2.50699	0.620942	18.4726	9.74383e-05	0.00115088	773.413	771.584	698.532	1029.06	4507.85	3910.35	5528.21	2366.14	3
ENSMUSG00000056116	H2-T22	2448.14	2.50699	0.620942	18.4726	9.74383e-05	0.00115088	773.413	771.584	698.532	1029.06	4507.85	3910.35	5528.21	2366.14	3
ENSMUSG00000117664		33.6241	-2.76618	0.772144	18.453	9.83956e-05	0.0011615	72.7918	60.026	69.1728	29.6202	4.89664	12.4704	10.1117	9.90363	1
ENSMUSG00000055994	Nod2	313.688	0.944594	0.52446	18.4504	9.85252e-05	0.00116234	116.987	128.806	142.882	216.896	831.45	624.408	249.181	198.898	3
ENSMUSG00000056124	B4galt6	287.849	1.73637	0.410964	18.422	9.99318e-05	0.00117824	197.578	110.048	193.911	248.427	252.667	177.257	482.472	640.435	2
ENSMUSG00000071656	Lrrn4cl	466.676	-0.344397	0.399068	18.417	0.000100183	0.0011805	704.521	579	698.532	364.997	151.796	211.105	456.471	566.983	1
ENSMUSG00000081219	Bambi-ps1	22.1377	4.62055	1.08571	18.4153	0.000100267	0.0011808	0	3.75162	4.53592	14.3323	29.3799	30.2851	58.5034	36.3133	2
ENSMUSG00000026459	Myog	409.824	0.583135	0.50126	18.4031	0.000100884	0.00118736	140.384	186.331	178.035	491.121	1169.32	371.438	121.34	620.628	3
ENSMUSG00000102151	Gm37472	383.382	1.17147	0.282848	18.3744	0.000102338	0.00120377	232.674	221.346	256.28	531.252	367.248	354.514	639.926	463.82	2
ENSMUSG00000039428	Tmem135	1109.93	-0.950602	0.28864	18.3703	0.00010255	0.00120546	1550.73	1768.26	1427.68	701.329	809.905	1027.91	885.495	708.11	1
ENSMUSG00000102411	Gm36936	242.595	-0.676651	0.25196	18.3693	0.000102603	0.00120546	378.257	278.871	332.256	215.941	143.961	175.476	248.459	167.536	1
ENSMUSG00000025880	Smad7	699.918	-0.647652	0.240941	18.3655	0.000102798	0.00120705	582.334	715.309	730.284	755.792	1130.15	802.556	348.131	534.796	3
ENSMUSG00000021456	Fbp2	1867.71	-1.18039	0.280749	18.3553	0.000103323	0.0012125	2669.9	2327.26	2651.25	1217.29	2035.04	1826.91	973.612	1240.43	1
ENSMUSG00000110199	Olfr542-ps1	9.27326	-0.653743	1.23573	18.3419	0.000104016	0.00121992	20.7977	16.257	13.6078	0	0	0	14.4453	9.07833	1
ENSMUSG00000026946	Nmi	297.405	2.23978	0.68377	18.3234	0.000104985	0.00123056	85.7903	75.0325	61.235	135.679	677.695	695.667	408.801	239.338	3
ENSMUSG00000022358	Fbxo32	17590.8	-1.75114	0.395065	18.2768	0.000107457	0.0012588	23893.9	18711.8	23535.8	33705.8	10055.7	18075.8	6576.21	6171.61	3
ENSMUSG00000036745	Ttll7	3839.03	-0.775586	0.251734	18.2408	0.00010941	0.00128092	5289.1	5399.84	4965.7	2247.31	3320.9	3392.83	2458.59	3637.93	1
ENSMUSG00000033209	Ttc28	1175.92	-0.456826	0.224839	18.2271	0.000110164	0.00128899	1645.61	1415.61	1530.87	965.044	761.918	876.487	1041.5	1170.28	1
ENSMUSG00000031402	Mpp1	1358.65	1.28356	0.337146	18.2233	0.000110371	0.00129066	802.01	720.312	789.251	1183.85	2026.23	1642.52	2167.51	1537.54	3
ENSMUSG00000028413	B4galt1	3093.89	-0.302073	0.233334	18.2191	0.000110606	0.00129264	2385.23	3133.86	2430.12	4722.03	4207.2	3263.67	2298.97	2310.02	3
ENSMUSG00000032436	Cmtm7	185.486	1.75738	0.410641	18.2166	0.000110743	0.00129287	76.6914	73.7819	120.202	236.006	222.308	155.879	319.241	279.778	2
ENSMUSG00000024349	Tmem173	516.764	1.12187	0.497456	18.2164	0.000110755	0.00129287	248.272	205.089	204.117	403.216	1197.72	945.074	546.031	384.591	3
ENSMUSG00000049401	Ogfr	1512.38	1.43129	0.477285	18.2079	0.000111227	0.00129763	608.331	702.804	635.029	1028.11	3088.8	2836.11	1937.11	1262.71	3
ENSMUSG00000033987	Dnah17	124.944	0.0156063	0.397957	18.1982	0.000111767	0.00130317	85.7903	62.527	102.058	151.923	219.37	224.466	81.6158	71.8013	3
ENSMUSG00000028173	Wls	662.43	0.439685	0.229677	18.1931	0.000112049	0.00130569	674.624	690.299	705.336	421.371	458.326	560.275	954.833	834.381	2
ENSMUSG00000040907	Atp1a3	376.96	1.67399	0.465812	18.1863	0.000112433	0.0013094	132.585	190.082	95.2544	882.872	368.228	224.466	522.197	599.995	2
ENSMUSG00000056019	Zfp709	156.912	1.06833	0.302833	18.185	0.000112505	0.00130948	140.384	115.05	116.8	113.703	125.354	106.889	278.794	258.32	2
ENSMUSG00000047446	Arl4a	1238	-1.37469	0.345429	18.1403	0.000115051	0.00133834	1696.31	1815.79	1877.87	865.673	690.427	1736.05	702.763	519.115	1
ENSMUSG00000025197	Cyp2c44	48.9634	-1.30631	0.536798	18.1377	0.000115196	0.00133924	96.1892	55.0238	111.13	16.2433	14.6899	43.6462	32.5019	22.2832	1
ENSMUSG00000102841	Gm38036	61.9744	-1.89801	0.437831	18.1281	0.000115752	0.00134492	92.2896	93.7906	91.8525	60.1958	60.7184	44.537	26.0015	26.4097	1
ENSMUSG00000036896	C1qc	602.064	1.88005	0.471743	18.1263	0.000115855	0.00134534	357.46	220.095	449.056	729.994	304.571	237.827	1368.69	1148.82	2
ENSMUSG00000106005	Gm29151	43.8623	-1.2841	0.500334	18.1182	0.000116329	0.0013494	55.8937	102.544	64.6369	21.0208	25.4625	16.0333	28.1683	37.1386	1
ENSMUSG00000002578	Ikzf4	59.0363	-1.97433	0.504446	18.118	0.00011634	0.0013494	72.7918	76.283	54.4311	73.5727	94.9949	62.3518	23.8347	14.0301	3
ENSMUSG00000022253	Nadk2	858.197	-0.707296	0.188838	18.1167	0.000116415	0.00134948	989.189	1096.72	1223.57	678.397	752.124	852.438	615.369	657.766	1
ENSMUSG00000032841	Prr5l	312.917	0.83741	0.416797	18.1152	0.000116502	0.0013497	187.179	101.294	223.394	320.089	533.734	618.173	286.739	232.735	3
ENSMUSG00000018167	Stard3	610.542	1.52037	0.389195	18.1004	0.000117368	0.00135895	337.962	331.393	284.629	420.415	862.789	890.739	936.054	820.351	3
ENSMUSG00000001918	Slc1a5	5863.03	-1.28394	0.294834	18.098	0.000117511	0.00135982	7572.95	7985.95	7999.1	6868.06	4477.49	5078.1	4599.38	2323.23	1
ENSMUSG00000034993	Vat1	1050.79	0.862537	0.276575	18.0908	0.000117932	0.0013639	1034.68	762.83	952.544	833.186	767.794	676.071	1483.53	1895.72	2
ENSMUSG00000030726	Pold3	361.496	1.21255	0.306778	18.0894	0.000118013	0.00136405	189.779	263.864	193.911	447.169	370.186	391.925	577.089	458.043	3
ENSMUSG00000040663	Clcf1	91.333	1.00129	0.460105	18.0878	0.000118112	0.0013644	49.3944	35.0151	46.4932	96.5044	164.527	174.585	75.8377	88.3074	3
ENSMUSG00000040675	Mthfd1l	142.291	1.19654	0.347899	18.0793	0.00011861	0.00136936	70.1921	78.7841	80.5126	215.941	179.217	146.081	194.289	173.314	2
ENSMUSG00000062901	Klhl24	6908.52	-0.734998	0.196055	18.0639	0.000119528	0.00137917	9269.26	8379.87	8975.46	6350.18	5390.22	6468.55	4961.23	5473.41	1
ENSMUSG00000051397	Tacstd2	16.846	1.48102	1.81122	18.0477	0.000120502	0.0013896	0	0	2.26796	66.8842	41.1318	18.7055	5.77811	0	3
ENSMUSG00000018604	Tbx3	384.049	-1.10961	0.29199	18.0311	0.000121504	0.00140035	505.643	472.704	678.121	262.759	364.31	303.742	221.013	264.097	1
ENSMUSG00000021665	Hexb	315.45	1.39912	0.343174	18.0262	0.000121807	0.00140302	230.074	170.074	235.868	278.047	260.501	228.92	455.748	664.369	2
ENSMUSG00000078515	Ddi2	3678.58	-0.71506	0.171732	18.0234	0.000121975	0.00140416	4310.31	4313.12	3865.74	4177.4	3782.17	3771.39	2689.71	2518.82	1
ENSMUSG00000020181	Nav3	564.219	0.273435	0.291957	18.0023	0.00012327	0.00141825	445.85	352.653	378.75	660.243	747.228	1032.37	442.748	453.916	3
ENSMUSG00000067591	Klra3	14.243	6.61905	1.71623	17.9928	0.000123855	0.00142416	0	0	0	7.64391	45.0491	17.8148	25.2792	18.1567	3
ENSMUSG00000025092	Hspa12a	536.187	-1.05786	0.290216	17.9867	0.000124232	0.00142767	773.413	747.823	762.035	350.664	394.669	578.09	379.911	302.886	1
ENSMUSG00000045374	Wdr81	825.763	0.805419	0.228319	17.9781	0.000124771	0.00143304	704.521	677.793	699.666	801.655	624.812	563.838	1399.02	1134.79	2
ENSMUSG00000029465	Arpc3	1025	0.965153	0.261373	17.9742	0.000125014	0.00143417	666.825	644.029	676.987	1079.7	1427.86	1058.2	1448.86	1197.51	3
ENSMUSG00000031799	Tpm4	1836.19	0.801522	0.28726	17.9746	0.000124985	0.00143417	1225.76	1046.7	1168	1876.58	3090.76	2216.16	2006.45	2059.13	3
ENSMUSG00000030451	Herc2	6461.08	-0.614223	0.191261	17.9666	0.00012549	0.00143798	8805.21	8589.97	7229.13	5685.16	5020.04	5336.42	5426.37	5596.38	1
ENSMUSG00000032376	Usp3	797.854	0.399195	0.232263	17.9666	0.000125489	0.00143798	579.735	551.489	581.732	1265.07	954.845	886.286	846.493	717.188	3
ENSMUSG00000079462	Gm15737	191.537	-1.65437	0.409861	17.9635	0.000125682	0.00143936	224.875	222.596	221.126	142.368	251.687	340.262	65.0037	64.3736	3
ENSMUSG00000063972	Nr6a1	248.649	-1.06601	0.303283	17.9569	0.000126099	0.0014433	380.857	300.13	402.563	222.629	167.465	179.929	158.176	177.44	1
ENSMUSG00000085180	AI838599	90.4992	-1.46194	0.491999	17.9537	0.000126299	0.00144477	149.483	161.32	150.819	62.1068	26.4419	68.5869	54.892	50.3435	1
ENSMUSG00000020108	Ddit4	813.464	-1.7571	0.436583	17.9397	0.000127189	0.00145412	512.142	901.64	1578.5	1200.09	626.77	1231	217.401	240.163	1
ENSMUSG00000069114	Zbtb10	569.271	-1.13447	0.278171	17.9384	0.000127267	0.00145418	861.803	725.314	752.963	603.869	390.752	515.738	331.519	372.211	1
ENSMUSG00000054027	Nt5dc3	1817.22	-0.874765	0.233441	17.9364	0.0001274	0.00145486	2417.73	2373.53	2484.55	1329.09	1535.59	1844.72	1065.34	1487.2	1
ENSMUSG00000028327	Stra6l	89.2042	5.43102	1.06398	17.9333	0.000127594	0.00145541	1.29985	5.00216	77.1107	15.2878	128.292	141.628	213.79	131.223	2
ENSMUSG00000005142	Man2b1	1343.25	1.27742	0.327786	17.9342	0.00012754	0.00145541	703.221	674.042	814.198	2201.45	1481.72	1071.56	2075.79	1724.06	2
ENSMUSG00000017309	Cd300lg	992.039	-0.78641	0.285027	17.9019	0.000129611	0.00147758	1593.62	1159.25	1484.38	579.026	664.964	950.419	710.708	793.941	1
ENSMUSG00000026972	Arrdc1	161.432	2.10376	0.479275	17.8846	0.000130742	0.00148963	67.5924	57.5249	81.6466	239.828	114.581	81.948	361.132	287.205	2
ENSMUSG00000034832	Tet3	2393.29	1.05336	0.249694	17.8739	0.000131444	0.00149677	1536.43	1533.16	1789.42	2773.78	2590.32	2037.12	3756.49	3129.55	2
ENSMUSG00000021690	Jmy	2071.88	-0.951256	0.245476	17.8726	0.000131526	0.00149685	2875.28	2809.97	2642.18	2049.52	1523.84	1772.57	1308.02	1593.66	1
ENSMUSG00000028655	Mfsd2a	58.5729	-4.47971	0.952618	17.8625	0.00013219	0.00150305	41.5953	185.08	83.9146	64.0178	18.6072	66.8054	3.61132	4.95182	1
ENSMUSG00000030681	Mvp	2027.83	1.14439	0.359095	17.8621	0.000132222	0.00150305	1138.67	1074.21	1136.25	1776.25	3383.58	2940.33	2807.44	1965.87	3
ENSMUSG00000037965	Zc3h7a	1748.92	0.981338	0.388643	17.8579	0.0001325	0.00150536	963.191	954.163	869.763	1516.36	2905.67	3319.79	2023.06	1439.33	3
ENSMUSG00000025324	Atp10a	754.694	1.60298	0.589985	17.849	0.000133086	0.00151116	241.773	267.616	227.93	381.24	1740.27	1859.86	774.989	543.874	3
ENSMUSG00000024222	Fkbp5	3095.02	-0.934151	0.412429	17.8374	0.000133865	0.00151914	1908.18	2721.18	3218.24	6914.87	3827.22	3369.67	1396.14	1404.67	3
ENSMUSG00000041235	Chd7	2673.31	-0.660202	0.259819	17.828	0.000134495	0.00152542	2448.92	2487.33	2676.19	4244.28	3352.24	2854.82	1538.42	1784.3	3
ENSMUSG00000039787	Cercam	126.632	0.939557	0.479481	17.8226	0.000134854	0.00152863	106.588	118.801	155.355	85.0385	35.2558	58.7888	201.512	251.717	2
ENSMUSG00000062585	Cnr2	147.498	2.33842	0.617622	17.8209	0.000134972	0.00152909	33.7962	37.5162	27.2155	427.104	147.879	60.5703	206.567	239.338	2
ENSMUSG00000050953	Gja1	1485.9	-1.05379	0.245646	17.8038	0.00013613	0.00154072	1819.79	2364.77	1316.55	1516.36	1626.66	1336.11	991.668	915.261	1
ENSMUSG00000034575	Papd7	913.348	1.09109	0.430887	17.8035	0.000136152	0.00154072	453.649	431.437	435.449	668.842	1720.68	1870.55	922.331	803.845	3
ENSMUSG00000026872	Zeb2	5707.31	1.39959	0.345753	17.7948	0.000136747	0.00154657	3430.31	3082.58	3429.16	4173.58	7747.47	6994.09	9754.89	7046.43	3
ENSMUSG00000026223	Itm2c	985.279	1.03635	0.257957	17.7755	0.000138073	0.00156068	621.33	614.016	750.695	958.356	1251.58	1044.84	1419.97	1221.45	2
ENSMUSG00000114019	AC154231.4	170.183	-0.563827	0.365733	17.7742	0.000138157	0.00156075	215.776	282.622	247.208	57.3293	115.561	130.048	137.952	174.964	1
ENSMUSG00000097589	Dleu2	919.559	1.02117	0.241696	17.7713	0.000138363	0.0015622	701.921	532.73	712.14	1181.94	778.566	828.388	1419.97	1200.82	2
ENSMUSG00000047747	Rnf150	1811.28	-0.410038	0.246643	17.7633	0.000138915	0.00156754	2480.12	2554.85	2043.43	1053.9	1349.51	1412.71	1586.09	2009.61	1
ENSMUSG00000022665	Ccdc80	6753.99	-1.03715	0.241968	17.7529	0.000139641	0.00157485	8698.62	7261.89	10116.2	5640.25	5916.12	8747.06	4625.38	3026.38	1
ENSMUSG00000045287	Rtn4rl1	100.413	0.25367	0.536892	17.7448	0.000140206	0.00158033	141.684	65.0281	188.241	57.3293	31.3385	23.1592	189.233	107.289	1
ENSMUSG00000034663	Bmp2k	1177.54	0.507909	0.204188	17.7418	0.000140418	0.00158182	869.602	750.325	1047.8	1344.37	1439.61	1625.6	1180.18	1162.85	3
ENSMUSG00000039697	Ncoa7	654.016	1.42237	0.612496	17.7377	0.000140705	0.00158416	256.071	170.074	183.705	364.041	1368.12	1904.4	570.588	415.127	3
ENSMUSG00000034158	Lrrc58	6543.91	-1.11596	0.270072	17.7309	0.000141185	0.00158867	8485.44	8020.97	10140.1	7784.37	4575.42	5207.26	4400.75	3736.97	1
ENSMUSG00000034829	Nxnl1	44.3927	-1.73558	0.774692	17.7295	0.000141281	0.00158868	80.5909	102.544	58.967	27.7092	3.91731	7.12591	57.7811	16.5061	1
ENSMUSG00000041471	Fam35a	326.683	-0.151975	0.237602	17.7286	0.000141345	0.00158868	401.655	380.164	441.119	215.941	227.204	236.937	377.022	333.422	1
ENSMUSG00000027994	Mcub	121.945	3.49922	0.807845	17.6632	0.000146046	0.0016406	33.7962	10.0043	24.9476	41.086	227.204	102.435	303.351	232.735	2
ENSMUSG00000021996	Esd	1436.44	0.872787	0.223828	17.6576	0.000146456	0.00164427	986.589	1032.95	1005.84	1282.27	1923.4	1532.07	1737.77	1990.63	3
ENSMUSG00000014599	Csf1	3517.15	0.31349	0.43287	17.6414	0.000147646	0.00165645	1943.28	1735.75	2116.01	2619.95	8310.58	6945.09	2233.24	2233.27	3
ENSMUSG00000038151	Prdm1	116.922	1.89384	0.59461	17.6406	0.000147706	0.00165645	35.096	37.5162	44.2253	72.6172	276.171	213.777	143.73	112.241	3
ENSMUSG00000052125	F730043M19Rik	109.788	1.95672	0.480713	17.6355	0.000148084	0.00165976	58.4934	37.5162	53.2971	96.5044	106.747	151.426	268.682	105.639	2
ENSMUSG00000049676	Catsperg1	43.0218	2.10417	0.566953	17.6335	0.000148232	0.00166048	37.6958	13.7559	15.8757	45.8635	9.79329	22.2685	138.675	60.2471	2
ENSMUSG00000078722	Gm12394	72.0819	-2.18465	0.50561	17.6292	0.00014855	0.00166311	83.1906	151.315	99.7903	66.8842	52.8837	74.8221	23.8347	23.9338	1
ENSMUSG00000001025	S100a6	1343.38	1.41769	0.329611	17.6265	0.000148749	0.00166348	817.608	671.54	952.544	1352.97	1518.94	931.713	2032.45	2469.31	2
ENSMUSG00000118202		12.3751	-3.29262	1.48992	17.6273	0.000148689	0.00166348	2.59971	11.2549	6.80389	23.8872	32.3178	20.487	0	1.65061	3
ENSMUSG00000070034	Sp110	1056.82	3.80164	1.04878	17.6241	0.000148931	0.00166457	103.988	100.043	61.235	397.483	2684.34	2800.48	1502.31	804.67	3
ENSMUSG00000034275	Igsf9b	117.915	0.624549	0.374994	17.6204	0.000149204	0.00166669	57.1936	91.2895	52.1631	203.519	185.093	122.031	109.062	122.97	3
ENSMUSG00000000567	Sox9	226.202	-0.762896	0.613462	17.6141	0.000149677	0.00167104	85.7903	152.566	125.872	786.368	289.881	199.526	72.2264	97.3857	3
ENSMUSG00000025856	Pdgfa	527.492	0.00705559	0.291375	17.5986	0.000150835	0.00168303	421.153	386.417	354.936	612.469	971.494	654.693	416.024	402.748	3
ENSMUSG00000030201	Lrp6	3448.76	-0.575096	0.202769	17.595	0.000151111	0.00168517	4450.7	4605.74	4252.43	2860.73	2594.24	2837.9	2713.55	3274.8	1
ENSMUSG00000103883	Gm37010	24.1065	6.42206	1.47162	17.5861	0.000151787	0.00169177	0	0	4.53592	9.55489	32.3178	16.0333	69.3373	61.0724	2
ENSMUSG00000070501	Ifi214	411.695	6.32032	1.57983	17.5813	0.00015215	0.00169486	7.79912	2.50108	2.26796	57.3293	1427.86	1118.77	437.692	239.338	3
ENSMUSG00000027995	Tlr2	791.154	0.724483	0.607125	17.5727	0.000152804	0.0017012	265.17	245.106	326.587	420.415	2677.48	1554.34	451.415	388.718	3
ENSMUSG00000020048	Hsp90b1	5006.85	1.00042	0.256193	17.5601	0.00015377	0.001711	3260.03	3312.68	3530.08	4394.29	6715.26	5641.94	7007.4	6193.07	3
ENSMUSG00000024019	Cmtr1	105.607	0.601724	0.471736	17.5402	0.000155311	0.00172719	59.7933	56.2743	45.3592	118.481	180.196	228.029	87.3939	69.3254	3
ENSMUSG00000058914	C1qtnf3	46.0356	1.15149	0.533645	17.5383	0.000155453	0.00172781	24.6972	72.5314	31.7515	11.4659	21.5452	20.487	62.837	122.97	2
ENSMUSG00000020189	Osbpl8	2181.57	1.26193	0.311335	17.53	0.000156101	0.00173405	1557.22	1470.64	1568.3	1334.82	2313.17	2127.98	3898.06	3182.37	2
ENSMUSG00000033450	Tagap	262.726	1.92719	0.79641	17.5128	0.000157452	0.00174807	61.0931	35.0151	47.6272	87.905	687.489	864.908	190.678	127.097	3
ENSMUSG00000024228	Nudt12	230.586	-1.14288	0.421381	17.5037	0.000158172	0.0017551	292.467	497.715	315.247	149.056	100.871	155.879	184.9	148.554	1
ENSMUSG00000034377	Tulp4	3296.66	-0.232522	0.180448	17.4809	0.000159984	0.00177323	4003.55	4134.29	3790.9	2501.47	2528.63	2589.38	3171.46	3653.61	1
ENSMUSG00000049488	Tmem67	225.362	1.17371	0.609709	17.4816	0.000159927	0.00177323	76.6914	78.7841	80.5126	146.19	532.755	577.199	199.345	111.416	3
ENSMUSG00000059013	Sh2d3c	555.071	0.446264	0.449455	17.4717	0.000160716	0.00178035	259.971	258.862	352.668	1455.21	722.745	560.275	395.078	435.76	3
ENSMUSG00000044258	Ctla2a	260.321	0.859394	0.359362	17.469	0.000160938	0.00178183	158.582	118.801	162.159	516.92	293.799	298.398	260.737	273.175	3
ENSMUSG00000016256	Ctsz	2197.71	1.6149	0.382995	17.4675	0.00016106	0.00178219	1198.46	1278.05	1239.44	1360.62	3012.41	1891.93	4439.03	3161.73	2
ENSMUSG00000029291	Rufy3	822.307	1.44737	0.377834	17.4647	0.000161284	0.0017827	438.051	497.715	409.367	568.516	1047.88	1348.58	1206.18	1062.16	3
ENSMUSG00000058163	Gm5431	410.725	5.5535	1.28812	17.4653	0.000161235	0.0017827	20.7977	5.00216	22.6796	93.6379	1029.27	875.597	769.211	469.597	3
ENSMUSG00000026042	Col5a2	3016.7	1.06767	0.268318	17.4537	0.00016217	0.00179148	2105.76	2337.26	2411.98	3126.36	2099.68	2641.93	4329.25	5081.39	2
ENSMUSG00000021270	Hsp90aa1	2855.94	0.180103	0.174277	17.4515	0.000162348	0.00179148	2308.54	2476.07	2133.02	3351.86	3885	3298.41	2657.93	2736.7	3
ENSMUSG00000075705	Msrb1	1792.63	0.389163	0.276022	17.4521	0.000162302	0.00179148	1037.28	1218.03	1503.66	2545.42	2714.7	2099.47	1668.43	1554.04	3
ENSMUSG00000036594	H2-Aa	1079.3	1.25928	0.315562	17.4464	0.000162769	0.00179513	850.104	586.504	870.897	791.145	1081.18	826.606	1984.78	1643.18	2
ENSMUSG00000028497	Hacd4	290.59	1.89697	0.452434	17.4383	0.000163424	0.00180037	139.084	105.045	108.862	582.848	223.287	163.896	499.084	502.609	2
ENSMUSG00000019943	Atp2b1	3880.98	0.948256	0.232123	17.4394	0.000163334	0.00180037	3091.05	2757.44	3077.62	3011.7	4141.58	3587.9	5729.72	5650.85	2
ENSMUSG00000030697	Ppp4c	852.906	0.81721	0.238845	17.4345	0.00016374	0.00180285	596.633	542.735	593.072	1026.2	1090.97	877.378	1174.4	921.863	3
ENSMUSG00000043931	Gimap7	22.1594	4.85596	1.27986	17.4287	0.000164209	0.00180703	0	5.00216	0	19.1098	50.9251	19.5963	51.2807	31.3615	3
ENSMUSG00000043157	Arl11	81.5245	3.65757	0.791921	17.4197	0.000164954	0.00181422	20.7977	5.00216	9.07185	210.208	48.9664	16.0333	170.454	171.663	2
ENSMUSG00000087382	Ctcflos	481.706	-2.32469	0.550075	17.4168	0.000165189	0.00181481	781.212	812.852	740.49	407.038	183.134	570.073	296.128	62.723	1
ENSMUSG00000026821	Ralgds	1054.34	0.355328	0.308663	17.4174	0.000165143	0.00181481	792.911	714.059	601.01	1235.45	1799.03	1408.26	1105.79	778.26	3
ENSMUSG00000079457	Gm7609	21.3646	6.57033	1.72266	17.414	0.000165423	0.00181638	0	1.25054	0	3.82196	62.677	46.3184	35.3909	21.4579	3
ENSMUSG00000042717	Ppp1r3a	13722.5	-0.690305	0.271888	17.4103	0.000165729	0.00181874	19336.6	18423	18942	6923.47	11401.3	12194.2	10078.5	12481.1	1
ENSMUSG00000030096	Slc6a6	4615.86	0.837837	0.225172	17.3819	0.000168097	0.00184371	4132.23	3504.02	3975.74	3373.83	4238.53	4167.77	7111.41	6423.33	2
ENSMUSG00000086938	4930481A15Rik	123.769	-1.74162	0.402207	17.3575	0.000170161	0.00186533	210.576	151.315	161.025	135.679	108.705	116.687	42.6136	63.5483	1
ENSMUSG00000112734	AC153524.4	175.166	-1.30604	0.450373	17.3519	0.000170644	0.0018696	301.566	278.871	274.423	72.6172	78.3463	193.29	98.2279	103.988	1
ENSMUSG00000113542	AC122886.1	24.5825	3.44439	1.27027	17.3397	0.000171688	0.00188001	2.59971	2.50108	0	16.2433	62.677	78.3851	20.2234	14.0301	3
ENSMUSG00000046711	Hmga1	652.354	1.46564	0.421435	17.3356	0.000172039	0.00188281	357.46	255.11	317.515	467.234	1156.59	991.393	764.877	908.658	3
ENSMUSG00000111118	AC151730.1	650.515	7.65434	1.65584	17.3294	0.000172569	0.00188758	7.79912	2.50108	6.80389	28.6647	1630.58	1607.78	1316.69	603.296	3
ENSMUSG00000032656	March3	242.272	-0.999148	0.320606	17.3249	0.000172956	0.00189078	206.677	281.372	251.744	352.575	281.067	318.885	133.619	112.241	3
ENSMUSG00000019933	Mrln	404.057	-1.38159	0.329597	17.3234	0.000173087	0.00189118	549.838	616.517	511.425	269.448	442.657	421.32	228.958	192.296	1
ENSMUSG00000017466	Timp2	3415.73	-0.454703	0.312132	17.313	0.000173996	0.00190006	5153.92	4068.01	4780.86	2932.4	1665.84	1912.42	3023.4	3788.96	1
ENSMUSG00000053560	Ier2	583.68	-0.462718	0.299137	17.3072	0.000174496	0.00190449	457.548	427.685	635.029	742.415	961.701	742.877	342.353	359.832	3
ENSMUSG00000027959	Sass6	160.529	1.84823	0.531822	17.3004	0.000175089	0.00190992	76.6914	58.7754	47.6272	111.792	295.757	251.188	236.903	205.5	3
ENSMUSG00000062908	Acadm	7909.99	-1.2339	0.319524	17.2909	0.000175929	0.00191803	10729	12487.9	10548.3	4409.58	6964.99	9236.08	4640.54	4263.51	1
ENSMUSG00000056708	Ier5	1617.14	0.95288	0.35237	17.2885	0.000176139	0.00191927	969.691	805.348	1006.98	1473.36	2808.71	2454.88	1916.89	1501.23	3
ENSMUSG00000106867	Gm43800	108.441	-1.13221	0.418469	17.2763	0.000177216	0.00192995	187.179	162.57	167.829	76.4391	40.1525	85.511	74.3932	73.4519	1
ENSMUSG00000033470	Cysltr2	12.5586	6.4891	1.73176	17.2741	0.000177408	0.00193099	0	0	0	5.73293	34.2765	26.7222	18.0566	15.6807	3
ENSMUSG00000032446	Eomes	28.9835	6.35828	1.6067	17.2715	0.000177644	0.00193251	0	2.50108	0	6.68842	109.685	31.1759	57.0588	24.7591	3
ENSMUSG00000036273	Lrrk2	897.92	0.242146	0.264028	17.2646	0.000178258	0.00193768	707.12	563.994	681.523	1525.92	1085.1	1062.65	748.265	808.797	3
ENSMUSG00000000555	Itga5	2140.44	0.71374	0.383772	17.2639	0.000178314	0.00193768	1138.67	1072.96	1248.51	2016.08	5166.94	2553.75	1858.38	2068.21	3
ENSMUSG00000026819	Slc25a25	2489.23	-0.830898	0.315845	17.2573	0.000178905	0.00194305	2998.76	3796.64	3900.89	963.133	1823.51	2783.56	1258.91	2388.43	1
ENSMUSG00000003484	Cyp4f18	203.872	2.30201	0.824908	17.2519	0.00017939	0.00194725	15.5982	26.2614	45.3592	864.718	242.874	110.452	152.398	173.314	3
ENSMUSG00000044813	Shb	347.847	-0.759497	0.359912	17.25	0.00017956	0.00194805	256.071	312.635	345.864	451.946	640.481	415.085	208.012	152.681	3
ENSMUSG00000015133	Lrrk1	764.931	1.40205	0.342865	17.2392	0.000180529	0.00195749	521.241	452.696	451.324	519.786	849.078	895.193	1373.75	1056.39	2
ENSMUSG00000026525	Opn3	61.3885	-1.0855	0.507761	17.2375	0.000180683	0.0019581	88.39	96.2916	127.006	39.1751	20.5659	26.7222	42.6136	50.3435	1
ENSMUSG00000022840	Adcy5	986.104	-1.16579	0.371696	17.2274	0.000181599	0.00196696	1398.64	1110.48	2008.28	1100.72	361.372	617.282	829.881	462.169	1
ENSMUSG00000046245	Pilra	88.5242	1.67017	0.694769	17.2151	0.000182718	0.00197801	22.0975	12.5054	38.5554	255.116	150.817	73.9314	86.6717	68.5001	3
ENSMUSG00000015501	Hivep2	3333.36	-0.875114	0.257897	17.206	0.000183552	0.00198597	4537.79	4788.32	4294.39	1984.55	2938.97	3319.79	2170.4	2632.72	1
ENSMUSG00000034459	Ifit1	7344.51	3.80219	1.28888	17.1925	0.000184798	0.00199836	236.573	235.102	178.035	1416.99	22611.7	28914.3	3422.81	1740.56	3
ENSMUSG00000032387	Rbpms2	172.967	-2.35729	0.573933	17.1856	0.000185432	0.00200413	223.575	426.434	255.146	118.481	106.747	127.376	94.6166	31.3615	1
ENSMUSG00000022228	Zscan26	718.672	-0.729243	0.195513	17.1669	0.000187179	0.00202192	928.095	894.137	918.525	666.931	602.287	638.66	579.978	520.766	1
ENSMUSG00000037966	Ninj1	555.636	1.09062	0.317476	17.1625	0.000187592	0.00202528	296.367	262.614	460.396	626.801	798.153	674.29	588.645	737.821	3
ENSMUSG00000112129	Pbld1	54.362	-1.39654	0.500413	17.1408	0.000189632	0.0020451	72.7918	55.0238	167.829	27.7092	18.6072	41.8647	23.8347	27.235	1
ENSMUSG00000118640		41.2407	4.50395	1.1541	17.1419	0.000189533	0.0020451	0	7.50325	6.80389	11.4659	87.1602	138.065	48.3917	30.5362	3
ENSMUSG00000041057	Wdr43	1271.66	-0.321534	0.21046	17.1389	0.00018982	0.00204601	1164.67	1158	1094.29	1449.48	1917.53	1504.46	857.327	1027.5	3
ENSMUSG00000052477	C130026I21Rik	119.581	2.91375	0.976193	17.1141	0.000192181	0.00207035	25.9971	5.00216	17.0097	45.8635	312.406	329.574	170.454	50.3435	3
ENSMUSG00000052477	C130026I21Rik	119.581	2.91375	0.976193	17.1141	0.000192181	0.00207035	25.9971	5.00216	17.0097	45.8635	312.406	329.574	170.454	50.3435	3
ENSMUSG00000015342	Xk	211.816	-0.689395	0.282959	17.1018	0.000193371	0.00208205	267.77	300.13	322.051	128.991	148.858	176.366	141.564	208.802	1
ENSMUSG00000025010	Ccnj	208.86	0.329325	0.337545	17.098	0.000193736	0.00208486	122.186	163.821	122.47	203.519	356.476	371.438	144.453	186.518	3
ENSMUSG00000033161	Atp1a1	3771.62	0.919798	0.26335	17.0915	0.000194373	0.00209058	2551.61	2035.88	2965.36	3911.77	5162.04	4442.12	4643.43	4460.76	3
ENSMUSG00000028854	Slc9a1	843.549	0.677763	0.251778	17.0836	0.000195141	0.00209771	595.333	572.748	566.99	879.05	1149.73	1172.21	966.389	845.935	3
ENSMUSG00000037580	Gch1	556.451	0.711067	0.513812	17.082	0.000195292	0.0020982	239.173	216.344	291.433	354.486	1390.65	1242.58	377.744	339.199	3
ENSMUSG00000035992	Fnip1	2946.61	-0.583604	0.264972	17.0687	0.000196598	0.0021111	4329.81	3436.49	4379.43	1624.33	2006.64	2901.14	2573.43	2321.58	1
ENSMUSG00000103199	Gm37648	46.6727	2.37076	0.674449	17.0662	0.000196841	0.00211258	20.7977	15.0065	4.53592	52.5519	68.553	57.8981	94.6166	59.4218	3
ENSMUSG00000034709	Ppp1r21	380.101	1.11323	0.272272	17.064	0.000197065	0.00211384	257.371	280.121	257.414	369.774	380.959	269.894	678.928	546.35	2
ENSMUSG00000074264	Amy1	1336.24	-1.53681	0.362408	17.0629	0.000197174	0.00211387	1817.2	1877.06	1969.72	1016.64	1140.92	1616.69	852.271	399.446	1
ENSMUSG00000022404	Slc25a17	500.099	-0.751212	0.247939	17.0535	0.000198096	0.00212262	672.024	726.564	621.422	426.148	337.868	407.068	433.358	376.338	1
ENSMUSG00000043631	Ecm2	384.562	-0.00421921	0.313	17.0521	0.000198241	0.00212304	475.746	500.216	476.272	159.567	241.894	317.994	408.801	496.007	2
ENSMUSG00000025085	Ablim1	2967.78	-0.322589	0.186895	17.0463	0.000198812	0.00212802	3266.53	3292.67	4762.72	2237.76	1980.2	2914.5	2532.98	2754.86	1
ENSMUSG00000058569	Tmed9	1193.99	0.723532	0.188067	17.0388	0.000199563	0.00213491	846.205	942.908	909.453	1293.73	1336.78	1222.09	1423.58	1577.15	2
ENSMUSG00000030872	Gga2	638.922	0.384489	0.218172	17.0188	0.000201565	0.00215517	635.628	656.534	682.657	523.608	439.719	444.479	904.274	824.477	2
ENSMUSG00000114871	AC238811.3	28.5439	5.41313	1.26427	17.0165	0.000201795	0.00215647	0	1.25054	10.2058	8.5994	58.7597	52.5536	54.892	42.0904	3
ENSMUSG00000027583	Zbtb46	447.947	-0.78606	0.231158	17.0078	0.000202674	0.00216471	679.823	542.735	559.053	377.418	359.414	369.657	348.853	346.627	1
ENSMUSG00000035095	Fam167a	65.2785	-1.14618	0.641813	17.0064	0.00020282	0.00216483	124.786	105.045	111.13	11.4659	43.0905	14.2518	62.1147	50.3435	1
ENSMUSG00000032175	Tyk2	694.733	1.39686	0.347908	17.0047	0.00020299	0.00216483	448.449	363.907	410.501	536.985	910.776	764.254	1224.24	898.755	2
ENSMUSG00000015652	Steap1	27.937	2.48057	0.913328	17.0045	0.00020301	0.00216483	2.59971	10.0043	2.26796	47.7745	60.7184	40.0833	41.8913	18.1567	3
ENSMUSG00000063904	4930533O14Rik	662.341	1.01989	0.250005	16.9968	0.000203794	0.00217203	436.751	531.48	471.736	695.596	617.956	491.688	988.057	1065.47	2
ENSMUSG00000022197	Pdzd2	3556.07	-0.552935	0.244725	16.9858	0.000204922	0.00218288	3592.8	3116.35	3284.01	4503.22	3611.76	6032.98	2468.7	1838.77	3
ENSMUSG00000021708	Rasgrf2	271.836	-0.23695	0.374363	16.984	0.000205099	0.0021836	473.147	297.629	357.204	108.926	143.961	194.181	314.907	284.729	1
ENSMUSG00000027247	Arhgap1	571.402	0.932839	0.230959	16.9745	0.000206077	0.00219285	426.352	385.167	376.482	708.973	588.577	472.983	826.992	785.688	2
ENSMUSG00000027496	Aurka	157.96	0.032931	0.382574	16.9646	0.000207104	0.0022026	102.688	121.302	80.5126	166.255	379.98	183.492	104.006	125.446	3
ENSMUSG00000028347	Tmeff1	123.044	-1.32123	0.451343	16.963	0.000207269	0.00220318	220.975	178.827	193.911	115.614	35.2558	82.8388	91.7275	65.1989	1
ENSMUSG00000001020	S100a4	64.342	3.41387	0.793427	16.9575	0.000207842	0.0022081	11.6987	12.5054	21.5456	14.3323	121.437	51.6629	132.174	149.38	2
ENSMUSG00000025766	D3Ertd751e	170.884	-1.05121	0.364401	16.953	0.000208308	0.00221187	243.073	278.871	256.28	101.282	95.9742	156.77	135.786	99.0363	1
ENSMUSG00000062198	2700097O09Rik	304.043	-0.724799	0.277439	16.9493	0.000208697	0.00221483	461.448	323.89	508.023	209.252	179.217	293.053	223.902	233.561	1
ENSMUSG00000084940	Gm15935	123.475	-1.45467	0.420727	16.9387	0.000209798	0.00222533	144.284	135.058	111.13	220.718	138.085	136.283	41.169	61.0724	3
ENSMUSG00000048486	Fitm2	3180.67	-0.812579	0.282104	16.9332	0.000210382	0.00223034	4478	4055.5	4906.74	1640.57	2330.8	3490.81	2252.74	2290.21	1
ENSMUSG00000047412	Zbtb44	2596.76	-0.895569	0.237537	16.9248	0.000211264	0.00223731	3497.91	3637.82	3135.46	2330.44	2090.87	2339.08	1586.81	2155.69	1
ENSMUSG00000110144	Gm45564	12.6579	3.81288	1.4872	16.925	0.000211244	0.00223731	0	0	3.40194	15.2878	24.4832	43.6462	8.66717	5.77712	3
ENSMUSG00000037035	Inhbb	552.497	-0.108994	0.483935	16.9154	0.000212259	0.00224666	337.962	321.389	310.711	514.053	1021.44	1357.49	371.244	185.693	3
ENSMUSG00000024935	Slc1a1	87.4362	-1.77186	0.419725	16.9133	0.000212478	0.00224778	123.486	102.544	127.006	79.3056	110.664	88.1832	36.1132	32.1868	1
ENSMUSG00000097006	9530082P21Rik	216.208	2.37712	0.610602	16.9064	0.000213221	0.00225446	70.1921	86.2873	61.235	131.857	289.881	375.001	517.141	198.073	3
ENSMUSG00000032265	Fam46a	1603.43	1.66068	0.534929	16.9018	0.000213712	0.00225845	649.927	552.739	675.853	904.848	2937.99	3657.38	2182.68	1266.01	3
ENSMUSG00000030168	Adipor2	7775.99	-0.914154	0.254072	16.8757	0.00021652	0.00228691	10341.6	11089.8	9763.58	7545.5	5485.22	6449.84	7089.74	4442.6	1
ENSMUSG00000042473	Tbc1d8b	265.744	0.775407	0.258226	16.8655	0.000217623	0.00229735	248.272	221.346	242.672	217.852	189.01	193.29	395.078	418.428	2
ENSMUSG00000021451	Sema4d	2396.4	1.05535	0.364172	16.8614	0.000218065	0.0023008	1212.76	1409.36	1319.95	1912.89	4801.65	3169.25	2812.5	2532.85	3
ENSMUSG00000023034	Nr4a1	4622.78	-1.23208	0.338387	16.8563	0.000218627	0.00230551	7354.57	6032.61	6782.34	2651.48	3255.29	5674.9	2127.07	3103.96	1
ENSMUSG00000022347	A1bg	179.377	-1.94615	0.683114	16.8538	0.000218902	0.0023072	76.6914	136.309	1031.92	35.3531	30.3592	47.2092	31.7796	45.3916	1
ENSMUSG00000002885	Adgre5	1586.4	0.73256	0.259515	16.8527	0.000219023	0.00230725	1054.18	947.91	1195.22	1708.41	2419.92	1871.44	1708.15	1785.95	3
ENSMUSG00000032418	Me1	4582.33	-1.20847	0.333316	16.8461	0.000219745	0.00231364	5621.87	9979.32	4611.9	3072.85	3501.1	3987.84	2700.54	3183.19	1
ENSMUSG00000021365	Nedd9	588.438	0.234285	0.294561	16.8158	0.000223101	0.00234774	439.35	317.637	517.095	952.623	768.773	763.364	460.082	488.579	3
ENSMUSG00000040520	Manea	325.734	0.0624111	0.252856	16.8102	0.000223723	0.00235304	349.661	387.668	415.037	215.941	234.06	210.214	415.302	377.989	1
ENSMUSG00000004814	Ccl24	88.3175	-3.11152	0.699859	16.8004	0.000224818	0.00236331	162.482	123.804	176.901	61.1513	115.561	19.5963	17.3343	29.7109	1
ENSMUSG00000036180	Gatad2a	1546.59	0.586301	0.216114	16.7988	0.000224998	0.00236396	1065.88	1150.5	1154.39	1606.18	2166.27	1895.49	1690.82	1643.18	3
ENSMUSG00000057789	Bak1	513.059	1.26538	0.324702	16.7952	0.000225406	0.00236699	298.966	340.147	275.557	461.501	696.303	517.52	884.773	629.706	2
ENSMUSG00000032527	Pccb	1948.52	-1.13839	0.275375	16.7867	0.000226366	0.00237583	2343.64	3122.6	2148.89	1507.76	1923.4	2279.4	1079.78	1182.66	1
ENSMUSG00000034898	Filip1	2835.83	-0.899176	0.224745	16.7786	0.000227283	0.0023842	3626.59	3859.17	3387.2	2501.47	2692.17	2616.1	1599.81	2404.11	1
ENSMUSG00000051984	Sec31b	1030.5	-0.901298	0.22908	16.7591	0.00022951	0.0024063	1292.05	1384.35	1322.22	733.816	1078.24	1032.37	650.76	750.2	1
ENSMUSG00000049112	Oxtr	576.044	-2.19475	0.651754	16.7425	0.000231425	0.0024251	1094.48	911.644	1106.77	663.109	185.093	71.2591	278.072	297.934	1
ENSMUSG00000033386	Frrs1	333.659	0.973203	0.260996	16.7389	0.000231848	0.00242826	230.074	211.341	200.715	473.923	353.538	289.49	498.362	411.826	2
ENSMUSG00000033294	Noc4l	436.345	0.127554	0.24381	16.7328	0.000232554	0.00243438	341.861	377.663	282.361	531.252	622.853	582.544	367.632	384.591	3
ENSMUSG00000040010	Slc7a5	474.647	0.405348	0.585138	16.7133	0.000234824	0.00245686	136.485	277.62	170.097	1599.49	565.073	423.101	244.847	380.464	3
ENSMUSG00000020377	Ltc4s	43.0474	0.324328	0.569496	16.6947	0.000237019	0.00247853	48.0946	40.0173	82.7806	23.8872	7.83463	16.924	79.449	45.3916	1
ENSMUSG00000083863	Gm13341	825.234	-1.14458	0.371002	16.6779	0.000239024	0.00249818	1398.64	1107.98	1242.84	407.038	510.23	897.865	411.69	625.579	1
ENSMUSG00000078249	Hmga1-rs1	197.741	1.52485	0.443652	16.6736	0.000239542	0.00250229	88.39	77.5335	117.934	141.412	360.393	309.087	241.236	245.94	3
ENSMUSG00000060591	Ifitm2	769.505	0.677669	0.314074	16.6689	0.000240106	0.00250686	521.241	440.19	492.148	760.569	1300.55	1119.66	782.212	739.471	3
ENSMUSG00000079339	Ifit1bl1	1350.3	7.46126	1.78393	16.6496	0.000242433	0.00252984	16.8981	2.50108	2.26796	121.347	3900.67	4218.54	1984.78	555.429	3
ENSMUSG00000034636	Zyg11b	3200.78	-0.394297	0.185128	16.6459	0.000242879	0.00253317	3869.66	4139.29	3922.44	2310.37	2622.64	2750.6	2681.77	3309.46	1
ENSMUSG00000002147	Stat6	1706.33	0.94167	0.25668	16.6394	0.000243665	0.00253739	1125.67	1022.94	1215.63	2164.18	2096.74	1553.45	2483.87	1988.15	2
ENSMUSG00000035539	Ccdc180	12.8287	5.48942	1.50262	16.6402	0.000243575	0.00253739	0	0	2.26796	11.4659	22.5246	18.7055	24.557	23.1085	3
ENSMUSG00000031278	Acsl4	1681.78	0.159995	0.296989	16.641	0.000243476	0.00253739	1197.17	1271.8	1131.71	1661.6	2648.1	2979.52	1312.35	1251.98	3
ENSMUSG00000079455	Gm16026	42.6881	4.30827	1.17373	16.6372	0.000243939	0.00253892	3.89956	3.75162	2.26796	7.64391	94.9949	123.813	67.1705	37.9639	3
ENSMUSG00000028444	Cntfr	295.894	-1.32793	0.325408	16.6212	0.000245901	0.00255734	388.656	500.216	311.845	177.721	378.021	271.675	134.341	204.675	1
ENSMUSG00000027398	Il1b	1127.62	-0.136533	0.597244	16.6206	0.000245965	0.00255734	444.55	390.169	640.699	478.7	3353.22	2950.13	340.909	422.555	3
ENSMUSG00000051747	Ttn	2.32718e+06	-1.12172	0.281415	16.6045	0.000247963	0.00257678	2.8293e+06	4.12152e+06	2.42961e+06	1.78049e+06	2.12069e+06	2.36166e+06	1.10865e+06	1.86556e+06	1
ENSMUSG00000047180	Neurl3	358.309	1.9985	0.601124	16.5916	0.000249565	0.00259207	83.1906	76.283	120.202	1202.96	288.902	234.264	515.696	344.976	2
ENSMUSG00000031862	Atp13a1	947.8	0.595654	0.260382	16.5894	0.000249832	0.0025935	591.433	749.074	611.216	1077.79	1342.66	1241.69	1086.28	882.248	3
ENSMUSG00000079071	Gm14085	99.9194	1.90582	0.531597	16.586	0.000250263	0.00259662	37.6958	46.27	32.8854	76.4391	189.99	122.031	171.899	122.145	3
ENSMUSG00000022285	Ywhaz	3133.33	0.639815	0.242231	16.5638	0.000253057	0.00262425	2131.76	2079.65	2351.88	3261.08	4713.51	3804.35	3437.25	3287.18	3
ENSMUSG00000005667	Mthfd2	193.327	1.49424	0.368868	16.5547	0.000254205	0.00263479	79.2911	106.296	142.882	216.896	231.122	180.82	265.793	323.519	2
ENSMUSG00000090252	Gm16028	15.4076	4.27515	1.25694	16.5498	0.000254829	0.00263988	0	2.50108	2.26796	6.68842	26.4419	52.5536	13.0007	19.8073	3
ENSMUSG00000102504	Gm21955	78.0866	-1.43227	0.430731	16.5404	0.000256039	0.00265105	113.087	155.067	103.192	38.2196	58.7597	64.1332	36.1132	56.1206	1
ENSMUSG00000053964	Lgals4	155.508	-1.36105	0.374184	16.533	0.000256978	0.00265664	252.172	205.089	239.27	152.878	69.5323	154.989	97.5056	72.6266	1
ENSMUSG00000029616	Erp29	791.213	1.02726	0.253691	16.5348	0.00025675	0.00265664	590.134	526.478	547.713	725.216	900.003	722.39	1287.8	1029.98	2
ENSMUSG00000026970	Rbms1	2306.74	0.836205	0.279042	16.5337	0.000256895	0.00265664	1541.63	1303.06	1703.24	2157.49	3426.67	3202.21	2590.04	2529.55	3
ENSMUSG00000021884	Hacl1	43.3069	-1.26684	0.654258	16.5243	0.0002581	0.00266685	71.4919	48.7711	117.934	23.8872	10.7726	8.90739	44.0581	20.6326	1
ENSMUSG00000037410	Tbc1d2b	810.082	1.01397	0.249091	16.5159	0.000259191	0.00267675	558.937	558.992	553.383	1012.82	767.794	641.332	1239.4	1148	2
ENSMUSG00000099241	Gm18852	88.3182	2.45076	0.785065	16.5056	0.000260523	0.00268911	14.2984	27.5119	17.0097	42.0415	185.093	253.861	109.784	56.9459	3
ENSMUSG00000052336	Cx3cr1	43.8643	2.15402	0.558338	16.5026	0.000260914	0.00269175	11.6987	23.7603	7.93787	60.1958	63.6564	21.3777	71.5041	90.7833	2
ENSMUSG00000107655	Gm44220	67.6798	-1.78261	0.431437	16.4997	0.000261298	0.00269433	113.087	80.0346	104.326	72.6172	52.8837	59.6795	39.0022	19.8073	1
ENSMUSG00000097124	A530020G20Rik	175.539	-1.35874	0.583048	16.4919	0.000262318	0.00270344	309.365	297.629	206.385	202.564	33.2972	32.9574	235.458	86.6568	1
ENSMUSG00000020644	Id2	283.296	1.61121	0.497722	16.4805	0.000263817	0.00271749	75.3915	117.551	137.212	400.35	608.163	211.996	374.855	340.85	3
ENSMUSG00000026358	Rgs1	116.359	2.89356	0.713417	16.4714	0.000265017	0.00272844	31.1965	35.0151	31.7515	21.0208	207.618	133.611	183.455	287.205	2
ENSMUSG00000072235	Tuba1a	648.443	0.783093	0.221931	16.4662	0.000265705	0.00273412	596.633	528.979	531.837	503.543	560.176	570.073	985.168	911.134	2
ENSMUSG00000021127	Zfp36l1	2522.35	-0.545471	0.177816	16.4601	0.000266526	0.00274116	2656.9	2504.83	2648.98	2790.03	2919.38	3167.47	1722.6	1768.62	3
ENSMUSG00000027219	Slc28a2	762.754	2.11107	0.55055	16.458	0.000266804	0.0027426	350.96	258.862	265.352	388.884	1383.79	929.932	1570.2	954.05	3
ENSMUSG00000006498	Ptbp1	1184.9	0.606238	0.228058	16.4507	0.000267773	0.00275115	834.506	804.098	857.29	1728.48	1400.44	1217.64	1440.92	1195.86	2
ENSMUSG00000004187	Kifc2	92.0225	-1.12913	0.402942	16.4423	0.0002689	0.00276131	136.485	172.575	112.264	75.4836	51.9044	43.6462	79.449	64.3736	1
ENSMUSG00000037872	Ackr1	216.454	-0.454366	0.392807	16.4373	0.000269576	0.00276683	157.282	165.071	171.231	211.163	370.186	437.353	122.785	96.5604	3
ENSMUSG00000045932	Ifit2	9317.45	5.82313	1.4832	16.4323	0.000270257	0.00277239	131.285	163.821	195.045	843.697	26937.4	33283.4	10189.7	2795.3	3
ENSMUSG00000114370	AC022682.1	97.37	3.40531	0.781172	16.4213	0.000271749	0.00278626	6.49927	30.013	28.3495	94.5934	53.8631	35.6296	374.855	155.157	2
ENSMUSG00000057137	Tmem140	1092.29	-1.13569	0.337819	16.4029	0.000274256	0.00281052	1368.75	1022.94	979.76	1632.93	841.243	1846.5	713.597	332.597	3
ENSMUSG00000102196	Gm38171	18.8666	1.85618	1.2242	16.3991	0.000274773	0.00281438	2.59971	0	6.80389	48.7299	30.3592	48.0999	3.61132	10.7289	3
ENSMUSG00000045005	Fzd5	256.051	0.481457	0.281386	16.3921	0.00027574	0.00282284	152.083	156.318	237.002	257.982	359.414	452.496	215.235	217.88	3
ENSMUSG00000044349	Snhg11	92.6948	-1.52775	0.525355	16.3865	0.000276515	0.00282933	166.381	157.568	133.81	76.4391	27.4212	53.4444	96.7834	29.7109	1
ENSMUSG00000056888	Glipr1	66.7175	2.25166	0.766741	16.3838	0.000276883	0.00283164	11.6987	10.0043	17.0097	213.074	96.9535	40.974	60.6702	83.3556	2
ENSMUSG00000027454	Gins1	49.983	1.28378	0.567893	16.3814	0.000277214	0.00283357	29.8966	17.5076	13.6078	74.5281	70.5117	93.5276	60.6702	39.6145	3
ENSMUSG00000028957	Per3	1378.27	-0.268323	0.313916	16.3665	0.000279294	0.00285338	1891.29	1982.11	1628.4	772.991	667.902	1188.25	1417.08	1478.12	1
ENSMUSG00000018841	Rad51d	267.97	-0.324011	0.377879	16.3567	0.000280671	0.00286597	321.064	423.933	324.319	203.519	116.54	122.031	392.189	240.163	1
ENSMUSG00000066278	Vps37b	158.618	0.691954	0.396094	16.3478	0.000281919	0.00287724	71.4919	98.7927	103.192	211.163	279.109	217.34	169.01	118.844	3
ENSMUSG00000114980		9.80289	3.65743	1.65168	16.3299	0.000284456	0.00290166	1.29985	0	0	12.4214	22.5246	32.0666	4.33358	5.77712	3
ENSMUSG00000047888	Tnrc6b	5062.64	-0.417676	0.218292	16.3186	0.000286069	0.00291662	6728.04	6447.79	6184.73	4280.59	3187.71	4079.59	4696.16	4896.52	1
ENSMUSG00000027429	Sec23b	638.17	0.949744	0.344024	16.3122	0.000286975	0.00292436	298.966	422.683	398.027	682.219	1128.19	756.238	807.491	611.549	3
ENSMUSG00000022240	Ctnnd2	44.1817	2.96162	0.736613	16.3015	0.000288513	0.00293854	10.3988	5.00216	11.3398	106.059	38.1938	23.1592	98.2279	61.0724	2
ENSMUSG00000063873	Slc24a3	688.077	-2.06088	0.515124	16.2873	0.000290571	0.00294784	1113.97	1295.56	936.668	433.792	457.346	692.995	446.359	127.922	1
ENSMUSG00000037071	Scd1	124380	-2.11866	0.509647	16.288	0.000290469	0.00294784	208452	222274	141935	109758	59125	153630	77522	22347.5	1
ENSMUSG00000028692	Akr1a1	3995.36	1.02934	0.257161	16.2872	0.000290593	0.00294784	2803.78	2940.02	3070.82	2934.31	4513.73	4125.01	6152.97	5422.24	2
ENSMUSG00000004451	Ralb	737.714	0.942091	0.264731	16.2926	0.000289803	0.00294784	516.042	435.188	487.612	830.32	1011.65	692.104	1000.34	928.465	3
ENSMUSG00000040026	Saa3	1852.1	4.04041	1.09011	16.2936	0.000289665	0.00294784	187.179	152.566	130.408	658.332	5638.97	2870.85	3692.93	1485.54	3
ENSMUSG00000020806	Rhbdf2	1093.72	-0.0818305	0.312563	16.2886	0.00029039	0.00294784	869.602	730.316	876.567	1120.79	1915.57	1737.83	784.378	714.712	3
ENSMUSG00000044147	Arf6	1096.47	0.773761	0.251794	16.2918	0.000289916	0.00294784	631.729	852.869	721.212	1242.14	1623.73	1091.16	1347.02	1261.89	3
ENSMUSG00000063445	Nmral1	132.094	1.69394	0.48217	16.2871	0.000290607	0.00294784	62.393	58.7754	54.4311	97.4599	224.266	191.509	203.678	164.235	3
ENSMUSG00000033949	Trim36	43.5332	2.63493	0.65801	16.2819	0.000291363	0.00295251	15.5982	17.5076	13.6078	21.0208	49.9458	46.3184	108.34	75.9278	2
ENSMUSG00000044703	Phf11a	183.731	6.76377	1.60355	16.2824	0.000291285	0.00295251	3.89956	1.25054	4.53592	18.1543	466.16	432.009	393.634	150.205	3
ENSMUSG00000044701	Il27	48.231	4.02352	1.41021	16.2648	0.000293866	0.00297636	2.59971	0	4.53592	10.5104	163.548	154.098	39.0022	11.5542	3
ENSMUSG00000071005	Ccl19	38.0812	-2.27019	0.551782	16.2616	0.000294326	0.00297951	55.8937	63.7776	52.1631	32.4866	38.1938	38.3018	12.2785	11.5542	1
ENSMUSG00000071005	Ccl19	38.0812	-2.27019	0.551782	16.2616	0.000294326	0.00297951	55.8937	63.7776	52.1631	32.4866	38.1938	38.3018	12.2785	11.5542	1
ENSMUSG00000025887	Casp12	693.167	1.71971	0.493891	16.2539	0.000295467	0.00298954	297.666	290.125	332.256	506.409	984.225	1285.34	1314.52	534.796	3
ENSMUSG00000031488	Rab11fip1	349.571	1.24309	0.643295	16.2515	0.000295817	0.00299157	66.2925	106.296	130.408	1267.93	403.483	265.44	291.795	264.922	3
ENSMUSG00000004460	Dnajb11	1266.45	0.9188	0.258704	16.2497	0.000296089	0.0029928	781.212	860.372	924.194	1156.14	1811.76	1443	1615.7	1539.19	3
ENSMUSG00000057396	Zfp759	141.287	-0.197628	0.316649	16.2387	0.000297721	0.00300778	176.78	188.832	180.303	81.2166	100.871	74.8221	169.01	158.458	1
ENSMUSG00000026094	Stk17b	789.717	0.816695	0.436821	16.2236	0.000299981	0.00302908	397.755	312.635	432.047	1909.07	1157.57	599.468	771.378	737.821	3
[truncated: 53,980 more rows]
