# Supplementary material for: SARS-CoV-2 mRNA vaccine is re-adenylated in vivo, enhancing antigen production and immune response
Source: bioRxiv preprint, doi:10.1101/2022.12.01.518149, version 2 (2022-12-16)
Supplement: Supplementary Table 3 [file 518149_file09.xlsx]

## Sheet: Supplementary Table 3
gene	baseMean	log2FoldChange	lfcSE	stat	p.value	adjusted p.value	cluster	normalized expression values
								BMDM_WT_4h_1	BMDM_WT_12h_1	BMDM_WT_24h_1	BMDM_WT_48h_1	BMDM_WT_72h_1	BMDM_WT_0h_2	BMDM_WT_4h_2	BMDM_WT_12h_2	BMDM_WT_24h_2	BMDM_WT_48h_2	BMDM_WT_72h_2	BMDM_WT_0h_3	BMDM_WT_4h_3	BMDM_WT_12h_3	BMDM_WT_24h_3	BMDM_WT_48h_3	BMDM_WT_72h_3
Ccnd1	72.1852	0.125333	0.228121	177.2	2.12059e-36	1.98636e-32	4	75.1668	97.5768	12.9725	22.5325	21.7498	220.494	171.057	142.566	46.7904	29.578	26.1934	102.229	104.889	89.1329	24.4125	16.5285	23.2786
Ifi209	35.1972	0.711356	0.313923	175.147	5.81565e-36	2.72376e-32	2	1.00222	8.02001	31.9989	47.0243	45.6747	1.9687	0.929656	38.2494	91.454	74.3448	45.6272	3.75842	1.88423	21.4778	54.0562	75.0138	55.8686
Id2	153.183	0.224103	0.175532	154.658	1.36088e-31	4.24912e-28	3	296.658	191.144	51.8901	51.9226	89.1743	215.572	264.952	178.497	99.9614	71.9466	91.2545	252.566	324.716	165.379	65.3906	67.3852	125.704
Plau	30.9277	0.321315	0.384817	141.236	9.76873e-29	2.28759e-25	3	77.1713	46.7834	1.72967	6.8577	5.43746	27.5618	35.3269	18.5452	3.19026	5.59585	5.91464	103.732	142.574	28.995	1.74375	7.62852	6.98357
H2-T23	180.609	-0.25094	0.216612	137.341	6.57183e-28	1.23117e-24	1	47.1045	45.4467	223.127	424.198	373.01	76.7792	80.8801	124.021	218.001	323.76	243.345	50.3629	57.1551	68.729	154.322	278.441	281.671
Aif1	50.3125	-1.2433	0.26543	131.861	9.58569e-27	1.49649e-23	1	20.0445	17.3767	48.4307	155.768	178.349	23.6244	15.8041	16.227	46.7904	79.1412	59.1464	13.5303	6.28078	10.7389	20.0531	78.828	65.18
Stat1	125.366	-0.36045	0.302155	128.431	5.12173e-26	6.85361e-23	2	8.0178	45.4467	211.02	310.556	197.923	20.6713	24.1711	184.293	281.806	203.849	105.619	13.5303	14.4458	48.3251	158.681	181.813	121.049
Fcgr1	99.2182	-1.09558	0.305488	126.479	1.32936e-25	1.55652e-22	2	26.0578	49.4567	173.832	292.922	237.073	14.7652	13.0152	88.0896	171.21	133.501	67.5959	6.01348	7.53694	21.4778	100.266	164.013	119.885
Ly6a	13.4231	-1.78331	0.510843	124.019	4.41779e-25	4.59794e-22	1	0	1.33667	10.378	57.8006	26.0998	0.984348	1.85931	1.15907	18.0781	42.3685	41.4025	0	0.628078	0	1.74375	12.7142	11.6393
Oas1a	88.4758	0.10428	0.205875	118.729	5.83451e-24	5.46518e-21	2	14.0311	50.7934	130.59	137.154	118.537	30.5148	39.0455	110.112	137.181	148.69	108.998	26.309	32.032	56.9162	118.575	139.856	104.754
Xaf1	41.3536	0.0480806	0.285098	118.111	7.88616e-24	6.71542e-21	2	2.00445	20.05	44.9714	93.0688	58.7246	6.89044	8.3669	46.363	73.3759	78.3418	59.9914	12.7786	6.28078	20.4039	40.1062	66.1138	65.18
Ifi44l	46.2105	-1.54951	0.318353	116.052	2.15038e-23	1.67855e-20	2	3.00667	38.7634	140.968	159.687	106.574	4.92174	6.50759	37.0904	51.0441	49.5632	35.4878	5.26179	1.88423	7.51723	43.5937	48.3139	45.3932
Gm36161	23.5692	-0.839382	0.337798	115.18	3.28924e-23	2.20074e-20	1	6.01335	5.34667	30.2692	54.8616	60.8995	3.93739	12.0855	5.79537	32.966	51.162	43.0924	1.50337	2.51231	4.29556	13.95	25.4284	46.5571
H2-D1	1137.2	-0.122909	0.131369	115.314	3.08132e-23	2.20074e-20	1	767.704	556.054	1229.79	2031.84	2037.96	705.778	700.031	785.852	1042.15	1465.31	1476.97	741.161	729.827	761.388	998.296	1627.42	1674.89
Ccl2	31.5874	-0.25639	0.289778	114.821	3.91884e-23	2.44719e-20	3	58.129	38.7634	8.64834	13.7154	8.69993	67.92	96.6842	38.2494	19.1415	12.7905	19.4338	45.8528	64.064	18.2561	9.59062	8.89994	8.1475
Id1	12.363	-0.698953	0.541023	114.602	4.35957e-23	2.55226e-20	3	28.0623	34.7534	0	0	0	46.2644	27.8897	9.27259	2.12684	0.799406	2.53485	26.309	13.8177	15.0345	0.871875	1.27142	1.16393
Gm21188	52.2916	-0.439237	0.304898	113.514	7.40528e-23	4.08031e-20	1	11.0245	10.6933	63.9977	135.195	92.4368	26.5774	18.5931	27.8178	55.2978	104.722	84.4949	5.26179	13.8177	6.44334	32.2594	97.8993	102.426
Calr	283.786	0.359709	0.134713	111.707	1.78561e-22	9.29209e-20	4	212.472	319.464	364.96	133.235	156.599	282.508	213.821	445.084	524.266	191.858	201.943	219.492	244.322	383.379	521.381	232.67	176.917
Cd74	55.6086	-1.14655	0.232415	106.657	2.08325e-21	1.02704e-18	1	47.1045	22.7234	73.5109	160.666	155.511	25.5931	15.8041	26.6587	28.7123	70.3478	75.2004	17.2887	16.33	18.2561	22.6687	71.1995	97.77
Abcg1	45.3178	0.133854	0.224274	105.678	3.3521e-21	1.56996e-18	2	22.0489	16.04	64.8626	86.2111	70.687	10.8278	13.0152	25.4996	60.6149	54.3596	43.0924	17.2887	23.2389	16.1084	78.4687	87.728	80.3111
Emp1	68.2873	-0.807144	0.199049	105.075	4.49375e-21	2.00443e-18	3	235.523	112.28	50.1604	43.1056	64.162	81.7009	91.1063	34.7722	25.5221	24.7816	32.108	93.9606	94.8398	75.1723	31.3875	33.0569	37.2457
Pf4	495.538	0.276101	0.184181	102.128	1.88109e-20	8.00916e-18	4	486.079	342.187	400.418	191.036	114.187	1085.74	1248.53	972.463	752.901	326.957	170.68	526.931	520.677	519.763	348.75	208.513	208.343
Oas1g	37.0177	-0.212083	0.325604	101.972	2.02876e-20	8.26236e-18	2	2.00445	12.03	45.8362	80.3331	67.4245	9.84348	6.50759	47.522	74.4393	59.9555	47.3171	9.02021	2.51231	15.0345	45.3375	48.3139	55.8686
Irgm1	72.379	-0.0745674	0.26125	101.44	2.62715e-20	1.02536e-17	2	9.02002	33.4167	118.482	169.483	107.662	22.64	22.3117	74.1807	111.659	91.1323	72.6656	14.282	20.0985	40.8078	91.5468	130.956	100.098
Dtx3l	30.1247	0.0540484	0.2881	100.694	3.77428e-20	1.40587e-17	2	4.0089	14.7033	49.2956	49.9633	34.7997	12.7965	5.57794	37.0904	57.4246	39.1709	34.6429	5.26179	4.39655	18.2561	54.9281	57.2139	32.59
Znfx1	61.8662	-0.35533	0.246487	100.625	3.90228e-20	1.40587e-17	2	16.0356	37.4267	87.3483	114.622	104.399	19.687	17.6635	83.4533	127.61	83.1383	67.5959	12.7786	14.4458	30.0689	76.725	87.728	70.9996
Hspa5	211.376	0.0617051	0.165733	98.2882	1.21271e-19	4.2072e-17	4	157.349	310.107	226.587	173.402	120.712	149.621	142.237	551.719	267.982	136.699	148.711	120.27	124.988	365.123	292.078	175.456	130.36
Irf7	121.302	-0.424739	0.430845	96.2127	3.31751e-19	1.10983e-16	2	3.00667	21.3867	177.291	379.133	311.023	9.84348	15.8041	83.4533	203.113	209.444	133.502	6.76516	7.53694	33.2906	131.653	186.899	148.983
Cd300a	96.8131	0.00676747	0.176087	95.818	4.01707e-19	1.25426e-16	1	52.1157	34.7534	116.753	168.504	173.999	54.1392	51.1311	54.4765	110.596	119.112	130.122	51.1145	65.3201	55.8423	95.9062	165.285	146.655
Ifi47	48.7989	-0.621812	0.338457	95.8319	3.98997e-19	1.25426e-16	2	4.0089	28.07	107.239	113.642	72.8619	11.8122	9.29656	64.9081	108.469	59.9555	33.7979	6.01348	2.51231	20.4039	53.1844	63.571	69.8357
Ifi211	68.2923	1.24263	0.312049	95.2381	5.32055e-19	1.55742e-16	2	4.0089	17.3767	34.5934	66.6177	61.987	15.7496	22.3117	124.021	172.274	112.716	87.0297	15.7854	12.5616	37.5862	101.137	157.656	117.557
Oas3	58.4058	0.098385	0.316451	95.2911	5.18547e-19	1.55742e-16	2	4.0089	16.04	76.1054	125.398	104.399	8.85913	13.9448	77.658	99.9614	90.3329	68.4408	12.7786	10.6773	26.8473	87.1875	86.4565	83.8028
Trim30a	48.6827	-0.230837	0.259925	94.457	7.76822e-19	2.205e-16	2	5.01112	29.4067	83.0241	95.0282	75.0369	14.7652	17.6635	64.9081	80.8199	70.3478	50.6969	11.2753	10.0492	37.5862	61.9031	71.1995	48.885
mt-Cytb	635.907	0.0537919	0.147672	94.3112	8.33651e-19	2.29671e-16	4	901	930.321	449.714	303.698	353.435	1092.63	945.46	870.465	514.695	317.364	439.373	705.832	695.911	884.885	623.39	386.512	395.736
Isg15	121.555	-0.397755	0.421854	93.9854	9.76184e-19	2.61255e-16	2	11.0245	42.7734	155.67	305.658	225.111	7.87479	11.1559	172.702	264.791	195.855	98.014	5.26179	6.28078	39.7339	136.884	207.241	180.409
Hsp90b1	121.901	0.048027	0.148796	93.0197	1.55829e-18	4.05458e-16	4	122.271	163.073	174.697	74.4551	70.687	87.607	102.262	200.52	195.669	71.1472	87.0297	91.7055	95.4679	173.97	199.659	72.4709	89.6225
Ifit3	267.466	0.193122	0.47044	92.6323	1.87974e-18	4.75878e-16	2	2.00445	58.8134	352.852	529.023	448.047	29.5304	16.7338	385.972	638.051	462.057	279.678	11.2753	11.3054	93.4284	356.597	547.982	323.572
Psmb8	94.6881	-0.0675804	0.202399	92.0363	2.50845e-18	6.18333e-16	2	27.0601	56.1401	108.104	161.646	128.324	51.1861	56.709	96.2031	166.957	139.097	125.897	33.8258	28.8916	57.9901	94.1625	129.685	147.819
Gvin2	31.9412	-0.549606	0.325082	90.6121	4.99713e-18	1.20021e-15	2	3.00667	13.3667	69.1868	87.1908	60.8995	2.95304	4.64828	30.1359	63.8051	35.9733	32.108	5.26179	6.28078	20.4039	47.9531	33.0569	26.7704
Pnp	120.757	-0.508015	0.224606	90.3299	5.72809e-18	1.34137e-15	2	33.0734	96.2401	229.181	263.532	163.124	51.1861	40.9049	164.589	224.381	138.297	87.0297	36.8325	30.7758	82.6895	144.731	134.77	131.524
Oasl2	72.3212	-0.306233	0.338936	90.0744	6.48186e-18	1.48087e-15	2	5.01112	28.07	110.699	154.788	114.187	13.7809	28.8193	91.5668	138.244	106.321	102.239	12.027	6.28078	12.8867	93.2906	116.971	94.2782
Ifi206	13.1973	0.883785	0.482007	88.6994	1.26028e-17	2.81071e-15	2	0	0	6.91868	16.6544	21.7498	2.95304	0	11.5907	35.0928	19.9852	25.3485	0.751684	0	6.44334	18.3094	31.7855	26.7704
Ctss	905.501	-0.372204	0.100194	88.598	1.32362e-17	2.88334e-15	1	862.915	761.901	1132.07	1563.56	1399.6	598.484	589.402	634.013	784.803	928.91	1057.88	622.395	587.881	680.846	843.103	1216.75	1129.01
Ifi213	11.8445	1.11715	0.467281	88.4876	1.39621e-17	2.97234e-15	2	1.00222	1.33667	9.51318	10.7764	8.69993	0	0	20.8633	20.205	39.1709	16.899	0	0.628078	8.59112	12.2062	30.5141	20.9507
Gapdh	450.997	0.184783	0.116814	86.9122	2.98955e-17	6.22292e-15	4	460.021	608.184	415.985	239.04	303.41	542.376	510.381	610.832	483.856	302.975	325.305	546.475	493.669	631.447	623.39	253.013	316.588
Rnf213	61.9586	-0.555695	0.296723	85.7839	5.15563e-17	1.04984e-14	2	9.02002	40.1	113.293	154.788	109.837	11.8122	12.0855	95.0441	114.849	79.9406	40.5575	12.7786	13.1896	34.3645	88.0593	71.1995	52.3768
Parp14	69.516	-0.481802	0.325514	85.6072	5.61506e-17	1.097e-14	2	9.02002	21.3867	106.375	157.727	126.149	16.7339	26.0304	103.158	132.927	95.9288	87.8747	8.26853	6.28078	30.0689	65.3906	81.3709	107.081
Tgm2	43.1514	-0.182615	0.242923	85.6048	5.62144e-17	1.097e-14	3	100.222	28.07	16.4319	26.4511	25.0123	97.4505	95.7546	25.4996	29.7757	28.7786	33.7979	63.1415	63.4359	34.3645	20.925	16.5285	27.9343
Ptafr	62.3442	-0.701556	0.18971	85.1526	6.99302e-17	1.33681e-14	2	54.1201	33.4167	102.05	144.012	142.461	15.7496	38.1159	27.8178	57.4246	76.743	62.5262	25.5573	35.8005	26.8473	56.6719	95.3565	65.18
Ube2l6	69.0471	-0.383377	0.291696	84.456	9.78826e-17	1.83373e-14	2	7.01557	33.4167	131.455	159.687	121.799	23.6244	23.2414	76.4989	119.103	83.1383	59.1464	12.7786	14.4458	31.1428	103.753	97.8993	75.6553
Ddit3	48.0432	0.491034	0.234044	83.9901	1.22565e-16	2.25111e-14	1	10.0222	17.3767	44.9714	65.638	66.337	13.7809	39.9752	31.295	60.6149	84.7371	102.239	16.5371	30.1477	35.4384	47.0812	59.7567	90.7864
Lst1	126.239	-0.30029	0.214476	81.7572	3.59822e-16	6.24158e-14	1	56.1246	42.7734	97.7263	319.373	266.435	87.607	84.5987	74.1807	129.737	218.238	145.331	68.4033	56.527	64.4334	90.675	171.642	172.261
Ifi44	96.7908	-0.854587	0.442645	81.83	3.47425e-16	6.24158e-14	2	2.00445	40.1	198.912	267.45	231.636	11.8122	13.0152	98.5213	175.464	139.097	103.929	3.00674	6.28078	22.5517	82.8281	134.77	114.065
Phf11b	19.3215	-0.109691	0.450459	81.7856	3.54927e-16	6.24158e-14	2	0	4.01	19.0264	56.821	30.4498	4.92174	0	17.3861	55.2978	36.7727	10.1394	3.75842	1.25616	7.51723	29.6437	30.5141	20.9507
B2m	1791.18	0.0265822	0.176118	81.6564	3.77739e-16	6.43324e-14	1	798.773	771.257	1799.72	3364.19	3428.86	1086.72	1124.88	1310.91	1899.27	2271.91	2120.82	988.465	1062.71	1257.53	1637.38	2592.42	2934.26
Ifit3b	90.4978	-0.237319	0.534452	81.4875	4.09787e-16	6.85442e-14	2	0	21.3867	108.969	240.02	167.474	5.90609	9.29656	112.43	202.05	167.076	89.5646	2.25505	1.25616	25.7734	88.9312	170.37	125.704
Ifit1	79.8857	0.26715	0.448388	80.5465	6.44941e-16	1.05985e-13	2	4.0089	20.05	123.671	112.662	84.8244	12.7965	13.0152	130.975	183.972	134.3	74.3555	2.25505	2.51231	52.6206	146.475	165.285	94.2782
Gm5431	14.7177	-0.551168	0.44376	80.47	6.69146e-16	1.08067e-13	2	0	2.67334	25.945	44.0852	32.6248	0.984348	0	12.7498	23.3952	27.1798	16.054	3.00674	0.628078	5.36945	12.2062	16.5285	26.7704
Clec4a3	14.8191	-0.719536	0.397108	77.633	2.62285e-15	4.16411e-13	1	2.00445	4.01	17.2967	53.882	45.6747	2.95304	1.85931	6.95444	9.57077	19.1858	11.8293	3.00674	1.25616	4.29556	9.59062	31.7855	26.7704
Lgals1	855.77	0.323736	0.0940652	77.4349	2.88515e-15	4.43036e-13	4	848.884	978.441	774.892	545.677	604.645	972.536	914.781	928.418	799.691	609.148	604.983	1244.04	1185.81	1238.2	981.731	658.595	657.619
Manf	37.6778	-0.223418	0.234078	77.4589	2.85204e-15	4.43036e-13	4	28.0623	96.2401	35.4582	22.5325	26.0998	27.5618	33.4676	96.2031	27.6489	17.5869	29.5732	22.5505	21.9827	77.3201	36.6187	24.157	17.4589
Usp18	34.8486	0.00959515	0.364893	77.3503	3.00492e-15	4.53985e-13	2	0	20.05	44.1066	46.0446	50.0246	12.7965	8.3669	78.817	81.8833	59.9555	26.1934	3.75842	3.14039	25.7734	52.3125	41.9568	37.2457
Ifi204	107.395	-0.0463719	0.257308	77.0358	3.49579e-15	5.19763e-13	2	22.0489	49.4567	144.427	230.223	162.036	41.3426	40.9049	146.043	173.337	129.504	110.688	27.8123	34.5443	64.4334	140.372	152.57	155.966
H2-K1	598.115	0.0789184	0.240306	76.6716	4.16508e-15	6.03568e-13	1	161.358	145.697	508.523	1180.5	1358.28	354.365	371.862	453.198	692.286	916.919	783.267	276.62	285.147	297.468	456.862	831.508	1094.09
Irgm2	24.07	-0.129697	0.371616	76.66	4.18831e-15	6.03568e-13	2	1.00222	10.6933	44.9714	64.6583	23.9248	5.90609	2.78897	31.295	52.1075	25.581	23.6586	3.00674	3.76847	13.9606	37.4906	31.7855	32.59
C1qb	510.221	0.353728	0.153364	76.1417	5.37378e-15	7.62669e-13	1	315.701	191.144	343.339	571.149	525.259	529.579	519.678	453.198	594.451	856.964	804.391	320.218	287.032	273.842	409.781	780.652	897.389
Cd72	61.2851	-0.527439	0.25051	75.1152	8.802e-15	1.23057e-12	2	30.0667	36.09	44.1066	128.337	140.286	21.6557	26.0304	62.59	102.088	95.1294	87.8747	15.0337	19.4704	25.7734	52.3125	71.1995	83.8028
Ctnnb1	97.2406	-0.171814	0.165685	74.059	1.462e-14	2.01391e-12	3	203.452	113.617	80.4296	68.577	70.687	99.4192	147.815	103.158	71.2491	61.5543	50.6969	108.243	144.458	140.68	76.725	48.3139	64.0161
Mndal	49.9283	0.00368093	0.33275	73.3588	2.04634e-14	2.77798e-12	2	1.00222	16.04	81.2944	122.459	80.4744	14.7652	13.9448	52.1583	95.7077	71.1472	45.6272	10.5236	12.5616	32.2167	67.1343	71.1995	60.5243
Ms4a7	570.335	-0.407527	0.135138	73.074	2.34616e-14	3.09529e-12	1	529.175	402.337	583.763	932.648	885.218	460.675	464.828	439.289	584.881	741.05	702.152	334.5	334.766	308.206	386.24	767.937	838.028
Rsad2	188.823	-0.453468	0.458804	73.0914	2.32661e-14	3.09529e-12	2	7.01557	93.5668	348.528	518.246	277.31	15.7496	26.96	366.267	405.163	237.424	100.549	9.02021	11.3054	103.093	260.691	270.812	158.294
Slfn2	184.814	0.146186	0.249625	72.2868	3.42308e-14	4.45333e-12	2	55.1223	48.12	259.45	331.129	305.585	54.1392	128.293	180.816	272.235	266.202	201.943	54.1213	94.2117	99.8718	204.891	347.098	238.605
Trafd1	52.4234	-0.116504	0.267484	71.8792	4.16246e-14	5.34106e-12	2	9.02002	22.7234	78.6999	95.0282	77.2119	17.7183	28.8193	68.3854	90.3906	83.1383	61.6813	15.7854	11.9335	34.3645	55.8	64.8424	75.6553
Gm7592	28.3084	0.939473	0.349733	71.7058	4.52352e-14	5.64958e-12	2	1.00222	5.34667	15.567	39.1869	23.9248	9.84348	9.29656	48.6811	69.1222	61.5543	42.2474	6.01348	6.90886	20.4039	27.9	54.671	39.5736
Sdc3	121.26	-0.542531	0.18223	71.7245	4.48302e-14	5.64958e-12	2	88.1958	65.4967	198.912	223.365	231.636	57.0922	66.9352	93.885	181.845	140.696	115.758	52.6179	57.1551	68.729	148.219	161.47	109.409
Tuba1c	94.2227	-0.198445	0.183842	71.0952	6.06238e-14	7.47188e-12	3	168.374	152.38	51.0252	60.7397	65.2495	135.84	151.534	97.3622	76.5662	47.165	50.6969	129.29	135.665	91.2807	72.3656	53.3996	62.8521
Stat2	36.7445	-0.758508	0.339036	70.8804	6.71996e-14	8.17479e-12	2	5.01112	12.03	70.9164	86.2111	68.512	8.85913	6.50759	56.7946	81.8833	55.9585	37.1777	9.7719	4.39655	20.4039	31.3875	43.2283	25.6064
Cd52	171.162	0.26662	0.191091	70.1847	9.38003e-14	1.11773e-11	2	66.1468	68.1701	123.671	254.715	228.373	139.777	116.207	169.225	263.728	315.766	194.338	96.9673	75.3694	120.276	156.937	259.37	260.72
Cebpb	52.9754	0.010884	0.226518	70.1743	9.42676e-14	1.11773e-11	3	117.26	50.7934	15.567	32.3292	33.7122	68.9044	125.504	56.7946	36.1562	31.9763	52.3868	41.3426	88.559	36.5123	27.0281	36.8712	48.885
Tgtp2	57.6236	-0.138742	0.600596	69.9971	1.0262e-13	1.20155e-11	2	0	6.68334	63.9977	179.28	104.399	4.92174	3.71862	54.4765	145.688	99.1264	40.5575	0.751684	1.25616	16.1084	61.0312	120.785	76.8193
Pdia6	52.0962	-0.367428	0.209504	69.2315	1.48093e-13	1.71258e-11	4	61.1357	102.923	78.6999	39.1869	27.1873	42.327	33.4676	91.5668	78.693	26.3804	21.1237	36.0809	35.8005	76.2462	79.3406	22.8856	32.59
Txnip	167.644	0.591217	0.227421	69.0012	1.65361e-13	1.88895e-11	2	42.0934	41.4367	138.374	241.979	170.736	201.791	108.77	115.907	294.567	255.81	192.648	78.1752	72.8571	95.5762	260.691	284.798	253.736
Pltp	151.688	-0.813957	0.140961	67.9792	2.69713e-13	3.04386e-11	1	159.354	116.29	221.398	369.336	295.798	88.5913	81.8097	77.658	106.342	169.474	147.021	102.229	82.2782	103.093	117.703	184.356	155.966
Tap1	39.5513	0.153161	0.305381	67.8641	2.84989e-13	3.16914e-11	2	4.0089	13.3667	49.2956	89.1501	55.4621	12.7965	17.6635	41.7267	63.8051	61.5543	37.1777	14.282	8.16502	28.995	40.9781	69.9281	64.0161
Mef2a	44.9824	0.518353	0.221304	67.8452	2.8758e-13	3.16914e-11	3	59.1312	32.08	21.6209	19.5934	21.7498	91.5444	75.3021	35.9313	38.2831	27.9792	33.7979	82.6853	89.1871	49.3989	34.0031	27.9712	24.4425
Igtp	29.6686	-0.524011	0.431473	67.5974	3.23779e-13	3.52655e-11	2	1.00222	6.68334	57.0791	72.4957	42.4122	2.95304	11.1559	59.1128	62.7417	39.1709	30.4182	1.50337	0.628078	19.33	31.3875	40.6854	25.6064
Tapbp	132.102	-0.168386	0.216202	67.1605	3.99053e-13	4.29647e-11	2	42.0934	62.8234	171.237	240.999	213.148	88.5913	84.5987	129.816	205.24	186.262	131.812	54.873	53.3866	63.3595	156.937	203.427	157.13
Gpr162	31.6327	-0.158341	0.256225	66.9486	4.41619e-13	4.70073e-11	1	12.0267	10.6933	39.7824	67.5974	55.4621	13.7809	19.5228	19.7043	31.9026	48.7638	40.5575	14.282	14.4458	13.9606	24.4125	58.4853	52.3768
Samhd1	103.189	-0.287727	0.255805	66.7842	4.77727e-13	5.02795e-11	2	19.0423	44.11	162.589	226.304	189.224	57.0922	40.9049	103.158	174.401	122.309	117.448	36.8325	37.6847	56.9162	108.984	151.299	105.917
Themis2	51.4435	-0.550779	0.302378	66.2877	6.05732e-13	6.30432e-11	2	9.02002	25.3967	96.8615	122.459	90.2618	22.64	12.0855	66.0672	104.215	53.5602	38.0227	15.0337	10.6773	30.0689	54.0562	77.5566	46.5571
Eno1	143.228	0.839192	0.178814	66.0713	6.71748e-13	6.91457e-11	4	122.271	191.144	70.9164	37.2275	57.6371	195.885	182.213	230.656	140.371	96.7282	112.378	192.431	190.936	230.886	197.916	85.1851	100.098
Dhx58	21.9264	-0.353932	0.328797	64.9969	1.12242e-12	1.14279e-10	2	2.00445	10.6933	39.7824	43.1056	39.1497	4.92174	8.3669	26.6587	38.2831	33.5751	25.3485	3.00674	5.6527	13.9606	33.1312	24.157	20.9507
Ifit2	199.109	-0.174339	0.584893	64.7726	1.24932e-12	1.25833e-10	2	3.00667	30.7434	316.529	544.698	355.61	5.90609	19.5228	268.905	463.651	306.972	135.192	7.51684	3.76847	56.9162	265.05	375.069	225.802
Phf11d	21.3536	-0.303812	0.425709	63.9594	1.84193e-12	1.83546e-10	2	0	8.02001	26.8099	58.7803	42.4122	1.9687	2.78897	23.1815	57.4246	27.9792	21.1237	4.51011	3.14039	8.59112	20.0531	31.7855	24.4425
Ubb	599.991	0.234942	0.114996	63.2917	2.53297e-12	2.49751e-10	2	392.872	423.724	532.738	683.811	691.645	452.8	530.833	622.423	730.569	793.011	714.827	348.782	434.002	518.689	638.212	836.594	854.323
Parp12	32.6932	-0.444775	0.270169	62.6599	3.42379e-12	3.3407e-10	2	9.02002	17.3767	65.7274	51.9226	40.2372	14.7652	17.6635	44.0448	66.9954	55.159	32.108	10.5236	8.16502	16.1084	40.1062	35.5998	30.2621
Ccl7	19.1738	-1.07105	0.367879	62.5598	3.59113e-12	3.46785e-10	3	35.0779	22.7234	5.18901	14.6951	16.3124	44.2957	70.6538	15.068	9.57077	10.3923	11.8293	19.5438	28.8916	8.59112	3.4875	3.81426	5.81964
Vsir	68.613	-0.166825	0.178507	62.3842	3.90472e-12	3.7322e-10	1	49.109	37.4267	94.2669	107.764	102.224	48.2331	31.6083	35.9313	73.3759	96.7282	95.4792	49.6112	38.3128	47.2512	86.3156	75.0138	97.77
Clec4a1	16.7323	-1.40763	0.378948	62.3585	3.95278e-12	3.73997e-10	1	7.01557	5.34667	31.134	59.76	58.7246	1.9687	5.57794	3.47722	13.8244	17.5869	14.3641	4.51011	2.51231	3.22167	5.23125	29.2427	20.9507
Ifi35	29.4053	-0.142481	0.277907	62.247	4.16858e-12	3.90471e-10	2	4.0089	21.3867	43.2417	36.2479	41.3247	12.7965	16.7338	37.0904	55.2978	51.9614	40.5575	8.26853	6.28078	21.4778	25.2844	40.6854	37.2457
Atrip	37.9118	-0.132909	0.307102	62.1464	4.37339e-12	4.056e-10	2	7.01557	17.3767	40.6472	71.5161	86.9993	6.89044	18.5931	46.363	59.5515	54.3596	42.2474	10.5236	10.0492	19.33	49.6969	52.1282	51.2128
Gm10925	211.471	0.0991319	0.156158	61.7862	5.19244e-12	4.76839e-10	4	249.554	334.167	169.508	136.174	117.449	311.054	290.982	221.383	159.513	105.522	149.556	269.103	275.726	295.32	217.969	150.028	141.999
Pld4	89.6619	-0.518565	0.246353	61.6763	5.4716e-12	4.97597e-10	1	36.0801	20.05	118.482	193.975	184.874	60.0452	77.1614	53.3174	114.849	149.489	133.502	42.0943	31.4039	40.8078	53.1844	105.528	109.409
Sp100	53.3947	-0.116177	0.272626	61.6274	5.60041e-12	5.04414e-10	2	7.01557	24.06	74.3758	94.0485	88.0868	26.5774	20.4524	79.9761	95.7077	71.1472	67.5959	22.5505	15.702	33.2906	68.0062	59.7567	59.3603
Pdgfa	10.5275	-0.255128	0.474232	61.2501	6.70325e-12	5.97994e-10	3	27.0601	16.04	1.72967	2.93902	4.34997	16.7339	31.6083	3.47722	4.25368	2.39822	4.22474	19.5438	29.5197	4.29556	3.4875	3.81426	3.49178
Psmb10	61.9934	0.241753	0.254903	61.0778	7.27643e-12	6.43003e-10	2	15.0334	26.7334	78.6999	84.2518	69.5995	23.6244	39.9752	106.635	123.357	91.9317	68.4408	15.0337	29.5197	38.66	74.9812	94.0851	73.3275
Slfn5	78.706	-0.443982	0.265392	61.0391	7.41192e-12	6.48855e-10	2	25.0556	36.09	138.374	176.341	123.974	18.7026	41.8345	106.635	145.688	104.722	76.8903	22.5505	27.0074	44.0295	78.4687	88.9994	82.6389
mt-Co2	1708.97	-0.0842889	0.124514	59.6587	1.42977e-11	1.24006e-09	4	2285.07	2351.2	1538.54	1130.54	1145.13	2617.38	2114.97	2115.31	1636.6	1028.04	1323.19	1786	1788.77	1951.26	1800.42	1190.05	1250.06
Epsti1	26.7014	0.00391842	0.354191	59.1381	1.83136e-11	1.57379e-09	2	3.00667	6.68334	38.9175	65.638	38.0622	8.85913	6.50759	33.6131	47.8539	31.9763	26.1934	7.51684	6.90886	10.7389	44.4656	43.2283	33.7539
mt-Atp6	1015.74	-0.0908318	0.147577	59.0366	1.92194e-11	1.63662e-09	4	1468.26	1464.99	874.348	602.498	714.482	1570.04	1318.25	1244.85	810.325	493.234	817.91	1105.73	1080.92	1265.04	1072.41	704.367	659.947
Sdf2l1	34.1986	0.542408	0.253707	58.9229	2.02872e-11	1.71198e-09	4	22.0489	54.8034	39.7824	15.6748	6.52495	27.5618	29.749	76.4989	46.7904	19.9852	22.8136	22.5505	27.0074	64.4334	55.8	33.0569	16.295
Ifi27	30.0101	0.704457	0.344594	58.8075	2.14314e-11	1.79239e-09	4	42.0934	32.08	19.8912	0.979672	6.52495	57.0922	49.2718	41.7267	8.50735	16.7875	13.5192	62.3898	50.2462	62.2856	21.7969	6.3571	18.6229
Psme2	89.9087	0.203193	0.177456	58.5864	2.38062e-11	1.97339e-09	2	43.0957	54.8034	116.753	101.886	80.4744	51.1861	65.0759	106.635	151.006	135.899	122.518	50.3629	50.8743	55.8423	109.856	102.985	129.196
Samd9l	31.7378	-0.666279	0.297208	58.0954	3.00607e-11	2.46999e-09	2	7.01557	22.7234	51.0252	71.5161	61.987	13.7809	12.0855	39.4085	46.7904	38.3715	31.2631	8.26853	6.28078	12.8867	40.1062	45.7711	30.2621
Ubc	554.532	0.122382	0.13307	57.8616	3.35917e-11	2.73612e-09	2	436.97	439.764	499.009	728.876	687.295	283.492	477.843	555.196	700.793	694.684	556.821	315.707	428.977	422.039	614.672	849.308	735.603
Herc6	24.4317	0.172948	0.419369	57.5543	3.887e-11	3.13876e-09	2	0	6.68334	31.9989	46.0446	34.7997	4.92174	6.50759	45.2039	57.4246	38.3715	17.7439	5.26179	3.14039	13.9606	27.0281	48.3139	27.9343
Ptms	209.509	-0.115813	0.140001	56.924	5.24279e-11	4.19737e-09	2	176.392	108.27	259.45	313.495	283.835	180.136	162.69	136.771	243.523	265.403	198.563	186.418	185.911	105.241	198.787	307.684	249.081
Cmpk2	99.2526	0.0400394	0.547343	56.7973	5.56762e-11	4.41965e-09	2	2.00445	38.7634	140.103	251.776	127.237	5.90609	8.3669	245.724	232.889	109.519	42.2474	6.01348	7.53694	65.5073	153.45	165.285	84.9668
mt-Co3	956.756	0.00112036	0.152728	56.7622	5.661e-11	4.45601e-09	4	1309.91	1493.06	761.919	554.494	563.321	1443.05	1253.18	1239.05	860.306	512.42	730.036	929.834	1022.51	1231.75	1041.02	677.667	641.324
Itm2b	1028.57	-0.225254	0.137177	56.3836	6.77496e-11	5.28842e-09	1	932.069	673.681	1138.12	1617.44	1482.25	866.226	744.654	795.125	1010.25	1241.48	1114.49	645.697	596.046	736.689	941.625	1603.26	1346.67
Tubb6	26.9099	0.00610803	0.342006	56.3209	6.97935e-11	5.40294e-09	3	67.149	54.8034	6.91868	5.87803	10.8749	43.3113	49.2718	18.5452	12.761	11.9911	10.1394	46.6044	48.362	22.5517	12.2062	13.9856	22.1146
Oasl1	9.94685	-0.223962	0.531353	55.7715	9.05648e-11	6.95345e-09	2	0	2.67334	6.05384	24.4918	15.2249	1.9687	0.929656	10.4317	30.8392	24.7816	11.8293	1.50337	0.628078	1.07389	12.2062	13.9856	10.4754
Nek6	16.3635	-0.481072	0.394765	55.269	1.14917e-10	8.75146e-09	3	44.0979	34.7534	6.05384	3.91869	5.43746	34.4522	21.3821	11.5907	8.50735	3.99703	11.8293	28.564	25.1231	20.4039	2.61562	3.81426	11.6393
Itgav	31.5942	0.252449	0.32944	55.1433	1.21966e-10	9.21336e-09	3	69.1535	34.7534	10.378	8.81705	4.34997	57.0922	55.7794	32.4541	23.3952	21.584	28.7283	62.3898	57.7832	27.9211	9.59062	17.7999	15.1311
Mt1	134.17	0.0379834	0.199181	54.733	1.48135e-10	1.11006e-08	3	205.456	164.41	140.968	73.4754	80.4744	190.964	148.745	56.7946	80.8199	59.1561	107.308	279.627	247.463	99.8718	148.219	87.728	109.409
Kcnn4	53.2437	1.11511	0.24972	54.5635	1.60512e-10	1.19326e-08	3	51.1134	41.4367	9.51318	11.7561	19.5749	118.122	82.7394	66.0672	37.2197	57.5573	38.8676	90.2021	96.724	75.1723	27.0281	34.3283	47.7211
mt-Nd3	159.371	-0.347245	0.220999	54.1025	1.99656e-10	1.47258e-08	4	212.472	364.91	141.833	96.9875	85.9118	297.273	182.213	195.884	131.864	47.9644	95.4792	132.296	172.093	226.591	129.909	69.9281	125.704
Etv5	13.4344	0.176213	0.428628	54.0182	2.07788e-10	1.52059e-08	4	16.0356	17.3767	1.72967	4.89836	5.43746	36.4209	31.6083	15.068	9.57077	5.59585	5.06969	22.5505	29.5197	17.1822	1.74375	5.08568	3.49178
Mpeg1	430.977	-0.481735	0.124354	53.7283	2.3834e-10	1.73064e-08	2	462.025	366.247	659.004	760.225	610.083	229.353	243.57	303.677	454.08	534.803	403.885	318.714	314.667	299.615	394.087	517.468	455.096
Trex1	24.9958	0.183382	0.387692	53.3551	2.84344e-10	2.04881e-08	2	2.00445	4.01	23.3505	38.2072	41.3247	8.85913	18.5931	33.6131	51.0441	45.5662	35.4878	1.50337	3.76847	15.0345	32.2594	33.0569	37.2457
Parp9	27.4076	-0.0267854	0.364961	53.2365	3.00758e-10	2.15054e-08	2	2.00445	6.68334	51.8901	56.821	48.9371	6.89044	9.29656	32.4541	41.4733	32.7757	22.8136	6.01348	6.28078	24.6995	36.6187	54.671	25.6064
Cpd	24.3658	-0.44553	0.285923	53.088	3.22626e-10	2.28942e-08	4	39.0868	62.8234	16.4319	13.7154	10.8749	20.6713	40.9049	44.0448	18.0781	10.3923	16.899	24.8056	28.8916	34.3645	16.5656	6.3571	9.31143
Tubb5	108.996	-0.118654	0.186869	52.8592	3.59487e-10	2.53182e-08	4	122.271	196.49	82.1593	66.6177	80.4744	162.417	158.971	111.271	82.9467	63.9525	69.2858	143.572	158.276	138.532	96.7781	71.1995	47.7211
Vim	571.365	-0.0134424	0.13868	52.7142	3.84984e-10	2.69115e-08	4	833.851	898.241	462.686	340.926	434.997	636.873	581.965	559.833	448.763	390.91	470.636	814.074	779.445	729.171	551.897	361.083	417.85
H2-Q4	13.2369	0.443722	0.450774	52.4179	4.42836e-10	3.07263e-08	1	1.00222	0	8.64834	20.5731	32.6248	1.9687	10.2262	6.95444	19.1415	27.9792	19.4338	3.00674	7.53694	2.14778	8.71875	31.7855	23.2786
Gvin1	16.8609	-1.96866	0.449567	52.0345	5.30772e-10	3.65569e-08	2	2.00445	14.7033	51.8901	61.7193	41.3247	1.9687	4.64828	16.227	20.205	16.7875	10.9843	0	0.628078	4.29556	17.4375	10.1714	11.6393
Il18bp	10.8397	-1.90783	0.535297	51.7541	6.05899e-10	4.14267e-08	2	5.01112	2.67334	14.7022	46.0446	48.9371	0	0	3.47722	13.8244	11.1917	5.91464	0.751684	1.25616	0	3.4875	16.5285	10.4754
Rnf114	40.7488	-0.251328	0.21722	51.6954	6.22925e-10	4.22822e-08	2	17.0378	37.4267	51.0252	74.4551	58.7246	18.7026	23.2414	35.9313	49.9807	71.1472	39.7126	21.0472	18.2143	39.7339	35.7469	61.0281	39.5736
Trim25	46.3834	0.238533	0.209366	51.6477	6.37118e-10	4.29344e-08	2	22.0489	34.7534	48.4307	65.638	65.2495	14.7652	22.3117	50.9993	55.2978	67.1501	46.4722	26.309	28.8916	46.1773	53.1844	82.6423	58.1964
Ifi207	97.7042	-0.0647374	0.201803	51.394	7.18139e-10	4.80486e-08	2	35.0779	69.5067	111.564	167.524	170.736	62.9983	55.7794	97.3622	113.786	111.117	98.014	48.8595	52.7586	74.0984	97.65	147.485	146.655
Slfn8	12.6435	0.0631056	0.427432	51.3755	7.24457e-10	4.81276e-08	2	0	6.68334	9.51318	27.4308	19.5749	2.95304	2.78897	18.5452	24.4586	24.7816	15.2091	3.00674	1.88423	7.51723	10.4625	20.3427	19.7868
Selplg	50.5319	-0.120716	0.196567	51.2301	7.75884e-10	5.1181e-08	2	37.0823	24.06	65.7274	72.4957	73.9494	37.4052	26.96	26.6587	78.693	66.3507	59.9914	40.591	28.8916	28.995	61.9031	69.9281	59.3603
Lgals3bp	37.1959	-1.48886	0.313306	50.7284	9.83052e-10	6.43933e-08	2	11.0245	18.7134	91.6724	142.052	102.224	8.85913	9.29656	24.3406	41.4733	37.5721	27.8833	10.5236	7.53694	18.2561	22.6687	27.9712	30.2621
Tmem140	53.8495	0.787206	0.225786	50.607	1.04097e-09	6.77138e-08	2	26.0578	12.03	51.0252	63.6787	50.0246	33.4678	23.2414	47.522	90.3906	74.3448	57.4565	31.5707	33.2881	53.6945	88.0593	100.442	79.1471
Fcgr4	40.3605	-0.516311	0.264078	50.2563	1.22815e-09	7.93382e-08	2	27.0601	14.7033	45.8362	97.9672	86.9993	24.6087	22.3117	15.068	57.4246	45.5662	38.0227	24.0539	16.9581	18.2561	28.7719	72.4709	50.0489
Sat1	147.567	-0.259956	0.241729	50.0585	1.34809e-09	8.59504e-08	2	54.1201	53.4667	231.776	351.702	292.535	62.0139	77.1614	101.999	209.494	161.48	158.85	75.9201	89.1871	90.2068	149.091	184.356	165.278
Fam20c	81.8636	0.164436	0.174559	50.0573	1.34885e-09	8.59504e-08	4	124.276	105.597	45.8362	47.0243	50.0246	84.6539	114.348	120.544	62.7417	66.3507	74.3555	100.726	121.847	100.946	61.0312	50.8568	60.5243
Psme1	73.3647	-0.222528	0.202385	49.9959	1.3885e-09	8.78786e-08	2	47.1045	37.4267	95.9966	128.337	100.049	42.327	56.709	71.8626	106.342	95.9288	79.4252	30.0674	36.4285	45.1034	68.8781	114.428	90.7864
Cotl1	172.749	-0.500252	0.154695	49.693	1.60141e-09	1.00674e-07	3	331.736	219.214	209.29	175.361	137.024	251.009	206.384	97.3622	101.025	115.115	103.084	220.244	203.497	164.305	153.45	146.213	102.426
Ctla2a	19.2935	1.67387	0.401759	49.504	1.75049e-09	1.09312e-07	4	6.01335	9.35668	6.05384	3.91869	1.08749	55.1235	45.5531	33.6131	20.205	15.1887	7.60454	38.3359	30.7758	23.6256	13.95	15.257	2.32786
Il10ra	26.6606	-0.113941	0.279264	49.4328	1.8102e-09	1.12292e-07	1	7.01557	17.3767	35.4582	42.1259	35.8872	14.7652	21.3821	17.3861	30.8392	43.1679	48.1621	8.26853	13.1896	8.59112	27.0281	40.6854	41.9014
Ddx58	33.7456	0.0613069	0.367346	49.4033	1.83548e-09	1.13111e-07	2	2.00445	12.03	47.5659	63.6787	54.3746	8.85913	17.6635	52.1583	62.7417	48.7638	23.6586	8.26853	6.90886	20.4039	42.7219	62.2996	39.5736
Tgtp1	5.20411	-0.284849	0.723695	49.2621	1.96169e-09	1.20099e-07	2	0	0	8.64834	17.6341	5.43746	0	0	2.31815	13.8244	11.9911	4.22474	0	0	0	5.23125	6.3571	12.8032
Pgam1	157.315	0.079213	0.178553	49.1637	2.05467e-09	1.24975e-07	4	242.538	270.007	144.427	84.2518	79.3869	142.73	154.323	185.452	130.801	106.321	115.758	187.921	190.308	268.473	182.222	106.799	82.6389
Unc93b1	116.186	-0.556462	0.190831	49.0554	2.16218e-09	1.30666e-07	2	80.178	69.5067	186.804	236.101	177.261	87.607	68.7945	101.999	149.942	126.306	113.223	60.1348	54.6428	55.8423	108.112	160.199	138.507
Ifi208	6.92478	1.34024	0.618294	48.7792	2.46224e-09	1.47845e-07	2	0	1.33667	3.45934	5.87803	5.43746	0.984348	0	10.4317	21.2684	17.5869	7.60454	0	0.628078	2.14778	10.4625	16.5285	13.9671
Tubb4b	34.3952	0.107966	0.256276	48.5612	2.72818e-09	1.6277e-07	4	49.109	62.8234	21.6209	10.7764	14.1374	58.0765	42.7642	44.0448	27.6489	22.3834	19.4338	51.1145	53.3866	41.8817	28.7719	21.6141	15.1311
Plin2	362.226	-0.215482	0.201152	48.4789	2.83585e-09	1.68123e-07	1	445.99	326.147	251.667	467.304	590.508	170.292	146.886	275.86	305.201	493.234	564.426	213.478	222.34	227.665	293.822	512.382	650.636
Anxa4	174.295	-0.268445	0.131403	48.0621	3.44977e-09	2.01962e-07	2	175.389	183.123	226.587	245.898	241.423	73.8261	115.277	164.589	186.098	175.07	186.734	101.477	119.335	151.418	182.222	225.041	209.507
Gm28437	339.208	0.0357244	0.156002	48.0735	3.43137e-09	2.01962e-07	4	471.045	525.31	302.692	192.995	199.011	495.127	416.486	379.017	296.694	186.262	245.035	343.52	404.482	422.039	370.547	255.555	260.72
Rhob	71.1063	-0.24201	0.229377	47.8203	3.86492e-09	2.24862e-07	3	182.405	98.9134	27.6747	40.1666	53.2871	97.4505	105.051	56.7946	39.3465	47.9644	73.5105	84.1887	89.1871	66.5812	35.7469	54.671	55.8686
Daxx	21.5407	-0.719463	0.344133	47.5615	4.36471e-09	2.52372e-07	2	5.01112	16.04	37.1879	60.7397	38.0622	4.92174	6.50759	13.9089	45.727	16.7875	27.8833	6.76516	5.02462	16.1084	28.7719	21.6141	15.1311
Nt5c3	27.9643	-0.47564	0.332463	47.2999	4.93537e-09	2.83617e-07	2	6.01335	10.6933	45.8362	72.4957	45.6747	11.8122	12.0855	37.0904	40.4099	35.1739	25.3485	8.26853	5.6527	13.9606	31.3875	43.2283	30.2621
Mx2	6.95433	-0.443176	0.587105	47.2234	5.1158e-09	2.90719e-07	2	0	1.33667	15.567	17.6341	9.78743	0	0.929656	9.27259	19.1415	7.99406	5.91464	0	0	4.29556	6.975	8.89994	10.4754
Adam8	137.47	-0.500804	0.19485	47.2212	5.12102e-09	2.90719e-07	3	305.678	295.404	89.9428	79.3534	109.837	144.699	165.479	146.043	119.103	82.3389	87.0297	157.102	160.16	134.236	93.2906	78.828	88.4586
Clec4n	30.8937	-1.50447	0.349217	46.9619	5.78392e-09	3.26373e-07	1	32.0712	36.09	31.134	67.5974	55.4621	19.687	15.8041	20.8633	12.761	40.7697	70.9757	6.01348	4.39655	13.9606	3.4875	39.414	54.7046
Cxcl16	58.3862	0.152953	0.234589	46.1924	8.29879e-09	4.65478e-07	1	34.0756	22.7234	29.4044	65.638	77.2119	46.2644	70.6538	71.8626	82.9467	103.123	103.084	18.0404	31.4039	30.0689	34.875	69.9281	101.262
Gbp2	19.4507	-0.78132	0.478491	46.1466	8.47905e-09	4.72758e-07	2	2.00445	5.34667	31.134	48.9836	23.9248	1.9687	9.29656	40.5676	64.8686	31.1769	10.1394	1.50337	3.76847	3.22167	19.1812	25.4284	8.1475
Neurl3	42.7464	0.14695	0.233075	45.9631	9.24077e-09	5.12179e-07	2	22.0489	21.3867	38.0527	56.821	57.6371	23.6244	46.4828	35.9313	60.6149	69.5484	54.9217	18.0404	27.6354	15.0345	50.5687	72.4709	55.8686
Slamf7	14.8547	0.492994	0.414999	45.4631	1.16803e-08	6.43585e-07	2	4.0089	1.33667	15.567	21.5528	32.6248	1.9687	0.929656	12.7498	23.3952	24.7816	13.5192	5.26179	6.28078	8.59112	15.6937	30.5141	33.7539
Phf11a	11.7951	-1.49261	0.542869	45.138	1.36014e-08	7.45053e-07	2	0	8.02001	19.0264	50.9429	29.3623	0	2.78897	9.27259	24.4586	11.1917	7.60454	2.25505	0	1.07389	14.8219	12.7142	6.98357
Esd	201.837	0.0366044	0.230334	45.0539	1.4147e-08	7.70434e-07	4	346.77	455.804	117.617	94.0485	80.4744	166.355	202.665	385.972	165.893	141.495	172.37	137.558	184.027	300.689	185.709	115.699	178.081
Txnrd1	54.8033	-0.0555039	0.330991	45.039	1.42466e-08	7.71375e-07	4	147.327	118.963	13.8374	12.7357	16.3124	63.9826	103.192	77.658	31.9026	27.9792	62.5262	38.3359	59.0393	63.3595	20.925	30.5141	43.0653
Ell2	20.3599	-0.113513	0.324569	44.9869	1.45982e-08	7.85871e-07	3	37.0823	37.4267	2.5945	8.81705	19.5749	23.6244	40.9049	27.8178	10.6342	10.3923	16.054	23.3022	35.8005	16.1084	6.975	12.7142	16.295
Itgam	25.5575	-0.606123	0.29457	44.904	1.51754e-08	8.12274e-07	4	32.0712	42.7734	37.1879	16.6544	19.5749	41.3426	28.8193	28.9768	23.3952	7.19466	6.75959	45.8528	43.3374	21.4778	21.7969	11.4428	5.81964
Bcl2l1	31.1704	0.0515809	0.260531	44.7817	1.60696e-08	8.55251e-07	3	63.1401	36.09	17.2967	10.7764	19.5749	41.3426	52.0607	27.8178	19.1415	22.3834	27.0384	52.6179	48.9901	33.2906	14.8219	19.0713	24.4425
Ran	67.6238	-0.268964	0.20418	44.5751	1.77002e-08	9.3671e-07	4	136.303	130.993	35.4582	43.1056	51.1121	76.7792	67.8649	81.1352	38.2831	43.9674	59.1464	76.6718	80.394	85.9112	40.1062	40.6854	61.6882
Azin1	52.4284	-0.162769	0.2086	44.3896	1.93051e-08	1.0159e-06	4	100.222	105.597	31.134	39.1869	31.5373	46.2644	61.3573	62.59	37.2197	29.578	34.6429	53.3696	81.0221	64.4334	34.875	44.4997	33.7539
Psmb9	43.2736	-0.199287	0.291464	44.3747	1.94398e-08	1.01728e-06	2	18.04	12.03	64.8626	80.3331	71.7745	16.7339	24.1711	49.8402	64.8686	63.1531	39.7126	21.7989	13.1896	21.4778	44.4656	82.6423	46.5571
Lacc1	33.7469	-0.247339	0.272118	44.2781	2.03381e-08	1.05837e-06	2	12.0267	12.03	44.9714	66.6177	57.6371	20.6713	22.3117	30.1359	45.727	49.5632	34.6429	18.7921	8.79309	20.4039	40.1062	50.8568	38.4096
Sp110	40.1998	-0.00338958	0.324832	44.2515	2.05932e-08	1.06573e-06	2	6.01335	13.3667	51.8901	81.3128	77.2119	17.7183	14.8745	42.8857	73.3759	56.7579	35.4878	16.5371	19.4704	16.1084	51.4406	49.5854	59.3603
Gbp3	16.9359	-0.584866	0.509032	44.1849	2.12446e-08	1.08742e-06	2	1.00222	4.01	31.9989	37.2275	17.3999	4.92174	10.2262	27.8178	48.9173	23.9822	15.2091	1.50337	0.628078	1.07389	20.0531	27.9712	13.9671
Eif4a1	218.104	-0.467837	0.141252	44.1908	2.11861e-08	1.08742e-06	3	416.925	362.237	167.778	206.711	200.098	221.478	279.826	212.111	151.006	145.492	171.525	236.029	261.28	182.561	158.681	151.299	182.737
Lrp1	94.0076	-0.548054	0.160195	44.0618	2.25032e-08	1.14558e-06	3	164.365	143.023	110.699	74.4551	77.2119	109.263	121.785	104.317	70.1857	58.3567	66.7509	118.766	101.121	86.9851	76.725	41.9568	72.1636
Ms4a6b	65.8702	-0.685333	0.517282	43.8777	2.45247e-08	1.24175e-06	2	11.0245	6.68334	114.158	226.304	151.161	25.5931	13.9448	32.4541	92.5175	92.7311	45.6272	8.26853	12.5616	4.29556	58.4156	116.971	107.081
Atp6v0a1	74.5846	-0.251814	0.174422	43.6965	2.66913e-08	1.34418e-06	3	143.318	108.27	63.9977	56.821	59.812	79.7322	88.3173	53.3174	49.9807	49.5632	49.852	114.256	104.261	88.059	51.4406	53.3996	53.5407
Ifit1bl1	15.6648	-1.81409	0.810051	43.1939	3.37533e-08	1.69074e-06	2	0	2.67334	44.1066	91.1095	27.1873	0	0.929656	8.11352	37.2197	13.5899	1.6899	0	0	2.14778	16.5656	13.9856	6.98357
Tuba1b	153.017	-0.281922	0.173807	43.1083	3.51301e-08	1.75034e-06	4	160.356	286.047	152.211	155.768	100.049	201.791	184.072	156.475	106.342	83.1383	96.3241	206.713	195.96	193.3	142.116	85.1851	95.4421
Zbp1	39.625	-0.278818	0.668484	42.6329	4.38528e-08	2.17338e-06	2	0	2.67334	75.2406	130.296	63.0745	2.95304	6.50759	46.363	81.8833	63.1531	33.7979	0.751684	2.51231	11.8128	30.5156	67.3852	54.7046
Dusp6	15.4682	0.277827	0.426522	42.5731	4.50942e-08	2.22314e-06	3	13.0289	16.04	4.32417	2.93902	4.34997	70.8731	12.0855	27.8178	14.8879	11.1917	6.75959	24.8056	11.9335	22.5517	3.4875	8.89994	6.98357
Ifih1	20.3503	-0.339488	0.368406	42.4589	4.75598e-08	2.32837e-06	2	2.00445	9.35668	31.9989	33.3088	39.1497	6.89044	10.2262	32.4541	40.4099	29.578	20.2788	4.51011	4.39655	10.7389	23.5406	20.3427	26.7704
Irf1	21.6308	-0.422934	0.36263	42.4515	4.77258e-08	2.32837e-06	2	2.00445	13.3667	38.9175	39.1869	30.4498	9.84348	16.7338	20.8633	45.727	27.9792	22.8136	6.01348	3.76847	6.44334	24.4125	39.414	19.7868
Pcna	129.316	-0.682461	0.222417	42.2869	5.15308e-08	2.50098e-06	4	306.681	423.724	95.9966	107.764	83.7369	82.6853	89.247	124.021	79.7564	48.7638	78.5802	118.014	118.707	187.931	90.675	72.4709	89.6225
Skil	15.8941	0.299701	0.351559	42.1349	5.53162e-08	2.67086e-06	3	24.0534	13.3667	6.91868	4.89836	8.69993	24.6087	38.1159	22.0224	6.38051	12.7905	10.9843	27.8123	29.5197	18.2561	6.10312	6.3571	9.31143
mt-Nd1	610.79	-0.145588	0.173302	41.8459	6.3289e-08	3.04014e-06	4	873.94	1034.58	406.472	335.048	456.747	1018.8	783.7	771.943	510.441	332.553	555.976	588.569	578.46	722.728	571.078	423.383	419.014
Selenop	532.634	-0.748212	0.177146	41.6103	7.06268e-08	3.37531e-06	1	626.39	330.157	1368.17	1134.46	725.357	382.911	318.872	205.156	343.484	454.063	317.701	384.862	364.913	321.093	496.097	821.337	459.752
Ms4a4c	34.187	-1.92031	0.920787	41.3571	7.94636e-08	3.77835e-06	2	0	0	38.0527	204.751	138.111	0.984348	0	11.5907	60.6149	46.3656	16.054	0.751684	0	2.14778	12.2062	21.6141	27.9343
H2-Aa	14.0391	-1.11959	0.385219	41.2857	8.21487e-08	3.8863e-06	1	14.0311	5.34667	12.9725	39.1869	39.1497	7.87479	2.78897	8.11352	9.57077	22.3834	14.3641	5.26179	3.76847	3.22167	4.35937	24.157	22.1146
Il15	13.0883	-0.118229	0.409528	41.1743	8.6518e-08	4.07243e-06	2	1.00222	5.34667	15.567	32.3292	18.4874	7.87479	2.78897	12.7498	25.5221	18.3863	15.2091	3.00674	3.14039	7.51723	14.8219	17.7999	20.9507
P2rx4	93.602	-0.570549	0.165491	40.8291	1.01591e-07	4.75799e-06	2	91.2024	77.5267	113.293	177.321	153.336	54.1392	68.7945	76.4989	114.849	109.519	95.4792	45.8528	60.2955	51.5467	82.8281	109.342	109.409
Arrdc3	26.5343	0.634436	0.285545	40.5543	1.15434e-07	5.37948e-06	2	7.01557	13.3667	23.3505	33.3088	22.8373	18.7026	13.9448	32.4541	49.9807	35.9733	22.8136	15.7854	10.6773	21.4778	47.9531	54.671	26.7704
Rtp4	85.8587	0.0905174	0.450745	40.4953	1.18643e-07	5.50164e-06	2	2.00445	50.7934	104.645	150.869	135.936	35.4365	40.9049	100.839	113.786	146.291	106.464	11.2753	10.0492	52.6206	100.266	144.942	152.475
Rap2a	22.5489	-0.482719	0.279921	40.4771	1.19653e-07	5.52113e-06	3	49.109	34.7534	14.7022	19.5934	17.3999	30.5148	27.8897	23.1815	10.6342	8.79347	9.29444	44.3494	30.1477	20.4039	11.3344	11.4428	19.7868
Pgk1	127.471	0.0729261	0.159803	40.3684	1.2585e-07	5.77861e-06	4	165.367	189.807	128.86	73.4754	85.9118	123.044	111.559	157.634	139.308	91.1323	90.4095	136.807	139.433	179.34	186.581	77.5566	90.7864
Sqle	15.221	-0.992	0.353709	39.9744	1.5112e-07	6.90506e-06	3	49.109	20.05	25.0802	7.83738	7.61244	18.7026	18.5931	16.227	7.44393	5.59585	5.91464	23.3022	22.6108	13.9606	6.975	5.08568	4.65571
Tnfaip8l2	34.1241	-0.0914305	0.23941	39.9209	1.54925e-07	7.04456e-06	2	15.0334	16.04	52.7549	54.8616	44.5872	24.6087	16.7338	32.4541	47.8539	45.5662	41.4025	20.2955	18.8423	19.33	46.2094	38.1426	45.3932
Fgl2	10.5946	-2.9559	0.502423	39.8503	1.60082e-07	7.24389e-06	2	4.0089	6.68334	40.6472	57.8006	30.4498	1.9687	1.85931	0	6.38051	3.99703	5.91464	2.25505	0.628078	0	5.23125	7.62852	4.65571
Ehd1	30.0367	-0.0150364	0.302503	39.8129	1.62888e-07	7.33546e-06	3	38.0845	22.7234	12.9725	25.4715	20.6623	49.2174	88.3173	24.3406	15.9513	27.1798	24.5035	27.0606	46.4778	16.1084	6.10312	44.4997	20.9507
Casp1	57.7043	0.50071	0.208188	39.7005	1.71612e-07	7.69134e-06	2	19.0423	30.7434	55.3494	70.5364	54.3746	43.3113	42.7642	61.4309	92.5175	88.7341	64.2161	36.0809	38.9408	42.9556	61.0312	92.8136	86.1307
Shisa5	148.931	-0.146399	0.157722	39.1187	2.24774e-07	1.0026e-05	2	89.198	93.5668	182.48	239.04	204.448	108.278	117.137	143.725	199.923	186.262	160.54	103.732	94.2117	115.98	152.578	175.456	165.278
Rpsa	338.14	-0.0336632	0.119121	38.8399	2.55772e-07	1.13546e-05	4	418.93	522.637	383.122	259.613	249.036	322.866	309.575	322.223	331.787	252.612	216.307	392.379	386.268	411.3	436.809	273.355	259.556
Gvin-ps7	11.1502	-0.607275	0.500936	38.8212	2.57993e-07	1.13991e-05	2	4.0089	5.34667	25.0802	16.6544	11.9624	1.9687	0.929656	27.8178	21.2684	17.5869	5.91464	2.25505	0.628078	5.36945	13.95	24.157	4.65571
Gclc	15.6853	-0.112593	0.465241	38.6667	2.77137e-07	1.21875e-05	3	49.109	25.3967	2.5945	1.95934	4.34997	29.5304	21.3821	20.8633	8.50735	3.99703	18.5889	20.2955	17.5862	25.7734	6.975	5.08568	4.65571
Adcy7	40.8468	-0.633736	0.231837	38.6107	2.84425e-07	1.24426e-05	3	76.1691	38.7634	40.6472	26.4511	40.2372	69.8887	65.0759	27.8178	43.6002	33.5751	31.2631	60.8864	50.2462	25.7734	16.5656	24.157	23.2786
Ldha	181.084	0.0798534	0.161937	38.6018	2.85594e-07	1.24426e-05	4	241.536	252.63	125.401	111.683	145.724	203.76	199.876	234.133	162.703	106.321	159.695	213.478	213.547	241.625	235.406	101.714	129.196
Bhlhe40	8.67899	0.338056	0.484846	38.5469	2.92952e-07	1.27041e-05	3	18.04	18.7134	1.72967	0.979672	3.26248	10.8278	16.7338	5.79537	2.12684	2.39822	3.37979	17.2887	21.3547	10.7389	6.975	2.54284	4.65571
Dbp	9.09409	0.676601	0.497517	38.4098	3.12152e-07	1.34743e-05	2	0	1.33667	13.8374	11.7561	6.52495	3.93739	5.57794	3.47722	21.2684	16.7875	14.3641	4.51011	3.76847	2.14778	13.95	26.6998	4.65571
Ifi203	55.8935	-0.574516	0.479718	38.3947	3.14341e-07	1.35066e-05	2	2.00445	25.3967	130.59	192.016	127.237	3.93739	14.8745	39.4085	57.4246	77.5424	43.0924	12.7786	10.0492	27.9211	54.9281	76.2852	54.7046
Marcks	111.963	-0.137945	0.190961	38.2295	3.39315e-07	1.44535e-05	2	68.1513	60.1501	153.941	197.894	176.174	65.9513	79.9504	99.6804	106.342	128.704	114.068	78.9269	83.5344	56.9162	127.294	160.199	145.491
P2ry14	10.712	-0.367891	0.442604	38.2285	3.39465e-07	1.44535e-05	2	1.00222	2.67334	15.567	29.3902	20.6623	4.92174	4.64828	3.47722	19.1415	15.1887	12.6742	3.75842	3.14039	3.22167	13.95	8.89994	19.7868
Slc40a1	85.0986	-0.374092	0.282172	37.9614	3.84116e-07	1.62806e-05	2	70.1557	64.1601	105.51	103.845	97.8743	50.2018	43.6938	110.112	73.3759	128.704	143.641	19.5438	17.5862	53.6945	71.4937	148.756	144.327
Rbpj	21.2934	0.283624	0.300837	37.8408	4.06153e-07	1.71371e-05	3	28.0623	20.05	5.18901	17.6341	11.9624	26.5774	53.92	27.8178	10.6342	17.5869	22.8136	18.0404	39.5689	22.5517	10.4625	13.9856	15.1311
Ly9	52.5899	-0.0632635	0.22141	37.8116	4.11672e-07	1.7272e-05	2	37.0823	32.08	53.6197	90.1298	89.1743	20.6713	23.2414	55.6356	40.4099	67.9495	71.8206	39.8393	38.9408	33.2906	45.3375	82.6423	72.1636
Cd9	130.503	-0.044484	0.202742	37.8044	4.13038e-07	1.7272e-05	4	225.501	256.64	126.266	70.5364	67.4245	99.4192	105.051	157.634	105.278	75.1442	115.758	131.545	155.763	212.63	139.5	67.3852	107.081
Ifitm3	354.665	-0.146085	0.473098	37.6672	4.40084e-07	1.83212e-05	2	25.0556	45.4467	534.468	1011.02	840.631	113.2	116.207	207.474	640.178	546.794	430.079	113.504	86.6748	121.35	298.181	446.268	452.768
Mt2	31.486	0.656577	0.303807	37.6082	4.52252e-07	1.87445e-05	4	19.0423	20.05	42.3769	13.7154	10.8749	52.1705	53.92	11.5907	32.966	15.9881	16.899	76.6718	60.2955	13.9606	40.1062	26.6998	27.9343
Niban2	103.203	-0.015097	0.20749	37.534	4.68031e-07	1.93015e-05	3	223.496	151.043	64.8626	51.9226	68.512	121.075	117.137	81.1352	57.4246	77.5424	85.3398	148.082	151.995	113.832	80.2125	85.1851	75.6553
Rgs1	43.7592	0.173347	0.283765	37.5258	4.69814e-07	1.93015e-05	3	69.1535	46.7834	13.8374	38.2072	45.6747	25.5931	51.1311	28.9768	19.1415	35.1739	44.7823	88.6988	96.724	49.3989	7.84687	29.2427	53.5407
Pml	12.3061	-0.293869	0.390381	37.2939	5.22931e-07	2.13899e-05	2	3.00667	6.68334	31.9989	16.6544	13.0499	4.92174	5.57794	12.7498	20.205	20.7846	12.6742	3.00674	2.51231	7.51723	14.8219	19.0713	13.9671
Zfas1	25.2707	-0.602405	0.3729	37.2429	5.35397e-07	2.18046e-05	2	10.0222	10.6933	25.0802	92.0892	59.812	3.93739	9.29656	15.068	31.9026	34.3745	16.054	15.0337	7.53694	8.59112	19.1812	26.6998	44.2293
Hmga2	19.985	-0.158121	0.293238	37.039	5.88274e-07	2.38544e-05	3	40.089	30.7434	13.8374	13.7154	17.3999	20.6713	21.3821	13.9089	7.44393	11.1917	5.06969	38.3359	38.9408	33.2906	13.0781	10.1714	10.4754
Parp10	16.9711	-0.0415448	0.355515	36.9688	6.07624e-07	2.45328e-05	2	5.01112	10.6933	18.1615	37.2275	15.2249	3.93739	7.43725	28.9768	31.9026	24.7816	21.1237	6.01348	5.02462	10.7389	18.3094	24.157	19.7868
Aftph	24.2163	0.0264592	0.305267	36.849	6.42168e-07	2.58163e-05	2	17.0378	10.6933	21.6209	43.1056	31.5373	9.84348	6.50759	23.1815	37.2197	41.5691	26.1934	14.282	10.6773	12.8867	20.925	48.3139	36.0818
Ddx60	9.15269	-0.970544	0.45723	36.7957	6.58171e-07	2.63465e-05	2	2.00445	5.34667	13.8374	23.5121	28.2748	2.95304	0.929656	9.27259	9.57077	9.59288	9.29444	3.00674	0.628078	4.29556	5.23125	12.7142	15.1311
Tlr7	18.4164	-0.817285	0.376497	36.7132	6.83692e-07	2.72517e-05	2	7.01557	5.34667	36.323	65.638	39.1497	5.90609	7.43725	8.11352	25.5221	17.5869	15.2091	3.00674	12.5616	4.29556	20.0531	17.7999	22.1146
Bst2	272.991	0.473197	0.385761	36.6345	7.08986e-07	2.81401e-05	2	28.0623	56.1401	260.315	494.734	458.922	119.106	162.69	259.633	532.773	423.685	348.119	113.504	100.492	143.901	298.181	415.754	424.834
Ifi27l2a	305.643	0.166589	0.410826	36.5928	7.22746e-07	2.85652e-05	2	41.0912	40.1	530.143	704.384	580.721	125.012	141.308	151.839	443.446	492.434	278.833	166.874	131.896	120.276	346.134	502.211	399.227
C1qc	348.347	0.0550623	0.156154	36.4572	7.69371e-07	3.02803e-05	1	282.627	188.47	227.451	408.523	441.522	412.442	376.511	336.131	408.353	485.24	448.668	236.781	239.298	213.704	256.331	422.111	537.735
Npc2	563.68	0.0846122	0.122459	36.3352	8.1388e-07	3.1898e-05	2	417.928	368.92	729.055	809.209	685.12	404.567	426.712	438.13	628.481	567.579	481.621	517.159	488.645	509.024	714.937	742.509	652.964
Hacd4	36.7538	-0.5757	0.243098	36.321	8.19223e-07	3.19736e-05	2	25.0556	18.7134	83.0241	60.7397	55.4621	31.4991	26.96	12.7498	54.2344	39.9703	31.2631	24.0539	18.2143	20.4039	35.7469	48.3139	38.4096
S100a4	224.665	1.23117	0.226939	36.1824	8.73281e-07	3.3942e-05	4	89.198	114.953	259.45	52.9023	77.2119	304.164	312.364	296.723	246.713	156.684	183.354	389.373	365.541	380.157	316.49	143.67	130.36
Cybb	86.6955	-0.457188	0.251175	36.1713	8.77759e-07	3.39751e-05	2	47.1045	29.4067	163.454	166.544	137.024	43.3113	60.4276	98.5213	140.371	112.716	75.2004	39.0876	40.197	48.3251	89.8031	91.5422	90.7864
Trim30d	13.0184	-0.320393	0.507291	36.1266	8.9601e-07	3.45388e-05	2	0	1.33667	22.4857	35.2682	20.6623	1.9687	3.71862	24.3406	21.2684	22.3834	11.8293	3.75842	1.88423	4.29556	16.5656	19.0713	10.4754
Stmn1	22.0164	0.0302335	0.31336	36.0492	9.2854e-07	3.5646e-05	4	22.0489	26.7334	42.3769	11.7561	9.78743	25.5931	20.4524	23.1815	17.0147	7.19466	8.44949	43.5977	37.0566	27.9211	32.2594	16.5285	2.32786
Adar	21.0443	0.258728	0.345853	35.8662	1.01017e-06	3.86214e-05	2	1.00222	9.35668	29.4044	41.1462	19.5749	10.8278	8.3669	34.7722	30.8392	27.1798	29.5732	9.02021	8.79309	17.1822	27.0281	29.2427	24.4425
Lgals9	100.617	-0.241121	0.27663	35.7277	1.07667e-06	4.08307e-05	2	18.04	50.7934	177.291	195.934	163.124	62.0139	71.5835	97.3622	164.83	124.707	81.96	55.6247	47.1059	53.6945	109.856	141.128	95.4421
Pdia3	146.238	0.359847	0.154783	35.7316	1.07477e-06	4.08307e-05	4	127.283	153.717	141.833	87.1908	95.6993	140.762	150.604	230.656	206.303	117.513	114.068	121.773	118.707	185.783	244.997	138.585	110.573
Gyg	78.8917	-0.418627	0.230022	35.6968	1.09209e-06	4.12485e-05	2	37.0823	42.7734	182.48	180.26	118.537	51.1861	38.1159	40.5676	90.3906	67.1501	53.2318	63.1415	62.8078	53.6945	115.087	86.4565	58.1964
Entpd1	26.8628	-0.939076	0.269023	35.6307	1.12582e-06	4.23515e-05	1	20.0445	21.3867	42.3769	50.9429	70.687	22.64	14.8745	8.11352	15.9513	23.9822	32.953	21.0472	15.0739	7.51723	15.6937	41.9568	31.4261
Srsf2	49.6123	-0.530861	0.212357	35.4752	1.20935e-06	4.53121e-05	3	92.2047	80.2001	47.5659	35.2682	39.1497	72.8418	67.8649	52.1583	41.4733	35.1739	18.5889	57.8797	54.6428	49.3989	29.6437	35.5998	33.7539
Cd5l	219.19	-0.894183	0.165206	35.3398	1.28703e-06	4.80305e-05	1	373.83	247.284	374.473	466.324	384.972	77.7635	88.3173	107.794	143.562	160.681	141.951	112.753	108.029	148.197	230.175	292.427	267.704
Clec12a	99.9164	-0.173597	0.178315	35.1753	1.38816e-06	5.15989e-05	2	79.1757	60.1501	144.427	155.768	153.336	51.1861	72.5132	92.7259	109.532	109.519	92.0994	57.8797	63.4359	88.059	132.525	137.313	98.9339
Anpep	199.808	-0.364721	0.164224	34.9879	1.51301e-06	5.60174e-05	2	195.434	147.033	345.934	351.702	278.398	97.4505	91.1063	136.771	166.957	234.226	222.222	162.364	158.904	150.345	212.737	240.298	204.851
Tnf	9.0427	-0.198799	0.534572	34.7813	1.66367e-06	6.13529e-05	3	14.0311	8.02001	2.5945	7.83738	2.17498	6.89044	45.5531	13.9089	8.50735	3.19763	3.37979	3.75842	19.4704	4.29556	1.74375	2.54284	5.81964
Mov10	16.327	-0.375044	0.358415	34.7228	1.709e-06	6.27773e-05	2	3.00667	6.68334	32.8637	26.4511	28.2748	10.8278	5.57794	18.5452	34.0294	18.3863	15.2091	5.26179	5.02462	13.9606	21.7969	16.5285	15.1311
Gbp8	4.3304	-0.41827	0.648846	34.6553	1.76277e-06	6.44995e-05	1	0	0	6.91868	13.7154	13.0499	0	0.929656	0	4.25368	6.39525	6.75959	1.50337	1.88423	0	3.4875	8.89994	5.81964
Srxn1	56.1757	-0.306195	0.306007	34.6192	1.79222e-06	6.5322e-05	4	153.34	141.687	27.6747	17.6341	25.0123	49.2174	74.3725	91.5668	39.3465	27.9792	42.2474	39.0876	48.9901	63.3595	28.7719	38.1426	46.5571
S1pr1	21.7258	0.11511	0.324644	34.5626	1.8394e-06	6.67816e-05	3	38.0845	21.3867	8.64834	5.87803	11.9624	54.1392	30.6786	20.8633	14.8879	15.1887	22.8136	32.3224	25.1231	27.9211	9.59062	8.89994	20.9507
Cenpa	10.4352	-0.277925	0.424056	34.534	1.8637e-06	6.73088e-05	3	20.0445	5.34667	16.4319	6.8577	5.43746	15.7496	16.7338	4.6363	6.38051	4.79644	1.6899	26.309	24.495	7.51723	5.23125	5.08568	4.65571
Gm47283	18.6209	-0.670052	0.310754	34.5287	1.86829e-06	6.73088e-05	3	53.1179	29.4067	11.2428	13.7154	18.4874	14.7652	30.6786	16.227	7.44393	14.3893	13.5192	19.5438	29.5197	20.4039	9.59062	6.3571	8.1475
Clec7a	48.3364	-0.570453	0.299581	34.4946	1.89777e-06	6.8109e-05	1	78.1735	45.4467	51.8901	80.3331	70.687	12.7965	16.7338	16.227	43.6002	58.3567	73.5105	17.2887	15.0739	26.8473	56.6719	80.0994	77.9832
Uba7	13.7383	-0.909152	0.371536	34.4389	1.94685e-06	6.95546e-05	2	4.0089	14.7033	26.8099	37.2275	20.6623	2.95304	5.57794	17.3861	22.3318	14.3893	10.9843	3.75842	3.14039	10.7389	19.1812	12.7142	6.98357
Actg1	656.959	-0.42663	0.140864	34.4322	1.9529e-06	6.95546e-05	3	1216.7	890.221	574.25	579.966	663.37	913.475	816.238	551.719	492.363	430.88	479.931	613.375	773.164	524.058	548.409	526.368	573.817
Tsc22d3	26.7668	-0.167111	0.254377	34.3362	2.04081e-06	7.24101e-05	2	19.0423	10.6933	53.6197	43.1056	36.9747	18.7026	10.2262	15.068	34.0294	24.7816	26.1934	16.5371	17.5862	18.2561	44.4656	34.3283	31.4261
Calhm6	6.09518	-1.97707	0.752375	34.2117	2.16079e-06	7.63777e-05	2	0	0	15.567	28.4105	28.2748	0	0.929656	2.31815	2.12684	3.19763	0.844949	0	0	0	0.871875	15.257	5.81964
Tent5a	16.2901	-0.227686	0.373014	34.179	2.19336e-06	7.72375e-05	2	4.0089	6.68334	28.5395	27.4308	27.1873	4.92174	7.43725	22.0224	35.0928	16.7875	16.054	3.75842	5.6527	13.9606	19.1812	11.4428	26.7704
Sp140	17.0817	-0.203132	0.471856	34.169	2.20352e-06	7.73047e-05	2	3.00667	1.33667	22.4857	51.9226	26.0998	5.90609	6.50759	23.1815	29.7757	14.3893	16.054	3.00674	3.76847	5.36945	24.4125	36.8712	16.295
Pirb	124.767	0.186128	0.163328	33.9758	2.40758e-06	8.41486e-05	2	91.2024	61.4867	141.833	172.422	125.062	87.607	97.6139	114.748	156.323	184.663	133.502	108.243	119.963	74.0984	139.5	161.47	151.311
Sqstm1	320.807	0.512744	0.132749	33.8694	2.52784e-06	8.76975e-05	3	372.828	263.324	172.967	218.467	253.386	270.696	538.271	383.653	277.552	303.774	346.429	260.083	378.731	372.64	268.537	366.169	406.211
Pkm	190.475	0.198515	0.192712	33.8703	2.5268e-06	8.76975e-05	4	224.498	358.227	118.482	93.0688	116.362	206.713	197.087	274.701	192.479	123.908	164.765	195.438	197.845	259.881	238.022	160.199	116.393
Hmox1	177.081	-0.00295502	0.375352	33.8429	2.55876e-06	8.84426e-05	4	519.152	418.377	38.0527	54.8616	84.8244	247.071	251.007	171.543	78.693	72.746	101.394	193.935	197.217	253.438	98.5218	113.156	116.393
Ccl5	13.2606	-1.42465	0.582942	33.7514	2.66826e-06	9.1888e-05	1	1.00222	2.67334	6.91868	41.1462	47.8496	3.93739	7.43725	12.7498	26.5855	23.9822	17.7439	3.00674	0.628078	0	4.35937	11.4428	13.9671
Tlr3	5.9146	-0.10478	0.571729	33.7372	2.68568e-06	9.21493e-05	2	0	2.67334	12.9725	13.7154	6.52495	1.9687	0	5.79537	11.6976	9.59288	3.37979	0.751684	0.628078	5.36945	6.10312	8.89994	10.4754
Rnf144b	13.667	0.026548	0.374503	33.6921	2.74175e-06	9.373e-05	1	4.0089	2.67334	22.4857	27.4308	22.8373	10.8278	4.64828	5.79537	10.6342	13.5899	20.2788	5.26179	6.28078	7.51723	21.7969	24.157	22.1146
Msr1	74.8609	-0.781458	0.236782	33.4138	3.11434e-06	0.00010608	4	138.307	184.46	45.8362	43.1056	72.8619	97.4505	77.1614	117.066	64.8686	53.5602	54.9217	54.873	62.1797	78.394	67.1343	26.6998	33.7539
Ube2c	6.8402	0.298104	0.627388	33.3055	3.2727e-06	0.00011107	4	5.01112	4.01	12.9725	0.979672	2.17498	10.8278	9.29656	3.47722	5.3171	0.799406	0.844949	18.0404	27.6354	9.66501	5.23125	0	0
Id3	32.3593	1.45788	0.325358	33.2482	3.35963e-06	0.000113609	3	25.0556	16.04	5.18901	3.91869	10.8749	77.7635	48.3421	54.4765	45.727	23.1828	22.8136	48.8595	52.1305	44.0295	38.3625	8.89994	24.4425
H2-T22	78.1083	0.12175	0.447666	33.2213	3.40115e-06	0.000114599	2	9.02002	14.7033	83.8889	197.894	146.811	27.5618	34.3973	82.2943	127.61	116.713	72.6656	24.0539	26.3793	24.6995	96.7781	127.142	115.229
Akirin1	54.983	-0.227981	0.224853	33.1908	3.4489e-06	0.000115792	4	84.1869	92.2301	34.5934	45.0649	41.3247	77.7635	86.458	46.363	48.9173	22.3834	35.4878	60.8864	81.6502	61.2117	34.875	39.414	41.9014
Isg20	7.94156	-0.763958	0.675562	33.1083	3.58156e-06	0.000119816	2	0	0	12.9725	43.1056	13.0499	0	0.929656	5.79537	20.205	6.39525	3.37979	1.50337	0.628078	2.14778	7.84687	8.89994	8.1475
mt-Nd4	688.716	0.270827	0.178998	32.992	3.77715e-06	0.00012591	4	877.949	870.171	462.686	317.414	366.485	1074.91	974.279	984.054	692.286	405.299	639.626	696.06	624.938	894.55	750.684	593.753	483.03
Srsf3	37.5684	-0.63537	0.248808	32.8505	4.02968e-06	0.000133851	4	66.1468	85.5467	25.945	22.5325	25.0123	59.0609	48.3421	44.0448	30.8392	27.1798	28.7283	36.0809	35.1724	41.8817	26.1562	12.7142	23.2786
Slc7a8	46.7396	0.289981	0.254554	32.823	4.08063e-06	0.000135065	3	45.1001	45.4467	25.945	30.3698	22.8373	75.7948	83.669	81.1352	58.4881	17.5869	24.5035	80.4302	54.6428	48.3251	41.85	30.5141	27.9343
Serinc3	170.4	-0.172743	0.167345	32.4594	4.81779e-06	0.000158902	2	121.269	84.2101	261.18	304.678	209.886	132.887	147.815	119.385	177.591	203.049	174.904	139.813	139.433	122.423	172.631	211.056	174.589
Ccrl2	27.2972	1.26084	0.374366	32.4283	4.88665e-06	0.000160608	1	3.00667	4.01	11.2428	23.5121	38.0622	8.85913	34.3973	23.1815	56.3612	50.3626	32.108	12.027	21.3547	13.9606	29.6437	49.5854	52.3768
Ly6e	517.076	0.918737	0.498534	32.4034	4.94265e-06	0.00016188	2	19.0423	44.11	486.037	945.383	852.594	223.447	198.017	397.562	890.082	993.662	709.757	205.21	178.374	264.177	609.44	958.65	814.75
Cxcl2	4.16486	0.100377	0.960396	32.362	5.03677e-06	0.000164388	3	4.0089	1.33667	0	0	4.34997	1.9687	34.3973	6.95444	1.06342	0.799406	3.37979	0	4.39655	0	0	0	8.1475
Mafg	18.0136	-0.335581	0.35904	32.2967	5.18932e-06	0.000168779	4	45.1001	40.1	9.51318	4.89836	8.69993	23.6244	23.2414	18.5452	11.6976	13.5899	6.75959	23.3022	18.2143	31.1428	9.59062	8.89994	9.31143
Ptma	218.914	-0.314135	0.143361	32.219	5.37645e-06	0.00017426	4	278.618	376.94	231.776	188.097	190.311	252.977	215.68	275.86	197.796	127.106	155.471	199.196	194.704	252.364	262.434	162.742	159.458
Cxcl10	38.3399	-0.497565	0.64169	32.0629	5.77337e-06	0.00018648	2	4.0089	13.3667	43.2417	135.195	44.5872	1.9687	20.4524	55.6356	126.547	40.7697	16.054	1.50337	3.14039	8.59112	34.0031	58.4853	44.2293
Piezo1	32.726	-0.414856	0.268318	31.9176	6.16864e-06	0.000198562	3	91.2024	40.1	21.6209	20.5731	20.6623	40.3583	37.1862	38.2494	25.5221	23.9822	19.4338	47.3561	39.5689	31.1428	21.7969	17.7999	19.7868
Grn	696.578	-0.217805	0.136904	31.8172	6.45759e-06	0.000207151	2	507.126	483.874	1014.45	1166.79	940.68	521.705	505.733	527.379	724.188	833.781	667.509	617.885	601.699	560.571	707.962	781.923	678.57
Ykt6	33.5233	-0.302463	0.250755	31.7921	6.53177e-06	0.000208816	3	77.1713	37.4267	21.6209	25.4715	18.4874	50.2018	50.2014	28.9768	26.5855	22.3834	27.8833	45.8528	39.5689	30.0689	19.1812	26.6998	22.1146
Spp1	595.588	0.0125983	0.110085	31.6832	6.86409e-06	0.000218694	4	793.762	876.854	605.384	566.25	548.096	442.957	488.069	463.63	440.256	341.347	368.398	777.993	845.393	810.787	738.478	455.168	562.177
Ets2	7.51852	0.2703	0.535932	31.2912	8.20535e-06	0.000260541	3	14.0311	6.68334	0	2.93902	2.17498	14.7652	24.1711	9.27259	5.3171	6.39525	4.22474	10.5236	13.1896	5.36945	2.61562	3.81426	2.32786
Ptpro	19.744	0.442718	0.335648	31.2112	8.50951e-06	0.000269286	2	5.01112	6.68334	25.0802	31.3495	21.7498	7.87479	12.0855	10.4317	37.2197	25.581	24.5035	15.7854	6.90886	21.4778	23.5406	39.414	20.9507
C3	5.9568	-0.103367	0.748059	30.9366	9.64105e-06	0.000303535	1	0	0	0.864834	12.7357	20.6623	1.9687	2.78897	1.15907	12.761	11.1917	10.9843	0.751684	0	3.22167	1.74375	7.62852	12.8032
Ctsh	64.2681	-0.752596	0.250275	30.9331	9.6566e-06	0.000303535	1	102.227	58.8134	55.3494	109.723	132.674	28.5461	23.2414	37.0904	55.2978	80.7401	87.8747	32.3224	23.2389	44.0295	52.3125	72.4709	96.606
Pgd	88.5185	0.161005	0.271615	30.8894	9.85026e-06	0.000308586	4	145.323	184.46	52.7549	27.4308	31.5373	92.5287	92.0359	151.839	60.6149	63.9525	98.859	73.6651	72.8571	143.901	75.8531	53.3996	83.8028
H2aw	19.5021	0.55274	0.314778	30.8515	1.00216e-05	0.000312906	2	10.0222	6.68334	21.6209	24.4918	16.3124	10.8278	15.8041	12.7498	36.1562	23.9822	19.4338	12.7786	8.79309	10.7389	41.85	26.6998	32.59
Apobec1	70.0273	0.174069	0.176758	30.7251	1.06135e-05	0.000330288	2	52.1157	36.09	86.4834	111.683	79.3869	52.1705	41.8345	39.4085	78.693	74.3448	59.9914	79.6786	71.6009	54.7684	88.0593	113.156	70.9996
Fgd2	11.9617	-0.24151	0.394876	30.6275	1.10948e-05	0.000344121	2	3.00667	5.34667	19.8912	28.4105	22.8373	5.90609	5.57794	4.6363	15.9513	13.5899	9.29444	1.50337	6.28078	7.51723	19.1812	21.6141	12.8032
Plaur	13.0855	-1.03093	0.471232	30.5695	1.13906e-05	0.000352132	3	47.1045	30.7434	7.78351	3.91869	6.52495	12.7965	23.2414	5.79537	3.19026	11.1917	8.44949	18.7921	18.8423	10.7389	0	6.3571	6.98357
Nfkbia	32.055	0.492656	0.323834	30.5331	1.15805e-05	0.000356824	3	28.0623	14.7033	12.1077	24.4918	14.1374	31.4991	118.066	54.4765	36.1562	23.9822	28.7283	15.0337	58.4113	17.1822	12.2062	25.4284	30.2621
Jag1	2.72134	-1.32319	0.909779	30.4463	1.20462e-05	0.000369957	4	9.02002	12.03	0	0.979672	0	3.93739	6.50759	2.31815	0	0	0.844949	3.00674	4.39655	3.22167	0	0	0
Gm28661	107.234	0.176797	0.173457	30.435	1.21082e-05	0.000370645	4	109.242	143.023	89.0779	69.5567	63.0745	164.386	146.886	133.294	108.469	64.7519	75.2004	105.236	120.591	138.532	124.678	88.9994	77.9832
Ranbp1	30.2722	-0.203792	0.257924	30.224	1.33242e-05	0.000406539	4	41.0912	66.8334	14.7022	15.6748	27.1873	31.4991	40.9049	46.363	22.3318	22.3834	23.6586	28.564	36.4285	39.7339	21.7969	20.3427	15.1311
Hsd17b12	27.1502	-0.35857	0.276414	30.1811	1.35858e-05	0.000413177	4	36.0801	62.8234	23.3505	19.5934	19.5749	32.4835	33.4676	37.0904	23.3952	9.59288	13.5192	22.5505	41.4532	30.0689	28.7719	11.4428	16.295
Cept1	30.6643	0.232404	0.269489	30.1169	1.39874e-05	0.000424014	2	12.0267	22.7234	40.6472	37.2275	44.5872	9.84348	11.1559	39.4085	43.6002	35.1739	29.5732	24.0539	18.2143	22.5517	39.2344	47.0425	44.2293
Hnrnpab	75.3827	-0.15223	0.177663	30.063	1.43334e-05	0.0004331	3	106.236	104.26	51.0252	66.6177	59.812	89.5757	109.699	97.3622	53.171	55.159	59.1464	83.437	94.2117	69.8029	44.4656	57.2139	80.3111
Fabp5	907.621	-0.603198	0.105293	29.8863	1.55287e-05	0.000467707	2	1271.82	1132.16	1559.3	1534.17	1370.24	420.317	420.204	482.175	628.481	646.72	677.649	777.993	738.62	700.176	1000.91	1132.83	935.798
Gbp5	4.33517	0.197768	0.736032	29.4896	1.85835e-05	0.000557923	2	0	0	3.45934	5.87803	10.8749	0	1.85931	5.79537	10.6342	5.59585	6.75959	0	0	1.07389	9.59062	6.3571	5.81964
Slc9a9	11.3147	-1.33783	0.408695	29.4014	1.93396e-05	0.000578767	1	19.0423	2.67334	32.8637	26.4511	17.3999	12.7965	10.2262	0	4.25368	3.99703	6.75959	15.0337	10.0492	1.07389	10.4625	7.62852	11.6393
H2bc4	87.7958	1.43439	0.189098	29.3079	2.01757e-05	0.000601866	1	40.089	17.3767	33.7285	53.882	58.7246	86.6226	90.1766	76.4989	116.976	153.486	131.812	90.2021	86.6748	79.4679	93.2906	118.242	165.278
Gbp7	11.3714	-0.724778	0.629109	29.2594	2.06227e-05	0.000613247	2	1.00222	0	24.2154	32.3292	10.8749	3.93739	7.43725	20.8633	30.8392	10.3923	9.29444	0	0.628078	2.14778	9.59062	21.6141	8.1475
Helz2	17.0647	-0.762461	0.430461	29.1752	2.1423e-05	0.000635029	2	1.00222	12.03	16.4319	54.8616	35.8872	5.90609	7.43725	33.6131	21.2684	21.584	16.899	3.75842	3.76847	8.59112	16.5656	16.5285	13.9671
Eng	26.5393	-0.067373	0.272765	29.0787	2.23775e-05	0.000661231	2	11.0245	21.3867	25.945	44.0852	29.3623	19.687	21.3821	25.4996	39.3465	36.7727	35.4878	11.2753	11.9335	15.0345	34.0031	44.4997	24.4425
Bcl2a1b	80.6646	-0.257982	0.229895	28.9997	2.31907e-05	0.000683105	4	147.327	132.33	49.2956	46.0446	44.5872	120.09	130.152	83.4533	46.7904	74.3448	90.4095	74.4168	74.7413	99.8718	52.3125	45.7711	59.3603
Iigp1	20.3928	-0.880977	0.840668	28.8643	2.46528e-05	0.000723895	2	0	1.33667	45.8362	71.5161	35.8872	2.95304	3.71862	19.7043	59.5515	27.9792	5.91464	0	0.628078	3.22167	15.6937	31.7855	20.9507
Cyp27a1	5.7966	-0.469606	0.561359	28.8237	2.51092e-05	0.000734993	1	1.00222	1.33667	10.378	13.7154	14.1374	2.95304	2.78897	1.15907	5.3171	4.79644	8.44949	0.751684	1.88423	0	7.84687	12.7142	9.31143
Ly86	18.1895	-0.897064	0.359121	28.7558	2.58904e-05	0.000753153	2	15.0334	5.34667	26.8099	42.1259	40.2372	6.89044	7.43725	16.227	25.5221	25.581	20.2788	6.76516	5.6527	8.59112	9.59062	34.3283	12.8032
Mcl1	184.982	0.0297897	0.164729	28.7568	2.58789e-05	0.000753153	2	140.311	105.597	217.938	256.674	246.861	102.372	156.182	216.747	194.606	217.439	214.617	118.766	153.879	156.788	183.094	242.841	219.982
Gsn	85.517	0.00440648	0.165418	28.7331	2.61569e-05	0.000758551	4	85.1891	120.3	86.4834	69.5567	67.4245	90.56	97.6139	107.794	74.4393	51.162	71.8206	90.9538	104.261	128.867	95.0343	48.3139	64.0161
Tor3a	79.9541	-0.667749	0.27333	28.6707	2.69037e-05	0.000775407	2	33.0734	57.4767	148.752	198.873	118.537	43.3113	32.538	125.18	112.722	79.9406	59.9914	32.3224	40.197	50.4728	66.2625	83.9137	75.6553
Myc	3.84761	-0.747312	0.737311	28.6728	2.68783e-05	0.000775407	3	14.0311	10.6933	0.864834	1.95934	0	7.87479	2.78897	1.15907	0	0.799406	0.844949	7.51684	5.6527	7.51723	0	2.54284	1.16393
Nampt	39.832	-0.220481	0.239274	28.641	2.72671e-05	0.000783468	2	20.0445	40.1	63.9977	56.821	50.0246	14.7652	25.1007	66.0672	44.6636	41.5691	42.2474	21.0472	22.6108	41.8817	40.1062	54.671	31.4261
Cfl1	419.35	-0.396569	0.107146	28.5251	2.87303e-05	0.000822988	4	583.295	612.194	468.74	406.564	392.585	467.565	413.697	428.857	403.036	290.185	350.654	429.212	384.384	469.29	411.525	292.427	324.736
Tnfaip3	6.55084	-0.312217	0.542075	28.5005	2.90506e-05	0.000829626	3	22.0489	9.35668	2.5945	3.91869	3.26248	2.95304	21.3821	8.11352	2.12684	2.39822	1.6899	2.25505	8.79309	6.44334	1.74375	7.62852	4.65571
Ehd4	68.1274	-0.148513	0.208259	28.477	2.93604e-05	0.000835925	2	28.0623	65.4967	80.4296	101.886	108.749	36.4209	45.5531	64.9081	105.278	71.9466	76.8903	51.8662	41.4532	55.8423	76.725	82.6423	64.0161
Lrrc25	52.9199	0.107727	0.241117	28.4521	2.96925e-05	0.000842818	1	41.0912	28.07	37.1879	62.699	70.687	46.2644	34.3973	45.2039	82.9467	87.9347	55.7666	32.3224	28.8916	25.7734	58.4156	71.1995	90.7864
Gclm	47.2217	0.371747	0.530468	28.4369	2.98955e-05	0.000846015	4	115.256	122.973	6.05384	5.87803	7.61244	61.0296	66.9352	121.703	17.0147	26.3804	30.4182	30.0674	30.7758	85.9112	22.6687	24.157	27.9343
Dot1l	10.7271	-0.03162	0.417379	28.3968	3.04418e-05	0.00085888	3	24.0534	14.7033	7.78351	11.7561	1.08749	7.87479	14.8745	10.4317	3.19026	11.9911	4.22474	10.5236	27.0074	13.9606	1.74375	10.1714	6.98357
Mapk14	23.6166	0.0160257	0.272769	28.3827	3.06351e-05	0.00086174	2	9.02002	24.06	31.134	21.5528	26.0998	16.7339	13.0152	38.2494	38.2831	31.9763	27.0384	10.5236	10.6773	20.4039	30.5156	25.4284	26.7704
Snw1	24.0582	-0.108839	0.269456	28.2554	3.2444e-05	0.000909889	2	14.0311	21.3867	33.7285	30.3698	39.1497	12.7965	11.1559	20.8633	20.205	33.5751	23.6586	12.7786	11.9335	18.2561	24.4125	45.7711	34.9178
Insig1	20.7011	-0.143179	0.367103	28.2243	3.29019e-05	0.000919977	4	25.0556	17.3767	31.134	19.5934	6.52495	38.3896	41.8345	17.3861	10.6342	5.59585	5.91464	30.8191	41.4532	17.1822	12.2062	20.3427	10.4754
Cpeb2	10.5331	-0.445889	0.40639	28.1991	3.32775e-05	0.000924985	3	28.0623	9.35668	9.51318	2.93902	9.78743	18.7026	15.8041	6.95444	9.57077	1.59881	10.1394	12.7786	15.0739	7.51723	6.975	3.81426	10.4754
Hmgcs1	36.2777	-0.658999	0.282112	28.199	3.32785e-05	0.000924985	4	52.1157	54.8034	89.9428	23.5121	16.3124	51.1861	47.4124	35.9313	23.3952	19.1858	14.3641	45.1011	43.3374	31.1428	27.9	17.7999	23.2786
Top2a	4.74718	-0.14741	0.647936	28.1512	3.40027e-05	0.000942317	4	4.0089	9.35668	6.91868	0.979672	1.08749	8.85913	4.64828	4.6363	2.12684	0	1.6899	14.282	11.3054	6.44334	4.35937	0	0
Tap2	24.8556	-0.00854608	0.313959	28.0476	3.56279e-05	0.000984444	2	10.0222	18.7134	27.6747	45.0649	36.9747	3.93739	11.1559	23.1815	46.7904	35.9733	27.0384	16.5371	15.702	15.0345	22.6687	38.1426	27.9343
Gm43814	9.03696	0.941986	0.555519	27.9674	3.69375e-05	0.00101763	1	0	4.01	1.72967	13.7154	11.9624	0.984348	13.9448	3.47722	15.9513	17.5869	12.6742	1.50337	4.39655	4.29556	6.10312	20.3427	20.9507
mt-Rnr1	932.293	0.437221	0.15548	27.8943	3.81725e-05	0.00104857	2	426.948	739.177	648.626	901.298	788.432	1082.78	848.776	1080.26	1296.31	1225.49	1203.21	619.388	639.384	678.698	910.237	1421.45	1338.52
Gdf15	28.6924	2.16657	0.317539	27.8858	3.83186e-05	0.0010495	3	18.04	5.34667	6.05384	6.8577	11.9624	29.5304	58.5683	22.0224	18.0781	22.3834	34.6429	35.3292	58.4113	19.33	25.2844	49.5854	66.3439
Ccr1	11.2921	-1.40485	0.485641	27.8065	3.97107e-05	0.00108446	3	44.0979	20.05	6.91868	4.89836	7.61244	26.5774	7.43725	11.5907	3.19026	5.59585	11.8293	10.5236	13.8177	10.7389	3.4875	1.27142	2.32786
Cd47	96.7459	0.0378487	0.204001	27.7878	4.00454e-05	0.00109042	2	48.1068	57.4767	121.077	155.768	144.636	51.1861	76.2318	93.885	133.991	105.522	88.7196	59.3831	81.0221	80.5418	105.497	132.228	109.409
Ms4a6c	32.8461	-0.873068	0.296616	27.705	4.15639e-05	0.00112849	2	16.0356	29.4067	58.8087	68.577	69.5995	19.687	25.1007	20.8633	46.7904	26.3804	25.3485	12.7786	8.16502	13.9606	33.1312	40.6854	43.0653
Cyp51	11.6374	-1.49222	0.386702	27.686	4.19208e-05	0.00113489	3	38.0845	21.3867	16.4319	12.7357	8.69993	9.84348	18.5931	11.5907	6.38051	5.59585	4.22474	9.02021	18.2143	5.36945	4.35937	3.81426	3.49178
Ccnb1	3.43722	0.952005	0.856294	27.2304	5.1441e-05	0.00138861	4	4.0089	1.33667	5.18901	0	0	5.90609	5.57794	0	4.25368	0	0	9.02021	11.9335	8.59112	2.61562	0	0
Stab1	47.4134	-0.771169	0.220983	27.2145	5.18092e-05	0.00139453	3	104.231	60.1501	91.6724	41.1462	35.8872	55.1235	48.3421	45.2039	27.6489	26.3804	23.6586	48.8595	61.5517	42.9556	34.875	29.2427	29.0982
Rn18s	194.764	-0.0274377	0.371425	27.1636	5.30054e-05	0.00142264	1	42.0934	84.2101	148.752	176.341	235.986	115.169	97.6139	136.771	592.324	247.017	784.112	111.249	69.0886	75.1723	87.1875	158.927	148.983
Epb41l2	16.4199	-0.390911	0.331421	27.1018	5.44968e-05	0.00145849	3	29.0645	24.06	15.567	10.7764	8.69993	22.64	31.6083	18.5452	8.50735	13.5899	6.75959	23.3022	22.6108	18.2561	9.59062	5.08568	10.4754
Eef1e1	10.4465	-0.124857	0.433278	27.0349	5.61575e-05	0.00149865	3	15.0334	20.05	1.72967	4.89836	7.61244	22.64	14.8745	15.068	5.3171	1.59881	10.1394	14.282	10.0492	15.0345	3.4875	7.62852	8.1475
Tnfaip2	89.7173	0.232672	0.211344	26.9914	5.72628e-05	0.00152381	2	70.1557	38.7634	82.1593	71.5161	105.487	63.9826	137.589	112.43	91.454	124.707	136.882	39.8393	65.9482	56.9162	66.2625	128.413	132.688
Irf9	19.0102	-0.0108476	0.313363	26.9549	5.82077e-05	0.00154456	2	6.01335	18.7134	31.134	17.6341	22.8373	14.7652	11.1559	17.3861	27.6489	22.3834	24.5035	7.51684	5.02462	23.6256	21.7969	25.4284	25.6064
Srm	10.9718	-0.635433	0.440486	26.9463	5.84326e-05	0.00154615	4	29.0645	28.07	4.32417	0.979672	8.69993	12.7965	15.8041	17.3861	6.38051	4.79644	8.44949	10.5236	8.16502	16.1084	5.23125	5.08568	4.65571
Dhrs3	140.471	-0.298291	0.161461	26.833	6.14768e-05	0.00161757	2	109.242	105.597	230.046	212.589	234.898	103.357	76.2318	89.2487	127.61	150.288	120.828	119.518	114.938	124.571	139.5	194.527	135.016
mt-Nd2	309.069	0.3043	0.187661	26.8368	6.13708e-05	0.00161757	4	328.73	395.654	189.399	140.093	197.923	517.767	436.938	442.766	303.074	187.061	290.662	290.902	245.579	444.59	323.465	266.998	252.572
Snx20	31.5724	0.427343	0.249502	26.821	6.18087e-05	0.00162174	2	15.0334	13.3667	31.134	39.1869	31.5373	15.7496	29.749	31.295	39.3465	55.159	43.0924	24.8056	19.4704	21.4778	37.4906	45.7711	43.0653
C1qa	65.1705	0.393581	0.226219	26.804	6.22813e-05	0.00162958	1	32.0712	45.4467	19.8912	44.0852	57.6371	107.294	80.8801	66.0672	80.8199	124.707	125.052	48.8595	35.8005	38.66	34.0031	57.2139	109.409
Myh9	52.8163	-0.441393	0.213037	26.6731	6.60403e-05	0.00172312	3	87.1935	76.1901	33.7285	58.7803	51.1121	74.8105	53.92	49.8402	43.6002	37.5721	30.4182	76.6718	75.9974	38.66	40.9781	38.1426	30.2621
Pik3ip1	3.03741	-0.166259	0.869582	26.6623	6.63603e-05	0.00172666	2	0	0	7.78351	5.87803	3.26248	0.984348	0	1.15907	12.761	2.39822	0	1.50337	0.628078	1.07389	7.84687	6.3571	0
Itga5	31.584	-0.0986153	0.262545	26.6357	6.71574e-05	0.00174256	3	62.1379	38.7634	11.2428	18.6138	30.4498	27.5618	60.4276	38.2494	25.5221	27.9792	27.8833	33.8258	40.8251	25.7734	19.1812	22.8856	25.6064
Chst11	6.8871	-1.11324	0.678826	26.5547	6.96372e-05	0.00180191	3	40.089	8.02001	0	0.979672	5.43746	13.7809	7.43725	2.31815	1.06342	7.99406	4.22474	8.26853	7.53694	4.29556	0.871875	1.27142	3.49178
Evi2a	70.7689	-0.545338	0.207052	26.5186	7.07698e-05	0.00182617	2	55.1223	49.4567	109.834	140.093	123.974	48.2331	54.8497	34.7722	101.025	65.5513	48.1621	55.6247	52.1305	41.8817	74.1093	87.728	60.5243
Atp13a2	70.8039	-0.114837	0.179205	26.497	7.14592e-05	0.0018389	2	52.1157	37.4267	86.4834	114.622	93.5243	68.9044	48.3421	49.8402	86.1369	81.5395	69.2858	67.6516	55.2709	53.6945	72.3656	96.6279	69.8357
Trp53inp1	20.2657	1.36404	0.377669	26.4127	7.42039e-05	0.0019043	2	1.00222	2.67334	19.0264	21.5528	8.69993	20.6713	5.57794	22.0224	51.0441	30.3774	26.1934	19.5438	16.33	20.4039	36.6187	24.157	18.6229
Ptp4a1	50.927	0.241966	0.201934	26.4011	7.45894e-05	0.00190896	3	70.1557	50.7934	30.2692	27.4308	45.6747	63.9826	73.4428	47.522	37.2197	45.5662	42.2474	69.9067	82.2782	54.7684	40.1062	48.3139	36.0818
Cyba	552.269	-0.0815045	0.0966814	26.244	8.00193e-05	0.00204234	2	547.215	521.3	593.276	676.953	619.87	409.489	473.195	535.492	559.358	645.121	562.736	441.99	442.795	486.472	576.309	692.924	604.079
Stard3	24.5787	-0.155597	0.260987	26.1943	8.18155e-05	0.00208251	2	15.0334	22.7234	34.5934	37.2275	40.2372	10.8278	14.8745	17.3861	35.0928	23.1828	21.1237	9.02021	15.0739	24.6995	32.2594	33.0569	31.4261
Slamf9	21.6815	-0.410695	0.471813	26.156	8.32284e-05	0.00211274	1	3.00667	6.68334	4.32417	33.3088	52.1996	15.7496	14.8745	27.8178	55.2978	52.7608	34.6429	9.7719	5.6527	2.14778	9.59062	13.9856	26.7704
Mx1	25.1878	-1.17873	0.831318	26.0941	8.55646e-05	0.00216617	2	0	2.67334	55.3494	97.9672	44.5872	3.93739	4.64828	37.0904	69.1222	27.1798	8.44949	0.751684	0	8.59112	28.7719	21.6141	17.4589
Vcpip1	19.4298	0.286124	0.302602	26.0198	8.84516e-05	0.00223322	2	8.0178	9.35668	17.2967	30.3698	31.5373	9.84348	9.29656	15.068	27.6489	21.584	23.6586	15.0337	12.5616	11.8128	28.7719	30.5141	27.9343
Ctla2b	30.9054	-0.268401	0.261876	25.9107	9.28651e-05	0.00233835	3	34.0756	22.7234	25.945	31.3495	26.0998	66.9357	52.0607	30.1359	25.5221	21.584	16.899	51.8662	31.4039	23.6256	16.5656	24.157	24.4425
Cxcl14	35.5406	0.734707	0.340649	25.84	9.58418e-05	0.00240684	4	43.0957	56.1401	9.51318	7.83738	8.69993	53.1548	44.6235	44.0448	51.0441	19.9852	32.953	45.8528	37.6847	60.1378	54.0562	19.0713	16.295
Gbp4	5.93247	-1.73491	0.766972	25.8162	9.6867e-05	0.00242608	2	0	1.33667	7.78351	25.4715	19.5749	0	1.85931	11.5907	5.3171	9.59288	4.22474	0	0	0	4.35937	5.08568	4.65571
Cxcr4	63.3434	0.542231	0.194917	25.773	9.87522e-05	0.0024667	1	43.0957	36.09	54.4846	53.882	59.812	68.9044	56.709	37.0904	45.727	77.5424	89.5646	76.6718	64.692	36.5123	63.6468	116.971	95.4421
Rnf128	41.4417	0.35011	0.312513	25.6946	0.000102266	0.00254768	4	61.1357	90.8934	21.6209	11.7561	16.3124	37.4052	26.96	74.1807	35.0928	21.584	43.9373	39.8393	36.4285	71.9506	55.8	30.5141	29.0982
Ppp1r14b	41.8992	0.170637	0.243278	25.4466	0.000114217	0.00283785	4	61.1357	70.8434	20.756	14.6951	30.4498	44.2957	51.1311	61.4309	34.0294	33.5751	42.2474	38.3359	40.197	63.3595	34.875	26.6998	44.2293
Inf2	11.5827	-0.634128	0.449045	25.434	0.000114861	0.0028463	3	44.0979	20.05	2.5945	6.8577	6.52495	14.7652	20.4524	8.11352	7.44393	2.39822	10.1394	9.02021	14.4458	12.8867	6.10312	6.3571	4.65571
Axl	12.8877	-0.59028	0.395242	25.4222	0.00011547	0.00285384	1	14.0311	5.34667	19.8912	19.5934	21.7498	5.90609	5.57794	8.11352	17.0147	21.584	16.054	1.50337	4.39655	7.51723	6.975	22.8856	20.9507
AW112010	25.2872	-0.390967	0.749618	25.4117	0.000116008	0.00285656	2	0	4.01	22.4857	87.1908	40.2372	8.85913	10.2262	25.4996	76.5662	43.1679	14.3641	0	1.88423	7.51723	21.7969	38.1426	27.9343
Lcp1	183.547	-0.169244	0.129157	25.4023	0.000116495	0.00285656	3	227.505	185.797	142.698	171.443	205.536	246.087	237.992	175.02	152.069	152.687	173.214	217.237	226.108	138.532	150.834	162.742	154.802
Snord3b1	8.07125	2.43055	0.706604	25.4066	0.000116274	0.00285656	4	0	5.34667	2.5945	0	0	10.8278	12.0855	33.6131	19.1415	3.19763	7.60454	8.26853	9.42117	11.8128	9.59062	2.54284	1.16393
Phgdh	7.93733	1.27229	0.50453	25.2726	0.00012342	0.00301848	4	13.0289	9.35668	1.72967	0.979672	2.17498	4.92174	6.50759	10.4317	5.3171	3.19763	3.37979	10.5236	21.9827	25.7734	6.10312	2.54284	6.98357
Fdps	23.8151	-0.458593	0.313099	25.1381	0.000131034	0.00319634	4	32.0712	36.09	44.9714	16.6544	9.78743	27.5618	36.2566	31.295	15.9513	11.9911	10.9843	25.5573	33.2881	35.4384	11.3344	13.9856	11.6393
Selenow	95.0347	-0.175421	0.191788	25.0344	0.000137217	0.00333847	2	64.1424	57.4767	122.806	156.748	142.461	62.0139	66.0056	83.4533	142.498	101.525	83.6499	72.1617	65.3201	84.8373	120.319	101.714	88.4586
Hyou1	18.057	0.0220441	0.30693	24.9617	0.00014173	0.00343933	4	17.0378	37.4267	19.8912	10.7764	9.78743	14.7652	11.1559	33.6131	17.0147	14.3893	11.8293	14.282	15.702	33.2906	24.4125	7.62852	13.9671
Psat1	5.53362	-0.301227	0.597442	24.9057	0.0001453	0.00351685	4	14.0311	22.7234	2.5945	0.979672	1.08749	2.95304	4.64828	2.31815	1.06342	1.59881	1.6899	11.2753	8.79309	11.8128	5.23125	1.27142	0
Bambi	3.50384	-0.914928	0.771058	24.8104	0.000151584	0.00365951	4	12.0267	9.35668	0.864834	1.95934	1.08749	3.93739	1.85931	6.95444	0	3.99703	0	2.25505	6.28078	6.44334	0	2.54284	0
Colec12	52.3686	-0.0101774	0.222917	24.7886	0.000153061	0.00368565	4	80.178	86.8834	55.3494	27.4308	26.0998	57.0922	52.0607	74.1807	42.5368	24.7816	45.6272	56.3763	57.7832	63.3595	60.1594	41.9568	38.4096
Nabp1	13.7243	0.456024	0.343043	24.7403	0.000156377	0.00375586	2	4.0089	8.02001	15.567	17.6341	15.2249	6.89044	8.3669	11.5907	15.9513	23.9822	17.7439	6.01348	9.42117	9.66501	19.1812	25.4284	18.6229
Lgmn	279.442	0.458326	0.145818	24.6865	0.000160153	0.00383671	1	207.46	114.953	262.045	317.414	289.273	329.757	286.334	188.929	241.396	255.011	276.298	356.298	350.468	227.665	320.85	372.526	353.834
Cebpa	73.6672	0.119256	0.222445	24.6047	0.000166075	0.00396844	3	120.267	96.2401	57.0791	49.9633	45.6747	88.5913	49.2718	54.4765	58.4881	52.7608	49.007	133.8	141.946	76.2462	59.2875	75.0138	44.2293
Cd86	9.54683	-0.779089	0.469544	24.5816	0.000167786	0.00399912	2	6.01335	0	8.64834	24.4918	22.8373	8.85913	3.71862	6.95444	13.8244	15.9881	10.1394	4.51011	2.51231	2.14778	6.975	16.5285	8.1475
Mrc1	44.5944	-1.2687	0.25396	24.4956	0.000174314	0.00414415	4	66.1468	60.1501	77.8351	74.4551	43.4997	59.0609	66.0056	23.1815	32.966	32.7757	27.8833	56.3763	55.2709	23.6256	26.1562	15.257	17.4589
Fgd4	12.566	-0.751421	0.375538	24.4046	0.000181495	0.00430396	2	6.01335	10.6933	21.6209	24.4918	23.9248	7.87479	4.64828	8.11352	17.0147	18.3863	12.6742	3.00674	3.14039	12.8867	13.0781	19.0713	6.98357
Mat2a	22.6808	-0.599901	0.295186	24.3645	0.000184747	0.00436674	3	46.1023	37.4267	13.8374	16.6544	28.2748	28.5461	28.8193	27.8178	7.44393	18.3863	14.3641	27.8123	33.2881	17.1822	15.6937	7.62852	16.295
Rai14	6.32741	-0.0321482	0.556719	24.3605	0.000185075	0.00436674	3	16.0356	5.34667	5.18901	2.93902	0	12.7965	14.8745	4.6363	3.19026	2.39822	1.6899	12.027	9.42117	6.44334	3.4875	1.27142	5.81964
Cdk1	9.09192	-0.467508	0.476375	24.3067	0.000189541	0.00446088	3	20.0445	10.6933	7.78351	3.91869	4.34997	8.85913	17.6635	10.4317	8.50735	3.99703	6.75959	22.5505	12.5616	8.59112	4.35937	0	3.49178
Dgkz	34.1429	-0.331216	0.258755	24.1717	0.000201225	0.00472108	3	67.149	57.4767	20.756	26.4511	25.0123	47.2487	28.8193	27.8178	27.6489	27.9792	21.9687	51.1145	47.1059	41.8817	24.4125	17.7999	19.7868
Havcr2	12.7803	-0.0339773	0.383327	24.1674	0.000201605	0.00472108	4	14.0311	20.05	6.91868	11.7561	4.34997	18.7026	21.3821	16.227	4.25368	11.1917	9.29444	25.5573	20.7266	13.9606	4.35937	6.3571	8.1475
Fcgrt	53.7202	-0.716342	0.263916	24.0811	0.000209462	0.00489285	1	74.1646	22.7234	65.7274	88.1705	84.8244	68.9044	51.1311	34.7722	52.1075	60.7549	50.6969	28.564	27.6354	16.1084	32.2594	81.3709	73.3275
Dpep2	40.7277	0.237558	0.217953	24.0088	0.000216271	0.00503932	1	23.0512	25.3967	26.8099	46.0446	46.7621	48.2331	37.1862	31.295	48.9173	58.3567	66.7509	30.0674	30.1477	26.8473	32.2594	57.2139	57.0325
Dhcr24	6.84204	-1.5559	0.600035	23.8984	0.000227095	0.0052784	4	11.0245	17.3767	18.1615	8.81705	1.08749	11.8122	7.43725	6.95444	0	0.799406	0	7.51684	12.5616	6.44334	2.61562	2.54284	1.16393
Cited2	26.2655	-0.240704	0.291494	23.8912	0.000227815	0.00528204	2	12.0267	22.7234	52.7549	49.9633	26.0998	12.7965	15.8041	28.9768	23.3952	30.3774	19.4338	13.5303	11.3054	20.4039	25.2844	43.2283	38.4096
Oas1b	4.39182	-0.270397	0.645637	23.8841	0.000228539	0.00528573	2	1.00222	2.67334	8.64834	6.8577	4.34997	0.984348	0	9.27259	6.38051	7.19466	5.91464	0	0.628078	4.29556	5.23125	8.89994	2.32786
Ccr5	11.7249	-0.313569	0.439268	23.7597	0.00024145	0.0055706	1	5.01112	1.33667	6.05384	29.3902	32.6248	6.89044	8.3669	5.79537	11.6976	19.1858	20.2788	6.76516	7.53694	4.29556	11.3344	7.62852	15.1311
Gpr65	15.4507	-0.516553	0.359622	23.6954	0.000248418	0.00571727	1	12.0267	6.68334	12.9725	35.2682	33.7122	7.87479	8.3669	11.5907	21.2684	22.3834	12.6742	8.26853	5.6527	5.36945	14.8219	21.6141	22.1146
Tpm4	41.8683	-0.940443	0.229291	23.6789	0.000250225	0.00574474	3	103.229	74.8534	31.9989	39.1869	52.1996	40.3583	47.4124	38.2494	23.3952	25.581	47.3171	35.3292	40.8251	24.6995	18.3094	29.2427	39.5736
Tmem176b	9.46129	-1.51608	0.467251	23.6449	0.000254019	0.0058176	1	9.02002	2.67334	7.78351	34.2885	23.9248	7.87479	7.43725	3.47722	9.57077	12.7905	11.8293	3.00674	1.88423	1.07389	6.10312	7.62852	10.4754
Gadd45a	36.3005	-0.302441	0.275645	23.4805	0.000273139	0.00624022	1	51.1134	28.07	37.1879	43.1056	44.5872	22.64	26.0304	17.3861	28.7123	35.9733	69.2858	38.3359	42.0812	9.66501	19.1812	43.2283	60.5243
Fndc3a	22.0498	-0.511732	0.285281	23.4647	0.000275046	0.00626851	2	18.04	21.3867	41.5121	36.2479	30.4498	5.90609	11.1559	25.4996	30.8392	22.3834	19.4338	10.5236	12.5616	17.1822	27.0281	33.0569	11.6393
Tkt	82.316	-0.0342037	0.169902	23.3962	0.000283486	0.00644518	4	93.2069	130.993	92.5373	53.882	53.2871	78.7479	80.8801	110.112	79.7564	71.1472	68.4408	86.4437	86.0467	102.02	93.2906	53.3996	65.18
Cd274	38.0325	-0.705612	0.300179	23.3609	0.000287939	0.00651653	2	33.0734	25.3967	56.2142	83.2721	64.162	9.84348	26.96	47.522	59.5515	35.1739	31.2631	16.5371	12.5616	16.1084	39.2344	41.9568	47.7211
Ctdsp2	17.6067	0.00685789	0.30931	23.3603	0.000288016	0.00651653	2	8.0178	9.35668	28.5395	28.4105	19.5749	9.84348	13.9448	12.7498	26.5855	19.1858	17.7439	12.7786	9.42117	8.59112	27.0281	25.4284	22.1146
Ogfr	23.0111	-0.128433	0.293574	23.305	0.000295118	0.00666114	2	11.0245	12.03	22.4857	39.1869	36.9747	13.7809	13.0152	23.1815	28.7123	35.9733	38.0227	14.282	11.9335	17.1822	30.5156	25.4284	17.4589
Gm43302	4.82998	-2.17524	0.778963	23.2598	0.000301066	0.00677905	2	0	0	12.1077	25.4715	18.4874	0.984348	0	2.31815	6.38051	3.19763	1.6899	0.751684	0	2.14778	3.4875	5.08568	0
Eva1b	7.66874	-0.0890645	0.472863	23.2006	0.000309028	0.00694164	2	5.01112	1.33667	6.91868	12.7357	15.2249	2.95304	3.71862	4.6363	12.761	11.9911	10.9843	3.75842	3.14039	1.07389	12.2062	11.4428	10.4754
Slc28a2	11.9058	0.484242	0.510909	23.0635	0.000328253	0.00735584	2	2.00445	0	12.1077	17.6341	26.0998	2.95304	0.929656	19.7043	21.2684	15.9881	6.75959	6.01348	3.76847	16.1084	15.6937	19.0713	16.295
Plk2	38.2174	-0.13063	0.247922	23.0109	0.00033595	0.00751038	4	70.1557	68.1701	19.0264	30.3698	36.9747	19.687	42.7642	46.363	31.9026	27.9792	27.8833	41.3426	62.8078	41.8817	22.6687	31.7855	27.9343
Angptl2	30.8753	-0.252047	0.331117	22.9367	0.000347103	0.00774122	3	89.198	52.13	15.567	13.7154	11.9624	45.28	28.8193	26.6587	25.5221	19.1858	23.6586	42.0943	40.197	26.8473	18.3094	17.7999	27.9343
Dck	17.5216	-0.501693	0.39414	22.7677	0.000373881	0.00829893	2	5.01112	18.7134	27.6747	44.0852	25.0123	8.85913	3.71862	26.6587	29.7757	13.5899	8.44949	4.51011	8.16502	8.59112	20.0531	22.8856	22.1146
Gnl3	9.17253	0.653444	0.51496	22.7718	0.000373217	0.00829893	3	14.0311	17.3767	0.864834	2.93902	3.26248	5.90609	18.5931	5.79537	3.19026	3.99703	11.8293	18.0404	15.702	12.8867	0.871875	10.1714	10.4754
2410006H16Rik	20.7499	0.0810318	0.321696	22.7228	0.000381346	0.00842469	1	10.0222	9.35668	11.2428	45.0649	35.8872	12.7965	15.8041	16.227	13.8244	34.3745	26.1934	21.7989	17.5862	12.8867	15.6937	19.0713	34.9178
Atp1a1	58.0892	-0.0578311	0.195915	22.7253	0.000380916	0.00842469	4	75.1668	84.2101	41.5121	37.2275	44.5872	79.7322	74.3725	71.8626	40.4099	43.9674	59.1464	69.9067	61.5517	67.6551	57.5437	35.5998	43.0653
Mcoln2	18.9313	0.439295	0.334233	22.7023	0.000384793	0.00848083	2	2.00445	12.03	25.945	27.4308	19.5749	7.87479	13.9448	9.27259	31.9026	29.578	22.8136	17.2887	12.5616	15.0345	23.5406	25.4284	25.6064
Limd2	38.7249	-0.406843	0.304388	22.6872	0.000387355	0.00851726	2	10.0222	22.7234	41.5121	73.4754	81.5619	30.5148	34.3973	31.295	62.7417	46.3656	41.4025	22.5505	22.6108	12.8867	43.5937	31.7855	48.885
Gbp6	19.8873	0.109915	0.798355	22.6662	0.00039095	0.00854188	2	0	1.33667	24.2154	46.0446	30.4498	3.93739	7.43725	30.1359	34.0294	39.9703	16.899	3.75842	0	3.22167	21.7969	31.7855	43.0653
Msmo1	37.8933	-0.524494	0.251052	22.6646	0.00039121	0.00854188	4	59.1312	48.12	63.1329	35.2682	17.3999	53.1548	52.0607	40.5676	26.5855	21.584	23.6586	46.6044	41.4532	45.1034	24.4125	20.3427	25.6064
Prdx1	936.617	-0.0439802	0.250534	22.6669	0.000390826	0.00854188	4	1526.39	2095.9	615.762	433.995	470.884	669.357	799.504	1671.38	884.765	698.681	1132.23	674.261	676.44	1077.11	739.35	731.066	1025.42
Fos	9.65133	-0.670727	0.452036	22.6348	0.00039638	0.00863464	3	23.0512	24.06	1.72967	4.89836	13.0499	11.8122	12.0855	8.11352	1.06342	4.79644	12.6742	7.51684	11.9335	7.51723	2.61562	10.1714	6.98357
Anxa6	46.6593	-0.332207	0.215272	22.6164	0.000399587	0.0086843	2	34.0756	29.4067	80.4296	82.2924	68.512	32.4835	27.8897	33.6131	48.9173	43.9674	42.2474	38.3359	32.6601	33.2906	44.4656	77.5566	43.0653
Tor1aip1	57.115	-0.360843	0.219609	22.6002	0.000402438	0.008726	2	35.0779	46.7834	89.0779	89.1501	95.6993	32.4835	55.7794	48.6811	55.2978	59.9555	54.9217	29.3157	28.2635	46.1773	57.5437	69.9281	76.8193
Ifitm2	126.522	-0.349856	0.186752	22.5768	0.000406596	0.0087958	2	86.1913	74.8534	180.75	215.528	217.498	109.263	98.5435	110.112	119.103	126.306	124.207	91.7055	86.0467	89.1329	122.062	170.37	129.196
Top1	17.5902	-0.32531	0.331023	22.5128	0.000418196	0.0090259	3	32.0712	17.3767	8.64834	14.6951	15.2249	34.4522	19.5228	17.3861	11.6976	11.1917	20.2788	21.0472	25.1231	16.1084	4.35937	8.89994	20.9507
Lhfpl2	37.0252	0.0697072	0.296258	22.5042	0.000419767	0.00903897	3	88.1958	53.4667	20.756	19.5934	28.2748	25.5931	41.8345	15.068	14.8879	23.9822	37.1777	67.6516	67.8324	36.5123	36.6187	22.8856	29.0982
Tk1	4.28631	-0.247197	0.664189	22.3951	0.000440352	0.0094605	4	2.00445	18.7134	5.18901	0	2.17498	3.93739	3.71862	5.79537	2.12684	0.799406	1.6899	8.26853	6.28078	7.51723	3.4875	0	1.16393
Plp2	57.1931	0.171937	0.189019	22.3201	0.000455082	0.00975458	4	61.1357	80.2001	44.9714	33.3088	44.5872	65.9513	57.6387	70.7035	60.6149	40.7697	49.852	66.1482	65.9482	84.8373	68.0062	36.8712	40.7375
Atp2a2	25.2477	-0.233922	0.281645	22.3122	0.000456673	0.00976633	4	43.0957	41.4367	21.6209	16.6544	14.1374	31.4991	23.2414	33.6131	29.7757	14.3893	16.899	23.3022	33.2881	39.7339	16.5656	10.1714	19.7868
Sdcbp	329.807	-0.0661877	0.116959	22.2647	0.000466271	0.00994888	2	283.63	249.957	441.066	422.239	404.547	268.727	281.686	274.701	341.358	318.164	338.824	258.579	283.891	307.133	394.959	377.612	359.654
Mmp12	240.659	-0.0907989	0.419961	22.2132	0.000476916	0.0101529	4	430.957	732.494	99.456	55.8413	78.2994	170.292	198.017	481.016	246.713	161.48	316.856	180.404	203.497	347.94	156.937	88.9994	141.999
Mxd4	14.0743	0.396591	0.354402	22.1962	0.000480494	0.0102059	2	5.01112	2.67334	21.6209	22.5325	17.3999	5.90609	6.50759	11.5907	17.0147	19.1858	15.2091	11.2753	9.42117	11.8128	27.9	19.0713	15.1311
Mfsd12	95.1638	-0.213225	0.162349	22.1449	0.000491405	0.010414	2	108.24	85.5467	113.293	145.971	113.099	51.1861	61.3573	79.9761	87.2004	115.115	98.014	77.4235	86.6748	61.2117	90.675	132.228	110.573
Mgat1	32.4025	0.124172	0.237128	22.127	0.000495275	0.0104723	2	24.0534	14.7033	42.3769	41.1462	33.7122	23.6244	20.4524	32.4541	41.4733	45.5662	41.4025	18.0404	25.1231	23.6256	42.7219	41.9568	38.4096
Ms4a6d	110.936	-0.207801	0.192208	22.0953	0.000502196	0.0105948	2	74.1646	89.5567	123.671	165.565	133.761	89.5757	105.051	136.771	158.449	127.106	106.464	53.3696	69.7167	70.8767	100.266	150.028	131.524
Rhog	80.4691	-0.311786	0.172032	22.0682	0.000508199	0.0106973	1	71.1579	72.1801	82.1593	104.825	128.324	68.9044	77.1614	54.4765	89.3272	91.1323	95.4792	56.3763	52.1305	48.3251	84.5718	102.985	88.4586
Eif5a	147.586	-0.296319	0.147396	22.0607	0.000509857	0.0107081	4	210.467	219.214	138.374	126.378	120.712	164.386	166.408	201.679	120.166	107.12	139.417	135.303	131.896	163.231	144.731	104.256	115.229
Gprc5c	4.69999	0.562447	0.603594	22.0509	0.000512052	0.0107302	2	0	1.33667	8.64834	8.81705	3.26248	0.984348	2.78897	3.47722	7.44393	10.3923	2.53485	0.751684	3.76847	2.14778	8.71875	10.1714	4.65571
Fth1	6969.99	-0.0592704	0.0946625	22.0242	0.000518085	0.0108082	4	9340.73	9876.64	6319.34	6663.73	6445.56	6308.69	6233.34	6648.45	5622.3	5165.76	5387.39	7751.37	7562.69	8660.92	7240.92	6775.4	6486.57
Rpl10a	194.738	0.150083	0.13223	22.0265	0.00051757	0.0108082	4	215.478	223.224	211.02	149.89	135.936	188.011	198.017	192.406	186.098	151.887	162.23	288.647	246.835	234.108	215.353	158.927	152.475
Ifi205	21.8649	-0.146424	0.824047	22.0029	0.000522944	0.0108854	2	0	5.34667	18.1615	52.9023	52.1996	0	13.9448	41.7267	44.6636	31.9763	15.2091	0.751684	1.88423	2.14778	27.9	27.9712	34.9178
Gnptab	18.9527	0.00119595	0.29783	21.997	0.000524287	0.010889	3	28.0623	22.7234	12.9725	12.7357	15.2249	28.5461	21.3821	20.8633	14.8879	11.9911	7.60454	30.8191	29.5197	26.8473	11.3344	12.7142	13.9671
Hnrnpk	116.714	-0.33584	0.145017	21.992	0.000525441	0.010889	3	190.423	124.31	104.645	122.459	117.449	127.965	159.901	86.9305	93.5809	118.312	105.619	107.491	133.153	85.9112	85.4437	102.985	117.557
Spred2	3.41066	0.226016	0.787485	21.9655	0.000531556	0.0109914	4	5.01112	5.34667	0.864834	1.95934	0	9.84348	2.78897	5.79537	0	0	0.844949	6.76516	5.02462	9.66501	1.74375	0	2.32786
Gbp9	5.47227	-0.314107	0.6401	21.9568	0.000533593	0.0110092	2	0	1.33667	11.2428	18.6138	5.43746	1.9687	0.929656	5.79537	12.761	3.19763	5.06969	0.751684	1.88423	1.07389	6.975	10.1714	5.81964
Ptprc	44.3291	-0.63197	0.201142	21.8922	0.000548894	0.0113	2	42.0934	37.4267	63.9977	84.2518	77.2119	28.5461	36.2566	25.4996	44.6636	52.7608	38.8676	26.309	30.1477	28.995	43.5937	53.3996	39.5736
Asph	20.8805	-0.281907	0.318124	21.6871	0.000600373	0.0123327	2	15.0334	29.4067	18.1615	34.2885	27.1873	6.89044	5.57794	24.3406	40.4099	23.1828	19.4338	10.5236	10.0492	17.1822	27.0281	24.157	22.1146
Nectin4	7.97997	0.037321	0.475073	21.6285	0.000615945	0.0126248	2	2.00445	1.33667	13.8374	17.6341	8.69993	1.9687	6.50759	5.79537	11.6976	10.3923	11.8293	2.25505	2.51231	6.44334	12.2062	8.89994	11.6393
Pcdh7	8.42642	0.995338	0.549068	21.5244	0.000644586	0.013183	4	8.0178	10.6933	4.32417	0.979672	0	13.7809	13.9448	18.5452	4.25368	3.99703	6.75959	16.5371	17.5862	7.51723	11.3344	3.81426	1.16393
Rcbtb2	72.4129	0.558697	0.188056	21.4945	0.00065305	0.0133055	1	64.1424	41.4367	57.0791	61.7193	54.3746	64.967	70.6538	42.8857	68.0588	111.117	106.464	63.8932	65.3201	55.8423	82.8281	113.156	107.081
Arap1	45.2117	-0.311862	0.203698	21.4882	0.000654835	0.0133055	2	44.0979	37.4267	55.3494	69.5567	65.2495	25.5931	29.749	44.0448	40.4099	58.3567	50.6969	28.564	28.2635	31.1428	48.825	49.5854	61.6882
Ccna2	3.88906	-0.295921	0.692973	21.4921	0.000653747	0.0133055	4	4.0089	8.02001	9.51318	1.95934	0	1.9687	5.57794	3.47722	4.25368	1.59881	0	8.26853	7.53694	6.44334	3.4875	0	0
Eaf1	24.2187	-0.463017	0.302195	21.456	0.000664115	0.0134649	3	56.1246	41.4367	13.8374	15.6748	16.3124	37.4052	30.6786	25.4996	17.0147	19.1858	14.3641	24.8056	33.9162	13.9606	16.5656	13.9856	20.9507
Sfpq	19.5815	-0.24976	0.304479	21.4033	0.000679568	0.0137484	4	33.0734	41.4367	18.1615	13.7154	9.78743	19.687	18.5931	26.6587	7.44393	13.5899	14.3641	22.5505	28.8916	26.8473	17.4375	10.1714	10.4754
Slc20a1	12.7532	-0.274653	0.410079	21.3757	0.000687779	0.0138547	3	30.0667	17.3767	7.78351	4.89836	5.43746	25.5931	18.5931	4.6363	11.6976	11.1917	10.1394	16.5371	21.9827	10.7389	7.84687	7.62852	4.65571
Hspd1	34.145	-0.347218	0.23974	21.3772	0.000687331	0.0138547	4	61.1357	68.1701	24.2154	29.3902	25.0123	37.4052	37.1862	32.4541	19.1415	24.7816	27.8833	32.3224	47.1059	38.66	22.6687	20.3427	32.59
Marchf5	39.3891	-0.465352	0.220731	21.3509	0.000695264	0.0139754	2	34.0756	41.4367	57.9439	67.5974	50.0246	18.7026	26.0304	44.0448	52.1075	45.5662	28.7283	23.3022	20.0985	30.0689	43.5937	43.2283	43.0653
Angptl4	2.37696	-1.27015	0.952457	21.2954	0.000712283	0.0142868	1	2.00445	0	2.5945	2.93902	10.8749	0	0	0	2.12684	2.39822	7.60454	1.50337	0	0	0	2.54284	5.81964
Usp2	1.7719	-0.111698	1.103	21.2369	0.000730668	0.0146243	3	4.0089	4.01	0	0	0	4.92174	2.78897	1.15907	0	0.799406	0	5.26179	5.02462	2.14778	0	0	0
Cdkn1a	152.4	0.823404	0.1909	21.0734	0.0007846	0.0156703	2	41.0912	81.5367	88.2131	156.748	121.799	174.23	176.635	177.338	205.24	222.235	164.765	121.021	112.426	139.606	178.734	244.113	185.065
Tmem229b	11.2968	-0.143474	0.392513	21.0578	0.000789932	0.0157432	2	7.01557	4.01	15.567	25.4715	16.3124	3.93739	7.43725	5.79537	20.205	16.7875	5.06969	6.01348	6.28078	7.51723	16.5656	15.257	12.8032
Gtf2h2	4.55089	-0.6576	0.739521	21.0385	0.000796608	0.0158425	3	13.0289	6.68334	3.45934	0.979672	0	8.85913	6.50759	4.6363	0	3.99703	3.37979	9.7719	9.42117	5.36945	0	1.27142	0
Oas2	18.3896	0.199153	0.441276	21.0285	0.000800088	0.015878	2	0	4.01	27.6747	32.3292	26.0998	4.92174	10.2262	27.8178	42.5368	25.581	23.6586	11.2753	7.53694	16.1084	19.1812	12.7142	20.9507
Actb	1933.65	-0.345711	0.128704	20.9588	0.000824718	0.0163322	4	2098.66	2650.61	2005.55	1994.61	2066.23	2384.09	2227.46	2078.22	1883.32	1343	1253.9	2288.13	2205.81	1785.88	1487.42	1650.3	1468.88
Rab3il1	26.3167	-0.563861	0.278772	20.9372	0.000832489	0.0164513	3	43.0957	24.06	24.2154	27.4308	29.3623	58.0765	13.9448	20.8633	19.1415	19.1858	22.8136	40.591	29.5197	17.1822	18.3094	13.9856	25.6064
Tnfrsf12a	3.77074	-0.0348318	0.751857	20.8934	0.000848486	0.0167321	3	17.0378	4.01	0	0.979672	2.17498	2.95304	6.50759	0	0	2.39822	6.75959	2.25505	7.53694	2.14778	0.871875	3.81426	4.65571
Adgre4	1.57113	-0.175768	1.25807	20.8564	0.000862241	0.0169677	1	0	0	0	3.91869	5.43746	0	0	0	1.06342	5.59585	0.844949	0	0	0	0	6.3571	3.49178
Kctd12	29.1843	-0.463476	0.299338	20.8018	0.00088296	0.017339	3	37.0823	17.3767	41.5121	28.4105	29.3623	53.1548	40.9049	27.8178	22.3318	19.9852	10.9843	48.8595	38.9408	16.1084	13.95	33.0569	16.295
Bhlhe41	31.2889	-0.150353	0.277658	20.7856	0.000889192	0.0174248	3	48.1068	53.4667	16.4319	19.5934	25.0123	28.5461	42.7642	47.522	25.5221	25.581	22.8136	45.8528	47.1059	21.4778	17.4375	19.0713	25.6064
Mki67	4.77528	0.0401312	0.613261	20.7671	0.000896374	0.0175289	4	7.01557	5.34667	8.64834	3.91869	0	3.93739	6.50759	3.47722	4.25368	2.39822	0	9.02021	13.8177	6.44334	5.23125	0	1.16393
Ybx1	144.637	0.0518369	0.14053	20.745	0.000904993	0.0176606	4	152.338	183.123	164.319	114.622	127.237	165.371	142.237	147.202	132.927	79.1412	103.084	157.854	168.953	184.709	178.734	134.77	122.212
Tnip3	8.13256	0.298417	0.484298	20.6854	0.000928756	0.0180866	3	11.0245	13.3667	0	5.87803	6.52495	2.95304	18.5931	16.227	4.25368	7.19466	10.1394	2.25505	11.9335	7.51723	6.10312	3.81426	10.4754
Tln1	61.2267	-0.562838	0.176343	20.6093	0.00095994	0.0186551	4	93.2069	98.9134	70.0516	63.6787	63.0745	60.0452	63.2166	67.2263	54.2344	39.1709	41.4025	64.6449	74.7413	63.3595	52.3125	34.3283	37.2457
H2-Ab1	9.3698	-0.758761	0.492878	20.5691	0.000976826	0.018944	1	5.01112	4.01	11.2428	23.5121	29.3623	4.92174	3.71862	5.79537	7.44393	11.9911	5.91464	0	6.28078	3.22167	4.35937	12.7142	19.7868
Basp1	89.2327	0.376054	0.165654	20.5118	0.0010014	0.0193803	4	106.236	96.2401	54.4846	55.8413	58.7246	98.4348	114.348	134.453	72.3125	82.3389	80.2701	87.9471	113.682	105.241	88.0593	77.5566	90.7864
Apoe	456.467	-2.37196	0.208458	20.3968	0.00105255	0.0202877	1	1401.11	997.154	767.973	1181.48	1108.15	127.965	129.222	106.635	130.801	261.406	231.516	183.411	126.244	131.015	205.762	312.769	357.326
Nme1	28.4849	-0.249199	0.25937	20.3967	0.00105261	0.0202877	4	38.0845	50.7934	32.8637	14.6951	19.5749	32.4835	32.538	30.1359	26.5855	12.7905	28.7283	41.3426	32.032	32.2167	25.2844	17.7999	16.295
Trmt61a	3.49371	-1.04597	0.74852	20.3639	0.00106769	0.020536	3	10.0222	9.35668	2.5945	0.979672	1.08749	2.95304	9.29656	2.31815	1.06342	1.59881	1.6899	4.51011	7.53694	3.22167	0	0	1.16393
Hmox2	67.1698	-0.268942	0.204721	20.3454	0.00107629	0.0206591	2	44.0979	73.5167	72.6461	89.1501	90.2618	66.9357	42.7642	61.4309	103.152	86.3359	53.2318	35.3292	39.5689	56.9162	68.8781	88.9994	68.6718
Col18a1	14.306	-0.355586	0.365273	20.3169	0.00108966	0.0208729	4	24.0534	33.4167	12.1077	4.89836	6.52495	12.7965	20.4524	19.7043	12.761	11.9911	13.5192	12.7786	17.5862	20.4039	6.975	5.08568	8.1475
H2-Q7	5.45996	1.11925	0.757443	20.2794	0.00110746	0.0211706	1	0	0	0	10.7764	5.43746	2.95304	4.64828	8.11352	7.44393	10.3923	10.9843	1.50337	1.88423	0	3.4875	8.89994	16.295
H2-Eb1	5.07016	-1.65796	0.640035	20.2501	0.00112164	0.0213979	1	2.00445	2.67334	4.32417	20.5731	14.1374	4.92174	1.85931	1.15907	4.25368	9.59288	3.37979	5.26179	0	1.07389	2.61562	2.54284	5.81964
Pabpc4	9.23121	-0.322072	0.441154	20.2288	0.00113202	0.0215521	4	13.0289	21.3867	5.18901	5.87803	4.34997	13.7809	16.7338	15.068	3.19026	3.99703	5.06969	11.2753	8.16502	12.8867	6.975	7.62852	2.32786
Anxa3	57.854	-0.379441	0.206568	20.1868	0.00115276	0.0219024	4	91.2024	109.607	61.4032	47.0243	44.5872	57.0922	70.6538	45.2039	49.9807	39.1709	42.2474	54.873	82.2782	51.5467	61.9031	30.5141	44.2293
Pdgfb	40.3765	0.466802	0.227363	20.1546	0.00116893	0.0221648	3	48.1068	37.4267	23.3505	28.4105	20.6623	46.2644	63.2166	38.2494	29.7757	48.7638	41.4025	42.846	75.9974	41.8817	36.6187	34.3283	29.0982
Gsr	19.0261	-0.115815	0.324308	20.1359	0.00117842	0.0222994	4	21.0467	52.13	8.64834	15.6748	13.0499	13.7809	23.2414	28.9768	8.50735	15.9881	15.2091	15.0337	12.5616	25.7734	12.2062	24.157	17.4589
Zfp36l1	22.283	-0.87282	0.418161	20.1179	0.00118765	0.0224289	1	4.0089	12.03	39.7824	73.4754	54.3746	20.6713	13.9448	8.11352	15.9513	20.7846	9.29444	5.26179	9.42117	8.59112	25.2844	36.8712	20.9507
Casp4	15.8286	0.517174	0.372593	20.0775	0.00120858	0.0227782	2	6.01335	2.67334	18.1615	25.4715	10.8749	6.89044	20.4524	15.068	30.8392	22.3834	16.899	9.02021	10.6773	7.51723	17.4375	25.4284	23.2786
Ggta1	21.7262	-0.175825	0.290528	20.0006	0.00124943	0.0235009	3	39.0868	16.04	18.1615	12.7357	18.4874	42.327	28.8193	15.068	20.205	12.7905	20.2788	32.3224	23.2389	13.9606	15.6937	20.3427	19.7868
Hsp90aa1	58.2774	-0.184267	0.190174	19.931	0.00128756	0.0241696	3	85.1891	73.5167	35.4582	49.9633	51.1121	71.8574	92.0359	53.3174	40.4099	61.5543	63.3712	57.8797	64.064	54.7684	39.2344	45.7711	51.2128
Eif4g2	120.232	-0.230869	0.147275	19.8865	0.00131251	0.0245886	4	154.343	179.113	102.915	110.703	106.574	139.777	126.433	146.043	81.8833	99.1264	125.052	110.498	132.524	139.606	95.9062	99.1707	94.2782
Laptm4a	159.777	0.00374224	0.138799	19.7739	0.00137791	0.0256088	2	105.234	133.667	186.804	196.914	162.036	181.12	120.855	144.884	199.923	183.064	169.835	136.055	135.037	127.793	162.169	200.884	169.934
Maf	90.3515	-0.324215	0.219933	19.7865	0.00137038	0.0256088	2	45.1001	56.1401	147.887	152.829	105.487	123.044	55.7794	106.635	91.454	83.1383	91.2545	72.1617	49.6182	74.0984	93.2906	104.256	83.8028
Gm49339	163.718	-0.119567	0.172642	19.775	0.00137723	0.0256088	4	164.365	224.56	101.186	152.829	171.824	148.637	185.931	280.496	212.684	119.112	150.401	118.766	133.153	211.556	136.884	119.513	151.311
Syncrip	21.607	-0.117469	0.298178	19.7802	0.00137413	0.0256088	4	34.0756	41.4367	17.2967	13.7154	8.69993	23.6244	33.4676	19.7043	15.9513	14.3893	19.4338	22.5505	32.6601	26.8473	13.0781	15.257	15.1311
Pou3f1	6.57903	0.0687762	0.577111	19.7304	0.00140397	0.0260415	2	2.00445	2.67334	4.32417	10.7764	17.3999	0.984348	1.85931	10.4317	8.50735	4.79644	6.75959	2.25505	1.88423	2.14778	3.4875	15.257	16.295
Alas1	26.59	-0.573189	0.305326	19.7134	0.00141431	0.0261724	3	67.149	54.8034	13.8374	14.6951	27.1873	28.5461	32.538	23.1815	19.1415	16.7875	16.054	29.3157	28.2635	20.4039	14.8219	12.7142	32.59
Pabpc1	169.398	0.237082	0.135268	19.7096	0.00141661	0.0261724	4	170.378	181.787	152.211	109.723	140.286	192.932	194.298	220.224	168.02	119.911	156.316	176.646	198.473	198.67	216.225	147.485	136.18
Tmsb10	218.442	0.191107	0.204405	19.6727	0.00143933	0.0265399	4	148.329	185.797	351.123	240.999	121.799	207.697	217.539	214.429	261.601	127.905	160.54	289.399	287.032	308.206	300.797	143.67	146.655
Dab2	94.2224	-0.35466	0.188607	19.5813	0.00149719	0.0275525	4	81.1802	104.26	85.6186	93.0688	91.3493	198.838	122.715	91.5668	79.7564	87.9347	82.805	105.988	109.914	60.1378	58.4156	73.7423	74.4914
Lamp2	191.31	0.0983422	0.141368	19.5728	0.00150268	0.0275992	2	141.314	130.993	263.774	253.735	192.486	156.511	138.519	183.134	218.001	193.456	172.37	173.639	181.515	182.561	226.687	249.198	194.376
Slc25a5	101.819	-0.274454	0.154214	19.4996	0.00155077	0.0284267	3	155.345	133.667	83.8889	98.9469	93.5243	125.997	103.192	96.2031	82.9467	83.1383	92.0994	108.994	123.103	112.758	68.8781	76.2852	91.9503
Rpl3	147.843	-0.574306	0.138596	19.4885	0.00155821	0.0285074	4	203.452	225.897	221.398	170.463	150.074	138.793	151.534	112.43	115.913	104.722	98.859	170.632	170.209	136.384	146.475	102.985	93.1143
Nptx1	2.81849	0.782555	0.8562	19.4714	0.00156971	0.0286617	4	3.00667	8.02001	0.864834	0	0	3.93739	3.71862	1.15907	2.12684	0.799406	0	4.51011	8.16502	8.59112	1.74375	1.27142	0
Rrm2	5.08769	-0.311305	0.647955	19.3677	0.00164134	0.0299114	4	6.01335	12.03	1.72967	2.93902	2.17498	9.84348	10.2262	4.6363	4.25368	0	0.844949	10.5236	11.9335	2.14778	3.4875	2.54284	1.16393
Tgfbi	8.90138	-0.199034	0.471858	19.3596	0.00164706	0.0299572	3	20.0445	16.04	4.32417	2.93902	3.26248	20.6713	15.8041	4.6363	4.25368	4.79644	5.06969	10.5236	11.3054	9.66501	6.975	6.3571	4.65571
Pclaf	2.07592	0.0294046	0.941193	19.3472	0.00165589	0.0300596	4	3.00667	2.67334	2.5945	0	0	3.93739	5.57794	2.31815	1.06342	0	0	6.01348	3.14039	3.22167	1.74375	0	0
Trim34a	9.36262	-0.316472	0.468458	19.3291	0.00166885	0.0301196	2	3.00667	2.67334	19.0264	20.5731	13.0499	1.9687	7.43725	12.7498	10.6342	7.99406	11.8293	1.50337	2.51231	8.59112	8.71875	15.257	11.6393
Chchd4	9.1095	-0.358807	0.454309	19.337	0.00166319	0.0301196	4	24.0534	12.03	3.45934	5.87803	6.52495	12.7965	12.0855	12.7498	3.19026	8.79347	5.91464	3.75842	13.8177	13.9606	2.61562	5.08568	8.1475
Pdpn	10.4892	0.98862	0.534255	19.3317	0.00166695	0.0301196	4	11.0245	16.04	2.5945	0	0	12.7965	19.5228	18.5452	11.6976	8.79347	14.3641	18.7921	15.702	15.0345	6.10312	3.81426	3.49178
Zc3hav1	33.4669	-0.0111736	0.226528	19.2961	0.00169269	0.0304912	2	22.0489	34.7534	47.5659	45.0649	31.5373	18.7026	25.1007	32.4541	39.3465	43.9674	28.7283	19.5438	24.495	44.0295	33.1312	47.0425	31.4261
Chmp4b	91.3161	-0.258205	0.167577	19.2629	0.00171695	0.0308496	2	87.1935	80.2001	117.617	142.052	115.274	60.0452	58.5683	91.5668	98.898	85.5365	91.2545	68.4033	65.9482	61.2117	102.009	119.513	107.081
Eef1g	100.805	-0.112852	0.164148	19.2588	0.00171999	0.0308496	4	132.294	159.063	74.3758	83.2721	89.1743	100.404	100.403	120.544	70.1857	87.9347	92.9444	130.041	109.286	113.832	91.5468	69.9281	88.4586
St6galnac4	13.5879	-0.403086	0.350842	19.2555	0.00172247	0.0308496	4	38.0845	21.3867	10.378	9.79672	9.78743	9.84348	15.8041	18.5452	7.44393	7.99406	6.75959	10.5236	21.9827	11.8128	8.71875	13.9856	8.1475
Junb	34.9013	-0.013761	0.257199	19.2445	0.00173061	0.0309364	3	40.089	30.7434	24.2154	28.4105	38.0622	25.5931	80.8801	32.4541	47.8539	35.1739	28.7283	17.2887	47.1059	17.1822	34.0031	31.7855	33.7539
Timm17a	21.5292	0.219482	0.298154	19.1931	0.00176927	0.0315671	3	26.0578	24.06	6.91868	19.5934	20.6623	28.5461	32.538	17.3861	11.6976	8.79347	26.1934	30.8191	28.8916	26.8473	12.2062	20.3427	24.4425
Ncoa4	55.1004	-0.432942	0.232711	19.1582	0.00179601	0.0318687	2	38.0845	34.7534	123.671	96.9875	92.4368	23.6244	26.96	47.522	46.7904	50.3626	52.3868	44.3494	42.0812	40.8078	63.6468	61.0281	51.2128
Rassf4	26.749	-0.305318	0.382408	19.161	0.00179381	0.0318687	2	7.01557	6.68334	54.4846	58.7803	46.7621	7.87479	32.538	23.1815	32.966	25.581	27.0384	9.7719	11.3054	18.2561	24.4125	34.3283	33.7539
Cks1b	5.54919	-0.219627	0.60453	19.1577	0.00179638	0.0318687	4	10.0222	18.7134	4.32417	0	1.08749	3.93739	6.50759	10.4317	1.06342	2.39822	4.22474	8.26853	5.02462	10.7389	2.61562	3.81426	1.16393
Parp11	8.67982	0.322749	0.501993	19.1473	0.0018044	0.0318902	2	0	1.33667	10.378	12.7357	14.1374	2.95304	2.78897	16.227	17.0147	14.3893	10.9843	3.75842	3.76847	10.7389	10.4625	8.89994	6.98357
Rnf31	9.43579	0.0431591	0.416845	19.1476	0.0018042	0.0318902	2	3.00667	6.68334	16.4319	14.6951	7.61244	5.90609	4.64828	11.5907	10.6342	16.7875	6.75959	5.26179	2.51231	10.7389	13.95	12.7142	10.4754
Clec4d	271.797	0.263608	0.157967	19.1075	0.0018355	0.0323788	4	295.656	290.057	158.265	175.361	277.31	244.118	277.037	366.267	237.142	265.403	390.366	211.975	233.645	264.177	228.431	316.583	388.752
Spred1	27.4075	-0.0284173	0.274543	19.0904	0.00184901	0.0325558	3	36.0801	32.08	11.2428	20.5731	21.7498	28.5461	56.709	33.6131	30.8392	24.7816	25.3485	31.5707	36.4285	27.9211	13.0781	19.0713	16.295
Ifnar2	59.4487	-0.0520762	0.197784	18.9622	0.00195351	0.0343313	1	41.0912	54.8034	64.8626	69.5567	78.2994	60.0452	35.3269	39.4085	72.3125	79.1412	65.061	43.5977	46.4778	47.2512	54.0562	67.3852	91.9503
Cst3	670.946	0.245989	0.101013	18.9191	0.00198994	0.034906	1	591.312	497.24	633.924	740.632	649.233	600.452	615.432	569.105	660.383	794.61	676.804	671.254	621.797	663.664	651.29	878.551	890.405
Ppia	481.789	0.0424717	0.111848	18.904	0.00200293	0.0350682	4	421.936	550.707	534.468	454.568	409.984	511.861	488.999	536.651	526.392	343.745	418.25	517.159	495.554	614.265	541.434	362.355	462.08
Ftl1	5752.16	0.0355743	0.124024	18.8895	0.00201539	0.0352205	4	7801.32	8256.6	5981.19	4277.25	4508.74	4917.8	4724.51	6087.46	4913	4389.54	4827.19	6223.2	5826.05	7545.15	6604.45	5268.76	5634.58
Cnppd1	27.8485	0.0680713	0.252015	18.87	0.00203229	0.0353908	2	16.0356	16.04	31.9989	35.2682	33.7122	23.6244	17.6635	32.4541	27.6489	38.3715	38.8676	20.2955	16.33	20.4039	29.6437	34.3283	40.7375
Bin1	32.6006	-0.490127	0.238203	18.8695	0.0020327	0.0353908	4	47.1045	49.4567	36.323	24.4918	29.3623	44.2957	41.8345	31.295	19.1415	27.1798	27.0384	45.8528	36.4285	34.3645	22.6687	15.257	22.1146
Sppl2a	42.4627	-0.231787	0.247508	18.8454	0.00205385	0.0356824	2	17.0378	36.09	64.8626	63.6787	45.6747	31.4991	38.1159	45.2039	66.9954	44.7668	50.6969	30.0674	20.0985	30.0689	33.1312	58.4853	45.3932
Fabp4	43.1153	-1.29161	0.23568	18.8417	0.00205706	0.0356824	4	102.227	112.28	99.456	67.5974	65.2495	2.95304	18.5931	23.1815	14.8879	7.99406	18.5889	23.3022	30.7758	52.6206	40.1062	22.8856	30.2621
Ubash3b	8.16462	0.684286	0.494262	18.8338	0.00206401	0.0357367	3	12.0267	13.3667	1.72967	0.979672	3.26248	10.8278	15.8041	11.5907	3.19026	3.19763	7.60454	11.2753	12.5616	10.7389	3.4875	10.1714	6.98357
Cct2	42.8746	-0.291763	0.222295	18.7925	0.00210089	0.0363082	4	64.1424	62.8234	32.8637	26.4511	42.4122	45.28	67.8649	49.8402	35.0928	39.9703	40.5575	38.3359	41.4532	54.7684	33.1312	17.7999	36.0818
H2az1	77.2335	-0.11234	0.166566	18.7648	0.00212591	0.0366729	4	91.2024	117.627	89.0779	63.6787	65.2495	78.7479	81.8097	66.0672	61.6783	45.5662	61.6813	95.4639	99.2363	94.5023	78.4687	49.5854	73.3275
Mpp1	102.835	-0.323067	0.180032	18.7182	0.00216879	0.0373438	2	74.1646	85.5467	172.967	171.443	125.062	82.6853	68.7945	95.0441	127.61	82.3389	79.4252	94.7122	86.6748	69.8029	121.191	124.599	86.1307
Gm37086	12.7682	-0.110681	0.463753	18.7063	0.00217983	0.0374651	2	2.00445	4.01	27.6747	23.5121	21.7498	3.93739	4.64828	16.227	24.4586	15.9881	4.22474	6.01348	8.16502	6.44334	12.2062	24.157	11.6393
Lasp1	66.6263	-0.0118217	0.201882	18.6711	0.00221296	0.0379648	3	143.318	68.1701	53.6197	44.0852	52.1996	58.0765	75.3021	66.0672	54.2344	51.162	54.9217	73.6651	83.5344	76.2462	54.0562	62.2996	61.6882
Abce1	13.3234	-0.564547	0.380972	18.6638	0.00221981	0.0380127	3	21.0467	25.3967	9.51318	5.87803	14.1374	22.64	19.5228	8.11352	6.38051	9.59288	16.054	14.282	20.0985	9.66501	5.23125	3.81426	15.1311
Igsf8	16.1687	-1.41478	0.33182	18.6236	0.00225834	0.0386019	4	32.0712	49.4567	18.1615	11.7561	22.8373	19.687	15.8041	12.7498	7.44393	7.99406	13.5192	12.7786	15.0739	15.0345	6.10312	5.08568	9.31143
Ensa	40.3879	-0.107367	0.238379	18.5965	0.00228461	0.0389297	1	33.0734	22.7234	40.6472	72.4957	56.5496	28.5461	40.9049	32.4541	43.6002	47.9644	32.953	21.7989	37.0566	28.995	28.7719	61.0281	57.0325
Irf2bpl	10.5395	0.224381	0.403117	18.5953	0.00228582	0.0389297	3	17.0378	13.3667	5.18901	5.87803	5.43746	17.7183	13.0152	5.79537	5.3171	5.59585	9.29444	20.2955	18.8423	13.9606	6.975	3.81426	11.6393
Pakap	8.36872	-1.49186	0.486048	18.5836	0.00229727	0.0390536	3	19.0423	14.7033	8.64834	10.7764	10.8749	9.84348	14.8745	6.95444	4.25368	4.79644	2.53485	7.51684	18.2143	2.14778	3.4875	1.27142	2.32786
Tifab	13.7071	-1.2148	0.389422	18.548	0.00233247	0.0395086	2	13.0289	16.04	31.134	19.5934	25.0123	10.8278	0.929656	11.5907	12.761	20.7846	11.8293	8.26853	3.14039	4.29556	16.5656	19.0713	8.1475
Pald1	1.8431	-1.85191	1.13934	18.5503	0.00233023	0.0395086	3	5.01112	4.01	0	0	1.08749	9.84348	3.71862	1.15907	0	0	0.844949	3.75842	0.628078	0	0	1.27142	0
Rps8	258.188	0.229439	0.122179	18.5389	0.00234158	0.0395913	4	263.585	322.137	233.505	194.955	203.361	250.024	263.093	254.996	223.318	215.04	219.687	339.761	337.906	332.906	297.309	219.956	217.655
Rps6	225.418	0.168073	0.121055	18.5108	0.00236986	0.0399972	4	244.543	263.324	193.723	170.463	188.136	236.244	227.766	246.883	207.367	212.642	186.734	260.835	262.537	320.019	228.431	200.884	181.573
BC005537	185.687	0.0149889	0.144871	18.4851	0.002396	0.0403657	4	191.425	260.65	167.778	160.666	162.036	224.431	159.901	236.451	177.591	118.312	139.417	178.149	177.746	250.216	190.941	194.527	166.442
Uhrf1	4.0406	-1.56236	0.747892	18.4754	0.00240601	0.0404616	4	4.0089	18.7134	1.72967	2.93902	3.26248	5.90609	6.50759	5.79537	4.25368	0	0	4.51011	5.02462	4.29556	1.74375	0	0
Plk3	2.77047	-1.20308	1.04848	18.4669	0.00241472	0.0405354	3	16.0356	4.01	0	0	0	7.87479	4.64828	0	0	2.39822	2.53485	4.51011	3.14039	1.07389	0.871875	0	0
Mical2	7.00537	-0.17061	0.57415	18.4302	0.00245284	0.0411015	3	22.0489	12.03	0.864834	2.93902	2.17498	12.7965	8.3669	3.47722	4.25368	2.39822	6.75959	9.02021	13.8177	6.44334	1.74375	7.62852	2.32786
Myo18a	10.7906	0.208892	0.397499	18.3961	0.00248879	0.0416294	1	8.0178	2.67334	10.378	10.7764	18.4874	11.8122	9.29656	2.31815	9.57077	15.1887	16.899	9.02021	7.53694	4.29556	16.5656	17.7999	12.8032
Bcar3	6.03381	-0.0414915	0.572478	18.3502	0.00253811	0.0423787	3	18.04	12.03	1.72967	4.89836	0	6.89044	5.57794	2.31815	4.25368	4.79644	0.844949	9.7719	13.1896	5.36945	1.74375	7.62852	3.49178
Ptpn18	70.658	0.154026	0.176545	18.3445	0.00254429	0.0424063	2	46.1023	38.7634	68.3219	89.1501	76.1244	70.8731	66.9352	63.7491	89.3272	83.1383	86.1848	75.1684	54.0147	47.2512	74.9812	82.6423	88.4586
Il17ra	7.46275	0.041493	0.506027	18.3403	0.00254883	0.0424066	3	10.0222	9.35668	6.91868	4.89836	2.17498	10.8278	20.4524	2.31815	3.19026	4.79644	4.22474	8.26853	19.4704	7.51723	5.23125	2.54284	4.65571
Hnrnpa2b1	87.6526	-0.397994	0.168178	18.3091	0.002583	0.0428989	3	132.294	125.647	91.6724	83.2721	77.2119	90.56	100.403	79.9761	80.8199	63.1531	79.4252	105.988	101.749	85.9112	73.2375	41.9568	76.8193
Glul	35.7297	-0.109267	0.282094	18.2851	0.0026095	0.0432441	2	27.0601	12.03	44.9714	41.1462	68.512	31.4991	16.7338	34.7722	34.0294	40.7697	51.5419	24.0539	26.3793	23.6256	27.0281	64.8424	38.4096
Enc1	8.63209	0.157318	0.483146	18.282	0.00261302	0.0432441	3	12.0267	12.03	1.72967	3.91869	5.43746	25.5931	9.29656	5.79537	3.19026	7.19466	5.91464	15.7854	13.8177	8.59112	7.84687	5.08568	3.49178
Pnpla2	28.133	0.620093	0.259226	18.2262	0.00267585	0.0442058	2	14.0311	12.03	26.8099	28.4105	22.8373	20.6713	26.0304	31.295	53.171	29.578	33.7979	18.0404	21.9827	24.6995	44.4656	34.3283	36.0818
Ninj1	99.3552	-0.0473799	0.193836	18.218	0.00268524	0.0442828	1	138.307	84.2101	70.9164	77.3941	104.399	103.357	134.8	83.4533	80.8199	121.51	137.727	71.41	84.1625	61.2117	64.5187	133.499	137.344
Eif5	37.7867	-0.0189013	0.243699	18.21	0.00269446	0.0443568	3	68.1513	42.7734	22.4857	21.5528	27.1873	47.2487	61.3573	27.8178	31.9026	35.9733	42.2474	41.3426	44.5935	38.66	23.5406	31.7855	33.7539
Arel1	11.9646	0.0817905	0.382553	18.1884	0.00271928	0.0446287	2	5.01112	9.35668	15.567	17.6341	8.69993	5.90609	10.2262	20.8633	19.1415	15.9881	8.44949	6.76516	5.6527	9.66501	18.3094	20.3427	5.81964
Tdrd7	16.2846	-0.314187	0.356829	18.1833	0.00272527	0.0446287	2	11.0245	12.03	20.756	27.4308	19.5749	5.90609	11.1559	13.9089	32.966	19.1858	17.7439	12.027	2.51231	11.8128	20.0531	17.7999	20.9507
Cd83	11.5639	-0.835703	0.465673	18.1843	0.00272404	0.0446287	3	11.0245	5.34667	14.7022	25.4715	23.9248	4.92174	27.8897	1.15907	9.57077	6.39525	9.29444	7.51684	22.6108	4.29556	4.35937	7.62852	10.4754
mt-Rnr2	10095.3	0.570016	0.164102	18.1014	0.00282197	0.0461317	2	3938.74	8867.45	6192.21	6704.87	8366.07	12861.5	10697.5	12965.4	14030.8	14175.9	13884.2	6620.84	7001.19	7937.12	9946.35	14229.7	13200.1
Slc15a4	19.0137	-0.289622	0.294096	18.0755	0.00285328	0.0464811	2	13.0289	10.6933	26.8099	28.4105	33.7122	8.85913	12.0855	17.3861	23.3952	23.9822	23.6586	13.5303	11.3054	10.7389	18.3094	22.8856	24.4425
mt-Co1	3161.34	0.862517	0.180039	18.076	0.00285261	0.0464811	4	2697.99	2573.09	2087.71	1022.78	1449.63	4965.05	4138.83	4912.16	4134.57	2160	3132.22	2874.44	3076.33	4087.23	4017.6	3427.75	2985.48
Tomm20	63.3513	-0.31402	0.189149	18.0407	0.00289582	0.0470922	3	100.222	94.9034	56.2142	38.2072	69.5995	75.7948	74.3725	56.7946	48.9173	47.9644	54.9217	78.1752	71.6009	55.8423	45.3375	53.3996	54.7046
Hspa8	397.198	-0.216157	0.106186	18.0282	0.00291123	0.0472608	2	390.868	523.974	490.361	465.344	408.897	289.398	318.872	409.153	394.528	442.072	333.755	345.775	309.643	407.004	463.837	399.226	359.654
Tmx4	13.0256	0.457594	0.391916	18.007	0.00293767	0.0476076	4	10.0222	20.05	5.18901	5.87803	7.61244	19.687	15.8041	20.8633	11.6976	12.7905	8.44949	15.0337	20.7266	26.8473	12.2062	5.08568	3.49178
Vdac2	118.349	-0.117962	0.163631	17.9807	0.00297066	0.048059	3	167.371	172.43	82.1593	96.9875	101.137	130.918	144.097	126.339	116.976	86.3359	99.7039	131.545	141.946	107.389	103.753	86.4565	116.393
Pgs1	11.1809	-0.00822065	0.408264	17.9313	0.00303376	0.0489952	3	16.0356	16.04	4.32417	5.87803	6.52495	15.7496	23.2414	13.9089	6.38051	6.39525	14.3641	13.5303	14.4458	7.51723	4.35937	5.08568	16.295
Arsb	37.7344	0.34852	0.223045	17.9156	0.00305411	0.0491544	4	31.069	33.4167	44.9714	23.5121	29.3623	54.1392	29.749	40.5676	42.5368	19.1858	26.1934	51.1145	44.5935	55.8423	53.1844	31.7855	30.2621
Hnrnpa1	38.2326	-0.484636	0.252857	17.9166	0.00305278	0.0491544	4	47.1045	70.8434	30.2692	37.2275	35.8872	49.2174	60.4276	46.363	28.7123	15.9881	27.8833	42.846	42.7093	31.1428	37.4906	19.0713	26.7704
Ier5	42.822	-0.0206323	0.247431	17.9064	0.00306605	0.0491775	1	35.0779	30.7434	21.6209	72.4957	54.3746	38.3896	33.4676	31.295	62.7417	56.7579	53.2318	27.0606	33.2881	28.995	33.1312	55.9425	59.3603
Rtn4	209.044	-0.0340313	0.126758	17.9082	0.00306371	0.0491775	4	200.445	271.344	185.939	190.056	183.786	200.807	245.429	289.768	241.396	181.465	173.214	188.673	206.638	239.477	218.841	152.57	183.901
Adssl1	22.4829	-0.218364	0.313247	17.8202	0.00318045	0.0509253		27.0601	56.1401	12.1077	14.6951	10.8749	31.4991	24.1711	26.6587	15.9513	17.5869	24.5035	25.5573	18.2143	31.1428	18.3094	11.4428	16.295
C5ar1	135.111	2.2127	0.304632	17.8026	0.0032042	0.051218		76.1691	50.7934	10.378	12.7357	25.0123	356.334	238.922	157.634	122.293	163.878	184.199	141.317	167.697	121.35	88.9312	176.727	202.524
Slc45a4	9.1268	0.152673	0.425588	17.7648	0.00325605	0.0519582		1.00222	8.02001	16.4319	9.79672	9.78743	4.92174	4.64828	8.11352	15.9513	14.3893	9.29444	6.76516	4.39655	5.36945	13.0781	12.7142	10.4754
Sod2	35.2107	0.382988	0.247987	17.7537	0.00327149	0.0521157		24.0534	36.09	25.0802	26.4511	18.4874	34.4522	66.9352	74.1807	29.7757	31.9763	31.2631	27.8123	35.1724	50.4728	28.7719	34.3283	23.2786
Aff1	21.0386	0.314421	0.314818	17.7384	0.00329284	0.0523667		11.0245	10.6933	18.1615	25.4715	33.7122	8.85913	16.7338	23.1815	30.8392	23.9822	26.1934	10.5236	21.9827	9.66501	34.0031	30.5141	22.1146
Rpl4	193.296	0.117916	0.129385	17.674	0.00338402	0.0537257		190.423	243.274	189.399	163.605	140.286	217.541	195.228	201.679	163.767	152.687	174.904	253.318	243.694	235.182	186.581	156.385	178.081
H1f2	32.669	0.52662	0.262233	17.6428	0.00342908	0.0543489		44.0979	12.03	25.0802	34.2885	21.7498	30.5148	27.8897	10.4317	42.5368	37.5721	36.3328	36.8325	40.8251	21.4778	44.4656	36.8712	52.3768
Tor1aip2	52.1514	-0.179084	0.21077	17.6358	0.0034392	0.0544172		34.0756	45.4467	64.8626	73.4754	67.4245	41.3426	35.3269	76.4989	51.0441	55.9585	53.2318	30.0674	30.7758	47.2512	63.6468	52.1282	64.0161
Bach1	24.1495	-0.26814	0.267495	17.6033	0.00348691	0.0550791		19.0423	22.7234	37.1879	39.1869	27.1873	14.7652	11.1559	26.6587	26.5855	27.1798	21.1237	14.282	13.1896	16.1084	34.875	26.6998	32.59
Ybx3	21.4285	-0.518068	0.336261	17.5124	0.00362389	0.0571464		39.0868	50.7934	7.78351	13.7154	23.9248	29.5304	26.0304	22.0224	18.0781	8.79347	17.7439	12.027	23.2389	26.8473	18.3094	8.89994	17.4589
Rps17	239.41	0.0372173	0.122145	17.4466	0.00372625	0.0586618		227.505	280.7	234.37	214.548	189.224	270.696	251.007	280.496	226.508	193.456	235.741	293.157	240.554	300.689	258.947	177.999	194.376
Hlx	11.7966	-0.56425	0.432916	17.4263	0.00375838	0.0590684		7.01557	8.02001	15.567	13.7154	21.7498	10.8278	4.64828	12.7498	20.205	23.1828	10.1394	1.50337	5.02462	2.14778	14.8219	15.257	13.9671
Hspa9	53.767	-0.0895155	0.188996	17.3457	0.0038888	0.0610157		75.1668	74.8534	36.323	40.1666	63.0745	53.1548	56.709	48.6811	38.2831	43.1679	59.9914	54.1213	64.064	69.8029	37.4906	41.9568	57.0325
BC028528	19.7209	0.189228	0.304714	17.3089	0.00394972	0.061868		20.0445	5.34667	23.3505	23.5121	31.5373	9.84348	13.9448	9.27259	22.3318	26.3804	18.5889	12.7786	13.1896	19.33	23.5406	34.3283	27.9343
Tes	11.6772	0.294379	0.41205	17.3016	0.00396198	0.0619564		24.0534	16.04	5.18901	3.91869	4.34997	12.7965	20.4524	16.227	9.57077	10.3923	5.06969	11.2753	15.702	16.1084	13.0781	3.81426	10.4754
Aopep	52.892	-0.104636	0.209323	17.2666	0.00402104	0.0626706		85.1891	77.5267	37.1879	30.3698	45.6747	52.1705	65.0759	61.4309	49.9807	43.9674	43.0924	67.6516	59.0393	56.9162	37.4906	44.4997	41.9014
Nupr1	12.5374	0.298585	0.458305	17.2684	0.00401796	0.0626706		3.00667	1.33667	11.2428	20.5731	29.3623	2.95304	22.3117	4.6363	11.6976	15.9881	15.2091	9.02021	11.9335	7.51723	10.4625	11.4428	24.4425
Aldoa	322.121	0.547004	0.176378	17.2502	0.004049	0.0628385		306.681	378.277	195.453	146.951	175.086	416.379	358.847	470.584	360.499	273.397	366.708	275.868	280.751	449.96	431.578	303.869	285.162
Igf2r	21.5832	-1.19188	0.294662	17.2484	0.00405193	0.0628385		38.0845	50.7934	30.2692	22.5325	23.9248	23.6244	16.7338	20.8633	18.0781	8.79347	17.7439	24.0539	20.7266	21.4778	18.3094	5.08568	5.81964
Tmem176a	3.79484	-1.3148	0.709267	17.2516	0.00404659	0.0628385		2.00445	6.68334	0.864834	11.7561	11.9624	0.984348	1.85931	3.47722	2.12684	6.39525	2.53485	0	1.88423	1.07389	0	5.08568	5.81964
Fem1c	14.9339	-0.111616	0.329169	17.1757	0.0041783	0.0646911		8.0178	12.03	17.2967	20.5731	23.9248	10.8278	6.50759	8.11352	22.3318	18.3863	21.9687	9.7719	11.3054	8.59112	15.6937	15.257	23.2786
Ctsl	1210.83	0.917935	0.168236	17.1433	0.00423585	0.0651513		1480.29	1301.91	686.678	566.25	614.433	1071.96	1085.84	921.464	891.145	816.194	983.52	1838.62	1862.88	1930.85	1727.18	1457.05	1347.83
Dmpk	5.93701	2.531	1.02248	17.1488	0.00422599	0.0651513		1.00222	1.33667	0	0	0	37.4052	18.5931	10.4317	8.50735	1.59881	0.844949	4.51011	5.02462	4.29556	2.61562	1.27142	3.49178
Dnajc3	21.4772	-0.0500538	0.284075	17.146	0.00423105	0.0651513		20.0445	32.08	22.4857	11.7561	17.3999	16.7339	27.8897	42.8857	23.3952	16.7875	16.054	21.0472	19.4704	31.1428	18.3094	10.1714	17.4589
Trim12c	9.733	0.134627	0.399855	17.15	0.00422387	0.0651513		6.01335	8.02001	12.1077	12.7357	15.2249	0.984348	2.78897	11.5907	11.6976	12.7905	10.1394	4.51011	6.90886	8.59112	9.59062	17.7999	13.9671
Ccl8	4.08084	-3.32692	0.897458	17.1244	0.00426989	0.0654794		1.00222	0	6.05384	34.2885	18.4874	0	0.929656	0	1.06342	1.59881	2.53485	0.751684	0.628078	0	0.871875	0	1.16393
Nrp2	62.1497	-0.295606	0.175558	17.1237	0.00427115	0.0654794		89.198	73.5167	63.9977	52.9023	59.812	82.6853	72.5132	55.6356	49.9807	55.9585	46.4722	74.4168	74.7413	64.4334	47.9531	45.7711	46.5571
Dram2	40.167	0.242094	0.220882	17.0788	0.00435282	0.0666223		24.0534	22.7234	43.2417	54.8616	43.4997	35.4365	28.8193	39.4085	37.2197	55.159	43.0924	27.8123	35.1724	40.8078	44.4656	68.6567	38.4096
Gpnmb	3373.08	0.35994	0.128384	17.0585	0.00439017	0.0669751		3552.89	3173.25	4403.74	2948.81	2122.78	2641.99	2495.2	2931.3	3129.64	2677.21	2702.99	3880.2	3686.82	4645.65	5088.26	4404.2	2857.44
Rpn1	38.6864	-0.633245	0.224326	17.059	0.00438932	0.0669751		47.1045	82.8734	51.0252	36.2479	23.9248	38.3896	34.3973	57.9537	43.6002	32.7757	27.8833	33.8258	26.3793	34.3645	33.1312	30.5141	23.2786
Eef1a1	1493.71	0.255972	0.0981909	17.0407	0.00442333	0.0672978		1424.16	1542.51	1471.95	1233.41	1272.37	1553.3	1522.78	1527.66	1372.87	1115.97	1242.07	1652.2	1772.44	1957.7	1958.23	1485.02	1288.47
Xbp1	38.6278	-0.210007	0.249195	17.0394	0.00442569	0.0672978		52.1157	49.4567	47.5659	34.2885	22.8373	29.5304	29.749	62.59	48.9173	28.7786	41.4025	18.7921	24.495	62.2856	40.9781	27.9712	34.9178
Kif21b	4.45306	-0.629179	0.612509	17.0285	0.00444613	0.067499		11.0245	8.02001	3.45934	1.95934	3.26248	9.84348	5.57794	2.31815	2.12684	0	1.6899	6.76516	8.16502	4.29556	3.4875	2.54284	1.16393
Amdhd2	30.6331	-0.140062	0.229607	17.0093	0.00448228	0.0677464		28.0623	21.3867	49.2956	33.3088	40.2372	20.6713	25.1007	20.8633	44.6636	24.7816	32.953	24.8056	24.495	21.4778	41.85	33.0569	33.7539
Gas6	119.565	-0.0147621	0.169314	17.0083	0.00448412	0.0677464		126.28	97.5768	185.075	121.479	97.8743	125.012	128.293	101.999	92.5175	75.9436	81.1151	183.411	151.367	126.719	136.012	116.971	84.9668
Hmgcr	13.0609	-0.172643	0.359892	17.0148	0.00447176	0.0677464		24.0534	18.7134	18.1615	8.81705	4.34997	10.8278	22.3117	8.11352	11.6976	9.59288	5.91464	18.0404	21.3547	11.8128	11.3344	7.62852	9.31143
Gar1	4.50751	-0.686769	0.704659	16.9719	0.00455333	0.0686812		9.02002	9.35668	0.864834	0.979672	1.08749	12.7965	8.3669	4.6363	3.19026	5.59585	3.37979	5.26179	5.6527	4.29556	0.871875	1.27142	0
Gm49391	5.78297	-0.223407	0.613248	16.9675	0.00456183	0.0686988		6.01335	0	2.5945	5.87803	5.43746	13.7809	18.5931	6.95444	1.06342	7.19466	3.37979	9.02021	8.16502	3.22167	0.871875	3.81426	2.32786
Lyn	50.4598	-0.431052	0.2464	16.9478	0.00459991	0.069161		31.069	40.1	57.9439	80.3331	86.9993	35.4365	47.4124	66.0672	72.3125	51.9614	44.7823	20.2955	27.0074	34.3645	42.7219	58.4853	60.5243
Nudt9	23.2909	0.573216	0.290438	16.9374	0.00462011	0.0693535		8.0178	14.7033	19.0264	18.6138	30.4498	15.7496	23.2414	25.4996	39.3465	26.3804	27.0384	12.7786	16.33	19.33	30.5156	30.5141	38.4096
Scoc	17.0747	0.66905	0.376007	16.9335	0.00462757	0.0693543		18.04	18.7134	9.51318	0.979672	9.78743	27.5618	32.538	22.0224	14.8879	16.7875	8.44949	26.309	25.7512	18.2561	15.6937	6.3571	18.6229
Parvb	17.5011	-0.712459	0.303412	16.9288	0.00463691	0.0693833		29.0645	33.4167	14.7022	14.6951	18.4874	22.64	21.3821	23.1815	10.6342	11.1917	10.9843	21.7989	16.9581	18.2561	13.0781	8.89994	8.1475
Bzw1	53.5275	-0.103561	0.193199	16.9133	0.0046671	0.0695197		76.1691	62.8234	51.8901	40.1666	56.5496	47.2487	72.5132	53.3174	35.0928	43.1679	45.6272	58.6314	81.6502	54.7684	40.9781	52.1282	37.2457
Mcm6	17.2319	-0.763766	0.321255	16.9102	0.00467336	0.0695197		16.0356	45.4467	22.4857	8.81705	19.5749	15.7496	15.8041	27.8178	15.9513	15.1887	12.6742	15.7854	10.6773	22.5517	11.3344	8.89994	8.1475
Rbm3	119.245	-0.177719	0.178239	16.909	0.00467571	0.0695197		134.298	171.093	94.2669	125.398	120.712	135.84	138.519	121.703	110.596	74.3448	83.6499	121.021	163.3	150.345	123.806	68.6567	89.6225
Tnfrsf26	7.18077	0.38775	0.612026	16.9186	0.00465678	0.0695197		13.0289	6.68334	0.864834	0	7.61244	12.7965	8.3669	8.11352	4.25368	8.79347	5.06969	9.02021	15.0739	11.8128	0	1.27142	9.31143
Bcl2l11	24.0724	-0.108639	0.273055	16.8633	0.00476639	0.0707347		16.0356	18.7134	29.4044	33.3088	40.2372	14.7652	18.5931	19.7043	32.966	20.7846	21.1237	12.027	15.702	16.1084	34.0031	34.3283	31.4261
Stom	70.7393	0.468939	0.191972	16.8603	0.00477253	0.0707347		46.1023	38.7634	89.9428	71.5161	65.2495	45.28	52.9904	75.3398	91.454	76.743	61.6813	65.3966	75.9974	65.5073	92.4187	119.513	68.6718
Ctsb	4209.67	-0.11212	0.084881	16.8448	0.00480382	0.071086		4778.61	4039.41	5355.92	5615.48	4863.26	3073.14	3031.61	2830.46	3607.12	3714.04	3737.21	4199.66	4142.18	4226.83	4890.34	5161.96	4297.22
Ptges3	43.5659	0.0204952	0.223935	16.8358	0.00482188	0.0712406		50.1112	80.2001	30.2692	22.5325	40.2372	45.28	51.1311	48.6811	30.8392	37.5721	41.4025	42.846	50.2462	62.2856	34.875	40.6854	31.4261
Use1	42.6944	0.209456	0.216516	16.831	0.00483167	0.0712729		18.04	38.7634	38.9175	65.638	41.3247	34.4522	35.3269	39.4085	40.4099	64.7519	46.4722	38.3359	38.3128	39.7339	37.4906	57.2139	51.2128
Cdt1	13.1524	-1.07227	0.390069	16.7914	0.00491294	0.0722441		34.0756	18.7134	7.78351	16.6544	20.6623	16.7339	14.8745	12.7498	9.57077	0.799406	8.44949	12.7786	18.2143	10.7389	5.23125	5.08568	10.4754
Gpr84	2.67046	-1.31837	1.00058	16.7924	0.00491074	0.0722441		7.01557	5.34667	0	0.979672	1.08749	0	13.0152	8.11352	1.06342	0	4.22474	1.50337	1.88423	0	0	0	1.16393
Prdx6	35.4873	0.0845496	0.28472	16.7615	0.00497509	0.0730434		43.0957	88.2201	26.8099	17.6341	13.0499	37.4052	39.0455	41.7267	27.6489	33.5751	23.6586	31.5707	35.1724	48.3251	29.6437	31.7855	34.9178
Myl12a	105.311	-0.195081	0.151336	16.7152	0.00507281	0.0743615		138.307	145.697	92.5373	93.0688	96.7868	117.137	129.222	124.021	82.9467	74.3448	98.859	99.974	104.261	119.202	101.137	75.0138	97.77
Tmem106a	102.809	-0.112942	0.155442	16.7047	0.00509525	0.0745737		90.2002	101.587	136.644	137.154	113.099	69.8887	74.3725	81.1352	109.532	114.315	92.0994	102.981	77.8817	85.9112	149.091	96.6279	115.229
Fam241a	13.4026	0.449156	0.351131	16.6386	0.00523875	0.0765543		9.02002	17.3767	14.7022	16.6544	5.43746	3.93739	11.1559	24.3406	12.761	9.59288	10.1394	8.26853	11.3054	23.6256	17.4375	21.6141	10.4754
Kcnk13	12.2271	0.303981	0.393173	16.6035	0.00531653	0.07757		17.0378	16.04	5.18901	5.87803	7.61244	17.7183	28.8193	10.4317	4.25368	6.39525	10.9843	15.7854	18.2143	9.66501	9.59062	11.4428	12.8032
Uqcr11	70.7562	0.156354	0.194014	16.5888	0.00534951	0.0779298		62.1379	86.8834	89.0779	45.0649	56.5496	59.0609	85.5283	93.885	58.4881	63.1531	49.007	78.1752	73.4851	112.758	81.0843	44.4997	64.0161
Klra3	5.03926	1.03065	0.642089	16.5726	0.00538585	0.0783374		3.00667	0	0.864834	5.87803	3.26248	3.93739	5.57794	2.31815	6.38051	12.7905	11.8293	4.51011	3.14039	0	5.23125	7.62852	9.31143
Utp15	4.71682	-0.520068	0.638898	16.4939	0.00556678	0.0808434		9.02002	2.67334	2.5945	3.91869	4.34997	9.84348	8.3669	1.15907	6.38051	4.79644	0.844949	9.7719	10.0492	1.07389	1.74375	1.27142	2.32786
Mill2	3.62666	-0.692771	0.671181	16.4458	0.00568002	0.0823603		1.00222	1.33667	8.64834	9.79672	4.34997	2.95304	0.929656	0	7.44393	4.79644	2.53485	3.75842	1.25616	1.07389	4.35937	5.08568	2.32786
Tuba4a	6.19126	0.74801	0.558586	16.4163	0.00575082	0.083258		6.01335	12.03	1.72967	0	3.26248	4.92174	7.43725	13.9089	4.25368	3.19763	6.75959	11.2753	8.16502	10.7389	4.35937	2.54284	4.65571
Atf3	98.594	-0.412883	0.168764	16.4081	0.00577066	0.0834163		180.4	106.933	91.6724	138.134	135.936	49.2174	98.5435	64.9081	60.6149	92.7311	106.464	85.692	105.517	73.0245	93.2906	94.0851	98.9339
Il1rn	17.1153	-1.02763	0.404638	16.3936	0.00580578	0.0837947		64.1424	36.09	6.05384	16.6544	23.9248	1.9687	15.8041	20.8633	7.44393	18.3863	10.1394	13.5303	13.1896	17.1822	6.10312	10.1714	9.31143
Palld	4.47606	-0.849042	0.731831	16.3856	0.00582531	0.0839471		9.02002	12.03	1.72967	0	3.26248	15.7496	5.57794	4.6363	1.06342	1.59881	2.53485	4.51011	8.16502	0	2.61562	1.27142	2.32786
Arhgap18	18.2848	-0.0869327	0.33098	16.3678	0.00586877	0.0844436		9.02002	8.02001	19.8912	22.5325	28.2748	15.7496	12.0855	11.5907	28.7123	30.3774	32.108	18.0404	16.33	7.51723	10.4625	20.3427	19.7868
Tent5c	9.12525	0.512469	0.495136	16.32	0.0059875	0.0858881		7.01557	4.01	6.91868	9.79672	6.52495	5.90609	24.1711	9.27259	4.25368	3.99703	1.6899	12.027	28.2635	9.66501	7.84687	11.4428	2.32786
Tmem50a	107.346	0.0295885	0.169153	16.3202	0.00598705	0.0858881		90.2002	88.2201	154.805	128.337	82.6494	99.4192	93.8952	95.0441	157.386	87.1353	84.4949	118.014	90.4432	94.5023	118.575	147.485	94.2782
Serpinb6a	280.609	0.263594	0.132951	16.3039	0.00602797	0.0863364		299.665	179.113	339.88	240.02	262.086	297.273	277.967	164.589	249.903	296.58	239.965	331.493	325.344	267.399	336.544	361.083	301.457
Lmnb1	2.15627	0.281572	1.01553	16.2874	0.00606964	0.0866682		4.0089	4.01	0	0	1.08749	2.95304	0.929656	6.95444	0	0	1.6899	7.51684	4.39655	1.07389	0.871875	0	1.16393
Pacsin2	23.7052	-0.455435	0.28236	16.2903	0.00606228	0.0866682		35.0779	26.7334	20.756	21.5528	17.3999	40.3583	24.1711	22.0224	19.1415	36.7727	16.899	34.5775	23.2389	13.9606	15.6937	24.157	10.4754
Wwp1	44.7002	-0.228184	0.221742	16.2722	0.00610841	0.087089		25.0556	32.08	79.5648	60.7397	67.4245	36.4209	30.6786	25.4996	45.727	47.9644	49.852	46.6044	37.6847	34.3645	42.7219	52.1282	45.3932
Dbnl	30.7456	-0.417348	0.256607	16.265	0.00612683	0.0872188		29.0645	20.05	51.8901	54.8616	33.7122	18.7026	19.5228	30.1359	46.7904	27.1798	27.0384	23.3022	15.702	19.33	34.875	35.5998	34.9178
H2-M3	19.0448	-0.393478	0.322891	16.2581	0.00614455	0.0873384		11.0245	6.68334	19.0264	42.1259	38.0622	11.8122	14.8745	18.5452	21.2684	21.584	25.3485	11.2753	10.6773	13.9606	14.8219	22.8856	19.7868
Smad6	2.75453	1.2064	0.963306	16.2498	0.00616599	0.0875103		2.00445	2.67334	0	0.979672	0	11.8122	4.64828	3.47722	0	0.799406	0.844949	6.01348	6.28078	3.22167	1.74375	0	2.32786
Csf3r	8.96474	-0.834866	0.494303	16.238	0.00619655	0.087811		7.01557	1.33667	20.756	21.5528	22.8373	0.984348	6.50759	3.47722	13.8244	7.99406	5.91464	2.25505	3.14039	7.51723	6.10312	16.5285	4.65571
Igf1	166.419	-0.369875	0.170447	16.234	0.00620667	0.0878216		241.536	308.77	177.291	133.235	158.774	129.934	154.323	213.27	148.879	120.71	147.866	118.014	110.542	184.709	169.144	139.856	172.261
Pimreg	2.11084	-0.117143	0.90137	16.2119	0.00626432	0.0885035		2.00445	4.01	2.5945	0.979672	0	4.92174	1.85931	2.31815	2.12684	0	0	5.26179	3.76847	4.29556	1.74375	0	0
Eif4e	25.4056	-0.175423	0.27069	16.1951	0.00630865	0.0889956		36.0801	33.4167	9.51318	16.6544	30.4498	37.4052	34.3973	31.295	18.0781	19.9852	30.4182	27.0606	28.8916	23.6256	18.3094	16.5285	19.7868
Mcm5	6.39425	-0.406055	0.521002	16.185	0.0063352	0.0892359		8.0178	18.7134	7.78351	2.93902	4.34997	5.90609	10.2262	4.6363	6.38051	0.799406	0.844949	6.01348	6.90886	9.66501	9.59062	1.27142	4.65571
C3ar1	320.005	-0.357262	0.133241	16.1802	0.00634795	0.0892812		366.814	411.694	344.204	417.34	408.897	217.541	256.585	286.291	341.358	331.754	288.972	214.23	214.175	266.325	360.956	392.869	320.08
Ccl4	56.2755	-0.357953	0.265435	16.1376	0.00646207	0.090614		41.0912	34.7534	52.7549	110.703	100.049	27.5618	84.5987	66.0672	39.3465	71.1472	47.3171	30.0674	47.7339	38.66	36.6187	57.2139	70.9996
Dbi	58.3282	-0.0754525	0.202864	16.1383	0.00646025	0.090614		66.1468	82.8734	64.8626	45.0649	36.9747	65.9513	85.5283	53.3174	51.0441	45.5662	48.1621	65.3966	67.2044	74.0984	53.1844	55.9425	30.2621
Naa20	37.1476	0.307459	0.226042	16.1157	0.00652139	0.0913092		46.1023	40.1	19.0264	25.4715	33.7122	44.2957	40.9049	45.2039	31.9026	22.3834	25.3485	55.6247	47.1059	51.5467	28.7719	35.5998	38.4096
Coq10b	6.55673	0.433035	0.513341	16.1115	0.0065329	0.0913339		11.0245	5.34667	1.72967	4.89836	4.34997	9.84348	13.0152	3.47722	1.06342	7.99406	2.53485	9.7719	13.8177	7.51723	5.23125	6.3571	3.49178
Card19	43.5887	0.112766	0.240404	16.0924	0.00658519	0.0919277		64.1424	66.8334	25.945	29.3902	26.0998	61.0296	45.5531	44.0448	24.4586	30.3774	44.7823	48.8595	57.1551	44.0295	33.1312	38.1426	57.0325
Cdk6	18.5754	-0.326035	0.325419	16.0551	0.00668842	0.0932298		37.0823	25.3967	10.378	17.6341	11.9624	17.7183	33.4676	17.3861	11.6976	19.9852	14.3641	25.5573	21.9827	17.1822	11.3344	6.3571	16.295
Ccnb2	2.74339	-0.201908	0.877179	16.048	0.00670822	0.0933669		1.00222	5.34667	7.78351	0.979672	0	3.93739	3.71862	0	1.06342	0.799406	0	7.51684	6.90886	3.22167	4.35937	0	0
Ewsr1	30.7225	-0.153602	0.241457	16.0226	0.00677994	0.0942251		49.109	24.06	25.945	24.4918	41.3247	28.5461	39.9752	17.3861	22.3318	35.9733	33.7979	31.5707	37.6847	19.33	19.1812	34.3283	37.2457
Pla2g15	45.3819	-0.159818	0.206005	16.0125	0.00680852	0.0944821		38.0845	53.4667	56.2142	55.8413	53.2871	37.4052	19.5228	39.4085	42.5368	47.165	58.3015	33.0741	31.4039	37.5862	54.0562	55.9425	58.1964
Ephx1	23.321	1.54229	0.337356	15.9933	0.00686332	0.0951017		12.0267	5.34667	8.64834	18.6138	5.43746	32.4835	26.0304	15.068	20.205	43.1679	33.7979	18.0404	22.6108	17.1822	24.4125	44.4997	48.885
Zranb3	7.91459	-0.524648	0.473498	15.9708	0.00692799	0.095856		14.0311	18.7134	3.45934	2.93902	9.78743	9.84348	5.57794	13.9089	4.25368	2.39822	10.1394	7.51684	8.79309	11.8128	5.23125	3.81426	2.32786
Frmd4b	12.9599	-0.533637	0.358251	15.9375	0.00702482	0.0970524		6.01335	8.02001	23.3505	21.5528	23.9248	9.84348	8.3669	9.27259	20.205	13.5899	10.9843	8.26853	4.39655	10.7389	17.4375	12.7142	11.6393
Rab7b	57.1157	-0.310218	0.190464	15.9088	0.00710937	0.0980758		94.2091	77.5267	46.7011	54.8616	68.512	51.1861	49.2718	49.8402	44.6636	35.1739	53.2318	72.9134	63.4359	70.8767	36.6187	35.5998	66.3439
Snx3	103.838	-0.140554	0.142097	15.9016	0.00713084	0.0982274		126.28	117.627	113.293	96.0079	90.2618	126.981	122.715	96.2031	95.7077	85.5365	73.5105	124.78	116.194	106.315	101.137	87.728	84.9668
Lrrc59	39.0364	-0.187185	0.255485	15.8629	0.00724674	0.0996773		51.1134	84.2101	22.4857	24.4918	35.8872	46.2644	48.3421	39.4085	37.2197	23.9822	32.108	29.3157	39.5689	54.7684	26.1562	36.8712	31.4261
Lsp1	26.2889	0.49979	0.325487	15.8454	0.0072996	0.100257		10.0222	2.67334	36.323	24.4918	39.1497	24.6087	20.4524	16.227	26.5855	41.5691	31.2631	29.3157	28.2635	19.33	20.925	41.9568	33.7539
Rasa4	38.3705	-0.173078	0.267093	15.8059	0.00742064	0.10177		25.0556	25.3967	74.3758	56.821	46.7621	11.8122	24.1711	46.363	45.727	51.9614	30.4182	32.3224	28.2635	33.2906	37.4906	48.3139	33.7539
Trim21	9.66159	-0.406616	0.464587	15.7717	0.00752698	0.103078		1.00222	12.03	11.2428	20.5731	14.1374	7.87479	6.50759	5.79537	18.0781	11.9911	5.06969	3.00674	3.14039	4.29556	11.3344	16.5285	11.6393
Ikbke	19.2694	-0.0911434	0.376111	15.7532	0.00758503	0.103721		8.0178	4.01	19.8912	24.4918	42.4122	8.85913	24.1711	26.6587	26.5855	30.3774	19.4338	7.51684	12.5616	8.59112	16.5656	24.157	23.2786
Hk3	60.6393	-0.408814	0.194542	15.7462	0.00760744	0.103876		94.2091	81.5367	84.7538	64.6583	50.0246	47.2487	45.5531	69.5444	59.5515	41.5691	39.7126	69.155	45.8497	86.9851	68.8781	43.2283	38.4096
Fcgr3	159.649	0.251785	0.152359	15.7117	0.00771735	0.10507		178.396	128.32	149.616	115.601	100.049	222.463	198.017	137.93	127.61	156.684	173.214	232.271	183.399	169.675	148.219	156.385	136.18
Fxyd5	199.757	0.301934	0.170465	15.7136	0.00771119	0.10507		98.218	101.587	208.425	243.938	231.636	179.151	183.142	205.156	224.381	237.424	237.431	224.002	169.581	185.783	201.403	236.484	228.13
Rps26	200.676	0.209021	0.126844	15.6578	0.00789202	0.107293		202.449	243.274	175.561	163.605	166.386	175.214	224.977	209.792	197.796	166.277	168.99	230.767	232.389	274.916	239.766	158.927	180.409
Srebf2	22.3851	-0.694669	0.302469	15.6474	0.00792645	0.107604		37.0823	34.7534	36.323	34.2885	11.9624	22.64	32.538	10.4317	14.8879	13.5899	10.1394	22.5505	28.8916	25.7734	11.3344	22.8856	10.4754
Bcl2	1.77234	-0.654254	1.07078	15.6438	0.00793812	0.107607		4.0089	5.34667	0	0	1.08749	2.95304	1.85931	3.47722	0	1.59881	0	4.51011	3.14039	2.14778	0	0	0
H2az2	15.052	-0.0441435	0.341394	15.605	0.00806716	0.109198		16.0356	9.35668	30.2692	18.6138	6.52495	20.6713	13.0152	10.4317	15.9513	10.3923	6.75959	17.2887	20.0985	16.1084	26.1562	8.89994	9.31143
Nme2	142.763	0.0912693	0.146325	15.5471	0.00826358	0.111695		156.347	177.777	152.211	127.357	92.4368	126.981	147.815	165.748	128.674	123.109	120.828	175.142	167.697	177.192	164.784	102.985	119.885
Lmna	84.8449	0.214797	0.195875	15.5372	0.00829752	0.111993		128.285	102.923	70.9164	44.0852	61.987	93.5131	97.6139	81.1352	48.9173	66.3507	74.3555	113.504	116.194	83.7634	82.8281	99.1707	76.8193
Rps7	211.879	0.0473581	0.121992	15.5152	0.00837353	0.112856		236.525	261.987	202.371	179.28	193.574	194.901	205.454	228.338	187.162	163.079	193.493	262.338	239.926	280.285	218.841	185.627	168.77
Ptpn6	45.7033	-0.12469	0.240439	15.5012	0.00842233	0.113188		33.0734	30.7434	46.7011	78.3738	53.2871	29.5304	26.0304	61.4309	64.8686	53.5602	58.3015	27.8123	38.9408	27.9211	46.2094	55.9425	44.2293
Tspo	86.8288	-0.199486	0.187233	15.5038	0.00841328	0.113188		52.1157	69.5067	111.564	145.971	102.224	71.8574	65.0759	88.0896	112.722	109.519	77.7353	71.41	73.4851	63.3595	79.3406	88.9994	93.1143
Abcc1	13.1831	0.0547275	0.401321	15.4903	0.00846057	0.113539		28.0623	12.03	3.45934	6.8577	8.69993	15.7496	21.3821	27.8178	7.44393	7.99406	15.2091	14.282	11.3054	17.1822	9.59062	8.89994	8.1475
Ypel3	24.6357	0.249509	0.269362	15.4475	0.00861205	0.115406		17.0378	12.03	32.8637	28.4105	30.4498	13.7809	14.8745	18.5452	22.3318	28.7786	28.7283	31.5707	14.4458	20.4039	31.3875	39.414	33.7539
Man2a2	7.98124	1.06689	0.484614	15.4346	0.00865801	0.115857		6.01335	1.33667	10.378	4.89836	2.17498	2.95304	5.57794	5.79537	15.9513	15.9881	9.29444	6.01348	6.90886	5.36945	17.4375	11.4428	8.1475
Jund	68.4366	0.306512	0.199666	15.4269	0.00868591	0.116064		43.0957	53.4667	48.4307	72.4957	68.512	60.0452	72.5132	56.7946	110.596	72.746	91.2545	53.3696	50.8743	44.0295	84.5718	85.1851	95.4421
Creld1	6.31117	0.9167	0.59623	15.4149	0.00872929	0.116478		4.0089	1.33667	9.51318	1.95934	0	10.8278	7.43725	10.4317	10.6342	0.799406	5.91464	15.7854	6.28078	6.44334	8.71875	2.54284	4.65571
Ankrd13b	3.79711	-0.190974	0.710867	15.4061	0.00876092	0.116568		9.02002	4.01	0.864834	2.93902	3.26248	3.93739	2.78897	8.11352	1.06342	3.19763	0	5.26179	10.0492	6.44334	0	1.27142	2.32786
Atp6v1h	47.5858	0.389267	0.225673	15.407	0.00875763	0.116568		69.1535	46.7834	23.3505	37.2275	25.0123	64.967	52.9904	56.7946	28.7123	34.3745	49.007	60.1348	62.1797	53.6945	42.7219	48.3139	53.5407
Cltc	103.124	-0.267576	0.144146	15.3936	0.00880635	0.116851		149.331	96.2401	129.725	95.0282	115.274	102.372	123.644	71.8626	99.9614	91.9317	89.5646	99.974	119.335	74.0984	107.241	97.8993	89.6225
Creld2	11.4825	-0.0534691	0.394148	15.3934	0.00880719	0.116851		9.02002	22.7234	7.78351	8.81705	10.8749	10.8278	12.0855	30.1359	4.25368	8.79347	6.75959	6.76516	11.3054	17.1822	12.2062	6.3571	9.31143
Tbc1d17	10.7214	0.379428	0.410045	15.3836	0.00884297	0.11716		7.01557	0	14.7022	11.7561	10.8749	7.87479	8.3669	9.27259	13.8244	14.3893	17.7439	10.5236	6.90886	3.22167	16.5656	15.257	13.9671
Gnas	249.809	-0.305655	0.137493	15.3784	0.00886202	0.117247		309.687	253.967	349.393	317.414	249.036	212.619	163.619	210.951	278.616	246.217	223.911	195.438	180.258	226.591	298.181	317.855	212.999
Tmem184b	26.5192	-0.0795479	0.27192	15.3601	0.00892959	0.117974		21.0467	18.7134	29.4044	23.5121	35.8872	17.7183	21.3821	31.295	48.9173	32.7757	29.5732	16.5371	12.5616	20.4039	38.3625	31.7855	20.9507
Itgax	2.81197	-1.79207	0.842412	15.3402	0.00900344	0.118782		6.01335	17.3767	2.5945	0.979672	2.17498	1.9687	3.71862	1.15907	0	0	0	3.75842	3.76847	2.14778	0.871875	1.27142	0
Prex1	27.0753	-0.144035	0.268893	15.3194	0.00908118	0.119639		14.0311	18.7134	36.323	37.2275	40.2372	22.64	18.5931	32.4541	21.2684	23.1828	43.9373	16.5371	16.33	28.995	27.0281	26.6998	36.0818
Aph1c	28.9238	0.178853	0.285505	15.3128	0.00910615	0.1198		12.0267	14.7033	45.8362	42.1259	43.4997	16.7339	14.8745	13.9089	31.9026	33.5751	27.0384	38.3359	35.8005	19.33	31.3875	36.8712	33.7539
Golt1b	14.1851	0.204635	0.359842	15.2908	0.00918945	0.120726		18.04	28.07	6.05384	5.87803	8.69993	13.7809	18.5931	16.227	8.50735	15.1887	15.2091	13.5303	16.9581	23.6256	6.10312	12.7142	13.9671
Gm10184	11.3229	0.399412	0.412922	15.2077	0.00951084	0.124773		13.0289	13.3667	8.64834	2.93902	4.34997	14.7652	20.4524	11.5907	11.6976	7.19466	9.29444	24.0539	15.702	11.8128	6.975	3.81426	12.8032
Mknk1	15.3958	-0.504241	0.337089	15.1837	0.00960539	0.125837		10.0222	10.6933	23.3505	24.4918	16.3124	17.7183	12.0855	11.5907	25.5221	21.584	13.5192	12.027	4.39655	8.59112	13.0781	21.6141	15.1311
Cd44	98.9651	0.495484	0.189694	15.1734	0.00964647	0.126199		110.245	96.2401	64.8626	47.0243	54.3746	153.558	135.73	84.6124	93.5809	93.5306	98.859	120.27	142.574	84.8373	89.8031	115.699	96.606
Mpc1	54.4545	-0.289389	0.195339	15.1405	0.00977863	0.12775		79.1757	72.1801	69.1868	60.7397	46.7621	46.2644	46.4828	53.3174	60.6149	33.5751	31.2631	48.8595	61.5517	81.6156	59.2875	31.7855	43.0653
Bri3	181.99	-0.149224	0.1571	15.0997	0.00994455	0.129728		131.291	113.617	241.289	244.918	264.26	165.371	165.479	159.952	191.415	189.459	184.199	176.646	155.135	140.68	173.503	189.442	207.179
Nub1	34.9008	0.49273	0.240505	15.0965	0.00995775	0.129728		14.0311	14.7033	40.6472	34.2885	33.7122	28.5461	29.749	39.4085	54.2344	41.5691	46.4722	28.564	28.2635	32.2167	39.2344	45.7711	41.9014
Actn1	43.6427	-0.163008	0.231076	15.0753	0.0100456	0.13069		66.1468	76.1901	25.945	32.3292	31.5373	44.2957	59.498	48.6811	38.2831	35.9733	42.2474	45.1011	38.3128	55.8423	37.4906	27.9712	36.0818
Mcfd2	42.8694	0.344413	0.219343	15.0707	0.0100644	0.130754		46.1023	44.11	32.8637	26.4511	26.0998	58.0765	61.3573	44.0448	35.0928	38.3715	38.8676	51.1145	62.8078	53.6945	46.2094	21.6141	41.9014
Siglec1	5.41906	-0.476085	0.547734	15.0488	0.0101558	0.131745		4.0089	0	8.64834	13.7154	8.69993	5.90609	1.85931	2.31815	4.25368	6.39525	5.91464	3.00674	1.88423	2.14778	6.10312	11.4428	5.81964
Tpcn1	25.3701	-0.0643811	0.273548	15.0457	0.0101688	0.131745		15.0334	14.7033	44.9714	40.1666	32.6248	22.64	20.4524	9.27259	23.3952	24.7816	13.5192	33.0741	28.2635	19.33	37.4906	31.7855	19.7868
Cnp	11.4054	-0.279815	0.456746	15.0037	0.0103465	0.133861		0	9.35668	20.756	15.6748	19.5749	9.84348	5.57794	17.3861	18.0781	14.3893	6.75959	6.01348	5.6527	3.22167	18.3094	13.9856	9.31143
Canx	112.77	0.0059604	0.157587	14.9956	0.0103811	0.134124		89.198	140.35	162.589	100.906	90.2618	90.56	105.981	135.612	130.801	90.3329	106.464	102.981	128.756	126.719	131.653	96.6279	87.2946
Fasn	7.62625	-0.301126	0.5145	14.968	0.0104997	0.13547		13.0289	6.68334	6.91868	5.87803	1.08749	13.7809	17.6635	9.27259	2.12684	4.79644	9.29444	9.02021	12.5616	8.59112	1.74375	2.54284	4.65571
Tmed2	91.1022	0.0450698	0.155421	14.9484	0.0105851	0.136383		79.1757	112.28	105.51	81.3128	70.687	95.4818	83.669	113.589	103.152	73.5454	74.3555	85.692	93.5836	125.645	97.65	66.1138	87.2946
Slc7a11	2.00539	-1.24587	1.05268	14.9381	0.0106302	0.136776		12.0267	4.01	0.864834	0	0	1.9687	3.71862	4.6363	0	0	0.844949	0	2.51231	1.07389	0	1.27142	1.16393
Rpl22l1	34.6269	-0.088052	0.251682	14.9343	0.0106468	0.136802		62.1379	30.7434	43.2417	30.3698	22.8373	29.5304	35.3269	40.5676	31.9026	19.1858	20.2788	46.6044	32.6601	44.0295	53.1844	21.6141	24.4425
Rnaset2a	94.3695	0.272577	0.209411	14.9263	0.010682	0.137066		50.1112	38.7634	99.456	132.256	115.274	79.7322	104.121	92.7259	86.1369	128.704	101.394	66.8999	86.6748	85.9112	116.831	115.699	103.59
Atp5g3	90.8932	-0.340227	0.170881	14.9212	0.0107043	0.137164		133.296	139.013	76.9703	89.1501	81.5619	111.231	92.9656	70.7035	81.8833	64.7519	86.1848	109.746	98.6083	96.6501	69.75	63.571	79.1471
Snord3b3	7.85816	1.99088	0.646372	14.882	0.0108786	0.139208		0	8.02001	1.72967	2.93902	0	16.7339	10.2262	23.1815	11.6976	3.99703	1.6899	11.2753	14.4458	9.66501	6.975	6.3571	4.65571
AB124611	17.2776	-0.197672	0.313634	14.8601	0.0109769	0.140274		7.01557	12.03	32.8637	28.4105	27.1873	12.7965	8.3669	9.27259	15.9513	15.1887	20.2788	15.0337	11.9335	15.0345	21.7969	25.4284	15.1311
Plec	41.802	-0.216097	0.241877	14.8555	0.0109981	0.140353		53.1179	53.4667	24.2154	41.1462	45.6747	42.327	70.6538	39.4085	44.6636	31.1769	30.4182	49.6112	63.4359	33.2906	31.3875	22.8856	33.7539
Stard4	5.29731	-1.12537	0.605647	14.8201	0.0111593	0.142217		10.0222	8.02001	9.51318	5.87803	2.17498	9.84348	10.2262	2.31815	1.06342	3.99703	1.6899	5.26179	11.3054	1.07389	5.23125	1.27142	1.16393
Rhov	11.584	0.435615	0.373065	14.8118	0.0111974	0.142509		14.0311	9.35668	6.05384	11.7561	14.1374	1.9687	7.43725	13.9089	7.44393	15.1887	18.5889	6.01348	13.8177	10.7389	11.3344	16.5285	18.6229
Usp25	26.7828	0.084653	0.273375	14.8018	0.0112436	0.142902		14.0311	24.06	24.2154	31.3495	28.2748	25.5931	15.8041	42.8857	39.3465	24.7816	33.7979	17.2887	13.1896	21.4778	29.6437	38.1426	31.4261
Bdh2	1.99356	-0.41823	0.963454	14.7837	0.0113279	0.143778		4.0089	9.35668	0	0	1.08749	1.9687	0.929656	4.6363	1.06342	0	1.6899	0.751684	3.14039	3.22167	0.871875	0	1.16393
Mgst3	36.4704	0.355242	0.272391	14.7571	0.0114522	0.145159		26.0578	49.4567	57.9439	17.6341	19.5749	26.5774	33.4676	39.4085	38.2831	35.9733	25.3485	45.8528	57.7832	54.7684	47.0812	20.3427	24.4425
Snord3b4	8.67003	1.84358	0.586688	14.7502	0.0114848	0.145376		0	8.02001	2.5945	0.979672	2.17498	16.7339	15.8041	23.1815	12.761	7.99406	2.53485	7.51684	15.0739	13.9606	9.59062	3.81426	4.65571
Msn	143.424	0.0744376	0.14459	14.7345	0.0115592	0.14612		142.316	181.787	110.699	130.296	110.924	165.371	155.253	176.179	160.576	112.716	129.277	148.082	168.953	175.044	138.628	129.685	102.426
Nqo2	15.6644	0.488445	0.331332	14.7041	0.0117043	0.147754		16.0356	5.34667	21.6209	13.7154	7.61244	19.687	12.0855	10.4317	23.3952	11.9911	10.9843	22.5505	19.4704	7.51723	26.1562	19.0713	18.6229
Pmepa1	1.72736	-1.58177	1.26938	14.6877	0.0117836	0.148556		6.01335	4.01	0	0	0	8.85913	2.78897	0	2.12684	0.799406	0	2.25505	2.51231	0	0	0	0
Cyria	13.3027	-0.0429126	0.431294	14.6429	0.0120023	0.15081		5.01112	10.6933	11.2428	16.6544	22.8373	8.85913	3.71862	16.227	29.7757	20.7846	11.8293	3.00674	10.6773	5.36945	11.3344	24.157	13.9671
Eepd1	5.30195	0.361995	0.558378	14.6441	0.0119965	0.15081		2.00445	2.67334	8.64834	6.8577	4.34997	1.9687	2.78897	3.47722	4.25368	9.59288	5.91464	3.75842	1.88423	3.22167	8.71875	16.5285	3.49178
Mthfsl	37.992	0.0632829	0.230913	14.6412	0.0120107	0.15081		22.0489	24.06	41.5121	52.9023	56.5496	26.5774	36.2566	25.4996	41.4733	51.162	36.3328	36.0809	35.8005	24.6995	45.3375	40.6854	48.885
1600014C10Rik	8.07984	-0.895989	0.455313	14.6254	0.0120889	0.151589		4.0089	10.6933	18.1615	19.5934	10.8749	0.984348	6.50759	5.79537	10.6342	8.79347	5.06969	3.75842	1.25616	6.44334	11.3344	7.62852	5.81964
Pnpla7	26.2623	0.494414	0.273561	14.6147	0.0121421	0.152053		9.02002	14.7033	39.7824	26.4511	23.9248	25.5931	20.4524	13.9089	35.0928	31.9763	21.1237	32.3224	30.1477	21.4778	40.9781	29.2427	30.2621
Ifrd1	20.0005	-0.618893	0.307175	14.6112	0.0121595	0.152066		33.0734	28.07	12.9725	12.7357	29.3623	17.7183	34.3973	19.7043	17.0147	23.1828	24.5035	15.0337	24.495	10.7389	9.59062	7.62852	19.7868
Hal	6.44594	-0.23741	0.580896	14.5756	0.0123386	0.1541		19.0423	14.7033	2.5945	3.91869	3.26248	2.95304	1.85931	4.6363	1.06342	3.19763	5.06969	11.2753	11.9335	18.2561	3.4875	0	2.32786
Fbxw17	10.7597	-0.445592	0.389638	14.571	0.0123618	0.154185		4.0089	12.03	10.378	18.6138	20.6623	6.89044	4.64828	11.5907	11.6976	14.3893	16.899	6.01348	4.39655	9.66501	11.3344	12.7142	6.98357
Marchf1	10.3668	-1.13367	0.407018	14.5554	0.0124412	0.154665		7.01557	12.03	15.567	19.5934	17.3999	6.89044	6.50759	6.95444	12.761	19.9852	16.054	1.50337	4.39655	5.36945	6.10312	7.62852	10.4754
Psap	1885.82	-0.684636	0.141563	14.5537	0.0124498	0.154665		3250.21	2309.76	3676.41	3126.13	2326.14	831.774	859.932	980.577	1290.99	1501.29	1380.65	1528.17	1536.28	1594.73	1916.38	2137.26	1812.24
Tns3	39.3419	-0.240267	0.223546	14.5591	0.0124221	0.154665		73.1624	54.8034	32.8637	32.3292	34.7997	34.4522	44.6235	47.522	24.4586	24.7816	32.108	48.8595	39.5689	46.1773	34.875	34.3283	29.0982
Actr1b	19.8848	-0.283322	0.311772	14.5488	0.0124746	0.154768		33.0734	30.7434	20.756	9.79672	15.2249	16.7339	33.4676	20.8633	13.8244	19.9852	16.054	22.5505	25.1231	24.6995	14.8219	6.3571	13.9671
Snx7	6.4828	-0.606141	0.491983	14.5317	0.0125623	0.15565		9.02002	16.04	9.51318	2.93902	7.61244	3.93739	2.78897	8.11352	8.50735	1.59881	3.37979	6.76516	6.90886	13.9606	4.35937	1.27142	3.49178
Pik3ap1	113.712	-1.01112	0.17623	14.4709	0.0128795	0.159369		145.323	132.33	133.184	233.162	212.061	92.5287	55.7794	95.0441	122.293	107.92	106.464	68.4033	69.0886	65.5073	88.9312	99.1707	105.917
Esyt1	79.1718	0.250666	0.168458	14.4535	0.0129714	0.160295		73.1624	88.2201	108.104	60.7397	60.8995	55.1235	67.8649	61.4309	102.088	59.9555	71.8206	81.9336	90.4432	107.389	107.241	75.0138	74.4914
P4hb	90.4598	-0.0831053	0.173653	14.4486	0.0129977	0.160407		105.234	125.647	109.834	69.5567	63.0745	103.357	79.9504	108.953	87.2004	70.3478	78.5802	77.4235	83.5344	117.054	104.625	94.0851	59.3603
Tpm2	1.97204	-0.75503	1.06255	14.4453	0.0130149	0.160409		11.0245	6.68334	0	0	0	0	2.78897	2.31815	1.06342	0	2.53485	0.751684	1.88423	2.14778	0	0	2.32786
Lipa	421.066	0.269836	0.149185	14.3888	0.0133194	0.163946		401.892	530.657	348.528	311.536	316.46	357.318	333.746	552.878	470.031	386.913	500.21	321.721	332.881	515.467	489.994	506.025	481.866
Tpst1	8.83433	-0.580654	0.483827	14.3735	0.0134032	0.164761		4.0089	9.35668	13.8374	17.6341	6.52495	1.9687	4.64828	20.8633	17.0147	8.79347	11.8293	1.50337	5.02462	5.36945	3.4875	10.1714	8.1475
Ncl	59.5901	0.0528639	0.226337	14.3637	0.0134568	0.164987		98.218	84.2101	41.5121	33.3088	31.5373	59.0609	73.4428	76.4989	53.171	55.9585	58.3015	77.4235	63.4359	57.9901	51.4406	52.1282	45.3932
Zdhhc18	15.9011	-0.415313	0.342836	14.3642	0.0134542	0.164987		39.0868	14.7033	8.64834	17.6341	20.6623	7.87479	19.5228	17.3861	7.44393	17.5869	19.4338	6.76516	11.9335	19.33	9.59062	15.257	17.4589
Ddx5	140.035	-0.311032	0.171369	14.3289	0.0136496	0.167132		169.376	153.717	146.157	138.134	146.811	163.402	188.72	85.7715	148.879	147.091	120.828	140.565	180.886	76.2462	97.65	143.67	132.688
Anp32e	11.987	-0.31761	0.373522	14.2967	0.0138307	0.169128		13.0289	21.3867	8.64834	7.83738	9.78743	17.7183	14.8745	16.227	13.8244	5.59585	10.1394	16.5371	9.42117	18.2561	9.59062	5.08568	5.81964
Cd276	1.8397	-0.0855696	0.977701	14.2551	0.0140677	0.171719		3.00667	5.34667	0	0.979672	1.08749	0.984348	4.64828	1.15907	0	2.39822	0	1.50337	4.39655	3.22167	0	2.54284	0
Tmem219	34.6284	-0.386203	0.240991	14.2531	0.0140792	0.171719		22.0489	24.06	44.9714	67.5974	48.9371	26.5774	25.1007	37.0904	40.4099	42.3685	32.108	25.5573	24.495	20.4039	34.0031	36.8712	36.0818
Lhpp	6.46523	-0.0834611	0.487087	14.2318	0.0142023	0.172995		6.01335	10.6933	7.78351	2.93902	6.52495	2.95304	8.3669	12.7498	5.3171	1.59881	8.44949	3.75842	6.28078	12.8867	5.23125	2.54284	5.81964
Ppib	107.745	0.203194	0.169382	14.2057	0.0143541	0.174397		78.1735	85.5467	130.59	114.622	90.2618	101.388	100.403	124.021	140.371	94.33	97.1691	78.9269	79.1378	123.497	139.5	151.299	102.426
Rack1	266.635	0.135579	0.12111	14.2056	0.0143547	0.174397		262.583	334.167	286.26	235.121	190.311	271.68	285.404	275.86	226.508	219.837	211.237	296.164	312.155	329.684	299.053	231.398	265.376
Ccdc115	16.4526	-0.114671	0.320654	14.1848	0.0144775	0.175434		21.0467	12.03	14.7022	17.6341	10.8749	25.5931	25.1007	12.7498	13.8244	14.3893	14.3641	27.0606	24.495	9.66501	9.59062	11.4428	15.1311
Rac3	2.80358	1.31238	0.902497	14.1877	0.01446	0.175434		6.01335	0	0	1.95934	1.08749	4.92174	8.3669	1.15907	0	0.799406	0	6.01348	5.6527	3.22167	3.4875	3.81426	1.16393
Nlrc5	5.46487	-1.22823	0.622637	14.1525	0.0146691	0.177527		2.00445	1.33667	12.9725	17.6341	5.43746	1.9687	1.85931	8.11352	13.8244	8.79347	3.37979	2.25505	2.51231	1.07389	3.4875	5.08568	1.16393
Slfn9	7.15751	-0.628141	0.473994	14.1471	0.0147013	0.177687		3.00667	8.02001	12.1077	17.6341	6.52495	2.95304	4.64828	9.27259	9.57077	10.3923	3.37979	4.51011	1.88423	6.44334	5.23125	11.4428	4.65571
Relb	11.6119	0.657447	0.424138	14.1364	0.0147656	0.178234		4.0089	1.33667	12.1077	11.7561	10.8749	6.89044	28.8193	6.95444	19.1415	13.5899	13.5192	7.51684	12.5616	5.36945	17.4375	12.7142	12.8032
Mxd1	5.73932	0.140833	0.624964	14.1319	0.0147927	0.178331		1.00222	0	11.2428	10.7764	4.34997	4.92174	5.57794	4.6363	13.8244	6.39525	2.53485	0.751684	1.25616	7.51723	7.84687	11.4428	3.49178
Paip2	27.1011	0.561226	0.263695	14.1076	0.0149403	0.179879		18.04	12.03	33.7285	20.5731	20.6623	20.6713	25.1007	25.4996	35.0928	27.1798	40.5575	26.309	19.4704	24.6995	46.2094	24.157	40.7375
2410002F23Rik	4.26359	-1.03519	0.670856	14.0962	0.0150097	0.180483		6.01335	5.34667	0	5.87803	8.69993	10.8278	6.50759	2.31815	1.06342	3.99703	4.22474	3.75842	4.39655	0	0.871875	5.08568	3.49178
Rpl8	214.711	0.0108148	0.130696	14.0867	0.0150679	0.18095		229.509	270.007	199.777	169.483	183.786	229.353	234.273	222.542	182.908	183.863	231.516	277.372	253.744	228.739	200.531	165.285	187.392
Timm8a1	6.1624	-0.256022	0.574141	14.0835	0.0150873	0.180951		12.0267	16.04	3.45934	1.95934	3.26248	8.85913	7.43725	4.6363	1.06342	3.99703	5.91464	4.51011	13.1896	10.7389	5.23125	1.27142	1.16393
Nap1l1	37.3712	-0.357072	0.243177	14.0728	0.0151536	0.181514		51.1134	78.8634	44.1066	21.5528	25.0123	45.28	32.538	39.4085	30.8392	34.3745	27.0384	36.0809	32.032	48.3251	34.0031	27.9712	26.7704
Gask1b	14.6193	0.0473399	0.354874	14.0542	0.0152688	0.18266		25.0556	21.3867	9.51318	9.79672	6.52495	17.7183	15.8041	17.3861	9.57077	6.39525	15.2091	18.0404	21.3547	17.1822	7.84687	7.62852	22.1146
Adgre5	28.0037	-0.756706	0.256045	14.0428	0.0153397	0.183274		26.0578	29.4067	49.2956	39.1869	59.812	19.687	15.8041	11.5907	25.5221	32.7757	23.6586	25.5573	16.33	17.1822	34.0031	29.2427	20.9507
B4galt7	12.5203	0.616232	0.40064	14.0245	0.0154547	0.184413		18.04	9.35668	3.45934	6.8577	4.34997	19.687	20.4524	24.3406	7.44393	11.9911	7.60454	18.0404	11.9335	16.1084	8.71875	13.9856	10.4754
Cdk18	55.7303	-0.14915	0.205471	14.0012	0.0156019	0.185932		86.1913	42.7734	41.5121	47.0243	76.1244	57.0922	57.6387	44.0448	51.0441	55.159	76.8903	41.3426	48.9901	38.66	43.5937	64.8424	74.4914
Grina	101.865	0.136739	0.165866	13.9919	0.0156608	0.18594		83.1846	69.5067	92.5373	109.723	108.749	89.5757	92.9656	137.93	116.976	141.495	99.7039	65.3966	78.5098	98.7979	103.753	133.499	109.409
Pdia4	17.2434	0.227668	0.34128	13.994	0.0156477	0.18594		7.01557	34.7534	17.2967	18.6138	8.69993	10.8278	15.8041	18.5452	27.6489	8.79347	14.3641	14.282	11.9335	28.995	25.2844	13.9856	16.295
Sh2b2	5.08776	-0.581719	0.65437	13.9886	0.0156819	0.18594		16.0356	6.68334	1.72967	2.93902	3.26248	10.8278	4.64828	0	3.19026	4.79644	0.844949	11.2753	7.53694	0	4.35937	2.54284	5.81964
Taf9	4.07756	0.249809	0.760963	13.9917	0.0156624	0.18594		7.01557	0	1.72967	0.979672	2.17498	9.84348	8.3669	3.47722	4.25368	5.59585	6.75959	6.01348	8.16502	0	2.61562	0	2.32786
Slbp	10.9977	-0.329794	0.399464	13.9609	0.0158599	0.187812		17.0378	16.04	8.64834	7.83738	10.8749	13.7809	7.43725	17.3861	3.19026	3.19763	14.3641	18.0404	8.79309	17.1822	6.10312	8.89994	8.1475
Bmp2k	10.227	-0.30334	0.40357	13.9543	0.0159023	0.188077		17.0378	9.35668	11.2428	3.91869	8.69993	20.6713	16.7338	9.27259	6.38051	6.39525	9.29444	12.7786	14.4458	6.44334	7.84687	6.3571	6.98357
Acta2	9.27055	-1.45958	0.726667	13.9158	0.0161534	0.190672		50.1112	32.08	0.864834	0	2.17498	9.84348	9.29656	8.11352	2.12684	6.39525	11.8293	6.01348	3.76847	2.14778	0.871875	3.81426	8.1475
Herc3	3.89903	-0.887397	0.74949	13.9109	0.0161853	0.190672		9.02002	8.02001	3.45934	0.979672	1.08749	4.92174	8.3669	1.15907	7.44393	2.39822	2.53485	5.26179	7.53694	3.22167	0.871875	0	0
Memo1	14.3976	-0.566189	0.327498	13.909	0.0161976	0.190672		32.0712	22.7234	10.378	14.6951	17.3999	15.7496	13.9448	10.4317	3.19026	9.59288	10.1394	18.7921	15.702	18.2561	8.71875	10.1714	12.8032
Rab32	30.2279	0.58636	0.290539	13.9082	0.0162031	0.190672		21.0467	13.3667	20.756	22.5325	13.0499	68.9044	50.2014	31.295	29.7757	21.584	30.4182	42.846	40.197	45.1034	22.6687	20.3427	19.7868
Arpc3	200.791	-0.254699	0.140163	13.888	0.0163364	0.191624		207.46	169.757	255.991	235.121	216.411	268.727	206.384	169.225	194.606	161.48	154.626	254.821	206.638	206.187	185.709	167.827	152.475
Csk	34.9957	-0.426815	0.272474	13.8867	0.0163454	0.191624		24.0534	41.4367	35.4582	60.7397	42.4122	38.3896	30.6786	24.3406	40.4099	39.1709	34.6429	14.282	14.4458	22.5517	40.1062	53.3996	38.4096
Epb41l1	26.621	0.206455	0.286172	13.8874	0.0163407	0.191624		25.0556	13.3667	18.1615	40.1666	27.1873	20.6713	15.8041	23.1815	42.5368	30.3774	27.8833	19.5438	16.33	20.4039	35.7469	47.0425	29.0982
Rps27rt	238.827	0.276042	0.136474	13.8805	0.0163864	0.191864		185.412	165.747	187.669	248.837	283.835	219.51	222.188	212.111	274.362	298.978	247.57	214.982	195.332	248.069	286.847	310.226	258.392
H4c9	8.25929	0.82983	0.492238	13.8591	0.0165297	0.193081		7.01557	2.67334	4.32417	4.89836	7.61244	3.93739	12.0855	1.15907	14.8879	14.3893	14.3641	5.26179	4.39655	4.29556	8.71875	15.257	15.1311
Plxnb2	54.6914	-0.227495	0.198965	13.8588	0.0165316	0.193081		53.1179	37.4267	64.8626	70.5364	84.8244	43.3113	32.538	54.4765	64.8686	59.9555	59.9914	38.3359	43.9655	40.8078	67.1343	49.5854	64.0161
Aldoc	5.69845	0.467175	0.580988	13.8394	0.0166621	0.194364		3.00667	2.67334	9.51318	2.93902	2.17498	10.8278	3.71862	11.5907	8.50735	2.39822	0.844949	9.7719	8.16502	7.51723	6.975	5.08568	1.16393
Gpr137b	110.443	0.0148592	0.182038	13.7765	0.017093	0.199142		176.392	152.38	80.4296	69.5567	79.3869	98.4348	127.363	119.385	105.278	109.519	114.068	113.504	125.616	122.423	90.675	95.3565	97.77
Cd48	51.0895	-0.149541	0.203168	13.767	0.0171591	0.199657		47.1045	38.7634	54.4846	71.5161	64.162	42.327	39.9752	60.2718	42.5368	57.5573	59.1464	30.8191	37.6847	40.8078	44.4656	63.571	73.3275
Rapsn	4.33885	-1.32966	0.711525	13.764	0.0171798	0.199657		2.00445	1.33667	6.91868	10.7764	8.69993	10.8278	2.78897	1.15907	2.12684	1.59881	2.53485	9.7719	8.16502	0	2.61562	1.27142	1.16393
Gsdmd	17.533	-0.543286	0.305238	13.7607	0.0172028	0.199676		13.0289	10.6933	25.945	31.3495	27.1873	13.7809	13.0152	12.7498	24.4586	20.7846	18.5889	14.282	10.6773	7.51723	14.8219	22.8856	16.295
Sgk1	17.3461	-0.449442	0.408537	13.7544	0.0172468	0.199934		49.109	25.3967	9.51318	12.7357	7.61244	35.4365	19.5228	20.8633	17.0147	7.19466	5.91464	9.7719	17.5862	16.1084	15.6937	11.4428	13.9671
Slc7a2	1.54905	-0.523654	1.11069	13.7515	0.0172677	0.199934		7.01557	4.01	0	0	0	1.9687	1.85931	2.31815	2.12684	0	0	1.50337	2.51231	2.14778	0.871875	0	0
Trim12a	4.18982	-0.184581	0.696877	13.7318	0.0174055	0.201281		0	0	6.91868	11.7561	8.69993	2.95304	0.929656	5.79537	2.12684	3.19763	4.22474	0.751684	0.628078	3.22167	7.84687	6.3571	5.81964
Npm1	83.1536	0.119969	0.165072	13.7256	0.0174498	0.201545		94.2091	117.627	70.9164	62.699	63.0745	78.7479	82.7394	89.2487	71.2491	73.5454	80.2701	89.4505	92.3275	125.645	79.3406	75.0138	67.5078
BC147527	1.8682	-0.332998	1.0586	13.6793	0.0177804	0.20511		0	0	4.32417	4.89836	5.43746	0	0	0	5.3171	0.799406	0	0.751684	0	1.07389	1.74375	5.08568	2.32786
Cry1	2.02692	1.31211	1.0908	13.6684	0.0178585	0.205758		3.00667	0	0.864834	0	0	2.95304	6.50759	1.15907	0	0	3.37979	7.51684	4.39655	1.07389	0	1.27142	2.32786
Lat2	71.6241	-0.111195	0.191545	13.5763	0.0185371	0.213313		116.258	106.933	71.7813	52.9023	52.1996	64.967	61.3573	77.658	46.7904	55.159	59.9914	90.9538	74.7413	94.5023	54.9281	72.4709	64.0161
Prkcd	44.2624	-0.0393732	0.21556	13.5637	0.0186318	0.21414		30.0667	26.7334	46.7011	63.6787	61.987	38.3896	37.1862	37.0904	55.2978	62.3537	42.2474	31.5707	38.9408	36.5123	41.85	48.3139	53.5407
Rplp0	351.793	0.114464	0.119032	13.5559	0.0186906	0.214552		289.643	449.12	405.607	284.105	291.448	362.24	355.129	355.836	321.153	290.984	323.615	400.648	368.682	447.812	398.447	308.955	327.064
Fmnl2	2.29521	0.440309	0.900256	13.5451	0.0187728	0.214738		6.01335	2.67334	1.72967	0	0	2.95304	6.50759	1.15907	1.06342	0	0.844949	3.75842	3.76847	2.14778	1.74375	0	4.65571
Mlec	18.5452	-0.53218	0.314561	13.5429	0.0187894	0.214738		16.0356	32.08	31.9989	17.6341	9.78743	21.6557	26.96	20.8633	24.4586	11.9911	11.8293	17.2887	20.7266	17.1822	16.5656	8.89994	9.31143
Rars	20.6018	0.072355	0.312072	13.5422	0.0187945	0.214738		36.0801	30.7434	12.9725	13.7154	8.69993	23.6244	30.6786	12.7498	17.0147	20.7846	16.899	24.0539	30.7758	24.6995	16.5656	12.7142	17.4589
Rps3a1	247.152	0.148001	0.125632	13.5417	0.0187984	0.214738		279.621	261.987	255.126	187.117	204.448	238.212	243.57	286.291	207.367	223.034	223.911	273.613	294.569	324.315	276.384	186.899	235.114
Sash3	20.8255	-0.173929	0.288713	13.5314	0.0188763	0.215365		21.0467	13.3667	23.3505	30.3698	25.0123	17.7183	12.0855	13.9089	26.5855	35.9733	16.899	18.0404	16.33	10.7389	28.7719	22.8856	20.9507
Myo1g	27.2339	0.17874	0.259509	13.5174	0.0189834	0.216323		19.0423	20.05	29.4044	32.3292	31.5373	18.7026	15.8041	15.068	46.7904	30.3774	32.108	28.564	23.867	22.5517	37.4906	26.6998	32.59
Slc46a3	8.05929	0.0118333	0.453798	13.5042	0.0190852	0.217219		4.0089	2.67334	17.2967	13.7154	5.43746	5.90609	8.3669	4.6363	8.50735	11.9911	5.91464	6.76516	6.28078	2.14778	11.3344	12.7142	9.31143
Gm26982	2.35801	-0.636616	0.973602	13.4939	0.0191649	0.217861		6.01335	4.01	0	0.979672	0	7.87479	6.50759	2.31815	1.06342	0.799406	1.6899	2.25505	1.88423	2.14778	0	2.54284	0
Rps12	211.795	0.341338	0.1309	13.4847	0.0192359	0.218404		195.434	208.52	200.642	152.829	163.124	203.76	236.133	213.27	232.889	185.462	191.803	251.063	226.736	314.65	262.434	162.742	199.032
Zfp12	3.04574	0.119876	0.725333	13.4681	0.0193654	0.219608		2.00445	2.67334	1.72967	9.79672	2.17498	0	0	2.31815	3.19026	3.19763	4.22474	0.751684	0.628078	4.29556	2.61562	6.3571	5.81964
1700017B05Rik	13.6032	-0.0804449	0.371414	13.4594	0.0194338	0.220116		16.0356	21.3867	5.18901	10.7764	17.3999	15.7496	12.0855	15.068	6.38051	12.7905	11.8293	24.0539	25.1231	15.0345	7.84687	6.3571	8.1475
Gm4316	10.9173	-0.211784	0.449603	13.4495	0.0195116	0.220731		6.01335	8.02001	24.2154	11.7561	3.26248	14.7652	13.0152	12.7498	10.6342	8.79347	7.60454	24.0539	11.9335	9.66501	13.0781	2.54284	3.49178
Slc6a8	92.9183	0.198654	0.230432	13.4343	0.0196319	0.221824		185.412	116.29	49.2956	51.9226	65.2495	80.7166	81.8097	103.158	72.3125	79.1412	96.3241	110.498	119.963	98.7979	74.1093	99.1707	95.4421
Irf5	50.9799	-0.213998	0.22334	13.428	0.0196813	0.222114		49.109	54.8034	31.134	76.4144	69.5995	36.4209	39.0455	54.4765	66.9954	67.9495	48.1621	30.8191	40.197	51.5467	31.3875	67.3852	51.2128
Idnk	14.7793	0.0872621	0.336996	13.4071	0.0198487	0.223733		7.01557	9.35668	16.4319	14.6951	23.9248	10.8278	9.29656	16.227	21.2684	17.5869	21.1237	7.51684	10.6773	12.8867	11.3344	17.7999	23.2786
Tlr4	14.3426	0.196363	0.415194	13.4036	0.0198763	0.223776		3.00667	2.67334	25.0802	19.5934	18.4874	15.7496	14.8745	9.27259	11.6976	11.9911	20.2788	11.2753	8.79309	7.51723	11.3344	25.4284	26.7704
Maff	2.28685	-1.33297	0.909295	13.3921	0.0199685	0.22426		6.01335	8.02001	0.864834	0.979672	1.08749	2.95304	6.50759	1.15907	1.06342	0.799406	0.844949	1.50337	3.76847	2.14778	0	0	1.16393
Ncf4	94.4825	0.896582	0.170556	13.3896	0.0199892	0.22426		56.1246	41.4367	46.7011	67.5974	69.5995	98.4348	108.77	120.544	110.596	134.3	134.347	92.4572	86.0467	71.9506	96.7781	129.685	140.835
Stx16	14.5872	-0.266331	0.351457	13.3893	0.0199911	0.22426		7.01557	9.35668	25.0802	26.4511	18.4874	6.89044	12.0855	10.4317	22.3318	20.7846	12.6742	8.26853	10.0492	13.9606	9.59062	22.8856	11.6393
Hip1	13.9132	-0.41574	0.3706	13.3862	0.0200165	0.224276		22.0489	33.4167	15.567	11.7561	5.43746	15.7496	12.0855	19.7043	4.25368	15.1887	4.22474	15.7854	13.8177	15.0345	13.0781	8.89994	10.4754
Smad7	2.72853	-0.0466236	0.823393	13.3784	0.0200794	0.224712		3.00667	8.02001	0.864834	0	2.17498	5.90609	2.78897	1.15907	0	1.59881	0.844949	6.76516	5.6527	4.29556	0.871875	1.27142	1.16393
Ap3m1	15.2346	-0.850646	0.341883	13.3724	0.0201276	0.224983		19.0423	36.09	16.4319	10.7764	14.1374	23.6244	20.4524	22.0224	6.38051	8.79347	13.5192	15.0337	10.0492	13.9606	10.4625	8.89994	9.31143
Gpcpd1	13.4841	0.0443247	0.368826	13.3662	0.0201782	0.225279		7.01557	8.02001	12.1077	22.5325	15.2249	8.85913	9.29656	9.27259	26.5855	19.9852	17.7439	6.76516	6.28078	16.1084	15.6937	11.4428	16.295
Litaf	108.282	-0.492616	0.153656	13.3607	0.0202229	0.225509		136.303	97.5768	171.237	182.219	134.849	75.7948	73.4428	75.3398	88.2638	96.7282	112.378	84.1887	94.8398	80.5418	113.344	127.142	96.606
Rspry1	5.87038	0.491877	0.546896	13.3499	0.0203114	0.226227		2.00445	5.34667	8.64834	3.91869	3.26248	0.984348	4.64828	9.27259	17.0147	7.99406	5.06969	2.25505	4.39655	6.44334	7.84687	2.54284	8.1475
Snord3b2	7.31809	2.62277	0.714082	13.3447	0.0203544	0.226437		0	4.01	2.5945	0.979672	0	10.8278	8.3669	27.8178	12.761	2.39822	5.06969	9.02021	12.5616	8.59112	8.71875	2.54284	8.1475
Nsd3	14.0453	-0.113434	0.356851	13.3087	0.0206511	0.229464		5.01112	13.3667	19.0264	12.7357	20.6623	6.89044	13.9448	16.227	24.4586	19.1858	16.899	8.26853	7.53694	6.44334	20.0531	15.257	12.8032
Pnrc1	33.7004	0.378249	0.316581	13.3029	0.0206998	0.229733		11.0245	14.7033	31.9989	52.9023	34.7997	25.5931	55.7794	25.4996	47.8539	31.1769	37.1777	15.0337	28.8916	26.8473	33.1312	59.7567	40.7375
Eif6	35.5312	-0.0452866	0.232753	13.2862	0.0208397	0.23074		48.1068	38.7634	25.0802	29.3902	34.7997	39.3739	57.6387	32.4541	23.3952	34.3745	37.1777	27.8123	43.9655	27.9211	27.0281	26.6998	50.0489
Sc5d	11.4074	-0.662125	0.405798	13.2872	0.0208307	0.23074		20.0445	10.6933	10.378	12.7357	7.61244	29.5304	13.0152	6.95444	11.6976	8.79347	6.75959	12.7786	12.5616	3.22167	5.23125	11.4428	10.4754
AU020206	14.5032	-0.684813	0.400059	13.2786	0.0209035	0.231173		43.0957	26.7334	12.1077	7.83738	13.0499	13.7809	10.2262	11.5907	5.3171	14.3893	9.29444	21.0472	25.1231	9.66501	11.3344	3.81426	8.1475
Bmp2	2.84081	-0.389461	0.869827	13.2715	0.0209634	0.231289		0	0	2.5945	5.87803	8.69993	0.984348	1.85931	3.47722	4.25368	1.59881	5.91464	0	1.25616	0	0.871875	5.08568	5.81964
Tmem189	75.5463	0.189675	0.177191	13.2718	0.0209609	0.231289		88.1958	46.7834	57.0791	66.6177	95.6993	60.0452	101.332	62.59	70.1857	82.3389	81.1151	80.4302	84.1625	70.8767	59.2875	76.2852	101.262
Baz2a	10.4211	0.332094	0.405621	13.252	0.0211285	0.232653		6.01335	5.34667	12.1077	7.83738	11.9624	6.89044	6.50759	11.5907	19.1415	15.1887	13.5192	3.75842	6.28078	9.66501	16.5656	17.7999	6.98357
Ino80b	6.7207	0.548525	0.49512	13.251	0.0211368	0.232653		1.00222	5.34667	9.51318	5.87803	5.43746	3.93739	3.71862	6.95444	12.761	11.1917	6.75959	3.00674	4.39655	4.29556	10.4625	11.4428	8.1475
Psenen	43.7406	-0.20569	0.214517	13.2288	0.0213261	0.234462		41.0912	46.7834	51.0252	41.1462	64.162	34.4522	29.749	31.295	39.3465	45.5662	66.7509	38.3359	35.1724	42.9556	27.0281	47.0425	61.6882
Il4ra	23.5398	-0.601536	0.294357	13.1761	0.0217836	0.239211		29.0645	21.3867	25.0802	35.2682	28.2748	36.4209	29.749	10.4317	8.50735	29.578	21.9687	30.8191	14.4458	12.8867	19.1812	20.3427	26.7704
Hgsnat	15.3372	1.6011	0.393012	13.1697	0.0218395	0.239544		9.02002	2.67334	9.51318	4.89836	3.26248	22.64	26.96	26.6587	15.9513	17.5869	8.44949	20.2955	24.495	20.4039	24.4125	16.5285	6.98357
Stk17b	21.161	0.491887	0.300103	13.1449	0.0220583	0.241661		17.0378	8.02001	9.51318	17.6341	21.7498	20.6713	30.6786	23.1815	24.4586	27.9792	38.0227	13.5303	16.9581	18.2561	13.0781	22.8856	36.0818
Rpl29	230.568	0.0753658	0.117628	13.1393	0.0221076	0.241918		203.452	270.007	238.694	208.67	205.536	242.15	219.399	283.973	190.352	199.052	199.408	278.123	232.389	280.285	250.228	221.227	196.704
Prkar2b	5.68722	-0.801143	0.606015	13.1216	0.0222654	0.243361		12.0267	21.3867	5.18901	3.91869	1.08749	3.93739	2.78897	12.7498	1.06342	2.39822	4.22474	5.26179	10.0492	3.22167	2.61562	1.27142	3.49178
A630001G21Rik	9.68222	-0.00588104	0.438896	13.114	0.022334	0.243826		3.00667	6.68334	10.378	16.6544	15.2249	5.90609	7.43725	13.9089	7.44393	7.99406	10.1394	3.75842	3.76847	7.51723	6.975	20.3427	17.4589
Pttg1	10.7942	0.611583	0.413491	13.103	0.0224323	0.244614		3.00667	2.67334	10.378	16.6544	11.9624	5.90609	10.2262	6.95444	17.0147	12.7905	10.9843	12.7786	11.3054	3.22167	14.8219	16.5285	16.295
Arl5c	3.63623	-1.54691	0.677618	13.0993	0.0224655	0.244691		6.01335	4.01	3.45934	13.7154	10.8749	0	2.78897	0	2.12684	2.39822	3.37979	0	3.14039	1.07389	1.74375	1.27142	5.81964
Arhgap9	21.1319	0.0756423	0.283289	13.0866	0.0225802	0.245579		13.0289	12.03	24.2154	29.3902	29.3623	17.7183	13.0152	16.227	15.9513	30.3774	25.3485	22.5505	15.702	16.1084	25.2844	20.3427	32.59
Sft2d2	17.0235	0.358315	0.326456	13.0845	0.0225994	0.245579		5.01112	13.3667	25.0802	22.5325	18.4874	11.8122	8.3669	10.4317	24.4586	11.1917	16.054	19.5438	17.5862	9.66501	26.1562	22.8856	26.7704
Elmo1	10.9828	-0.175912	0.422689	13.0682	0.0227479	0.246906		13.0289	17.3767	7.78351	2.93902	9.78743	13.7809	22.3117	11.5907	6.38051	12.7905	13.5192	10.5236	16.9581	12.8867	4.35937	2.54284	8.1475
Ifi214	2.16801	-1.82936	1.03665	13.061	0.0228139	0.247336		0	0	3.45934	13.7154	5.43746	0	0	1.15907	2.12684	3.19763	4.22474	0	0.628078	0	1.74375	0	1.16393
A530040E14Rik	1.86548	-1.03576	1.07016	13.0301	0.0230979	0.249548		0	0	6.91868	2.93902	4.34997	0	0	3.47722	2.12684	3.19763	1.6899	0	0	0	0.871875	3.81426	2.32786
Gspt1	16.0642	-0.000559945	0.338132	13.0341	0.0230617	0.249548		23.0512	20.05	11.2428	13.7154	7.61244	22.64	27.8897	13.9089	11.6976	9.59288	13.5192	20.2955	21.9827	17.1822	6.10312	13.9856	18.6229
Pole4	14.2969	-0.585543	0.350221	13.0303	0.0230969	0.249548		21.0467	32.08	10.378	10.7764	16.3124	14.7652	17.6635	16.227	8.50735	13.5899	5.91464	19.5438	16.33	16.1084	10.4625	6.3571	6.98357
Hmga1b	45.9174	-0.736072	0.211421	13.022	0.0231733	0.249787		74.1646	108.27	42.3769	60.7397	48.9371	40.3583	39.9752	41.7267	31.9026	29.578	29.5732	30.0674	42.0812	54.7684	40.1062	36.8712	29.0982
Rrs1	9.01059	-0.495942	0.448338	13.0242	0.0231527	0.249787		17.0378	16.04	4.32417	7.83738	3.26248	12.7965	16.7338	15.068	6.38051	5.59585	7.60454	6.76516	10.6773	6.44334	3.4875	3.81426	9.31143
Stoml1	8.53239	0.0445191	0.451168	13.0007	0.0233723	0.251642		3.00667	8.02001	12.1077	8.81705	8.69993	7.87479	3.71862	4.6363	14.8879	15.9881	6.75959	10.5236	3.76847	4.29556	13.95	6.3571	11.6393
Sec61g	56.7698	0.15851	0.190379	12.9947	0.0234284	0.251956		45.1001	69.5067	54.4846	57.8006	54.3746	40.3583	49.2718	92.7259	52.1075	40.7697	44.7823	51.8662	53.3866	77.3201	65.3906	62.2996	53.5407
Usp14	22.8704	-0.0656057	0.276957	12.9734	0.0236296	0.253828		29.0645	29.4067	22.4857	16.6544	20.6623	29.5304	27.8897	28.9768	14.8879	11.9911	10.9843	26.309	24.495	36.5123	17.4375	22.8856	18.6229
Hpgds	42.8279	0.077896	0.215668	12.9474	0.0238766	0.256188		37.0823	21.3867	54.4846	58.7803	58.7246	31.4991	26.0304	34.7722	37.2197	51.9614	41.4025	31.5707	42.0812	42.9556	49.6969	57.2139	51.2128
Camk2d	25.9597	0.0945843	0.280243	12.9436	0.0239129	0.256284		35.0779	32.08	13.8374	18.6138	18.4874	42.327	26.96	23.1815	24.4586	19.1858	27.0384	30.0674	42.7093	24.6995	15.6937	17.7999	29.0982
Cnbp	79.382	-0.193351	0.219742	12.9391	0.0239564	0.256457		122.271	120.3	63.9977	36.2479	83.7369	101.388	95.7546	60.2718	59.5515	67.9495	90.4095	78.9269	75.9974	71.9506	55.8	64.8424	100.098
Trib1	3.70765	-0.957245	0.733361	12.9338	0.0240073	0.256708		10.0222	1.33667	2.5945	1.95934	4.34997	8.85913	5.57794	1.15907	1.06342	5.59585	3.37979	6.01348	1.88423	0	0.871875	2.54284	5.81964
Tollip	20.3465	0.233608	0.309091	12.9305	0.0240385	0.256749		28.0623	20.05	12.9725	9.79672	17.3999	29.5304	28.8193	12.7498	15.9513	17.5869	20.2788	30.0674	33.2881	11.8128	27.0281	16.5285	13.9671
Dnaaf3	1.72365	-1.64904	1.18205	12.9192	0.024148	0.257625		0	0	3.45934	4.89836	2.17498	0	0	1.15907	6.38051	7.19466	1.6899	0	0	1.07389	0	1.27142	0
Ncor2	12.8231	-0.357858	0.368692	12.9009	0.0243254	0.259222		21.0467	9.35668	19.0264	8.81705	6.52495	22.64	16.7338	12.7498	11.6976	15.9881	7.60454	15.0337	16.33	7.51723	12.2062	8.89994	5.81964
Cbfb	23.8418	-0.409744	0.276608	12.8974	0.0243599	0.259294		38.0845	32.08	14.7022	29.3902	20.6623	28.5461	39.9752	23.1815	17.0147	16.7875	18.5889	25.5573	25.1231	20.4039	13.0781	16.5285	25.6064
Gbe1	6.29882	0.413672	0.549548	12.8839	0.0244911	0.260395		8.0178	9.35668	3.45934	1.95934	7.61244	3.93739	1.85931	13.9089	8.50735	0	2.53485	5.26179	9.42117	12.8867	5.23125	3.81426	9.31143
Slc25a24	13.4618	-0.0861105	0.348512	12.8738	0.0245904	0.260639		17.0378	18.7134	9.51318	10.7764	11.9624	17.7183	21.3821	15.068	11.6976	4.79644	7.60454	16.5371	18.8423	17.1822	13.0781	7.62852	9.31143
Tyk2	9.90696	-0.0890357	0.401528	12.8731	0.0245975	0.260639		5.01112	8.02001	15.567	13.7154	11.9624	7.87479	2.78897	8.11352	19.1415	8.79347	6.75959	10.5236	5.6527	10.7389	13.95	13.9856	5.81964
Vwf	8.36581	0.0174762	0.518378	12.8731	0.0245974	0.260639		8.0178	10.6933	16.4319	4.89836	0	8.85913	11.1559	10.4317	7.44393	5.59585	5.91464	12.7786	8.16502	19.33	7.84687	0	4.65571
Spcs3	18.3211	-0.370698	0.298818	12.8521	0.0248051	0.262541		20.0445	38.7634	19.8912	16.6544	11.9624	17.7183	19.5228	28.9768	17.0147	9.59288	14.3641	16.5371	19.4704	21.4778	13.95	12.7142	12.8032
Etnk1	17.5663	-0.099344	0.31174	12.848	0.0248459	0.262677		10.0222	17.3767	26.8099	20.5731	20.6623	13.7809	14.8745	17.3861	21.2684	17.5869	18.5889	4.51011	11.9335	17.1822	26.1562	17.7999	22.1146
Nav2	8.19263	-0.507157	0.49691	12.8305	0.0250197	0.264216		20.0445	8.02001	6.05384	1.95934	13.0499	10.8278	13.0152	5.79537	4.25368	5.59585	4.22474	11.2753	9.42117	16.1084	3.4875	3.81426	2.32786
Gstm5	4.71642	1.60201	0.695373	12.8246	0.0250788	0.264542		2.00445	2.67334	3.45934	0.979672	1.08749	10.8278	3.71862	2.31815	4.25368	1.59881	1.6899	9.02021	8.16502	11.8128	13.0781	0	3.49178
Wsb2	39.9073	-0.261303	0.231044	12.8139	0.025187	0.265385		80.178	46.7834	27.6747	43.1056	41.3247	36.4209	39.0455	45.2039	29.7757	24.7816	21.1237	50.3629	49.6182	39.7339	35.7469	27.9712	39.5736
Dmwd	4.45723	3.53457	1.05286	12.7956	0.0253709	0.266722		0	1.33667	0	0	0	16.7339	13.0152	3.47722	3.19026	1.59881	6.75959	9.02021	6.90886	7.51723	2.61562	1.27142	2.32786
Fabp7	1.87307	-1.08641	1.19173	12.7963	0.0253645	0.266722		10.0222	9.35668	0	0	0	2.95304	0.929656	0	0	0	0	3.00674	1.88423	1.07389	2.61562	0	0
Timm10b	32.6146	-0.121627	0.24384	12.7899	0.0254288	0.267031		22.0489	18.7134	41.5121	43.1056	48.9371	27.5618	30.6786	28.9768	39.3465	34.3745	33.7979	22.5505	17.5862	28.995	37.4906	36.8712	41.9014
Serpinb6b	26.8491	0.933187	0.297855	12.7733	0.025598	0.268506		16.0356	22.7234	8.64834	19.5934	15.2249	25.5931	26.96	47.522	30.8392	25.581	22.8136	38.3359	37.0566	56.9162	15.6937	17.7999	29.0982
Cstb	478.678	-0.028641	0.11238	12.7635	0.0256986	0.269261		563.25	569.421	410.796	412.442	536.133	406.536	412.767	566.787	468.968	400.503	485.845	502.125	486.132	577.753	456.862	400.497	480.702
Set	46.0318	-0.0178268	0.23572	12.7415	0.0259257	0.271336		54.1201	85.5467	31.9989	25.4715	32.6248	56.1078	55.7794	44.0448	35.0928	41.5691	54.0767	46.6044	55.2709	50.4728	31.3875	38.1426	44.2293
Kif11	1.49699	1.18671	1.17789	12.7156	0.026195	0.273544		2.00445	2.67334	0	0	0	0.984348	3.71862	0	1.06342	0	0	3.75842	6.28078	3.22167	1.74375	0	0
Por	109.005	-0.236184	0.177421	12.7166	0.026184	0.273544		201.447	139.013	89.0779	93.0688	120.712	115.169	103.192	78.817	64.8686	88.7341	101.394	113.504	129.384	83.7634	98.5218	119.513	112.901
Pnpt1	6.8436	-0.364	0.478963	12.6972	0.0263879	0.275251		2.00445	8.02001	8.64834	12.7357	11.9624	3.93739	2.78897	9.27259	4.25368	4.79644	8.44949	4.51011	1.88423	11.8128	6.975	3.81426	10.4754
Flna	65.909	-1.02586	0.200517	12.6928	0.026434	0.275426		152.338	120.3	82.1593	74.4551	69.5995	59.0609	48.3421	62.59	52.1075	43.9674	55.7666	63.1415	61.5517	55.8423	52.3125	34.3283	32.59
Ddx21	12.408	-0.846211	0.39381	12.6636	0.0267433	0.278315		23.0512	21.3867	8.64834	8.81705	11.9624	10.8278	29.749	16.227	9.57077	9.59288	11.8293	11.2753	7.53694	11.8128	4.35937	3.81426	10.4754
Gm15500	48.0559	1.51975	0.228329	12.6611	0.0267708	0.278315		25.0556	30.7434	21.6209	16.6544	10.8749	68.9044	50.2014	70.7035	46.7904	42.3685	53.2318	86.4437	67.8324	69.8029	58.4156	49.5854	47.7211
B4galt6	38.1155	-0.125936	0.219834	12.6527	0.0268602	0.278935		43.0957	72.1801	40.6472	37.2275	32.6248	21.6557	23.2414	50.9993	29.7757	32.7757	27.8833	41.3426	41.4532	50.4728	36.6187	36.8712	29.0982
Rnpep	47.6048	-0.164218	0.236614	12.6433	0.0269608	0.27967		34.0756	41.4367	48.4307	60.7397	61.987	42.327	36.2566	56.7946	71.2491	46.3656	48.1621	33.8258	27.6354	23.6256	47.0812	69.9281	59.3603
Itpkb	13.8877	-0.33643	0.364303	12.6304	0.0271001	0.280804		15.0334	4.01	17.2967	22.5325	25.0123	5.90609	19.5228	8.11352	14.8879	13.5899	14.3641	15.0337	16.33	4.29556	8.71875	13.9856	17.4589
Pilrb2	3.33137	1.07481	0.892427	12.6086	0.0273361	0.282936		0	0	0.864834	0.979672	8.69993	3.93739	3.71862	3.47722	6.38051	0.799406	6.75959	2.25505	0	2.14778	3.4875	3.81426	9.31143
Myo1f	101.862	0.12149	0.159156	12.5977	0.0274554	0.283232		81.1802	66.8334	125.401	114.622	109.837	82.6853	71.5835	99.6804	120.166	123.109	109.843	93.9606	89.1871	110.611	113.344	119.513	100.098
Txn1	163.483	-0.166711	0.140092	12.6009	0.0274199	0.283232		188.418	261.987	161.724	171.443	151.161	125.012	150.604	175.02	158.449	109.519	158.85	141.317	153.251	197.596	163.912	139.856	171.097
Vat1	137.119	0.0233483	0.145056	12.5984	0.0274472	0.283232		176.392	161.737	171.237	105.805	134.849	121.075	111.559	106.635	98.898	97.5276	105.619	179.653	178.374	175.044	179.606	110.614	116.393
Rev3l	1.68246	-0.479526	1.01514	12.5817	0.0276309	0.284729		1.00222	0	2.5945	0.979672	7.61244	0.984348	0.929656	0	2.12684	0	4.22474	0	2.51231	0	0.871875	1.27142	3.49178
Vwa5a	52.5744	0.193932	0.187959	12.5752	0.0277024	0.285152		36.0801	60.1501	57.9439	68.577	47.8496	31.4991	35.3269	44.0448	53.171	58.3567	54.0767	45.1011	52.7586	56.9162	61.0312	75.0138	55.8686
Efhd2	210.243	-0.567044	0.132291	12.5661	0.0278025	0.285787		352.783	272.68	205.831	251.776	264.26	234.275	208.243	183.134	156.323	147.091	176.594	198.445	193.448	171.822	159.553	176.727	221.146
Inka1	6.08837	-0.153838	0.528339	12.5641	0.0278251	0.285787		1.00222	6.68334	6.91868	5.87803	11.9624	6.89044	1.85931	6.95444	3.19026	10.3923	7.60454	5.26179	1.25616	7.51723	7.84687	7.62852	4.65571
Psmg2	6.36897	-0.775001	0.511005	12.5479	0.0280046	0.287316		8.0178	9.35668	3.45934	5.87803	14.1374	4.92174	12.0855	4.6363	4.25368	3.19763	10.1394	3.00674	8.16502	2.14778	1.74375	3.81426	9.31143
Picalm	48.698	-0.434707	0.223448	12.5443	0.028045	0.287415		69.1535	42.7734	47.5659	39.1869	72.8619	64.967	50.2014	22.0224	42.5368	63.9525	55.7666	58.6314	40.197	31.1428	39.2344	45.7711	41.9014
Lilrb4a	197.4	0.0443171	0.178576	12.5194	0.0283242	0.289643		236.525	207.184	155.67	150.869	131.586	151.59	276.108	326.859	222.255	215.84	213.772	212.727	192.192	215.852	137.756	116.971	192.048
Selenbp1	6.23325	0.162754	0.53157	12.5205	0.0283118	0.289643		4.0089	1.33667	17.2967	11.7561	1.08749	3.93739	2.78897	2.31815	9.57077	7.19466	5.06969	6.01348	4.39655	4.29556	7.84687	8.89994	8.1475
Csf1r	252.043	-0.36011	0.155891	12.5132	0.0283934	0.290034		237.527	184.46	346.799	379.133	260.998	303.179	277.967	235.292	253.094	242.22	242.5	202.203	183.399	165.379	265.05	293.698	211.835
Sesn1	22.6136	-0.993599	0.297112	12.4993	0.0285512	0.291328		14.0311	22.7234	63.1329	34.2885	45.6747	17.7183	13.9448	16.227	17.0147	17.5869	16.054	21.0472	13.8177	10.7389	28.7719	16.5285	15.1311
Rab8a	31.2581	-0.0395742	0.233363	12.4903	0.0286529	0.292048		22.0489	29.4067	32.8637	38.2072	34.7997	22.64	22.3117	27.8178	38.2831	44.7668	40.5575	27.8123	18.8423	30.0689	27.9	38.1426	34.9178
Eloa	21.0653	0.0141237	0.296379	12.4799	0.0287726	0.292948		11.0245	18.7134	18.1615	34.2885	19.5749	22.64	13.0152	18.5452	29.7757	23.9822	26.1934	17.2887	11.3054	22.5517	14.8219	31.7855	24.4425
Cutc	2.93586	0.114514	0.756798	12.471	0.0288739	0.293661		1.00222	1.33667	2.5945	4.89836	8.69993	0	1.85931	0	3.19026	4.79644	1.6899	0.751684	1.88423	1.07389	8.71875	5.08568	2.32786
Dph5	3.8036	-0.0696955	0.69378	12.4677	0.0289124	0.293733		7.01557	8.02001	1.72967	0.979672	1.08749	3.93739	3.71862	4.6363	6.38051	1.59881	1.6899	8.26853	4.39655	6.44334	3.4875	1.27142	0
Notch2	16.1215	-0.353702	0.325363	12.4537	0.0290725	0.295041		8.0178	10.6933	25.0802	28.4105	22.8373	13.7809	13.9448	9.27259	23.3952	19.9852	12.6742	15.0337	11.3054	7.51723	15.6937	17.7999	18.6229
Snx30	7.36233	-0.603764	0.491238	12.4293	0.0293558	0.297593		13.0289	9.35668	3.45934	8.81705	10.8749	6.89044	13.0152	3.47722	3.19026	8.79347	2.53485	13.5303	11.9335	6.44334	2.61562	2.54284	4.65571
Cd4	2.56844	-0.744058	0.825138	12.4024	0.0296714	0.300467		3.00667	0	4.32417	6.8577	6.52495	0	0.929656	0	2.12684	2.39822	0.844949	3.00674	1.25616	0	3.4875	8.89994	0
Ddx39a	9.58715	-0.912667	0.490629	12.3837	0.0298923	0.302377		23.0512	24.06	5.18901	7.83738	4.34997	15.7496	13.0152	4.6363	6.38051	7.19466	6.75959	12.7786	12.5616	4.29556	6.975	0	8.1475
Traf3	4.84304	-0.36178	0.648599	12.3719	0.0300322	0.303465		6.01335	5.34667	2.5945	3.91869	3.26248	3.93739	14.8745	5.79537	2.12684	4.79644	5.06969	7.51684	11.9335	1.07389	1.74375	0	2.32786
Ap3s1	35.3088	-0.221895	0.225693	12.3625	0.030144	0.303795		66.1468	37.4267	44.1066	31.3495	32.6248	23.6244	39.0455	33.6131	31.9026	21.584	26.1934	33.8258	39.5689	44.0295	45.3375	25.4284	24.4425
Mad2l1	4.75991	-0.572715	0.580452	12.361	0.0301622	0.303795		5.01112	12.03	5.18901	3.91869	3.26248	7.87479	3.71862	3.47722	3.19026	2.39822	0.844949	8.26853	5.6527	10.7389	1.74375	1.27142	2.32786
Mertk	6.52529	-1.91757	0.58717	12.3628	0.0301404	0.303795		10.0222	8.02001	10.378	18.6138	10.8749	6.89044	0	0	7.44393	6.39525	7.60454	6.01348	1.88423	0	9.59062	2.54284	4.65571
Alyref	15.8797	-0.104349	0.353414	12.3513	0.0302783	0.304096		13.0289	30.7434	8.64834	10.7764	11.9624	24.6087	29.749	19.7043	7.44393	9.59288	18.5889	17.2887	17.5862	13.9606	9.59062	12.7142	13.9671
Ezh1	10.953	0.349262	0.404476	12.3486	0.0303106	0.304096		2.00445	8.02001	16.4319	13.7154	9.78743	7.87479	5.57794	11.5907	7.44393	15.9881	17.7439	8.26853	6.90886	9.66501	13.95	11.4428	19.7868
Gars	18.1102	-0.0197395	0.305768	12.3537	0.0302501	0.304096		34.0756	21.3867	13.8374	14.6951	13.0499	15.7496	30.6786	11.5907	13.8244	11.1917	16.054	17.2887	23.867	23.6256	13.0781	15.257	18.6229
Ssr4	58.9067	0.164162	0.180923	12.3477	0.0303219	0.304096		52.1157	73.5167	66.5922	50.9429	45.6747	45.28	50.2014	77.658	66.9954	45.5662	45.6272	66.1482	67.8324	78.394	66.2625	57.2139	45.3932
Lrch4	19.1983	0.472526	0.371947	12.3449	0.030355	0.304102		3.00667	9.35668	27.6747	12.7357	36.9747	10.8278	11.1559	17.3861	22.3318	27.1798	22.8136	18.0404	17.5862	16.1084	15.6937	33.0569	24.4425
R3hdm1	10.9039	0.222021	0.433332	12.3341	0.0304855	0.304782		16.0356	20.05	2.5945	5.87803	4.34997	10.8278	23.2414	9.27259	11.6976	9.59288	10.1394	9.7719	12.5616	17.1822	5.23125	7.62852	9.31143
Rheb	39.5478	-0.0739022	0.221498	12.3339	0.030488	0.304782		46.1023	61.4867	37.1879	34.2885	26.0998	43.3113	42.7642	45.2039	36.1562	27.9792	35.4878	36.0809	33.9162	63.3595	40.1062	26.6998	36.0818
Krtcap2	41.8941	-0.163921	0.23649	12.3255	0.0305893	0.30547		59.1312	60.1501	37.1879	43.1056	21.7498	39.3739	32.538	68.3854	38.2831	36.7727	42.2474	31.5707	35.8005	62.2856	32.2594	31.7855	39.5736
Nod1	3.37878	0.141441	0.743341	12.3136	0.0307339	0.306586		0	1.33667	7.78351	5.87803	2.17498	2.95304	0	2.31815	9.57077	2.39822	5.06969	1.50337	1.25616	4.29556	3.4875	5.08568	2.32786
Cd28	27.9041	-0.348155	0.336736	12.3091	0.0307899	0.306816		16.0356	12.03	64.8626	48.0039	34.7997	30.5148	26.0304	9.27259	20.205	31.9763	32.953	12.7786	25.1231	21.4778	40.9781	22.8856	24.4425
Tmbim4	41.1891	0.122998	0.219516	12.3064	0.0308225	0.306816		31.069	28.07	30.2692	51.9226	46.7621	30.5148	39.0455	52.1583	49.9807	64.7519	47.3171	29.3157	37.6847	26.8473	38.3625	49.5854	46.5571
Itm2c	84.2108	-0.0972791	0.179904	12.2987	0.0309165	0.307426		82.1824	70.8434	104.645	102.866	81.5619	99.4192	52.9904	67.2263	90.3906	100.725	78.5802	59.3831	62.8078	75.1723	106.369	106.799	89.6225
Rps15a	317.398	0.256075	0.126485	12.2827	0.0311125	0.309047		295.656	392.98	262.91	257.654	252.298	313.023	289.123	328.018	287.123	299.777	301.647	387.869	393.177	442.443	347.006	265.727	279.343
Itgb3	3.72726	0.0670884	0.674626	12.2753	0.0312039	0.309626		9.02002	4.01	4.32417	0.979672	1.08749	2.95304	3.71862	1.15907	4.25368	1.59881	1.6899	10.5236	6.28078	5.36945	5.23125	0	1.16393
Calm1	253.471	-0.0866804	0.116671	12.2551	0.031455	0.311458		264.587	323.474	262.91	217.487	257.736	294.32	261.233	264.269	233.952	188.66	218.842	248.056	261.28	285.655	275.512	213.599	237.441
Ywhah	134.22	-0.270436	0.172777	12.2557	0.0314478	0.311458		223.496	211.194	106.375	105.805	119.624	139.777	160.83	115.907	107.405	111.917	133.502	129.29	138.805	117.054	112.472	114.428	133.852
Tfec	5.44338	0.599457	0.552776	12.2523	0.0314893	0.311468		2.00445	2.67334	6.91868	5.87803	4.34997	1.9687	7.43725	1.15907	4.25368	9.59288	10.1394	2.25505	6.28078	2.14778	6.10312	8.89994	10.4754
Cadm1	39.2424	1.43155	0.243914	12.2476	0.0315476	0.311716		17.0378	29.4067	20.756	16.6544	17.3999	49.2174	33.4676	48.6811	36.1562	29.578	26.1934	69.9067	64.692	56.9162	76.725	39.414	34.9178
Rpa2	4.72317	-1.27919	0.647339	12.2405	0.0316372	0.312271		7.01557	14.7033	2.5945	3.91869	1.08749	7.87479	8.3669	8.11352	3.19026	3.99703	4.22474	4.51011	3.76847	3.22167	0	2.54284	1.16393
Zfp36	26.1718	-0.59105	0.256328	12.2162	0.0319428	0.314956		45.1001	29.4067	32.8637	43.1056	47.8496	5.90609	18.5931	15.068	24.4586	20.7846	19.4338	13.5303	19.4704	21.4778	33.1312	27.9712	26.7704
Ing4	13.5832	-0.0115135	0.342772	12.2041	0.0320956	0.31613		13.0289	6.68334	13.8374	17.6341	19.5749	9.84348	8.3669	10.4317	11.6976	13.5899	21.1237	11.2753	6.90886	11.8128	13.0781	15.257	26.7704
Nudt16	6.03133	0.514723	0.535853	12.1974	0.0321802	0.316298		6.01335	1.33667	6.05384	9.79672	1.08749	5.90609	3.71862	3.47722	4.25368	15.1887	5.91464	5.26179	7.53694	3.22167	5.23125	12.7142	5.81964
Shmt2	7.40351	0.468387	0.463729	12.1991	0.032159	0.316298		9.02002	12.03	3.45934	5.87803	3.26248	4.92174	6.50759	11.5907	8.50735	5.59585	2.53485	5.26179	10.0492	17.1822	5.23125	10.1714	4.65571
Birc5	4.07145	0.0297367	0.687441	12.1911	0.0322608	0.316758		2.00445	8.02001	9.51318	0	2.17498	4.92174	5.57794	2.31815	5.3171	1.59881	2.53485	3.00674	7.53694	6.44334	6.975	1.27142	0
Atox1	146.34	-0.0614151	0.150476	12.1791	0.0324146	0.317694		150.334	144.36	135.779	150.869	176.174	115.169	118.996	119.385	152.069	188.66	191.803	118.766	110.542	150.345	150.834	130.956	182.737
Kpnb1	31.4748	-0.509565	0.249287	12.1784	0.032424	0.317694		36.0801	53.4667	23.3505	29.3902	32.6248	51.1861	34.3973	38.2494	25.5221	29.578	27.0384	30.0674	31.4039	33.2906	23.5406	11.4428	24.4425
Ikbkg	12.2173	-0.123182	0.377829	12.1686	0.0325491	0.318587		17.0378	28.07	8.64834	5.87803	13.0499	4.92174	10.2262	13.9089	13.8244	8.79347	10.1394	9.02021	8.16502	25.7734	9.59062	10.1714	10.4754
Herpud1	9.14373	0.509892	0.457816	12.1562	0.0327092	0.319274		3.00667	8.02001	5.18901	3.91869	16.3124	6.89044	10.2262	22.0224	6.38051	7.99406	8.44949	4.51011	6.28078	18.2561	8.71875	7.62852	11.6393
Snx5	123.802	-0.0776512	0.140297	12.1581	0.0326846	0.319274		137.305	112.28	153.941	152.829	139.199	107.294	78.0911	78.817	136.118	119.112	98.014	126.283	127.5	105.241	147.347	152.57	132.688
Tgfbr1	27.6556	-0.287713	0.324088	12.1552	0.0327216	0.319274		52.1157	44.11	17.2967	10.7764	15.2249	41.3426	38.1159	22.0224	24.4586	31.1769	41.4025	23.3022	32.032	25.7734	17.4375	11.4428	22.1146
Hilpda	6.1529	-0.632646	0.557472	12.1279	0.0330761	0.322255		19.0423	8.02001	1.72967	3.91869	5.43746	5.90609	10.2262	4.6363	5.3171	3.99703	8.44949	3.00674	5.6527	5.36945	0.871875	2.54284	10.4754
Myo10	16.6467	0.0307702	0.315069	12.1264	0.0330959	0.322255		19.0423	25.3967	11.2428	10.7764	11.9624	20.6713	25.1007	24.3406	13.8244	14.3893	9.29444	17.2887	19.4704	20.4039	13.95	16.5285	9.31143
Nasp	6.26952	-0.504954	0.501584	12.115	0.0332458	0.323378		8.0178	10.6933	4.32417	4.89836	7.61244	9.84348	5.57794	12.7498	1.06342	3.19763	4.22474	6.76516	5.02462	10.7389	3.4875	2.54284	5.81964
Crbn	8.72746	0.208441	0.470538	12.0983	0.033465	0.325096		6.01335	2.67334	6.05384	11.7561	10.8749	10.8278	6.50759	4.6363	18.0781	9.59288	9.29444	3.75842	6.28078	2.14778	9.59062	13.9856	16.295
Ggact	4.29485	-0.137137	0.642798	12.0937	0.0335265	0.325096		5.01112	1.33667	7.78351	1.95934	4.34997	7.87479	3.71862	0	7.44393	3.99703	3.37979	8.26853	8.16502	1.07389	2.61562	2.54284	3.49178
Mthfd2	14.2847	-0.0366106	0.333346	12.0942	0.0335194	0.325096		16.0356	22.7234	11.2428	8.81705	15.2249	9.84348	17.6635	22.0224	9.57077	13.5899	11.8293	12.7786	15.702	25.7734	9.59062	7.62852	12.8032
Unc13d	8.00793	0.377393	0.466497	12.0802	0.0337055	0.326494		3.00667	4.01	5.18901	9.79672	11.9624	6.89044	7.43725	6.95444	8.50735	11.9911	10.9843	3.00674	4.39655	3.22167	12.2062	11.4428	15.1311
Tsr1	6.03267	-0.651325	0.609177	12.0673	0.0338777	0.327822		16.0356	13.3667	2.5945	1.95934	4.34997	10.8278	1.85931	6.95444	3.19026	1.59881	10.1394	4.51011	10.6773	3.22167	1.74375	2.54284	6.98357
St3gal5	25.6286	0.724534	0.282856	12.0597	0.0339794	0.328467		20.0445	25.3967	12.9725	11.7561	13.0499	39.3739	39.0455	44.0448	26.5855	22.3834	14.3641	27.8123	31.4039	34.3645	23.5406	21.6141	27.9343
Gpi1	79.8517	0.469004	0.173087	12.0466	0.0341548	0.329823		72.1602	90.8934	51.8901	51.9226	55.4621	88.5913	97.6139	91.5668	78.693	84.7371	59.9914	86.4437	86.0467	125.645	86.3156	75.0138	74.4914
Slc2a6	9.05145	0.841215	0.522206	12.0424	0.0342118	0.330033		1.00222	1.33667	10.378	8.81705	4.34997	8.85913	10.2262	17.3861	26.5855	11.1917	4.22474	3.00674	12.5616	6.44334	13.95	8.89994	4.65571
Tep1	22.5762	0.139073	0.30262	12.0132	0.034607	0.33316		15.0334	13.3667	23.3505	32.3292	28.2748	8.85913	13.0152	30.1359	29.7757	32.7757	23.6586	18.0404	21.9827	15.0345	22.6687	36.8712	18.6229
Tmem35b	5.66157	-0.0390797	0.548874	12.0158	0.0345718	0.33316		1.00222	1.33667	12.1077	8.81705	11.9624	5.90609	0	2.31815	4.25368	7.19466	5.91464	5.26179	4.39655	4.29556	6.975	6.3571	8.1475
Ypel2	2.23614	-0.374174	0.902453	12.0075	0.0346848	0.333565		0	0	5.18901	4.89836	2.17498	2.95304	0.929656	0	5.3171	5.59585	1.6899	1.50337	1.25616	0	1.74375	1.27142	3.49178
Aida	25.6704	-0.374237	0.287467	12.0025	0.0347536	0.333801		16.0356	28.07	29.4044	42.1259	29.3623	24.6087	15.8041	30.1359	45.727	23.1828	22.8136	11.2753	13.1896	28.995	20.925	27.9712	26.7704
Asf1b	2.18645	-0.846447	0.927629	11.9927	0.0348875	0.333801		2.00445	6.68334	1.72967	0.979672	1.08749	3.93739	4.64828	1.15907	1.06342	0.799406	0	5.26179	4.39655	2.14778	0	1.27142	0
Rab29	7.77684	0.511503	0.50211	11.995	0.0348567	0.333801		0	2.67334	12.9725	6.8577	10.8749	7.87479	2.78897	4.6363	12.761	11.1917	11.8293	6.76516	8.79309	3.22167	9.59062	8.89994	10.4754
Tram1	46.4103	0.000452658	0.21861	11.9944	0.0348648	0.333801		32.0712	66.8334	51.8901	37.2275	39.1497	60.0452	41.8345	57.9537	38.2831	44.7668	34.6429	56.3763	48.9901	55.8423	48.825	52.1282	22.1146
Uchl1	10.2289	1.27505	0.503284	11.9989	0.0348026	0.333801		6.01335	13.3667	4.32417	0.979672	1.08749	11.8122	13.9448	19.7043	13.8244	11.9911	10.9843	9.7719	13.8177	13.9606	20.0531	1.27142	6.98357
Cnep1r1	8.68525	0.360464	0.42947	11.9473	0.0355174	0.339481		11.0245	6.68334	10.378	4.89836	5.43746	2.95304	12.0855	8.11352	15.9513	7.99406	10.1394	3.75842	15.0739	6.44334	8.71875	6.3571	11.6393
Lrp8	1.72243	-0.886231	1.04911	11.9376	0.0356533	0.340086		8.0178	6.68334	0.864834	0	0	0.984348	1.85931	2.31815	0	0	0.844949	3.00674	1.88423	1.07389	1.74375	0	0
Nlrp3	4.04225	-0.143393	0.761774	11.9401	0.0356183	0.340086		5.01112	1.33667	0.864834	3.91869	3.26248	6.89044	16.7338	8.11352	2.12684	0	1.6899	3.00674	8.16502	2.14778	1.74375	2.54284	1.16393
Phf20	12.503	-0.264579	0.361165	11.9322	0.035729	0.340462		8.0178	9.35668	19.8912	20.5731	9.78743	8.85913	12.0855	11.5907	17.0147	16.7875	14.3641	8.26853	6.90886	5.36945	16.5656	17.7999	9.31143
Dubr	2.84481	-1.82583	0.788841	11.9223	0.0358684	0.341165		5.01112	10.6933	7.78351	0.979672	6.52495	0	0.929656	4.6363	0	0	0.844949	2.25505	0.628078	4.29556	2.61562	0	1.16393
Isoc1	10.3166	-0.494517	0.395498	11.9218	0.0358757	0.341165		7.01557	9.35668	19.8912	18.6138	7.61244	7.87479	9.29656	10.4317	17.0147	9.59288	8.44949	5.26179	6.28078	5.36945	17.4375	8.89994	6.98357
Acp2	46.3635	-0.420974	0.208596	11.8821	0.0364391	0.345471		37.0823	37.4267	52.7549	83.2721	76.1244	42.327	35.3269	40.5676	40.4099	55.9585	42.2474	31.5707	39.5689	35.4384	38.3625	50.8568	48.885
Lin7c	20.7375	-0.150523	0.297364	11.8866	0.0363757	0.345471		27.0601	32.08	30.2692	14.6951	8.69993	29.5304	18.5931	11.5907	17.0147	14.3893	15.2091	33.8258	22.6108	21.4778	22.6687	16.5285	16.295
Mink1	15.2767	-0.0386389	0.345784	11.8825	0.0364335	0.345471		12.0267	5.34667	18.1615	26.4511	18.4874	15.7496	6.50759	13.9089	10.6342	25.581	14.3641	13.5303	11.9335	9.66501	13.95	17.7999	25.6064
Crebrf	8.52734	0.492833	0.463861	11.8678	0.0366443	0.347065		5.01112	0	13.8374	5.87803	10.8749	3.93739	6.50759	6.95444	12.761	15.9881	10.9843	6.76516	6.28078	6.44334	15.6937	8.89994	8.1475
Tnip1	23.6754	0.0860923	0.280305	11.8592	0.0367689	0.347893		24.0534	8.02001	19.8912	24.4918	28.2748	19.687	39.0455	22.0224	30.8392	31.1769	29.5732	17.2887	32.6601	13.9606	21.7969	15.257	24.4425
Actl6a	9.98462	-0.499759	0.419711	11.8425	0.0370108	0.349476		13.0289	20.05	6.05384	9.79672	5.43746	13.7809	15.8041	17.3861	7.44393	8.79347	6.75959	5.26179	6.90886	12.8867	7.84687	10.1714	2.32786
Maf1	24.1424	-0.109524	0.286219	11.8434	0.036997	0.349476		23.0512	12.03	32.8637	28.4105	23.9248	23.6244	23.2414	12.7498	29.7757	33.5751	28.7283	24.0539	11.9335	18.2561	19.1812	39.414	25.6064
Tmem165	23.753	-0.445384	0.328844	11.8277	0.0372268	0.351161		55.1223	49.4567	19.0264	9.79672	16.3124	33.4678	29.749	17.3861	18.0781	13.5899	17.7439	21.0472	21.9827	19.33	21.7969	17.7999	22.1146
Zup1	7.87943	-0.283726	0.452227	11.8045	0.0375664	0.354009		3.00667	9.35668	11.2428	15.6748	11.9624	0.984348	6.50759	8.11352	9.57077	5.59585	7.60454	3.75842	2.51231	6.44334	9.59062	12.7142	9.31143
Gcnt1	44.0575	1.33168	0.23949	11.7881	0.0378098	0.355945		23.0512	21.3867	12.1077	18.6138	18.4874	89.5757	57.6387	46.363	61.6783	46.3656	44.7823	73.6651	55.899	39.7339	43.5937	48.3139	47.7211
Scamp2	45.6836	-0.0959996	0.242743	11.7763	0.0379853	0.357238		19.0423	30.7434	54.4846	71.5161	70.687	36.4209	36.2566	49.8402	62.7417	46.3656	43.9373	38.3359	36.4285	33.2906	47.9531	50.8568	47.7211
Csf2rb	45.4381	-0.601124	0.212346	11.7688	0.0380972	0.357686		86.1913	38.7634	51.8901	51.9226	43.4997	46.2644	61.3573	33.6131	48.9173	39.9703	53.2318	44.3494	45.8497	32.2167	35.7469	33.0569	25.6064
Nmi	10.5092	0.168663	0.430672	11.7673	0.0381198	0.357686		3.00667	5.34667	13.8374	11.7561	15.2249	3.93739	4.64828	13.9089	22.3318	16.7875	13.5192	6.76516	8.79309	6.44334	9.59062	7.62852	15.1311
Sidt2	22.63	-0.308961	0.289932	11.7654	0.0381476	0.357686		31.069	6.68334	32.8637	32.3292	26.0998	21.6557	22.3117	18.5452	25.5221	21.584	21.1237	21.0472	22.6108	10.7389	29.6437	29.2427	11.6393
Atg2a	7.44974	0.00598952	0.462362	11.7364	0.038584	0.360056		3.00667	5.34667	7.78351	9.79672	8.69993	6.89044	2.78897	8.11352	11.6976	11.1917	10.1394	6.76516	2.51231	4.29556	10.4625	10.1714	6.98357
Dmac2	4.65635	-0.184741	0.627115	11.7399	0.0385306	0.360056		0	0	5.18901	9.79672	9.78743	4.92174	3.71862	2.31815	7.44393	6.39525	6.75959	4.51011	1.88423	2.14778	3.4875	3.81426	6.98357
Fam234a	32.0597	0.245971	0.258999	11.7351	0.0386035	0.360056		19.0423	18.7134	36.323	44.0852	30.4498	26.5774	26.96	27.8178	37.2197	30.3774	36.3328	36.0809	25.1231	24.6995	38.3625	63.571	23.2786
Mif	89.9317	0.326962	0.165503	11.7307	0.0386694	0.360056		79.1757	89.5567	69.1868	71.5161	80.4744	97.4505	105.051	106.635	99.9614	60.7549	68.4408	101.477	117.451	125.645	102.009	73.7423	80.3111
Tmbim1	28.5843	-0.262925	0.272063	11.7379	0.038561	0.360056		46.1023	36.09	17.2967	19.5934	22.8373	33.4678	31.6083	34.7722	23.3952	27.9792	49.007	26.309	25.1231	26.8473	13.95	17.7999	33.7539
Tsc22d2	6.26409	-0.501605	0.510983	11.7318	0.038654	0.360056		6.01335	4.01	2.5945	14.6951	7.61244	7.87479	7.43725	3.47722	4.25368	9.59288	9.29444	6.01348	6.28078	2.14778	1.74375	7.62852	5.81964
Zmiz1	46.694	-0.131135	0.211002	11.7416	0.0385053	0.360056		67.149	30.7434	46.7011	48.9836	34.7997	60.0452	66.9352	40.5676	55.2978	37.5721	45.6272	50.3629	57.1551	41.8817	32.2594	38.1426	39.5736
Runx2	1.65177	-0.689907	1.09879	11.727	0.038726	0.360225		9.02002	2.67334	0	0	1.08749	2.95304	0.929656	1.15907	0	0.799406	0	2.25505	2.51231	2.14778	0	2.54284	0
Msrb1	66.5846	0.394186	0.193694	11.7231	0.0387859	0.360424		43.0957	44.11	85.6186	65.638	63.0745	55.1235	39.9752	81.1352	62.7417	58.3567	67.5959	66.1482	62.1797	88.059	106.369	63.571	79.1471
Folr2	14.367	0.787457	0.355726	11.7096	0.0389907	0.361968		13.0289	9.35668	14.7022	6.8577	7.61244	15.7496	12.0855	16.227	17.0147	11.1917	5.91464	18.7921	18.8423	30.0689	21.7969	20.3427	4.65571
Ddx27	5.53536	-0.527646	0.564714	11.7056	0.0390529	0.362187		12.0267	8.02001	0.864834	7.83738	6.52495	2.95304	9.29656	8.11352	1.06342	4.79644	4.22474	7.51684	6.28078	2.14778	1.74375	2.54284	8.1475
Rps2-ps10	232.398	-0.887079	0.140573	11.7012	0.0391189	0.36244		407.905	457.14	345.069	286.064	286.01	194.901	187.79	155.316	132.927	139.896	165.61	235.277	190.308	221.221	228.431	155.113	161.786
Btk	15.9425	-0.405497	0.331462	11.6963	0.0391939	0.362586		18.04	2.67334	21.6209	21.5528	18.4874	25.5931	22.3117	9.27259	18.0781	17.5869	17.7439	16.5371	14.4458	8.59112	13.0781	11.4428	13.9671
Rnasel	20.2406	-0.578842	0.366368	11.6952	0.0392121	0.362586		4.0089	13.3667	51.8901	46.0446	30.4498	12.7965	13.9448	12.7498	23.3952	19.1858	14.3641	19.5438	18.2143	9.66501	20.0531	21.6141	12.8032
Oas1c	3.38887	0.639836	0.739125	11.6867	0.0393422	0.36343		0	1.33667	3.45934	2.93902	6.52495	0.984348	0	5.79537	6.38051	7.19466	1.6899	2.25505	1.25616	3.22167	6.10312	3.81426	4.65571
Klf6	63.0852	0.124524	0.204834	11.6799	0.0394466	0.364035		35.0779	53.4667	68.3219	74.4551	64.162	56.1078	50.2014	64.9081	95.7077	73.5454	74.3555	41.3426	65.9482	42.9556	64.5187	63.571	83.8028
Rnase6	2.00929	-0.876547	1.00608	11.6643	0.039689	0.365912		0	0	3.45934	9.79672	3.26248	0	0.929656	0	4.25368	3.99703	1.6899	0.751684	0	1.07389	2.61562	0	2.32786
Mapre2	15.8952	-0.232233	0.335393	11.6494	0.0399215	0.367694		12.0267	9.35668	20.756	28.4105	18.4874	18.7026	8.3669	11.5907	21.2684	15.1887	14.3641	10.5236	9.42117	12.8867	29.6437	15.257	13.9671
Chaf1a	2.14313	-0.862462	0.988224	11.6357	0.0401359	0.369306		3.00667	6.68334	0	0.979672	3.26248	3.93739	0.929656	5.79537	0	0	3.37979	2.25505	3.76847	0	0	1.27142	1.16393
Kif5b	27.5824	0.0705734	0.252743	11.621	0.0403667	0.371064		37.0823	18.7134	24.2154	20.5731	20.6623	33.4678	47.4124	28.9768	32.966	21.584	26.1934	30.8191	32.6601	26.8473	27.0281	15.257	24.4425
Misp3	1.97907	1.31982	0.985852	11.616	0.0404458	0.371427		1.00222	0	2.5945	1.95934	0	0.984348	0	1.15907	6.38051	2.39822	0.844949	2.25505	2.51231	0	7.84687	2.54284	1.16393
Fcrls	6.59579	-2.40724	0.563105	11.6113	0.0405194	0.371739		13.0289	4.01	13.8374	20.5731	6.52495	10.8278	8.3669	4.6363	5.3171	6.39525	2.53485	6.01348	1.88423	2.14778	3.4875	2.54284	0
Coro1b	71.8475	-0.035747	0.172151	11.6015	0.0406751	0.372802		57.1268	58.8134	96.8615	84.2518	81.5619	60.0452	43.6938	73.0217	74.4393	81.5395	74.3555	71.41	60.2955	64.4334	75.8531	91.5422	72.1636
Vrk3	7.99513	0.320424	0.500081	11.5916	0.0408336	0.373889		4.0089	4.01	6.91868	8.81705	8.69993	1.9687	6.50759	13.9089	4.25368	13.5899	11.8293	7.51684	1.88423	15.0345	2.61562	12.7142	11.6393
Fdft1	15.9952	-2.05115	0.40365	11.5832	0.0409681	0.374175		34.0756	25.3967	67.4571	34.2885	8.69993	11.8122	13.9448	8.11352	7.44393	5.59585	5.06969	9.7719	12.5616	9.66501	4.35937	10.1714	3.49178
Spc25	4.04764	-0.348335	0.639937	11.5844	0.0409482	0.374175		5.01112	9.35668	5.18901	4.89836	0	3.93739	7.43725	2.31815	3.19026	1.59881	0.844949	6.76516	5.02462	6.44334	4.35937	1.27142	1.16393
Tox2	1.50203	1.0053	1.18438	11.5821	0.0409847	0.374175		1.00222	4.01	0	0	0	0	2.78897	5.79537	1.06342	0.799406	1.6899	0.751684	3.14039	3.22167	0	1.27142	0
Tbxas1	34.7776	-0.275502	0.275059	11.5631	0.0412896	0.376592		59.1312	81.5367	31.9989	21.5528	20.6623	41.3426	32.538	25.4996	26.5855	24.7816	22.8136	31.5707	40.8251	36.5123	39.2344	26.6998	27.9343
Fubp1	11.7302	0.181416	0.391481	11.5438	0.0416021	0.379073		29.0645	17.3767	4.32417	7.83738	8.69993	7.87479	13.0152	10.4317	5.3171	4.79644	7.60454	14.282	14.4458	20.4039	13.0781	12.7142	8.1475
Rras	24.8933	0.288462	0.276429	11.5263	0.0418881	0.381307		13.0289	14.7033	28.5395	27.4308	26.0998	22.64	24.1711	23.1815	37.2197	25.581	26.1934	14.282	17.5862	20.4039	27.9	38.1426	36.0818
Ranbp10	11.3554	0.305897	0.388281	11.5233	0.0419371	0.381384		5.01112	2.67334	17.2967	12.7357	13.0499	13.7809	9.29656	6.95444	12.761	15.1887	5.91464	17.2887	8.16502	8.59112	17.4375	15.257	11.6393
Gm20559	14.5972	-0.374148	0.416395	11.5103	0.0421508	0.382955		3.00667	9.35668	28.5395	25.4715	17.3999	5.90609	13.9448	16.227	30.8392	19.1858	16.054	6.01348	8.79309	10.7389	5.23125	13.9856	17.4589
Ppic	8.32004	0.366599	0.472904	11.4922	0.0424483	0.385284		9.02002	0	11.2428	6.8577	5.43746	14.7652	13.0152	8.11352	9.57077	3.99703	4.22474	10.5236	15.702	4.29556	11.3344	6.3571	6.98357
Pik3r5	29.659	0.338705	0.26696	11.4886	0.0425088	0.385459		29.0645	13.3667	28.5395	22.5325	30.4498	26.5774	55.7794	25.4996	27.6489	17.5869	32.953	41.3426	43.9655	27.9211	25.2844	25.4284	30.2621
Myo1e	24.4528	-0.490882	0.270598	11.4855	0.0425599	0.38555		54.1201	33.4167	25.945	26.4511	20.6623	17.7183	19.5228	24.3406	19.1415	17.5869	14.3641	33.8258	28.2635	28.995	21.7969	19.0713	10.4754
Crybg1	6.78303	-0.217864	0.519485	11.4531	0.0431006	0.390043		1.00222	4.01	12.9725	16.6544	8.69993	2.95304	1.85931	6.95444	9.57077	6.39525	9.29444	1.50337	5.02462	9.66501	7.84687	5.08568	5.81964
Rpl12	200.312	0.156152	0.135499	11.4508	0.0431392	0.390043		216.48	220.55	232.64	158.707	159.861	191.948	192.439	179.656	158.449	159.881	179.974	260.835	246.835	254.512	253.716	166.556	172.261
Rwdd4a	6.50687	-0.477017	0.494258	11.4354	0.0433987	0.392011		12.0267	8.02001	7.78351	2.93902	5.43746	8.85913	12.0855	9.27259	4.25368	2.39822	3.37979	6.76516	8.79309	7.51723	2.61562	3.81426	4.65571
Vps35l	18.4834	-0.338598	0.299381	11.4198	0.0436626	0.394015		14.0311	17.3767	28.5395	35.2682	19.5749	15.7496	8.3669	15.068	21.2684	16.7875	17.7439	11.2753	13.8177	15.0345	23.5406	27.9712	12.8032
Eif2ak2	9.38913	-0.443787	0.445868	11.4042	0.0439295	0.396042		3.00667	6.68334	14.7022	23.5121	8.69993	8.85913	8.3669	9.27259	12.761	9.59288	5.91464	6.01348	2.51231	11.8128	13.0781	10.1714	4.65571
Gm35368	6.15825	-2.14413	0.537355	11.3748	0.0444343	0.400208		24.0534	21.3867	17.2967	3.91869	5.43746	2.95304	2.78897	2.31815	2.12684	1.59881	1.6899	3.00674	5.02462	4.29556	4.35937	1.27142	1.16393
Manbal	12.4695	-0.215995	0.390689	11.3679	0.0445546	0.400906		14.0311	2.67334	10.378	14.6951	23.9248	16.7339	13.9448	10.4317	6.38051	19.1858	8.44949	13.5303	12.5616	5.36945	6.975	15.257	17.4589
Igfbp4	48.7049	-0.0593041	0.251523	11.3349	0.0451301	0.405695		30.0667	40.1	51.8901	52.9023	29.3623	120.09	67.8649	48.6811	41.4733	43.9674	42.2474	50.3629	45.2216	33.2906	48.825	43.2283	38.4096
Pgap2	14.8013	-0.166195	0.343696	11.3316	0.0451878	0.405823		7.01557	8.02001	19.8912	28.4105	29.3623	9.84348	10.2262	9.27259	11.6976	13.5899	11.8293	12.027	8.79309	12.8867	21.7969	24.157	12.8032
Pfkl	7.44971	-0.482535	0.486413	11.3212	0.0453711	0.406901		10.0222	13.3667	3.45934	7.83738	4.34997	7.87479	8.3669	15.068	7.44393	7.19466	5.91464	6.76516	3.14039	13.9606	4.35937	6.3571	1.16393
Srp14	55.2362	0.140631	0.20276	11.3198	0.0453946	0.406901		52.1157	62.8234	64.8626	34.2885	52.1996	55.1235	62.2869	59.1128	68.0588	39.9703	33.7979	57.128	43.3374	69.8029	77.5968	48.3139	58.1964
Tmem256	63.0814	-0.0141472	0.194045	11.2921	0.045887	0.410922		74.1646	73.5167	76.9703	53.882	63.0745	54.1392	64.1463	55.6356	31.9026	43.1679	50.6969	93.9606	91.0713	80.5418	64.5187	38.1426	62.8521
Tmem202	2.02901	-1.82515	0.954449	11.2837	0.0460357	0.411859		6.01335	6.68334	1.72967	1.95934	1.08749	1.9687	4.64828	2.31815	2.12684	0	0	0	3.14039	1.07389	1.74375	0	0
Cacybp	22.3374	0.293866	0.275482	11.2772	0.0461531	0.412122		12.0267	29.4067	22.4857	17.6341	16.3124	26.5774	14.8745	32.4541	24.4586	14.3893	23.6586	23.3022	16.9581	32.2167	23.5406	20.3427	29.0982
Nucks1	22.7004	-0.167924	0.281751	11.2772	0.0461519	0.412122		19.0423	37.4267	26.8099	12.7357	23.9248	23.6244	29.749	32.4541	19.1415	15.1887	16.054	27.0606	25.7512	23.6256	20.925	11.4428	20.9507
Ddost	56.1612	0.347667	0.19198	11.2689	0.0463009	0.41231		28.0623	54.8034	70.0516	45.0649	53.2871	53.1548	42.7642	67.2263	68.0588	46.3656	54.9217	56.3763	56.527	67.6551	75.8531	61.0281	53.5407
Oaf	1.72639	-2.2934	1.16522	11.2695	0.0462908	0.41231		7.01557	5.34667	0.864834	0.979672	0	0.984348	5.57794	2.31815	4.25368	0	0	0.751684	1.25616	0	0	0	0
Sgsh	15.5516	-0.0676109	0.332452	11.2686	0.0463062	0.41231		8.0178	9.35668	20.756	29.3902	22.8373	9.84348	10.2262	5.79537	19.1415	17.5869	14.3641	18.7921	15.0739	11.8128	15.6937	22.8856	12.8032
Clta	129.58	-0.186839	0.163714	11.2649	0.0463744	0.412525		151.336	155.053	153.941	127.357	106.574	131.903	188.72	103.158	103.152	114.315	106.464	163.867	135.037	114.906	141.244	108.071	97.77
Itgb2	131.364	0.0808816	0.175453	11.2603	0.0464556	0.412807		172.383	147.033	148.752	84.2518	76.1244	161.433	147.815	135.612	157.386	108.719	105.619	127.035	117.451	152.492	140.372	115.699	135.016
Ocrl	4.40336	-0.191074	0.623459	11.2582	0.0464943	0.412807		6.01335	5.34667	8.64834	1.95934	3.26248	7.87479	4.64828	1.15907	2.12684	0.799406	0.844949	6.01348	4.39655	7.51723	9.59062	0	4.65571
Wtip	2.32432	-0.624248	0.878472	11.2438	0.0467544	0.414724		5.01112	5.34667	0.864834	0.979672	1.08749	7.87479	0.929656	2.31815	0	0.799406	0.844949	4.51011	2.51231	2.14778	1.74375	2.54284	0
Gsta3	5.19078	0.472189	0.800767	11.2331	0.0469492	0.415664		14.0311	13.3667	0	0	0	6.89044	6.50759	11.5907	1.06342	5.59585	3.37979	3.00674	5.02462	6.44334	4.35937	0	6.98357
Slc12a9	4.25338	-0.0440094	0.64185	11.2333	0.0469455	0.415664		2.00445	0	5.18901	13.7154	5.43746	1.9687	2.78897	1.15907	8.50735	6.39525	2.53485	0.751684	3.76847	3.22167	5.23125	3.81426	5.81964
Cmtr1	14.395	-0.207157	0.353295	11.2258	0.0470823	0.416449		6.01335	10.6933	12.9725	18.6138	25.0123	7.87479	13.0152	23.1815	19.1415	23.1828	18.5889	6.76516	8.16502	11.8128	13.95	15.257	10.4754
Capza2	131.632	-0.189975	0.158887	11.205	0.0474644	0.419433		108.24	160.4	146.157	160.666	145.724	106.31	114.348	126.339	159.513	123.908	148.711	97.719	99.8644	88.059	133.397	158.927	159.458
Gmpr	4.5084	0.10456	0.630517	11.2001	0.0475538	0.419827		2.00445	8.02001	5.18901	0.979672	2.17498	8.85913	4.64828	6.95444	7.44393	3.99703	1.6899	5.26179	3.76847	5.36945	7.84687	1.27142	1.16393
Hmgb2	13.2761	0.148162	0.414353	11.1784	0.0479561	0.42263		8.0178	14.7033	10.378	13.7154	10.8749	16.7339	13.9448	11.5907	27.6489	7.19466	2.53485	15.0337	16.33	20.4039	24.4125	6.3571	5.81964
Ms4a14	19.3413	0.146488	0.313786	11.1781	0.0479615	0.42263		13.0289	6.68334	21.6209	20.5731	15.2249	15.7496	31.6083	20.8633	23.3952	37.5721	25.3485	12.027	13.1896	9.66501	18.3094	24.157	19.7868
Abhd17c	20.5912	-0.103627	0.296072	11.1746	0.0480251	0.422767		26.0578	18.7134	15.567	13.7154	18.4874	33.4678	32.538	32.4541	17.0147	12.7905	21.9687	15.0337	25.7512	22.5517	14.8219	13.9856	15.1311
Cd36	243.942	-0.820968	0.385523	11.1724	0.0480674	0.422767		741.646	834.081	165.183	108.744	197.923	167.339	142.237	190.088	148.879	124.707	203.633	175.142	208.522	251.29	195.3	111.885	180.409
Mmgt1	5.35849	-1.20441	0.540484	11.164	0.0482236	0.423346		13.0289	14.7033	4.32417	5.87803	4.34997	7.87479	5.57794	2.31815	2.12684	2.39822	2.53485	7.51684	6.28078	4.29556	1.74375	3.81426	2.32786
Sertad3	5.7081	0.231878	0.566722	11.1651	0.0482036	0.423346		2.00445	1.33667	6.91868	6.8577	9.78743	2.95304	5.57794	4.6363	9.57077	8.79347	3.37979	3.75842	3.76847	0	9.59062	7.62852	10.4754
Keap1	17.7628	-0.398281	0.372305	11.1587	0.0483225	0.423817		13.0289	5.34667	27.6747	33.3088	22.8373	8.85913	11.1559	19.7043	32.966	22.3834	16.899	15.7854	6.28078	19.33	23.5406	8.89994	13.9671
Emb	32.055	0.273513	0.280914	11.1458	0.0485648	0.425544		32.0712	13.3667	48.4307	21.5528	14.1374	46.2644	59.498	28.9768	30.8392	32.7757	28.7283	33.8258	33.2881	24.6995	34.0031	36.8712	25.6064
Rap2b	58.7486	-0.0466415	0.197206	11.1433	0.0486122	0.425561		72.1602	57.4767	38.0527	57.8006	67.4245	66.9357	66.9352	60.2718	57.4246	46.3656	51.5419	72.1617	70.9728	62.2856	31.3875	50.8568	68.6718
Dnpep	9.81756	1.15084	0.435791	11.1242	0.0489723	0.428314		3.00667	6.68334	8.64834	3.91869	7.61244	6.89044	6.50759	8.11352	15.9513	17.5869	8.44949	4.51011	8.16502	15.0345	17.4375	19.0713	9.31143
Tet2	4.17618	0.127181	0.623443	11.1195	0.049062	0.428698		4.0089	2.67334	6.91868	6.8577	1.08749	0	4.64828	5.79537	6.38051	5.59585	2.53485	2.25505	4.39655	2.14778	4.35937	10.1714	1.16393
Eid1	36.6941	0.105168	0.26802	11.1108	0.0492261	0.42909		30.0667	61.4867	24.2154	34.2885	16.3124	54.1392	41.8345	60.2718	42.5368	24.7816	24.5035	37.5842	39.5689	31.1428	39.2344	29.2427	32.59
Gm10275	77.3461	0.113196	0.179713	11.1073	0.049293	0.42909		73.1624	100.25	81.2944	60.7397	75.0369	71.8574	81.8097	63.7491	65.932	61.5543	49.852	111.249	93.5836	112.758	92.4187	52.1282	67.5078
Mzt1	11.9183	0.57657	0.399294	11.1051	0.049336	0.42909		11.0245	9.35668	6.91868	3.91869	10.8749	14.7652	22.3117	10.4317	11.6976	8.79347	16.054	10.5236	13.8177	19.33	10.4625	2.54284	19.7868
Nosip	15.9016	0.440733	0.335471	11.1142	0.0491627	0.42909		7.01557	5.34667	16.4319	18.6138	19.5749	14.7652	10.2262	15.068	14.8879	23.1828	25.3485	9.02021	15.702	15.0345	17.4375	22.8856	19.7868
Trnau1ap	7.57173	0.249053	0.478557	11.1051	0.0493351	0.42909		13.0289	10.6933	3.45934	2.93902	2.17498	11.8122	12.0855	8.11352	4.25368	7.99406	5.06969	11.2753	9.42117	8.59112	4.35937	7.62852	5.81964
Lilr4b	215.867	-0.0964062	0.170194	11.0919	0.0495882	0.430884		304.676	264.66	141.833	195.934	215.323	154.543	237.992	258.473	225.445	227.031	230.671	214.982	220.455	267.399	175.247	136.042	199.032
Dad1	45.8539	0.172158	0.225261	11.0878	0.0496676	0.431174		47.1045	53.4667	46.7011	27.4308	33.7122	55.1235	56.709	70.7035	29.7757	34.3745	38.0227	48.8595	40.8251	57.9901	60.1594	34.3283	44.2293
Procr	4.38904	0.505057	0.683289	11.0812	0.0497942	0.431872		9.02002	8.02001	1.72967	0.979672	0	0.984348	7.43725	10.4317	1.06342	5.59585	5.91464	0.751684	4.39655	4.29556	4.35937	3.81426	5.81964
Gpr137b-ps	38.5947	0.0517158	0.221447	11.0653	0.0501011	0.434133		56.1246	49.4567	33.7285	28.4105	27.1873	32.4835	44.6235	40.5676	34.0294	39.1709	31.2631	44.3494	52.1305	49.3989	34.0031	25.4284	33.7539
Mrto4	9.43208	-0.375662	0.416513	11.0608	0.0501879	0.434482		14.0311	18.7134	6.05384	6.8577	7.61244	10.8278	6.50759	16.227	4.25368	7.99406	9.29444	13.5303	10.6773	9.66501	3.4875	7.62852	6.98357
Lyz2	2592.38	-0.229638	0.160212	11.0541	0.0503176	0.435203		2741.08	2071.84	5086.96	3562.09	2291.35	2316.17	2277.66	2041.13	1952.44	1988.12	1685.67	3095.44	2777.36	2559.08	2674.91	2783.14	2166.07
Sec23b	11.9728	0.0420993	0.370879	11.0502	0.0503938	0.43546		16.0356	16.04	6.91868	7.83738	9.78743	10.8278	14.8745	18.5452	8.50735	7.99406	14.3641	12.027	9.42117	22.5517	6.10312	8.89994	12.8032
Mast2	5.59104	-0.684046	0.527089	11.0247	0.0508915	0.438956		13.0289	12.03	3.45934	4.89836	4.34997	4.92174	5.57794	5.79537	2.12684	3.19763	4.22474	10.5236	8.16502	5.36945	2.61562	1.27142	3.49178
N4bp2l1	6.87446	0.326423	0.532737	11.0247	0.0508921	0.438956		1.00222	1.33667	8.64834	8.81705	6.52495	5.90609	7.43725	6.95444	12.761	11.9911	9.29444	4.51011	6.28078	0	6.975	11.4428	6.98357
Il16	3.53505	-0.712107	0.716693	11.0202	0.0509816	0.439324		1.00222	2.67334	5.18901	9.79672	2.17498	1.9687	1.85931	2.31815	3.19026	7.99406	7.60454	2.25505	0	2.14778	2.61562	3.81426	3.49178
Cd81	88.2093	0.627917	0.177152	11.0151	0.0510816	0.439781		55.1223	72.1801	65.7274	41.1462	45.6747	137.809	142.237	126.339	110.596	75.9436	96.3241	97.719	84.7905	86.9851	102.881	80.0994	77.9832
Ezr	13.1369	0.230619	0.407256	11.0057	0.051267	0.440971		11.0245	10.6933	12.1077	3.91869	9.78743	19.687	35.3269	15.068	18.0781	9.59288	5.06969	18.7921	11.9335	12.8867	12.2062	10.1714	6.98357
Fus	23.7791	-0.217027	0.318662	10.9959	0.0514608	0.442232		47.1045	29.4067	12.9725	9.79672	33.7122	23.6244	31.6083	22.0224	18.0781	24.7816	14.3641	33.0741	30.1477	15.0345	17.4375	17.7999	23.2786
Cdv3	28.1387	-0.28468	0.252079	10.9911	0.0515576	0.442428		37.0823	38.7634	19.0264	30.3698	23.9248	38.3896	32.538	39.4085	25.5221	19.1858	21.9687	27.8123	32.032	28.995	19.1812	26.6998	17.4589
Clec4a2	22.6735	-1.07165	0.325736	10.9862	0.0516537	0.442428		17.0378	17.3767	51.8901	34.2885	47.8496	19.687	22.3117	17.3861	18.0781	18.3863	25.3485	10.5236	8.79309	10.7389	11.3344	24.157	30.2621
Plekho2	80.3284	0.226538	0.200069	10.9888	0.0516033	0.442428		68.1513	80.2001	64.8626	112.662	79.3869	40.3583	64.1463	98.5213	72.3125	74.3448	80.2701	68.4033	72.8571	64.4334	95.0343	100.442	129.196
Sirpb1c	4.66435	0.395521	0.583289	10.9853	0.0516724	0.442428		2.00445	2.67334	6.05384	5.87803	5.43746	0	0.929656	6.95444	6.38051	7.19466	5.91464	3.00674	2.51231	4.29556	5.23125	10.1714	4.65571
Apex1	9.33693	0.0211135	0.461568	10.9801	0.0517752	0.442498		13.0289	18.7134	3.45934	4.89836	4.34997	17.7183	12.0855	10.4317	9.57077	6.39525	5.06969	6.01348	10.0492	15.0345	6.975	11.4428	3.49178
Erap1	14.046	0.1263	0.345216	10.9803	0.0517726	0.442498		6.01335	16.04	19.0264	18.6138	8.69993	6.89044	11.1559	16.227	20.205	17.5869	19.4338	8.26853	10.6773	10.7389	17.4375	17.7999	13.9671
Sparc	5.0558	-1.3354	0.748453	10.9684	0.0520096	0.444096		23.0512	12.03	0	1.95934	2.17498	7.87479	4.64828	4.6363	1.06342	7.19466	6.75959	0.751684	2.51231	3.22167	0.871875	2.54284	4.65571
Adrm1	26.4984	-0.140439	0.264839	10.9604	0.0521701	0.445061		30.0667	34.7534	16.4319	15.6748	30.4498	35.4365	34.3973	32.4541	19.1415	27.1798	32.108	26.309	25.7512	19.33	13.0781	24.157	33.7539
Vrk2	10.7379	0.381104	0.393705	10.9529	0.0523223	0.445953		8.0178	4.01	11.2428	11.7561	14.1374	5.90609	4.64828	11.5907	13.8244	11.1917	11.8293	6.76516	6.28078	9.66501	11.3344	22.8856	17.4589
Nop58	6.30819	-1.4377	0.551281	10.9461	0.0524582	0.446705		14.0311	20.05	8.64834	5.87803	2.17498	8.85913	10.2262	5.79537	1.06342	3.19763	3.37979	5.26179	6.90886	3.22167	2.61562	1.27142	4.65571
Ampd3	8.41589	0.101592	0.448639	10.9407	0.0525675	0.44723		11.0245	8.02001	5.18901	2.93902	8.69993	6.89044	17.6635	12.7498	7.44393	4.79644	12.6742	7.51684	10.6773	9.66501	2.61562	6.3571	8.1475
Kcnj2	4.3241	-0.43882	0.651734	10.9327	0.0527315	0.448218		15.0334	12.03	0.864834	1.95934	3.26248	1.9687	4.64828	5.79537	0	2.39822	1.6899	6.76516	5.02462	2.14778	2.61562	3.81426	3.49178
Prxl2b	20.4326	-0.0710087	0.285119	10.9289	0.0528086	0.448466		24.0534	9.35668	23.3505	20.5731	25.0123	24.6087	16.7338	10.4317	28.7123	23.1828	23.6586	18.0404	19.4704	11.8128	24.4125	24.157	19.7868
Ckap4	6.477	-0.229955	0.574541	10.9141	0.0531104	0.449915		18.04	13.3667	3.45934	0	5.43746	7.87479	11.1559	4.6363	3.19026	3.99703	0.844949	8.26853	7.53694	5.36945	6.975	7.62852	2.32786
Dguok	13.1383	0.0791302	0.356932	10.9139	0.0531141	0.449915		8.0178	9.35668	15.567	14.6951	19.5749	8.85913	7.43725	16.227	9.57077	15.1887	16.054	7.51684	8.16502	11.8128	12.2062	27.9712	15.1311
Hpse	55.9301	-0.569229	0.258764	10.9135	0.0531233	0.449915		50.1112	30.7434	130.59	127.357	90.2618	25.5931	40.9049	22.0224	42.5368	33.5751	39.7126	60.1348	56.527	45.1034	54.9281	62.2996	38.4096
Pdxk	39.7922	-0.238937	0.245096	10.9078	0.0532381	0.45048		29.0645	20.05	75.2406	59.76	56.5496	36.4209	28.8193	24.3406	35.0928	43.9674	28.7283	42.846	32.032	35.4384	37.4906	39.414	51.2128
Dut	4.94446	-0.904977	0.662999	10.9031	0.0533362	0.450903		2.00445	20.05	4.32417	1.95934	7.61244	8.85913	1.85931	2.31815	6.38051	1.59881	0.844949	9.7719	5.6527	5.36945	1.74375	2.54284	1.16393
Rnf149	65.3669	0.0770632	0.233145	10.8941	0.0535201	0.452049		113.251	60.1501	39.7824	47.0243	54.3746	67.92	100.403	89.2487	72.3125	43.9674	50.6969	47.3561	59.6674	74.0984	54.9281	67.3852	68.6718
1600010M07Rik	3.37094	0.0339865	0.672268	10.8854	0.0537011	0.45317		3.00667	1.33667	1.72967	5.87803	5.43746	4.92174	0.929656	0	2.12684	4.79644	2.53485	6.76516	3.14039	1.07389	2.61562	6.3571	4.65571
Nadk	33.235	-0.435526	0.237424	10.8817	0.0537768	0.4534		26.0578	30.7434	38.0527	44.0852	51.1121	33.4678	31.6083	34.7722	26.5855	41.5691	38.0227	22.5505	16.9581	22.5517	27.0281	35.5998	44.2293
Kpna4	36.9243	0.289104	0.239422	10.8748	0.0539189	0.454189		44.0979	29.4067	23.3505	19.5934	23.9248	48.2331	59.498	41.7267	37.2197	41.5691	51.5419	32.3224	42.7093	28.995	21.7969	30.5141	51.2128
Atp5g1	63.1645	0.0003209	0.213253	10.8705	0.054008	0.454531		89.198	82.8734	46.7011	40.1666	43.4997	78.7479	64.1463	98.5213	53.171	62.3537	54.9217	63.1415	57.1551	67.6551	68.0062	40.6854	62.8521
Ccl6	115.726	0.415718	0.18337	10.8605	0.0542161	0.455056		74.1646	48.12	83.0241	109.723	114.187	160.449	154.323	111.271	116.976	134.3	162.23	121.773	135.037	113.832	71.4937	128.413	128.032
Rps26-ps1	82.1413	-0.0559488	0.159094	10.8622	0.0541808	0.455056		85.1891	120.3	79.5648	71.5161	91.3493	78.7479	74.3725	85.7715	61.6783	59.9555	62.5262	99.2224	93.5836	103.093	92.4187	66.1138	70.9996
Tnfsf10	2.0338	-1.45607	1.02119	10.8633	0.0541584	0.455056		0	0	7.78351	6.8577	4.34997	0.984348	0	3.47722	2.12684	1.59881	0	0	0	1.07389	2.61562	2.54284	1.16393
Rufy3	22.2055	-0.0764581	0.293142	10.8468	0.0545034	0.457058		16.0356	12.03	36.323	33.3088	26.0998	8.85913	17.6635	19.7043	25.5221	32.7757	19.4338	22.5505	14.4458	19.33	23.5406	25.4284	24.4425
2510009E07Rik	4.83092	0.398934	0.657673	10.8299	0.054858	0.459555		10.0222	1.33667	0.864834	0.979672	5.43746	3.93739	10.2262	4.6363	2.12684	6.39525	8.44949	9.02021	5.6527	5.36945	1.74375	1.27142	4.65571
Cd53	240.354	0.00711515	0.121773	10.8233	0.0549975	0.459555		210.467	215.204	249.072	288.024	291.448	227.384	168.268	213.27	239.269	225.433	265.314	219.492	230.505	246.995	229.303	286.069	280.507
H2-T10	2.69607	-0.80983	0.947768	10.8259	0.0549432	0.459555		0	1.33667	0.864834	9.79672	11.9624	0	0	1.15907	5.3171	2.39822	4.22474	0	1.88423	1.07389	3.4875	0	2.32786
Spop	27.4936	-0.0263791	0.250643	10.8246	0.0549698	0.459555		23.0512	26.7334	26.8099	39.1869	29.3623	25.5931	13.9448	24.3406	27.6489	28.7786	30.4182	22.5505	15.702	30.0689	35.7469	40.6854	26.7704
Asb13	3.89918	-0.243188	0.714923	10.8188	0.0550944	0.459937		0	2.67334	5.18901	7.83738	9.78743	0	0.929656	6.95444	5.3171	5.59585	3.37979	1.50337	1.88423	2.14778	6.10312	0	6.98357
Glipr1	110.882	0.0986366	0.190564	10.8165	0.0551414	0.459937		120.267	74.8534	105.51	112.662	100.049	76.7792	95.7546	162.27	131.864	140.696	127.587	76.6718	72.229	108.463	105.497	155.113	118.721
Emp3	194.715	-0.016617	0.125211	10.8125	0.0552279	0.460248		186.414	248.62	178.156	185.158	181.611	195.885	169.197	214.429	202.05	183.064	196.873	199.196	174.606	260.955	200.531	157.656	175.753
P2ry1	2.44657	0.963683	0.869624	10.8089	0.0553033	0.460468		4.0089	5.34667	0.864834	0	0	1.9687	1.85931	4.6363	1.06342	0.799406	0	6.76516	3.76847	4.29556	2.61562	1.27142	2.32786
Pex6	9.92136	0.373125	0.447229	10.8043	0.0554008	0.46087		4.0089	5.34667	14.7022	16.6544	4.34997	5.90609	3.71862	17.3861	7.44393	11.1917	12.6742	9.02021	6.28078	10.7389	13.0781	20.3427	5.81964
Fabp3	7.05621	-0.638468	0.507967	10.7891	0.0557261	0.462754		5.01112	4.01	20.756	14.6951	8.69993	2.95304	0.929656	8.11352	5.3171	5.59585	1.6899	7.51684	3.14039	12.8867	11.3344	3.81426	3.49178
Spaca9	5.76255	-0.044047	0.549313	10.7891	0.0557248	0.462754		2.00445	2.67334	6.91868	10.7764	3.26248	8.85913	6.50759	2.31815	4.25368	11.9911	6.75959	8.26853	5.6527	1.07389	4.35937	7.62852	4.65571
Pla2g4a	2.98496	0.415154	0.913662	10.7805	0.0559109	0.463877		4.0089	9.35668	0	0	0	4.92174	1.85931	11.5907	2.12684	1.59881	2.53485	0.751684	4.39655	2.14778	1.74375	2.54284	1.16393
Ski	28.5591	0.120743	0.260682	10.7634	0.0562779	0.466509		27.0601	25.3967	24.2154	23.5121	21.7498	58.0765	28.8193	23.1815	19.1415	27.1798	29.5732	37.5842	38.3128	20.4039	25.2844	29.2427	26.7704
Cyb5a	51.0232	0.055108	0.21519	10.7606	0.0563378	0.466593		52.1157	65.4967	59.6736	36.2479	35.8872	48.2331	55.7794	78.817	38.2831	32.7757	56.6116	48.8595	59.6674	65.5073	45.3375	50.8568	37.2457
Il21r	14.6396	-0.187332	0.356922	10.7553	0.0564536	0.467138		20.0445	6.68334	6.91868	20.5731	19.5749	21.6557	18.5931	9.27259	14.8879	19.1858	9.29444	20.2955	19.4704	8.59112	13.0781	11.4428	9.31143
P4ha1	30.3738	-0.151624	0.249173	10.7503	0.0565628	0.467629		29.0645	41.4367	27.6747	34.2885	20.6623	25.5931	27.8897	59.1128	36.1562	31.1769	23.6586	22.5505	19.4704	32.2167	24.4125	33.0569	27.9343
Spryd7	16.382	-0.472814	0.363781	10.7179	0.0572685	0.473046		31.069	30.7434	6.05384	14.6951	21.7498	12.7965	18.5931	9.27259	13.8244	13.5899	11.8293	26.309	25.7512	10.7389	8.71875	7.62852	15.1311
Clec10a	2.10441	-1.91683	0.92236	10.7077	0.0574929	0.474481		2.00445	0	6.91868	7.83738	4.34997	1.9687	0	0	2.12684	3.19763	0.844949	2.25505	1.25616	0	1.74375	1.27142	0
Prmt1	16.1496	-0.158125	0.364214	10.6717	0.0582927	0.480658		30.0667	28.07	7.78351	13.7154	8.69993	22.64	17.6635	20.8633	7.44393	9.59288	16.054	10.5236	15.0739	22.5517	13.95	8.89994	20.9507
Cyp4f13	6.24041	0.45294	0.49313	10.6643	0.058458	0.481174		3.00667	4.01	10.378	5.87803	5.43746	1.9687	6.50759	4.6363	8.50735	8.79347	5.06969	2.25505	4.39655	7.51723	10.4625	11.4428	5.81964
Rsph9	2.07581	0.246974	0.911134	10.6658	0.0584242	0.481174		1.00222	0	6.91868	1.95934	1.08749	0.984348	0	1.15907	2.12684	2.39822	3.37979	0.751684	0	2.14778	5.23125	3.81426	2.32786
Knstrn	2.15056	-0.52993	0.949473	10.6572	0.0586157	0.482049		2.00445	4.01	7.78351	0	1.08749	3.93739	0.929656	1.15907	0	0	0	3.75842	5.6527	3.22167	1.74375	1.27142	0
Osgin1	13.7828	0.803854	0.400491	10.6541	0.0586851	0.482196		8.0178	12.03	1.72967	6.8577	10.8749	23.6244	13.9448	12.7498	8.50735	32.7757	22.8136	15.0337	14.4458	10.7389	8.71875	13.9856	17.4589
Cyth4	75.146	-0.279925	0.17668	10.6502	0.0587743	0.482506		78.1735	81.5367	66.5922	81.3128	80.4744	107.294	87.3877	64.9081	82.9467	59.1561	71.8206	94.7122	78.5098	63.3595	54.0562	49.5854	75.6553
Fermt3	68.1166	-0.251723	0.195032	10.6446	0.0588998	0.483112		56.1246	61.4867	83.0241	88.1705	100.049	51.1861	77.1614	41.7267	61.6783	97.5276	57.4565	63.1415	60.9236	49.3989	63.6468	80.0994	65.18
Selenom	29.5101	0.676675	0.268593	10.639	0.0590267	0.48373		21.0467	18.7134	24.2154	21.5528	20.6623	32.4835	20.4524	24.3406	59.5515	25.581	24.5035	32.3224	25.7512	34.3645	47.0812	45.7711	23.2786
Grb2	90.2788	0.0533771	0.174738	10.6261	0.0593192	0.485702		68.1513	70.8434	106.375	105.805	123.974	68.9044	82.7394	77.658	103.152	85.5365	65.906	83.437	79.1378	71.9506	119.447	116.971	104.754
Tapbpl	7.12359	-0.194737	0.477563	10.6054	0.0597909	0.489136		4.0089	4.01	9.51318	10.7764	10.8749	3.93739	1.85931	8.11352	15.9513	8.79347	6.75959	3.00674	4.39655	5.36945	7.84687	8.89994	6.98357
Arhgef3	8.45874	-0.728953	0.448541	10.5992	0.0599328	0.489623		4.0089	8.02001	16.4319	17.6341	10.8749	4.92174	3.71862	8.11352	15.9513	7.99406	10.1394	3.75842	6.28078	2.14778	10.4625	6.3571	6.98357
Cst7	1.55676	-0.485618	1.03945	10.5965	0.0599928	0.489623		1.00222	0	0	6.8577	4.34997	0.984348	1.85931	0	0	2.39822	0.844949	1.50337	1.88423	1.07389	0	2.54284	1.16393
Gpsm3	44.5143	-0.0500792	0.214916	10.5958	0.0600107	0.489623		43.0957	32.08	48.4307	50.9429	58.7246	32.4835	30.6786	30.1359	52.1075	55.9585	54.0767	48.1078	28.8916	45.1034	41.85	47.0425	57.0325
Hvcn1	34.8418	-0.527195	0.245744	10.5936	0.0600594	0.489623		59.1312	76.1901	38.0527	23.5121	30.4498	25.5931	30.6786	42.8857	27.6489	29.578	27.0384	35.3292	28.2635	36.5123	27.0281	24.157	30.2621
Blvrb	110.197	0.282032	0.230834	10.577	0.0604436	0.491899		144.32	139.013	87.3483	66.6177	54.3746	98.4348	104.121	187.77	110.596	97.5276	117.448	70.6583	81.6502	131.015	138.628	102.985	140.835
Cdca3	4.7145	-0.252896	0.72684	10.5782	0.0604146	0.491899		6.01335	5.34667	9.51318	4.89836	0	1.9687	3.71862	8.11352	3.19026	0	2.53485	15.0337	9.42117	2.14778	6.975	1.27142	0
Elovl1	44.9556	-0.280252	0.202434	10.5674	0.0606659	0.493279		63.1401	48.12	43.2417	46.0446	41.3247	56.1078	58.5683	40.5676	42.5368	31.1769	42.2474	49.6112	50.8743	42.9556	39.2344	25.4284	43.0653
Mbnl2	23.87	-0.167708	0.272916	10.565	0.0607205	0.493295		39.0868	34.7534	21.6209	22.5325	13.0499	16.7339	26.96	31.295	24.4586	17.5869	22.8136	23.3022	28.2635	31.1428	18.3094	15.257	18.6229
Pwp2	3.59785	-0.356518	0.713396	10.5584	0.0608731	0.494106		9.02002	5.34667	1.72967	2.93902	0	4.92174	4.64828	4.6363	1.06342	2.39822	4.22474	6.01348	5.6527	5.36945	0.871875	0	2.32786
Usf1	11.7085	0.00612135	0.422886	10.5544	0.0609661	0.494432		5.01112	4.01	19.8912	20.5731	7.61244	10.8278	7.43725	13.9089	14.8879	17.5869	17.7439	3.75842	11.3054	8.59112	14.8219	15.257	5.81964
Chaf1b	2.78492	-1.02928	0.750625	10.5429	0.0612343	0.496178		5.01112	5.34667	4.32417	2.93902	1.08749	4.92174	2.78897	2.31815	2.12684	0	0.844949	6.01348	2.51231	3.22167	2.61562	1.27142	0
Kif3c	3.7984	1.02421	0.707372	10.5342	0.0614386	0.497403		2.00445	2.67334	2.5945	0	5.43746	2.95304	2.78897	6.95444	5.3171	1.59881	5.06969	0	3.76847	4.29556	9.59062	2.54284	6.98357
Sema4d	60.1824	-0.039505	0.228206	10.5176	0.0618289	0.500131		39.0868	30.7434	58.8087	80.3331	79.3869	52.1705	57.6387	91.5668	73.3759	69.5484	65.906	42.846	33.2881	61.2117	54.9281	77.5566	54.7046
Ptger4	5.78443	-0.262008	0.50708	10.5013	0.0622148	0.502446		10.0222	8.02001	3.45934	6.8577	8.69993	0.984348	11.1559	4.6363	2.12684	4.79644	5.06969	3.00674	8.79309	3.22167	4.35937	3.81426	9.31143
Tmem94	5.52806	0.62926	0.54988	10.501	0.0622224	0.502446		1.00222	2.67334	6.05384	9.79672	3.26248	3.93739	0.929656	6.95444	9.57077	7.19466	5.91464	4.51011	3.76847	5.36945	9.59062	7.62852	5.81964
Nmt2	6.59398	-0.52137	0.547142	10.4963	0.0623346	0.502918		9.02002	12.03	6.91868	10.7764	0	9.84348	8.3669	6.95444	4.25368	8.79347	2.53485	8.26853	8.79309	5.36945	7.84687	0	2.32786
Gpr183	2.58104	-1.03126	0.844019	10.4683	0.0630028	0.507872		4.0089	9.35668	0.864834	0.979672	3.26248	2.95304	4.64828	1.15907	1.06342	0.799406	0.844949	6.01348	1.88423	4.29556	1.74375	0	0
Selenof	87.7468	-0.0410669	0.154691	10.4635	0.0631178	0.508362		93.2069	92.2301	110.699	89.1501	79.3869	87.607	83.669	81.1352	98.898	63.1531	57.4565	99.974	95.4679	98.7979	107.241	68.6567	84.9668
Il11ra1	13.3494	-0.888809	0.414903	10.4565	0.0632861	0.509279		44.0979	32.08	10.378	6.8577	10.8749	7.87479	8.3669	13.9089	6.38051	12.7905	8.44949	17.2887	10.6773	15.0345	6.10312	7.62852	8.1475
Cebpz	6.00613	-0.740339	0.53838	10.4524	0.0633859	0.509644		7.01557	10.6933	3.45934	5.87803	6.52495	11.8122	5.57794	5.79537	2.12684	7.19466	7.60454	5.26179	5.02462	9.66501	0	3.81426	4.65571
Dse	19.5643	-0.528129	0.287251	10.4439	0.063591	0.510262		20.0445	14.7033	29.4044	29.3902	45.6747	9.84348	13.0152	10.4317	18.0781	19.9852	16.054	11.2753	15.0739	17.1822	17.4375	22.8856	22.1146
Mphosph10	5.41192	0.29101	0.535571	10.4425	0.0636261	0.510262		6.01335	12.03	2.5945	2.93902	5.43746	0.984348	7.43725	5.79537	4.25368	3.99703	5.06969	2.25505	10.0492	5.36945	3.4875	3.81426	10.4754
Slc11a1	50.9591	-0.294487	0.290068	10.4461	0.0635387	0.510262		119.265	85.5467	31.134	35.2682	48.9371	38.3896	26.96	59.1128	35.0928	41.5691	55.7666	30.8191	40.197	82.6895	41.85	48.3139	45.3932
Mdm2	55.8958	0.991703	0.20408	10.4354	0.0637979	0.511202		41.0912	26.7334	29.4044	21.5528	35.8872	62.0139	105.051	68.3854	63.8051	67.1501	69.2858	54.1213	73.4851	46.1773	54.0562	61.0281	70.9996
Rps16	319.042	0.0978032	0.116699	10.4187	0.0642056	0.514029		327.727	390.307	294.044	291.942	279.485	311.054	309.575	304.836	283.933	289.385	262.779	402.151	352.98	391.97	382.753	282.255	266.54
Ucp2	196.393	-0.56108	0.145623	10.4142	0.0643149	0.514464		242.538	243.274	227.451	260.593	278.398	184.073	142.237	132.134	221.191	187.061	195.183	140.565	138.177	135.31	211.866	185.627	212.999
Etv3	33.5247	0.216038	0.264575	10.4083	0.0644595	0.515181		18.04	29.4067	19.8912	43.1056	42.4122	20.6713	51.1311	38.2494	35.0928	42.3685	33.7979	23.3022	37.0566	26.8473	26.1562	52.1282	30.2621
Grk5	1.99718	1.17241	1.04721	10.401	0.0646396	0.51618		0	1.33667	0.864834	0	2.17498	0.984348	2.78897	8.11352	2.12684	0	3.37979	3.00674	0.628078	2.14778	1.74375	0	4.65571
Klhl24	11.0057	0.202492	0.397417	10.3916	0.06487	0.517578		7.01557	1.33667	16.4319	13.7154	13.0499	6.89044	10.2262	10.4317	14.8879	15.9881	10.9843	11.2753	10.0492	4.29556	17.4375	11.4428	11.6393
Gpr108	20.501	-0.102989	0.302797	10.3874	0.0649741	0.517968		16.0356	14.7033	30.2692	23.5121	25.0123	17.7183	14.8745	16.227	22.3318	31.9763	10.9843	16.5371	13.8177	23.6256	20.0531	36.8712	13.9671
Dbndd2	14.1354	0.60586	0.3491	10.3679	0.0654584	0.521385		6.01335	9.35668	16.4319	15.6748	14.1374	10.8278	6.50759	13.9089	15.9513	13.5899	11.8293	8.26853	13.1896	11.8128	20.925	21.6141	30.2621
Gm10177	23.0213	0.0670502	0.274632	10.3608	0.0656354	0.522351		17.0378	29.4067	14.7022	21.5528	31.5373	23.6244	13.9448	27.8178	19.1415	23.9822	24.5035	22.5505	16.33	36.5123	18.3094	31.7855	18.6229
Cd300lf	27.5046	-0.154106	0.294742	10.3437	0.0660628	0.525083		20.0445	25.3967	24.2154	38.2072	38.0622	12.7965	24.1711	41.7267	38.2831	24.7816	31.2631	20.2955	11.3054	18.2561	36.6187	33.0569	29.0982
Dusp4	2.84804	-0.685969	0.770495	10.3426	0.0660909	0.525083		7.01557	9.35668	1.72967	0.979672	2.17498	0.984348	2.78897	3.47722	1.06342	0	1.6899	6.01348	3.14039	4.29556	0	2.54284	1.16393
Enpp1	2.93219	-1.11758	0.823249	10.3295	0.0664208	0.526052		11.0245	8.02001	1.72967	2.93902	1.08749	0.984348	0.929656	1.15907	3.19026	0.799406	0	8.26853	5.02462	2.14778	0	2.54284	0
Nhp2	19.3654	-0.320753	0.309787	10.3352	0.0662761	0.526052		35.0779	30.7434	18.1615	9.79672	17.3999	25.5931	25.1007	16.227	15.9513	15.9881	10.1394	18.7921	20.7266	24.6995	12.2062	13.9856	18.6229
Scpep1	84.042	-0.228878	0.173483	10.3288	0.0664374	0.526052		87.1935	72.1801	137.509	126.378	85.9118	66.9357	66.0056	47.522	72.3125	82.3389	76.0454	76.6718	87.9309	82.6895	91.5468	105.528	64.0161
Wdr5	10.1035	-0.717531	0.393467	10.3296	0.0664172	0.526052		13.0289	21.3867	7.78351	10.7764	15.2249	15.7496	8.3669	8.11352	4.25368	3.99703	7.60454	11.2753	8.79309	11.8128	6.975	3.81426	12.8032
Lgals3	2718.29	0.307949	0.130821	10.3195	0.0666713	0.526568		3126.94	3240.08	2322.95	2059.27	2221.75	1922.43	2031.3	2922.03	2510.73	2465.37	2579.63	3183.38	3141.02	3904.66	3178.85	2628.02	2772.48
Lpxn	69.3868	0.358046	0.187897	10.3209	0.0666369	0.526568		39.0868	48.12	70.0516	69.5567	78.2994	47.2487	64.1463	83.4533	87.2004	87.1353	67.5959	60.1348	69.0886	63.3595	77.5968	81.3709	86.1307
Thap3	5.78648	0.228085	0.570776	10.3225	0.066596	0.526568		2.00445	1.33667	2.5945	14.6951	10.8749	1.9687	1.85931	3.47722	8.50735	8.79347	8.44949	6.01348	3.76847	4.29556	8.71875	6.3571	4.65571
Rpl3-ps1	39.708	7.04351	0.921447	10.316	0.0667604	0.526781		0	1.33667	0	0	1.08749	65.9513	59.498	57.9537	46.7904	35.9733	42.2474	72.9134	63.4359	71.9506	75.8531	38.1426	41.9014
Sugp1	7.81396	-0.269736	0.492466	10.314	0.0668107	0.526781		4.0089	2.67334	6.05384	13.7154	11.9624	10.8278	3.71862	4.6363	10.6342	12.7905	10.1394	12.7786	2.51231	9.66501	3.4875	5.08568	8.1475
Cnih1	31.5129	-0.123756	0.274075	10.3096	0.0669238	0.527229		43.0957	48.12	26.8099	20.5731	20.6623	54.1392	19.5228	38.2494	28.7123	27.1798	27.0384	33.0741	42.0812	32.2167	30.5156	21.6141	22.1146
Cnot11	6.99951	0.333085	0.495184	10.305	0.0670404	0.527704		11.0245	5.34667	1.72967	7.83738	6.52495	4.92174	5.57794	6.95444	3.19026	7.99406	14.3641	3.00674	12.5616	6.44334	4.35937	10.1714	6.98357
Ass1	22.7866	0.752554	0.316762	10.2953	0.0672886	0.528789		9.02002	14.7033	13.8374	14.6951	13.0499	15.7496	27.8897	32.4541	52.1075	34.3745	37.1777	15.7854	15.0739	19.33	26.1562	34.3283	11.6393
Sipa1l2	3.59865	-0.509935	0.684613	10.2952	0.0672912	0.528789		10.0222	4.01	1.72967	2.93902	2.17498	4.92174	5.57794	4.6363	1.06342	0	3.37979	7.51684	3.76847	3.22167	2.61562	1.27142	2.32786
Ptpn1	36.284	-0.283552	0.216649	10.2923	0.0673653	0.528928		41.0912	42.7734	37.1879	54.8616	38.0622	33.4678	21.3821	24.3406	28.7123	48.7638	28.7283	43.5977	31.4039	31.1428	30.5156	47.0425	33.7539
Otud5	19.1714	-0.189088	0.297507	10.2844	0.0675677	0.529629		15.0334	12.03	25.0802	26.4511	27.1873	9.84348	13.9448	22.0224	18.0781	27.9792	23.6586	15.7854	13.1896	11.8128	17.4375	25.4284	20.9507
Slc25a13	8.3085	0.74366	0.463362	10.2858	0.0675311	0.529629		13.0289	1.33667	7.78351	2.93902	4.34997	7.87479	15.8041	6.95444	10.6342	7.19466	5.06969	12.7786	14.4458	8.59112	7.84687	7.62852	6.98357
Ahsa1	96.4946	-0.154478	0.168208	10.2658	0.0680457	0.53195		75.1668	130.993	91.6724	93.0688	114.187	90.56	90.1766	122.862	123.357	100.725	85.3398	64.6449	76.6255	99.8718	106.369	71.1995	103.59
Cdc42ep3	7.29226	0.173763	0.499255	10.2683	0.0679793	0.53195		2.00445	4.01	12.1077	8.81705	3.26248	14.7652	3.71862	6.95444	5.3171	8.79347	9.29444	9.02021	2.51231	7.51723	8.71875	10.1714	6.98357
Erf	7.65995	-1.01103	0.515856	10.2682	0.0679827	0.53195		5.01112	4.01	10.378	17.6341	6.52495	14.7652	9.29656	3.47722	5.3171	10.3923	12.6742	10.5236	1.25616	3.22167	6.10312	3.81426	5.81964
Laptm5	511.907	-0.00472995	0.112888	10.2618	0.0681477	0.53195		470.043	374.267	561.278	574.088	563.321	568.953	512.24	438.13	531.71	554.788	495.985	496.863	442.167	480.029	496.969	630.624	510.965
Zfp467	4.33558	-0.807956	0.679786	10.2626	0.0681273	0.53195		1.00222	2.67334	8.64834	15.6748	6.52495	2.95304	4.64828	0	3.19026	5.59585	1.6899	0	1.25616	2.14778	4.35937	6.3571	6.98357
Khnyn	4.79194	0.176399	0.617062	10.2558	0.0683023	0.532712		5.01112	1.33667	3.45934	2.93902	6.52495	1.9687	4.64828	4.6363	6.38051	9.59288	10.9843	2.25505	3.76847	0	6.10312	2.54284	9.31143
Atad2	4.94897	0.248764	0.640919	10.2496	0.0684654	0.532755		10.0222	4.01	4.32417	0.979672	2.17498	5.90609	5.57794	2.31815	7.44393	2.39822	4.22474	9.7719	7.53694	11.8128	4.35937	1.27142	0
C1qbp	24.5917	-0.240146	0.277409	10.2491	0.0684783	0.532755		40.089	33.4167	15.567	20.5731	18.4874	34.4522	35.3269	27.8178	19.1415	19.9852	24.5035	15.7854	24.495	31.1428	18.3094	20.3427	18.6229
Cct6a	42.3515	-0.207607	0.220691	10.2534	0.0683649	0.532755		60.1335	64.1601	31.9989	26.4511	33.7122	57.0922	48.3421	55.6356	38.2831	38.3715	39.7126	43.5977	40.197	37.5862	36.6187	34.3283	33.7539
Cbll1	5.07639	-0.199882	0.587297	10.2446	0.0685936	0.532767		2.00445	6.68334	2.5945	5.87803	11.9624	4.92174	1.85931	3.47722	6.38051	5.59585	5.06969	1.50337	1.88423	3.22167	2.61562	10.1714	10.4754
Myo5a	42.8129	-0.714881	0.210575	10.2447	0.068592	0.532767		77.1713	50.7934	66.5922	54.8616	43.4997	36.4209	45.5531	32.4541	27.6489	33.5751	29.5732	57.8797	43.9655	32.2167	29.6437	36.8712	29.0982
Mctp1	6.47887	-0.334451	0.488719	10.2388	0.0687458	0.533506		10.0222	14.7033	3.45934	5.87803	9.78743	2.95304	2.78897	8.11352	4.25368	5.59585	2.53485	3.75842	8.79309	15.0345	2.61562	6.3571	3.49178
Aars	28.5742	0.0627695	0.273196	10.2337	0.0688783	0.534092		40.089	30.7434	20.756	25.4715	18.4874	29.5304	33.4676	37.0904	22.3318	27.1798	26.1934	35.3292	47.1059	26.8473	23.5406	10.1714	31.4261
Aen	10.8127	-0.328498	0.403071	10.2259	0.0690806	0.535218		18.04	18.7134	3.45934	14.6951	7.61244	15.7496	13.9448	12.7498	6.38051	5.59585	7.60454	8.26853	13.8177	11.8128	6.10312	7.62852	11.6393
Ak6	16.8076	-0.129331	0.302915	10.2197	0.0692454	0.536051		24.0534	24.06	10.378	18.6138	20.6623	13.7809	19.5228	13.9089	9.57077	10.3923	9.29444	23.3022	24.495	24.6995	12.2062	13.9856	12.8032
Myd88	21.4535	-0.0769173	0.299871	10.2148	0.0693736	0.536304		16.0356	12.03	26.8099	35.2682	23.9248	21.6557	13.9448	18.5452	24.4586	19.1858	22.8136	14.282	13.8177	17.1822	16.5656	35.5998	32.59
Slc16a1	3.29378	-1.20732	0.848842	10.214	0.0693926	0.536304		12.0267	6.68334	0.864834	0	2.17498	4.92174	3.71862	5.79537	0	3.19763	4.22474	6.01348	1.88423	1.07389	0.871875	2.54284	0
Cap1	112.658	-0.267444	0.154612	10.2103	0.0694914	0.536625		152.338	176.44	112.428	102.866	132.674	95.4818	79.9504	101.999	99.9614	79.1412	94.6343	139.813	123.731	127.793	115.959	77.5566	102.426
Cd200r4	23.688	-0.0414741	0.274799	10.2071	0.0695764	0.536838		19.0423	9.35668	26.8099	38.2072	28.2748	20.6713	25.1007	16.227	30.8392	31.9763	25.3485	15.0337	23.867	19.33	25.2844	22.8856	24.4425
Hsd17b7	3.04058	-0.101427	0.758586	10.2009	0.0697396	0.537655		6.01335	8.02001	0.864834	2.93902	0	1.9687	3.71862	3.47722	4.25368	1.59881	0.844949	3.00674	6.90886	4.29556	2.61562	0	1.16393
Srgn	45.2112	-0.363238	0.22051	10.1971	0.0698384	0.537974		46.1023	42.7734	36.323	57.8006	61.987	60.0452	57.6387	34.7722	39.3465	45.5662	52.3868	30.0674	38.9408	32.2167	24.4125	54.671	53.5407
H3f3b	323.841	-0.0789885	0.168671	10.1825	0.0702258	0.540513		283.63	346.197	275.017	357.58	407.809	269.711	297.49	345.404	437.065	371.724	273.763	221.747	248.719	256.66	269.409	434.826	408.539
Tbc1d9	12.0231	-0.392239	0.438138	10.1759	0.0704007	0.541415		24.0534	8.02001	7.78351	7.83738	10.8749	14.7652	14.8745	12.7498	11.6976	17.5869	16.054	12.027	15.702	6.44334	0	7.62852	16.295
Efr3b	2.97129	-0.371822	0.753046	10.1704	0.0705488	0.542109		6.01335	6.68334	2.5945	0.979672	1.08749	1.9687	1.85931	6.95444	2.12684	1.59881	0.844949	4.51011	3.14039	6.44334	0	2.54284	1.16393
Dyrk1b	2.79219	0.251433	0.784734	10.1537	0.0709961	0.545099		2.00445	0	5.18901	4.89836	4.34997	0	1.85931	1.15907	5.3171	4.79644	0	0	2.51231	4.29556	2.61562	3.81426	4.65571
Cd14	42.3578	-0.913307	0.25614	10.1505	0.0710807	0.545301		56.1246	24.06	38.0527	65.638	101.137	41.3426	65.0759	37.0904	35.0928	40.7697	43.0924	29.3157	32.032	27.9211	22.6687	29.2427	31.4261
Acss2	3.7129	-0.192954	0.736008	10.1431	0.0712813	0.545946		1.00222	0	8.64834	7.83738	2.17498	1.9687	2.78897	8.11352	7.44393	2.39822	2.53485	0.751684	0.628078	2.14778	6.10312	5.08568	3.49178
Mier3	4.19959	0.443124	0.631205	10.1436	0.0712664	0.545946		2.00445	0	3.45934	5.87803	9.78743	2.95304	0.929656	3.47722	1.06342	7.19466	5.06969	2.25505	2.51231	3.22167	6.975	7.62852	6.98357
Gng2	44.1253	0.144619	0.233286	10.1387	0.0713984	0.546396		22.0489	21.3867	64.8626	55.8413	54.3746	43.3113	32.538	38.2494	44.6636	38.3715	52.3868	52.6179	43.3374	38.66	47.9531	48.3139	51.2128
H1f0	12.7378	-0.318798	0.365788	10.1316	0.0715914	0.547196		16.0356	5.34667	30.2692	18.6138	8.69993	8.85913	13.0152	5.79537	14.8879	14.3893	9.29444	14.282	14.4458	10.7389	14.8219	8.89994	8.1475
Stap1	27.6084	-0.184269	0.282203	10.1289	0.071663	0.547196		40.089	41.4367	9.51318	18.6138	33.7122	23.6244	33.4676	37.0904	24.4586	33.5751	35.4878	22.5505	23.867	30.0689	20.925	15.257	25.6064
Tmpo	9.2499	-0.115489	0.434813	10.1284	0.0716782	0.547196		11.0245	9.35668	12.9725	3.91869	7.61244	15.7496	9.29656	10.4317	6.38051	6.39525	6.75959	12.7786	16.33	13.9606	6.975	3.81426	3.49178
Aldh1l1	4.74826	-0.265236	0.665955	10.1089	0.072207	0.550531		0	2.67334	12.9725	6.8577	2.17498	2.95304	7.43725	8.11352	10.6342	3.99703	0.844949	5.26179	3.76847	3.22167	6.10312	2.54284	1.16393
Bcl3	7.02707	-0.015659	0.524972	10.1041	0.0723376	0.550531		5.01112	4.01	4.32417	7.83738	8.69993	3.93739	17.6635	8.11352	9.57077	7.19466	9.29444	2.25505	11.3054	0	4.35937	8.89994	6.98357
Emilin2	24.4362	0.72281	0.317835	10.1037	0.0723501	0.550531		19.0423	17.3767	7.78351	11.7561	11.9624	51.1861	21.3821	35.9313	36.1562	23.1828	31.2631	37.5842	33.9162	26.8473	17.4375	13.9856	18.6229
Rrp1b	1.64988	-0.777205	1.02519	10.1046	0.0723241	0.550531		3.00667	5.34667	0	0.979672	1.08749	3.93739	0.929656	2.31815	0	0	1.6899	3.75842	1.88423	1.07389	0.871875	0	1.16393
Ids	15.9387	-0.127382	0.33221	10.0877	0.072788	0.552516		8.0178	13.3667	24.2154	21.5528	11.9624	23.6244	16.7338	8.11352	18.0781	23.1828	13.5192	15.0337	15.0739	8.59112	19.1812	19.0713	11.6393
Rac2	120.523	0.10737	0.152381	10.0894	0.0727407	0.552516		108.24	76.1901	106.375	138.134	144.636	107.294	117.137	120.544	145.688	139.896	122.518	108.994	103.633	99.8718	125.55	139.856	144.327
Usb1	14.4033	0.26151	0.342035	10.0901	0.0727223	0.552516		10.0222	16.04	10.378	24.4918	9.78743	8.85913	11.1559	17.3861	17.0147	15.9881	8.44949	10.5236	10.0492	17.1822	12.2062	26.6998	18.6229
Atic	10.3478	-0.662525	0.415568	10.0808	0.0729776	0.552819		25.0556	17.3767	9.51318	6.8577	7.61244	18.7026	8.3669	6.95444	7.44393	6.39525	6.75959	11.2753	10.0492	11.8128	8.71875	2.54284	10.4754
Map3k1	9.16522	0.232484	0.426844	10.0798	0.0730049	0.552819		4.0089	4.01	10.378	17.6341	14.1374	4.92174	4.64828	6.95444	8.50735	5.59585	5.06969	12.027	5.6527	4.29556	14.8219	20.3427	12.8032
Sh3bgrl3	289.876	0.323969	0.10709	10.0812	0.072967	0.552819		266.592	283.374	273.288	236.101	200.098	289.398	290.982	324.541	321.153	290.185	269.539	315.707	329.113	329.684	360.084	287.341	260.72
Rnf7	34.9142	-0.306386	0.226572	10.0589	0.0735828	0.556745		45.1001	61.4867	37.1879	28.4105	32.6248	33.4678	37.1862	32.4541	38.2831	27.1798	20.2788	38.3359	37.6847	37.5862	36.6187	22.8856	26.7704
Cltb	15.2588	0.328197	0.361134	10.0426	0.0740366	0.559726		14.0311	18.7134	10.378	8.81705	11.9624	16.7339	22.3117	9.27259	3.19026	16.7875	19.4338	27.8123	19.4704	16.1084	7.84687	19.0713	17.4589
Rmdn3	10.5675	0.430974	0.447718	10.0399	0.0741116	0.559841		4.0089	9.35668	14.7022	13.7154	11.9624	3.93739	4.64828	2.31815	21.2684	12.7905	5.91464	8.26853	8.79309	12.8867	10.4625	10.1714	24.4425
Kmt5a	12.1606	0.232708	0.394559	10.0333	0.0742972	0.560711		10.0222	14.7033	5.18901	12.7357	7.61244	17.7183	21.3821	12.7498	11.6976	10.3923	4.22474	20.2955	16.33	15.0345	6.10312	8.89994	11.6393
Serpinb9	7.78591	0.693581	0.502443	10.0315	0.0743464	0.560711		7.01557	8.02001	0.864834	4.89836	5.43746	8.85913	2.78897	17.3861	6.38051	7.99406	13.5192	5.26179	6.90886	17.1822	5.23125	7.62852	6.98357
Hnrnpa3	86.1161	-0.394781	0.161206	10.0153	0.0748024	0.562908		120.267	135.003	98.5911	85.2315	101.137	66.9357	73.4428	96.2031	55.2978	71.1472	68.4408	87.9471	80.394	104.167	84.5718	57.2139	77.9832
Pink1	16.1502	0.479904	0.374587	10.0156	0.0747933	0.562908		18.04	8.02001	24.2154	14.6951	5.43746	13.7809	11.1559	4.6363	19.1415	23.9822	16.054	12.027	11.3054	13.9606	20.925	29.2427	27.9343
Samd8	11.8039	-0.274322	0.381433	10.0148	0.074818	0.562908		23.0512	12.03	12.1077	10.7764	5.43746	13.7809	19.5228	8.11352	10.6342	8.79347	9.29444	15.7854	15.702	10.7389	4.35937	8.89994	11.6393
Map7d1	49.0341	-0.295979	0.195441	10.0072	0.0750328	0.564071		59.1312	54.8034	41.5121	49.9633	46.7621	61.0296	63.2166	73.0217	44.6636	45.5662	39.7126	48.1078	50.2462	49.3989	38.3625	34.3283	33.7539
Nolc1	8.84828	-0.456902	0.438775	9.99691	0.0753228	0.565344		20.0445	17.3767	5.18901	3.91869	8.69993	12.7965	10.2262	6.95444	3.19026	4.79644	9.29444	8.26853	10.0492	9.66501	5.23125	8.89994	5.81964
Ubb-ps	11.7409	0.170868	0.42862	9.99774	0.0752993	0.565344		7.01557	16.04	7.78351	13.7154	9.78743	4.92174	8.3669	6.95444	20.205	20.7846	16.899	5.26179	9.42117	5.36945	20.925	6.3571	19.7868
Wwc2	5.24123	0.103341	0.622452	9.99457	0.0753893	0.56539		12.0267	5.34667	2.5945	1.95934	1.08749	10.8278	9.29656	6.95444	4.25368	0.799406	4.22474	4.51011	6.90886	5.36945	0.871875	5.08568	6.98357
St7l	3.79757	-0.451623	0.640948	9.98825	0.075569	0.565831		6.01335	5.34667	0.864834	10.7764	2.17498	3.93739	2.78897	4.6363	1.06342	5.59585	0.844949	3.00674	3.76847	2.14778	1.74375	6.3571	3.49178
Tent4a	6.08205	0.237854	0.513621	9.98962	0.07553	0.565831		2.00445	1.33667	9.51318	8.81705	7.61244	2.95304	2.78897	8.11352	7.44393	9.59288	6.75959	3.00674	3.76847	5.36945	6.10312	8.89994	9.31143
Cdkn1b	7.53553	-0.341105	0.515697	9.96556	0.076217	0.569356		4.0089	2.67334	10.378	15.6748	11.9624	3.93739	1.85931	3.47722	14.8879	15.1887	7.60454	9.02021	4.39655	5.36945	6.975	2.54284	8.1475
Itga4	12.1992	-1.30512	0.397533	9.96523	0.0762264	0.569356		10.0222	9.35668	39.7824	30.3698	25.0123	5.90609	3.71862	9.27259	6.38051	7.99406	9.29444	4.51011	5.6527	9.66501	13.0781	12.7142	4.65571
Ndufb6	36.1723	0.345395	0.238406	9.96326	0.0762829	0.569356		37.0823	40.1	20.756	24.4918	28.2748	41.3426	49.2718	41.7267	40.4099	26.3804	33.7979	38.3359	42.7093	47.2512	47.9531	17.7999	37.2457
Pcyox1	23.6854	0.703583	0.286997	9.96872	0.0761265	0.569356		7.01557	17.3767	25.0802	16.6544	21.7498	18.7026	24.1711	24.3406	41.4733	24.7816	19.4338	23.3022	23.867	20.4039	39.2344	31.7855	23.2786
Cdc20	2.34474	-0.430796	0.855697	9.96032	0.0763674	0.569533		4.0089	2.67334	2.5945	0.979672	1.08749	2.95304	3.71862	2.31815	1.06342	0.799406	0.844949	9.7719	1.88423	2.14778	1.74375	1.27142	0
Bcl6	12.5607	-0.209132	0.384637	9.95084	0.0766402	0.5704		18.04	21.3867	8.64834	11.7561	9.78743	16.7339	11.1559	8.11352	7.44393	9.59288	9.29444	15.0337	10.0492	30.0689	6.10312	6.3571	13.9671
Tfrc	78.2032	-0.301802	0.194635	9.95399	0.0765495	0.5704		138.307	149.707	87.3483	71.5161	72.8619	52.1705	60.4276	48.6811	52.1075	52.7608	46.4722	86.4437	89.1871	91.2807	108.112	53.3996	68.6718
Zfhx3	2.38658	-0.564673	0.88151	9.94994	0.0766663	0.5704		0	4.01	1.72967	5.87803	1.08749	3.93739	0	1.15907	3.19026	4.79644	4.22474	3.00674	0.628078	1.07389	0.871875	3.81426	1.16393
Lrrc27	4.90707	-2.0864	0.606098	9.94212	0.076892	0.571625		13.0289	17.3767	9.51318	9.79672	4.34997	3.93739	3.71862	0	1.06342	2.39822	0	3.75842	5.02462	4.29556	2.61562	2.54284	0
Cnot6l	15.282	-0.180527	0.350206	9.93727	0.0770323	0.572214		10.0222	9.35668	25.945	16.6544	17.3999	12.7965	12.0855	17.3861	19.1415	19.9852	17.7439	5.26179	6.90886	18.2561	12.2062	16.5285	22.1146
Rps27	85.7374	0.407516	0.188363	9.92554	0.0773727	0.573917		53.1179	61.4867	57.0791	94.0485	95.6993	99.4192	88.3173	88.0896	62.7417	114.315	80.2701	72.9134	77.2536	89.1329	92.4187	105.528	125.704
Taf5l	3.86539	0.483988	0.649687	9.92515	0.0773841	0.573917		4.0089	2.67334	1.72967	0.979672	6.52495	1.9687	4.64828	4.6363	5.3171	0.799406	9.29444	2.25505	3.76847	3.22167	4.35937	2.54284	6.98357
Dennd1b	12.2282	-0.19058	0.377503	9.90987	0.0778296	0.576764		7.01557	8.02001	15.567	20.5731	18.4874	5.90609	5.57794	15.068	20.205	11.9911	15.2091	6.76516	10.0492	10.7389	17.4375	7.62852	11.6393
Tra2b	24.4538	-0.62469	0.270058	9.90696	0.0779149	0.57694		40.089	36.09	27.6747	28.4105	16.3124	34.4522	31.6083	22.0224	21.2684	15.9881	17.7439	24.8056	21.3547	27.9211	14.8219	16.5285	18.6229
Trappc6a	20.0315	1.16438	0.335978	9.8896	0.0784244	0.580254		11.0245	12.03	21.6209	8.81705	3.26248	22.64	21.3821	25.4996	20.205	19.9852	18.5889	33.8258	26.3793	19.33	41.85	17.7999	16.295
Pebp1	56.6871	0.168059	0.201848	9.88322	0.0786127	0.581188		68.1513	70.8434	68.3219	34.2885	41.3247	43.3113	39.9752	67.2263	58.4881	51.162	51.5419	60.1348	66.5763	70.8767	75.8531	43.2283	52.3768
Bivm	3.63989	0.700692	0.723762	9.87797	0.0787678	0.581875		0	2.67334	5.18901	1.95934	4.34997	1.9687	1.85931	6.95444	2.12684	3.99703	1.6899	2.25505	0.628078	7.51723	6.10312	11.4428	1.16393
Tle3	8.55846	-0.127051	0.45673	9.85211	0.0795358	0.587086		12.0267	8.02001	10.378	4.89836	5.43746	13.7809	10.2262	1.15907	6.38051	7.99406	9.29444	20.2955	10.6773	7.51723	5.23125	6.3571	5.81964
Tmem221	5.69248	1.54548	0.608218	9.8478	0.0796645	0.587573		0	1.33667	2.5945	5.87803	3.26248	5.90609	1.85931	8.11352	9.57077	8.79347	7.60454	5.26179	3.14039	6.44334	7.84687	6.3571	12.8032
Klf7	2.38499	0.00751696	0.831745	9.84195	0.0798395	0.5884		2.00445	6.68334	1.72967	1.95934	1.08749	0	4.64828	4.6363	2.12684	0.799406	0.844949	0.751684	3.14039	5.36945	0	1.27142	3.49178
Srsf7	17.5006	-0.676126	0.310426	9.83686	0.0799918	0.589059		36.0801	40.1	19.0264	21.5528	11.9624	11.8122	18.5931	17.3861	11.6976	10.3923	9.29444	9.7719	14.4458	20.4039	18.3094	12.7142	13.9671
Abca1	37.2803	-0.825828	0.285053	9.82763	0.0802692	0.589249		57.1268	21.3867	63.9977	39.1869	58.7246	38.3896	38.1159	34.7722	35.0928	47.165	38.8676	11.2753	23.867	15.0345	29.6437	50.8568	30.2621
Galnt6	15.7882	-0.718148	0.312252	9.8305	0.0801829	0.589249		35.0779	17.3767	17.2967	18.6138	22.8373	14.7652	18.5931	9.27259	6.38051	8.79347	12.6742	21.0472	17.5862	13.9606	12.2062	11.4428	10.4754
Max	30.8366	-0.129159	0.256919	9.82906	0.0802263	0.589249		25.0556	32.08	40.6472	44.0852	31.5373	23.6244	15.8041	37.0904	37.2197	27.1798	32.108	13.5303	29.5197	26.8473	33.1312	44.4997	30.2621
Tlnrd1	12.4936	-0.552723	0.357215	9.82895	0.0802294	0.589249		19.0423	16.04	6.91868	18.6138	17.3999	14.7652	12.0855	8.11352	4.25368	16.7875	14.3641	9.02021	10.6773	13.9606	6.10312	11.4428	12.8032
Iqsec2	8.13996	-0.0847973	0.440694	9.81839	0.0805477	0.590368		3.00667	9.35668	6.05384	18.6138	10.8749	3.93739	5.57794	5.79537	9.57077	11.1917	5.91464	6.76516	3.76847	6.44334	9.59062	11.4428	10.4754
Triobp	11.4965	0.0429804	0.383775	9.8202	0.0804931	0.590368		7.01557	10.6933	12.1077	7.83738	18.4874	5.90609	6.50759	16.227	19.1415	11.9911	19.4338	6.01348	9.42117	7.51723	13.95	12.7142	10.4754
Rcc1	3.14108	-0.209432	0.747136	9.80876	0.0808388	0.592039		5.01112	8.02001	0	0.979672	4.34997	3.93739	3.71862	2.31815	2.12684	0.799406	3.37979	3.75842	5.6527	2.14778	0	2.54284	4.65571
Tank	14.4701	-0.261233	0.380331	9.80295	0.081015	0.592865		17.0378	9.35668	14.7022	13.7154	18.4874	12.7965	38.1159	11.5907	9.57077	13.5899	11.8293	9.7719	15.0739	8.59112	5.23125	19.0713	17.4589
Ostc	25.619	0.304451	0.270717	9.79452	0.0812714	0.594277		23.0512	30.7434	29.4044	14.6951	16.3124	24.6087	19.5228	37.0904	20.205	25.581	24.5035	21.7989	22.6108	49.3989	25.2844	21.6141	29.0982
Rsl1d1	17.5258	-0.306681	0.320007	9.79078	0.0813852	0.594645		28.0623	25.3967	8.64834	10.7764	20.6623	25.5931	25.1007	23.1815	13.8244	11.9911	14.3641	15.7854	16.9581	15.0345	14.8219	11.4428	16.295
Zfand5	44.6096	0.12644	0.230932	9.78709	0.0814977	0.594913		62.1379	58.8134	25.945	35.2682	41.3247	54.1392	57.6387	39.4085	28.7123	27.9792	34.6429	48.1078	57.7832	36.5123	45.3375	53.3996	51.2128
Zfp821	2.90014	-0.63031	0.833527	9.78541	0.0815489	0.594913		0	2.67334	6.05384	5.87803	3.26248	0	3.71862	0	6.38051	4.79644	4.22474	1.50337	0	1.07389	3.4875	5.08568	1.16393
Wdhd1	2.08301	-2.53042	1.01863	9.77922	0.0817381	0.59583		7.01557	8.02001	0.864834	0.979672	1.08749	4.92174	1.85931	1.15907	1.06342	1.59881	0.844949	3.75842	0	1.07389	0	0	1.16393
Mrtfb	10.6639	0.0860879	0.395588	9.77581	0.0818427	0.596128		15.0334	16.04	5.18901	8.81705	5.43746	15.7496	13.9448	12.7498	8.50735	8.79347	5.06969	12.027	15.0739	11.8128	5.23125	10.1714	11.6393
Slc7a1	5.42636	-1.18831	0.54064	9.76067	0.0823078	0.59905		15.0334	8.02001	6.05384	3.91869	10.8749	7.87479	4.64828	2.31815	2.12684	1.59881	2.53485	6.76516	8.79309	3.22167	3.4875	3.81426	1.16393
Ppp1r3b	4.81752	0.469386	0.658179	9.753	0.082544	0.600303		6.01335	6.68334	0.864834	3.91869	0	10.8278	9.29656	3.47722	5.3171	4.79644	0.844949	7.51684	6.28078	7.51723	2.61562	1.27142	4.65571
Afg3l2	13.897	-0.226501	0.340105	9.7448	0.0827978	0.600749		22.0489	20.05	12.1077	10.7764	8.69993	16.7339	16.7338	17.3861	12.761	7.99406	12.6742	13.5303	15.0739	21.4778	8.71875	10.1714	9.31143
Gng11	9.3218	0.237325	0.437025	9.74514	0.0827871	0.600749		16.0356	16.04	5.18901	9.79672	2.17498	6.89044	12.0855	6.95444	5.3171	7.99406	5.91464	9.02021	11.9335	17.1822	14.8219	7.62852	3.49178
Tmem37	17.7486	-0.298318	0.32284	9.74644	0.082747	0.600749		34.0756	9.35668	16.4319	20.5731	19.5749	20.6713	15.8041	9.27259	19.1415	22.3834	16.054	12.7786	15.0739	7.51723	19.1812	22.8856	20.9507
Cd200	4.41252	0.528699	0.625857	9.73627	0.0830623	0.601736		7.01557	8.02001	0.864834	3.91869	1.08749	1.9687	0.929656	6.95444	2.12684	4.79644	4.22474	2.25505	3.76847	13.9606	3.4875	3.81426	5.81964
Cdc42ep2	2.83555	0.738374	0.887193	9.73794	0.0830103	0.601736		0	0	0.864834	4.89836	3.26248	0.984348	9.29656	3.47722	2.12684	3.19763	3.37979	0	5.02462	3.22167	0	3.81426	4.65571
Atf5	33.4347	0.0112338	0.303996	9.72916	0.0832832	0.602473		58.129	32.08	26.8099	21.5528	32.6248	16.7339	18.5931	34.7722	26.5855	38.3715	63.3712	28.564	31.4039	32.2167	25.2844	25.4284	55.8686
Mapkapk3	13.3487	-0.21877	0.369505	9.72886	0.0832927	0.602473		8.0178	5.34667	15.567	19.5934	29.3623	16.7339	11.1559	8.11352	7.44393	11.9911	16.899	9.02021	13.8177	9.66501	13.0781	10.1714	20.9507
Ap1b1	36.5765	-0.102289	0.23027	9.71962	0.0835808	0.603319		37.0823	24.06	41.5121	45.0649	48.9371	38.3896	22.3117	28.9768	38.2831	47.9644	32.108	25.5573	31.4039	26.8473	44.4656	45.7711	43.0653
G3bp1	25.9962	-0.0875652	0.280149	9.7209	0.083541	0.603319		30.0667	46.7834	13.8374	24.4918	20.6623	24.6087	39.9752	27.8178	20.205	19.9852	25.3485	24.0539	27.0074	25.7734	17.4375	17.7999	36.0818
Natd1	7.10675	0.435482	0.500538	9.71891	0.0836029	0.603319		1.00222	4.01	7.78351	14.6951	7.61244	3.93739	6.50759	4.6363	4.25368	11.1917	5.91464	4.51011	5.6527	6.44334	16.5656	11.4428	4.65571
Atf7ip	6.28973	-0.0910983	0.522113	9.7132	0.0837817	0.603732		2.00445	1.33667	13.8374	10.7764	8.69993	2.95304	4.64828	2.31815	8.50735	6.39525	5.91464	11.2753	3.14039	4.29556	6.10312	8.89994	5.81964
Hras	16.5174	-0.0134183	0.329856	9.71296	0.083789	0.603732		22.0489	30.7434	10.378	15.6748	9.78743	14.7652	17.6635	19.7043	20.205	8.79347	9.29444	16.5371	19.4704	19.33	19.1812	19.0713	8.1475
Alcam	77.3973	0.623763	0.202919	9.70872	0.0839221	0.604226		75.1668	69.5067	71.7813	39.1869	42.4122	57.0922	84.5987	93.885	77.6296	87.9347	76.8903	96.2156	110.542	124.571	76.725	69.9281	61.6882
Inpp5k	11.9055	0.24832	0.39066	9.70403	0.0840692	0.60482		4.0089	6.68334	14.7022	13.7154	17.3999	5.90609	9.29656	12.7498	19.1415	10.3923	16.899	9.7719	11.9335	4.29556	17.4375	15.257	12.8032
Fzd7	6.20002	-0.360472	0.51268	9.69638	0.0843097	0.60562		9.02002	8.02001	3.45934	3.91869	8.69993	11.8122	8.3669	5.79537	3.19026	1.59881	5.06969	9.02021	5.02462	10.7389	4.35937	3.81426	3.49178
Hexb	54.688	0.0128844	0.18579	9.69685	0.084295	0.60562		62.1379	70.8434	76.1054	58.7803	45.6747	36.4209	37.1862	41.7267	52.1075	37.5721	36.3328	58.6314	69.0886	84.8373	68.0062	54.671	39.5736
Hmgn2	54.1407	-0.193793	0.184086	9.69069	0.0844891	0.606444		54.1201	64.1601	75.2406	49.9633	48.9371	62.9983	52.0607	44.0448	59.5515	47.165	38.8676	71.41	54.6428	47.2512	57.5437	47.0425	45.3932
Fkbp1a	44.4173	0.257587	0.200381	9.67323	0.0850417	0.609476		41.0912	61.4867	37.1879	35.2682	35.8872	49.2174	39.0455	44.0448	28.7123	29.578	38.8676	60.8864	51.5024	62.2856	39.2344	49.5854	51.2128
Rnf19b	24.2065	0.0778629	0.316646	9.67446	0.0850027	0.609476		20.0445	17.3767	13.8374	24.4918	31.5373	15.7496	57.6387	18.5452	32.966	21.584	30.4182	17.2887	23.867	17.1822	13.0781	27.9712	27.9343
Higd1a	19.1882	0.366665	0.314595	9.66853	0.0851911	0.61008		19.0423	26.7334	7.78351	12.7357	13.0499	18.7026	30.6786	20.8633	12.761	16.7875	31.2631	16.5371	18.8423	26.8473	14.8219	17.7999	20.9507
Rapgef1	10.4141	0.180114	0.407732	9.65284	0.0856912	0.612725		14.0311	13.3667	6.91868	5.87803	7.61244	9.84348	12.0855	16.227	6.38051	7.99406	5.06969	22.5505	14.4458	9.66501	6.975	6.3571	11.6393
Ugdh	14.5656	-0.403733	0.359904	9.65353	0.0856692	0.612725		22.0489	18.7134	12.9725	13.7154	14.1374	24.6087	8.3669	10.4317	20.205	7.19466	8.44949	18.7921	10.6773	19.33	20.925	8.89994	8.1475
Sirpa	368.794	-0.267255	0.118694	9.64598	0.0859106	0.613825		338.752	340.85	449.714	461.425	511.121	295.304	334.676	354.677	409.416	408.497	332.065	318.714	308.386	317.871	348.75	373.797	365.473
Mtap	5.80598	-0.610769	0.634853	9.63836	0.0861552	0.614653		5.01112	25.3967	2.5945	3.91869	5.43746	11.8122	4.64828	2.31815	2.12684	1.59881	0.844949	6.01348	1.25616	7.51723	3.4875	8.89994	5.81964
Ppil2	20.7887	-0.0394568	0.286305	9.63828	0.0861578	0.614653		17.0378	13.3667	23.3505	20.5731	29.3623	21.6557	15.8041	11.5907	26.5855	30.3774	27.0384	15.0337	16.33	16.1084	27.9	20.3427	20.9507
Engase	4.94266	0.527683	0.565349	9.63016	0.0864189	0.615813		1.00222	2.67334	10.378	6.8577	3.26248	0.984348	1.85931	5.79537	6.38051	7.99406	3.37979	3.75842	4.39655	6.44334	7.84687	6.3571	4.65571
Nop56	12.3229	-0.555659	0.421839	9.62825	0.0864805	0.615813		27.0601	21.3867	6.91868	4.89836	9.78743	16.7339	20.4524	6.95444	5.3171	15.9881	16.899	13.5303	11.9335	6.44334	6.975	8.89994	9.31143
Prc1	3.16685	-0.920607	0.765531	9.6271	0.0865176	0.615813		6.01335	9.35668	5.18901	0.979672	2.17498	0.984348	4.64828	3.47722	1.06342	3.19763	0	5.26179	5.6527	3.22167	2.61562	0	0
Scd2	9.14141	-1.60895	0.502275	9.62144	0.0867004	0.616325		23.0512	20.05	31.134	5.87803	9.78743	8.85913	6.50759	2.31815	2.12684	1.59881	3.37979	8.26853	9.42117	12.8867	2.61562	6.3571	1.16393
Vamp8	96.8604	0.233674	0.161192	9.6208	0.0867211	0.616325		93.2069	70.8434	75.2406	102.866	103.312	69.8887	111.559	86.9305	86.1369	123.109	116.603	103.732	92.9556	80.5418	103.753	111.885	114.065
Sdc1	7.66489	0.143471	0.544185	9.59586	0.0875305	0.621606		24.0534	6.68334	3.45934	1.95934	2.17498	8.85913	7.43725	10.4317	3.19026	7.99406	6.75959	12.7786	6.28078	11.8128	4.35937	5.08568	6.98357
Irf2bp2	50.1776	0.664222	0.249425	9.59194	0.0876585	0.622043		19.0423	16.04	44.1066	44.0852	58.7246	55.1235	64.1463	45.2039	64.8686	47.9644	65.906	43.5977	73.4851	37.5862	56.6719	55.9425	60.5243
Gm29216	270.848	0.887265	0.19983	9.58878	0.0877616	0.622303		143.318	167.083	236.965	139.113	129.412	249.04	218.469	275.86	551.915	407.697	388.676	261.586	346.071	279.211	299.925	209.784	300.294
Idh3a	8.41565	-0.282372	0.454983	9.57385	0.0882506	0.62494		14.0311	17.3767	6.91868	2.93902	4.34997	11.8122	11.1559	10.4317	6.38051	5.59585	8.44949	5.26179	10.0492	9.66501	4.35937	3.81426	10.4754
Wsb1	22.131	-0.632776	0.277394	9.57336	0.0882669	0.62494		34.0756	26.7334	29.4044	21.5528	25.0123	22.64	27.8897	22.0224	18.0781	10.3923	23.6586	27.0606	23.867	20.4039	12.2062	11.4428	19.7868
Ccni	40.9991	0.310762	0.217719	9.55158	0.0889851	0.62955		34.0756	24.06	52.7549	39.1869	44.5872	36.4209	37.1862	24.3406	32.966	46.3656	44.7823	33.0741	42.7093	39.7339	59.2875	49.5854	55.8686
Amd1	11.3377	-0.609972	0.368138	9.53711	0.0894652	0.632469		11.0245	26.7334	8.64834	15.6748	9.78743	11.8122	11.1559	15.068	7.44393	10.3923	8.44949	10.5236	7.53694	13.9606	6.10312	11.4428	6.98357
Pls3	10.5559	0.600716	0.443139	9.5335	0.0895854	0.63284		8.0178	10.6933	6.91868	6.8577	4.34997	21.6557	9.29656	16.227	9.57077	1.59881	10.1394	10.5236	16.9581	20.4039	10.4625	7.62852	8.1475
Timm10	10.1501	-0.626964	0.404597	9.53055	0.0896837	0.633057		21.0467	14.7033	6.05384	8.81705	9.78743	13.7809	13.0152	8.11352	8.50735	9.59288	7.60454	13.5303	10.0492	9.66501	2.61562	6.3571	9.31143
Rad54l	1.82469	-1.89228	1.03275	9.51401	0.0902365	0.63648		0	1.33667	5.18901	7.83738	2.17498	2.95304	0	2.31815	2.12684	1.59881	0	1.50337	0	1.07389	1.74375	0	1.16393
Dok2	7.95223	-0.0508456	0.457226	9.51081	0.090344	0.636758		13.0289	9.35668	5.18901	4.89836	5.43746	15.7496	8.3669	10.4317	5.3171	3.99703	5.06969	9.7719	12.5616	7.51723	6.10312	8.89994	3.49178
Map3k8	5.5446	-0.506415	0.514377	9.50832	0.0904276	0.636831		6.01335	4.01	10.378	5.87803	9.78743	3.93739	2.78897	1.15907	6.38051	4.79644	7.60454	5.26179	4.39655	1.07389	5.23125	5.08568	10.4754
Rb1	10.4341	0.0382834	0.412728	9.50645	0.0904903	0.636831		5.01112	6.68334	17.2967	8.81705	8.69993	14.7652	10.2262	5.79537	14.8879	15.9881	11.8293	6.76516	5.6527	8.59112	16.5656	13.9856	5.81964
Clcn5	4.64451	-0.0468459	0.639882	9.4924	0.0909636	0.639682		6.01335	1.33667	9.51318	1.95934	2.17498	7.87479	6.50759	5.79537	4.25368	2.39822	5.06969	3.75842	8.79309	5.36945	6.975	0	1.16393
Ptcd2	6.58332	0.259387	0.476883	9.48765	0.0911242	0.63986		2.00445	6.68334	6.05384	6.8577	10.8749	3.93739	4.64828	4.6363	4.25368	7.99406	10.1394	5.26179	3.14039	7.51723	6.10312	10.1714	11.6393
Rcan1	9.85425	-0.469394	0.483775	9.48761	0.0911256	0.63986		27.0601	21.3867	4.32417	8.81705	1.08749	6.89044	15.8041	9.27259	11.6976	10.3923	7.60454	4.51011	11.9335	5.36945	6.975	5.08568	9.31143
Gm28438	4.5703	-0.0412999	0.668042	9.47099	0.0916895	0.643337		4.0089	9.35668	5.18901	1.95934	1.08749	12.7965	5.57794	3.47722	2.12684	0	3.37979	5.26179	8.16502	6.44334	2.61562	5.08568	1.16393
Pde4b	2.28292	0.40755	1.05349	9.45564	0.092213	0.646526		0	0	3.45934	0.979672	2.17498	0.984348	11.1559	2.31815	4.25368	1.59881	0.844949	0	3.76847	0	2.61562	0	4.65571
Cox6c	115.117	0.0454142	0.147247	9.44676	0.0925175	0.647892		110.245	130.993	136.644	105.805	95.6993	113.2	129.222	128.657	107.405	92.7311	81.1151	125.531	115.566	139.606	135.141	95.3565	114.065
Tnfrsf1b	56.2834	-0.37003	0.213694	9.44592	0.0925461	0.647892		78.1735	50.7934	70.0516	70.5364	67.4245	37.4052	52.9904	60.2718	59.5515	55.159	52.3868	28.564	32.6601	48.3251	63.6468	78.828	50.0489
Psmb5	53.6497	-0.137803	0.208069	9.4369	0.0928562	0.649577		70.1557	85.5467	42.3769	36.2479	48.9371	52.1705	57.6387	57.9537	44.6636	51.9614	59.1464	51.1145	41.4532	67.6551	40.1062	43.2283	61.6882
Ergic3	46.8501	0.224317	0.240297	9.42909	0.0931253	0.650004		32.0712	25.3967	60.5384	54.8616	46.7621	37.4052	55.7794	44.0448	53.171	55.9585	29.5732	42.846	33.9162	39.7339	49.6969	78.828	55.8686
Lclat1	3.34948	-0.675614	0.707766	9.43134	0.0930479	0.650004		2.00445	2.67334	6.05384	5.87803	2.17498	4.92174	1.85931	0	6.38051	3.99703	5.06969	3.00674	1.25616	0	4.35937	3.81426	3.49178
Zwint	20.5858	0.246481	0.292727	9.4305	0.0930766	0.650004		30.0667	21.3867	11.2428	14.6951	17.3999	23.6244	30.6786	13.9089	14.8879	19.1858	15.2091	25.5573	25.1231	26.8473	14.8219	26.6998	18.6229
Ahnak	113.472	0.232446	0.209994	9.41471	0.0936229	0.650793		96.2135	52.13	170.372	127.357	91.3493	103.357	105.981	93.885	106.342	99.1264	120.828	164.619	158.904	99.8718	147.347	101.714	89.6225
Lamp1	520.237	0.013579	0.132511	9.41378	0.0936553	0.650793		486.079	391.644	729.92	666.177	538.308	400.63	395.104	420.744	474.285	510.021	503.589	575.039	564.642	518.689	596.362	615.367	457.424
Nomo1	7.9366	-0.448097	0.466681	9.41553	0.0935943	0.650793		10.0222	10.6933	7.78351	6.8577	9.78743	6.89044	9.29656	11.5907	6.38051	2.39822	9.29444	9.02021	13.1896	12.8867	5.23125	1.27142	2.32786
Pid1	13.9846	-0.992514	0.341914	9.41424	0.0936392	0.650793		22.0489	24.06	15.567	15.6748	17.3999	13.7809	15.8041	23.1815	13.8244	7.19466	8.44949	12.7786	10.6773	16.1084	7.84687	6.3571	6.98357
Sel1l	32.7188	0.166334	0.242214	9.41771	0.0935188	0.650793		29.0645	33.4167	45.8362	21.5528	25.0123	31.4991	34.3973	49.8402	27.6489	27.1798	25.3485	29.3157	38.3128	40.8078	44.4656	29.2427	23.2786
Tbrg1	25.7051	0.620746	0.269761	9.41963	0.0934525	0.650793		13.0289	16.04	20.756	23.5121	19.5749	20.6713	23.2414	25.4996	44.6636	31.1769	36.3328	19.5438	20.7266	26.8473	25.2844	30.5141	39.5736
Ccl3	37.741	0.0886478	0.351526	9.41042	0.0937719	0.651056		22.0489	10.6933	31.9989	61.7193	53.2871	24.6087	84.5987	46.363	15.9513	34.3745	38.0227	32.3224	47.1059	26.8473	24.4125	40.6854	46.5571
Map4k3	15.0956	-0.385559	0.340406	9.40868	0.0938321	0.651056		30.0667	20.05	6.91868	18.6138	18.4874	10.8278	14.8745	17.3861	7.44393	15.9881	14.3641	13.5303	18.2143	21.4778	11.3344	8.89994	8.1475
Pprc1	5.83	0.0972959	0.540368	9.40131	0.0940887	0.652353		14.0311	5.34667	2.5945	4.89836	3.26248	3.93739	12.0855	4.6363	4.25368	4.79644	2.53485	9.02021	8.16502	7.51723	6.10312	1.27142	4.65571
Cebpd	5.95422	0.420862	0.654793	9.38848	0.0945369	0.654976		5.01112	1.33667	6.91868	2.93902	0	20.6713	9.29656	3.47722	3.19026	1.59881	10.9843	9.7719	3.76847	6.44334	5.23125	1.27142	9.31143
Casp3	7.7199	0.846847	0.49763	9.36053	0.0955196	0.660807		2.00445	4.01	8.64834	7.83738	9.78743	3.93739	3.71862	1.15907	17.0147	5.59585	8.44949	4.51011	7.53694	13.9606	12.2062	12.7142	8.1475
Gtpbp2	15.1803	0.287148	0.34489	9.36098	0.0955036	0.660807		8.0178	9.35668	14.7022	20.5731	16.3124	4.92174	17.6635	16.227	24.4586	14.3893	22.8136	9.02021	12.5616	19.33	17.4375	13.9856	16.295
Stk10	10.7991	0.116731	0.421718	9.3538	0.0957575	0.661964		17.0378	10.6933	3.45934	4.89836	10.8749	14.7652	19.5228	9.27259	8.50735	14.3893	9.29444	9.02021	14.4458	4.29556	6.10312	16.5285	10.4754
Fam111a	20.7534	-0.524756	0.313206	9.34739	0.0959848	0.662411		35.0779	30.7434	10.378	17.6341	22.8373	31.4991	16.7338	25.4996	14.8879	19.9852	27.0384	15.0337	12.5616	24.6995	12.2062	12.7142	23.2786
Inpp5d	40.2642	-0.194188	0.219209	9.34745	0.0959827	0.662411		49.109	40.1	43.2417	42.1259	34.7997	50.2018	50.2014	22.0224	34.0294	39.1709	43.9373	50.3629	44.5935	26.8473	30.5156	48.3139	34.9178
Ube2d3	115.098	-0.0151923	0.152617	9.34599	0.0960344	0.662411		151.336	130.993	84.7538	91.1095	123.974	115.169	131.081	113.589	113.786	87.1353	128.432	115.759	112.426	118.128	110.728	97.8993	130.36
Tpp2	12.0707	-0.131657	0.379628	9.33333	0.0964848	0.665028		17.0378	5.34667	14.7022	15.6748	6.52495	13.7809	21.3821	13.9089	8.50735	10.3923	8.44949	15.7854	17.5862	11.8128	9.59062	8.89994	5.81964
Acot4	1.97797	-1.50085	0.976507	9.32863	0.0966526	0.665695		0	0	4.32417	7.83738	6.52495	0.984348	1.85931	0	2.12684	1.59881	2.53485	0	1.25616	0	0.871875	2.54284	1.16393
Rhobtb1	2.05	-0.403076	1.01667	9.31958	0.0969763	0.667434		0	0	10.378	2.93902	1.08749	1.9687	0	1.15907	3.19026	4.79644	0.844949	0.751684	1.88423	0	0.871875	3.81426	1.16393
Ipo5	35.9639	-0.127394	0.241244	9.31686	0.0970739	0.667615		60.1335	37.4267	29.4044	39.1869	35.8872	34.4522	25.1007	46.363	23.3952	27.9792	21.9687	41.3426	47.1059	53.6945	35.7469	25.4284	26.7704
Clec2d	34.8765	0.499905	0.294481	9.30417	0.0975297	0.670257		20.0445	32.08	14.7022	23.5121	57.6371	23.6244	27.8897	48.6811	40.4099	39.9703	33.7979	34.5775	27.0074	42.9556	53.1844	21.6141	51.2128
Trem2	524.229	0.243667	0.114795	9.29895	0.0977179	0.671059		513.139	415.704	533.603	481.999	461.096	457.722	446.235	522.742	557.232	604.351	552.596	489.347	451.588	509.024	650.418	645.881	619.21
Mindy1	25.9228	-0.264327	0.266091	9.29691	0.0977917	0.671073		50.1112	24.06	25.0802	25.4715	27.1873	20.6713	27.8897	13.9089	15.9513	25.581	29.5732	34.5775	32.032	24.6995	16.5656	22.8856	24.4425
Stxbp3	15.0044	0.0271742	0.350136	9.29356	0.0979126	0.671411		9.02002	6.68334	19.0264	24.4918	17.3999	15.7496	7.43725	15.068	21.2684	11.9911	17.7439	8.26853	11.9335	10.7389	19.1812	21.6141	17.4589
Ext2	11.6465	0.59004	0.387186	9.2734	0.0986435	0.675928		5.01112	6.68334	6.91868	16.6544	11.9624	5.90609	11.1559	12.7498	14.8879	19.1858	12.6742	7.51684	14.4458	6.44334	13.0781	15.257	17.4589
Atp6v1g1	129.347	-0.0374303	0.148323	9.26407	0.0989838	0.675937		156.347	129.657	119.347	126.378	125.062	145.684	131.081	125.18	97.8346	113.516	136.037	145.827	170.209	152.492	116.831	99.1707	108.245
Fastkd1	1.65962	1.10133	1.07266	9.27133	0.0987189	0.675937		3.00667	0	0	0	2.17498	2.95304	4.64828	1.15907	1.06342	0	0.844949	1.50337	3.76847	2.14778	2.61562	0	2.32786
Gm42427	5.3236	-0.735562	0.560571	9.26799	0.0988408	0.675937		8.0178	6.68334	13.8374	1.95934	3.26248	4.92174	4.64828	6.95444	7.44393	3.99703	2.53485	7.51684	3.14039	7.51723	4.35937	2.54284	1.16393
Igsf6	17.033	-0.382369	0.334358	9.26402	0.0989855	0.675937		16.0356	16.04	16.4319	30.3698	23.9248	8.85913	14.8745	23.1815	20.205	14.3893	14.3641	8.26853	9.42117	16.1084	11.3344	31.7855	13.9671
Wfdc17	90.4305	-0.389752	0.199637	9.26347	0.0990057	0.675937		116.258	66.8334	140.103	132.256	64.162	92.5287	118.066	106.635	76.5662	93.5306	58.3015	83.437	72.8571	77.3201	81.9562	88.9994	67.5078
Mcm3	6.36449	-1.01984	0.507728	9.25904	0.0991674	0.676549		15.0334	18.7134	4.32417	5.87803	3.26248	8.85913	5.57794	6.95444	3.19026	3.99703	4.22474	6.76516	5.6527	5.36945	4.35937	2.54284	3.49178
Dusp28	3.39481	-0.387176	0.672073	9.24785	0.0995774	0.678851		2.00445	1.33667	4.32417	8.81705	4.34997	1.9687	0.929656	2.31815	6.38051	4.79644	3.37979	1.50337	1.88423	1.07389	5.23125	5.08568	2.32786
Itgb7	12.408	1.38949	0.454357	9.22771	0.100319	0.683289		1.00222	2.67334	15.567	7.83738	8.69993	3.93739	8.3669	10.4317	17.0147	17.5869	27.0384	15.0337	14.4458	15.0345	14.8219	13.9856	17.4589
Tmem199	8.60706	-0.434784	0.493673	9.22622	0.100374	0.683289		13.0289	10.6933	5.18901	4.89836	10.8749	11.8122	17.6635	4.6363	3.19026	9.59288	9.29444	15.7854	6.90886	9.66501	6.10312	0	6.98357
Arhgap30	38.7929	-0.709127	0.235644	9.21459	0.100805	0.685357		35.0779	37.4267	33.7285	76.4144	67.4245	35.4365	31.6083	34.7722	46.7904	40.7697	43.0924	27.8123	20.0985	27.9211	33.1312	33.0569	34.9178
Fmnl3	9.59278	0.185748	0.417826	9.2121	0.100897	0.685357		21.0467	12.03	2.5945	7.83738	6.52495	6.89044	11.1559	9.27259	6.38051	6.39525	8.44949	14.282	15.0739	11.8128	8.71875	7.62852	6.98357
Sfr1	19.7498	-0.310937	0.288737	9.21297	0.100865	0.685357		30.0667	21.3867	24.2154	23.5121	16.3124	11.8122	29.749	10.4317	22.3318	19.1858	21.9687	12.7786	25.7512	15.0345	17.4375	13.9856	19.7868
Il2rg	24.8537	-0.425447	0.358476	9.20533	0.101149	0.686569		13.0289	6.68334	34.5934	51.9226	53.2871	17.7183	13.0152	24.3406	36.1562	28.7786	22.8136	15.0337	18.2143	24.6995	13.95	20.3427	27.9343
Abcd1	23.2952	-0.155111	0.264562	9.19526	0.101525	0.688618		17.0378	21.3867	26.8099	33.3088	36.9747	17.7183	11.1559	19.7043	28.7123	19.9852	24.5035	18.0404	18.2143	22.5517	28.7719	26.6998	24.4425
Slc26a11	11.6732	-0.0244381	0.402477	9.18387	0.101951	0.691012		10.0222	2.67334	24.2154	11.7561	16.3124	7.87479	13.0152	4.6363	8.50735	10.3923	11.8293	19.5438	18.8423	6.44334	10.4625	11.4428	10.4754
Gm14548	4.86668	1.16568	0.601205	9.17469	0.102296	0.692345		2.00445	1.33667	1.72967	5.87803	5.43746	3.93739	1.85931	1.15907	3.19026	6.39525	9.29444	6.76516	7.53694	4.29556	3.4875	11.4428	6.98357
Hexa	305.634	-0.0284672	0.154806	9.17499	0.102285	0.692345		308.685	208.52	484.307	391.869	326.248	216.557	237.062	223.701	230.762	315.766	304.182	318.714	293.312	309.28	348.75	338.198	339.867
6330403L08Rik	1.88994	-1.93317	0.955927	9.16651	0.102604	0.692444		7.01557	6.68334	0.864834	0.979672	2.17498	2.95304	1.85931	1.15907	1.06342	0	0.844949	2.25505	1.25616	2.14778	0.871875	0	0
Bmf	1.8021	1.0074	0.987625	9.16645	0.102606	0.692444		0	0	1.72967	0.979672	4.34997	0.984348	0	1.15907	4.25368	0.799406	2.53485	1.50337	1.25616	0	2.61562	3.81426	4.65571
Pgm3	2.18634	-0.320699	0.924271	9.1712	0.102427	0.692444		2.00445	2.67334	5.18901	0	0	2.95304	2.78897	4.6363	4.25368	0.799406	2.53485	1.50337	0.628078	4.29556	1.74375	0	1.16393
Taf1d	5.97877	-0.226555	0.565058	9.16789	0.102552	0.692444		12.0267	4.01	3.45934	0.979672	11.9624	6.89044	11.1559	4.6363	6.38051	3.99703	4.22474	3.75842	12.5616	4.29556	2.61562	6.3571	2.32786
Cdk20	5.1882	0.0609206	0.580974	9.14639	0.103366	0.697068		1.00222	5.34667	5.18901	2.93902	6.52495	9.84348	2.78897	5.79537	8.50735	5.59585	5.06969	8.26853	1.88423	2.14778	8.71875	5.08568	3.49178
Spire1	7.86533	-0.0354678	0.480075	9.13608	0.103758	0.699208		17.0378	8.02001	2.5945	6.8577	8.69993	9.84348	8.3669	6.95444	4.25368	0	9.29444	10.5236	11.3054	6.44334	7.84687	6.3571	9.31143
Rrp12	2.76669	0.653353	0.79316	9.12775	0.104076	0.700848		5.01112	5.34667	0	1.95934	0	2.95304	2.78897	2.31815	1.06342	3.19763	1.6899	3.75842	6.90886	4.29556	0.871875	2.54284	2.32786
Gng12	25.5986	-0.300221	0.25205	9.12091	0.104338	0.702105		46.1023	32.08	23.3505	33.3088	19.5749	23.6244	28.8193	19.7043	18.0781	19.9852	18.5889	29.3157	35.1724	19.33	24.4125	21.6141	22.1146
Phyh	15.5233	-0.0285667	0.324485	9.1121	0.104676	0.703874		17.0378	13.3667	17.2967	28.4105	14.1374	8.85913	9.29656	6.95444	20.205	15.9881	11.8293	12.027	16.33	8.59112	20.0531	19.0713	24.4425
AC159819.1	10.104	0.572417	0.418098	9.10684	0.104878	0.704728		12.0267	8.02001	6.05384	3.91869	7.61244	11.8122	20.4524	5.79537	5.3171	11.9911	10.9843	12.027	16.9581	8.59112	8.71875	6.3571	15.1311
Glrx	53.3914	-0.109927	0.22006	9.10081	0.10511	0.705277		78.1735	66.8334	29.4044	41.1462	47.8496	60.0452	80.8801	68.3854	60.6149	45.5662	46.4722	42.846	48.362	49.3989	45.3375	38.1426	58.1964
Map6	4.9826	1.24541	0.607699	9.10094	0.105105	0.705277		6.01335	4.01	0.864834	3.91869	1.08749	1.9687	9.29656	5.79537	4.25368	5.59585	3.37979	1.50337	5.6527	9.66501	3.4875	8.89994	9.31143
Lrrc8b	3.93673	-0.532295	0.710267	9.08816	0.105599	0.705734		4.0089	5.34667	3.45934	0.979672	5.43746	8.85913	10.2262	3.47722	0	2.39822	4.22474	3.00674	7.53694	2.14778	3.4875	0	2.32786
Mtpn	94.4331	0.116556	0.157997	9.08735	0.10563	0.705734		119.265	102.923	89.9428	68.577	82.6494	74.8105	104.121	111.271	90.3906	91.9317	85.3398	91.7055	106.773	110.611	103.753	71.1995	100.098
Naga	27.9487	0.389461	0.279089	9.08768	0.105618	0.705734		15.0334	10.6933	33.7285	30.3698	35.8872	18.7026	36.2566	22.0224	25.5221	34.3745	28.7283	24.8056	27.6354	23.6256	42.7219	39.414	25.6064
Nt5dc2	26.0945	0.0854777	0.318181	9.09474	0.105344	0.705734		31.069	22.7234	33.7285	21.5528	11.9624	49.2174	34.3973	18.5452	24.4586	15.1887	14.3641	30.0674	20.0985	34.3645	22.6687	39.414	19.7868
Pbk	2.01379	-0.102689	0.910693	9.08914	0.105561	0.705734		1.00222	4.01	2.5945	2.93902	0	3.93739	1.85931	1.15907	2.12684	0.799406	0	2.25505	3.76847	4.29556	3.4875	0	0
Psme3ip1	12.8048	-0.212332	0.352004	9.09364	0.105387	0.705734		12.0267	12.03	12.9725	12.7357	17.3999	9.84348	12.0855	6.95444	15.9513	13.5899	24.5035	9.7719	10.6773	7.51723	12.2062	7.62852	19.7868
Pcbd2	14.5729	0.537056	0.345126	9.08254	0.105817	0.706477		9.02002	10.6933	10.378	7.83738	17.3999	13.7809	12.0855	15.068	12.761	23.1828	23.6586	8.26853	11.3054	16.1084	13.95	17.7999	24.4425
Sntb2	5.64723	0.239569	0.538744	9.07079	0.106274	0.709021		3.00667	2.67334	4.32417	5.87803	9.78743	0.984348	4.64828	6.95444	8.50735	10.3923	9.29444	2.25505	6.28078	4.29556	3.4875	5.08568	8.1475
Add3	3.46721	0.728559	0.778062	9.05659	0.106828	0.712167		3.00667	5.34667	0.864834	0.979672	0	8.85913	3.71862	5.79537	5.3171	0.799406	3.37979	4.51011	5.6527	5.36945	1.74375	1.27142	2.32786
Slc39a8	5.54059	0.0382964	0.576736	9.05466	0.106904	0.712167		6.01335	2.67334	1.72967	5.87803	3.26248	10.8278	12.0855	8.11352	3.19026	4.79644	6.75959	9.7719	5.6527	3.22167	1.74375	3.81426	4.65571
Stt3a	33.1336	-0.312389	0.256538	9.05288	0.106973	0.712167		34.0756	53.4667	35.4582	25.4715	27.1873	30.5148	36.2566	41.7267	37.2197	23.1828	43.9373	42.846	27.6354	40.8078	24.4125	21.6141	17.4589
Stx5a	14.6582	-0.00682619	0.360802	9.0461	0.107239	0.713432		4.0089	14.7033	19.8912	17.6341	16.3124	11.8122	13.9448	8.11352	27.6489	18.3863	19.4338	6.76516	13.1896	11.8128	14.8219	19.0713	11.6393
Pip4p1	25.3541	-0.239368	0.263672	9.03777	0.107567	0.714597		18.04	22.7234	38.0527	28.4105	31.5373	25.5931	13.0152	24.3406	27.6489	31.1769	30.4182	21.0472	15.702	31.1428	24.4125	27.9712	19.7868
Tubb2b	2.46543	0.230065	0.846976	9.03847	0.107539	0.714597		1.00222	6.68334	0	4.89836	1.08749	2.95304	0.929656	4.6363	0	3.19763	0.844949	4.51011	3.76847	3.22167	1.74375	1.27142	1.16393
Pik3r6	2.67204	-0.350143	0.974682	9.03117	0.107827	0.715817		0	0	6.05384	5.87803	0	2.95304	4.64828	3.47722	7.44393	2.39822	0.844949	5.26179	0.628078	3.22167	2.61562	0	0
Ier3	5.02118	-0.607434	0.61343	9.02778	0.107961	0.716198		7.01557	2.67334	4.32417	2.93902	5.43746	7.87479	13.9448	3.47722	3.19026	6.39525	9.29444	2.25505	4.39655	0	2.61562	2.54284	6.98357
Ralb	23.8211	-0.234268	0.274519	9.00652	0.108804	0.720263		20.0445	34.7534	17.2967	21.5528	29.3623	25.5931	27.8897	32.4541	23.3952	21.584	24.5035	19.5438	14.4458	33.2906	17.4375	12.7142	29.0982
Sptssa	38.6984	-0.364751	0.23043	9.00716	0.108779	0.720263		46.1023	49.4567	61.4032	35.2682	35.8872	46.2644	41.8345	41.7267	26.5855	22.3834	32.108	34.5775	48.9901	34.3645	45.3375	24.157	31.4261
Srsf6	25.0416	-0.267068	0.2652	9.00776	0.108755	0.720263		32.0712	40.1	23.3505	16.6544	23.9248	26.5774	33.4676	24.3406	24.4586	20.7846	19.4338	31.5707	29.5197	25.7734	14.8219	19.0713	19.7868
Daglb	22.7471	-0.141187	0.290831	9.00124	0.109015	0.721145		29.0645	18.7134	30.2692	24.4918	29.3623	17.7183	11.1559	10.4317	17.0147	27.9792	27.0384	17.2887	23.2389	15.0345	26.1562	41.9568	19.7868
Cenpx	22.9393	0.113237	0.277159	8.99903	0.109103	0.721218		21.0467	46.7834	24.2154	18.6138	16.3124	19.687	20.4524	24.3406	10.6342	15.9881	16.054	18.7921	30.1477	34.3645	26.1562	25.4284	20.9507
Clstn1	8.49795	0.137415	0.475717	8.99278	0.109353	0.72209		17.0378	14.7033	6.91868	1.95934	3.26248	8.85913	9.29656	4.6363	10.6342	7.99406	2.53485	13.5303	11.3054	7.51723	12.2062	5.08568	6.98357
Ctsa	330.804	0.165516	0.109561	8.99128	0.109412	0.72209		307.683	284.71	381.392	363.458	301.235	248.056	276.108	294.405	348.801	356.535	313.476	346.527	342.931	358.679	374.034	391.597	334.047
Ubr4	23.2753	0.214769	0.2939	8.98994	0.109466	0.72209		16.0356	14.7033	23.3505	23.5121	23.9248	12.7965	26.96	35.9313	29.7757	18.3863	39.7126	15.0337	19.4704	23.6256	34.875	17.7999	19.7868
S100a11	73.8516	0.245672	0.174749	8.98793	0.109547	0.722113		66.1468	86.8834	87.3483	54.8616	43.4997	67.92	68.7945	75.3398	91.454	73.5454	71.8206	72.1617	73.4851	75.1723	101.137	73.7423	72.1636
Rabif	5.90717	-0.0194963	0.554106	8.98101	0.109824	0.723432		3.00667	8.02001	3.45934	2.93902	7.61244	10.8278	1.85931	5.79537	7.44393	7.19466	8.44949	9.02021	1.25616	5.36945	9.59062	5.08568	3.49178
Acad12	4.93977	1.71733	0.676014	8.97113	0.110221	0.723531		4.0089	0	0.864834	3.91869	3.26248	0.984348	3.71862	6.95444	0	14.3893	5.91464	6.01348	6.28078	6.44334	5.23125	10.1714	5.81964
Apobec3	8.35631	-1.02007	0.456014	8.96337	0.110534	0.723531		4.0089	8.02001	13.8374	20.5731	21.7498	1.9687	5.57794	6.95444	7.44393	8.79347	8.44949	5.26179	3.14039	4.29556	9.59062	8.89994	3.49178
Fgfr1	3.92847	-0.224599	0.70623	8.9678	0.110355	0.723531		9.02002	12.03	1.72967	0	1.08749	3.93739	2.78897	5.79537	4.25368	1.59881	4.22474	2.25505	3.76847	4.29556	1.74375	1.27142	6.98357
Osbpl11	14.1594	0.103476	0.35568	8.96505	0.110466	0.723531		10.0222	4.01	19.0264	28.4105	18.4874	6.89044	13.0152	10.4317	13.8244	16.7875	8.44949	11.2753	14.4458	11.8128	23.5406	13.9856	16.295
Psd3	2.26638	-0.942047	0.897507	8.97044	0.110249	0.723531		5.01112	4.01	4.32417	0.979672	0	3.93739	1.85931	2.31815	4.25368	0.799406	1.6899	1.50337	5.02462	1.07389	1.74375	0	0
Slc25a45	13.1315	-0.271241	0.339235	8.97587	0.11003	0.723531		12.0267	12.03	17.2967	17.6341	18.4874	7.87479	9.29656	8.11352	14.8879	16.7875	13.5192	9.02021	7.53694	9.66501	12.2062	22.8856	13.9671
Tmod3	23.0565	0.0223362	0.28301	8.96396	0.11051	0.723531		14.0311	13.3667	27.6747	20.5731	34.7997	28.5461	22.3117	16.227	28.7123	27.1798	27.0384	15.0337	17.5862	17.1822	24.4125	30.5141	26.7704
Zfp260	3.75824	-0.0523555	0.679479	8.97219	0.110179	0.723531		1.00222	4.01	2.5945	3.91869	5.43746	1.9687	2.78897	3.47722	8.50735	7.19466	5.06969	0.751684	0.628078	4.29556	6.10312	3.81426	2.32786
Zfp738	1.7752	0.493	0.937943	8.97065	0.11024	0.723531		4.0089	2.67334	0	0.979672	2.17498	0.984348	2.78897	0	0	0.799406	1.6899	0	5.02462	2.14778	0.871875	2.54284	3.49178
Btbd10	5.19923	-0.26259	0.579913	8.95872	0.110722	0.724256		6.01335	10.6933	2.5945	0.979672	5.43746	10.8278	6.50759	5.79537	3.19026	4.79644	4.22474	6.01348	8.16502	5.36945	1.74375	2.54284	3.49178
2300009A05Rik	9.94059	0.439735	0.408107	8.94514	0.111272	0.726911		8.0178	1.33667	8.64834	7.83738	15.2249	10.8278	6.50759	6.95444	10.6342	13.5899	14.3641	9.7719	8.79309	7.51723	11.3344	10.1714	17.4589
Aldh3a2	10.767	0.304655	0.405418	8.94487	0.111283	0.726911		10.0222	5.34667	13.8374	4.89836	11.9624	13.7809	6.50759	9.27259	14.8879	8.79347	14.3641	6.76516	8.16502	5.36945	16.5656	12.7142	19.7868
Gm42517	7.01798	-0.687813	0.528047	8.94081	0.111449	0.727484		4.0089	2.67334	18.1615	19.5934	7.61244	1.9687	6.50759	6.95444	6.38051	3.99703	9.29444	1.50337	5.02462	4.29556	5.23125	11.4428	4.65571
Cdc42ep4	6.35662	0.260529	0.520767	8.92614	0.112047	0.73088		3.00667	6.68334	3.45934	4.89836	11.9624	1.9687	7.43725	8.11352	9.57077	8.79347	5.06969	1.50337	3.76847	5.36945	6.975	10.1714	9.31143
Brcc3	8.12843	0.289025	0.46407	8.92405	0.112132	0.730928		4.0089	10.6933	6.05384	12.7357	6.52495	2.95304	4.64828	9.27259	8.50735	5.59585	14.3641	4.51011	5.02462	4.29556	12.2062	13.9856	12.8032
Lyl1	18.8493	-0.321216	0.292503	8.90893	0.112752	0.73415		16.0356	18.7134	33.7285	25.4715	21.7498	12.7965	11.1559	9.27259	19.1415	22.3834	19.4338	21.0472	14.4458	12.8867	19.1812	26.6998	16.295
Ppan	4.66622	-1.01951	0.637907	8.90817	0.112783	0.73415		11.0245	8.02001	1.72967	2.93902	6.52495	4.92174	9.29656	3.47722	2.12684	4.79644	3.37979	8.26853	2.51231	1.07389	0.871875	2.54284	5.81964
Abr	48.4006	0.199864	0.201117	8.89919	0.113154	0.735027		50.1112	61.4867	37.1879	41.1462	29.3623	42.327	57.6387	63.7491	37.2197	55.159	54.9217	45.1011	51.5024	59.064	38.3625	49.5854	48.885
Mir22hg	10.2328	-0.666168	0.418956	8.90005	0.113118	0.735027		18.04	17.3767	7.78351	4.89836	10.8749	14.7652	19.5228	6.95444	10.6342	6.39525	10.9843	9.7719	8.79309	10.7389	7.84687	5.08568	3.49178
Zfp628	3.1075	0.237248	0.813577	8.9024	0.113021	0.735027		2.00445	1.33667	1.72967	1.95934	4.34997	2.95304	1.85931	2.31815	9.57077	0.799406	5.91464	0	0.628078	5.36945	2.61562	1.27142	8.1475
Cirbp	10.7384	0.494879	0.451265	8.88612	0.113694	0.735475		10.0222	8.02001	1.72967	11.7561	6.52495	15.7496	20.4524	8.11352	11.6976	10.3923	10.1394	13.5303	20.0985	1.07389	11.3344	11.4428	10.4754
Gm12166	7.15287	0.421153	0.542514	8.8899	0.113537	0.735475		6.01335	2.67334	9.51318	8.81705	2.17498	6.89044	7.43725	1.15907	7.44393	10.3923	9.29444	12.7786	13.8177	2.14778	10.4625	1.27142	9.31143
Hipk1	20.1379	0.234959	0.307638	8.88728	0.113646	0.735475		17.0378	6.68334	22.4857	19.5934	30.4498	17.7183	12.0855	16.227	18.0781	22.3834	23.6586	20.2955	15.702	18.2561	20.0531	40.6854	20.9507
Idi1	10.8454	-1.09586	0.446887	8.88774	0.113626	0.735475		21.0467	18.7134	25.945	10.7764	6.52495	16.7339	13.9448	10.4317	2.12684	2.39822	4.22474	9.02021	8.79309	11.8128	6.10312	7.62852	8.1475
Phldb1	2.03128	0.0884574	0.911057	8.89498	0.113327	0.735475		6.01335	1.33667	1.72967	0	2.17498	0.984348	4.64828	1.15907	1.06342	1.59881	1.6899	0	5.02462	3.22167	2.61562	1.27142	0
Rps7-ps3	10.5551	1.34569	0.46673	8.89069	0.113504	0.735475		8.0178	13.3667	4.32417	1.95934	2.17498	8.85913	13.0152	10.4317	6.38051	10.3923	10.1394	24.0539	18.8423	20.4039	13.95	3.81426	9.31143
Aprt	55.3563	0.0698965	0.215247	8.88206	0.113862	0.736056		82.1824	78.8634	41.5121	39.1869	38.0622	50.2018	50.2014	56.7946	39.3465	56.7579	54.9217	75.9201	69.0886	57.9901	44.4656	50.8568	54.7046
Eif1	190.24	-0.23002	0.132318	8.86848	0.114427	0.739196		273.607	207.184	195.453	205.731	196.836	169.308	202.665	177.338	139.308	177.468	185.889	183.411	206.638	231.96	158.681	153.842	168.77
B430306N03Rik	13.3604	0.139946	0.407817	8.86566	0.114544	0.739444		17.0378	14.7033	6.91868	9.79672	6.52495	14.7652	6.50759	35.9313	13.8244	8.79347	15.2091	12.7786	6.28078	20.4039	9.59062	15.257	12.8032
Card11	1.73962	-1.50401	1.02963	8.85974	0.114791	0.740019		1.00222	0	2.5945	5.87803	6.52495	1.9687	0	0	3.19026	1.59881	0.844949	0	0.628078	0	1.74375	1.27142	2.32786
Vasp	32.4534	0.502827	0.252362	8.86082	0.114746	0.740019		22.0489	21.3867	16.4319	34.2885	29.3623	29.5304	48.3421	26.6587	35.0928	39.1709	43.9373	33.0741	28.8916	21.4778	31.3875	39.414	51.2128
Cdca7	1.75288	-1.12401	1.14845	8.85429	0.115019	0.74098		3.00667	9.35668	0	0	2.17498	4.92174	0.929656	1.15907	0	0.799406	0.844949	0	2.51231	3.22167	0.871875	0	0
Sh2b3	20.2759	-0.287996	0.281177	8.85141	0.11514	0.741245		35.0779	16.04	19.0264	21.5528	22.8373	24.6087	21.3821	13.9089	15.9513	11.9911	21.9687	24.8056	23.2389	16.1084	13.95	17.7999	24.4425
Ddx1	13.5163	-0.534307	0.343824	8.84471	0.115421	0.742545		17.0378	26.7334	14.7022	13.7154	10.8749	11.8122	9.29656	20.8633	12.761	8.79347	11.8293	17.2887	11.3054	17.1822	9.59062	10.1714	5.81964
Alg10b	9.92966	-0.369898	0.406942	8.83104	0.115996	0.745736		19.0423	9.35668	11.2428	6.8577	7.61244	18.7026	8.3669	8.11352	9.57077	6.39525	8.44949	11.2753	13.1896	7.51723	12.2062	5.08568	5.81964
Ccpg1	9.16484	0.698046	0.490817	8.81759	0.116565	0.746829		1.00222	0	13.8374	10.7764	8.69993	9.84348	8.3669	5.79537	6.38051	15.1887	15.2091	12.027	6.90886	8.59112	12.2062	13.9856	6.98357
Diaph3	1.80064	-0.0522425	1.05044	8.81992	0.116466	0.746829		1.00222	1.33667	1.72967	0	1.08749	4.92174	3.71862	5.79537	2.12684	0.799406	0	3.00674	3.14039	1.07389	0.871875	0	0
Ltv1	6.50934	-0.552153	0.516072	8.81904	0.116503	0.746829		8.0178	13.3667	7.78351	2.93902	5.43746	7.87479	15.8041	6.95444	2.12684	2.39822	5.91464	6.01348	7.53694	5.36945	3.4875	3.81426	5.81964
Man1a	31.0498	0.0222395	0.267294	8.82454	0.116271	0.746829		24.0534	10.6933	26.8099	43.1056	36.9747	39.3739	36.2566	31.295	32.966	27.1798	43.9373	32.3224	33.2881	18.2561	20.925	34.3283	36.0818
Zfp26	2.58607	-0.815648	0.899103	8.82175	0.116389	0.746829		6.01335	2.67334	2.5945	0	2.17498	5.90609	1.85931	0	3.19026	1.59881	5.91464	3.75842	1.88423	0	5.23125	0	1.16393
Bicd2	10.4614	-0.149344	0.40341	8.81412	0.116712	0.747259		22.0489	9.35668	7.78351	10.7764	4.34997	9.84348	13.0152	8.11352	11.6976	17.5869	7.60454	9.7719	14.4458	8.59112	6.975	8.89994	6.98357
Taok3	20.891	0.242574	0.32387	8.81104	0.116843	0.747587		12.0267	14.7033	29.4044	19.5934	13.0499	19.687	11.1559	30.1359	41.4733	19.9852	25.3485	14.282	16.33	26.8473	15.6937	27.9712	17.4589
Cycs	62.3877	-0.293556	0.206015	8.80424	0.117132	0.748412		65.1446	118.963	47.5659	51.9226	64.162	75.7948	48.3421	67.2263	68.0588	51.9614	65.906	55.6247	57.7832	64.4334	42.7219	52.1282	62.8521
Sacm1l	12.0285	0.0184195	0.417095	8.80458	0.117117	0.748412		4.0089	17.3767	11.2428	13.7154	5.43746	26.5774	15.8041	12.7498	15.9513	5.59585	6.75959	15.7854	11.3054	12.8867	9.59062	12.7142	6.98357
Dleu2	5.50332	-0.400056	0.514734	8.80057	0.117288	0.748902		5.01112	4.01	8.64834	6.8577	10.8749	1.9687	3.71862	4.6363	5.3171	7.19466	5.91464	1.50337	2.51231	3.22167	8.71875	7.62852	5.81964
Ech1	30.1509	-0.122867	0.264561	8.79796	0.117399	0.749101		26.0578	21.3867	33.7285	37.2275	32.6248	25.5931	17.6635	25.4996	36.1562	51.9614	42.2474	32.3224	30.1477	16.1084	25.2844	31.7855	26.7704
Sco2	5.65362	0.796558	0.56014	8.79268	0.117625	0.750027		8.0178	5.34667	2.5945	1.95934	5.43746	3.93739	2.78897	6.95444	3.19026	0.799406	8.44949	3.00674	9.42117	16.1084	3.4875	7.62852	6.98357
Magt1	10.8799	0.409082	0.400924	8.79051	0.117717	0.750107		9.02002	14.7033	17.2967	5.87803	7.61244	5.90609	1.85931	18.5452	10.6342	5.59585	5.91464	13.5303	11.3054	17.1822	13.0781	15.257	11.6393
Slc16a3	9.19645	0.715188	0.480649	8.7757	0.118352	0.753639		2.00445	10.6933	6.91868	6.8577	5.43746	10.8278	15.8041	17.3861	7.44393	3.99703	4.22474	6.76516	12.5616	17.1822	17.4375	3.81426	6.98357
Hjurp	3.00534	-1.21728	0.761393	8.76537	0.118797	0.755444		9.02002	4.01	6.05384	3.91869	1.08749	4.92174	0.929656	3.47722	0	1.59881	0	5.26179	3.14039	2.14778	4.35937	0	1.16393
Rusc2	11.4492	0.217822	0.386586	8.76606	0.118767	0.755444		16.0356	14.7033	6.91868	11.7561	3.26248	8.85913	17.6635	15.068	8.50735	8.79347	10.9843	15.0337	18.2143	12.8867	7.84687	7.62852	10.4754
Nrbp1	16.3476	0.0147658	0.318719	8.75742	0.11914	0.757113		16.0356	10.6933	22.4857	14.6951	15.2249	20.6713	14.8745	8.11352	22.3318	19.1858	16.899	11.2753	15.0739	9.66501	22.6687	22.8856	15.1311
Lox	4.03262	-2.32025	0.940703	8.75331	0.119318	0.757727		16.0356	18.7134	0.864834	1.95934	1.08749	5.90609	0	5.79537	2.12684	2.39822	5.06969	0	1.88423	3.22167	0	0	3.49178
Dnase1l1	62.298	-0.127803	0.201449	8.7448	0.119687	0.759459		66.1468	54.8034	63.9977	68.577	77.2119	47.2487	58.5683	53.3174	58.4881	71.9466	65.061	69.9067	45.2216	42.9556	45.3375	100.442	69.8357
Ubl7	18.2737	0.119863	0.316895	8.74328	0.119752	0.759459		12.0267	14.7033	17.2967	20.5731	19.5749	12.7965	13.9448	15.068	38.2831	20.7846	19.4338	17.2887	12.5616	11.8128	19.1812	26.6998	18.6229
Alox5ap	138.424	0.118804	0.16151	8.73991	0.119899	0.759874		123.274	147.033	137.509	114.622	96.7868	212.619	177.564	132.134	114.849	124.707	126.742	153.344	140.061	150.345	156.937	113.156	131.524
Prdm1	3.44289	-0.362206	0.720457	8.73009	0.120327	0.762069		3.00667	0	3.45934	6.8577	9.78743	0.984348	4.64828	2.31815	1.06342	2.39822	6.75959	0.751684	3.14039	1.07389	3.4875	7.62852	1.16393
Naa50	50.099	-0.251249	0.199563	8.72425	0.120581	0.762651		63.1401	77.5267	38.9175	42.1259	51.1121	49.2174	54.8497	60.2718	41.4733	47.9644	54.0767	48.1078	55.899	40.8078	33.1312	40.6854	52.3768
Ube3b	13.7776	-0.0762045	0.346966	8.7247	0.120562	0.762651		19.0423	13.3667	12.9725	15.6748	10.8749	12.7965	13.0152	12.7498	18.0781	9.59288	6.75959	21.7989	17.5862	12.8867	20.925	11.4428	4.65571
BC051226	2.90957	0.324843	0.785005	8.71667	0.120913	0.763049		0	1.33667	2.5945	3.91869	4.34997	1.9687	0.929656	4.6363	4.25368	7.19466	1.6899	1.50337	1.25616	1.07389	1.74375	6.3571	4.65571
Hsd17b11	33.4181	0.309733	0.244431	8.71909	0.120807	0.763049		26.0578	16.04	38.9175	25.4715	40.2372	24.6087	36.2566	31.295	34.0294	38.3715	43.9373	36.0809	26.3793	23.6256	39.2344	44.4997	43.0653
Mtrr	4.35549	0.07929	0.621531	8.71537	0.12097	0.763049		6.01335	8.02001	1.72967	1.95934	2.17498	8.85913	6.50759	2.31815	3.19026	3.99703	1.6899	6.76516	8.16502	4.29556	3.4875	2.54284	2.32786
S100a6	303.548	1.16908	0.165166	8.71855	0.120831	0.763049		206.458	227.234	179.021	97.9672	108.749	355.35	370.003	336.131	398.782	359.733	351.499	396.889	379.987	380.157	388.856	284.798	338.703
Parvg	5.87075	-0.294896	0.504506	8.70335	0.121498	0.763937		8.0178	9.35668	6.05384	6.8577	4.34997	7.87479	4.64828	4.6363	4.25368	2.39822	1.6899	8.26853	10.0492	10.7389	4.35937	5.08568	1.16393
Rbm28	7.29949	-0.367835	0.526629	8.70289	0.121518	0.763937		18.04	2.67334	3.45934	9.79672	5.43746	7.87479	10.2262	8.11352	10.6342	6.39525	4.22474	9.02021	12.5616	2.14778	5.23125	1.27142	6.98357
Rhoc	46.3638	0.108455	0.257084	8.70837	0.121277	0.763937		68.1513	78.8634	20.756	32.3292	31.5373	40.3583	51.1311	57.9537	52.1075	36.7727	38.8676	54.1213	54.6428	40.8078	40.1062	41.9568	47.7211
Zfp213	1.45792	-1.63289	1.11778	8.70287	0.121519	0.763937		2.00445	5.34667	0	0.979672	3.26248	1.9687	1.85931	2.31815	0	1.59881	0.844949	0.751684	0.628078	3.22167	0	0	0
Zfp697	1.6842	1.36836	1.10998	8.70355	0.121489	0.763937		2.00445	0	1.72967	0	0	1.9687	5.57794	0	2.12684	0	1.6899	4.51011	2.51231	2.14778	0.871875	0	3.49178
Arl8a	54.2824	-0.0854863	0.195911	8.69726	0.121766	0.764979		82.1824	65.4967	41.5121	51.9226	54.3746	50.2018	70.6538	55.6356	38.2831	42.3685	39.7126	57.128	58.4113	55.8423	57.5437	44.4997	57.0325
Ptpn7	16.2531	-0.211947	0.387095	8.69525	0.121855	0.765023		18.04	25.3967	9.51318	4.89836	18.4874	32.4835	20.4524	12.7498	12.761	16.7875	17.7439	21.7989	19.4704	16.1084	9.59062	16.5285	3.49178
Leng8	8.83176	-0.925462	0.429604	8.69164	0.122014	0.765509		19.0423	10.6933	7.78351	9.79672	11.9624	12.7965	9.29656	5.79537	7.44393	7.99406	2.53485	14.282	7.53694	7.51723	3.4875	6.3571	5.81964
Gm6377	2.44087	-1.85129	0.849598	8.6895	0.122108	0.765588		4.0089	1.33667	2.5945	9.79672	7.61244	0.984348	2.78897	0	0	0.799406	2.53485	1.50337	0.628078	0	0.871875	2.54284	3.49178
Cyb5r3	60.504	-0.257089	0.214059	8.68493	0.122311	0.766344		79.1757	104.26	56.2142	44.0852	45.6747	56.1078	71.5835	81.1352	58.4881	61.5543	54.0767	48.1078	43.9655	62.2856	51.4406	39.414	70.9996
Capn1	20.9002	-0.103105	0.310126	8.68237	0.122424	0.766542		9.02002	18.7134	25.0802	30.3698	16.3124	31.4991	16.7338	15.068	24.4586	29.578	28.7283	18.0404	16.33	13.9606	29.6437	17.7999	13.9671
Pik3r1	14.049	-0.666844	0.357519	8.68018	0.122521	0.766635		13.0289	13.3667	26.8099	18.6138	20.6623	13.7809	5.57794	11.5907	7.44393	20.7846	12.6742	15.0337	7.53694	5.36945	13.95	13.9856	18.6229
Plekho1	59.0897	0.213883	0.189107	8.67378	0.122805	0.766933		55.1223	60.1501	45.8362	60.7397	71.7745	37.4052	47.4124	54.4765	39.3465	66.3507	77.7353	62.3898	66.5763	66.5812	61.0312	55.9425	75.6553
Prcp	22.772	-0.0355382	0.279083	8.67358	0.122814	0.766933		15.0334	17.3767	29.4044	32.3292	22.8373	20.6713	15.8041	24.3406	27.6489	24.7816	24.5035	14.282	18.2143	17.1822	19.1812	35.5998	27.9343
Uqcrq	82.0838	0.211117	0.164289	8.6758	0.122715	0.766933		75.1668	86.8834	69.1868	67.5974	70.687	91.5444	81.8097	86.9305	84.0101	67.9495	81.1151	102.981	84.1625	121.35	89.8031	59.7567	74.4914
Appl2	12.1309	-0.360196	0.367383	8.66626	0.12314	0.767941		17.0378	8.02001	11.2428	16.6544	13.0499	10.8278	14.8745	5.79537	9.57077	22.3834	13.5192	15.0337	10.0492	6.44334	9.59062	13.9856	8.1475
Sft2d1	35.4398	-0.573162	0.234926	8.66687	0.123113	0.767941		50.1112	46.7834	45.8362	48.0039	40.2372	32.4835	46.4828	33.6131	23.3952	18.3863	17.7439	42.0943	37.0566	38.66	24.4125	29.2427	27.9343
Calhm2	5.96305	-0.352343	0.50886	8.65134	0.123805	0.77158		3.00667	2.67334	7.78351	14.6951	8.69993	4.92174	6.50759	3.47722	3.19026	9.59288	4.22474	3.75842	4.39655	3.22167	5.23125	10.1714	5.81964
Psd4	13.3447	0.295524	0.382475	8.64166	0.124239	0.773256		16.0356	2.67334	8.64834	16.6544	11.9624	15.7496	8.3669	13.9089	12.761	21.584	16.054	9.7719	12.5616	6.44334	11.3344	19.0713	23.2786
Tbc1d31	2.91862	0.281393	0.795327	8.64244	0.124204	0.773256		5.01112	1.33667	1.72967	0	4.34997	1.9687	7.43725	3.47722	3.19026	0	4.22474	3.75842	1.25616	5.36945	1.74375	1.27142	3.49178
Mybbp1a	16.2405	0.113215	0.329752	8.63608	0.12449	0.774303		21.0467	24.06	8.64834	9.79672	15.2249	20.6713	18.5931	19.7043	9.57077	15.9881	11.8293	15.7854	27.6354	13.9606	13.0781	16.5285	13.9671
Anapc2	22.4976	0.11528	0.275358	8.61766	0.125321	0.777921		17.0378	18.7134	18.1615	20.5731	30.4498	23.6244	16.7338	20.8633	27.6489	21.584	26.1934	24.8056	12.5616	19.33	22.6687	25.4284	36.0818
Gna15	5.91287	0.389087	0.594628	8.61875	0.125272	0.777921		7.01557	10.6933	0.864834	1.95934	3.26248	8.85913	10.2262	3.47722	7.44393	4.79644	5.06969	6.01348	8.79309	12.8867	1.74375	5.08568	2.32786
Itga6	15.1795	-0.863621	0.332531	8.61891	0.125265	0.777921		25.0556	32.08	17.2967	17.6341	11.9624	23.6244	10.2262	12.7498	13.8244	10.3923	9.29444	15.0337	15.0739	16.1084	9.59062	7.62852	10.4754
Fkbp5	1.94385	-1.04871	0.992199	8.60795	0.125761	0.779716		4.0089	2.67334	0	1.95934	2.17498	3.93739	5.57794	1.15907	1.06342	2.39822	0	3.00674	3.14039	1.07389	0.871875	0	0
Srgap2	26.3608	-0.453861	0.273947	8.60761	0.125777	0.779716		12.0267	33.4167	35.4582	39.1869	36.9747	20.6713	21.3821	33.6131	35.0928	25.581	21.9687	24.0539	13.8177	19.33	20.925	26.6998	27.9343
Jade2	15.1931	0.308777	0.338273	8.6054	0.125877	0.779821		11.0245	9.35668	8.64834	19.5934	11.9624	18.7026	18.5931	6.95444	21.2684	24.7816	19.4338	13.5303	15.0739	8.59112	16.5656	19.0713	15.1311
Map4k5	2.72455	0.157106	0.854159	8.59654	0.12628	0.780092		3.00667	0	0	5.87803	2.17498	1.9687	4.64828	4.6363	2.12684	5.59585	4.22474	0.751684	5.6527	1.07389	0.871875	2.54284	1.16393
Plxna2	7.19224	-0.624495	0.507796	8.59856	0.126188	0.780092		11.0245	6.68334	3.45934	10.7764	6.52495	6.89044	16.7338	10.4317	5.3171	5.59585	8.44949	6.01348	11.9335	2.14778	4.35937	1.27142	4.65571
Serpinb9b	3.54553	0.950775	0.78089	8.59795	0.126216	0.780092		3.00667	13.3667	0	0	1.08749	0.984348	0.929656	5.79537	5.3171	3.19763	1.6899	3.00674	2.51231	6.44334	4.35937	5.08568	3.49178
Tifa	21.2991	-0.136989	0.294034	8.59528	0.126337	0.780092		12.0267	20.05	36.323	31.3495	18.4874	19.687	19.5228	10.4317	29.7757	21.584	19.4338	16.5371	16.33	18.2561	25.2844	19.0713	27.9343
Tmed9	46.6459	0.221844	0.200627	8.59759	0.126232	0.780092		45.1001	50.7934	47.5659	23.5121	38.0622	53.1548	50.2014	54.4765	53.171	41.5691	43.9373	57.8797	52.7586	52.6206	50.5687	36.8712	40.7375
Bcl9l	2.32135	-0.946526	0.928643	8.58792	0.126673	0.781174		1.00222	2.67334	1.72967	3.91869	3.26248	4.92174	0.929656	0	3.19026	3.19763	3.37979	0.751684	0	0	0.871875	3.81426	5.81964
Pik3c3	6.53604	0.0320857	0.493369	8.58779	0.126679	0.781174		3.00667	1.33667	12.9725	10.7764	8.69993	2.95304	5.57794	5.79537	8.50735	5.59585	5.91464	4.51011	6.28078	2.14778	8.71875	10.1714	8.1475
Hk2	7.7342	-0.321847	0.459973	8.57004	0.127492	0.785672		10.0222	17.3767	7.78351	5.87803	4.34997	8.85913	8.3669	13.9089	4.25368	2.39822	5.06969	6.01348	8.16502	9.66501	3.4875	8.89994	6.98357
Arhgap45	35.138	-0.0275003	0.250931	8.5656	0.127697	0.786413		23.0512	33.4167	46.7011	24.4918	39.1497	34.4522	29.749	31.295	49.9807	49.5632	33.7979	45.8528	27.0074	20.4039	40.9781	40.6854	26.7704
Septin11	10.2831	-0.769089	0.450258	8.5596	0.127973	0.787599		14.0311	26.7334	11.2428	9.79672	4.34997	12.7965	16.7338	10.4317	9.57077	8.79347	3.37979	10.5236	11.9335	7.51723	5.23125	1.27142	10.4754
Dcbld2	9.43981	1.71342	0.556846	8.54717	0.128547	0.790613		8.0178	5.34667	0	0.979672	1.08749	8.85913	16.7338	24.3406	14.8879	11.9911	17.7439	6.76516	12.5616	10.7389	6.975	7.62852	5.81964
Zfp513	6.49097	0.157759	0.511606	8.54466	0.128663	0.790808		8.0178	1.33667	4.32417	9.79672	9.78743	4.92174	5.57794	1.15907	7.44393	8.79347	10.1394	2.25505	8.79309	6.44334	6.10312	3.81426	11.6393
Cd3eap	5.02041	0.18391	0.554027	8.53029	0.129331	0.792762		6.01335	6.68334	1.72967	5.87803	5.43746	0.984348	4.64828	4.6363	7.44393	4.79644	7.60454	0.751684	5.6527	6.44334	4.35937	7.62852	4.65571
Mrps18a	21.5642	0.063387	0.282994	8.53154	0.129273	0.792762		19.0423	9.35668	21.6209	28.4105	23.9248	21.6557	14.8745	19.7043	22.3318	35.1739	24.5035	22.5505	20.7266	13.9606	23.5406	25.4284	19.7868
Mrps6	5.28044	-0.554667	0.596837	8.52689	0.129489	0.792762		8.0178	6.68334	4.32417	11.7561	3.26248	7.87479	1.85931	2.31815	0	3.99703	5.06969	4.51011	6.90886	7.51723	0	6.3571	9.31143
mt-Nd6	27.8288	-7.31674	0.775436	8.52908	0.129387	0.792762		113.251	148.37	91.6724	53.882	61.987	0	0	0	0	0	0.844949	0.751684	1.25616	1.07389	0	0	0
Smarca5	12.5766	0.0437134	0.381537	8.52733	0.129469	0.792762		17.0378	17.3767	3.45934	10.7764	10.8749	16.7339	13.9448	6.95444	10.6342	14.3893	13.5192	21.0472	16.33	12.8867	6.975	12.7142	8.1475
Tom1	24.8981	0.0364759	0.270777	8.53462	0.12913	0.792762		38.0845	25.3967	18.1615	18.6138	17.3999	30.5148	28.8193	26.6587	25.5221	23.9822	22.8136	28.564	35.8005	18.2561	25.2844	25.4284	13.9671
Lbh	4.89532	-0.474066	0.589572	8.52423	0.129613	0.793002		0	9.35668	3.45934	8.81705	10.8749	4.92174	2.78897	6.95444	2.12684	2.39822	6.75959	2.25505	3.14039	7.51723	3.4875	2.54284	5.81964
Cisd1	14.4956	0.377313	0.344661	8.50458	0.130533	0.797905		12.0267	22.7234	8.64834	7.83738	11.9624	17.7183	10.2262	26.6587	10.6342	11.9911	9.29444	17.2887	17.5862	18.2561	13.0781	16.5285	13.9671
Tspan13	16.8199	0.518476	0.331271	8.50347	0.130585	0.797905		15.0334	10.6933	12.9725	16.6544	14.1374	11.8122	10.2262	13.9089	12.761	25.581	27.0384	12.027	10.6773	19.33	27.0281	21.6141	24.4425
Cytip	3.19087	0.92316	0.811419	8.49859	0.130814	0.798785		3.00667	2.67334	0.864834	0.979672	2.17498	0.984348	3.71862	0	4.25368	3.99703	6.75959	1.50337	1.25616	2.14778	0.871875	5.08568	13.9671
Eps15	19.4398	-0.536372	0.327996	8.48321	0.131539	0.799349		9.02002	17.3767	27.6747	27.4308	25.0123	35.4365	24.1711	9.27259	22.3318	23.1828	15.2091	18.0404	16.9581	8.59112	16.5656	19.0713	15.1311
Gm45871	2.13252	0.0886221	0.980828	8.48635	0.131391	0.799349		2.00445	1.33667	0.864834	0	6.52495	0	0.929656	5.79537	1.06342	3.19763	3.37979	0	0.628078	5.36945	2.61562	2.54284	0
Hhex	15.6113	0.195611	0.349413	8.48454	0.131476	0.799349		17.0378	13.3667	13.8374	10.7764	7.61244	31.4991	17.6635	23.1815	12.761	14.3893	8.44949	18.7921	21.9827	11.8128	10.4625	17.7999	13.9671
Nlrx1	3.55071	-0.0374238	0.674106	8.48841	0.131294	0.799349		2.00445	1.33667	3.45934	3.91869	7.61244	2.95304	1.85931	1.15907	6.38051	4.79644	2.53485	5.26179	2.51231	0	6.10312	3.81426	4.65571
Pnn	7.8613	-0.375497	0.470126	8.48215	0.131589	0.799349		14.0311	12.03	3.45934	8.81705	4.34997	7.87479	9.29656	11.5907	6.38051	5.59585	9.29444	8.26853	8.79309	8.59112	0.871875	5.08568	9.31143
Rnf130	62.614	-0.024549	0.197381	8.48461	0.131473	0.799349		52.1157	60.1501	82.1593	43.1056	73.9494	73.8261	80.8801	46.363	60.6149	50.3626	67.5959	60.1348	57.7832	52.6206	64.5187	52.1282	86.1307
Supt4a	31.4066	0.49255	0.239501	8.49278	0.131088	0.799349		17.0378	18.7134	32.8637	25.4715	29.3623	28.5461	31.6083	30.1359	43.6002	38.3715	34.6429	29.3157	22.6108	32.2167	40.1062	43.2283	36.0818
Tmem273	15.3592	0.327561	0.365407	8.49095	0.131174	0.799349		15.0334	9.35668	15.567	8.81705	7.61244	23.6244	20.4524	22.0224	8.50735	9.59288	21.1237	24.0539	16.33	26.8473	10.4625	8.89994	12.8032
Traf5	2.46797	0.69194	0.835003	8.47797	0.131787	0.800033		0	0	3.45934	1.95934	4.34997	0.984348	2.78897	1.15907	1.06342	3.99703	5.06969	2.25505	2.51231	0	2.61562	5.08568	4.65571
Dnajc12	4.31615	0.306222	0.673051	8.47503	0.131926	0.800145		1.00222	1.33667	4.32417	0.979672	8.69993	7.87479	6.50759	2.31815	8.50735	3.99703	4.22474	3.75842	3.14039	1.07389	6.10312	2.54284	6.98357
Klf2	5.52107	0.504546	0.580326	8.47397	0.131977	0.800145		3.00667	2.67334	6.91868	2.93902	6.52495	6.89044	2.78897	4.6363	11.6976	4.79644	1.6899	2.25505	2.51231	4.29556	13.0781	10.1714	6.98357
Tagln2	137.947	-0.037956	0.172296	8.47128	0.132104	0.800399		168.374	172.43	81.2944	102.866	109.837	175.214	163.619	148.361	164.83	161.48	155.471	138.31	159.532	120.276	106.369	100.442	116.393
Hax1	32.6501	0.137174	0.247712	8.46853	0.132235	0.800674		37.0823	38.7634	31.134	22.5325	21.7498	25.5931	36.2566	53.3174	37.2197	34.3745	26.1934	24.0539	26.3793	42.9556	31.3875	24.157	41.9014
Abcb7	5.51771	-0.612467	0.548776	8.4614	0.132574	0.802209		10.0222	9.35668	7.78351	6.8577	2.17498	1.9687	5.57794	6.95444	4.25368	5.59585	7.60454	0.751684	5.02462	9.66501	5.23125	3.81426	1.16393
Fads3	2.09802	-0.0780283	0.910225	8.45882	0.132696	0.802432		4.0089	1.33667	2.5945	0	1.08749	3.93739	2.78897	3.47722	3.19026	0.799406	0	3.00674	1.25616	4.29556	2.61562	1.27142	0
Gas2l3	12.4976	-0.315815	0.388504	8.44969	0.133132	0.804028		21.0467	12.03	17.2967	10.7764	6.52495	12.7965	16.7338	24.3406	9.57077	6.39525	7.60454	14.282	15.0739	8.59112	9.59062	13.9856	5.81964
Psmb3	50.1416	0.240811	0.203198	8.45093	0.133073	0.804028		59.1312	46.7834	30.2692	41.1462	50.0246	49.2174	49.2718	62.59	36.1562	45.5662	65.061	44.3494	45.2216	60.1378	47.9531	50.8568	68.6718
Hsd3b7	14.6981	-0.11852	0.326519	8.44413	0.133398	0.805115		21.0467	20.05	13.8374	12.7357	16.3124	9.84348	13.0152	22.0224	7.44393	7.99406	10.9843	19.5438	21.9827	19.33	13.0781	10.1714	10.4754
Zbtb18	5.33742	-0.305652	0.589797	8.43859	0.133663	0.806197		13.0289	8.02001	5.18901	1.95934	3.26248	3.93739	6.50759	3.47722	6.38051	6.39525	1.6899	6.01348	8.79309	10.7389	1.74375	1.27142	2.32786
Ndufc1	45.4801	0.433913	0.22766	8.43203	0.133978	0.807577		56.1246	36.09	26.8099	30.3698	34.7997	51.1861	64.1463	61.4309	44.6636	35.9733	38.8676	39.8393	56.527	52.6206	60.1594	52.1282	31.4261
Exosc1	7.7984	-0.642059	0.473782	8.4185	0.13463	0.81046		9.02002	12.03	4.32417	11.7561	5.43746	14.7652	9.29656	10.4317	2.12684	9.59288	9.29444	4.51011	6.90886	9.66501	2.61562	3.81426	6.98357
Rin2	19.0819	-0.088069	0.314581	8.41933	0.13459	0.81046		32.0712	24.06	13.8374	14.6951	10.8749	25.5931	17.6635	25.4996	13.8244	16.7875	16.054	28.564	21.3547	15.0345	21.7969	12.7142	13.9671
Polr3h	4.27853	-1.01888	0.598689	8.4106	0.135012	0.812238		7.01557	4.01	4.32417	4.89836	7.61244	8.85913	3.71862	3.47722	1.06342	3.19763	1.6899	9.02021	3.14039	3.22167	2.61562	2.54284	2.32786
Man2b2	36.9743	0.505345	0.232565	8.39674	0.135684	0.815757		17.0378	21.3867	47.5659	39.1869	31.5373	31.4991	33.4676	34.7722	44.6636	35.9733	31.2631	44.3494	38.9408	44.0295	55.8	44.4997	32.59
Mllt6	7.46931	0.305504	0.536401	8.38672	0.136172	0.816593		2.00445	5.34667	3.45934	9.79672	7.61244	6.89044	15.8041	2.31815	11.6976	10.3923	11.8293	1.50337	6.90886	4.29556	4.35937	7.62852	15.1311
Pilra	6.10213	0.355951	0.648556	8.38835	0.136092	0.816593		1.00222	2.67334	0	2.93902	8.69993	17.7183	8.3669	5.79537	9.57077	11.1917	12.6742	5.26179	3.14039	1.07389	2.61562	6.3571	4.65571
Ppp1r12c	23.0516	-0.0949639	0.324995	8.38744	0.136136	0.816593		11.0245	33.4167	19.8912	28.4105	44.5872	18.7026	17.6635	9.27259	8.50735	25.581	29.5732	21.7989	19.4704	18.2561	27.9	36.8712	20.9507
Rsrp1	72.9426	-0.115418	0.242032	8.387	0.136157	0.816593		40.089	54.8034	130.59	124.418	76.1244	40.3583	56.709	78.817	79.7564	65.5513	60.8363	75.9201	58.4113	65.5073	61.0312	82.6423	88.4586
Ubl4a	11.347	-0.59589	0.378033	8.38158	0.136422	0.817572		15.0334	24.06	6.91868	10.7764	10.8749	14.7652	13.9448	17.3861	8.50735	8.79347	10.1394	6.76516	11.9335	11.8128	7.84687	6.3571	6.98357
Commd1	21.6844	0.153178	0.293523	8.37878	0.136559	0.817868		12.0267	10.6933	25.945	20.5731	29.3623	21.6557	13.0152	30.1359	23.3952	25.581	31.2631	17.2887	18.2143	16.1084	26.1562	21.6141	25.6064
Rlim	18.2159	0.0401864	0.305209	8.3751	0.136739	0.818425		19.0423	9.35668	15.567	22.5325	19.5749	21.6557	12.0855	15.068	19.1415	22.3834	21.1237	24.0539	14.4458	8.59112	23.5406	22.8856	18.6229
Ndrg1	21.1623	1.1392	0.343221	8.37273	0.136855	0.818596		15.0334	5.34667	25.945	12.7357	13.0499	16.7339	12.0855	8.11352	21.2684	35.1739	19.4338	19.5438	32.032	31.1428	40.9781	26.6998	24.4425
Otulinl	19.3505	-0.454665	0.309105	8.36824	0.137075	0.818927		28.0623	18.7134	27.6747	28.4105	15.2249	22.64	20.4524	6.95444	14.8879	17.5869	16.054	20.2955	18.8423	7.51723	14.8219	22.8856	27.9343
Prpf40a	16.0791	-0.61214	0.317408	8.36803	0.137085	0.818927		23.0512	24.06	12.9725	18.6138	18.4874	21.6557	19.5228	10.4317	9.57077	16.7875	16.899	17.2887	20.0985	11.8128	7.84687	11.4428	12.8032
Adgrl2	4.77443	0.337719	0.598514	8.35194	0.137877	0.822372		9.02002	8.02001	0.864834	1.95934	3.26248	2.95304	6.50759	3.47722	4.25368	1.59881	5.06969	9.02021	6.28078	8.59112	4.35937	1.27142	4.65571
Ipo9	8.68292	-0.741388	0.42501	8.35095	0.137925	0.822372		15.0334	13.3667	6.91868	14.6951	5.43746	10.8278	9.29656	13.9089	4.25368	7.99406	5.06969	8.26853	10.0492	7.51723	5.23125	5.08568	4.65571
Rps13	185.922	0.266253	0.118276	8.35436	0.137757	0.822372		168.374	201.837	166.913	150.869	173.999	170.292	191.509	207.474	171.21	156.684	171.525	187.921	195.96	249.142	216.225	180.542	200.196
Eif4e3	5.92794	0.257848	0.525149	8.34288	0.138324	0.823175		4.0089	2.67334	7.78351	6.8577	5.43746	4.92174	5.57794	1.15907	9.57077	5.59585	7.60454	6.01348	2.51231	3.22167	6.975	12.7142	8.1475
Neat1	75.1235	-0.468978	0.271237	8.3462	0.13816	0.823175		131.291	92.2301	65.7274	126.378	93.5243	23.6244	71.5835	57.9537	47.8539	59.1561	43.9373	133.048	109.286	78.394	50.5687	48.3139	44.2293
Sec13	25.746	0.0165608	0.262113	8.34389	0.138274	0.823175		30.0667	26.7334	21.6209	16.6544	27.1873	37.4052	21.3821	26.6587	25.5221	19.1858	28.7283	27.0606	26.3793	32.2167	24.4125	12.7142	33.7539
Ghitm	75.075	0.270396	0.179766	8.33285	0.138821	0.824976		56.1246	76.1901	77.8351	63.6787	68.512	57.0922	70.6538	62.59	120.166	75.9436	75.2004	66.8999	75.3694	95.5762	86.3156	72.4709	75.6553
Oat	22.2553	-0.28385	0.270949	8.32923	0.139	0.824976		31.069	32.08	23.3505	14.6951	17.3999	28.5461	28.8193	25.4996	20.205	18.3863	17.7439	24.0539	21.3547	22.5517	20.925	16.5285	15.1311
Rnf2	7.93552	0.144816	0.444626	8.3279	0.139067	0.824976		7.01557	4.01	6.91868	14.6951	8.69993	3.93739	7.43725	6.95444	8.50735	8.79347	7.60454	3.75842	8.16502	3.22167	8.71875	10.1714	16.295
Slc27a1	39.7355	-0.30622	0.217687	8.33058	0.138933	0.824976		53.1179	42.7734	41.5121	41.1462	38.0622	62.0139	40.9049	32.4541	31.9026	33.5751	32.108	41.3426	45.8497	46.1773	30.5156	31.7855	30.2621
Slc35f6	41.598	-0.321454	0.224962	8.32984	0.13897	0.824976		68.1513	53.4667	35.4582	41.1462	35.8872	51.1861	44.6235	32.4541	37.2197	28.7786	38.8676	56.3763	35.1724	40.8078	44.4656	30.5141	32.59
Fam110b	2.74091	0.0978264	0.755871	8.32375	0.139273	0.825523		1.00222	2.67334	1.72967	3.91869	5.43746	0.984348	0.929656	1.15907	4.25368	3.99703	5.06969	0	2.51231	3.22167	2.61562	1.27142	5.81964
Nutf2-ps1	13.9035	-0.759901	0.365842	8.32249	0.139335	0.825523		19.0423	44.11	12.1077	9.79672	14.1374	14.7652	12.0855	12.7498	7.44393	11.1917	12.6742	12.7786	11.9335	13.9606	13.0781	6.3571	8.1475
Serp1	74.7274	-0.58344	0.225377	8.31673	0.139622	0.826702		61.1357	60.1501	116.753	141.073	117.449	62.9983	54.8497	85.7715	75.5028	51.162	60.8363	41.3426	45.8497	76.2462	76.725	75.0138	67.5078
Yae1d1	8.81216	0.169846	0.410475	8.31353	0.139782	0.827124		13.0289	12.03	5.18901	7.83738	9.78743	5.90609	7.43725	6.95444	2.12684	3.99703	10.1394	10.5236	10.6773	16.1084	7.84687	5.08568	15.1311
Alkbh5	23.2687	-0.188029	0.278208	8.30699	0.140109	0.828535		15.0334	16.04	27.6747	33.3088	25.0123	22.64	27.8897	17.3861	32.966	30.3774	27.8833	17.2887	20.7266	11.8128	17.4375	24.157	27.9343
Nsmaf	4.909	-0.655767	0.592045	8.30518	0.140199	0.828546		2.00445	4.01	5.18901	7.83738	7.61244	5.90609	1.85931	5.79537	9.57077	7.19466	5.91464	2.25505	1.25616	2.14778	2.61562	7.62852	4.65571
Akr1b10	9.90852	0.144245	0.416079	8.30116	0.140401	0.828574		5.01112	5.34667	9.51318	16.6544	9.78743	7.87479	5.57794	6.95444	13.8244	14.3893	18.5889	6.76516	10.6773	6.44334	7.84687	12.7142	10.4754
Csf2rb2	48.5164	-0.618709	0.226534	8.30313	0.140302	0.828574		72.1602	32.08	42.3769	73.4754	72.8619	56.1078	53.92	45.2039	53.171	36.7727	52.3868	45.1011	37.6847	21.4778	40.1062	44.4997	45.3932
Rxylt1	7.58351	-0.153866	0.473872	8.29979	0.140469	0.828574		11.0245	8.02001	3.45934	2.93902	9.78743	10.8278	11.1559	8.11352	6.38051	7.19466	10.9843	9.7719	9.42117	7.51723	5.23125	1.27142	5.81964
Numb	9.44902	0.400626	0.407754	8.29646	0.140636	0.829037		11.0245	12.03	10.378	6.8577	2.17498	6.89044	11.1559	12.7498	7.44393	7.19466	5.91464	12.027	11.9335	18.2561	8.71875	8.89994	6.98357
Cln6	21.6668	0.00473331	0.283065	8.29365	0.140777	0.829185		18.04	10.6933	20.756	31.3495	26.0998	23.6244	16.7338	17.3861	23.3952	23.1828	22.8136	32.3224	20.0985	13.9606	26.1562	25.4284	16.295
Phf21a	6.15846	0.200782	0.518083	8.29152	0.140884	0.829185		2.00445	2.67334	6.91868	12.7357	4.34997	2.95304	8.3669	8.11352	8.50735	9.59288	5.06969	2.25505	5.6527	5.36945	7.84687	7.62852	4.65571
Ppp2r2d	6.93758	0.368951	0.531873	8.29067	0.140927	0.829185		9.02002	2.67334	0.864834	6.8577	7.61244	8.85913	6.50759	5.79537	4.25368	11.1917	9.29444	9.02021	1.88423	8.59112	3.4875	12.7142	9.31143
Cd68	642.427	-0.109361	0.101814	8.28105	0.141412	0.829432		617.37	649.621	787.864	761.205	670.982	610.296	530.833	592.287	663.574	585.965	594.844	570.529	545.172	644.334	656.522	785.737	654.128
Cpeb4	32.1568	-0.175274	0.236929	8.28325	0.1413	0.829432		40.089	34.7534	27.6747	31.3495	33.7122	36.4209	39.9752	31.295	26.5855	30.3774	29.5732	37.5842	48.362	22.5517	27.0281	19.0713	30.2621
Mff	26.5835	0.0507948	0.253318	8.28579	0.141173	0.829432		35.0779	36.09	19.0264	22.5325	20.6623	21.6557	36.2566	32.4541	21.2684	23.9822	20.2788	32.3224	33.2881	26.8473	25.2844	21.6141	23.2786
Qpct	8.64723	0.953846	0.478687	8.28144	0.141392	0.829432		4.0089	8.02001	5.18901	7.83738	3.26248	6.89044	14.8745	11.5907	10.6342	3.99703	2.53485	13.5303	11.9335	13.9606	8.71875	16.5285	3.49178
Ralgapa2	2.21345	-1.61658	1.00901	8.2817	0.141379	0.829432		2.00445	14.7033	0.864834	0	2.17498	2.95304	1.85931	3.47722	1.06342	0.799406	1.6899	2.25505	2.51231	0	0	1.27142	0
Egr1	1.62679	-0.73115	0.975481	8.27559	0.141687	0.830046		3.00667	0	0.864834	2.93902	3.26248	1.9687	0.929656	0	1.06342	3.19763	1.6899	2.25505	0.628078	0	0.871875	3.81426	1.16393
Tmem86a	41.4018	0.203976	0.215065	8.27546	0.141694	0.830046		27.0601	24.06	47.5659	56.821	43.4997	35.4365	34.3973	34.7722	46.7904	45.5662	38.8676	45.1011	34.5443	42.9556	47.0812	45.7711	53.5407
Usp34	5.05045	-0.312107	0.602572	8.27314	0.141811	0.830215		9.02002	8.02001	5.18901	2.93902	1.08749	4.92174	7.43725	3.47722	8.50735	3.19763	4.22474	9.02021	4.39655	7.51723	4.35937	2.54284	0
Fbxo7	6.29794	0.0392245	0.584633	8.27101	0.141918	0.830325		5.01112	0	2.5945	16.6544	7.61244	2.95304	11.1559	8.11352	3.19026	6.39525	10.9843	5.26179	3.76847	2.14778	5.23125	10.1714	5.81964
Atad3a	4.7744	-0.346712	0.656515	8.26644	0.14215	0.831161		10.0222	8.02001	2.5945	1.95934	2.17498	7.87479	9.29656	8.11352	0	1.59881	5.06969	8.26853	3.14039	1.07389	3.4875	3.81426	4.65571
Phb2	29.0715	-0.047199	0.273308	8.25564	0.142698	0.833184		39.0868	49.4567	20.756	14.6951	28.2748	32.4835	25.1007	23.1815	22.3318	22.3834	39.7126	34.5775	32.032	36.5123	20.0531	27.9712	25.6064
Prelid1	73.9428	0.135612	0.171398	8.25437	0.142763	0.833184		65.1446	93.5668	88.2131	57.8006	60.8995	75.7948	57.6387	67.2263	80.8199	55.159	65.061	93.9606	90.4432	91.2807	79.3406	64.8424	69.8357
Usp22	10.994	0.389379	0.42151	8.25467	0.142748	0.833184		2.00445	8.02001	6.91868	10.7764	18.4874	8.85913	5.57794	15.068	21.2684	11.1917	16.054	9.02021	8.79309	8.59112	13.0781	12.7142	10.4754
Pou2f2	3.62135	-1.35102	0.774858	8.2499	0.14299	0.833991		1.00222	2.67334	3.45934	10.7764	11.9624	2.95304	0	3.47722	6.38051	4.79644	2.53485	0	1.25616	2.14778	3.4875	0	4.65571
Spry2	3.23719	0.45493	0.776372	8.24235	0.143375	0.835717		2.00445	9.35668	0	0	4.34997	3.93739	3.71862	3.47722	2.12684	1.59881	1.6899	6.76516	5.02462	2.14778	1.74375	1.27142	5.81964
Pcca	4.02759	-0.718694	0.640813	8.23584	0.143708	0.837134		3.00667	5.34667	10.378	2.93902	3.26248	3.93739	0.929656	2.31815	7.44393	3.99703	5.91464	4.51011	1.25616	2.14778	6.10312	3.81426	1.16393
Cpeb1	7.06555	1.28024	0.561644	8.2244	0.144294	0.838865		4.0089	1.33667	1.72967	5.87803	2.17498	11.8122	13.0152	1.15907	11.6976	15.1887	8.44949	9.7719	7.53694	4.29556	8.71875	6.3571	6.98357
Lactb2	10.4984	0.579196	0.417796	8.22306	0.144363	0.838865		14.0311	10.6933	6.91868	3.91869	3.26248	14.7652	10.2262	13.9089	8.50735	7.99406	10.9843	16.5371	18.2143	10.7389	8.71875	5.08568	13.9671
Pno1	16.5473	-0.166393	0.352148	8.22612	0.144206	0.838865		21.0467	30.7434	8.64834	11.7561	9.78743	18.7026	14.8745	24.3406	17.0147	11.1917	23.6586	20.2955	11.9335	15.0345	8.71875	11.4428	22.1146
Slc25a51	14.2488	0.100016	0.345342	8.22419	0.144305	0.838865		11.0245	8.02001	12.1077	18.6138	15.2249	24.6087	6.50759	13.9089	10.6342	14.3893	15.2091	18.7921	13.1896	11.8128	11.3344	22.8856	13.9671
Ahrr	1.92636	-0.0494498	1.01804	8.21011	0.14503	0.839732		0	0	1.72967	3.91869	2.17498	0.984348	2.78897	1.15907	1.06342	9.59288	2.53485	0	1.25616	1.07389	0.871875	1.27142	2.32786
Apba1	1.97479	-0.732374	0.916699	8.20735	0.145172	0.839732		1.00222	4.01	5.18901	2.93902	0	2.95304	0.929656	1.15907	3.19026	1.59881	0.844949	0.751684	0.628078	1.07389	3.4875	3.81426	0
Apool	7.10796	-0.549197	0.458554	8.21083	0.144993	0.839732		6.01335	6.68334	12.1077	11.7561	14.1374	2.95304	1.85931	4.6363	11.6976	3.99703	5.06969	5.26179	3.14039	8.59112	9.59062	6.3571	6.98357
Gsto1	34.7937	0.345137	0.261958	8.20624	0.14523	0.839732		34.0756	40.1	34.5934	18.6138	17.3999	48.2331	26.0304	39.4085	37.2197	31.1769	42.2474	30.8191	38.9408	52.6206	47.0812	20.3427	32.59
Mapk1ip1l	17.6909	-0.307987	0.315019	8.21009	0.145031	0.839732		23.0512	20.05	16.4319	25.4715	14.1374	21.6557	24.1711	9.27259	15.9513	22.3834	10.9843	14.282	20.7266	13.9606	23.5406	16.5285	8.1475
Slc30a1	22.1764	-0.193398	0.28125	8.20832	0.145122	0.839732		17.0378	16.04	27.6747	36.2479	31.5373	14.7652	22.3117	19.7043	14.8879	26.3804	21.9687	18.0404	16.33	12.8867	28.7719	27.9712	24.4425
Tcirg1	143.667	-0.149078	0.167376	8.2173	0.14466	0.839732		197.438	143.023	160.859	196.914	139.199	89.5757	84.5987	118.226	152.069	137.498	148.711	118.766	132.524	120.276	164.784	169.099	168.77
Trim8	25.427	-0.446814	0.275262	8.21298	0.144882	0.839732		20.0445	38.7634	23.3505	27.4308	40.2372	25.5931	22.3117	34.7722	30.8392	10.3923	25.3485	24.8056	20.0985	28.995	21.7969	16.5285	20.9507
Arl4c	37.5052	0.602906	0.25943	8.20213	0.145442	0.840146		42.0934	16.04	18.1615	17.6341	20.6623	64.967	55.7794	31.295	55.2978	55.159	49.007	35.3292	33.9162	23.6256	38.3625	40.6854	39.5736
Cdc26	9.74255	0.0213576	0.391406	8.19792	0.14566	0.840146		7.01557	8.02001	7.78351	11.7561	16.3124	6.89044	9.29656	5.79537	7.44393	9.59288	16.054	8.26853	6.90886	9.66501	6.975	12.7142	15.1311
Hint1	112.658	-0.0115717	0.156469	8.20041	0.145531	0.840146		127.283	165.747	100.321	94.0485	105.487	106.31	105.981	106.635	81.8833	107.12	110.688	124.78	123.103	141.753	112.472	85.1851	116.393
Raf1	11.9807	0.276653	0.40818	8.19888	0.14561	0.840146		3.00667	10.6933	14.7022	13.7154	9.78743	7.87479	10.2262	10.4317	20.205	17.5869	15.2091	9.7719	10.6773	3.22167	10.4625	13.9856	22.1146
Acaa1a	25.0437	0.152354	0.271098	8.18884	0.146131	0.842112		20.0445	10.6933	33.7285	27.4308	25.0123	20.6713	25.1007	19.7043	31.9026	34.3745	28.7283	24.0539	25.1231	21.4778	36.6187	17.7999	23.2786
Camk1	68.8241	0.0295332	0.190463	8.18788	0.146181	0.842112		63.1401	48.12	75.2406	59.76	52.1996	110.247	91.1063	66.0672	66.9954	64.7519	74.3555	87.1954	68.4605	69.8029	47.9531	55.9425	68.6718
Nop2	7.55135	-0.389014	0.494876	8.18197	0.146488	0.842847		14.0311	10.6933	4.32417	3.91869	6.52495	11.8122	9.29656	6.95444	7.44393	3.99703	11.8293	6.01348	6.90886	12.8867	6.975	1.27142	3.49178
Pik3cb	12.8678	-0.502211	0.373192	8.18303	0.146433	0.842847		26.0578	20.05	8.64834	14.6951	10.8749	9.84348	15.8041	8.11352	12.761	14.3893	9.29444	13.5303	15.702	17.1822	3.4875	10.1714	8.1475
Jun	35.0177	-0.0487107	0.233663	8.17056	0.147083	0.843676		51.1134	34.7534	33.7285	32.3292	45.6747	29.5304	29.749	18.5452	22.3318	26.3804	35.4878	36.8325	39.5689	45.1034	20.0531	39.414	54.7046
Mitd1	7.33663	-0.128542	0.508026	8.17266	0.146973	0.843676		1.00222	5.34667	8.64834	11.7561	10.8749	5.90609	5.57794	13.9089	9.57077	9.59288	5.91464	1.50337	4.39655	8.59112	11.3344	3.81426	6.98357
P2ry6	57.0249	-0.0503038	0.198947	8.17367	0.146921	0.843676		58.129	37.4267	46.7011	57.8006	55.4621	86.6226	66.9352	59.1128	53.171	71.1472	69.2858	47.3561	45.8497	33.2906	47.0812	71.1995	62.8521
Rbbp7	25.5594	-0.458706	0.263015	8.17058	0.147082	0.843676		32.0712	42.7734	24.2154	28.4105	23.9248	32.4835	23.2414	27.8178	13.8244	21.584	23.6586	30.8191	21.3547	30.0689	23.5406	11.4428	23.2786
Tmem243	11.0554	-0.0319177	0.415098	8.17709	0.146742	0.843676		7.01557	6.68334	17.2967	10.7764	3.26248	19.687	8.3669	15.068	19.1415	11.1917	14.3641	8.26853	4.39655	8.59112	13.0781	11.4428	9.31143
Clns1a	12.1386	-0.171371	0.404474	8.15152	0.14808	0.848246		11.0245	21.3867	11.2428	18.6138	4.34997	6.89044	18.5931	19.7043	12.761	11.1917	6.75959	8.26853	7.53694	15.0345	17.4375	5.08568	10.4754
Dlgap5	1.94249	0.308532	0.97717	8.14673	0.148332	0.848246		2.00445	2.67334	3.45934	0	0	3.93739	3.71862	0	2.12684	0.799406	0	5.26179	2.51231	3.22167	0.871875	1.27142	1.16393
Gaa	22.2163	-0.242538	0.293759	8.1471	0.148313	0.848246		18.04	10.6933	43.2417	25.4715	27.1873	17.7183	16.7338	20.8633	29.7757	24.7816	19.4338	24.8056	16.9581	15.0345	19.1812	27.9712	19.7868
Serpinb8	8.223	-0.329835	0.496488	8.14726	0.148304	0.848246		10.0222	12.03	6.91868	4.89836	7.61244	9.84348	19.5228	4.6363	3.19026	10.3923	7.60454	9.7719	13.8177	6.44334	6.10312	0	6.98357
Zc3h12a	3.65973	-0.587858	0.692925	8.15331	0.147986	0.848246		10.0222	0	3.45934	3.91869	3.26248	3.93739	7.43725	5.79537	4.25368	2.39822	0.844949	3.00674	6.28078	2.14778	1.74375	2.54284	1.16393
I830077J02Rik	2.26757	-1.02612	0.928944	8.1363	0.148882	0.850872		1.00222	0	2.5945	6.8577	6.52495	1.9687	2.78897	0	4.25368	2.39822	0.844949	1.50337	1.88423	0	0	1.27142	4.65571
Pcgf5	5.35145	0.367403	0.60278	8.13116	0.149154	0.851386		2.00445	2.67334	6.05384	5.87803	2.17498	5.90609	2.78897	9.27259	12.761	4.79644	7.60454	3.00674	1.88423	4.29556	6.10312	11.4428	2.32786
Rps25	323.613	0.143432	0.114912	8.13129	0.149147	0.851386		368.819	330.157	324.313	262.552	265.348	335.663	321.661	311.791	286.06	269.4	328.685	390.876	355.492	396.265	350.494	300.055	303.785
Ssr3	53.1203	0.0877907	0.193055	8.12712	0.149368	0.852088		51.1134	72.1801	54.4846	45.0649	40.2372	57.0922	49.2718	70.7035	47.8539	36.7727	45.6272	45.8528	54.0147	68.729	53.1844	58.4853	52.3768
Dnajb11	35.2165	-0.236836	0.239625	8.10808	0.150379	0.85488		29.0645	56.1401	31.9989	41.1462	28.2748	41.3426	27.8897	56.7946	40.4099	31.9763	27.8833	29.3157	33.2881	36.5123	34.875	20.3427	31.4261
Ints8	4.55278	-0.347315	0.602894	8.11383	0.150073	0.85488		6.01335	8.02001	1.72967	3.91869	6.52495	3.93739	4.64828	3.47722	3.19026	3.19763	10.1394	0.751684	7.53694	5.36945	1.74375	2.54284	4.65571
Senp5	8.48521	-0.288109	0.439893	8.10868	0.150347	0.85488		9.02002	9.35668	6.05384	7.83738	8.69993	19.687	8.3669	6.95444	3.19026	8.79347	8.44949	13.5303	7.53694	5.36945	7.84687	8.89994	4.65571
Snrpf	20.5867	-0.283587	0.284423	8.10759	0.150405	0.85488		27.0601	38.7634	18.1615	19.5934	16.3124	22.64	19.5228	17.3861	13.8244	13.5899	18.5889	26.309	18.2143	27.9211	14.8219	13.9856	23.2786
Vav3	8.87987	0.0994796	0.437594	8.10984	0.150285	0.85488		9.02002	2.67334	9.51318	4.89836	11.9624	13.7809	14.8745	4.6363	8.50735	9.59288	9.29444	12.027	13.8177	6.44334	7.84687	5.08568	6.98357
Wdr1	85.8073	-0.048207	0.165543	8.11328	0.150102	0.85488		119.265	112.28	86.4834	66.6177	71.7745	75.7948	88.3173	88.0896	81.8833	75.1442	64.2161	97.719	82.2782	100.946	90.675	83.9137	73.3275
Rell1	14.1057	-0.26376	0.350017	8.10268	0.150667	0.855682		12.0267	9.35668	26.8099	20.5731	16.3124	13.7809	8.3669	8.11352	13.8244	19.9852	9.29444	10.5236	18.2143	9.66501	20.925	12.7142	9.31143
Tpm1	36.6349	-0.0398171	0.245866	8.10152	0.150729	0.855682		45.1001	54.8034	25.0802	24.4918	31.5373	35.4365	58.5683	38.2494	22.3318	38.3715	44.7823	34.5775	33.9162	32.2167	29.6437	31.7855	41.9014
Tceal9	38.3977	-0.299151	0.235807	8.0994	0.150842	0.855806		67.149	37.4267	69.1868	47.0243	34.7997	26.5774	25.1007	26.6587	20.205	16.7875	24.5035	48.1078	64.064	40.8078	39.2344	40.6854	24.4425
Xylt1	5.92841	-0.92092	0.590076	8.09633	0.151006	0.856218		22.0489	9.35668	3.45934	2.93902	8.69993	7.87479	7.43725	2.31815	0	3.19763	5.06969	5.26179	4.39655	6.44334	3.4875	7.62852	1.16393
Tulp4	16.9571	-0.450801	0.35393	8.09351	0.151157	0.856554		30.0667	28.07	12.9725	13.7154	9.78743	25.5931	11.1559	18.5452	19.1415	12.7905	19.4338	18.7921	23.2389	16.1084	9.59062	7.62852	11.6393
Ttc1	16.274	0.303397	0.381291	8.09137	0.151271	0.856685		12.0267	8.02001	4.32417	15.6748	31.5373	14.7652	13.9448	19.7043	22.3318	14.3893	17.7439	20.2955	10.6773	10.7389	12.2062	20.3427	27.9343
Nsd2	6.33927	-0.995633	0.516736	8.08168	0.151791	0.858501		14.0311	10.6933	3.45934	5.87803	6.52495	12.7965	6.50759	4.6363	4.25368	7.19466	3.37979	7.51684	5.02462	3.22167	1.74375	5.08568	5.81964
Pcdhgc3	1.61704	1.38964	1.22158	8.08027	0.151867	0.858501		0	4.01	0	0	0	3.93739	2.78897	3.47722	1.06342	0	1.6899	1.50337	2.51231	2.14778	4.35937	0	0
Rab20	8.91624	-0.189838	0.462646	8.081	0.151828	0.858501		14.0311	5.34667	3.45934	11.7561	9.78743	1.9687	15.8041	10.4317	9.57077	13.5899	14.3641	8.26853	8.16502	5.36945	2.61562	8.89994	8.1475
Ctps	1.7952	-1.39902	1.08426	8.07565	0.152115	0.859386		6.01335	6.68334	0	0.979672	1.08749	0.984348	1.85931	2.31815	2.12684	0	3.37979	0	3.14039	1.07389	0.871875	0	0
Bcl2l2	5.61975	-0.00844016	0.569195	8.07135	0.152347	0.860177		7.01557	8.02001	0.864834	3.91869	10.8749	6.89044	2.78897	8.11352	2.12684	1.59881	8.44949	8.26853	8.79309	2.14778	3.4875	6.3571	5.81964
Alkbh2	1.49522	-0.0909343	1.03422	8.06234	0.152833	0.862064		0	4.01	2.5945	0	3.26248	0.984348	0	1.15907	1.06342	0.799406	0.844949	1.50337	0.628078	5.36945	0.871875	0	2.32786
Oxa1l	18.0242	-0.194707	0.303874	8.06005	0.152957	0.862064		15.0334	13.3667	28.5395	20.5731	17.3999	24.6087	15.8041	8.11352	22.3318	22.3834	15.2091	17.2887	15.0739	13.9606	17.4375	24.157	15.1311
Snhg1	8.3107	0.10359	0.457863	8.06057	0.152929	0.862064		14.0311	13.3667	6.05384	3.91869	3.26248	7.87479	12.0855	5.79537	7.44393	7.99406	7.60454	9.7719	12.5616	13.9606	3.4875	5.08568	6.98357
Tbc1d2b	8.62313	-0.514307	0.447534	8.05544	0.153207	0.86295		5.01112	5.34667	17.2967	6.8577	20.6623	7.87479	5.57794	5.79537	6.38051	10.3923	10.1394	7.51684	2.51231	8.59112	9.59062	8.89994	8.1475
C130050O18Rik	1.7605	0.467177	1.02303	8.04122	0.153979	0.866777		1.00222	0	0.864834	3.91869	2.17498	0	1.85931	1.15907	1.06342	0.799406	2.53485	0.751684	0	1.07389	0.871875	2.54284	9.31143
Tnfsf12	48.8453	0.026994	0.203448	8.03292	0.154431	0.868801		72.1602	52.13	41.5121	47.0243	39.1497	49.2174	52.0607	49.8402	35.0928	41.5691	37.1777	60.8864	64.064	47.2512	55.8	33.0569	52.3768
Ccdc12	19.8492	-0.140214	0.326668	8.02286	0.15498	0.870324		18.04	13.3667	24.2154	17.6341	26.0998	21.6557	23.2414	11.5907	13.8244	28.7786	25.3485	21.0472	10.6773	12.8867	22.6687	11.4428	34.9178
Macrod1	4.23469	0.105219	0.611293	8.02567	0.154826	0.870324		7.01557	4.01	6.91868	0.979672	3.26248	5.90609	1.85931	3.47722	4.25368	2.39822	0.844949	5.26179	6.28078	4.29556	10.4625	1.27142	3.49178
Mtmr3	11.314	0.121624	0.369508	8.02381	0.154928	0.870324		9.02002	5.34667	13.8374	13.7154	13.0499	9.84348	9.29656	5.79537	18.0781	15.1887	9.29444	12.027	11.9335	6.44334	13.95	12.7142	12.8032
Mras	2.05364	-1.47099	0.924809	8.01947	0.155166	0.870843		5.01112	5.34667	0.864834	5.87803	0	0.984348	1.85931	2.31815	1.06342	3.19763	1.6899	0.751684	1.25616	2.14778	0	2.54284	0
Nap1l4	15.9532	-0.218962	0.337571	8.00883	0.15575	0.873075		27.0601	33.4167	10.378	11.7561	14.1374	14.7652	10.2262	18.5452	7.44393	13.5899	16.054	12.7786	18.2143	19.33	14.8219	8.89994	19.7868
Pdzk1ip1	13.6726	-0.369274	0.354561	8.00944	0.155716	0.873075		18.04	2.67334	27.6747	15.6748	17.3999	10.8278	16.7338	10.4317	14.8879	11.9911	12.6742	13.5303	10.6773	8.59112	17.4375	12.7142	10.4754
Dusp16	2.19792	0.79231	0.97643	8.0034	0.156048	0.874226		2.00445	4.01	0	0.979672	2.17498	0	7.43725	1.15907	0	3.19763	2.53485	0.751684	1.25616	4.29556	1.74375	0	5.81964
Asl	18.054	0.288377	0.320147	7.99786	0.156354	0.875413		20.0445	8.02001	19.8912	9.79672	23.9248	12.7965	19.5228	13.9089	23.3952	19.9852	24.5035	9.7719	13.1896	21.4778	21.7969	21.6141	23.2786
Lratd2	5.53527	-0.299156	0.658751	7.99414	0.156559	0.876036		2.00445	0	12.9725	9.79672	7.61244	4.92174	0.929656	9.27259	2.12684	4.79644	8.44949	5.26179	2.51231	0	5.23125	8.89994	9.31143
Slc35a3	9.50223	0.251144	0.430266	7.98584	0.157018	0.878081		10.0222	5.34667	8.64834	8.81705	5.43746	15.7496	14.8745	5.79537	8.50735	10.3923	5.91464	13.5303	16.9581	7.51723	3.4875	8.89994	11.6393
Zfp703	14.5415	-0.144797	0.364709	7.97953	0.157368	0.879512		10.0222	10.6933	17.2967	12.7357	25.0123	11.8122	9.29656	16.227	12.761	29.578	15.2091	7.51684	8.16502	13.9606	19.1812	11.4428	16.295
Stambpl1	5.5584	-0.214771	0.577186	7.97766	0.157471	0.879565		2.00445	2.67334	7.78351	4.89836	7.61244	5.90609	3.71862	12.7498	11.6976	3.99703	5.91464	1.50337	1.25616	5.36945	5.23125	6.3571	5.81964
Pi4k2a	28.8075	-0.310679	0.255725	7.97299	0.157731	0.880491		28.0623	26.7334	33.7285	29.3902	35.8872	44.2957	33.4676	20.8633	34.0294	21.584	20.2788	32.3224	31.4039	23.6256	34.875	22.8856	16.295
Cnot7	10.1691	-0.10847	0.425642	7.96767	0.158026	0.88109		13.0289	5.34667	6.05384	9.79672	16.3124	11.8122	10.2262	12.7498	6.38051	9.59288	15.2091	3.75842	12.5616	17.1822	3.4875	8.89994	10.4754
Mthfd1	3.50808	-0.684533	0.68864	7.96892	0.157957	0.88109		3.00667	8.02001	3.45934	2.93902	2.17498	5.90609	3.71862	4.6363	2.12684	1.59881	3.37979	7.51684	5.02462	3.22167	1.74375	0	1.16393
Cmc4	5.13778	-0.593666	0.586733	7.96482	0.158185	0.881452		3.00667	2.67334	6.91868	9.79672	14.1374	1.9687	1.85931	3.47722	7.44393	3.19763	5.91464	3.75842	2.51231	2.14778	3.4875	12.7142	2.32786
Ctsf	4.64084	1.01479	0.626026	7.96006	0.158451	0.881976		2.00445	2.67334	4.32417	3.91869	1.08749	3.93739	5.57794	3.47722	6.38051	6.39525	2.53485	9.02021	3.14039	4.29556	11.3344	7.62852	1.16393
Gdi1	17.8382	0.316177	0.307436	7.95833	0.158547	0.881976		19.0423	9.35668	12.9725	23.5121	9.78743	18.7026	24.1711	12.7498	22.3318	23.9822	16.899	19.5438	21.9827	11.8128	17.4375	20.3427	18.6229
Kif23	3.17904	-0.770634	0.733524	7.9556	0.158699	0.881976		3.00667	2.67334	8.64834	3.91869	3.26248	3.93739	1.85931	2.31815	0	0.799406	0	9.02021	5.6527	4.29556	3.4875	0	1.16393
Pbx2	18.0952	-0.390341	0.317136	7.9547	0.15875	0.881976		15.0334	13.3667	20.756	23.5121	29.3623	17.7183	11.1559	24.3406	21.2684	19.9852	19.4338	10.5236	9.42117	11.8128	26.1562	13.9856	19.7868
Slc7a5	2.90085	-1.18898	0.869651	7.95697	0.158623	0.881976		3.00667	6.68334	5.18901	1.95934	2.17498	2.95304	4.64828	1.15907	0	2.39822	0.844949	7.51684	8.16502	0	2.61562	0	0
Racgap1	3.49867	0.0686628	0.748191	7.94419	0.159338	0.884721		1.00222	4.01	10.378	2.93902	1.08749	3.93739	1.85931	4.6363	5.3171	0.799406	0	5.26179	7.53694	5.36945	1.74375	1.27142	2.32786
Slc2a1	10.297	-0.0544615	0.458483	7.93383	0.15992	0.887424		22.0489	14.7033	3.45934	5.87803	8.69993	6.89044	19.5228	8.11352	12.761	3.19763	11.8293	12.7786	9.42117	10.7389	4.35937	10.1714	10.4754
Pgap1	9.04888	-0.28589	0.43058	7.92999	0.160136	0.888098		3.00667	9.35668	19.0264	7.83738	16.3124	4.92174	6.50759	5.79537	14.8879	11.1917	6.75959	7.51684	6.28078	8.59112	11.3344	6.3571	8.1475
Furin	26.2696	0.566036	0.269168	7.92206	0.160584	0.888474		25.0556	10.6933	22.4857	26.4511	16.3124	33.4678	34.3973	28.9768	20.205	20.7846	17.7439	36.0809	42.0812	28.995	31.3875	30.5141	20.9507
Mrpl15	10.4753	-0.303857	0.38578	7.92346	0.160505	0.888474		18.04	18.7134	6.91868	8.81705	16.3124	4.92174	8.3669	8.11352	6.38051	3.19763	12.6742	12.7786	10.0492	8.59112	7.84687	8.89994	17.4589
Ube2r2	27.1842	0.0583912	0.254749	7.92557	0.160386	0.888474		20.0445	18.7134	28.5395	37.2275	31.5373	27.5618	21.3821	22.0224	32.966	27.1798	27.8833	21.7989	21.9827	22.5517	42.7219	25.4284	32.59
Zfand3	25.2153	-0.405556	0.258048	7.92527	0.160403	0.888474		37.0823	30.7434	19.8912	22.5325	43.4997	26.5774	26.96	20.8633	19.1415	14.3893	25.3485	24.0539	21.9827	25.7734	16.5656	24.157	29.0982
Cbr2	1.55149	-0.142144	1.0998	7.92034	0.160681	0.888488		1.00222	0	5.18901	0.979672	0	3.93739	2.78897	1.15907	1.06342	0	0.844949	3.00674	2.51231	2.14778	1.74375	0	0
Fcgr2b	16.5937	-1.22083	0.363196	7.91465	0.161003	0.889742		23.0512	10.6933	37.1879	35.2682	34.7997	3.93739	11.1559	11.5907	13.8244	18.3863	14.3641	12.7786	12.5616	6.44334	5.23125	20.3427	10.4754
Fam149a	1.55621	0.589892	1.03545	7.91272	0.161112	0.889819		3.00667	1.33667	0.864834	0.979672	0	0.984348	2.78897	1.15907	0	2.39822	0	5.26179	2.51231	2.14778	1.74375	1.27142	0
Fads1	14.7733	-0.0176697	0.36826	7.91	0.161266	0.890147		20.0445	24.06	13.8374	11.7561	4.34997	22.64	14.8745	15.068	13.8244	5.59585	11.8293	20.2955	12.5616	18.2561	11.3344	20.3427	10.4754
Klhl6	6.3985	-0.244113	0.510635	7.90556	0.161518	0.891011		5.01112	2.67334	11.2428	8.81705	4.34997	11.8122	6.50759	3.47722	4.25368	7.19466	6.75959	9.02021	7.53694	1.07389	6.975	5.08568	6.98357
Tbpl1	8.32748	0.414411	0.443787	7.89868	0.161908	0.892641		8.0178	14.7033	2.5945	6.8577	5.43746	7.87479	6.50759	12.7498	7.44393	5.59585	8.44949	6.01348	13.1896	13.9606	5.23125	7.62852	9.31143
Ddx24	24.8709	0.160228	0.285658	7.89163	0.16231	0.893278		22.0489	10.6933	25.945	32.3292	21.7498	15.7496	30.6786	27.8178	38.2831	27.9792	26.1934	18.0404	15.0739	25.7734	27.9	35.5998	20.9507
Ptpn22	4.19649	0.441818	0.627058	7.89178	0.162302	0.893278		2.00445	0	4.32417	6.8577	9.78743	1.9687	1.85931	1.15907	5.3171	5.59585	1.6899	1.50337	3.76847	5.36945	4.35937	7.62852	8.1475
Rala	34.5495	0.368045	0.234181	7.89185	0.162298	0.893278		37.0823	29.4067	29.4044	23.5121	32.6248	22.64	43.6938	24.3406	42.5368	31.1769	44.7823	36.0809	40.197	37.5862	39.2344	24.157	48.885
Atxn7l3b	10.7701	-0.365647	0.388341	7.88797	0.162519	0.893901		9.02002	13.3667	11.2428	12.7357	11.9624	22.64	7.43725	8.11352	7.44393	5.59585	10.1394	15.0337	11.3054	10.7389	9.59062	5.08568	11.6393
Aoah	4.59426	-0.308712	0.648438	7.88266	0.162822	0.895044		1.00222	1.33667	8.64834	5.87803	10.8749	2.95304	6.50759	0	6.38051	3.99703	7.60454	2.25505	5.6527	2.14778	1.74375	7.62852	3.49178
Mfsd11	39.6358	0.203947	0.248961	7.87911	0.163025	0.895633		21.0467	21.3867	55.3494	49.9633	46.7621	37.4052	26.96	47.522	31.9026	40.7697	33.7979	36.0809	36.4285	33.2906	45.3375	59.7567	50.0489
Akap8l	8.14867	0.192559	0.454807	7.8753	0.163243	0.896307		9.02002	2.67334	7.78351	8.81705	6.52495	6.89044	9.29656	8.11352	7.44393	13.5899	10.9843	4.51011	6.28078	2.14778	8.71875	15.257	10.4754
Fes	27.775	-0.200752	0.264866	7.86452	0.163862	0.899011		13.0289	22.7234	41.5121	33.3088	32.6248	28.5461	19.5228	28.9768	32.966	39.1709	37.1777	25.5573	20.7266	26.8473	27.0281	20.3427	22.1146
Mapkapk5	8.89943	0.123118	0.447263	7.86338	0.163928	0.899011		13.0289	8.02001	7.78351	5.87803	2.17498	7.87479	16.7338	15.068	11.6976	10.3923	6.75959	6.01348	6.28078	13.9606	8.71875	5.08568	5.81964
Tceal8	18.3945	-0.616109	0.320124	7.86065	0.164085	0.899346		34.0756	38.7634	20.756	15.6748	15.2249	17.7183	20.4524	18.5452	12.761	11.9911	10.9843	16.5371	20.7266	10.7389	22.6687	7.62852	17.4589
Tlr2	24.664	0.262587	0.622708	7.85554	0.164379	0.900431		3.00667	4.01	17.2967	23.5121	31.5373	29.5304	100.403	22.0224	23.3952	23.9822	30.4182	3.75842	27.0074	7.51723	14.8219	27.9712	29.0982
Fnbp1	21.2352	-0.0635082	0.313027	7.85219	0.164572	0.900759		20.0445	49.4567	12.1077	20.5731	13.0499	21.6557	26.0304	20.8633	21.2684	15.9881	18.5889	15.0337	22.6108	26.8473	15.6937	19.0713	22.1146
Nars2	1.59493	2.09684	1.16474	7.8495	0.164727	0.900759		0	0	2.5945	0	0	0	0	4.6363	2.12684	0.799406	4.22474	1.50337	0.628078	3.22167	2.61562	1.27142	3.49178
Nsmf	1.75504	-1.58507	1.04226	7.84989	0.164705	0.900759		4.0089	1.33667	0.864834	3.91869	2.17498	3.93739	3.71862	2.31815	0	0.799406	0	0.751684	3.76847	1.07389	0	0	1.16393
Lss	3.80448	-0.451005	0.6505	7.8459	0.164935	0.90137		6.01335	6.68334	3.45934	3.91869	2.17498	5.90609	5.57794	5.79537	3.19026	0.799406	0	3.00674	5.02462	4.29556	5.23125	1.27142	2.32786
Trim59	2.77951	0.321741	0.876955	7.8427	0.165121	0.901857		3.00667	0	1.72967	8.81705	0	4.92174	3.71862	1.15907	3.19026	1.59881	0	4.51011	5.6527	4.29556	3.4875	0	1.16393
Rpl7l1	25.5455	-0.0973065	0.28223	7.83611	0.165502	0.9029		17.0378	22.7234	25.945	43.1056	22.8373	27.5618	27.8897	24.3406	10.6342	37.5721	27.0384	25.5573	19.4704	19.33	22.6687	27.9712	32.59
Rps2	127.508	3.6516	0.23814	7.83607	0.165504	0.9029		24.0534	20.05	12.1077	10.7764	7.61244	180.136	158.971	176.179	141.435	130.303	160.54	221.747	174.606	230.886	206.634	147.485	164.114
Hck	27.3535	-0.360451	0.304796	7.82924	0.165901	0.904537		23.0512	22.7234	20.756	41.1462	30.4498	27.5618	26.96	38.2494	45.727	27.1798	33.7979	10.5236	13.1896	17.1822	19.1812	25.4284	41.9014
Cyp4v3	28.0117	0.256323	0.241923	7.82652	0.166059	0.904872		29.0645	26.7334	27.6747	33.3088	27.1873	15.7496	18.5931	22.0224	26.5855	24.7816	27.0384	20.2955	24.495	33.2906	34.875	49.5854	34.9178
Adra1a	5.41588	0.283883	0.588614	7.81719	0.166603	0.907306		4.0089	2.67334	4.32417	5.87803	7.61244	0.984348	2.78897	3.47722	2.12684	14.3893	10.9843	7.51684	4.39655	4.29556	3.4875	3.81426	9.31143
Gns	144.359	-0.0857247	0.158743	7.80973	0.167038	0.908392		137.305	94.9034	206.695	189.077	180.524	116.153	110.629	136.771	144.625	127.905	110.688	150.337	140.689	131.015	174.375	162.742	139.671
Gstk1	3.35908	0.367722	0.820695	7.80714	0.16719	0.908392		0	0	3.45934	5.87803	2.17498	5.90609	2.78897	2.31815	8.50735	3.99703	5.06969	0.751684	0	4.29556	3.4875	3.81426	4.65571
Plxdc2	2.1417	-2.29169	1.10288	7.81146	0.166937	0.908392		8.0178	0	3.45934	1.95934	6.52495	1.9687	0.929656	0	0	0	7.60454	0	0	1.07389	0	2.54284	2.32786
Snd1	17.1703	-0.105737	0.303648	7.80787	0.167147	0.908392		16.0356	24.06	25.0802	14.6951	13.0499	15.7496	14.8745	22.0224	21.2684	11.9911	10.9843	15.7854	21.3547	23.6256	15.6937	13.9856	11.6393
Irf2	14.0004	-0.406374	0.357591	7.79981	0.167619	0.908764		11.0245	8.02001	19.0264	28.4105	14.1374	12.7965	11.1559	13.9089	22.3318	12.7905	14.3641	9.02021	9.42117	11.8128	17.4375	16.5285	5.81964
Jdp2	2.84133	-0.155352	0.785657	7.79815	0.167716	0.908764		3.00667	4.01	0.864834	1.95934	2.17498	4.92174	7.43725	1.15907	1.06342	3.99703	2.53485	3.75842	4.39655	2.14778	0	2.54284	2.32786
Phtf2	3.40219	0.115115	0.784522	7.79692	0.167789	0.908764		2.00445	6.68334	0.864834	5.87803	0	5.90609	2.78897	2.31815	6.38051	2.39822	1.6899	3.75842	1.25616	7.51723	0.871875	6.3571	1.16393
Rasal3	3.84826	0.829071	0.726098	7.79604	0.167841	0.908764		7.01557	0	6.91868	0	1.08749	3.93739	5.57794	1.15907	6.38051	2.39822	3.37979	6.01348	5.02462	3.22167	2.61562	2.54284	8.1475
Rpl13	321.122	0.0561517	0.127723	7.80337	0.16741	0.908764		342.761	399.664	323.448	274.308	290.36	290.383	320.731	307.155	258.411	298.978	302.492	377.346	364.913	405.93	367.931	261.912	272.359
Tomm70a	17.3975	-0.268779	0.309317	7.79611	0.167836	0.908764		35.0779	24.06	13.8374	13.7154	15.2249	13.7809	23.2414	17.3861	13.8244	13.5899	12.6742	18.0404	16.9581	20.4039	11.3344	13.9856	18.6229
Gtse1	2.60832	2.003	0.972575	7.77928	0.168827	0.91305		0	0	2.5945	0	1.08749	4.92174	3.71862	1.15907	3.19026	3.99703	0.844949	7.51684	1.88423	1.07389	6.10312	5.08568	1.16393
Mdp1	10.0502	0.433068	0.395931	7.7797	0.168802	0.91305		10.0222	5.34667	12.1077	12.7357	10.8749	6.89044	4.64828	2.31815	5.3171	7.19466	10.9843	6.76516	9.42117	11.8128	14.8219	13.9856	25.6064
Dhx40	5.14116	-0.353278	0.575805	7.77563	0.169043	0.913688		2.00445	5.34667	10.378	5.87803	3.26248	2.95304	7.43725	8.11352	9.57077	4.79644	3.37979	4.51011	1.88423	4.29556	8.71875	2.54284	2.32786
Gpr160	2.68776	0.2585	0.768848	7.77271	0.169215	0.914091		0	2.67334	6.05384	5.87803	1.08749	0.984348	0.929656	3.47722	4.25368	1.59881	1.6899	0	3.14039	4.29556	3.4875	3.81426	2.32786
Nbr1	18.3708	0.113119	0.324177	7.76328	0.169774	0.91643		11.0245	8.02001	21.6209	24.4918	19.5749	17.7183	13.0152	16.227	36.1562	26.3804	13.5192	16.5371	14.4458	20.4039	19.1812	16.5285	17.4589
Yars	8.65442	-0.456646	0.44452	7.7621	0.169843	0.91643		13.0289	4.01	8.64834	11.7561	8.69993	11.8122	15.8041	6.95444	3.19026	11.9911	6.75959	12.7786	9.42117	5.36945	6.10312	3.81426	6.98357
Amz1	8.54878	0.126466	0.477937	7.75872	0.170044	0.916985		11.0245	5.34667	2.5945	9.79672	11.9624	12.7965	12.0855	2.31815	2.12684	8.79347	14.3641	11.2753	9.42117	5.36945	11.3344	8.89994	5.81964
Gm36738	3.64967	1.2005	0.725295	7.75511	0.170258	0.917514		0	0	7.78351	3.91869	1.08749	2.95304	0.929656	3.47722	5.3171	4.79644	3.37979	4.51011	3.76847	5.36945	8.71875	2.54284	3.49178
Mrpl3	13.1268	-0.431585	0.362741	7.75377	0.170338	0.917514		16.0356	13.3667	12.1077	19.5934	10.8749	18.7026	16.7338	8.11352	7.44393	16.7875	11.8293	21.0472	15.702	9.66501	9.59062	5.08568	10.4754
Tbc1d9b	14.7744	0.481517	0.349989	7.72303	0.172175	0.926877		8.0178	6.68334	16.4319	13.7154	10.8749	13.7809	14.8745	11.5907	24.4586	21.584	18.5889	17.2887	16.33	9.66501	24.4125	8.89994	13.9671
Mcm2	5.02053	-1.07183	0.596824	7.71314	0.17277	0.929545		4.0089	24.06	2.5945	5.87803	6.52495	3.93739	4.64828	3.47722	3.19026	1.59881	1.6899	6.76516	3.14039	5.36945	3.4875	3.81426	1.16393
Pfn1	390.427	-0.170501	0.126172	7.71128	0.172882	0.929611		502.114	498.577	315.665	370.316	412.159	454.769	419.275	392.926	323.279	343.745	357.413	363.064	378.731	354.384	335.672	404.311	410.867
Rpl32	383.808	0.234443	0.109092	7.70725	0.173125	0.930351		343.763	413.03	363.23	322.312	342.56	346.491	356.988	416.108	374.324	338.149	375.157	461.534	422.697	502.581	428.962	383.969	332.883
Rtn4ip1	2.16286	-1.61199	0.935081	7.70571	0.173218	0.930351		3.00667	6.68334	1.72967	0	6.52495	4.92174	0.929656	0	2.12684	0.799406	1.6899	3.00674	1.25616	3.22167	0.871875	0	0
Leo1	4.38167	-0.426462	0.591616	7.6944	0.173901	0.932418		11.0245	5.34667	3.45934	3.91869	6.52495	0.984348	3.71862	1.15907	1.06342	3.19763	6.75959	4.51011	3.76847	2.14778	2.61562	3.81426	10.4754
Nr1d2	10.7396	0.10016	0.416453	7.69451	0.173895	0.932418		7.01557	5.34667	11.2428	16.6544	9.78743	10.8278	6.50759	4.6363	26.5855	12.7905	11.8293	6.76516	10.0492	10.7389	12.2062	11.4428	8.1475
Rabac1	80.2527	0.228695	0.189265	7.69465	0.173886	0.932418		74.1646	58.8134	83.8889	74.4551	57.6371	69.8887	72.5132	99.6804	82.9467	100.725	105.619	60.1348	55.2709	80.5418	78.4687	110.614	98.9339
Ldlrap1	34.2132	0.129466	0.25351	7.68973	0.174185	0.932868		54.1201	33.4167	26.8099	24.4918	28.2748	46.2644	25.1007	26.6587	23.3952	27.9792	30.4182	44.3494	43.3374	28.995	24.4125	47.0425	46.5571
Nipal3	5.10091	0.255878	0.562567	7.68996	0.17417	0.932868		2.00445	4.01	9.51318	6.8577	2.17498	2.95304	6.50759	1.15907	8.50735	5.59585	4.22474	6.01348	3.76847	3.22167	10.4625	5.08568	4.65571
1110046J04Rik	1.90973	-1.36738	0.911813	7.68275	0.174609	0.934606		2.00445	2.67334	3.45934	6.8577	3.26248	0	0	0	3.19026	1.59881	0.844949	0.751684	0.628078	0	3.4875	2.54284	1.16393
Plekhn1	7.50484	0.304645	0.505431	7.67694	0.174962	0.935962		2.00445	4.01	12.1077	6.8577	5.43746	3.93739	6.50759	11.5907	15.9513	8.79347	8.44949	7.51684	3.14039	5.36945	6.10312	13.9856	5.81964
Lamtor3	28.6354	-0.0169063	0.262747	7.67466	0.175101	0.936169		48.1068	30.7434	27.6747	24.4918	18.4874	28.5461	27.8897	22.0224	20.205	19.1858	33.7979	42.0943	39.5689	30.0689	22.6687	27.9712	23.2786
AI480526	1.46128	-0.696908	1.09872	7.6657	0.175647	0.937618		0	2.67334	3.45934	2.93902	0	1.9687	1.85931	0	3.19026	0.799406	0	3.00674	1.25616	1.07389	2.61562	0	0
Ifngr1	35.7899	0.45202	0.241569	7.66381	0.175763	0.937618		25.0556	25.3967	19.8912	23.5121	32.6248	43.3113	54.8497	35.9313	40.4099	48.7638	55.7666	21.7989	28.8916	30.0689	28.7719	44.4997	48.885
Ppm1k	2.15188	-0.50908	0.930904	7.66317	0.175802	0.937618		1.00222	0	4.32417	7.83738	1.08749	0.984348	0.929656	1.15907	2.12684	3.19763	3.37979	1.50337	0	2.14778	4.35937	2.54284	0
Slc29a3	22.7053	-0.563601	0.310232	7.66202	0.175872	0.937618		27.0601	13.3667	31.134	39.1869	36.9747	19.687	10.2262	20.8633	31.9026	23.1828	10.1394	21.0472	13.1896	13.9606	24.4125	22.8856	26.7704
Stra6l	2.53624	0.00300425	0.780734	7.66792	0.175512	0.937618		5.01112	5.34667	0.864834	5.87803	0	0	2.78897	3.47722	1.06342	1.59881	1.6899	0.751684	1.88423	4.29556	3.4875	3.81426	1.16393
Eif1b	18.6903	-0.40511	0.32635	7.65916	0.176047	0.938017		27.0601	32.08	13.8374	18.6138	27.1873	11.8122	14.8745	12.7498	10.6342	12.7905	30.4182	22.5505	25.7512	17.1822	9.59062	17.7999	12.8032
Dusp1	13.6121	0.306781	0.394597	7.65429	0.176346	0.938541		13.0289	9.35668	2.5945	10.7764	17.3999	9.84348	26.0304	15.068	23.3952	18.3863	16.054	4.51011	11.9335	11.8128	12.2062	12.7142	16.295
Itfg1	21.6037	0.086646	0.278389	7.65531	0.176283	0.938541		18.04	21.3867	29.4044	26.4511	11.9624	19.687	20.4524	16.227	29.7757	20.7846	16.899	22.5505	16.33	17.1822	28.7719	29.2427	22.1146
Agtpbp1	4.12877	0.108403	0.623481	7.64778	0.176746	0.939952		3.00667	8.02001	4.32417	2.93902	3.26248	0.984348	2.78897	8.11352	0	4.79644	5.91464	3.00674	3.14039	8.59112	2.61562	6.3571	2.32786
Cep350	6.09753	0.000956037	0.575801	7.64103	0.17716	0.939952		8.0178	0	12.1077	5.87803	4.34997	4.92174	3.71862	6.95444	11.6976	6.39525	2.53485	7.51684	8.79309	5.36945	5.23125	10.1714	0
Dnajb9	16.3083	0.489207	0.352627	7.64227	0.177084	0.939952		14.0311	16.04	7.78351	14.6951	8.69993	16.7339	16.7338	27.8178	11.6976	23.1828	17.7439	11.2753	8.16502	31.1428	20.0531	13.9856	17.4589
Rab31	36.25	0.104726	0.226024	7.64017	0.177213	0.939952		34.0756	46.7834	46.7011	25.4715	28.2748	39.3739	28.8193	34.7722	31.9026	27.1798	28.7283	52.6179	49.6182	44.0295	35.7469	33.0569	29.0982
Rsl24d1	15.7498	-0.323508	0.345474	7.6408	0.177175	0.939952		17.0378	20.05	14.7022	16.6544	15.2249	27.5618	9.29656	19.7043	14.8879	7.99406	13.5192	18.0404	15.702	16.1084	10.4625	6.3571	24.4425
Tmem208	21.3967	0.0629359	0.297953	7.6415	0.177131	0.939952		26.0578	32.08	19.8912	14.6951	13.0499	17.7183	31.6083	28.9768	10.6342	20.7846	20.2788	21.0472	26.3793	21.4778	18.3094	13.9856	26.7704
Tasp1	1.7232	-1.0031	0.989047	7.63482	0.177543	0.94117		5.01112	6.68334	0.864834	0.979672	2.17498	0	0.929656	0	0	0	3.37979	1.50337	1.25616	2.14778	0.871875	0	3.49178
Nktr	4.60314	-0.24589	0.602189	7.63218	0.177706	0.9415		6.01335	4.01	5.18901	8.81705	3.26248	1.9687	3.71862	2.31815	3.19026	11.1917	3.37979	3.75842	7.53694	1.07389	7.84687	3.81426	1.16393
Clk2	5.08268	-0.0754883	0.563936	7.63049	0.17781	0.941519		6.01335	1.33667	9.51318	5.87803	6.52495	1.9687	5.57794	3.47722	5.3171	4.79644	1.6899	6.76516	6.90886	0	6.975	10.1714	3.49178
Hccs	6.16474	0.230146	0.551073	7.62218	0.178324	0.94238		6.01335	13.3667	2.5945	3.91869	3.26248	6.89044	9.29656	6.95444	3.19026	6.39525	5.91464	1.50337	8.16502	11.8128	6.10312	1.27142	8.1475
Mfn1	4.07609	-0.542337	0.658947	7.62136	0.178375	0.94238		3.00667	10.6933	5.18901	4.89836	1.08749	2.95304	1.85931	6.95444	3.19026	7.19466	2.53485	3.00674	0	4.29556	5.23125	2.54284	4.65571
Rab18	28.9581	0.082376	0.267822	7.62298	0.178275	0.94238		43.0957	26.7334	26.8099	23.5121	21.7498	35.4365	43.6938	18.5452	17.0147	27.1798	21.9687	30.8191	30.7758	35.4384	20.0531	36.8712	32.59
Tpt1	1025.54	0.377738	0.114414	7.62384	0.178221	0.94238		956.122	832.744	964.29	897.38	861.293	1116.25	1005.89	1069.83	919.858	729.858	862.693	1208.71	1192.09	1376.73	1379.31	1045.11	1016.11
Pygl	9.6956	-0.0630622	0.424226	7.61497	0.178771	0.943414		11.0245	4.01	19.8912	10.7764	9.78743	3.93739	8.3669	5.79537	10.6342	5.59585	8.44949	18.7921	10.0492	3.22167	10.4625	8.89994	15.1311
Sirt7	16.5959	0.712582	0.333706	7.61171	0.178974	0.943414		5.01112	12.03	17.2967	21.5528	11.9624	7.87479	12.0855	12.7498	20.205	18.3863	20.2788	20.2955	16.33	18.2561	16.5656	27.9712	23.2786
Tle6	2.66005	-0.130186	0.791026	7.61274	0.178909	0.943414		2.00445	1.33667	3.45934	0.979672	10.8749	0	1.85931	0	5.3171	2.39822	1.6899	1.50337	1.25616	2.14778	4.35937	2.54284	3.49178
Tpgs1	10.6329	0.488204	0.409052	7.6121	0.178949	0.943414		6.01335	6.68334	13.8374	11.7561	7.61244	8.85913	1.85931	16.227	12.761	9.59288	11.8293	7.51684	8.79309	9.66501	14.8219	17.7999	15.1311
Slc16a7	4.59707	-1.65935	0.597681	7.59844	0.179799	0.947231		6.01335	4.01	14.7022	8.81705	8.69993	2.95304	0.929656	1.15907	5.3171	3.19763	5.06969	3.75842	1.25616	1.07389	2.61562	5.08568	3.49178
Pkn1	31.5237	0.0830365	0.26593	7.5954	0.179989	0.947698		15.0334	18.7134	36.323	46.0446	41.3247	18.7026	27.8897	38.2494	40.4099	33.5751	34.6429	32.3224	25.1231	26.8473	37.4906	31.7855	31.4261
Lims2	1.46403	0.468506	1.10804	7.59163	0.180225	0.948406		1.00222	0	1.72967	0	2.17498	1.9687	0	0	5.3171	1.59881	2.53485	2.25505	1.25616	0	2.61562	1.27142	1.16393
Ahsa2	5.06561	-0.977205	0.563893	7.58113	0.180881	0.948454		4.0089	14.7033	7.78351	3.91869	5.43746	4.92174	2.78897	4.6363	6.38051	2.39822	6.75959	5.26179	2.51231	7.51723	3.4875	1.27142	2.32786
Arhgap6	4.7988	0.328789	0.618974	7.58875	0.180404	0.948454		3.00667	2.67334	1.72967	5.87803	7.61244	3.93739	4.64828	0	5.3171	7.19466	9.29444	7.51684	6.90886	1.07389	6.10312	6.3571	2.32786
Cnot10	4.6069	0.0593831	0.614998	7.58537	0.180616	0.948454		7.01557	0	3.45934	6.8577	3.26248	9.84348	5.57794	1.15907	7.44393	4.79644	1.6899	5.26179	6.28078	4.29556	5.23125	3.81426	2.32786
Pdlim5	10.8831	0.198534	0.435985	7.58472	0.180657	0.948454		8.0178	4.01	19.0264	14.6951	4.34997	13.7809	8.3669	10.4317	15.9513	7.99406	7.60454	15.7854	21.3547	5.36945	11.3344	7.62852	9.31143
Pdlim7	3.66014	0.802019	0.804193	7.57854	0.181044	0.948454		4.0089	1.33667	0	2.93902	1.08749	10.8278	8.3669	1.15907	3.19026	3.19763	5.06969	3.00674	8.79309	4.29556	2.61562	0	2.32786
Sesn3	3.35333	0.0046615	0.71338	7.58164	0.180849	0.948454		3.00667	2.67334	6.05384	2.93902	1.08749	2.95304	0.929656	2.31815	5.3171	4.79644	3.37979	5.26179	1.88423	1.07389	6.975	6.3571	0
Slc38a2	12.4743	-0.345259	0.429003	7.57993	0.180957	0.948454		20.0445	9.35668	17.2967	9.79672	7.61244	14.7652	14.8745	10.4317	8.50735	7.19466	26.1934	12.027	22.6108	12.8867	5.23125	5.08568	8.1475
Zfp672	3.50232	0.529137	0.662868	7.5871	0.180508	0.948454		3.00667	2.67334	1.72967	1.95934	6.52495	0	2.78897	6.95444	2.12684	4.79644	5.06969	1.50337	5.02462	4.29556	2.61562	3.81426	4.65571
Cab39l	8.43978	0.252757	0.474427	7.57525	0.18125	0.949005		2.00445	5.34667	13.8374	2.93902	10.8749	8.85913	4.64828	17.3861	11.6976	11.1917	8.44949	6.76516	5.02462	9.66501	7.84687	7.62852	9.31143
Ipo7	19.7475	-0.333092	0.297438	7.5735	0.18136	0.949051		27.0601	24.06	16.4319	13.7154	19.5749	32.4835	24.1711	22.0224	22.3318	15.1887	16.054	18.7921	19.4704	22.5517	10.4625	12.7142	18.6229
Sf1	27.3014	-0.177757	0.250592	7.56514	0.181886	0.951272		34.0756	32.08	19.8912	26.4511	41.3247	21.6557	31.6083	22.0224	14.8879	25.581	31.2631	35.3292	27.6354	25.7734	22.6687	21.6141	30.2621
Hnmt	5.1626	0.549843	0.581484	7.55881	0.182285	0.951639		7.01557	1.33667	5.18901	2.93902	4.34997	1.9687	4.64828	4.6363	7.44393	3.19763	8.44949	3.75842	2.51231	2.14778	7.84687	6.3571	13.9671
Il18	5.57398	-0.120292	0.592878	7.55597	0.182464	0.951639		2.00445	1.33667	5.18901	19.5934	7.61244	1.9687	1.85931	4.6363	10.6342	3.19763	6.75959	3.75842	4.39655	4.29556	5.23125	7.62852	4.65571
Ivd	9.16253	0.0223233	0.418034	7.55715	0.18239	0.951639		7.01557	22.7234	7.78351	6.8577	6.52495	7.87479	8.3669	11.5907	7.44393	4.79644	8.44949	7.51684	10.6773	12.8867	13.0781	6.3571	5.81964
Myo1b	1.95885	-0.610461	0.951338	7.55916	0.182263	0.951639		3.00667	4.01	0.864834	0	3.26248	1.9687	5.57794	3.47722	0	1.59881	0.844949	1.50337	2.51231	1.07389	0	1.27142	2.32786
Txndc11	5.76316	-0.129046	0.505162	7.56234	0.182063	0.951639		6.01335	14.7033	4.32417	3.91869	4.34997	5.90609	4.64828	6.95444	4.25368	4.79644	2.53485	6.01348	6.28078	10.7389	5.23125	3.81426	3.49178
Gadd45gip1	10.8444	0.271107	0.396854	7.55406	0.182585	0.95174		11.0245	16.04	3.45934	9.79672	11.9624	7.87479	9.29656	11.5907	3.19026	17.5869	12.6742	12.7786	11.3054	12.8867	9.59062	13.9856	9.31143
Gnpda1	43.3209	-0.0349145	0.233315	7.548	0.182968	0.952277		31.069	22.7234	66.5922	58.7803	60.8995	37.4052	37.1862	31.295	43.6002	36.7727	32.108	51.1145	43.3374	44.0295	62.775	40.6854	36.0818
Lair1	36.6611	-0.356389	0.23156	7.546	0.183095	0.952277		26.0578	44.11	36.323	57.8006	46.7621	32.4835	26.96	47.522	46.7904	36.7727	31.2631	27.0606	24.495	37.5862	38.3625	27.9712	34.9178
Snu13	26.473	-0.25771	0.281965	7.54648	0.183065	0.952277		34.0756	37.4267	22.4857	16.6544	23.9248	37.4052	34.3973	25.4996	22.3318	27.9792	29.5732	20.2955	26.3793	27.9211	17.4375	10.1714	36.0818
Tex10	4.71518	-1.04023	0.612353	7.54713	0.183024	0.952277		8.0178	12.03	3.45934	2.93902	6.52495	4.92174	6.50759	5.79537	2.12684	3.99703	1.6899	4.51011	3.76847	5.36945	0.871875	7.62852	0
Cyfip1	25.814	-0.423797	0.26141	7.52471	0.184449	0.953449		34.0756	48.12	18.1615	22.5325	32.6248	21.6557	29.749	26.6587	24.4586	21.584	21.9687	27.0606	23.2389	30.0689	15.6937	19.0713	22.1146
Dcps	6.48844	0.440804	0.536772	7.5269	0.184309	0.953449		3.00667	13.3667	4.32417	7.83738	2.17498	2.95304	8.3669	10.4317	1.06342	6.39525	7.60454	5.26179	6.90886	8.59112	6.975	12.7142	2.32786
Flrt2	8.20467	-0.00770543	0.450716	7.5303	0.184092	0.953449		11.0245	10.6933	8.64834	9.79672	3.26248	7.87479	1.85931	15.068	8.50735	3.99703	4.22474	9.02021	7.53694	15.0345	9.59062	6.3571	6.98357
Lrrc8c	2.60726	-0.726977	0.890918	7.53325	0.183904	0.953449		3.00667	2.67334	2.5945	0	4.34997	8.85913	7.43725	3.47722	1.06342	0	0.844949	0.751684	3.14039	1.07389	2.61562	1.27142	1.16393
Peg13	4.17827	1.26131	0.751655	7.53268	0.183941	0.953449		0	1.33667	0.864834	5.87803	2.17498	6.89044	7.43725	1.15907	7.44393	3.99703	5.06969	2.25505	6.28078	0	4.35937	8.89994	6.98357
Plekhg3	5.8109	-0.905345	0.533101	7.52356	0.184522	0.953449		7.01557	5.34667	7.78351	12.7357	9.78743	0.984348	4.64828	2.31815	8.50735	10.3923	4.22474	4.51011	3.14039	1.07389	7.84687	3.81426	4.65571
Sap18b	26.2276	-0.147711	0.269863	7.52531	0.18441	0.953449		29.0645	40.1	18.1615	21.5528	29.3623	27.5618	16.7338	40.5676	21.2684	30.3774	26.1934	20.2955	30.1477	28.995	16.5656	27.9712	20.9507
Soat1	102.947	0.129547	0.161864	7.52635	0.184344	0.953449		107.238	101.587	144.427	91.1095	92.4368	67.92	79.9504	96.2031	103.152	89.5335	101.394	92.4572	107.401	99.8718	128.166	143.67	103.59
Sugp2	1.71616	-1.79924	1.14905	7.52862	0.184199	0.953449		5.01112	1.33667	0.864834	0.979672	2.17498	0.984348	5.57794	0	3.19026	1.59881	1.6899	4.51011	1.25616	0	0	0	0
Tbc1d13	25.2851	0.0884513	0.270829	7.52976	0.184127	0.953449		14.0311	18.7134	27.6747	29.3902	27.1873	26.5774	25.1007	30.1359	38.2831	26.3804	19.4338	18.7921	16.9581	24.6995	36.6187	25.4284	24.4425
Tmem71	3.54864	0.569991	0.760222	7.53658	0.183693	0.953449		1.00222	2.67334	1.72967	3.91869	3.26248	4.92174	1.85931	4.6363	1.06342	7.19466	3.37979	2.25505	0.628078	0	6.975	10.1714	4.65571
Ube2s	32.0833	-0.0177378	0.238647	7.52325	0.184542	0.953449		49.109	36.09	38.9175	21.5528	23.9248	32.4835	31.6083	26.6587	25.5221	24.7816	30.4182	37.5842	45.8497	37.5862	29.6437	29.2427	24.4425
Cnst	1.70817	0.0295642	1.12252	7.52022	0.184735	0.953451		1.00222	2.67334	0	2.93902	1.08749	0	0	1.15907	6.38051	2.39822	1.6899	0	1.25616	3.22167	5.23125	0	0
Dis3l2	3.3417	-0.602164	0.686853	7.52005	0.184746	0.953451		3.00667	4.01	2.5945	5.87803	3.26248	4.92174	3.71862	3.47722	1.06342	4.79644	0.844949	7.51684	3.14039	2.14778	2.61562	3.81426	0
Plpbp	13.0575	-0.600978	0.346511	7.51389	0.185139	0.954955		31.069	14.7033	19.8912	10.7764	16.3124	10.8278	9.29656	11.5907	11.6976	4.79644	5.91464	12.7786	18.2143	15.0345	9.59062	10.1714	9.31143
Abhd16a	15.6874	0.181863	0.327991	7.51053	0.185355	0.955487		13.0289	5.34667	17.2967	16.6544	26.0998	11.8122	13.0152	16.227	13.8244	16.7875	17.7439	9.7719	18.8423	10.7389	18.3094	19.0713	22.1146
Smpdl3a	102.63	0.684879	0.163966	7.5091	0.185446	0.955487		75.1668	85.5467	84.7538	71.5161	84.8244	90.56	77.1614	79.9761	115.913	100.725	123.363	96.9673	105.517	150.345	156.937	122.056	123.376
Nicn1	1.6058	1.50266	1.09124	7.50647	0.185614	0.955827		0	0	1.72967	0	2.17498	1.9687	0	2.31815	1.06342	0.799406	4.22474	1.50337	0.628078	1.07389	2.61562	2.54284	4.65571
Acvrl1	7.38178	0.742165	0.496322	7.50237	0.185877	0.956248		6.01335	4.01	1.72967	9.79672	4.34997	7.87479	4.64828	8.11352	5.3171	15.1887	9.29444	4.51011	5.02462	11.8128	6.10312	8.89994	12.8032
Ndufab1	35.2264	0.0577872	0.221133	7.50202	0.1859	0.956248		39.0868	34.7534	30.2692	29.3902	36.9747	28.5461	42.7642	42.8857	40.4099	24.7816	40.5575	31.5707	38.3128	42.9556	33.1312	22.8856	39.5736
Hprt	49.9156	-0.188186	0.193916	7.49695	0.186226	0.956348		68.1513	61.4867	45.8362	37.2275	54.3746	60.0452	56.709	47.522	47.8539	36.7727	44.7823	53.3696	54.0147	46.1773	51.4406	43.2283	39.5736
Mak16	7.72983	-0.243967	0.49035	7.49782	0.18617	0.956348		14.0311	6.68334	5.18901	8.81705	2.17498	14.7652	13.0152	8.11352	4.25368	7.99406	7.60454	3.75842	8.79309	6.44334	2.61562	10.1714	6.98357
Riok3	39.273	0.132548	0.232643	7.50007	0.186025	0.956348		45.1001	32.08	22.4857	31.3495	33.7122	56.1078	61.3573	39.4085	47.8539	32.7757	38.8676	45.1011	39.5689	48.3251	27.9	33.0569	32.59
Homer3	17.0228	0.591627	0.326137	7.49193	0.186549	0.957094		16.0356	20.05	11.2428	8.81705	10.8749	16.7339	19.5228	22.0224	11.6976	15.9881	9.29444	30.0674	21.3547	19.33	19.1812	26.6998	10.4754
Itpr3	5.65496	-0.529933	0.55773	7.48993	0.186678	0.957094		6.01335	8.02001	3.45934	6.8577	2.17498	12.7965	7.43725	6.95444	6.38051	3.99703	5.06969	9.7719	5.02462	2.14778	2.61562	5.08568	2.32786
Mesd	15.9906	-0.422523	0.328	7.49097	0.186611	0.957094		12.0267	17.3767	20.756	17.6341	16.3124	25.5931	12.0855	17.3861	14.8879	20.7846	11.8293	19.5438	9.42117	10.7389	8.71875	21.6141	15.1311
Gna12	33.6546	-0.222649	0.243619	7.48815	0.186792	0.957158		31.069	25.3967	40.6472	53.882	39.1497	35.4365	26.96	31.295	29.7757	28.7786	30.4182	30.8191	30.1477	18.2561	37.4906	54.671	27.9343
Pank1	1.91532	0.374174	0.921995	7.4863	0.186911	0.957244		3.00667	4.01	1.72967	0	1.08749	0	0.929656	2.31815	1.06342	1.59881	5.06969	0	2.51231	2.14778	3.4875	1.27142	2.32786
Acss1	4.83965	-1.18446	0.561778	7.4736	0.187733	0.958221		8.0178	5.34667	8.64834	6.8577	10.8749	1.9687	2.78897	1.15907	4.25368	6.39525	5.91464	0.751684	1.88423	2.14778	4.35937	5.08568	5.81964
Ctsz	447.2	0.0109644	0.109236	7.47414	0.187697	0.958221		444.988	414.367	513.712	509.429	445.872	322.866	378.37	469.425	479.602	458.859	430.924	436.729	409.507	467.142	498.712	455.168	466.735
Dusp7	24.4498	-0.0815969	0.269846	7.47663	0.187536	0.958221		22.0489	26.7334	24.2154	29.3902	18.4874	34.4522	25.1007	30.1359	15.9513	27.1798	15.2091	27.0606	21.9827	20.4039	18.3094	36.8712	22.1146
Gm10134	2.98108	-1.26996	0.856065	7.47227	0.187818	0.958221		0	2.67334	3.45934	6.8577	5.43746	1.9687	3.71862	2.31815	8.50735	4.79644	2.53485	0	0.628078	0	1.74375	2.54284	3.49178
Hnrnpr	9.83681	-0.657646	0.416615	7.47509	0.187636	0.958221		13.0289	21.3867	8.64834	7.83738	8.69993	17.7183	8.3669	9.27259	8.50735	5.59585	9.29444	7.51684	6.90886	12.8867	6.10312	3.81426	11.6393
Pomk	2.73437	0.358246	0.817724	7.47691	0.187518	0.958221		0	1.33667	3.45934	2.93902	4.34997	6.89044	0	0	4.25368	2.39822	2.53485	3.00674	1.88423	3.22167	5.23125	3.81426	1.16393
Tmem168	15.0823	-0.519678	0.342259	7.47604	0.187574	0.958221		13.0289	13.3667	14.7022	15.6748	36.9747	14.7652	13.0152	16.227	9.57077	17.5869	16.899	11.2753	12.5616	6.44334	13.0781	11.4428	19.7868
Camkk2	10.2928	-0.591671	0.419578	7.46224	0.188469	0.958806		4.0089	12.03	13.8374	16.6544	16.3124	8.85913	10.2262	11.5907	11.6976	5.59585	15.2091	5.26179	5.02462	7.51723	12.2062	3.81426	15.1311
Exoc4	12.5643	-0.0157366	0.402449	7.46104	0.188547	0.958806		9.02002	0	16.4319	16.6544	16.3124	18.7026	13.0152	11.5907	17.0147	15.1887	9.29444	15.0337	16.33	6.44334	13.0781	10.1714	9.31143
Fam122b	1.69821	0.817749	1.00403	7.46225	0.188468	0.958806		0	2.67334	0.864834	3.91869	0	2.95304	0	1.15907	2.12684	1.59881	0	1.50337	1.25616	3.22167	2.61562	3.81426	1.16393
Fbxo6	15.796	0.0656341	0.357472	7.46194	0.188489	0.958806		7.01557	9.35668	13.8374	18.6138	22.8373	12.7965	12.0855	13.9089	34.0294	23.1828	17.7439	13.5303	10.0492	16.1084	12.2062	11.4428	19.7868
Gm10419	5.09186	-1.52339	0.620811	7.46386	0.188364	0.958806		3.00667	4.01	13.8374	9.79672	16.3124	1.9687	1.85931	2.31815	11.6976	3.19763	0.844949	3.75842	1.88423	2.14778	2.61562	3.81426	3.49178
Rpl5	154.957	-0.15632	0.157665	7.46323	0.188405	0.958806		184.409	171.093	157.4	128.337	183.786	170.292	166.408	132.134	131.864	138.297	152.091	175.142	163.928	200.817	158.681	105.528	114.065
Asah1	90.461	0.19678	0.169394	7.45056	0.189229	0.959313		82.1824	60.1501	124.536	81.3128	89.1743	82.6853	85.5283	85.7715	95.7077	77.5424	81.1151	83.437	81.6502	90.2068	119.447	120.785	96.606
Mmp13	12.8707	-0.672548	0.425419	7.45773	0.188762	0.959313		8.0178	13.3667	19.0264	26.4511	18.4874	5.90609	7.43725	10.4317	30.8392	16.7875	5.91464	8.26853	11.9335	5.36945	6.10312	13.9856	10.4754
Nop16	5.95491	-0.466255	0.563293	7.45344	0.189041	0.959313		13.0289	13.3667	1.72967	1.95934	4.34997	7.87479	6.50759	8.11352	6.38051	3.99703	7.60454	3.75842	8.16502	4.29556	5.23125	2.54284	2.32786
Psmg3	6.6401	-0.0395243	0.491715	7.45065	0.189223	0.959313		12.0267	6.68334	3.45934	5.87803	4.34997	6.89044	13.0152	10.4317	5.3171	4.79644	3.37979	4.51011	6.90886	8.59112	4.35937	7.62852	4.65571
Rnase4	31.7994	0.0543498	0.330819	7.45007	0.189261	0.959313		19.0423	12.03	44.9714	39.1869	29.3623	59.0609	38.1159	26.6587	19.1415	29.578	21.9687	41.3426	40.8251	39.7339	34.875	33.0569	11.6393
Wbp4	11.7439	0.46352	0.409092	7.45357	0.189033	0.959313		20.0445	10.6933	5.18901	5.87803	11.9624	2.95304	18.5931	12.7498	8.50735	10.3923	12.6742	15.7854	11.9335	15.0345	6.975	13.9856	16.295
Slc25a22	8.57493	-0.667858	0.456401	7.44734	0.189439	0.959696		4.0089	18.7134	8.64834	7.83738	11.9624	5.90609	8.3669	13.9089	14.8879	9.59288	5.91464	5.26179	3.76847	9.66501	6.10312	8.89994	2.32786
Gm23547	4.83811	0.767703	0.573459	7.44185	0.189798	0.959953		2.00445	1.33667	5.18901	3.91869	5.43746	2.95304	3.71862	5.79537	6.38051	3.99703	8.44949	1.50337	5.02462	4.29556	7.84687	5.08568	9.31143
Gorasp1	6.89772	0.161861	0.526376	7.44322	0.189708	0.959953		1.00222	10.6933	9.51318	9.79672	2.17498	6.89044	8.3669	11.5907	9.57077	7.19466	0.844949	6.01348	7.53694	8.59112	7.84687	3.81426	5.81964
Ncbp2	15.273	0.0105344	0.351084	7.44202	0.189787	0.959953		18.04	20.05	19.8912	14.6951	3.26248	12.7965	19.5228	20.8633	12.761	15.1887	13.5192	11.2753	11.9335	26.8473	12.2062	13.9856	12.8032
2610002M06Rik	4.57688	0.305059	0.59738	7.44021	0.189905	0.95998		1.00222	4.01	6.91868	6.8577	3.26248	4.92174	1.85931	3.47722	8.50735	3.99703	2.53485	1.50337	3.14039	8.59112	6.10312	7.62852	3.49178
Nbeal2	5.3934	0.168029	0.567515	7.43575	0.190197	0.960935		2.00445	4.01	3.45934	8.81705	7.61244	3.93739	5.57794	3.47722	5.3171	7.19466	5.91464	4.51011	3.14039	0	8.71875	6.3571	11.6393
Foxj2	6.18571	0.440425	0.534571	7.43123	0.190493	0.961396		4.0089	2.67334	1.72967	6.8577	6.52495	9.84348	7.43725	3.47722	6.38051	6.39525	13.5192	5.26179	4.39655	4.29556	4.35937	6.3571	11.6393
Rapgef5	6.16391	0.855037	0.600575	7.43251	0.190409	0.961396		3.00667	4.01	1.72967	2.93902	2.17498	15.7496	10.2262	12.7498	6.38051	3.99703	7.60454	6.76516	10.0492	5.36945	2.61562	1.27142	8.1475
Hmmr	1.79927	-0.743692	1.12299	7.42368	0.190989	0.963377		0	5.34667	6.91868	0	1.08749	2.95304	0	2.31815	1.06342	0.799406	0	3.75842	4.39655	1.07389	0.871875	0	0
Gmfg	24.8223	0.112644	0.342175	7.42019	0.191218	0.964016		13.0289	4.01	33.7285	27.4308	30.4498	32.4835	34.3973	25.4996	23.3952	26.3804	19.4338	41.3426	29.5197	15.0345	25.2844	25.4284	15.1311
Cyp2j6	2.39733	0.407091	0.849824	7.41635	0.191471	0.964203		1.00222	0	4.32417	3.91869	1.08749	1.9687	0.929656	2.31815	4.25368	2.39822	1.6899	3.00674	0.628078	0	3.4875	5.08568	4.65571
Fkrp	7.16903	0.0286382	0.496086	7.41493	0.191564	0.964203		14.0311	9.35668	2.5945	7.83738	3.26248	12.7965	7.43725	6.95444	3.19026	7.19466	2.53485	5.26179	8.16502	11.8128	6.10312	6.3571	6.98357
Sec61a1	35.7617	-0.306008	0.216913	7.41641	0.191467	0.964203		34.0756	58.8134	40.6472	34.2885	34.7997	35.4365	33.4676	48.6811	29.7757	35.1739	27.8833	33.0741	31.4039	40.8078	31.3875	27.9712	30.2621
Nfya	23.7509	-0.113271	0.269465	7.41214	0.191748	0.964612		30.0667	28.07	25.0802	21.5528	18.4874	29.5304	20.4524	30.1359	12.761	26.3804	15.2091	31.5707	27.6354	27.9211	20.0531	19.0713	19.7868
Fkbp15	27.7899	0.100874	0.260452	7.4091	0.191949	0.964785		24.0534	20.05	36.323	38.2072	19.5749	30.5148	30.6786	18.5452	36.1562	20.7846	21.1237	22.5505	27.6354	24.6995	36.6187	38.1426	26.7704
Gm28036	2.31788	0.11756	0.879723	7.4085	0.191989	0.964785		0	2.67334	3.45934	0.979672	5.43746	0	0.929656	3.47722	4.25368	0.799406	1.6899	5.26179	0.628078	2.14778	5.23125	1.27142	1.16393
Gart	9.96033	0.0169234	0.42274	7.40329	0.192333	0.964806		6.01335	22.7234	6.05384	8.81705	6.52495	12.7965	11.1559	9.27259	4.25368	11.9911	10.9843	9.02021	6.28078	16.1084	7.84687	10.1714	9.31143
Ncapd2	2.10315	0.703074	1.0238	7.4022	0.192405	0.964806		0	2.67334	5.18901	0	0	2.95304	4.64828	2.31815	1.06342	0	1.6899	2.25505	5.6527	4.29556	1.74375	1.27142	0
Ube4b	9.00392	-0.0329447	0.42526	7.40305	0.192349	0.964806		6.01335	9.35668	17.2967	4.89836	9.78743	7.87479	5.57794	13.9089	9.57077	8.79347	6.75959	5.26179	6.90886	15.0345	10.4625	5.08568	10.4754
Unc119	15.834	0.15432	0.332965	7.40488	0.192227	0.964806		20.0445	12.03	12.1077	14.6951	9.78743	23.6244	21.3821	20.8633	10.6342	15.1887	10.1394	19.5438	15.0739	21.4778	19.1812	15.257	8.1475
Ift57	3.47332	0.128168	0.763942	7.39419	0.192935	0.966947		1.00222	5.34667	4.32417	7.83738	0	0.984348	5.57794	1.15907	1.06342	3.99703	5.91464	0	1.88423	2.14778	4.35937	7.62852	5.81964
Zfyve28	1.82175	0.698116	1.07002	7.39212	0.193073	0.967119		1.00222	0	0	1.95934	2.17498	0	0.929656	4.6363	4.25368	3.19763	4.22474	0	0.628078	2.14778	3.4875	0	2.32786
Aldh2	157.389	-0.0097624	0.160551	7.38484	0.193556	0.96747		197.438	149.707	223.127	151.849	104.399	123.044	131.081	152.998	169.084	158.282	150.401	169.129	144.458	156.788	192.684	161.47	139.671
Cox7a2	93.3636	0.214294	0.156405	7.38626	0.193461	0.96747		89.198	96.2401	85.6186	85.2315	75.0369	92.5287	90.1766	117.066	93.5809	83.1383	76.8903	96.2156	99.8644	125.645	114.216	69.9281	96.606
Fndc3b	11.6667	-0.0150675	0.384854	7.38773	0.193364	0.96747		16.0356	6.68334	12.9725	6.8577	16.3124	15.7496	18.5931	9.27259	5.3171	6.39525	10.1394	13.5303	18.2143	9.66501	10.4625	13.9856	8.1475
Tk2	17.5578	0.347308	0.327448	7.38753	0.193377	0.96747		10.0222	6.68334	17.2967	17.6341	17.3999	26.5774	14.8745	15.068	20.205	27.1798	17.7439	13.5303	16.33	15.0345	14.8219	31.7855	16.295
Ak1	4.27825	0.65827	0.644706	7.37954	0.193909	0.968401		4.0089	4.01	3.45934	0.979672	1.08749	7.87479	8.3669	6.95444	5.3171	2.39822	1.6899	5.26179	5.6527	4.29556	5.23125	3.81426	2.32786
Myof	31.721	-0.514127	0.237426	7.37893	0.193949	0.968401		37.0823	37.4267	42.3769	40.1666	44.5872	22.64	17.6635	32.4541	40.4099	27.9792	30.4182	24.0539	21.9827	32.2167	41.85	20.3427	25.6064
Hnrnph1	23.0996	0.164241	0.27799	7.37668	0.194099	0.968636		29.0645	26.7334	25.945	11.7561	14.1374	22.64	34.3973	23.1815	21.2684	19.1858	20.2788	27.0606	25.1231	25.7734	25.2844	15.257	25.6064
Degs1	81.0231	-0.0893126	0.168865	7.36219	0.195067	0.968814		108.24	110.943	83.0241	61.7193	79.3869	67.92	77.1614	81.1352	65.932	71.1472	88.7196	68.4033	97.3521	91.2807	82.8281	71.1995	70.9996
Get4	16.4215	0.117544	0.314958	7.36416	0.194935	0.968814		20.0445	24.06	8.64834	12.7357	15.2249	19.687	12.0855	18.5452	10.6342	14.3893	17.7439	15.7854	16.9581	25.7734	13.0781	13.9856	19.7868
Noct	10.5117	0.569513	0.406623	7.36263	0.195037	0.968814		14.0311	8.02001	6.05384	5.87803	4.34997	14.7652	17.6635	10.4317	6.38051	8.79347	10.1394	17.2887	12.5616	13.9606	11.3344	8.89994	8.1475
Nol6	6.8347	-0.601208	0.512293	7.37225	0.194395	0.968814		10.0222	10.6933	2.5945	4.89836	9.78743	8.85913	7.43725	11.5907	5.3171	8.79347	2.53485	10.5236	5.02462	8.59112	3.4875	2.54284	3.49178
Raver1	5.64435	-0.386646	0.53832	7.37071	0.194497	0.968814		6.01335	6.68334	3.45934	3.91869	8.69993	9.84348	3.71862	8.11352	7.44393	2.39822	3.37979	9.7719	4.39655	8.59112	3.4875	2.54284	3.49178
Rbm47	22.1033	0.208289	0.28517	7.36472	0.194898	0.968814		21.0467	17.3767	24.2154	15.6748	22.8373	23.6244	16.7338	27.8178	17.0147	11.9911	25.3485	30.8191	25.7512	36.5123	15.6937	16.5285	26.7704
Rps10	285.82	0.145447	0.112078	7.36867	0.194633	0.968814		307.683	283.374	279.342	239.04	260.998	253.962	311.435	321.063	289.25	242.22	250.105	323.224	295.197	351.162	298.181	273.355	279.343
Sdha	46.0937	0.197942	0.196752	7.36066	0.195169	0.968814		50.1112	33.4167	53.6197	43.1056	32.6248	42.327	48.3421	40.5676	59.5515	48.7638	43.9373	42.846	48.362	38.66	60.1594	48.3139	48.885
Specc1l	8.85372	-0.561023	0.431774	7.36087	0.195155	0.968814		11.0245	6.68334	12.1077	14.6951	11.9624	5.90609	6.50759	5.79537	4.25368	11.9911	13.5192	6.76516	8.79309	3.22167	6.10312	16.5285	4.65571
Zfp276	3.78631	-0.680281	0.703719	7.37226	0.194394	0.968814		8.0178	2.67334	6.91868	2.93902	1.08749	5.90609	1.85931	3.47722	6.38051	3.19763	4.22474	3.00674	4.39655	0	7.84687	1.27142	1.16393
Dtx4	27.3503	0.404529	0.30143	7.35222	0.195735	0.97008		39.0868	30.7434	10.378	18.6138	17.3999	25.5931	29.749	25.4996	14.8879	34.3745	39.7126	31.5707	21.9827	27.9211	23.5406	34.3283	39.5736
Fam91a1	16.2955	-0.955117	0.324258	7.35305	0.195679	0.97008		29.0645	29.4067	17.2967	18.6138	14.1374	18.7026	22.3117	16.227	13.8244	15.9881	10.1394	16.5371	11.9335	15.0345	6.10312	8.89994	12.8032
Iars	7.83835	-0.520507	0.459768	7.35307	0.195678	0.97008		11.0245	10.6933	7.78351	8.81705	8.69993	11.8122	9.29656	4.6363	0	6.39525	7.60454	13.5303	9.42117	3.22167	6.975	6.3571	6.98357
Chd4	33.92	0.0979913	0.244004	7.34983	0.195896	0.970364		30.0667	18.7134	36.323	40.1666	38.0622	21.6557	47.4124	30.1359	44.6636	26.3804	45.6272	28.564	38.3128	30.0689	37.4906	29.2427	33.7539
Dek	17.7969	-0.666211	0.317264	7.3393	0.196604	0.972539		17.0378	9.35668	25.945	34.2885	22.8373	14.7652	16.7338	18.5452	17.0147	20.7846	24.5035	14.282	9.42117	8.59112	16.5656	19.0713	12.8032
Fbxw8	13.6068	0.148659	0.344582	7.33713	0.19675	0.972539		16.0356	18.7134	11.2428	9.79672	9.78743	12.7965	16.7338	19.7043	13.8244	10.3923	10.1394	6.76516	21.3547	15.0345	12.2062	13.9856	12.8032
Galnt2	13.8102	-0.625584	0.355501	7.34153	0.196454	0.972539		18.04	16.04	10.378	22.5325	15.2249	22.64	12.0855	15.068	10.6342	12.7905	7.60454	13.5303	7.53694	18.2561	11.3344	15.257	5.81964
Ube2w	18.3746	0.491098	0.335199	7.33723	0.196744	0.972539		13.0289	17.3767	9.51318	9.79672	15.2249	41.3426	24.1711	18.5452	17.0147	11.9911	14.3641	21.7989	18.8423	22.5517	13.0781	21.6141	22.1146
Ctso	10.5584	0.239552	0.394925	7.33371	0.196981	0.972949		9.02002	2.67334	15.567	14.6951	8.69993	14.7652	10.2262	3.47722	9.57077	11.1917	6.75959	11.2753	10.6773	10.7389	15.6937	13.9856	10.4754
Hmga1	86.2434	0.128165	0.195057	7.33282	0.197041	0.972949		93.2069	120.3	52.7549	94.0485	68.512	79.7322	113.418	93.885	79.7564	65.5513	66.7509	72.1617	85.4186	98.7979	77.5968	102.985	101.262
Ppa1	3.4359	-0.851516	0.735714	7.33075	0.197181	0.973127		2.00445	10.6933	3.45934	1.95934	4.34997	1.9687	2.78897	2.31815	6.38051	4.79644	4.22474	0	0.628078	4.29556	2.61562	1.27142	4.65571
Mvb12b	10.1873	0.218138	0.427961	7.32825	0.19735	0.973446		14.0311	10.6933	6.05384	5.87803	5.43746	15.7496	13.9448	8.11352	7.44393	11.1917	10.1394	17.2887	11.3054	16.1084	11.3344	3.81426	4.65571
Atpif1	123.155	0.431967	0.158624	7.32094	0.197844	0.974272		129.287	116.29	110.699	90.1298	68.512	118.122	150.604	120.544	121.23	135.1	98.014	164.619	145.714	137.458	137.756	115.699	133.852
Eef1akmt1	7.16524	-0.135548	0.495518	7.31964	0.197933	0.974272		12.0267	12.03	6.91868	1.95934	6.52495	8.85913	9.29656	9.27259	9.57077	3.19763	1.6899	3.00674	9.42117	8.59112	6.10312	6.3571	6.98357
Fbrs	22.0251	-0.0855872	0.28236	7.32188	0.197781	0.974272		16.0356	17.3767	22.4857	29.3902	27.1873	12.7965	20.4524	24.3406	28.7123	27.1798	27.0384	20.2955	15.0739	13.9606	18.3094	30.5141	23.2786
Polb	10.7989	-0.10065	0.42673	7.32369	0.197658	0.974272		6.01335	8.02001	8.64834	10.7764	15.2249	13.7809	9.29656	11.5907	14.8879	19.1858	10.9843	3.75842	3.14039	13.9606	7.84687	10.1714	16.295
Nkiras2	15.8881	-0.291317	0.336251	7.30916	0.198644	0.977258		20.0445	10.6933	25.945	19.5934	9.78743	18.7026	16.7338	15.068	13.8244	17.5869	14.3641	19.5438	21.3547	8.59112	20.0531	8.89994	9.31143
Slc9a3r1	30.085	-0.0304128	0.243684	7.30718	0.198779	0.977409		24.0534	30.7434	38.0527	35.2682	29.3623	25.5931	21.3821	33.6131	36.1562	24.7816	27.8833	29.3157	21.9827	19.33	44.4656	36.8712	32.59
Acsl4	11.7977	-0.293575	0.373976	7.29594	0.199544	0.978538		19.0423	17.3767	12.9725	8.81705	11.9624	11.8122	15.8041	5.79537	13.8244	4.79644	8.44949	10.5236	15.0739	18.2561	11.3344	8.89994	5.81964
Ccn2	6.666	-1.43602	0.786707	7.29751	0.199438	0.978538		31.069	18.7134	2.5945	0	1.08749	4.92174	5.57794	2.31815	2.12684	7.19466	16.054	3.00674	2.51231	2.14778	0.871875	3.81426	9.31143
Il15ra	1.97067	-0.319632	1.00927	7.29841	0.199376	0.978538		0	1.33667	4.32417	4.89836	0	1.9687	0	1.15907	3.19026	2.39822	3.37979	2.25505	0.628078	0	0.871875	1.27142	5.81964
Incenp	6.2121	-0.0730614	0.543902	7.29461	0.199636	0.978538		5.01112	5.34667	7.78351	2.93902	10.8749	8.85913	10.2262	2.31815	7.44393	0.799406	4.22474	6.76516	11.3054	8.59112	6.975	3.81426	2.32786
Rpl18	192.853	-0.0561879	0.1377	7.30078	0.199215	0.978538		205.456	270.007	155.67	186.138	199.011	166.355	197.087	183.134	169.084	177.468	206.167	212.727	185.911	240.551	180.478	164.013	179.245
Slc25a17	9.79512	0.46048	0.412243	7.29926	0.199318	0.978538		8.0178	2.67334	12.1077	8.81705	8.69993	12.7965	10.2262	3.47722	14.8879	7.99406	8.44949	10.5236	7.53694	8.59112	14.8219	15.257	11.6393
Enpp4	2.01061	-1.22964	0.982027	7.28988	0.199959	0.978936		1.00222	1.33667	2.5945	3.91869	3.26248	0.984348	0.929656	1.15907	6.38051	3.19763	3.37979	0	0	2.14778	2.61562	1.27142	0
Mideas	4.64683	0.864026	0.60578	7.28814	0.200078	0.978936		3.00667	1.33667	4.32417	2.93902	3.26248	5.90609	2.78897	3.47722	8.50735	2.39822	5.91464	4.51011	3.14039	4.29556	11.3344	2.54284	9.31143
Rab3gap1	9.85598	0.209949	0.42746	7.28812	0.200079	0.978936		8.0178	10.6933	2.5945	15.6748	8.69993	12.7965	9.29656	12.7498	5.3171	14.3893	5.91464	11.2753	12.5616	15.0345	6.975	5.08568	10.4754
Ugp2	33.8419	-0.0442886	0.247268	7.28731	0.200135	0.978936		44.0979	46.7834	41.5121	24.4918	18.4874	33.4678	31.6083	37.0904	34.0294	20.7846	37.1777	35.3292	28.8916	42.9556	34.875	24.157	39.5736
B4gat1	4.03058	-0.0465059	0.689241	7.28348	0.200397	0.979599		2.00445	2.67334	2.5945	4.89836	2.17498	9.84348	3.71862	1.15907	9.57077	5.59585	3.37979	8.26853	3.76847	2.14778	1.74375	3.81426	1.16393
Kif1b	13.3323	-0.293776	0.361543	7.28227	0.20048	0.979599		24.0534	10.6933	16.4319	8.81705	8.69993	16.7339	20.4524	12.7498	14.8879	12.7905	10.9843	12.7786	16.33	10.7389	6.10312	15.257	8.1475
Nek2	1.80961	0.504689	1.13357	7.27643	0.20088	0.980326		1.00222	2.67334	1.72967	0	0	6.89044	5.57794	1.15907	1.06342	0	0	1.50337	1.25616	3.22167	0.871875	3.81426	0
Rpl14	188.74	0.12105	0.144256	7.27553	0.200942	0.980326		174.387	221.887	169.508	169.483	172.911	172.261	209.173	220.224	157.386	172.672	177.439	220.244	232.389	215.852	224.072	146.213	152.475
Wdfy2	14.346	-0.368826	0.335822	7.27651	0.200875	0.980326		9.02002	10.6933	24.2154	25.4715	17.3999	14.7652	10.2262	10.4317	14.8879	14.3893	11.8293	12.7786	8.16502	11.8128	16.5656	11.4428	19.7868
Cdkl2	1.7778	0.743235	0.98616	7.27281	0.201129	0.980725		3.00667	1.33667	3.45934	0.979672	0	0	0	3.47722	3.19026	1.59881	0	0	3.14039	2.14778	1.74375	3.81426	2.32786
Ccnt2	6.51247	-0.27429	0.508083	7.25046	0.20267	0.983211		8.0178	5.34667	6.91868	11.7561	7.61244	0.984348	6.50759	2.31815	8.50735	6.39525	7.60454	6.01348	3.14039	2.14778	4.35937	11.4428	11.6393
Cdk2ap2	14.5557	0.522667	0.354283	7.25345	0.202463	0.983211		10.0222	13.3667	10.378	14.6951	9.78743	11.8122	10.2262	28.9768	15.9513	8.79347	12.6742	13.5303	9.42117	21.4778	22.6687	12.7142	20.9507
Chd6	2.80278	0.0267472	0.796453	7.26079	0.201956	0.983211		3.00667	0	6.05384	0.979672	5.43746	2.95304	3.71862	0	1.06342	3.99703	1.6899	2.25505	2.51231	1.07389	3.4875	1.27142	8.1475
Ftsj1	2.19396	-0.701154	0.914969	7.24742	0.20288	0.983211		4.0089	2.67334	0	2.93902	2.17498	0.984348	3.71862	6.95444	1.06342	3.19763	0.844949	2.25505	0.628078	2.14778	0	2.54284	1.16393
Fzd5	2.62424	0.35663	0.88637	7.26253	0.201836	0.983211		3.00667	1.33667	0.864834	0	3.26248	6.89044	3.71862	1.15907	8.50735	0	1.6899	3.00674	3.76847	3.22167	1.74375	1.27142	1.16393
Ift172	2.9823	-0.0281208	0.747022	7.25112	0.202624	0.983211		1.00222	0	5.18901	6.8577	5.43746	0.984348	0	2.31815	4.25368	3.19763	1.6899	3.00674	1.25616	5.36945	2.61562	6.3571	1.16393
Oxsr1	6.5775	0.163169	0.490712	7.25987	0.202019	0.983211		6.01335	12.03	6.91868	3.91869	5.43746	1.9687	10.2262	5.79537	6.38051	4.79644	7.60454	2.25505	8.16502	9.66501	3.4875	10.1714	6.98357
Rsu1	19.7007	0.230562	0.296117	7.25507	0.202351	0.983211		23.0512	18.7134	28.5395	12.7357	15.2249	14.7652	14.8745	20.8633	18.0781	14.3893	18.5889	14.282	18.2143	35.4384	30.5156	20.3427	16.295
Sel1l3	5.27824	-1.08313	0.542869	7.24716	0.202898	0.983211		15.0334	5.34667	6.91868	5.87803	5.43746	5.90609	7.43725	4.6363	2.12684	3.19763	3.37979	6.01348	5.6527	6.44334	2.61562	2.54284	1.16393
Sinhcaf	1.87949	-0.508401	0.990598	7.25756	0.202179	0.983211		4.0089	1.33667	0.864834	0.979672	1.08749	2.95304	3.71862	4.6363	0	0.799406	3.37979	2.25505	2.51231	2.14778	0	1.27142	0
Tasl	9.04138	0.12682	0.538701	7.25497	0.202358	0.983211		0	4.01	6.91868	18.6138	13.0499	11.8122	11.1559	12.7498	2.12684	10.3923	14.3641	4.51011	5.6527	4.29556	9.59062	13.9856	10.4754
Vta1	13.9982	0.208299	0.340333	7.24853	0.202803	0.983211		14.0311	12.03	6.91868	15.6748	13.0499	16.7339	19.5228	15.068	8.50735	11.1917	17.7439	13.5303	16.33	17.1822	7.84687	13.9856	18.6229
Nprl3	3.83668	-0.0622926	0.695322	7.24295	0.20319	0.983606		7.01557	2.67334	0.864834	0.979672	7.61244	3.93739	8.3669	0	3.19026	5.59585	3.37979	6.01348	4.39655	2.14778	1.74375	3.81426	3.49178
Tango2	6.85198	0.368698	0.482975	7.24352	0.20315	0.983606		7.01557	5.34667	1.72967	7.83738	6.52495	7.87479	5.57794	11.5907	3.19026	7.99406	7.60454	6.76516	7.53694	10.7389	3.4875	6.3571	9.31143
Gna13	25.9075	-0.00682652	0.266172	7.23678	0.203618	0.984151		31.069	25.3967	27.6747	28.4105	16.3124	24.6087	39.9752	25.4996	24.4586	19.9852	21.9687	27.8123	32.6601	21.4778	35.7469	15.257	22.1146
Ubxn7	2.21757	0.882837	0.932164	7.23712	0.203594	0.984151		2.00445	0	2.5945	0	3.26248	0	2.78897	2.31815	2.12684	5.59585	1.6899	0	0.628078	4.29556	4.35937	2.54284	3.49178
Zfp652	8.73898	-0.528938	0.45225	7.23727	0.203584	0.984151		9.02002	6.68334	8.64834	11.7561	15.2249	12.7965	0.929656	4.6363	8.50735	11.1917	13.5192	8.26853	5.02462	8.59112	5.23125	12.7142	5.81964
Tspan17	9.92054	0.590495	0.421772	7.23218	0.203938	0.98519		4.0089	14.7033	13.8374	4.89836	4.34997	7.87479	11.1559	12.7498	9.57077	9.59288	6.75959	9.7719	10.6773	11.8128	20.0531	6.3571	10.4754
Slc23a2	20.1509	-0.672709	0.291205	7.22446	0.204475	0.987277		42.0934	34.7534	14.7022	19.5934	22.8373	17.7183	24.1711	16.227	15.9513	17.5869	17.7439	20.2955	20.0985	17.1822	14.8219	13.9856	12.8032
Lyar	2.0916	-0.904514	1.03563	7.22082	0.204729	0.987597		4.0089	9.35668	0	0.979672	1.08749	1.9687	1.85931	4.6363	1.06342	0	2.53485	3.00674	2.51231	0	0	2.54284	0
Psmd8	146.211	0.317178	0.158595	7.22049	0.204752	0.987597		114.254	132.33	140.968	143.032	128.324	118.122	164.549	165.748	153.132	120.71	108.153	178.901	187.167	206.187	172.631	137.313	114.065
Fhod1	5.96316	0.00922344	0.551564	7.21686	0.205005	0.988308		9.02002	8.02001	3.45934	3.91869	1.08749	9.84348	9.29656	8.11352	4.25368	5.59585	5.91464	9.7719	8.79309	2.14778	6.10312	2.54284	3.49178
Dhfr	2.25807	-1.37488	0.897495	7.215	0.205135	0.988426		3.00667	4.01	2.5945	3.91869	2.17498	2.95304	5.57794	0	1.06342	0.799406	0.844949	2.25505	6.28078	0	1.74375	0	1.16393
Mad1l1	2.58191	0.446886	0.799973	7.20481	0.205849	0.991354		2.00445	5.34667	1.72967	0	3.26248	0.984348	0.929656	3.47722	3.19026	2.39822	1.6899	2.25505	1.25616	7.51723	4.35937	0	3.49178
Ahcy	3.03406	-2.72804	0.902275	7.18856	0.206991	0.994136		4.0089	14.7033	6.91868	5.87803	3.26248	0.984348	5.57794	1.15907	2.12684	0	0	0	0.628078	4.29556	0.871875	0	1.16393
Cfp	255.474	0.293817	0.167107	7.19193	0.206753	0.994136		176.392	120.3	208.425	255.694	274.048	342.553	310.505	282.814	286.06	339.748	234.896	232.271	246.835	221.221	224.072	296.241	290.982
Gm28043	3.97923	-0.696313	0.694737	7.18636	0.207146	0.994136		4.0089	2.67334	3.45934	9.79672	3.26248	3.93739	1.85931	6.95444	1.06342	5.59585	5.06969	5.26179	3.76847	0	0.871875	8.89994	1.16393
Gngt2	39.835	-0.204207	0.255909	7.18981	0.206902	0.994136		42.0934	50.7934	36.323	30.3698	46.7621	43.3113	33.4676	24.3406	38.2831	52.7608	52.3868	35.3292	20.7266	31.1428	33.1312	41.9568	64.0161
Nrros	62.1363	-0.394755	0.190792	7.19266	0.206701	0.994136		54.1201	66.8334	84.7538	101.886	79.3869	58.0765	41.8345	52.1583	42.5368	52.7608	67.5959	54.873	52.1305	62.2856	47.9531	80.0994	57.0325
Ttyh3	15.6479	-0.22265	0.344571	7.18602	0.207169	0.994136		9.02002	10.6933	19.0264	16.6544	29.3623	23.6244	8.3669	16.227	11.6976	14.3893	17.7439	18.0404	14.4458	7.51723	17.4375	17.7999	13.9671
Ubxn4	21.7073	0.0323999	0.29243	7.19403	0.206605	0.994136		27.0601	21.3867	19.0264	24.4918	10.8749	24.6087	19.5228	24.3406	17.0147	30.3774	19.4338	27.0606	30.7758	21.4778	11.3344	21.6141	18.6229
Jagn1	9.10291	-0.584553	0.430434	7.18322	0.207367	0.994499		18.04	14.7033	10.378	7.83738	6.52495	12.7965	13.9448	3.47722	2.12684	7.99406	6.75959	10.5236	10.0492	6.44334	6.10312	8.89994	8.1475
Ppfia1	6.79465	-0.591313	0.513781	7.18194	0.207457	0.994499		13.0289	9.35668	5.18901	5.87803	4.34997	9.84348	7.43725	8.11352	5.3171	3.99703	9.29444	9.02021	10.0492	5.36945	1.74375	6.3571	1.16393
Rpl36al	84.5048	-0.096538	0.163652	7.17631	0.207855	0.995896		84.1869	116.29	77.8351	90.1298	92.4368	63.9826	82.7394	84.6124	65.932	76.743	95.4792	84.9403	85.4186	109.537	76.725	62.2996	87.2946
Eno1b	20.206	-3.41427	0.428851	7.17288	0.208097	0.996037		61.1357	118.963	40.6472	28.4105	29.3623	7.87479	3.71862	6.95444	7.44393	5.59585	4.22474	5.26179	6.90886	3.22167	4.35937	1.27142	8.1475
Rps18	243.847	0.330983	0.137129	7.17292	0.208094	0.996037		187.416	268.67	200.642	158.707	229.461	254.946	270.53	265.428	220.128	250.214	251.795	296.915	272.586	312.502	274.641	208.513	222.31
Dyrk1a	8.9938	0.535436	0.448696	7.16509	0.208649	0.998169		4.0089	8.02001	3.45934	8.81705	10.8749	8.85913	13.0152	8.11352	4.25368	10.3923	13.5192	8.26853	5.6527	5.36945	8.71875	15.257	16.295
Hspa4	31.2926	-0.240972	0.242798	7.16028	0.20899	0.998819		43.0957	42.7734	27.6747	30.3698	28.2748	36.4209	32.538	31.295	23.3952	21.584	33.7979	36.0809	37.6847	31.1428	34.875	16.5285	24.4425
Itgb1	86.9128	-0.38202	0.163282	7.16017	0.208998	0.998819		116.258	129.657	111.564	75.4347	91.3493	78.7479	82.7394	96.2031	70.1857	74.3448	76.8903	74.4168	91.0713	78.394	95.9062	61.0281	73.3275
0610009B22Rik	9.94779	0.615302	0.421727	2.72258	0.742663	1		5.01112	9.35668	6.91868	8.81705	7.61244	7.87479	8.3669	9.27259	12.761	14.3893	10.9843	11.2753	7.53694	18.2561	10.4625	5.08568	15.1311
0610010F05Rik	3.8036	-0.894329	0.628756	3.92416	0.560386	1		7.01557	5.34667	1.72967	6.8577	7.61244	2.95304	3.71862	2.31815	3.19026	1.59881	1.6899	6.01348	5.6527	3.22167	0.871875	2.54284	2.32786
0610010K14Rik	8.25823	-0.720091	0.435071	1.09624	0.954436	1		9.02002	12.03	11.2428	7.83738	10.8749	8.85913	11.1559	6.95444	5.3171	9.59288	10.1394	5.26179	6.90886	4.29556	5.23125	6.3571	9.31143
0610012G03Rik	38.3981	-0.11888	0.239347	4.21425	0.519	1		37.0823	25.3967	52.7549	54.8616	32.6248	44.2957	32.538	27.8178	44.6636	39.1709	34.6429	43.5977	47.7339	40.8078	34.0031	30.5141	30.2621
0610030E20Rik	4.63668	-0.653101	0.589976	3.94051	0.558012	1		4.0089	5.34667	7.78351	10.7764	4.34997	0.984348	6.50759	4.6363	5.3171	3.99703	1.6899	3.75842	2.51231	2.14778	2.61562	8.89994	3.49178
1110004F10Rik	29.5933	-0.174698	0.257002	0.517061	0.991485	1		40.089	41.4367	23.3505	31.3495	31.5373	31.4991	21.3821	23.1815	32.966	19.9852	26.1934	26.309	25.1231	33.2906	33.1312	34.3283	27.9343
1110008P14Rik	25.0446	0.0665986	0.284433	3.16046	0.675263	1		34.0756	41.4367	17.2967	17.6341	14.1374	28.5461	20.4524	25.4996	22.3318	23.9822	27.0384	26.309	25.1231	26.8473	25.2844	24.157	25.6064
1110032A03Rik	5.1099	-0.18963	0.550217	1.07012	0.956714	1		7.01557	5.34667	4.32417	4.89836	6.52495	3.93739	4.64828	4.6363	4.25368	4.79644	6.75959	4.51011	5.02462	5.36945	3.4875	10.1714	1.16393
1110038B12Rik	11.2113	0.021134	0.37277	3.79953	0.578624	1		20.0445	12.03	6.05384	7.83738	13.0499	10.8278	13.0152	8.11352	10.6342	9.59288	10.1394	10.5236	14.4458	10.7389	10.4625	11.4428	11.6393
1110038F14Rik	6.72418	-0.215669	0.540198	0.739057	0.980757	1		4.0089	4.01	10.378	4.89836	8.69993	7.87479	12.0855	10.4317	6.38051	5.59585	4.22474	5.26179	7.53694	7.51723	1.74375	10.1714	3.49178
1110051M20Rik	4.11076	-1.82216	0.702057	1.5569	0.906412	1		4.0089	5.34667	10.378	12.7357	4.34997	2.95304	1.85931	4.6363	3.19026	4.79644	3.37979	3.75842	4.39655	3.22167	0.871875	0	0
1110059E24Rik	4.84908	-0.609906	0.580789	3.52116	0.620188	1		9.02002	2.67334	8.64834	5.87803	6.52495	3.93739	8.3669	2.31815	3.19026	6.39525	0.844949	1.50337	5.02462	6.44334	4.35937	3.81426	3.49178
1110059G10Rik	9.26578	0.70489	0.429371	3.66793	0.598144	1		10.0222	5.34667	9.51318	6.8577	4.34997	9.84348	7.43725	5.79537	11.6976	7.19466	5.91464	10.5236	7.53694	7.51723	14.8219	20.3427	12.8032
1110065P20Rik	6.76591	-0.320507	0.472606	6.0659	0.299859	1		9.02002	9.35668	2.5945	9.79672	14.1374	3.93739	7.43725	4.6363	2.12684	5.59585	5.91464	7.51684	9.42117	6.44334	5.23125	2.54284	9.31143
1190007I07Rik	4.11424	-0.667288	0.639839	4.40603	0.492554	1		3.00667	8.02001	6.05384	3.91869	4.34997	4.92174	5.57794	3.47722	0	2.39822	5.06969	4.51011	3.14039	8.59112	0.871875	2.54284	3.49178
1300002E11Rik	1.48487	0.013182	1.07195	1.87384	0.866312	1		1.00222	2.67334	1.72967	0.979672	0	0.984348	1.85931	3.47722	1.06342	0.799406	3.37979	1.50337	0.628078	2.14778	1.74375	1.27142	0
1500011B03Rik	10.4433	-0.806652	0.403647	0.974757	0.964576	1		11.0245	21.3867	14.7022	13.7154	9.78743	12.7965	13.9448	5.79537	5.3171	9.59288	10.1394	7.51684	10.6773	7.51723	7.84687	7.62852	8.1475
1600012H06Rik	10.3535	-0.258782	0.396049	3.20673	0.668148	1		13.0289	8.02001	12.9725	8.81705	15.2249	4.92174	9.29656	13.9089	8.50735	11.1917	12.6742	9.02021	6.28078	10.7389	6.10312	10.1714	15.1311
1600020E01Rik	1.93335	0.863694	1.00874	1.5563	0.906483	1		0	0	1.72967	3.91869	2.17498	1.9687	0	1.15907	4.25368	0	3.37979	1.50337	3.14039	4.29556	1.74375	1.27142	2.32786
1700003F12Rik	2.971	-0.137074	0.692362	4.65559	0.459339	1		4.0089	4.01	3.45934	1.95934	4.34997	1.9687	3.71862	2.31815	1.06342	0.799406	2.53485	3.00674	8.16502	3.22167	3.4875	1.27142	1.16393
1700025G04Rik	1.75127	-0.0513351	0.99693	2.93761	0.709604	1		1.00222	2.67334	0.864834	0	3.26248	2.95304	0	3.47722	3.19026	1.59881	2.53485	1.50337	1.25616	2.14778	0.871875	1.27142	1.16393
1700037H04Rik	17.7992	0.148768	0.318647	5.80652	0.325503	1		18.04	18.7134	22.4857	14.6951	17.3999	7.87479	16.7338	16.227	21.2684	23.9822	10.9843	16.5371	15.702	17.1822	32.2594	12.7142	19.7868
1700052K11Rik	1.83603	-1.0382	0.9158	0.711738	0.982318	1		4.0089	4.01	1.72967	1.95934	2.17498	1.9687	1.85931	1.15907	1.06342	0.799406	1.6899	1.50337	1.25616	0	3.4875	2.54284	0
1700066M21Rik	2.03053	-0.257015	0.904906	2.78423	0.733208	1		0	2.67334	2.5945	2.93902	2.17498	3.93739	1.85931	1.15907	2.12684	2.39822	1.6899	1.50337	0.628078	2.14778	4.35937	0	2.32786
1700123O20Rik	8.75119	0.194337	0.433669	1.13362	0.951085	1		6.01335	5.34667	6.05384	10.7764	9.78743	10.8278	13.0152	9.27259	9.57077	11.1917	5.91464	6.01348	10.0492	8.59112	10.4625	8.89994	6.98357
1810009A15Rik	13.6116	-0.347129	0.345652	3.21968	0.666159	1		20.0445	16.04	14.7022	12.7357	15.2249	11.8122	17.6635	15.068	7.44393	12.7905	11.8293	12.027	10.0492	21.4778	10.4625	12.7142	9.31143
1810013L24Rik	18.6743	0.097551	0.308738	2.8886	0.717155	1		22.0489	21.3867	23.3505	12.7357	9.78743	17.7183	24.1711	17.3861	19.1415	23.9822	15.2091	15.7854	21.9827	20.4039	17.4375	13.9856	20.9507
1810030O07Rik	8.21026	0.100199	0.460587	1.14273	0.950252	1		4.0089	8.02001	11.2428	4.89836	8.69993	11.8122	9.29656	8.11352	6.38051	11.9911	5.91464	9.7719	7.53694	6.44334	8.71875	5.08568	11.6393
1810037I17Rik	25.7528	-0.513232	0.295234	4.23772	0.515722	1		38.0845	28.07	25.945	32.3292	26.0998	29.5304	26.0304	22.0224	28.7123	16.7875	31.2631	17.2887	21.9827	30.0689	17.4375	8.89994	37.2457
1810055G02Rik	2.17515	-1.26111	0.948718	2.49296	0.777554	1		5.01112	1.33667	2.5945	0	4.34997	1.9687	6.50759	4.6363	1.06342	1.59881	1.6899	1.50337	0.628078	1.07389	1.74375	1.27142	0
1810058I24Rik	55.1944	0.0568341	0.187818	3.93914	0.558212	1		54.1201	52.13	66.5922	67.5974	47.8496	53.1548	42.7642	38.2494	47.8539	59.9555	42.2474	66.1482	62.1797	70.8767	56.6719	61.0281	48.885
2010001A14Rik	1.89063	0.383599	0.997003	2.67894	0.749337	1		1.00222	0	3.45934	0.979672	2.17498	0	0.929656	3.47722	2.12684	3.19763	3.37979	3.00674	0.628078	2.14778	4.35937	1.27142	0
2010008C14Rik	2.02981	0.143759	0.975593	6.2734	0.280518	1		2.00445	1.33667	3.45934	1.95934	0	1.9687	0	1.15907	5.3171	3.19763	1.6899	0	1.25616	0	5.23125	1.27142	4.65571
2010315B03Rik	4.41677	-0.392908	0.581636	1.25921	0.939072	1		6.01335	2.67334	8.64834	6.8577	3.26248	3.93739	2.78897	3.47722	5.3171	3.19763	3.37979	3.00674	3.14039	8.59112	3.4875	3.81426	3.49178
2210016F16Rik	17.1638	0.186927	0.306572	2.46623	0.781572	1		19.0423	16.04	10.378	18.6138	21.7498	10.8278	13.0152	16.227	19.1415	18.3863	16.054	16.5371	15.0739	20.4039	16.5656	21.6141	22.1146
2210016L21Rik	9.62428	0.22635	0.438228	1.48197	0.915141	1		8.0178	2.67334	12.1077	5.87803	10.8749	7.87479	11.1559	10.4317	11.6976	11.9911	14.3641	15.0337	7.53694	9.66501	9.59062	8.89994	5.81964
2210408F21Rik	2.07944	1.85033	0.970012	2.25659	0.812621	1		2.00445	2.67334	0.864834	0	0	1.9687	1.85931	2.31815	0	0.799406	2.53485	0.751684	4.39655	3.22167	3.4875	3.81426	4.65571
2310001H17Rik	3.78573	0.257786	0.642711	7.02978	0.218435	1		5.01112	2.67334	4.32417	6.8577	3.26248	0	0.929656	0	5.3171	5.59585	0.844949	5.26179	4.39655	4.29556	4.35937	8.89994	2.32786
[truncated: 13,927 more rows]
