# Supplementary material for: SARS-CoV-2 mRNA vaccine is re-adenylated in vivo, enhancing antigen production and immune response
Source: bioRxiv preprint, doi:10.1101/2022.12.01.518149, version 2 (2022-12-16)
Supplement: Supplementary Table 5 [file 518149_file14.xlsx]

## Sheet: Supplementary Table 5
gene	baseMean	log2FoldChange	lfcSE	stat	p. value	adjusted p. value	normalized expression values
							DC_0h_2	DC_12h_2	DC_24h_2	DC_48h_2	DC_72h_2	DC_12h_1	DC_24h_1	DC_48h_1	DC_72h_1
S100a9	140.482	-0.872473	0.195469	70.9508	1.42967e-14	1.0551e-11	137.361	156.317	127.988	72.1332	38.0147	300.46	236.32	134.559	61.181
S100a8	152.811	-0.0244635	0.196175	68.8839	3.90457e-14	1.44079e-11	154.458	213.908	193.595	116.973	61.5476	281.557	203.335	102.69	47.241
Lpl	59.4836	-0.107867	0.256672	36.3155	2.49196e-07	6.13023e-05	27.7081	29.618	46.2476	72.1332	94.1317	22.8827	64.1634	70.8205	107.648
Ctsd	485.969	0.456822	0.15395	28.1373	1.16986e-05	0.00215838	301.841	503.505	510.875	614.107	700.557	279.07	428.359	414.3	621.103
Ccl5	98.8453	0.217619	0.255255	26.153	2.9474e-05	0.00435036	114.37	97.0811	136.592	103.326	59.7374	142.271	138.268	73.1812	24.7822
mt-Nd5	145.848	0.14399	0.20838	24.4544	6.47544e-05	0.00796479	52.4685	192.517	126.912	128.67	211.796	117.896	122.001	187.674	172.701
Ctsb	472.096	0.169027	0.148631	23.6414	9.42438e-05	0.00993599	302.431	381.743	454.948	621.905	637.199	351.698	472.64	426.103	600.193
C1qb	53.0279	-0.177499	0.275983	21.135	0.000297743	0.0274668	29.4767	19.7453	39.7945	64.335	95.9419	35.319	54.2226	60.1974	78.2187
Naaa	97.3145	-0.939462	0.212122	19.8555	0.000533284	0.0437293	47.7522	49.3633	50.5497	79.9314	106.803	95.5106	107.09	147.543	191.287
Gm2000	242.361	3.59522	0.18908	18.203	0.00112633	0.0831229	224.612	580.841	440.966	354.818	430.833	36.8114	40.6669	28.3282	43.3688
mt-Nd4	227.305	-1.78373	0.185342	17.7785	0.00136334	0.0914674	49.5209	131.635	87.1176	101.376	126.716	322.348	318.558	443.808	464.666
Gm29216	252.226	-1.14439	0.18303	17.1489	0.00180836	0.111214	300.073	176.062	141.969	136.468	155.679	296.481	436.944	258.495	367.86
H2-K1	272.625	0.784521	0.164064	16.9006	0.00202084	0.114721	196.904	253.398	310.827	421.102	456.177	183.559	201.979	211.281	218.393
Apoe	148.543	-0.750628	0.191386	16.2936	0.00264941	0.122204	104.937	83.9176	96.7974	116.973	161.11	118.891	209.661	175.871	268.732
Gm45713	275.731	3.94013	0.210867	16.3715	0.00255914	0.122204	239.94	704.249	448.494	426.951	524.965	27.3598	37.9558	25.9675	45.6921
Rpsa	2823.06	1.89827	0.132703	16.361	0.00257116	0.122204	2444.21	5188.08	4301.03	4407.93	4210.58	1095.88	1177.99	1238.18	1343.66
Rplp1	2466.69	1.58724	0.122963	15.2242	0.00425802	0.184848	2215.47	3876.66	3476.1	3971.23	3662.08	1125.73	1179.79	1298.38	1394.77
Rn18s	139.274	-0.0879471	0.198837	15.0547	0.0045891	0.188153	72.5127	93.7902	147.347	150.115	181.022	139.784	113.867	167.608	187.415
Ftl1-ps1	438.006	1.02718	0.139096	14.7188	0.00532136	0.196358	345.467	564.387	604.446	705.736	541.257	277.08	289.187	316.331	298.161
Rps15	1391.05	1.45043	0.122728	14.7927	0.00515096	0.196358	1275.75	1828.09	2061.78	2247.83	2090.81	682.005	699.471	782.566	851.113
Ccr2	63.2094	-0.349171	0.257663	14.2479	0.00654437	0.217519	90.7882	88.8539	52.7008	38.9909	32.584	84.0692	65.9708	68.4598	46.4666
Cst3	2680.14	0.606986	0.140528	14.2559	0.00652143	0.217519	2546.79	2206.54	2936.19	3581.32	4444.1	1956.48	1916.77	2147.04	2386.06
mt-Rnr2	5007.27	-0.915441	0.122849	14.0704	0.00707379	0.217519	3265.43	2578.41	3726.7	4004.37	4243.17	5713.23	6100.95	7324.02	8109.19
Ndufa2	142.286	1.78001	0.187493	14.1106	0.00695037	0.217519	107.885	240.235	229.087	189.106	248.001	61.6839	61.0004	68.4598	75.121
Wdfy4	51.6406	-1.81453	0.306621	13.7257	0.00822408	0.242775	60.1325	11.5181	27.9637	23.3946	27.1534	76.11	76.3635	66.0991	96.0309
Rtl8b	47.455	-1.28507	0.297609	13.6151	0.0086304	0.244971	35.372	13.1635	21.5105	33.1423	50.6863	44.7706	63.2597	63.7384	101.452
Selenow	165.82	1.79198	0.197222	13.4879	0.00912214	0.249339	132.645	167.835	283.939	284.634	325.84	73.6228	82.2376	67.2795	74.3465
Vamp8	118.833	1.85482	0.195946	12.9938	0.0113059	0.297992	93.1464	217.198	165.631	196.904	184.643	53.2273	45.1855	55.476	58.0832
Rtl8a	63.4881	0.375917	0.247975	12.797	0.0123117	0.302867	57.1848	54.2996	48.3987	87.7296	99.5623	34.3241	46.0892	82.6239	61.181
Taldo1	361.709	1.36322	0.147834	12.8749	0.0119034	0.302867	297.125	511.733	580.784	499.084	537.637	228.827	201.979	205.379	192.836
Cd63	52.7765	-0.571991	0.265046	12.5224	0.0138615	0.329993	24.7604	24.6816	47.3232	44.8396	66.9783	48.2528	70.0375	61.3778	86.7376
Rps24	1728.91	1.31402	0.126326	12.3448	0.014963	0.345085	1542.22	2793.96	2397.35	2353.1	2449.23	971.025	916.362	1021	1115.97
mt-Co1	1649.36	-3.66447	0.164222	12.2694	0.0154565	0.345664	440.382	291.243	260.277	224.198	257.052	2751.4	2686.73	3766.47	4166.5
Grn	233.727	0.749191	0.171838	12.0682	0.0168511	0.365768	209.874	182.644	294.694	387.96	334.892	151.225	171.253	198.297	172.701
Mir6236	43.6293	-1.10867	0.301485	11.9129	0.0180109	0.379773	18.2756	18.0999	29.0392	21.445	52.4965	60.1916	59.6449	41.3119	92.1587
Wdr89	448.015	1.69218	0.173014	11.7535	0.0192813	0.395266	397.935	928.03	616.277	656.997	573.841	199.975	167.186	252.593	239.303
Eef1d	121.262	1.73338	0.197174	11.3971	0.0224459	0.435924	94.915	192.517	200.048	181.308	190.074	50.2426	55.1263	56.6564	70.4743
Uap1l1	45.6125	1.70296	0.27866	11.4195	0.0222328	0.435924	26.529	59.2359	68.8337	81.881	85.0805	20.8929	23.9483	22.4265	21.6844
Ogfr	47.8974	1.66099	0.273401	11.3205	0.0231886	0.4388	29.4767	72.3995	68.8337	74.0828	90.5112	22.8827	25.7557	17.7051	29.4288
Rpl41	1353.15	1.41778	0.125761	11.2495	0.0238982	0.440922	1266.91	1856.06	1847.75	2253.68	1989.44	686.98	765.894	729.451	782.187
Tuba1b	290.218	0.941736	0.150264	11.0792	0.025688	0.462384	294.767	304.407	377.51	493.235	351.184	175.103	181.646	246.691	187.415
Rpl36	681.758	1.40446	0.142959	10.7583	0.0294184	0.493922	607.22	1143.58	988.409	863.649	1015.54	344.236	360.128	384.791	428.267
Rps2-ps10	142.51	2.96616	0.20481	10.8188	0.0286778	0.493922	143.257	283.016	232.314	272.937	220.847	32.8318	34.7928	40.1316	22.4588
Slfn2	86.8434	1.38802	0.245426	10.756	0.0294479	0.493922	56.5953	78.9812	137.667	179.358	133.957	55.7145	45.6374	47.2137	46.4666
Ctsz	172.034	0.859055	0.169666	10.5713	0.0318295	0.510656	127.339	232.007	233.389	202.753	248.001	136.302	126.971	116.854	124.685
Lgals1	347.26	1.68704	0.154043	10.6067	0.0313583	0.510656	329.549	500.215	492.591	614.107	524.965	158.189	141.882	161.707	202.13
Ckb	265.801	1.29424	0.166342	10.1993	0.0372015	0.574926	244.657	366.934	283.939	452.295	429.023	136.799	148.66	146.362	183.543
Rpl18a	1663.68	1.04627	0.127435	10.187	0.0373936	0.574926	1595.87	1788.6	2134.92	2571.45	2548.8	1024.25	1067.28	1098.9	1143.08
Fau	1412.76	1.10753	0.121732	10.0148	0.040179	0.593042	1325.86	1910.36	1846.68	1906.66	2107.1	816.815	835.932	974.962	990.513
Ptma	879.472	1.11203	0.13614	10.0228	0.0400446	0.593042	842.444	1286.74	1037.88	1487.5	1039.07	519.339	568.885	611.417	521.975
Plp2	51.7022	-2.72471	0.343236	9.93368	0.0415598	0.601394	35.9616	8.22721	19.3595	9.74773	18.1022	86.059	82.6895	94.4273	110.745
Trim30a	54.4515	1.21488	0.288057	9.68396	0.0461015	0.654287	29.4767	59.2359	60.2295	105.276	101.373	42.7808	34.341	27.1479	30.2033
mt-Co2	1115.66	-2.54996	0.188365	9.58911	0.0479482	0.667656	607.809	508.442	323.733	308.028	258.862	1684.87	1850.8	2280.42	2218
Stmn1	116.928	1.39169	0.200544	9.51547	0.0494303	0.675547	121.444	157.962	149.498	198.854	161.11	50.74	52.4152	99.1487	61.181
Prdx5	77.8004	0.578612	0.234427	9.39875	0.0518698	0.695999	96.094	105.308	110.779	93.5783	52.4965	86.5565	63.2597	47.2137	44.9177
Vim	259.587	-0.710085	0.16613	9.21248	0.0560025	0.738033	282.387	187.58	178.537	257.34	159.3	275.09	293.706	362.365	339.98
Rpl37rt	73.6419	1.81223	0.247129	9.0901	0.0588864	0.749278	73.1022	133.281	73.1358	163.762	92.3214	27.3598	27.5632	38.9513	33.301
Sod1	311.112	1.02572	0.14634	9.12659	0.058012	0.749278	262.932	429.461	422.682	434.749	412.731	202.96	198.364	227.806	208.325
Gpnmb	129.378	-3.5324	0.279747	8.8976	0.0637106	0.776711	21.8128	24.6816	13.9818	21.445	30.7738	165.651	232.705	276.2	377.154
Rbm3	385.026	1.40722	0.142383	8.87886	0.0641997	0.776711	371.406	549.578	624.881	590.713	483.33	210.422	221.861	212.461	200.581
Rpl28	1186.95	1.22011	0.12134	8.94888	0.0623901	0.776711	1203.24	1471.03	1602.53	1758.49	1801.17	654.646	678.234	707.024	806.195
Ifi35	41.3598	1.89942	0.306915	8.71682	0.0685809	0.803376	30.6558	36.1997	77.4379	79.9314	77.8396	16.4159	18.9779	20.0658	14.7144
Rpl38	924.653	1.20959	0.147812	8.73154	0.0681715	0.803376	821.81	1553.3	1245.46	1175.58	1258.11	500.933	515.115	592.531	659.051
Eif3f	359.304	1.61539	0.142661	8.67693	0.0697019	0.80375	344.877	533.123	551.745	557.57	535.826	177.093	179.838	179.412	174.25
Rpl36-ps12	119.35	2.02112	0.22006	8.61247	0.0715506	0.812374	111.422	245.171	174.235	189.106	159.3	43.2782	34.7928	67.2795	49.5644
Crip1	342.857	1.66331	0.152039	8.42213	0.0772829	0.853169	345.467	426.17	486.138	610.208	566.6	158.687	159.957	162.887	169.603
Gm9844	189.749	1.18491	0.184271	8.41661	0.0774557	0.853169	180.397	350.479	212.954	247.592	249.811	122.87	109.801	144.002	89.8354
Gpx4-ps2	86.3516	3.19139	0.262676	8.37625	0.0787283	0.854434	74.8708	164.544	140.894	198.854	130.336	14.9235	18.0742	12.9838	21.6844
H2-Ab1	1569.1	0.0823488	0.136002	8.23013	0.0835027	0.876994	1281.06	1364.07	1354.09	1986.59	1953.23	1501.8	1485.7	1542.71	1652.66
Pld4	124.657	0.636535	0.193349	8.20438	0.084372	0.876994	117.317	97.0811	155.951	183.257	179.212	81.582	91.2747	108.591	107.648
Rps26-ps1	115.185	0.31677	0.19054	8.23675	0.0832809	0.876994	97.8626	133.281	97.8729	159.863	130.336	106.952	80.4302	126.297	103.775
Rpl5	761.379	1.51593	0.136177	8.13631	0.0867108	0.888786	765.215	1326.23	1155.12	963.076	1069.84	393.484	386.788	393.054	399.613
Rpl13a	1566.93	1.2511	0.134666	8.01315	0.0910975	0.920958	1509.21	2529.05	2201.6	1898.86	2237.44	871.534	852.198	938.371	1064.08
Ap2s1	108.154	1.95326	0.205914	7.81722	0.098508	0.958823	103.758	149.735	143.045	191.056	209.986	43.7757	41.1188	43.6726	47.241
Atp5e	266.114	1.64355	0.157574	7.75387	0.101022	0.958823	255.268	416.297	409.776	442.547	352.994	122.87	128.327	132.198	134.753
Cd53	42.1264	-2.88786	0.379291	7.69793	0.103292	0.958823	26.529	14.809	11.8308	5.84864	9.05112	71.633	82.6895	68.4598	88.2865
Fxyd5	272.648	0.735919	0.168374	7.68222	0.103937	0.958823	269.417	251.753	286.09	465.942	376.527	182.565	199.72	204.199	217.618
Rpl24	670.965	1.20775	0.140699	7.69015	0.103611	0.958823	627.264	1123.84	907.744	859.75	887.01	394.479	384.077	435.546	418.974
Rps13-ps1	280.778	1.07227	0.154685	7.74679	0.101307	0.958823	248.783	434.397	337.715	407.455	365.665	173.61	177.127	199.478	182.769
Tcirg1	65.0959	1.29459	0.239773	7.77046	0.100358	0.958823	48.3418	83.9176	84.9666	97.4773	115.854	39.7961	33.8891	43.6726	37.9477
2410006H16Rik	68.6306	-0.201022	0.245259	2.0609	0.724559	0.999791	64.2592	67.4631	41.9455	74.0828	77.8396	72.1304	69.5857	81.4436	68.9254
5031439G07Rik	43.454	-0.237224	0.282623	0.231612	0.99379	0.999791	41.8569	44.427	39.7945	37.0414	38.0147	46.263	42.9262	54.2957	46.4666
Abracl	63.087	1.12652	0.250553	1.15931	0.884752	0.999791	68.3859	87.2085	64.5316	97.4773	95.9419	37.3088	42.0225	35.4102	39.4966
Actb	3601.88	0.540101	0.134878	3.26443	0.514587	0.999791	3546.64	3341.89	4806.53	4548.29	4465.82	3044.4	2956.49	2983.9	2722.94
Actg1	1042.14	0.160212	0.121543	2.16605	0.70525	0.999791	919.083	1105.74	1118.55	1138.54	1102.43	1024.75	1010.35	985.585	974.249
Actr2	65.3574	-0.931989	0.248157	1.35732	0.851578	0.999791	53.6476	52.6542	48.3987	35.0918	47.0658	98.4953	82.6895	84.9846	85.1887
Actr3	165.265	-0.163887	0.179543	1.93908	0.746963	0.999791	179.218	131.635	172.084	157.913	153.869	170.128	168.542	200.658	153.34
Ahnak	59.1998	0.188576	0.250866	1.42515	0.839812	0.999791	75.4603	49.3633	67.7582	62.3855	63.3579	50.74	47.4448	56.6564	59.6321
Aif1	79.5309	1.19121	0.237916	4.41817	0.352361	0.999791	67.2069	95.4357	101.099	120.872	135.767	59.1967	51.9633	37.7709	46.4666
Akr1a1	100.956	-1.33663	0.224256	2.49704	0.645167	0.999791	65.4383	72.3995	45.1721	68.2341	54.3067	140.281	130.134	147.543	185.092
Aldoa	135.788	-1.15153	0.199585	1.96637	0.741945	0.999791	87.8406	80.6267	114.006	87.7296	70.5987	195.996	209.209	177.051	199.032
Alox5ap	121.875	-1.67203	0.207677	6.79482	0.147136	0.999791	93.7359	57.5905	47.3232	66.2846	70.5987	193.508	168.994	195.937	202.904
Alyref	46.895	0.906088	0.302236	1.14664	0.886804	0.999791	53.0581	34.5543	76.3624	77.9819	54.3067	37.8063	29.8224	29.5085	28.6544
Anapc11	47.4339	1.19825	0.276623	1.39195	0.845593	0.999791	50.6999	49.3633	70.9847	79.9314	63.3579	29.3496	29.3706	25.9675	27.8799
Anapc5	57.9766	1.06332	0.248242	2.652	0.61764	0.999791	57.7743	74.0449	76.3624	85.7801	76.0294	33.3292	32.5336	47.2137	38.7221
Ankrd13a	78.2482	1.29982	0.222379	2.97343	0.562282	0.999791	77.2289	113.536	116.157	99.4269	115.854	44.7706	42.4744	43.6726	51.1132
Anp32b	55.1051	0.853438	0.255439	0.970801	0.914191	0.999791	59.5429	77.3358	75.2868	62.3855	65.1681	38.8012	37.504	34.2299	45.6921
Anxa1	43.9615	-2.39367	0.336911	2.57253	0.631697	0.999791	15.3279	13.1635	13.9818	11.6973	21.7227	73.6228	65.9708	80.2632	99.9031
Anxa2	64.7547	0.373002	0.244174	3.05267	0.549049	0.999791	66.0278	60.8814	83.8911	64.335	79.6499	42.2833	51.5115	63.7384	70.4743
Anxa5	68.4036	-0.370142	0.246334	1.92074	0.750333	0.999791	50.1104	41.1361	66.6826	64.335	76.0294	81.582	72.2968	76.7222	86.7376
Anxa6	61.9956	0.280391	0.296513	1.60103	0.808608	0.999791	69.565	31.2634	75.2868	85.7801	79.6499	62.1814	53.7707	35.4102	65.0532
Ap2m1	46.4806	-0.17089	0.275553	0.83329	0.93393	0.999791	53.0581	44.427	43.0211	35.0918	48.8761	45.7655	46.9929	50.7547	50.3388
Arf1	52.0624	-0.909851	0.274434	2.24871	0.690122	0.999791	45.9836	31.2634	27.9637	42.89	47.0658	61.1865	67.7782	73.1812	71.2488
Arf5	60.3902	0.158348	0.243772	0.42539	0.980346	0.999791	59.5429	69.1086	64.5316	56.5369	65.1681	56.212	62.356	54.2957	55.7599
Arhgap45	70.0785	0.677298	0.235644	3.88332	0.422026	0.999791	61.9011	67.4631	98.9484	109.175	76.0294	56.7094	54.2226	59.0171	47.241
Arhgdia	290.061	1.122	0.161309	5.75145	0.218495	0.999791	288.872	302.761	416.229	446.446	429.023	180.077	177.579	205.379	164.182
Arhgdib	221.186	0.601449	0.158564	1.63004	0.803384	0.999791	220.486	283.016	260.277	267.088	257.052	184.554	174.868	162.887	180.445
Arl6ip1	74.9236	1.05545	0.229914	5.09725	0.277464	0.999791	76.0499	83.9176	78.5134	140.367	104.993	41.7859	45.6374	51.935	51.1132
Arpc1b	147.661	-0.176867	0.206954	1.75659	0.780414	0.999791	156.816	98.7266	124.761	142.317	191.884	168.138	156.342	142.821	147.144
Arpc2	144.06	-0.616361	0.186857	1.43747	0.837657	0.999791	133.235	98.7266	105.402	126.721	130.336	182.565	163.571	179.412	176.573
Arpc3	91.8607	-0.596341	0.217516	1.70142	0.790461	0.999791	74.2813	87.2085	76.3624	62.3855	72.409	110.434	109.801	96.788	137.076
Arpc4	229.205	1.5367	0.159417	5.16117	0.271156	0.999791	241.709	322.507	329.111	362.616	338.512	105.46	108.445	127.477	127.009
Arpc5	121.9	0.433124	0.192405	2.07324	0.72229	0.999791	130.287	167.835	121.534	144.266	123.095	112.921	93.534	94.4273	109.196
Arpp19	67.6023	1.468	0.240967	3.29332	0.509992	0.999791	68.3859	77.3358	96.7974	122.821	101.373	35.8165	32.5336	35.4102	37.9477
Asah1	43.9758	-0.469754	0.321039	2.81184	0.58979	0.999791	34.7825	16.4544	49.4742	50.6882	38.0147	49.7451	56.9337	35.4102	64.2788
Atox1	163.809	0.94233	0.175822	5.93225	0.204265	0.999791	142.667	189.226	200.048	243.693	246.191	111.429	113.867	113.313	113.843
Atp1a1	46.9284	-0.174239	0.278646	1.75385	0.780915	0.999791	43.036	64.1723	38.7189	37.0414	39.8249	53.2273	51.5115	46.0333	48.7899
Atp1b3	103.147	1.17361	0.214314	1.25152	0.869546	0.999791	113.78	125.054	136.592	155.964	148.438	69.1457	73.2005	51.935	54.211
Atp5a1	140.774	0.660558	0.183964	1.53838	0.819822	0.999791	153.868	204.035	163.48	154.014	161.11	110.932	116.127	105.05	98.3543
Atp5b	109.167	-0.666363	0.212305	3.28131	0.511898	0.999791	107.295	105.308	86.0421	54.5873	94.1317	139.784	137.364	128.657	129.332
Atp5c1	92.1671	0.442022	0.209154	1.7758	0.776907	0.999791	93.7359	129.99	106.477	89.6792	97.7521	84.0692	76.3635	75.5418	75.8954
Atp5d	109.083	1.35313	0.212632	3.71395	0.4461	0.999791	103.168	138.217	165.631	181.308	146.628	65.6635	56.03	50.7547	74.3465
Atp5g1	56.4307	0.555001	0.250322	3.23908	0.518642	0.999791	45.3941	62.5268	66.6826	85.7801	61.5476	41.7859	49.704	47.2137	47.241
Atp5g2	84.7909	-0.617602	0.233766	1.30346	0.860788	0.999791	84.3034	72.3995	82.8155	56.5369	54.3067	92.5259	98.0525	116.854	105.324
Atp5g3	89.128	0.131983	0.212251	1.28797	0.863414	0.999791	80.7661	100.372	94.6463	77.9819	103.183	82.5769	80.4302	86.1649	96.0309
Atp5h	126.12	0.860378	0.200212	3.71366	0.446143	0.999791	124.392	200.744	126.912	144.266	181.022	80.0896	81.3339	97.9683	98.3543
Atp5j	59.4648	-0.13465	0.247985	3.3688	0.498105	0.999791	57.7743	46.0724	53.7763	77.9819	50.6863	54.7196	55.1263	75.5418	63.5043
Atp5j2	113.491	1.03619	0.196896	1.79562	0.773284	0.999791	116.728	157.962	141.969	161.812	146.628	65.1661	78.1709	75.5418	77.4443
Atp5k	76.4438	1.72936	0.228404	6.3436	0.174915	0.999791	73.1022	144.799	119.383	95.5278	112.234	41.2884	32.9854	33.0496	35.6244
Atp5l	160.379	1.04352	0.174126	2.09316	0.718629	0.999791	168.017	208.971	225.861	200.803	222.658	99.9877	109.801	107.411	99.9031
Atp5md	75.0521	0.47663	0.228532	2.29062	0.682478	0.999791	67.2069	65.8177	95.7218	101.376	92.3214	62.1814	60.0967	64.9188	65.8277
Atp5mpl	54.1537	-0.152541	0.266037	0.51894	0.971631	0.999791	52.4685	54.2996	40.87	66.2846	47.0658	54.2222	63.2597	55.476	53.4366
Atp5o	96.935	1.43906	0.205295	5.57137	0.233527	0.999791	87.8406	154.672	147.347	140.367	130.336	54.7196	52.867	55.476	48.7899
Atp5pb	52.8621	-1.0302	0.272706	2.04489	0.727502	0.999791	50.1104	32.9089	34.4168	40.9405	32.584	74.6177	78.6228	67.2795	64.2788
Atp6v0b	77.3675	1.13587	0.22751	4.25088	0.373117	0.999791	68.3859	85.563	123.686	115.023	108.613	50.74	51.0596	43.6726	49.5644
Atp6v0c	142.572	0.286696	0.198824	4.52484	0.339612	0.999791	101.4	182.644	164.556	175.459	126.716	121.876	133.297	119.214	157.986
Atp6v0e	44.9755	-1.21704	0.298125	3.39506	0.494013	0.999791	45.9836	31.2634	29.0392	23.3946	23.5329	55.7145	65.0671	67.2795	63.5043
Atp6v1f	48.0504	0.291788	0.279014	1.15664	0.885185	0.999791	51.879	42.7815	73.1358	42.89	50.6863	41.2884	41.5707	44.853	43.3688
Atp6v1g1	47.2548	-0.334069	0.284537	1.48825	0.82872	0.999791	40.6778	26.3271	48.3987	46.7891	48.8761	51.7349	46.0892	63.7384	52.6621
Atpif1	109.616	0.227315	0.195807	4.74985	0.31394	0.999791	86.6615	100.372	131.214	138.418	115.854	87.5514	107.541	107.411	111.52
B2m	341.856	-1.45369	0.15463	2.41286	0.660304	0.999791	171.554	154.672	202.199	204.702	219.037	501.431	543.13	539.416	540.561
Bag1	54.9763	1.45062	0.26249	4.00026	0.405971	0.999791	52.4685	67.4631	78.5134	97.4773	81.4601	23.8777	33.8891	24.7872	34.8499
BC005537	117.511	0.931144	0.192587	2.66697	0.615007	0.999791	111.422	153.026	149.498	155.964	162.92	79.5922	89.0154	80.2632	75.8954
Bin1	61.5295	1.95928	0.269405	2.53325	0.638692	0.999791	67.7964	78.9812	108.628	93.5783	103.183	26.3649	21.2372	35.4102	18.5866
Bloc1s2	45.9934	0.59229	0.303468	1.60419	0.808039	0.999791	51.879	27.9725	55.9274	60.436	76.0294	39.2986	29.3706	38.9513	34.0755
Bola2	44.8449	1.31606	0.282874	2.21919	0.695517	0.999791	45.3941	83.9176	59.1539	60.436	52.4965	25.8675	24.852	23.6068	27.8799
Bri3	60.9475	0.292332	0.243035	2.59985	0.626849	0.999791	52.4685	55.945	59.1539	79.9314	79.6499	52.7298	51.5115	61.3778	55.7599
Brk1	102.477	1.22829	0.223553	2.27894	0.684606	0.999791	100.81	106.954	151.649	157.913	161.11	73.6228	60.5486	55.476	54.211
Bsg	41.8274	0.436434	0.295039	0.412822	0.981414	0.999791	47.7522	54.2996	52.7008	42.89	38.0147	30.842	34.341	30.6889	44.9177
Bst2	74.0166	-1.65714	0.299944	2.27247	0.685785	0.999791	27.7081	14.809	39.7945	46.7891	57.9272	132.322	129.231	119.214	98.3543
Btf3	144.271	-0.390693	0.18599	1.3777	0.848061	0.999791	146.794	111.89	133.365	120.872	130.336	161.672	145.497	165.248	182.769
Btg1	66.2432	-0.730842	0.244091	5.43714	0.245311	0.999791	69.565	59.2359	53.7763	44.8396	39.8249	104.465	83.5932	69.6401	71.2488
Calm1	147.491	-0.385663	0.182169	3.41905	0.490293	0.999791	149.152	136.572	135.516	134.519	104.993	188.534	183.001	151.084	144.046
Calm2	57.159	-0.863374	0.266203	1.82883	0.767204	0.999791	50.1104	46.0724	36.5679	33.1423	47.0658	70.6381	60.5486	92.0666	78.2187
Calm3	52.5328	0.186996	0.26689	1.10003	0.894267	0.999791	46.5732	49.3633	59.1539	74.0828	45.2556	48.2528	45.1855	48.394	56.5343
Calr	109.517	-0.653883	0.202644	2.02563	0.731045	0.999791	92.5568	78.9812	77.4379	85.7801	106.803	137.296	134.653	118.034	154.114
Canx	57.7141	-0.385451	0.260609	1.66135	0.797726	0.999791	43.6255	51.0087	50.5497	46.7891	57.9272	78.0998	81.3339	56.6564	53.4366
Capg	71.7258	0.768678	0.233629	5.69678	0.222966	0.999791	73.6917	67.4631	97.8729	101.376	92.3214	37.3088	54.6745	49.5743	71.2488
Capns1	73.6221	0.585123	0.249238	1.82997	0.766995	0.999791	73.1022	55.945	92.4953	118.922	90.5112	60.689	55.1263	50.7547	65.0532
Caprin1	59.5324	0.0905023	0.244535	1.84844	0.76361	0.999791	49.5209	70.754	66.6826	58.4864	54.3067	63.1763	59.193	62.5581	51.1132
Capza2	61.3189	-0.736696	0.252573	0.777334	0.941461	0.999791	52.4685	37.8452	51.6253	46.7891	50.6863	77.1049	72.2968	75.5418	87.5121
Capzb	103.509	-0.00200682	0.202344	0.79767	0.93876	0.999791	110.243	116.826	92.4953	91.6287	110.424	103.967	103.475	97.9683	104.55
Ccdc12	43.0038	0.575899	0.293695	0.298201	0.98993	0.999791	48.3418	46.0724	46.2476	62.3855	48.8761	39.7961	32.9854	23.6068	38.7221
Ccdc88b	42.9248	1.5765	0.286573	2.02298	0.731531	0.999791	47.1627	59.2359	64.5316	56.5369	74.2192	20.3955	24.852	17.7051	21.6844
Ccl9	44.9992	-0.110255	0.28232	5.45783	0.243461	0.999791	47.7522	29.618	41.9455	62.3855	38.0147	35.319	37.504	59.0171	53.4366
Ccnd1	57.6058	0.498502	0.261125	2.83486	0.58583	0.999791	53.0581	70.754	87.1176	46.7891	66.9783	52.7298	51.5115	53.1154	36.3988
Ccnd3	42.5309	0.0144583	0.300314	1.34104	0.854374	0.999791	50.6999	41.1361	58.0784	40.9405	27.1534	44.2731	39.7632	36.5906	44.1432
Ccni	45.2944	-0.481193	0.296727	1.78177	0.775816	0.999791	44.215	42.7815	32.2658	56.5369	23.5329	57.7043	51.5115	47.2137	51.8877
Cct3	49.138	1.2086	0.26652	2.8718	0.579503	0.999791	48.9313	74.0449	73.1358	62.3855	65.1681	32.8318	33.8891	22.4265	29.4288
Cct4	92.4677	0.86946	0.217821	1.471	0.831767	0.999791	103.758	149.735	101.099	113.074	106.803	59.6941	60.5486	75.5418	61.9554
Cct5	96.6111	0.919403	0.205504	4.48031	0.344889	0.999791	88.4301	157.962	120.459	113.074	119.475	73.1253	62.356	64.9188	69.6999
Cct7	54.2557	0.827082	0.257919	1.46345	0.833095	0.999791	54.8267	65.8177	87.1176	62.3855	61.5476	39.2986	38.8595	38.9513	39.4966
Cct8	49.5643	0.233211	0.278665	2.82366	0.587755	0.999791	48.9313	72.3995	50.5497	56.5369	34.3943	45.268	35.2447	57.8367	44.9177
Cd24a	69.9502	0.417027	0.238801	1.63343	0.802771	0.999791	74.8708	55.945	78.5134	85.7801	99.5623	59.1967	58.2893	53.1154	64.2788
Cd37	44.8942	0.021406	0.312394	2.79782	0.592209	0.999791	47.1627	21.3908	57.0029	37.0414	68.7885	47.2579	46.9929	36.5906	41.8199
Cd47	60.3645	-0.404737	0.25725	0.899077	0.924693	0.999791	53.6476	51.0087	61.305	35.0918	63.3579	73.6228	68.2301	69.6401	67.3765
Cd52	406.011	-0.0630803	0.157487	1.6526	0.799309	0.999791	387.913	496.924	419.455	319.726	365.665	418.356	389.951	437.907	418.199
Cd68	49.2176	-2.08298	0.316833	2.2225	0.694911	0.999791	26.529	16.4544	23.6616	23.3946	14.4818	70.6381	71.8449	99.1487	96.8054
Cd74	3000.69	0.0949206	0.135394	5.37971	0.250507	0.999791	2730.13	2328.3	3129.78	3407.81	3750.78	2894.67	2760.83	2816.29	3187.61
Cdc37	64.1152	0.847644	0.253633	1.79864	0.77273	0.999791	63.0801	64.1723	98.9484	70.1837	97.7521	53.7247	45.6374	42.4923	41.0455
Cdc42	118.667	-0.5598	0.197634	0.683266	0.953376	0.999791	99.6312	108.599	84.9666	103.326	95.9419	148.24	141.431	128.657	157.212
Cfl1	360.395	-0.308732	0.150551	1.07197	0.898693	0.999791	365.511	284.662	351.697	350.918	300.497	415.372	393.114	390.693	391.094
Cfp	183.169	1.86899	0.177849	1.72462	0.78624	0.999791	221.665	284.662	296.845	298.281	240.76	76.11	74.5561	72.0008	83.6398
Chchd2	128.417	0.876213	0.1857	4.02395	0.402775	0.999791	123.802	169.481	160.253	191.056	146.628	85.0641	84.9487	106.231	88.2865
Chmp2a	44.8018	1.06459	0.277511	2.16542	0.705365	0.999791	45.3941	67.4631	53.7763	58.4864	61.5476	33.3292	25.7557	34.2299	23.2333
Clic1	137.446	0.126934	0.183355	3.45766	0.484345	0.999791	109.064	144.799	144.121	157.913	139.387	123.368	119.29	155.805	143.272
Clta	121.512	0.587285	0.203799	2.11944	0.713803	0.999791	108.474	118.472	158.102	163.762	152.059	111.926	91.2747	84.9846	104.55
Cltc	49.053	-0.277906	0.272215	0.977514	0.913186	0.999791	47.7522	34.5543	54.8518	44.8396	43.4454	49.2477	52.4152	57.8367	56.5343
Cmtm7	91.011	0.413465	0.216246	0.826755	0.934826	0.999791	100.81	120.117	115.081	95.5278	79.6499	76.11	77.2672	75.5418	78.9932
Cnbp	96.377	0.527913	0.212895	0.533514	0.970157	0.999791	113.78	133.281	98.9484	109.175	103.183	69.1457	75.4598	88.5256	75.8954
Cnn2	120.346	1.13375	0.200197	0.283387	0.990861	0.999791	146.204	136.572	180.688	155.964	170.161	80.5871	67.3264	74.3615	71.2488
Cope	43.692	0.550012	0.27846	1.68929	0.792662	0.999791	47.7522	59.2359	43.0211	62.3855	41.6352	37.8063	30.7261	36.5906	34.0755
Copz1	66.9526	1.88666	0.253548	2.09589	0.718127	0.999791	78.9975	103.663	103.251	107.225	95.9419	30.842	19.8816	27.1479	35.6244
Coro1a	424.324	0.572254	0.141978	1.10035	0.894216	0.999791	532.349	500.215	521.63	477.639	463.417	372.093	309.973	316.331	325.266
Coro1b	64.3798	-0.786789	0.258641	2.32124	0.676905	0.999791	57.1848	31.2634	48.3987	70.1837	45.2556	82.5769	78.6228	86.1649	79.7676
Cotl1	155.24	0.480507	0.1798	0.863184	0.929782	0.999791	169.196	153.026	179.613	183.257	199.125	130.332	114.771	139.28	128.558
Cox4i1	206.05	0.549111	0.167024	2.21713	0.695894	0.999791	217.538	294.534	254.9	208.602	215.417	170.626	168.09	162.887	161.859
Cox5a	62.5207	-0.235146	0.264535	1.78141	0.775881	0.999791	71.9231	78.9812	57.0029	50.6882	39.8249	60.1916	72.2968	56.6564	75.121
Cox5b	158.735	1.12713	0.174656	4.13363	0.388223	0.999791	154.458	197.453	231.238	239.794	206.366	97.5004	100.764	102.69	98.3543
Cox6a1	81.5371	-0.250309	0.219908	0.979581	0.912876	0.999791	65.4383	67.4631	82.8155	79.9314	74.2192	84.5667	85.4006	97.9683	96.0309
Cox6b1	92.8886	0.586541	0.222842	0.594798	0.96364	0.999791	94.915	100.372	117.232	134.519	94.1317	84.5667	71.8449	60.1974	78.2187
Cox6c	113.375	0.264974	0.215325	1.73101	0.785078	0.999791	117.907	164.544	105.402	99.4269	123.095	89.0437	90.371	109.772	120.813
Cox7a2	60.1432	-0.201315	0.247168	1.71426	0.788126	0.999791	62.4906	54.2996	54.8518	66.2846	47.0658	55.2171	62.8078	75.5418	62.7299
Cox7a2l	98.0308	0.291432	0.212003	0.750185	0.944999	0.999791	104.348	133.281	98.9484	103.326	92.3214	83.5718	79.5265	93.247	93.7076
Cox7b	65.5871	-0.31566	0.262223	1.65017	0.799748	0.999791	67.7964	82.2721	52.7008	64.335	36.2045	63.6737	74.5561	76.7222	72.0232
Cox7c	105.766	-0.600268	0.211929	0.496225	0.973867	0.999791	90.1987	95.4357	88.1932	83.8305	72.409	115.409	117.482	151.084	137.851
Cox8a	88.8587	-0.710763	0.236218	5.13748	0.27348	0.999791	95.5045	42.7815	90.3442	58.4864	77.8396	113.419	111.608	89.7059	120.039
Creg1	75.3918	-0.686907	0.244566	1.8126	0.770176	0.999791	54.8267	51.0087	67.7582	79.9314	41.6352	85.0641	89.9191	101.509	106.873
Csde1	43.1464	-0.468378	0.297489	0.962234	0.915467	0.999791	44.8046	49.3633	33.3413	37.0414	25.3431	46.7604	50.6078	48.394	52.6621
Csf2rb	57.2025	0.407104	0.253204	6.14173	0.188811	0.999791	48.3418	77.3358	70.9847	46.7891	70.5987	62.1814	60.5486	37.7709	40.271
Csk	64.1043	0.444483	0.258623	4.97201	0.290181	0.999791	67.7964	36.1997	73.1358	103.326	86.8908	47.7553	50.1559	59.0171	52.6621
Ctbp1	68.2925	1.51552	0.237712	4.16351	0.384329	0.999791	72.5127	102.017	109.704	109.175	81.4601	36.3139	42.9262	31.8692	28.6544
Ctsa	83.2845	0.72528	0.219552	3.43799	0.487369	0.999791	73.6917	102.017	109.704	116.973	90.5112	55.7145	56.4819	75.5418	68.9254
Ctsh	73.9422	-0.748687	0.243729	5.74746	0.218819	0.999791	89.6092	59.2359	70.9847	42.89	41.6352	87.5514	94.4377	88.5256	90.6098
Ctsl	43.9133	-1.36307	0.306282	3.1725	0.529383	0.999791	26.529	21.3908	18.2839	31.1928	34.3943	48.2528	70.4894	64.9188	79.7676
Ctss	221.143	-1.66344	0.171252	5.48837	0.240754	0.999791	125.571	88.8539	105.402	134.519	119.475	301.455	321.721	383.611	409.68
Cyba	243.784	0.610234	0.159598	4.87422	0.300448	0.999791	211.643	304.407	324.809	292.432	275.154	219.376	190.231	172.33	203.679
Cycs	48.5248	-0.526896	0.275173	0.370297	0.984836	0.999791	44.8046	36.1997	38.7189	50.6882	36.2045	56.212	59.193	54.2957	60.4066
Cyrib	77.8703	0.637879	0.231537	0.800179	0.938424	0.999791	84.8929	75.6904	105.402	89.6792	104.993	68.1508	65.0671	54.2957	52.6621
Cyth4	94.4614	1.2072	0.21633	3.52995	0.473339	0.999791	113.191	90.4993	124.761	132.569	170.161	52.2324	55.5782	50.7547	60.4066
Cytip	50.6469	-1.52172	0.289548	3.59333	0.46383	0.999791	40.0883	21.3908	26.8882	33.1423	25.3431	81.0845	64.1634	93.247	70.4743
D8Ertd738e	47.4806	1.16875	0.273404	5.56753	0.233857	0.999791	47.7522	52.6542	77.4379	83.8305	48.8761	28.8522	28.4669	37.7709	21.6844
Dazap1	41.3868	1.45307	0.287174	4.41756	0.352435	0.999791	37.1406	60.8814	49.4742	72.1332	63.3579	21.8878	18.0742	22.4265	27.1055
Dazap2	110.122	0.702254	0.204318	1.71484	0.78802	0.999791	104.348	123.408	129.063	163.762	135.767	85.0641	91.7266	72.0008	85.9632
Dbnl	63.6441	0.852226	0.24063	0.13151	0.997931	0.999791	78.9975	74.0449	78.5134	81.881	83.2703	48.7502	40.6669	44.853	41.8199
Ddb1	53.2621	1.03011	0.26426	3.62614	0.45896	0.999791	54.8267	97.0811	66.6826	64.335	56.117	36.8114	31.178	43.6726	28.6544
Ddost	51.5416	0.518688	0.259448	2.11881	0.713917	0.999791	58.9534	60.8814	62.3805	44.8396	70.5987	40.791	44.7336	34.2299	46.4666
Ddx39b	55.8704	0.288996	0.256095	0.833835	0.933855	0.999791	69.565	62.5268	67.7582	50.6882	56.117	44.2731	51.5115	55.476	44.9177
Ddx5	143.252	0.262535	0.180779	0.275179	0.99136	0.999791	157.995	146.444	151.649	154.014	164.73	138.291	119.742	126.297	130.106
Ddx6	55.5328	1.00412	0.269303	0.375895	0.984402	0.999791	66.0278	83.9176	54.8518	87.7296	65.1681	31.3394	39.7632	33.0496	37.9477
Dek	41.4757	-0.134854	0.29523	0.382232	0.983906	0.999791	38.9092	46.0724	37.6434	44.8396	30.7738	34.8216	46.5411	47.2137	46.4666
Dynlrb1	45.7517	0.764344	0.285294	3.35312	0.50056	0.999791	34.7825	55.945	46.2476	79.9314	57.9272	35.8165	35.2447	27.1479	38.7221
Edf1	64.9187	1.21238	0.237029	5.21302	0.26613	0.999791	54.2371	85.563	97.8729	103.326	83.2703	40.791	37.9558	44.853	36.3988
Eef1a1	2664.33	0.389181	0.116245	1.6874	0.793005	0.999791	2658.21	2899.27	2974.91	3269.39	2948.86	2195.25	2275.99	2327.63	2429.43
Eef1b2	346.59	-0.344087	0.17833	1.52076	0.822958	0.999791	345.467	393.261	282.863	233.946	314.979	334.785	356.062	432.005	425.944
Eef1g	283.983	1.04139	0.150932	4.86038	0.301926	0.999791	294.767	347.188	438.815	387.96	347.563	164.656	197.009	193.576	184.317
Eef2	447.488	-0.169883	0.161988	2.5873	0.629075	0.999791	393.219	510.087	436.664	296.331	477.899	465.117	464.507	491.022	492.546
Efhd2	51.2948	-0.913177	0.283885	2.60883	0.625261	0.999791	38.3197	24.6816	26.8882	50.6882	48.8761	67.6533	62.8078	74.3615	67.3765
Ehmt2	46.1272	1.30438	0.283235	2.12891	0.712063	0.999791	53.6476	46.0724	84.9666	56.5369	70.5987	25.8675	27.1113	24.7872	25.5566
Eif1	150.407	-0.607715	0.185164	1.09112	0.895678	0.999791	127.929	129.99	107.553	118.922	128.526	190.524	176.675	212.461	161.084
Eif3b	59.7104	1.85749	0.261017	2.86952	0.579894	0.999791	60.1325	110.245	81.74	103.326	79.6499	23.3802	26.6594	23.6068	28.6544
Eif3c	43.05	-0.0654032	0.293511	1.19008	0.879729	0.999791	40.6778	54.2996	40.87	48.7387	27.1534	40.791	50.6078	42.4923	41.8199
Eif3d	53.6181	1.08957	0.257211	2.6291	0.621676	0.999791	49.5209	70.754	67.7582	68.2341	88.701	37.3088	34.341	31.8692	34.0755
Eif3e	62.269	-0.412394	0.258565	1.78754	0.77476	0.999791	68.3859	70.754	51.6253	48.7387	39.8249	64.1712	67.3264	81.4436	68.151
Eif3g	42.6564	0.594216	0.297624	3.42481	0.489404	0.999791	38.9092	55.945	39.7945	52.6378	56.117	24.3751	31.6298	54.2957	30.2033
Eif3h	85.8071	-0.309388	0.225614	0.427799	0.980138	0.999791	84.3034	95.4357	76.3624	66.2846	68.7885	86.5565	98.5044	103.87	92.1587
Eif3i	42.2982	-0.085485	0.299256	2.20722	0.697708	0.999791	48.9313	31.2634	57.0029	46.7891	27.1534	38.8012	42.9262	43.6726	44.1432
Eif3k	140.551	0.963548	0.188631	2.22858	0.693801	0.999791	141.488	213.908	189.293	185.207	153.869	94.0183	88.5636	95.6077	103.001
Eif3l	52.8618	0.370107	0.26213	0.416584	0.981097	0.999791	54.8267	55.945	64.5316	70.1837	47.0658	43.2782	44.7336	44.853	50.3388
Eif3m	82.6457	1.1946	0.216894	4.3186	0.364601	0.999791	80.7661	125.054	124.761	95.5278	115.854	52.2324	53.3189	41.3119	54.9855
Eif4a1	259.628	1.03763	0.157718	4.19848	0.379811	0.999791	249.962	314.28	342.017	378.212	371.096	173.61	180.29	169.969	157.212
Eif4a2	56.7185	0.0431305	0.248842	1.28743	0.863505	0.999791	50.6999	54.2996	51.6253	66.2846	61.5476	50.74	54.2226	63.7384	57.3088
Eif4b	65.0314	-0.140969	0.240128	1.032	0.904906	0.999791	66.6173	54.2996	72.0603	68.2341	52.4965	65.1661	70.9412	69.6401	65.8277
Eif4g2	69.148	-0.426394	0.236851	2.984	0.560506	0.999791	82.5348	60.8814	60.2295	54.5873	54.3067	85.5616	76.8153	66.0991	81.3165
Eif4h	63.1841	0.495579	0.243854	0.575997	0.965693	0.999791	71.3336	72.3995	60.2295	85.7801	74.2192	47.2579	55.1263	54.2957	48.0155
Eif5a	138.82	-0.401577	0.197658	2.40656	0.661441	0.999791	139.13	92.1448	151.649	124.771	110.424	151.225	150.016	178.232	151.791
Elob	124.202	1.46354	0.205457	5.00744	0.286535	0.999791	117.907	177.708	183.915	200.803	171.971	64.1712	81.3339	47.2137	72.7976
Emc10	50.5035	1.95315	0.274807	6.22799	0.182757	0.999791	48.3418	64.1723	64.5316	91.6287	103.183	19.4006	17.1705	25.9675	20.1355
Emp3	101.896	0.45897	0.214409	2.48979	0.646465	0.999791	104.937	87.2085	129.063	103.326	152.059	76.11	85.8524	97.9683	80.5421
Eno1	122.311	0.283905	0.191557	2.613	0.624521	0.999791	114.37	113.536	164.556	128.67	135.767	109.937	122.001	107.411	104.55
Epn1	62.6036	1.12068	0.261943	3.78338	0.436116	0.999791	67.2069	51.0087	97.8729	87.7296	104.993	39.2986	33.8891	31.8692	49.5644
Erp29	116.553	0.765571	0.236081	2.20053	0.698933	0.999791	126.16	218.844	154.876	99.4269	112.234	75.1151	79.9783	95.6077	86.7376
Esd	50.4328	-0.935727	0.282651	0.830272	0.934344	0.999791	35.372	36.1997	27.9637	37.0414	43.4454	53.7247	77.2672	73.1812	69.6999
Etfb	54.0745	1.62039	0.265225	3.54537	0.471014	0.999791	54.2371	98.7266	79.5889	85.7801	63.3579	28.3547	29.8224	21.2461	25.5566
Fabp5	70.0675	-0.664159	0.251459	0.799091	0.93857	0.999791	50.6999	52.6542	67.7582	56.5369	45.2556	83.0743	81.3339	77.9025	115.392
Fbl	81.6595	0.828767	0.221474	0.61855	0.96098	0.999791	100.81	106.954	97.8729	103.326	97.7521	54.7196	66.8745	57.8367	48.7899
Fcer1g	105.123	-0.562429	0.208406	1.57278	0.813677	0.999791	103.758	83.9176	101.099	72.1332	81.4601	111.926	128.327	133.379	130.106
Fcgrt	44.9736	0.926982	0.300297	5.49676	0.240015	0.999791	40.6778	41.1361	45.1721	54.5873	103.183	31.3394	32.5336	23.6068	32.5266
Fes	53.815	1.03558	0.275806	2.14815	0.708533	0.999791	62.4906	62.5268	57.0029	60.436	106.803	39.2986	35.6965	28.3282	31.7522
Fgl2	50.4558	-1.13139	0.278164	1.46714	0.832445	0.999791	30.0662	24.6816	31.1903	35.0918	43.4454	66.6584	72.7487	72.0008	78.2187
Fis1	68.9883	1.2135	0.233556	5.80798	0.213955	0.999791	66.6173	70.754	98.9484	105.276	112.234	34.8216	37.0521	44.853	50.3388
Flna	45.4714	-1.13524	0.291351	2.71345	0.606864	0.999791	43.6255	23.0362	30.1147	29.2432	32.584	59.1967	67.7782	57.8367	65.8277
Fth1	1173.11	-1.62761	0.133507	2.08702	0.719758	0.999791	563.594	600.587	630.258	604.36	595.564	1673.92	1886.49	1743.36	2259.82
Ftl1	1289.34	-0.607886	0.125683	7.23572	0.123944	0.999791	824.758	883.603	1221.8	1093.7	1080.7	1459.02	1649.27	1637.13	1754.11
Fuca1	44.1203	0.568317	0.295316	2.14696	0.708751	0.999791	41.8569	52.6542	45.1721	66.2846	47.0658	25.37	35.6965	31.8692	51.1132
G3bp1	48.3811	0.276294	0.266784	1.48974	0.828458	0.999791	43.6255	65.8177	54.8518	46.7891	47.0658	47.7553	42.9262	40.1316	46.4666
Gabarap	110.131	-0.114543	0.202022	2.43692	0.655966	0.999791	99.6312	80.6267	131.214	116.973	101.373	108.444	123.808	114.493	114.618
Gapdh	226.966	-1.47823	0.18394	5.06057	0.281139	0.999791	173.913	105.308	165.631	122.821	101.373	337.272	333.921	369.447	333.01
Gas5	116.514	-0.229194	0.204173	2.20109	0.698829	0.999791	104.937	143.154	103.251	77.9819	112.234	130.83	126.068	123.936	126.234
Gdi2	252.263	1.00008	0.161393	6.9578	0.138135	0.999791	225.202	294.534	298.996	397.708	378.337	171.123	165.379	164.067	175.024
Glipr1	42.3348	-1.81167	0.319206	1.76792	0.778345	0.999791	25.35	21.3908	17.2084	19.4955	19.9125	59.6941	60.5486	86.1649	71.2488
Glrx3	46.9595	1.19674	0.280337	2.09275	0.718704	0.999791	51.2895	87.2085	58.0784	52.6378	59.7374	28.8522	23.4965	34.2299	27.1055
Gltp	47.8321	-0.528224	0.287636	0.540647	0.969425	0.999791	45.9836	52.6542	37.6434	27.2937	39.8249	50.2426	57.3856	61.3778	58.0832
Gm10275	201.402	0.479297	0.170655	1.63041	0.803316	0.999791	195.136	276.434	219.407	228.097	217.227	157.195	162.216	188.855	168.054
Gm10925	118.834	-3.86833	0.318806	2.17872	0.702928	0.999791	24.1709	21.3908	19.3595	11.6973	10.8613	211.914	184.357	286.823	298.935
Gm11808	147.818	0.10573	0.179869	1.89357	0.755326	0.999791	145.025	138.217	150.574	165.711	157.49	136.302	121.549	165.248	150.242
Gm15500	118.703	-0.371021	0.23437	2.53031	0.639217	0.999791	101.989	162.899	109.704	62.3855	92.3214	129.835	128.779	151.084	129.332
Gm28437	304.996	-1.77421	0.159059	3.1294	0.536409	0.999791	184.524	138.217	152.725	146.216	139.387	444.224	481.226	548.859	509.583
Gm28661	66.1987	-2.70292	0.319718	2.33166	0.675012	0.999791	29.4767	29.618	17.2084	11.6973	16.292	107.449	111.156	140.461	132.43
Gm2a	550.212	0.679062	0.13888	6.44184	0.168492	0.999791	526.454	542.996	713.074	721.332	749.433	395.971	383.625	449.71	469.312
Gm43305	64.6353	-1.73926	0.297582	1.18799	0.880073	0.999791	38.9092	18.0999	43.0211	21.445	43.4454	110.932	95.3414	114.493	96.0309
Gm47283	75.3332	1.49133	0.233982	3.39163	0.494547	0.999791	86.6615	123.408	131.214	91.6287	88.701	40.791	39.7632	44.853	30.9777
Gmfg	80.7227	1.2066	0.218542	2.40276	0.662128	0.999791	93.7359	120.117	93.5708	122.821	104.993	50.2426	40.6669	53.1154	47.241
Gnai2	305.555	0.581854	0.150924	0.604174	0.962599	0.999791	331.318	342.252	361.377	370.414	374.716	263.649	223.668	252.593	230.01
Gnas	88.9309	-1.63458	0.252158	3.23023	0.520062	0.999791	66.0278	64.1723	41.9455	25.3441	48.8761	129.337	137.364	146.362	140.949
Gnb1	64.3383	-0.0629759	0.244377	1.23784	0.87183	0.999791	63.6697	54.2996	72.0603	64.335	59.7374	55.7145	61.0004	68.4598	79.7676
Gnb2	121.692	0.687721	0.192254	1.60128	0.808561	0.999791	132.645	120.117	161.329	146.216	166.541	86.059	89.4673	99.1487	93.7076
Gng10	68.2589	-0.323374	0.237229	2.9893	0.559617	0.999791	86.072	60.8814	53.7763	64.335	56.117	76.6075	68.682	69.6401	78.2187
Gngt2	52.0364	0.609448	0.26198	0.833472	0.933905	0.999791	52.4685	55.945	55.9274	62.3855	77.8396	40.2935	40.6669	44.853	37.9477
Gpi1	162.896	0.481622	0.175075	1.59586	0.809537	0.999791	156.226	174.417	202.199	196.904	188.263	131.825	124.712	142.821	148.693
Gpsm3	57.3621	0.768069	0.249845	0.725845	0.948104	0.999791	61.3115	74.0449	75.2868	64.335	72.409	38.3037	46.9929	44.853	38.7221
Gpx1	519.457	1.19871	0.135361	2.02495	0.731171	0.999791	603.093	709.186	688.337	758.374	678.834	299.466	283.313	324.594	329.913
Gpx4	75.3911	0.398192	0.238086	2.4577	0.652226	0.999791	75.4603	70.754	118.308	89.6792	65.1681	59.6941	62.8078	70.8205	65.8277
Grb2	51.3688	-0.187324	0.268872	2.3414	0.673243	0.999791	58.9534	41.1361	61.305	46.7891	39.8249	58.2018	60.5486	43.6726	51.8877
Grcc10	96.7318	1.02205	0.207208	0.719222	0.948937	0.999791	114.37	133.281	130.139	116.973	124.905	64.6686	55.5782	60.1974	70.4743
Grk2	66.2122	-0.0652418	0.245961	2.4726	0.649549	0.999791	67.7964	78.9812	57.0029	46.7891	74.2192	76.11	52.867	75.5418	66.6021
Gsn	165.113	1.59107	0.184225	6.07902	0.193324	0.999791	173.913	195.808	230.163	278.785	280.585	83.5718	67.7782	97.9683	77.4443
H13	73.6722	1.03382	0.235027	2.15277	0.707684	0.999791	80.7661	78.9812	95.7218	93.5783	124.905	51.7349	49.2522	37.7709	50.3388
H2-Aa	1041.96	-1.08323	0.165783	4.42094	0.352025	0.999791	771.11	431.106	746.415	768.121	863.477	1469.47	1330.71	1525	1472.22
H2-D1	163.334	-1.08875	0.181314	1.82395	0.768098	0.999791	102.579	100.372	111.855	109.175	114.044	214.401	220.053	217.183	280.348
H2-DMa	161.434	0.49856	0.175561	3.27648	0.512668	0.999791	188.651	141.508	193.595	196.904	209.986	116.404	126.519	132.198	147.144
H2-DMb1	88.1404	-0.848908	0.237226	1.13705	0.88835	0.999791	80.1766	77.3358	61.305	46.7891	66.9783	102.475	106.186	142.821	109.196
H2-DMb2	42.7141	1.50375	0.298474	2.36481	0.668996	0.999791	47.7522	57.5905	66.6826	52.6378	68.7885	16.4159	17.1705	29.5085	27.8799
H2-Eb1	880.586	-0.539042	0.153735	3.36772	0.498275	0.999791	764.626	518.314	787.285	725.231	917.784	1093.4	1013.06	995.028	1110.55
H2-Oa	69.4503	1.62942	0.259625	5.45697	0.243538	0.999791	78.408	72.3995	86.0421	130.62	126.716	29.8471	32.5336	21.2461	47.241
H2-T23	85.7503	-0.6547	0.217231	0.783055	0.940705	0.999791	66.0278	72.3995	66.6826	62.3855	72.409	114.414	102.119	99.1487	116.166
H2aj	55.9234	1.32232	0.266851	6.1889	0.185478	0.999791	62.4906	121.763	81.74	62.3855	50.6863	35.319	30.7261	31.8692	26.3311
H2az1	219.098	0.635019	0.164425	4.3749	0.35764	0.999791	227.56	246.816	230.163	321.675	264.293	153.712	177.127	201.838	148.693
H3f3a	285.446	-0.523383	0.153336	3.56602	0.467911	0.999791	300.073	230.362	234.465	265.138	202.745	326.825	331.662	349.381	328.364
H3f3b	190.834	0.396955	0.166452	3.18097	0.52801	0.999791	180.987	217.198	228.012	233.946	191.884	148.24	167.186	195.937	154.114
Hcls1	97.6673	1.2365	0.218533	2.88356	0.577497	0.999791	115.549	90.4993	145.196	148.166	153.869	55.2171	48.8003	56.6564	65.0532
Hdgf	43.8574	0.374388	0.281529	1.21095	0.876293	0.999791	45.9836	54.2996	50.5497	52.6378	38.0147	39.2986	30.7261	46.0333	37.1733
Hexa	108.623	0.98079	0.200382	6.72565	0.151116	0.999791	88.4301	139.863	151.649	134.519	161.11	64.6686	66.4227	84.9846	85.9632
Hint1	62.413	-0.831911	0.25354	1.99394	0.736873	0.999791	52.4685	47.7178	36.5679	38.9909	61.5476	77.6024	75.9116	82.6239	88.2865
Hmga1	54.3588	-0.732827	0.268457	0.409235	0.981714	0.999791	47.7522	32.9089	46.2476	46.7891	39.8249	71.633	63.2597	64.9188	75.8954
Hmgb1	67.1542	-1.17991	0.248657	3.2172	0.522157	0.999791	63.6697	42.7815	41.9455	42.89	38.0147	87.0539	99.8599	96.788	91.3843
Hmgb2	92.3686	-0.150193	0.217612	3.3385	0.502856	0.999791	91.9673	93.7902	82.8155	116.973	59.7374	102.972	85.8524	105.05	92.1587
Hmgn1	67.0225	1.28137	0.242206	2.40765	0.661246	0.999791	68.3859	98.7266	90.3442	95.5278	92.3214	29.8471	37.504	44.853	45.6921
Hmgn2	150.917	0.832832	0.184336	3.51069	0.476255	0.999791	143.257	222.135	187.142	191.056	175.592	99.4902	109.801	132.198	97.5798
Hnrnpa1	116.375	-0.251472	0.199175	3.81304	0.4319	0.999791	125.571	136.572	104.326	101.376	79.6499	139.784	115.675	127.477	116.941
Hnrnpa2b1	159.618	-0.00395706	0.181992	2.60853	0.625313	0.999791	182.166	174.417	158.102	181.308	115.854	165.154	158.601	152.264	148.693
Hnrnpa3	126.509	-0.100319	0.191784	2.23578	0.692484	0.999791	148.563	121.763	115.081	113.074	128.526	121.876	145.949	109.772	133.979
Hnrnpab	112.168	0.527496	0.197705	2.58601	0.629303	0.999791	112.011	123.408	145.196	138.418	121.285	99.4902	92.6303	105.05	72.0232
Hnrnpf	105.116	0.231028	0.19886	0.846526	0.932104	0.999791	97.8626	106.954	126.912	113.074	110.424	93.5208	96.697	99.1487	101.452
Hnrnpk	102.381	-0.0803962	0.213262	1.24326	0.870926	0.999791	101.4	129.99	88.1932	105.276	77.8396	104.465	103.927	102.69	107.648
Hnrnpl	48.2142	-0.549325	0.27956	0.298619	0.989903	0.999791	44.8046	39.4906	36.5679	50.6882	32.584	56.7094	59.193	51.935	61.9554
Hnrnpm	63.3005	0.990021	0.240609	1.27943	0.864855	0.999791	67.2069	85.563	87.1176	89.6792	72.409	46.7604	42.9262	37.7709	40.271
Hnrnpu	87.8071	-0.237615	0.213972	0.579286	0.965337	0.999791	87.8406	78.9812	73.1358	87.7296	83.2703	90.5361	96.2451	102.69	89.8354
Hnrnpul1	45.0246	0.0428548	0.28582	1.45784	0.834082	0.999791	45.9836	47.7178	61.305	31.1928	41.6352	43.2782	46.9929	48.394	38.7221
Hsp90aa1	118.079	1.31361	0.192276	3.36982	0.497946	0.999791	116.728	169.481	172.084	163.762	168.351	66.6584	67.7782	74.3615	63.5043
Hsp90ab1	146.986	-1.02988	0.18531	3.79286	0.434764	0.999791	135.593	105.308	98.9484	101.376	85.0805	207.935	202.883	200.658	185.092
Hsp90b1	79.5852	-0.393884	0.242972	4.84253	0.303839	0.999791	88.4301	108.599	55.9274	50.6882	59.7374	92.5259	77.7191	89.7059	92.9332
Hspa5	76.7307	-0.607082	0.229219	0.457177	0.977534	0.999791	71.3336	55.945	59.1539	66.2846	65.1681	94.5157	99.4081	89.7059	89.0609
Hspa8	501.34	0.200292	0.154594	4.59941	0.330923	0.999791	456.299	709.186	570.029	417.203	485.14	479.045	466.766	479.219	449.177
Hspe1	81.0816	-0.302996	0.223418	2.05131	0.726322	0.999791	68.9755	62.5268	63.4561	87.7296	83.2703	93.0234	80.882	106.231	83.6398
Id2	148.848	-1.67628	0.20319	3.25167	0.516625	0.999791	97.2731	82.2721	55.9274	76.0323	85.0805	271.608	237.224	228.986	205.227
Ifi27l2a	160.341	2.51751	0.631987	5.60126	0.230971	0.999791	58.3639	69.1086	233.389	395.758	510.483	52.7298	36.6003	42.4923	44.1432
Ifitm1	100.369	0.368195	0.273737	1.05486	0.901367	0.999791	94.3254	74.0449	96.7974	140.367	144.818	128.84	88.1117	55.476	80.5421
Ifitm2	88.7031	0.0367943	0.236505	5.02512	0.28473	0.999791	77.8185	49.3633	94.6463	124.771	101.373	82.0794	73.6524	88.5256	106.099
Ifitm3	170.675	-0.205762	0.189409	5.4154	0.247267	0.999791	143.257	98.7266	168.858	194.955	191.884	171.621	167.638	190.035	209.1
Ifnar2	45.1436	-0.425735	0.286407	1.09209	0.895525	0.999791	44.8046	36.1997	35.4924	38.9909	43.4454	67.1559	49.2522	46.0333	44.9177
Ifngr1	107.701	0.378282	0.213058	4.25715	0.372322	0.999791	112.011	105.308	81.74	144.266	161.11	87.5514	88.5636	84.9846	103.775
Ighm	77.4712	-0.201906	0.231607	5.11904	0.2753	0.999791	106.116	72.3995	64.5316	87.7296	52.4965	89.5412	77.2672	74.3615	72.7976
Impdh2	63.372	0.825359	0.259441	2.0744	0.722077	0.999791	68.3859	90.4993	110.779	56.5369	63.3579	43.2782	43.8299	47.2137	46.4666
Iqgap1	46.5753	-0.416901	0.285404	0.629019	0.959785	0.999791	43.036	47.7178	30.1147	46.7891	38.0147	50.2426	53.3189	47.2137	62.7299
Irf2bp2	45.7448	-0.734568	0.296067	1.68198	0.793989	0.999791	43.6255	21.3908	44.0966	40.9405	32.584	54.7196	54.2226	54.2957	65.8277
Irf8	215.003	-0.863685	0.166556	0.521445	0.97138	0.999791	167.428	143.154	159.178	155.964	168.351	300.46	269.306	271.479	299.709
Itgb2	45.8022	-2.2406	0.332075	3.65455	0.454771	0.999791	30.6558	19.7453	19.3595	9.74773	16.292	80.0896	69.5857	88.5256	78.2187
Itgb7	163.371	1.04026	0.175646	5.74666	0.218884	0.999791	176.271	171.126	206.501	237.845	257.052	95.5106	97.1488	100.329	128.558
Itm2b	160.944	-0.924936	0.181912	0.746456	0.945479	0.999791	113.78	118.472	107.553	113.074	121.285	192.016	228.639	211.281	242.401
Itm2c	87.4146	1.07104	0.242635	3.43572	0.48772	0.999791	78.9975	82.2721	107.553	142.317	152.059	65.1661	57.3856	43.6726	57.3088
Ivns1abp	57.9733	0.15783	0.251242	0.269719	0.991684	0.999791	64.8487	55.945	61.305	64.335	59.7374	62.1814	54.6745	48.394	50.3388
Jpt1	100.659	1.85551	0.207788	5.55201	0.235196	0.999791	98.4522	159.608	134.441	175.459	164.73	46.263	41.1188	42.4923	43.3688
Jund	44.3783	-0.0847221	0.294843	7.41825	0.115369	0.999791	21.8128	23.0362	46.2476	64.335	54.3067	44.7706	49.704	44.853	50.3388
Kctd12	60.4323	-0.672938	0.265055	4.82847	0.305355	0.999791	62.4906	55.945	30.1147	37.0414	66.9783	78.0998	70.4894	63.7384	78.9932
Krtcap2	43.4561	0.413096	0.280144	0.958573	0.916011	0.999791	42.4464	51.0087	48.3987	44.8396	54.3067	29.8471	40.6669	37.7709	41.8199
Lamp1	88.2876	-0.60908	0.218793	1.21688	0.875312	0.999791	83.7138	69.1086	78.5134	76.0323	57.9272	98.4953	113.416	107.411	109.971
Laptm4a	43.216	-0.292707	0.299582	1.3004	0.861308	0.999791	29.4767	55.945	30.1147	42.89	34.3943	42.7808	51.5115	48.394	53.4366
Laptm5	444.885	0.861878	0.152234	2.39608	0.663335	0.999791	456.889	465.66	571.104	606.309	651.681	333.79	319.461	296.266	302.807
Lars2	125.532	-1.56652	0.489671	2.8987	0.574919	0.999791	53.0581	26.3271	108.628	48.7387	114.044	198.98	154.986	186.494	238.528
Lbh	52.7121	1.04986	0.265573	0.386202	0.983591	0.999791	62.4906	72.3995	58.0784	79.9314	68.7885	32.8318	34.7928	27.1479	37.9477
Lcp1	152.64	-0.215074	0.191266	5.51683	0.238254	0.999791	184.524	180.999	130.139	144.266	99.5623	175.6	167.638	136.92	154.114
Ldha	100.768	-0.664262	0.209984	0.389866	0.983298	0.999791	89.0196	85.563	76.3624	83.8305	70.5987	121.378	121.549	119.214	139.4
Lgals3	525.025	-0.865594	0.137119	5.59955	0.231116	0.999791	295.356	350.479	407.624	374.313	436.264	671.062	672.812	721.189	796.127
Lgmn	51.2793	0.282281	0.269913	4.46502	0.346715	0.999791	33.6034	55.945	51.6253	79.9314	48.8761	40.2935	47.8966	46.0333	57.3088
Limd2	101.234	1.67405	0.231127	0.875276	0.928081	0.999791	129.697	113.536	181.764	173.51	128.526	53.2273	44.2818	37.7709	48.7899
Lipa	54.6906	-2.40727	0.311965	1.77361	0.777306	0.999791	19.4546	14.809	15.0574	23.3946	23.5329	80.0896	110.704	94.4273	110.745
Litaf	47.022	-0.32934	0.284705	2.37201	0.667691	0.999791	31.2453	27.9725	46.2476	60.436	41.6352	52.7298	53.3189	50.7547	58.8577
Lman2	58.3407	0.807919	0.247298	0.977189	0.913235	0.999791	63.6697	70.754	77.4379	64.335	81.4601	43.2782	46.0892	37.7709	40.271
Lsp1	363.204	0.52795	0.154382	2.67303	0.613942	0.999791	412.674	329.089	418.38	444.497	501.432	294.491	286.024	260.855	321.394
Lst1	50.179	1.48138	0.268104	1.06102	0.900406	0.999791	57.7743	62.5268	77.4379	79.9314	70.5987	24.8726	26.2076	23.6068	28.6544
Ly6a	108.042	0.126078	0.557714	5.75671	0.218069	0.999791	22.4023	54.2996	131.214	126.721	195.504	142.271	118.838	116.854	64.2788
Ly6d	89.0061	0.798791	0.214228	3.8106	0.432245	0.999791	97.2731	115.181	125.837	105.276	99.5623	78.5973	72.2968	59.0171	48.0155
Ly6e	411.433	0.102413	0.172275	4.1855	0.381482	0.999791	406.778	301.116	533.461	489.336	392.819	442.731	428.81	391.873	315.973
Lyz2	690.441	-0.810244	0.157343	4.3227	0.364091	0.999791	659.099	557.805	531.31	485.437	432.644	744.187	1001.76	757.779	1043.95
M6pr	48.3565	-1.10035	0.288794	0.986148	0.911889	0.999791	40.0883	23.0362	32.2658	40.9405	30.7738	67.6533	68.2301	60.1974	72.0232
Macroh2a1	267.481	0.957332	0.152422	1.01648	0.907287	0.999791	297.125	360.352	359.226	341.171	331.271	180.575	173.512	178.232	185.866
Man2b1	79.7442	-0.394883	0.232141	2.02417	0.731313	0.999791	77.8185	54.2996	78.5134	54.5873	90.5112	91.531	89.0154	86.1649	95.2565
Map2k2	58.0591	1.64767	0.25385	4.50535	0.341913	0.999791	51.879	100.372	87.1176	89.6792	79.6499	26.3649	31.6298	29.5085	26.3311
Map4k1	43.7917	0.951577	0.284291	0.590827	0.964078	0.999791	45.9836	60.8814	62.3805	58.4864	47.0658	27.3598	28.015	28.3282	35.6244
Mapk14	55.2949	0.711493	0.255506	0.357492	0.985807	0.999791	60.1325	70.754	66.6826	60.436	72.409	37.3088	39.3114	49.5743	41.0455
Mapkapk2	50.2912	0.900738	0.285608	1.82443	0.768009	0.999791	52.4685	62.5268	62.3805	72.1332	63.3579	44.7706	42.0225	18.8855	34.0755
Marcks	75.2184	0.519948	0.22575	3.07056	0.546087	0.999791	70.7441	74.0449	77.4379	105.276	101.373	63.6737	52.4152	70.8205	61.181
Mbnl1	85.9049	-0.691616	0.22333	7.38296	0.116982	0.999791	109.064	62.5268	50.5497	72.1332	70.5987	97.003	98.0525	113.313	99.9031
Mcl1	128.235	0.676809	0.185118	4.83153	0.305024	0.999791	107.295	159.608	153.8	154.014	175.592	106.455	88.5636	102.69	106.099
Mcm6	44.8613	1.27679	0.29324	1.07414	0.898353	0.999791	52.4685	55.945	74.2113	70.1837	47.0658	23.8777	19.8816	30.6889	29.4288
Mcrip1	43.1452	2.19706	0.298635	3.32076	0.50565	0.999791	47.1627	67.4631	75.2868	77.9819	57.9272	15.421	12.6519	21.2461	13.1655
Mdh2	52.3114	0.537868	0.289081	1.46479	0.83286	0.999791	67.7964	42.7815	87.1176	42.89	66.9783	45.268	35.2447	40.1316	42.5944
Mgat1	41.3163	1.30488	0.294111	2.77802	0.595633	0.999791	53.6476	52.6542	58.0784	37.0414	79.6499	22.8827	23.0446	20.0658	24.7822
Micos10	53.5755	0.586423	0.25404	1.11075	0.892563	0.999791	54.8267	57.5905	60.2295	76.0323	63.3579	38.8012	41.5707	44.853	44.9177
Mif	44.6371	0.0269107	0.319986	0.233136	0.993712	0.999791	41.8569	60.8814	54.8518	33.1423	30.7738	31.8369	40.2151	57.8367	50.3388
Mmp12	50.6775	-1.53028	0.285943	3.4409	0.486921	0.999791	21.2232	23.0362	24.7371	33.1423	30.7738	68.6482	70.9412	76.7222	106.873
Morf4l1	92.6716	0.50803	0.227671	0.614193	0.961473	0.999791	100.81	85.563	105.402	146.216	97.7521	79.0947	79.9783	62.5581	76.6699
Mpeg1	275.571	-0.854656	0.157275	1.6894	0.792642	0.999791	231.687	199.099	181.764	189.106	233.519	373.586	359.225	345.84	366.312
Mrfap1	58.8964	-0.203908	0.276306	1.79602	0.773211	0.999791	66.6173	80.6267	40.87	56.5369	39.8249	52.7298	57.8374	66.0991	68.9254
Mrpl30	51.5433	1.16088	0.269241	3.55932	0.468916	0.999791	45.9836	72.3995	63.4561	74.0828	77.8396	36.8114	30.7261	40.1316	22.4588
Mrpl52	74.8048	0.970296	0.236493	1.02573	0.90587	0.999791	79.5871	113.536	106.477	87.7296	83.2703	50.2426	41.5707	54.2957	56.5343
Msn	71.7222	-0.489847	0.235636	1.3851	0.846781	0.999791	66.0278	59.2359	63.4561	68.2341	48.8761	76.11	77.2672	100.329	85.9632
Msrb1	44.592	0.888565	0.280175	5.32338	0.255697	0.999791	42.4464	51.0087	79.5889	56.5369	45.2556	31.3394	35.6965	37.7709	21.6844
mt-Atp6	542.708	-3.5525	0.198661	2.75962	0.598823	0.999791	117.907	121.763	93.5708	60.436	95.9419	961.075	928.11	1214.57	1291
mt-Co3	891.234	-1.35426	0.133911	4.59655	0.331253	0.999791	673.837	508.442	551.745	501.034	497.812	1171.5	1300.89	1319.62	1496.22
mt-Cytb	246.342	-3.07858	0.236506	1.66836	0.796457	0.999791	58.9534	85.563	51.6253	54.5873	36.2045	394.976	407.573	587.81	539.787
mt-Nd1	235.605	-3.38653	0.223179	1.17484	0.882223	0.999791	45.9836	59.2359	40.87	35.0918	43.4454	406.418	409.832	538.236	541.336
mt-Nd2	76.453	-3.03808	0.337926	4.48949	0.343796	0.999791	8.25348	29.618	19.3595	11.6973	10.8613	126.85	119.29	201.838	160.31
mt-Nd3	119.208	-1.63682	0.218989	6.47848	0.166152	0.999791	95.5045	72.3995	67.7582	56.5369	41.6352	165.154	219.602	169.969	184.317
mt-Rnr1	541.478	-1.0023	0.150791	2.57443	0.631359	0.999791	340.161	360.352	397.945	399.657	340.322	621.814	689.079	835.682	888.286
Mtpn	57.152	0.206437	0.250833	0.428635	0.980066	0.999791	58.3639	62.5268	54.8518	56.5369	70.5987	47.2579	53.7707	55.476	54.9855
Mvb12a	57.4234	1.44911	0.28442	2.46751	0.650463	0.999791	58.3639	52.6542	87.1176	93.5783	104.993	35.8165	34.7928	20.0658	29.4288
Myh9	57.9592	-0.855731	0.270305	1.41199	0.842108	0.999791	45.9836	60.8814	45.1721	31.1928	32.584	77.1049	74.1042	80.2632	74.3465
Myl12a	43.854	-1.79842	0.316003	1.61416	0.806246	0.999791	28.2976	21.3908	15.0574	27.2937	19.9125	72.6279	69.5857	70.8205	69.6999
Myl12b	60.3108	-0.927492	0.277681	3.24613	0.517513	0.999791	60.722	65.8177	41.9455	33.1423	27.1534	76.11	76.3635	77.9025	83.6398
Myl6	350.994	1.15226	0.14625	6.13582	0.189232	0.999791	333.087	442.624	509.799	526.378	470.658	224.848	206.498	228.986	216.07
Naca	219.902	0.15164	0.160582	2.01906	0.732254	0.999791	218.717	233.653	211.879	230.047	248.001	192.016	183.453	231.347	230.01
Naga	77.3487	0.206147	0.237764	4.79127	0.309393	0.999791	67.7964	51.0087	80.6645	105.276	103.183	69.1457	62.356	66.0991	90.6098
Nap1l1	113.804	-0.161793	0.209132	2.56081	0.63378	0.999791	118.496	129.99	72.0603	118.922	112.234	118.393	113.416	114.493	126.234
Napsa	144.216	0.727706	0.18408	0.858217	0.930477	0.999791	182.166	192.517	184.991	177.409	141.197	109.937	102.119	101.509	106.099
Ncf1	93.0731	1.02277	0.213583	0.781531	0.940907	0.999791	102.579	133.281	114.006	126.721	119.475	56.212	69.1338	54.2957	61.9554
Ncl	68.8198	-0.38067	0.25265	1.24044	0.871397	0.999791	63.0801	75.6904	70.9847	42.89	50.6863	77.6024	75.4598	95.6077	67.3765
Ndufa10	42.0249	1.78572	0.294066	2.29641	0.681422	0.999791	45.3941	72.3995	60.2295	64.335	61.5476	21.3904	21.689	16.5248	14.7144
Ndufa11	45.2624	1.69279	0.279416	6.02055	0.197619	0.999791	42.4464	55.945	69.9092	93.5783	59.7374	18.9031	20.3335	27.1479	19.3611
Ndufa13	73.0613	0.815106	0.228963	1.45368	0.834813	0.999791	84.3034	103.663	97.8729	81.881	81.4601	51.2375	58.2893	55.476	43.3688
Ndufa3	86.8155	1.13127	0.215165	5.50789	0.239037	0.999791	98.4522	82.2721	127.988	120.872	139.387	43.2782	58.7411	48.394	61.9554
Ndufa4	69.934	0.102069	0.233038	1.70559	0.789703	0.999791	70.7441	59.2359	70.9847	91.6287	68.7885	67.6533	65.9708	75.5418	58.8577
Ndufa6	42.076	-2.34898	0.378129	5.47784	0.241685	0.999791	30.0662	26.3271	10.7553	13.6468	7.2409	65.6635	63.2597	64.9188	96.8054
Ndufb1	67.3285	-0.235599	0.24895	0.5146	0.972064	0.999791	67.2069	82.2721	54.8518	56.5369	54.3067	65.1661	74.1042	80.2632	71.2488
Ndufb11	44.7616	-0.402809	0.295584	1.68929	0.792662	0.999791	49.5209	46.0724	35.4924	42.89	27.1534	37.8063	51.0596	60.1974	52.6621
Ndufb7	55.4819	1.51176	0.269898	3.8105	0.432259	0.999791	53.0581	103.663	77.4379	54.5873	94.1317	28.3547	24.852	33.0496	30.2033
Ndufs6	53.0005	1.56981	0.268349	3.33737	0.503034	0.999791	48.9313	82.2721	86.0421	83.8305	66.9783	21.8878	26.2076	28.3282	32.5266
Ndufs8	45.9993	0.839595	0.290571	1.13845	0.888124	0.999791	45.3941	47.7178	62.3805	66.2846	59.7374	42.7808	28.9187	23.6068	37.1733
Ndufv3	42.7399	1.10947	0.290822	3.3807	0.496248	0.999791	38.9092	52.6542	62.3805	62.3855	56.117	22.3853	20.7853	31.8692	37.1733
Nedd8	46.5161	0.0844402	0.279535	1.0479	0.902447	0.999791	43.6255	60.8814	36.5679	42.89	54.3067	43.2782	46.9929	41.3119	48.7899
Nhp2	60.3985	2.03204	0.255677	3.52997	0.473336	0.999791	66.0278	111.89	103.251	74.0828	94.1317	25.37	23.9483	22.4265	22.4588
Nme1	41.9472	0.896991	0.296684	0.891359	0.925797	0.999791	43.6255	67.4631	57.0029	56.5369	36.2045	26.3649	27.1113	30.6889	32.5266
Nme2	128.743	1.06421	0.208125	3.63568	0.457551	0.999791	119.675	218.844	193.595	132.569	157.49	72.6279	85.8524	92.0666	85.9632
Nono	62.3839	0.270305	0.249286	3.41498	0.490922	0.999791	52.4685	51.0087	69.9092	74.0828	83.2703	49.7451	60.5486	73.1812	47.241
Nop53	110.964	0.977563	0.197509	3.16512	0.530583	0.999791	110.243	174.417	146.272	126.721	141.197	78.0998	69.5857	70.8205	81.3165
Npc2	214.607	0.359736	0.176435	5.24058	0.263491	0.999791	182.166	179.353	225.861	280.735	305.928	182.067	193.846	201.838	179.671
Npm1	148.845	-0.634057	0.201653	2.09521	0.718253	0.999791	145.025	149.735	130.139	83.8305	104.993	174.108	180.742	200.658	170.377
Nptn	48.4137	0.282462	0.288831	3.88927	0.421198	0.999791	42.4464	31.2634	40.87	70.1837	79.6499	42.7808	41.1188	42.4923	44.9177
Nsa2	85.1164	0.273099	0.215738	0.836464	0.933494	0.999791	96.094	98.7266	90.3442	83.8305	94.1317	80.5871	84.9487	68.4598	68.9254
Nup210	41.3753	0.590067	0.297105	2.0751	0.721949	0.999791	66.0278	47.7178	57.0029	33.1423	45.2556	34.8216	27.1113	31.8692	29.4288
Oaz1	158.982	-0.0215615	0.178917	1.59462	0.809758	0.999791	178.629	139.863	138.743	181.308	164.73	147.743	159.505	152.264	168.054
P4hb	50.9441	-0.85327	0.275541	2.45564	0.652596	0.999791	52.4685	39.4906	40.87	29.2432	34.3943	56.212	72.7487	64.9188	68.151
Pa2g4	51.0536	0.840995	0.272972	3.22193	0.521396	0.999791	58.9534	72.3995	87.1176	58.4864	39.8249	40.2935	35.2447	35.4102	31.7522
Pabpc1	317.456	0.595365	0.148489	4.28515	0.368788	0.999791	290.64	360.352	357.075	407.455	421.782	237.782	264.787	238.429	278.799
Pak1	61.7069	1.22092	0.260776	0.85831	0.930464	0.999791	79.5871	74.0449	61.305	107.225	94.1317	39.2986	36.1484	31.8692	31.7522
Park7	63.2977	1.23287	0.242854	3.03098	0.552655	0.999791	61.3115	88.8539	104.326	72.1332	90.5112	35.319	38.4077	37.7709	41.0455
Pcbp1	90.7424	0.200207	0.22095	2.06366	0.72405	0.999791	78.9975	72.3995	91.4197	111.124	123.095	90.0386	82.2376	79.0829	88.2865
Pcbp2	112.656	-1.09237	0.209593	3.40119	0.493062	0.999791	74.2813	69.1086	54.8518	101.376	79.6499	156.2	140.527	162.887	175.024
Pcna	61.4707	0.00991841	0.251391	0.792025	0.939514	0.999791	61.9011	62.5268	61.305	72.1332	50.6863	48.7502	69.1338	60.1974	66.6021
Pdia3	97.509	-0.667762	0.212173	1.39933	0.844312	0.999791	60.722	80.6267	72.0603	74.0828	88.701	122.373	124.712	140.461	113.843
Pdia6	43.5255	0.162804	0.283342	0.564711	0.966903	0.999791	41.2674	51.0087	38.7189	54.5873	41.6352	35.319	42.9262	43.6726	42.5944
Pebp1	50.2317	0.4299	0.280881	1.42719	0.839455	0.999791	46.5732	67.4631	70.9847	60.436	34.3943	39.7961	41.1188	44.853	46.4666
Pfdn5	156.469	1.17243	0.180466	4.57627	0.333599	0.999791	151.51	228.717	219.407	198.854	220.847	87.5514	90.371	93.247	117.715
Pfn1	431.025	0.0340406	0.175773	4.49916	0.342647	0.999791	416.8	264.916	533.461	532.226	447.125	417.361	405.766	440.267	421.297
Pgam1	67.674	-0.20183	0.249884	1.69805	0.791072	0.999791	66.6173	52.6542	84.9666	68.2341	47.0658	75.6126	68.2301	79.0829	66.6021
Pgk1	65.3114	0.0325489	0.258632	2.61499	0.624171	0.999791	53.6476	69.1086	69.9092	93.5783	39.8249	56.212	61.9041	70.8205	72.7976
Pgls	137.35	1.57429	0.189091	5.76695	0.217241	0.999791	133.824	246.816	205.426	189.106	182.833	72.1304	62.356	73.1812	70.4743
Pik3cd	62.4477	1.62225	0.245386	2.42032	0.658957	0.999791	66.6173	88.8539	84.9666	93.5783	106.803	26.8624	30.7261	31.8692	31.7522
Pip4k2a	43.8375	0.149844	0.282198	1.1079	0.893016	0.999791	58.3639	49.3633	43.0211	40.9405	43.4454	35.8165	44.7336	40.1316	38.7221
Pirb	42.8672	0.534422	0.280048	0.314496	0.988859	0.999791	51.879	54.2996	52.7008	44.8396	45.2556	36.3139	32.9854	34.2299	33.301
Pitpna	74.2185	-0.122851	0.235635	2.12464	0.712846	0.999791	86.6615	77.3358	57.0029	56.5369	88.701	73.1253	70.4894	81.4436	76.6699
Pkig	50.7348	2.11142	0.282456	3.53831	0.472078	0.999791	50.1104	74.0449	69.9092	91.6287	95.9419	16.4159	23.0446	17.7051	17.8122
Pkm	136.742	0.435318	0.190577	6.69863	0.152697	0.999791	96.094	134.926	161.329	175.459	181.022	133.317	105.734	122.756	120.039
Plac8	246.774	0.530415	0.169608	2.70567	0.608223	0.999791	331.318	238.589	333.413	306.079	240.76	217.884	189.779	191.215	171.926
Plbd1	85.915	-1.63489	0.238564	4.96251	0.291165	0.999791	53.0581	54.2996	30.1147	52.6378	39.8249	132.322	106.186	149.903	154.889
Plekho1	82.5102	0.226449	0.220683	6.63998	0.156181	0.999791	68.9755	83.9176	80.6645	74.0828	123.095	66.161	62.356	84.9846	98.3543
Plxnb2	45.8212	1.23068	0.280798	2.57579	0.631118	0.999791	55.4162	60.8814	52.7008	77.9819	57.9272	21.8878	21.2372	29.5085	34.8499
Polr1d	47.6673	-0.122621	0.297806	2.07065	0.722766	0.999791	51.2895	27.9725	38.7189	48.7387	68.7885	58.2018	45.6374	37.7709	51.8877
Pomp	138.166	0.95533	0.197166	4.32163	0.364224	0.999791	127.929	204.035	196.821	132.569	200.935	87.0539	85.4006	100.329	108.422
Ppdpf	48.0614	1.21831	0.275634	0.59533	0.963581	0.999791	54.8267	72.3995	66.6826	58.4864	65.1681	23.8777	29.3706	35.4102	26.3311
Ppia	353.151	-0.430157	0.150476	2.35312	0.671116	0.999791	378.481	292.889	320.507	302.18	275.154	413.879	368.262	409.578	417.425
Ppib	120.492	0.427142	0.216029	1.07647	0.897987	0.999791	115.549	102.017	165.631	124.771	164.73	118.891	94.8895	102.69	95.2565
Ppp1ca	148.311	0.942497	0.189736	0.958933	0.915958	0.999791	170.965	154.672	217.256	204.702	190.074	102.972	94.8895	88.5256	110.745
Ppp1r18	44.853	-0.320261	0.280936	0.834449	0.933771	0.999791	43.6255	32.9089	41.9455	35.0918	50.6863	48.2528	49.704	49.5743	51.8877
Ppp2ca	42.7098	0.143746	0.286086	2.10657	0.716166	0.999791	42.4464	34.5543	59.1539	42.89	43.4454	39.7961	46.0892	31.8692	44.1432
Ppp6r1	62.54	0.862254	0.240825	0.627899	0.959914	0.999791	74.2813	74.0449	81.74	74.0828	85.0805	44.7706	41.1188	38.9513	48.7899
Ppt1	44.8923	-1.01097	0.292463	2.71873	0.605941	0.999791	38.9092	21.3908	29.0392	37.0414	34.3943	54.2222	56.4819	56.6564	75.8954
Prdx1	224.372	-0.674084	0.166054	4.3901	0.355779	0.999791	133.235	185.935	193.595	204.702	144.818	309.415	294.158	278.561	274.927
Prdx2	50.099	0.41465	0.262745	0.823323	0.935294	0.999791	53.0581	55.945	50.5497	54.5873	66.9783	39.2986	44.2818	38.9513	47.241
Prdx6	50.4072	0.140361	0.276975	3.31495	0.506567	0.999791	51.879	74.0449	37.6434	52.6378	48.8761	58.6992	51.5115	34.2299	44.1432
Prelid1	85.6841	0.690026	0.221505	0.516501	0.971875	0.999791	97.2731	97.0811	114.006	93.5783	108.613	60.689	54.6745	75.5418	69.6999
Prkar1a	45.4787	-0.199606	0.298224	0.0411256	0.999791	0.999791	43.036	39.4906	44.0966	56.5369	30.7738	51.2375	45.1855	37.7709	61.181
Prr13	42.2697	-0.226298	0.287812	2.42174	0.658702	0.999791	48.9313	27.9725	37.6434	38.9909	48.8761	41.7859	40.6669	43.6726	51.8877
Psap	1225.22	0.519863	0.12262	4.97287	0.290093	0.999791	1146.05	1530.26	1415.39	1351.04	1522.4	1014.8	1079.03	889.977	1078.02
Psma2	52.234	0.105843	0.258585	1.38302	0.847141	0.999791	48.3418	59.2359	47.3232	64.335	48.8761	56.212	49.704	51.935	44.1432
Psma6	63.5241	0.864788	0.259786	0.97429	0.913669	0.999791	76.6394	102.017	87.1176	62.3855	66.9783	37.3088	43.3781	40.1316	55.7599
Psma7	62.0679	0.737983	0.26355	0.852855	0.931225	0.999791	69.565	60.8814	84.9666	74.0828	85.0805	62.6788	45.6374	37.7709	37.9477
Psmb1	86.5862	0.207617	0.212432	2.70304	0.608682	0.999791	73.1022	103.663	100.024	93.5783	81.4601	81.582	93.9858	79.0829	72.7976
Psmb10	90.0178	1.95897	0.219566	7.07537	0.131959	0.999791	80.7661	148.09	155.951	155.964	119.475	36.3139	34.341	41.3119	37.9477
Psmb2	45.4063	0.675082	0.277427	0.740254	0.946274	0.999791	48.9313	42.7815	59.1539	62.3855	57.9272	34.3241	35.6965	29.5085	37.9477
Psmb3	80.0935	1.44308	0.229786	3.74683	0.441351	0.999791	75.4603	100.372	141.969	118.922	110.424	47.2579	39.7632	44.853	41.8199
Psmb4	109.81	1.28893	0.198122	4.4741	0.34563	0.999791	109.064	153.026	176.386	159.863	133.957	67.6533	63.7116	69.6401	54.9855
Psmb5	42.4393	0.103922	0.301681	2.71627	0.60637	0.999791	44.215	64.1723	44.0966	33.1423	32.584	45.7655	30.2743	36.5906	51.1132
Psmb6	79.8704	1.48774	0.227384	6.43121	0.169177	0.999791	65.4383	121.763	133.365	103.326	121.285	39.2986	42.9262	51.935	39.4966
Psmb8	201.525	0.525341	0.174308	1.147	0.886745	0.999791	205.747	197.453	251.673	239.794	260.672	183.559	154.986	146.362	173.475
Psmb9	52.8448	-1.54747	0.288445	3.16226	0.531047	0.999791	45.3941	32.9089	24.7371	21.445	30.7738	76.11	84.4969	86.1649	73.5721
Psmd8	67.3878	0.961	0.235495	2.1373	0.710523	0.999791	63.0801	97.0811	92.4953	93.5783	76.0294	44.7706	46.9929	43.6726	48.7899
Psme1	130.709	0.257258	0.194228	1.06007	0.900555	0.999791	120.265	134.926	140.894	136.468	162.92	139.286	123.356	114.493	103.775
Psme2	90.3104	0.27373	0.210167	2.48619	0.64711	0.999791	77.8185	103.663	110.779	85.7801	101.373	95.5106	81.7857	75.5418	80.5421
Pstpip1	47.5413	1.73387	0.27826	2.93292	0.569113	0.999791	45.9836	70.754	69.9092	76.0323	77.8396	24.8726	23.4965	16.5248	22.4588
Ptbp3	47.381	0.187481	0.27014	1.14587	0.886928	0.999791	45.9836	46.0724	52.7008	62.3855	41.6352	45.268	40.2151	49.5743	42.5944
Ptges3	60.0093	0.596257	0.243339	2.30913	0.679107	0.999791	51.2895	77.3358	73.1358	64.335	79.6499	49.7451	52.867	46.0333	45.6921
Ptms	67.4767	-1.32926	0.261908	0.323896	0.98822	0.999791	35.9616	27.9725	48.3987	42.89	43.4454	114.911	96.2451	96.788	100.678
Ptp4a2	81.2298	0.651451	0.23576	1.3245	0.857206	0.999791	87.251	98.7266	84.9666	124.771	86.8908	78.0998	59.6449	47.2137	63.5043
Ptpn18	130.533	1.03546	0.187625	7.26528	0.122516	0.999791	124.981	189.226	152.725	154.014	209.986	82.0794	84.4969	69.6401	107.648
Ptpn6	77.8556	-0.269058	0.231936	3.62991	0.458402	0.999791	90.7882	74.0449	86.0421	50.6882	65.1681	98.4953	83.5932	79.0829	72.7976
Pycard	68.1681	0.745319	0.244439	2.19722	0.699538	0.999791	84.8929	103.663	66.6826	89.6792	70.5987	42.2833	44.7336	63.7384	47.241
Rab7	75.2398	-0.171651	0.229191	2.35388	0.670978	0.999791	62.4906	51.0087	73.1358	83.8305	83.2703	74.6177	79.0746	81.4436	88.2865
Rabac1	53.5014	0.779092	0.257898	3.63996	0.456918	0.999791	43.6255	64.1723	63.4561	70.1837	77.8396	35.8165	38.8595	51.935	35.6244
Rac1	74.8899	-0.0969813	0.229599	1.01134	0.908072	0.999791	75.4603	82.2721	61.305	81.881	65.1681	83.5718	71.8449	69.6401	82.8654
Rac2	181.92	1.16973	0.17062	2.66183	0.61591	0.999791	210.464	200.744	246.296	286.583	257.052	102.972	110.253	114.493	108.422
Rack1	685.922	0.412652	0.155896	2.30113	0.680563	0.999791	714.515	1036.63	718.452	662.846	715.039	543.217	562.108	585.449	635.043
Ramp1	50.1209	1.13965	0.265602	1.5753	0.813224	0.999791	58.9534	77.3358	70.9847	66.2846	54.3067	34.3241	27.5632	34.2299	27.1055
Ran	103.846	0.434166	0.205337	2.96574	0.563575	0.999791	106.706	121.763	126.912	140.367	86.8908	95.0132	77.2672	99.1487	80.5421
Ranbp1	49.7756	0.375098	0.263572	2.72983	0.604004	0.999791	41.8569	55.945	64.5316	66.2846	43.4454	47.2579	47.4448	42.4923	38.7221
Rap1b	56.7255	-0.354461	0.264189	0.391365	0.983178	0.999791	55.4162	60.8814	38.7189	52.6378	48.8761	56.212	67.7782	67.2795	62.7299
Rbbp4	53.0133	0.432647	0.261438	1.09736	0.894691	0.999791	51.2895	62.5268	72.0603	50.6882	57.9272	39.7961	47.8966	53.1154	41.8199
Rbm39	47.954	0.274993	0.267996	1.98385	0.73873	0.999791	51.2895	67.4631	52.7008	44.8396	43.4454	49.7451	42.4744	40.1316	39.4966
Rbpj	42.3088	-0.510287	0.304717	1.27923	0.86489	0.999791	43.6255	31.2634	24.7371	37.0414	48.8761	54.7196	51.9633	41.3119	47.241
Rbx1	44.194	-0.311225	0.280592	0.289398	0.990488	0.999791	41.2674	41.1361	39.7945	38.9909	38.0147	48.2528	42.9262	55.476	51.8877
Reep5	100.803	0.891505	0.200207	3.51385	0.475775	0.999791	93.1464	144.799	119.383	128.67	135.767	72.6279	64.1634	72.0008	76.6699
Rgs10	67.4	-0.683962	0.263865	0.809249	0.937204	0.999791	47.1627	46.0724	39.7945	54.5873	77.8396	90.0386	88.5636	92.0666	70.4743
Rgs2	54.0199	0.602934	0.265942	0.851455	0.93142	0.999791	73.6917	70.754	55.9274	48.7387	72.409	37.3088	37.504	49.5743	40.271
Rhoa	74.7322	-1.23726	0.241017	2.78451	0.59451	0.999791	63.0801	37.8452	49.4742	54.5873	39.8249	101.48	102.571	116.854	106.873
Rhog	88.7767	0.75168	0.225127	3.83423	0.428905	0.999791	87.8406	69.1086	122.61	118.922	139.387	61.6839	65.519	69.6401	64.2788
Rnase6	67.6924	-0.0460901	0.240361	2.00919	0.734069	0.999791	84.8929	54.2996	65.6071	81.881	57.9272	62.1814	68.2301	63.7384	70.4743
Rnf130	41.2249	-0.490201	0.296865	2.24735	0.69037	0.999791	49.5209	27.9725	39.7945	38.9909	27.1534	44.2731	46.5411	47.2137	49.5644
Rnf187	56.9172	0.783972	0.261874	0.889391	0.926078	0.999791	77.2289	83.9176	64.5316	48.7387	77.8396	40.791	37.9558	44.853	36.3988
Rnh1	46.1348	-0.557038	0.286179	0.181187	0.996136	0.999791	41.2674	46.0724	35.4924	37.0414	32.584	48.2528	58.2893	51.935	64.2788
Rogdi	46.6797	0.927273	0.284387	2.24667	0.690495	0.999791	58.9534	69.1086	69.9092	58.4864	38.0147	27.8573	29.3706	41.3119	27.1055
Rpl10	380.483	-0.907602	0.152858	4.72334	0.31688	0.999791	364.332	296.18	249.522	255.391	260.672	448.203	484.389	491.022	574.637
Rpl10-ps3	373.922	-0.298001	0.160163	2.06169	0.724413	0.999791	400.294	350.479	346.319	313.877	309.548	359.16	355.158	487.481	442.981
Rpl10a	501.896	0.443599	0.145309	2.41131	0.660584	0.999791	475.164	677.922	546.367	524.428	581.082	394.479	414.351	433.185	470.087
Rpl11	697.913	0.737608	0.129404	3.07441	0.545452	0.999791	686.217	904.993	864.723	824.658	901.492	500.436	512.855	542.957	542.885
Rpl12	576.275	0.718029	0.144666	4.18268	0.381847	0.999791	536.476	860.566	699.092	653.098	680.644	415.372	414.351	456.792	470.087
Rpl13	1272.65	0.927792	0.149352	2.98504	0.560332	0.999791	1286.36	2048.58	1689.65	1499.2	1439.13	785.475	848.132	892.338	964.956
Rpl14	820.421	1.1094	0.137357	6.91939	0.14021	0.999791	767.573	1273.57	1104.57	1017.66	1122.34	492.477	480.774	559.482	565.343
Rpl15	373.718	-0.383935	0.149041	3.6179	0.46018	0.999791	380.839	256.689	366.754	333.373	340.322	389.007	415.707	430.825	449.951
Rpl17	995.91	0.346583	0.141953	0.76112	0.943583	0.999791	983.932	1253.83	1150.81	1060.55	997.434	801.394	808.369	941.912	964.956
Rpl18	665.848	0.490637	0.13368	1.1974	0.878527	0.999791	676.785	770.067	809.871	754.475	765.725	520.334	511.5	596.072	587.802
Rpl19	885.807	0.596745	0.13461	2.4775	0.64867	0.999791	858.361	1192.95	1106.72	982.572	999.244	685.985	660.612	737.713	748.112
Rpl21	951.847	1.0085	0.137934	3.19015	0.526524	0.999791	985.111	1449.63	1234.7	1198.97	1178.46	585.5	577.471	682.237	674.54
Rpl22	363.466	0.236039	0.164992	2.10313	0.716798	0.999791	357.847	501.86	343.093	348.969	383.768	299.466	301.839	354.102	380.251
Rpl22l1	70.0267	0.108371	0.244633	0.726976	0.947961	0.999791	70.1545	97.0811	62.3805	68.2341	63.3579	60.689	62.8078	69.6401	75.8954
Rpl23	864.839	-0.0519338	0.135311	0.92128	0.921488	0.999791	856.593	951.066	787.285	775.92	887.01	801.394	850.391	913.584	960.309
Rpl23a	579.687	-0.6363	0.171087	4.53963	0.337874	0.999791	563.005	645.013	372.132	442.547	381.957	658.128	637.567	690.5	826.331
Rpl26	656.156	0.23778	0.169243	2.3039	0.680059	0.999791	600.146	970.811	692.639	588.763	633.579	540.232	558.493	656.27	664.472
Rpl27	456.986	0.335536	0.147078	2.45448	0.652805	0.999791	464.553	623.623	428.059	501.034	488.761	390.499	376.395	420.202	419.748
Rpl27a	812.08	0.0126827	0.138381	1.50983	0.824899	0.999791	831.243	908.284	730.282	811.012	798.309	714.34	739.235	894.699	881.316
Rpl29	525.436	0.597267	0.140323	1.3889	0.846121	0.999791	533.528	640.077	663.6	619.956	597.374	391.991	383.625	442.628	456.147
Rpl3	606.787	0.75834	0.137174	2.75942	0.598857	0.999791	601.914	799.685	826.004	684.291	742.192	431.788	434.684	462.694	477.831
Rpl30	769.073	0.529193	0.140258	1.26311	0.867603	0.999791	777.595	1002.07	929.255	844.154	848.995	582.018	583.345	643.286	710.939
Rpl31	1064.58	0.816906	0.124792	1.56405	0.815239	0.999791	1187.91	1471.03	1239.01	1319.84	1325.08	744.684	721.612	801.452	770.571
Rpl32	979.326	0.303013	0.13953	2.07848	0.721327	0.999791	957.993	1245.6	1014.22	994.269	1078.89	800.896	783.517	937.191	1001.35
Rpl34	554.821	-0.14867	0.148949	0.845597	0.932233	0.999791	532.939	613.75	540.99	421.102	543.067	561.622	558.945	616.138	604.84
Rpl35	573.448	0.508166	0.15825	3.21915	0.521844	0.999791	565.363	857.276	684.035	530.277	633.579	456.163	421.129	480.399	532.817
Rpl35a	904.918	0.617145	0.133141	3.78297	0.436174	0.999791	901.397	1248.89	983.031	1064.45	1086.13	678.523	640.73	731.812	809.293
Rpl36a	377.093	0.674642	0.154626	2.53777	0.637886	0.999791	360.795	547.932	462.476	436.699	418.162	266.634	293.254	290.364	317.522
Rpl36al	212.412	0.967926	0.178799	3.78569	0.435786	0.999791	205.747	335.67	269.957	212.501	311.359	139.784	133.297	159.346	144.046
Rpl37	785.127	0.459205	0.140755	2.34706	0.672215	0.999791	820.042	921.448	935.708	768.121	982.952	597.439	581.537	699.942	758.954
Rpl37a	931.423	0.823931	0.133884	1.54098	0.819359	0.999791	987.469	1322.94	1154.04	1119.04	1129.58	607.885	676.427	682.237	703.194
Rpl39	717.101	-0.12722	0.140839	0.598737	0.963204	0.999791	672.069	768.422	613.05	736.929	648.06	674.046	754.598	776.665	810.067
Rpl4	416.501	-0.730287	0.178159	3.44568	0.486186	0.999791	380.839	455.788	320.507	237.845	269.723	488	516.018	527.613	552.178
Rpl6	699.945	0.692199	0.139973	0.827856	0.934675	0.999791	748.119	951.066	883.007	809.062	783.827	488.497	508.337	563.023	564.569
Rpl7	556.864	0.230946	0.153043	2.18824	0.701183	0.999791	605.451	778.294	556.047	493.235	562.98	489.989	482.129	519.35	524.298
Rpl7a	278.374	-1.29508	0.17171	5.94791	0.203072	0.999791	241.709	204.035	163.48	157.913	130.336	385.027	370.521	444.989	407.357
Rpl8	864.164	1.29263	0.139904	5.41319	0.247466	0.999791	876.637	1424.95	1217.5	1195.07	1064.41	478.05	459.537	534.695	526.621
Rpl9	176.024	-0.423043	0.180247	1.131	0.889324	0.999791	168.607	156.317	167.782	134.519	143.008	168.636	207.853	216.002	221.491
Rpl9-ps6	403.579	0.200242	0.169033	1.90096	0.753968	0.999791	396.167	566.032	379.661	380.162	407.3	333.79	334.825	428.464	405.808
Rplp0	1273.07	0.703124	0.128927	1.68625	0.793213	0.999791	1322.91	1707.97	1532.62	1623.97	1415.6	927.249	927.206	960.798	1039.3
Rplp2	1000.18	0.768933	0.140182	4.1313	0.388529	0.999791	959.761	1457.86	1263.74	1126.84	1216.47	682.503	696.309	737.713	860.406
Rpn1	47.2498	0.4449	0.271258	1.86081	0.761341	0.999791	48.9313	52.6542	59.1539	42.89	61.5476	31.3394	45.6374	38.9513	44.1432
Rpn2	79.5541	1.22932	0.227137	4.27949	0.369501	0.999791	74.8708	116.826	89.2687	138.418	106.803	41.2884	49.704	53.1154	45.6921
Rps10	827.695	0.878772	0.137908	2.07601	0.721781	0.999791	875.458	1212.69	1085.21	959.177	1001.05	547.196	549.456	590.171	628.848
Rps11	1107.46	0.628645	0.124485	5.66094	0.225941	0.999791	1066.47	1306.48	1333.65	1288.65	1466.28	789.952	805.206	898.24	1012.2
Rps12	566.59	0.833248	0.149201	1.51493	0.823994	0.999791	624.316	847.403	733.509	621.905	664.352	370.104	390.403	396.595	450.726
Rps13	595.413	1.10238	0.139498	2.7472	0.60098	0.999791	636.697	842.467	799.116	818.81	756.674	328.318	366.454	398.955	411.229
Rps14	919.747	0.277152	0.157622	0.801137	0.938296	0.999791	988.059	1235.73	1060.47	937.732	776.586	740.207	804.754	845.124	889.061
Rps15a	817.708	0.269102	0.137997	1.76253	0.779331	0.999791	820.042	1030.05	816.324	811.012	915.974	689.965	675.071	793.189	807.744
Rps16	1054.61	0.521282	0.127555	1.65566	0.798755	0.999791	1124.24	1199.53	1229.33	1276.95	1216.47	800.399	784.42	875.813	984.317
Rps17	555.993	0.759779	0.153261	0.836933	0.933429	0.999791	604.272	789.812	698.017	688.19	588.323	354.185	394.018	440.267	446.854
Rps18	543.227	-0.810587	0.197277	2.37339	0.667442	0.999791	429.181	617.041	408.7	286.583	336.702	631.763	624.012	806.173	748.886
Rps19	1097.67	0.669145	0.165084	1.67116	0.79595	0.999791	1116.58	1706.32	1372.37	1177.53	1131.39	736.725	764.087	875.813	998.257
Rps2	501.794	-0.653715	0.154401	0.96721	0.914727	0.999791	448.046	399.843	465.703	347.019	365.665	567.094	577.471	666.893	678.412
Rps20	1138.86	0.63924	0.12538	2.46828	0.650325	0.999791	1180.25	1421.66	1302.46	1405.62	1386.63	807.363	829.606	941.912	974.249
Rps21	933.054	0.675016	0.144029	4.62736	0.327712	0.999791	874.868	1345.97	1076.6	1004.02	1196.56	643.204	658.805	769.583	827.88
Rps23	652.913	-0.59503	0.162708	3.19884	0.525118	0.999791	614.884	719.058	520.555	463.992	412.731	758.613	739.235	826.239	820.91
Rps25	916.564	0.654486	0.128305	2.73834	0.602523	0.999791	939.717	1090.93	1130.38	1124.89	1115.1	621.814	685.916	756.599	783.736
Rps26	675.308	0.364788	0.135308	1.07226	0.898648	0.999791	784.67	743.74	756.095	803.213	673.403	521.826	551.715	619.679	623.427
Rps27	390.921	1.40271	0.150837	7.29983	0.120867	0.999791	373.765	608.814	533.461	616.057	521.345	192.016	201.075	227.806	243.95
Rps27a	1212.6	0.932696	0.147608	1.85359	0.762665	0.999791	1323.5	1954.79	1510.04	1491.4	1350.43	741.7	799.331	864.01	878.218
Rps27l	76.8198	-0.0912793	0.226328	2.04231	0.727977	0.999791	61.9011	75.6904	84.9666	74.0828	68.7885	97.003	78.1709	82.6239	68.151
Rps27rt	720.203	0.202401	0.144172	0.6142	0.961473	0.999791	764.626	885.248	714.149	785.667	675.214	608.88	625.367	686.959	735.721
Rps28	506.391	-0.992836	0.158489	2.86396	0.580844	0.999791	445.688	424.524	350.622	302.18	300.497	625.296	664.679	690.5	753.533
Rps29	1462.42	0.62442	0.122552	1.79856	0.772746	0.999791	1514.51	1852.77	1686.43	1783.84	1737.82	1084.44	1095.75	1150.83	1255.37
Rps3	513.547	-0.746498	0.158995	0.911874	0.922851	0.999791	444.509	465.66	407.624	354.818	331.271	604.403	592.834	715.287	705.518
Rps3a1	811.466	0.558972	0.158943	3.37069	0.49781	0.999791	842.444	1313.06	863.648	768.121	928.645	617.834	604.582	703.483	661.374
Rps4x	1173.56	1.04953	0.132166	5.79482	0.215004	0.999791	1182.61	1800.11	1357.31	1584.98	1585.76	709.365	715.738	771.943	854.211
Rps5	741.04	0.234285	0.149833	1.25665	0.868687	0.999791	739.276	992.202	743.189	748.626	725.9	621.814	630.79	709.385	758.18
Rps6	961.454	0.565935	0.139907	1.38324	0.847102	0.999791	974.5	1327.87	1152.96	1052.76	1049.93	717.822	728.842	832.141	816.263
Rps6ka1	49.9822	0.244103	0.267012	0.27231	0.991531	0.999791	54.8267	49.3633	59.1539	50.6882	54.3067	51.7349	43.8299	47.2137	38.7221
Rps7	633.841	0.0709573	0.144677	1.41149	0.842195	0.999791	667.942	798.04	590.464	582.915	615.476	585.002	585.152	624.401	655.179
Rps8	1004.4	1.01478	0.152308	4.1699	0.3835	0.999791	1062.93	1767.21	1304.61	1150.23	1136.82	626.788	628.982	648.007	714.036
Rps9	1031.01	0.402916	0.13637	1.08453	0.896719	0.999791	1062.34	1352.55	1127.15	1144.38	1055.36	821.789	831.865	964.339	919.264
Rrbp1	63.2205	1.36908	0.241611	3.42864	0.488811	0.999791	61.9011	85.563	89.2687	97.4773	92.3214	28.3547	35.2447	40.1316	38.7221
Rsrp1	44.6391	-0.325879	0.279238	1.78095	0.775965	0.999791	40.0883	42.7815	39.7945	46.7891	30.7738	55.7145	43.8299	57.8367	44.1432
Rtcb	42.0332	0.525274	0.292788	4.97891	0.289468	0.999791	37.1406	34.5543	41.9455	48.7387	79.6499	32.8318	35.2447	27.1479	41.0455
Rtn4	75.3361	0.359065	0.241897	2.19702	0.699575	0.999791	73.6917	93.7902	63.4561	81.881	99.5623	48.7502	64.1634	83.8042	68.9254
Rtraf	69.365	0.547104	0.230364	1.51079	0.824728	0.999791	64.8487	85.563	70.9847	93.5783	83.2703	56.7094	54.2226	55.476	59.6321
S100a10	134.46	1.01467	0.183677	5.05049	0.282156	0.999791	151.51	174.417	149.498	202.753	179.212	82.5769	68.682	106.231	95.2565
S100a11	178.288	-1.3294	0.214975	6.39947	0.171236	0.999791	132.056	54.2996	98.9484	118.922	161.11	263.152	235.416	252.593	288.093
S100a4	232.831	1.83173	0.186141	6.74274	0.150124	0.999791	287.693	480.469	367.83	348.969	220.847	96.0081	97.6007	106.231	89.8354
S100a6	113.351	0.908274	0.207731	2.88744	0.576836	0.999791	108.474	148.09	140.894	157.913	148.438	87.0539	91.7266	55.476	82.091
Samhd1	73.6801	0.700892	0.268251	3.84682	0.427133	0.999791	56.5953	65.8177	75.2868	136.468	103.183	71.633	59.6449	49.5743	44.9177
Scand1	103.592	1.07728	0.204551	2.6464	0.618627	0.999791	106.706	169.481	136.592	120.872	132.146	69.1457	59.193	70.8205	67.3765
Sdcbp	47.5803	-1.53647	0.297641	2.20632	0.697873	0.999791	35.372	16.4544	26.8882	27.2937	30.7738	69.1457	70.4894	74.3615	77.4443
Sdf4	47.8024	0.858343	0.281869	1.4722	0.831555	0.999791	50.1104	74.0449	55.9274	72.1332	43.4454	36.3139	28.4669	29.5085	40.271
Sec61b	82.2846	0.146962	0.235191	0.412095	0.981475	0.999791	88.4301	83.9176	75.2868	107.225	77.8396	87.0539	75.4598	57.8367	87.5121
Sec61g	82.6618	0.652127	0.22268	2.79553	0.592604	0.999791	73.6917	105.308	82.8155	115.023	108.613	67.6533	64.1634	53.1154	73.5721
Selenoh	58.5867	0.982917	0.262505	1.22122	0.874593	0.999791	64.8487	98.7266	76.3624	74.0828	57.9272	31.8369	43.8299	42.4923	37.1733
Selenot	43.8604	-0.04116	0.289788	0.147683	0.997404	0.999791	45.3941	44.427	46.2476	48.7387	32.584	47.7553	41.1188	36.5906	51.8877
Selplg	69.4528	-0.971981	0.245845	2.44443	0.654614	0.999791	54.2371	67.4631	38.7189	44.8396	43.4454	101.977	85.8524	95.6077	92.9332
Sem1	105.918	0.868323	0.202303	4.69489	0.320059	0.999791	90.1987	146.444	162.404	122.821	124.905	81.0845	72.7487	79.0829	73.5721
Sema4d	61.9896	0.121245	0.249284	1.26298	0.867624	0.999791	60.722	47.7178	75.2868	79.9314	57.9272	57.2069	60.0967	57.8367	61.181
Septin9	53.7559	0.244982	0.269935	1.28539	0.863849	0.999791	57.1848	36.1997	57.0029	72.1332	68.7885	49.7451	47.4448	51.935	43.3688
Serbp1	101.994	0.671615	0.200901	3.1653	0.530553	0.999791	102.579	144.799	114.006	130.62	110.424	82.0794	70.4894	93.247	69.6999
Serf2	113.338	0.658449	0.207853	2.66788	0.614846	0.999791	120.854	95.4357	150.574	148.166	159.3	87.0539	86.7562	72.0008	99.9031
Serinc3	152.656	-0.280544	0.185737	4.0217	0.403077	0.999791	165.07	179.353	111.855	126.721	130.336	171.621	145.949	166.428	176.573
Serp1	102.498	-0.205771	0.206217	0.301844	0.989695	0.999791	96.6836	108.599	83.8911	101.376	90.5112	101.977	110.704	115.673	113.069
Set	81.3467	0.064875	0.228627	3.46501	0.483219	0.999791	87.8406	100.372	103.251	52.6378	74.2192	81.0845	84.045	72.0008	76.6699
Sf1	49.2845	0.665293	0.27891	0.567163	0.966642	0.999791	51.2895	42.7815	65.6071	70.1837	63.3579	44.2731	39.3114	34.2299	32.5266
Sf3b2	41.6288	0.509801	0.301478	1.2057	0.877159	0.999791	44.215	72.3995	41.9455	46.7891	34.3943	31.8369	32.0817	33.0496	37.9477
Sfpq	47.1453	0.282862	0.276191	0.261135	0.992183	0.999791	48.9313	55.945	41.9455	50.6882	57.9272	39.7961	44.2818	48.394	36.3988
Sh3bgrl	53.4775	0.469677	0.259773	1.70328	0.790122	0.999791	56.5953	60.8814	45.1721	76.0323	66.9783	48.7502	40.2151	44.853	41.8199
Sh3bgrl3	297.858	0.381926	0.151484	1.21285	0.875978	0.999791	294.767	314.28	346.319	327.524	360.235	245.741	260.268	289.184	242.401
Shisa5	53.4031	0.235422	0.279534	2.54666	0.6363	0.999791	47.1627	42.7815	50.5497	91.6287	54.3067	51.7349	56.9337	46.0333	39.4966
Siglech	58.5246	-0.0663493	0.26364	2.1275	0.712323	0.999791	50.1104	54.2996	50.5497	72.1332	56.117	81.0845	62.8078	55.476	44.1432
Sirpa	42.1612	-0.800285	0.294212	1.13186	0.889184	0.999791	36.5511	31.2634	29.0392	35.0918	28.9636	47.7553	47.8966	57.8367	65.0532
Slc25a3	93.2353	-0.0492658	0.20875	4.78228	0.310375	0.999791	66.6173	106.954	76.3624	87.7296	110.424	99.9877	92.1784	87.3453	111.52
Slc25a5	65.9204	-1.63076	0.268662	1.02366	0.906187	0.999791	40.0883	47.7178	26.8882	31.1928	30.7738	99.9877	106.186	109.772	100.678
Smdt1	61.7834	0.445225	0.25635	1.35638	0.85174	0.999791	75.4603	97.0811	62.3805	64.335	54.3067	49.7451	47.4448	47.2137	58.0832
Snhg20	66.7593	1.97918	0.259291	6.80356	0.146641	0.999791	67.2069	64.1723	96.7974	138.418	130.336	24.8726	24.852	22.4265	31.7522
Snora73b	166.251	1.24626	0.509552	2.12253	0.713234	0.999791	185.703	65.8177	325.884	311.928	253.431	90.0386	97.6007	81.4436	84.4143
Snrpd2	88.7853	1.50258	0.226405	3.51796	0.475153	0.999791	93.7359	144.799	145.196	136.468	95.9419	43.7757	53.7707	36.5906	48.7899
Snrpe	55.5413	0.169251	0.258955	3.71909	0.445356	0.999791	65.4383	69.1086	53.7763	72.1332	36.2045	56.7094	43.3781	56.6564	46.4666
Snrpf	47.2281	-0.437501	0.288396	1.01154	0.908042	0.999791	40.0883	54.2996	36.5679	46.7891	27.1534	58.6992	51.5115	47.2137	62.7299
Snrpg	97.1927	0.71205	0.203016	0.972896	0.913878	0.999791	99.6312	120.117	127.988	120.872	112.234	71.633	75.9116	72.0008	74.3465
Snx5	53.3545	-1.06085	0.282217	2.29527	0.681631	0.999791	50.6999	46.0724	25.8126	29.2432	39.8249	69.1457	74.5561	74.3615	70.4743
Sp110	43.1419	1.08713	0.29015	3.1479	0.533386	0.999791	35.9616	44.427	66.6826	56.5369	72.409	32.3343	25.3039	25.9675	28.6544
Spi1	51.2134	-1.99389	0.310417	5.93956	0.203708	0.999791	42.4464	13.1635	29.0392	21.445	19.9125	82.0794	79.5265	87.3453	85.9632
Srgn	53.2055	-0.727632	0.266958	1.25006	0.869789	0.999791	32.4244	37.8452	34.4168	50.6882	47.0658	72.6279	68.682	70.8205	64.2788
Srsf2	51.0208	-0.211885	0.268211	1.24366	0.87086	0.999791	56.0057	41.1361	39.7945	56.5369	50.6863	58.2018	48.8003	48.394	59.6321
Srsf3	114.873	0.943812	0.198089	2.72526	0.604801	0.999791	107.295	167.835	141.969	142.317	157.49	72.1304	86.3043	82.6239	75.8954
Ssr1	41.3404	0.0532756	0.287711	0.973002	0.913862	0.999791	47.1627	42.7815	45.1721	37.0414	39.8249	38.8012	40.2151	33.0496	48.0155
Ssr4	77.6465	0.138634	0.220363	1.13875	0.888077	0.999791	68.9755	88.8539	82.8155	83.8305	74.2192	74.6177	75.9116	81.4436	68.151
Ssrp1	50.0172	1.59602	0.286449	1.49873	0.826867	0.999791	57.1848	59.2359	75.2868	85.7801	74.2192	31.3394	17.1705	23.6068	26.3311
Sub1	89.602	-0.520498	0.214685	5.51629	0.238301	0.999791	87.251	98.7266	64.5316	60.436	72.409	131.327	93.534	94.4273	103.775
Sumo2	55.1944	-0.541861	0.270599	2.08802	0.719575	0.999791	60.1325	42.7815	31.1903	54.5873	52.4965	70.1406	63.7116	56.6564	65.0532
Surf4	51.9343	0.61113	0.262518	0.798996	0.938583	0.999791	58.3639	54.2996	70.9847	66.2846	56.117	45.7655	43.3781	36.5906	35.6244
Syngr2	140.636	0.55783	0.186165	3.31992	0.505782	0.999791	157.406	208.971	168.858	150.115	133.957	120.383	122.001	95.6077	108.422
Taf10	54.2051	0.517281	0.259319	2.10097	0.717195	0.999791	68.3859	64.1723	76.3624	42.89	63.3579	40.2935	49.2522	41.3119	41.8199
Tagln2	169.764	0.570018	0.192057	4.67343	0.322476	0.999791	163.89	138.217	183.915	272.937	229.898	136.799	125.164	134.559	142.498
Tap1	45.4455	-0.108687	0.287366	1.76059	0.779684	0.999791	33.0139	36.1997	48.3987	40.9405	54.3067	46.263	50.1559	62.5581	37.1733
Tapbp	100.049	0.0908021	0.242212	2.01015	0.733891	0.999791	91.9673	57.5905	138.743	101.376	124.905	103.967	91.7266	100.329	89.8354
Tcf25	51.5578	1.53733	0.261901	6.58911	0.159261	0.999791	41.2674	78.9812	75.2868	91.6287	68.7885	30.3445	25.7557	29.5085	22.4588
Tcp1	52.425	0.166602	0.267263	0.192371	0.99566	0.999791	56.0057	65.8177	59.1539	42.89	50.6863	47.2579	43.8299	54.2957	51.8877
Tgfb1	73.1513	0.453856	0.234004	1.41275	0.841976	0.999791	67.2069	70.754	94.6463	76.0323	99.5623	60.689	57.8374	72.0008	59.6321
Timm10b	44.4653	1.12216	0.281501	1.04767	0.902483	0.999791	49.5209	51.0087	64.5316	50.6882	74.2192	26.3649	28.015	29.5085	26.3311
Timm13	61.9671	1.84615	0.255923	6.03496	0.196553	0.999791	51.879	111.89	107.553	97.4773	77.8396	27.8573	23.4965	29.5085	30.2033
Tkt	85.9547	-0.0662482	0.223485	1.8153	0.769683	0.999791	91.9673	111.89	82.8155	74.0828	65.1681	90.0386	83.1413	88.5256	85.9632
Tle5	88.707	-0.190563	0.232101	3.31611	0.506383	0.999791	100.81	64.1723	117.232	72.1332	72.409	82.0794	89.9191	109.772	89.8354
Tma7	68.0384	0.644101	0.231884	1.42999	0.838966	0.999791	65.4383	72.3995	87.1176	91.6287	83.2703	51.7349	56.9337	51.935	51.8877
Tmbim6	79.3803	-0.88157	0.233734	3.61501	0.460607	0.999791	73.6917	49.3633	61.305	74.0828	41.6352	100.983	95.7933	119.214	98.3543
Tmed10	44.0748	-0.452606	0.284573	1.02479	0.906014	0.999791	34.193	39.4906	47.3232	31.1928	34.3943	46.7604	56.03	50.7547	56.5343
Tmed2	86.6655	0.51571	0.2193	2.9638	0.563901	0.999791	73.1022	82.2721	98.9484	113.074	123.095	77.1049	65.9708	76.7222	69.6999
Tmed3	66.3298	1.97026	0.244863	5.25684	0.261945	0.999791	64.2592	110.245	105.402	113.074	95.9419	32.8318	27.5632	25.9675	21.6844
Tmed9	41.3101	0.863907	0.288337	2.54693	0.636252	0.999791	35.9616	59.2359	55.9274	56.5369	43.4454	27.8573	24.852	37.7709	30.2033
Tmem256	44.6782	0.934338	0.282356	2.64209	0.619386	0.999791	38.3197	59.2359	65.6071	66.2846	47.0658	25.37	31.178	31.8692	37.1733
Tmpo	41.9804	0.291099	0.284378	4.62664	0.327795	0.999791	45.3941	34.5543	38.7189	70.1837	41.6352	31.8369	33.4373	47.2137	34.8499
Tmsb10	760.03	0.559551	0.131311	6.29	0.178513	0.999791	864.257	997.138	969.049	670.644	932.266	647.681	645.701	531.154	582.381
Tmsb4x	4216.48	0.115363	0.112191	1.75076	0.781477	0.999791	3886.21	4548	4153.68	4425.47	4588.92	4214.41	3946.5	4040.31	4144.82
Tnfaip8	45.0567	0.258734	0.280353	2.20805	0.697555	0.999791	54.8267	64.1723	41.9455	40.9405	43.4454	43.7757	34.341	47.2137	34.8499
Tomm20	47.9337	-1.20366	0.303346	1.9737	0.740597	0.999791	28.8872	42.7815	30.1147	35.0918	14.4818	66.6584	58.7411	82.6239	72.0232
Tomm6	59.6225	1.47925	0.256883	2.09449	0.718385	0.999791	61.3115	95.4357	81.74	87.7296	85.0805	26.3649	38.8595	28.3282	31.7522
Tomm7	63.1552	-0.273082	0.244634	2.43701	0.655949	0.999791	62.4906	47.7178	52.7008	64.335	65.1681	53.2273	76.8153	70.8205	75.121
Tpd52	48.8571	0.966699	0.269388	4.87198	0.300687	0.999791	41.2674	57.5905	60.2295	68.2341	77.8396	25.8675	39.3114	28.3282	41.0455
Tpi1	51.1694	0.439695	0.263405	2.16164	0.706058	0.999791	44.8046	57.5905	61.305	58.4864	59.7374	37.8063	43.8299	59.0171	37.9477
Tpm3	236.869	1.50582	0.163057	5.03814	0.283407	0.999791	244.657	309.343	358.15	364.565	365.665	121.876	140.075	109.772	117.715
Tpt1	1245.16	-0.38958	0.124625	2.37214	0.667669	0.999791	1224.46	1138.65	990.56	1099.54	1087.94	1324.21	1307.22	1467.16	1566.7
Tra2b	44.1174	0.521742	0.282214	2.59516	0.627681	0.999791	37.7302	67.4631	43.0211	46.7891	54.3067	38.8012	33.8891	44.853	30.2033
Trappc5	41.6989	1.50558	0.291706	5.53146	0.236978	0.999791	33.6034	55.945	73.1358	64.335	57.9272	22.8827	21.689	29.5085	16.2633
Tspo	59.5115	-0.135394	0.256806	0.938305	0.919002	0.999791	47.7522	51.0087	70.9847	44.8396	65.1681	68.1508	59.6449	66.0991	61.9554
Tubb5	261.951	0.431007	0.174014	3.17803	0.528487	0.999791	254.089	210.617	334.489	364.565	305.928	226.838	204.69	232.527	223.814
Txn1	76.2888	-1.77454	0.24999	0.891254	0.925812	0.999791	43.6255	41.1361	29.0392	38.9909	38.0147	129.337	125.616	121.575	119.264
Tyrobp	412.738	0.233012	0.149324	4.17944	0.382266	0.999791	344.288	373.515	437.739	487.387	530.396	382.042	404.41	377.709	377.154
Uba52	802.678	0.419448	0.131032	2.07232	0.722458	0.999791	845.981	870.439	920.651	898.741	950.368	649.671	598.708	703.483	786.06
Ubald2	43.9577	0.982653	0.298169	2.85663	0.582098	0.999791	44.215	32.9089	62.3805	85.7801	56.117	28.8522	28.015	27.1479	30.2033
Ubb	203.964	-1.43605	0.17343	7.14966	0.128188	0.999791	175.092	123.408	114.006	97.4773	112.234	315.881	286.928	293.905	316.747
Ubc	157.623	-0.203503	0.184703	1.77159	0.777675	0.999791	130.877	131.635	181.764	146.216	139.387	192.016	177.127	154.625	164.956
Ube2d2a	43.2378	-0.0241863	0.291292	0.598515	0.963229	0.999791	46.5732	46.0724	33.3413	37.0414	54.3067	36.8114	45.1855	47.2137	42.5944
Ube2d3	71.0705	-0.0682542	0.236497	1.03086	0.905081	0.999791	71.9231	78.9812	77.4379	56.5369	63.3579	65.1661	77.2672	66.0991	82.8654
Ube2l3	60.4041	0.641504	0.244651	1.58803	0.810942	0.999791	66.0278	75.6904	55.9274	76.0323	85.0805	46.7604	42.9262	44.853	50.3388
Ube2m	44.0493	0.648032	0.292695	0.744242	0.945763	0.999791	41.8569	57.5905	58.0784	60.436	39.8249	33.3292	32.0817	28.3282	44.9177
Ube2v1	55.0198	1.68154	0.258729	5.12354	0.274855	0.999791	50.6999	80.6267	82.8155	101.376	74.2192	29.8471	24.4002	29.5085	21.6844
Ubl5	51.802	-0.326946	0.266055	2.54917	0.635853	0.999791	57.1848	47.7178	50.5497	37.0414	45.2556	51.7349	61.0004	46.0333	69.6999
Ubtf	44.9472	2.16567	0.291782	3.82009	0.430901	0.999791	45.3941	77.3358	65.6071	68.2341	83.2703	19.898	16.7186	11.8034	16.2633
Ucp2	162.049	-0.435657	0.208917	4.32855	0.363363	0.999791	152.1	74.0449	169.933	159.863	161.11	177.59	172.157	181.773	209.874
Unc93b1	121.286	-0.209487	0.222681	2.83757	0.585365	0.999791	124.981	64.1723	112.93	157.913	123.095	129.337	132.845	123.936	122.362
Uqcr10	67.1924	1.48795	0.244039	1.96874	0.741509	0.999791	70.1545	108.599	87.1176	91.6287	106.803	35.319	37.504	38.9513	28.6544
Uqcr11	63.5322	0.897965	0.241355	2.63586	0.620484	0.999791	58.9534	98.7266	81.74	70.1837	83.2703	45.268	49.704	43.6726	40.271
Uqcrc1	62.9501	1.26496	0.246689	2.62462	0.622468	0.999791	67.2069	80.6267	101.099	103.326	68.7885	40.791	37.9558	34.2299	32.5266
Uqcrh	124.429	0.78089	0.18991	1.24437	0.870741	0.999791	137.951	162.899	155.951	144.266	155.679	101.977	77.7191	89.7059	93.7076
Uqcrq	76.7766	1.32612	0.223786	6.4389	0.168681	0.999791	64.8487	102.017	124.761	95.5278	124.905	40.2935	46.5411	44.853	47.241
Use1	72.8902	1.18151	0.228804	6.77092	0.148501	0.999791	60.722	110.245	94.6463	95.5278	112.234	45.7655	43.3781	35.4102	58.0832
Vasp	49.5064	-0.816218	0.283187	4.0144	0.404061	0.999791	48.9313	42.7815	35.4924	44.8396	21.7227	80.5871	59.193	55.476	56.5343
Vcp	69.489	0.787639	0.231313	3.8134	0.431848	0.999791	58.3639	93.7902	94.6463	95.5278	74.2192	47.2579	51.0596	60.1974	50.3388
Wdr1	89.6313	-0.16171	0.231442	1.12897	0.88965	0.999791	80.1766	108.599	76.3624	101.376	59.7374	98.4953	93.9858	82.6239	105.324
Wfdc17	41.5302	1.65951	0.317509	3.69985	0.448148	0.999791	40.0883	41.1361	57.0029	87.7296	70.5987	17.9082	23.4965	11.8034	24.0077
Ybx1	84.3879	-1.59612	0.240119	2.98509	0.560323	0.999791	64.8487	44.427	51.6253	37.0414	38.0147	121.378	127.423	134.559	140.174
Ywhab	43.7472	0.520345	0.280766	1.89693	0.754708	0.999791	46.5732	55.945	53.7763	48.7387	45.2556	34.8216	42.9262	40.1316	25.5566
Ywhae	71.6121	-0.992625	0.255763	0.941524	0.918529	0.999791	59.5429	32.9089	61.305	48.7387	52.4965	106.952	90.371	106.231	85.9632
Ywhag	52.4306	-0.204657	0.263844	0.789661	0.939829	0.999791	53.6476	52.6542	48.3987	44.8396	47.0658	55.2171	55.1263	68.4598	46.4666
Ywhah	87.4687	-0.567277	0.216846	1.51995	0.823102	0.999791	74.8708	59.2359	70.9847	76.0323	81.4601	92.5259	110.704	116.854	104.55
Ywhaz	104.304	-0.0917917	0.200967	0.0703528	0.999396	0.999791	103.758	97.0811	104.326	93.5783	108.613	108.444	103.927	112.132	106.873
Zfp36l2	74.9991	-0.63629	0.244263	0.998999	0.909948	0.999791	74.2813	70.754	62.3805	60.436	41.6352	84.5667	92.1784	84.9846	103.775
Zfp706	42.8419	-0.428004	0.286273	0.763467	0.943278	0.999791	41.8569	31.2634	39.7945	35.0918	39.8249	44.2731	48.8003	56.6564	48.0155
Zyx	52.019	-0.26604	0.272712	1.12494	0.890294	0.999791	56.5953	51.0087	45.1721	35.0918	54.3067	44.7706	55.1263	64.9188	61.181
0610009B22Rik	4.32508	-1.04377	0.888702	4.00241	0.40568		2.35814	3.29089	2.15105	3.89909	1.81022	6.96432	5.87411	11.8034	0.774443
0610009E02Rik	0.0552723	0.580731	3.52406	0.196393	0.995483		0	0	0	0	0	0.497451	0	0	0
0610009L18Rik	1.10128	1.01157	1.73279	2.56586	0.632882		2.35814	3.29089	0	0	1.81022	0.497451	0	1.18034	0.774443
0610010F05Rik	2.01496	-1.95169	1.34724	2.67399	0.613773		2.35814	0	1.07553	1.94955	0	0.994902	3.16298	4.72137	3.87221
0610010K14Rik	9.30163	-0.303593	0.573475	1.64227	0.801176		8.25348	9.87266	6.45316	11.6973	5.43067	11.9388	5.87411	11.8034	12.3911
0610012G03Rik	25.5816	0.616644	0.376619	3.32193	0.505466		25.35	37.8452	21.5105	15.5964	50.6863	16.9133	16.2668	23.6068	22.4588
0610030E20Rik	5.49262	-0.758933	0.802955	1.94882	0.745171		6.48487	8.22721	4.30211	3.89909	0	7.95922	7.68153	2.36068	8.51887
0610038B21Rik	0.464947	2.5312	2.74387	0.554153	0.96802		0.589534	1.64544	0	1.94955	0	0	0	0	0
0610039K10Rik	0.0502061	0.556333	3.52771	0.113493	0.99845		0	0	0	0	0	0	0.451855	0	0
0610040B10Rik	0.54978	1.47369	2.52164	2.36748	0.668512		0	1.64544	0	0	1.81022	1.49235	0	0	0
0610040J01Rik	0.530974	0.0242225	2.40036	1.60834	0.807292		0.589534	1.64544	0	0	0	0.994902	0	0	1.54889
1010001B22Rik	0.0552723	0.580731	3.52406	0.196393	0.995483		0	0	0	0	0	0.497451	0	0	0
1110002J07Rik	0.105478	-0.0379606	3.5087	0.0949498	0.998908		0	0	0	0	0	0.497451	0.451855	0	0
1110002L01Rik	0.59645	-0.112838	2.14097	1.42023	0.840671		0.589534	0	2.15105	0	0	0.497451	1.35556	0	0.774443
1110004F10Rik	14.6597	-1.01912	0.487425	0.766088	0.942936		10.6116	11.5181	15.0574	7.79819	5.43067	19.898	19.4298	23.6068	18.5866
1110006O24Rik	0.170982	-0.0378713	3.5087	0.202552	0.995205		0.589534	0	0	0	0	0.497451	0.451855	0	0
1110008P14Rik	10.303	0.364254	0.543519	1.95518	0.744002		12.9697	18.0999	8.60421	9.74773	9.05112	11.4414	9.94081	5.90171	6.96999
1110013H19Rik	0.0860492	0.554858	3.52792	0.354142	0.986056		0	0	0	0	0	0	0	0	0.774443
1110019D14Rik	0.0502061	0.556333	3.52771	0.113493	0.99845		0	0	0	0	0	0	0.451855	0	0
1110020A21Rik	0.119503	1.90859	3.52802	0.242736	0.993205		0	0	1.07553	0	0	0	0	0	0
1110025M09Rik	0.965851	-0.643876	1.68663	0.615892	0.961282		1.17907	0	1.07553	0	1.81022	0.994902	0.90371	1.18034	1.54889
1110028F11Rik	0.0502061	0.556333	3.52771	0.113493	0.99845		0	0	0	0	0	0	0.451855	0	0
1110032A03Rik	2.87063	-0.52905	1.03478	0.930285	0.920176		2.94767	1.64544	1.07553	1.94955	5.43067	2.48726	4.06669	2.36068	3.87221
1110032F04Rik	0.155685	-0.332704	3.49546	0.168316	0.996651		0	0	0	0	0	0.497451	0.90371	0	0
1110035H17Rik	0.120776	0.580821	3.52406	0.304	0.989555		0.589534	0	0	0	0	0.497451	0	0	0
1110038B12Rik	9.10918	-0.859466	0.587945	0.462442	0.977053		5.89534	8.22721	7.52868	5.84864	5.43067	12.4363	14.0075	9.44273	13.1655
1110038F14Rik	5.66595	-0.366525	0.76879	1.58909	0.810751		10.0221	1.64544	5.37763	7.79819	3.62045	5.96941	7.22968	2.36068	6.96999
1110046J04Rik	0.11571	0.556423	3.52771	0.2211	0.994322		0.589534	0	0	0	0	0	0.451855	0	0
1110051M20Rik	1.00954	-1.91006	1.78565	0.947296	0.91768		0	1.64544	0	0	0	0.994902	1.35556	3.54102	1.54889
1110059E24Rik	4.97863	-0.21336	0.797313	0.920505	0.921601		4.71627	4.93633	6.45316	0	7.2409	4.97451	3.61484	5.90171	6.96999
1110059G10Rik	3.30786	-2.39777	1.15656	3.25534	0.51604		4.71627	0	2.15105	0	1.81022	3.97961	5.42226	4.72137	6.96999
1110065P20Rik	4.88486	-0.597818	0.810542	2.40829	0.66113		7.66394	1.64544	3.22658	3.89909	5.43067	4.47706	3.16298	8.26239	6.19554
1190001M18Rik	0.0502061	0.556333	3.52771	0.113493	0.99845		0	0	0	0	0	0	0.451855	0	0
1190005I06Rik	0.182827	1.93753	3.53185	0.418463	0.980938		0	1.64544	0	0	0	0	0	0	0
1190007I07Rik	2.54078	-0.56688	1.12637	0.597347	0.963358		2.35814	1.64544	4.30211	0	1.81022	1.49235	2.25927	5.90171	3.09777
1300002E11Rik	0.631176	0.16032	2.21481	1.87632	0.758493		1.17907	0	2.15105	0	0	0.994902	1.35556	0	0
1300014J16Rik	0.251342	1.23219	3.5335	0.483204	0.975115		0	0	0	0	1.81022	0	0.451855	0	0
1500002C15Rik	0.0502061	0.556333	3.52771	0.113493	0.99845		0	0	0	0	0	0	0.451855	0	0
1500004A13Rik	0.0552723	0.580731	3.52406	0.196393	0.995483		0	0	0	0	0	0.497451	0	0	0
1500009L16Rik	0.0655038	1.23144	3.53373	0.139814	0.997667		0.589534	0	0	0	0	0	0	0	0
1500011B03Rik	8.02825	0.797607	0.637459	1.13543	0.888611		11.7907	6.58177	17.2084	3.89909	10.8613	4.97451	4.06669	5.90171	6.96999
1500015A07Rik	1.14953	0.293977	1.67459	0.207144	0.994993		1.17907	0	3.22658	1.94955	0	1.9898	0.451855	0	1.54889
1500032F14Rik	0.0552723	0.580731	3.52406	0.196393	0.995483		0	0	0	0	0	0.497451	0	0	0
1600010M07Rik	3.76047	1.79436	0.969041	0.973565	0.913778		8.84301	3.29089	3.22658	7.79819	5.43067	0.994902	2.71113	0	1.54889
1600012H06Rik	5.82242	0.325425	0.692979	0.296592	0.990033		4.71627	8.22721	5.37763	5.84864	7.2409	4.97451	5.87411	4.72137	5.4211
1600012P17Rik	0.357602	1.905	2.99215	0.936746	0.919231		0	1.64544	1.07553	0	0	0.497451	0	0	0
1600014C10Rik	4.09403	-1.89052	0.984257	0.758559	0.943916		2.35814	1.64544	1.07553	0	5.43067	7.95922	5.87411	7.08205	5.4211
1600020E01Rik	1.59121	-1.29019	1.51818	1.48941	0.828515		3.5372	0	0	1.94955	1.81022	2.48726	1.80742	1.18034	1.54889
1700001G11Rik	0.0552723	0.580731	3.52406	0.196393	0.995483		0	0	0	0	0	0.497451	0	0	0
1700001G17Rik	0.0502061	0.556333	3.52771	0.113493	0.99845		0	0	0	0	0	0	0.451855	0	0
1700001J03Rik	0.0502061	0.556333	3.52771	0.113493	0.99845		0	0	0	0	0	0	0.451855	0	0
1700001L05Rik	0.151553	0.554948	3.52792	0.461748	0.977116		0.589534	0	0	0	0	0	0	0	0.774443
1700001O22Rik	0.0552723	0.580731	3.52406	0.196393	0.995483		0	0	0	0	0	0.497451	0	0	0
1700003E16Rik	0.216616	1.88136	3.52396	0.630713	0.95959		0	0	0	1.94955	0	0	0	0	0
1700007E05Rik	0.131149	0.524317	3.53196	0.570973	0.966234		0	0	0	0	0	0	0	1.18034	0
1700007L15Rik	0.693806	0.173353	2.22829	1.14179	0.887587		0.589534	0	2.15105	0	0	0	0	1.18034	2.32333
1700008J07Rik	0.406195	0.333153	2.63899	0.977638	0.913168		1.17907	0	1.07553	0	0	0.497451	0.90371	0	0
1700009J07Rik	0.131149	0.524317	3.53196	0.570973	0.966234		0	0	0	0	0	0	0	1.18034	0
1700009N14Rik	0.131149	0.524317	3.53196	0.570973	0.966234		0	0	0	0	0	0	0	1.18034	0
1700010I14Rik	0.185007	1.90867	3.52802	0.112863	0.998466		0.589534	0	1.07553	0	0	0	0	0	0
1700012B09Rik	0.0552723	0.580731	3.52406	0.196393	0.995483		0	0	0	0	0	0.497451	0	0	0
1700012C14Rik	0.0552723	0.580731	3.52406	0.196393	0.995483		0	0	0	0	0	0.497451	0	0	0
1700012D14Rik	0.0502061	0.556333	3.52771	0.113493	0.99845		0	0	0	0	0	0	0.451855	0	0
1700016F12Rik	0.0502061	0.556333	3.52771	0.113493	0.99845		0	0	0	0	0	0	0.451855	0	0
1700016P03Rik	0.216616	1.88136	3.52396	0.630713	0.95959		0	0	0	1.94955	0	0	0	0	0
1700017B05Rik	6.11976	0.368634	0.706794	2.0263	0.730922		4.71627	4.93633	9.67974	5.84864	7.2409	8.95412	6.32597	1.18034	6.19554
1700018L02Rik	0.445125	1.11281	2.99435	1.41797	0.841066		0	1.64544	0	0	0	0	0	2.36068	0
1700020L13Rik	0.0502061	0.556333	3.52771	0.113493	0.99845		0	0	0	0	0	0	0.451855	0	0
1700020L24Rik	0.131149	0.524317	3.53196	0.570973	0.966234		0	0	0	0	0	0	0	1.18034	0
1700022N22Rik	0.0860492	0.554858	3.52792	0.354142	0.986056		0	0	0	0	0	0	0	0	0.774443
1700025G04Rik	16.7754	0.19086	0.436408	2.27613	0.685119		18.2756	14.809	10.7553	17.5459	28.9636	16.9133	11.2964	17.7051	14.7144
1700028N14Rik	0.0655038	1.23144	3.53373	0.139814	0.997667		0.589534	0	0	0	0	0	0	0	0
1700029I15Rik	0.358509	2.24687	3.49296	0.725457	0.948153		0	0	3.22658	0	0	0	0	0	0
1700030C10Rik	0.0860492	0.554858	3.52792	0.354142	0.986056		0	0	0	0	0	0	0	0	0.774443
1700030J22Rik	0.227371	-0.334435	3.49555	0.422563	0.980588		0	0	0	0	0	0.497451	0	0	1.54889
1700030K09Rik	1.79311	-0.0893519	1.36502	4.02053	0.403234		1.17907	0	1.07553	7.79819	0	0.497451	0.90371	2.36068	2.32333
1700034P13Rik	0.233033	1.12934	3.52129	0.364153	0.985305		0	1.64544	0	0	0	0	0.451855	0	0
1700037C18Rik	1.56689	0.1401	1.34385	0.704489	0.950774		0.589534	0	3.22658	1.94955	1.81022	2.48726	0.90371	2.36068	0.774443
1700037H04Rik	5.05836	-0.937667	0.789123	0.702145	0.951064		2.94767	3.29089	5.37763	3.89909	1.81022	7.46177	5.87411	9.44273	5.4211
1700040D17Rik	0.11571	0.556423	3.52771	0.2211	0.994322		0.589534	0	0	0	0	0	0.451855	0	0
1700041G16Rik	0.182827	1.93753	3.53185	0.418463	0.980938		0	1.64544	0	0	0	0	0	0	0
1700048O20Rik	0.290485	0.59614	3.00904	0.437363	0.979305		0.589534	0	1.07553	0	0	0.497451	0.451855	0	0
1700052K11Rik	1.08374	1.13577	1.73444	1.98203	0.739065		0	0	2.15105	1.94955	1.81022	2.48726	1.35556	0	0
1700055D18Rik	0.0860492	0.554858	3.52792	0.354142	0.986056		0	0	0	0	0	0	0	0	0.774443
1700056E22Rik	1.42517	0.753524	1.49638	3.04634	0.550101		0.589534	4.93633	0	3.89909	0	0.994902	0.451855	1.18034	0.774443
1700056N10Rik	0.0860492	0.554858	3.52792	0.354142	0.986056		0	0	0	0	0	0	0	0	0.774443
1700063J08Rik	0.0502061	0.556333	3.52771	0.113493	0.99845		0	0	0	0	0	0	0.451855	0	0
1700066B19Rik	0.0860492	0.554858	3.52792	0.354142	0.986056		0	0	0	0	0	0	0	0	0.774443
1700066M21Rik	2.55861	-0.120839	1.07148	1.47495	0.831069		2.94767	1.64544	2.15105	1.94955	3.62045	0.994902	2.71113	2.36068	4.64666
1700073E17Rik	0.182827	1.93753	3.53185	0.418463	0.980938		0	1.64544	0	0	0	0	0	0	0
1700084E18Rik	0.131149	0.524317	3.53196	0.570973	0.966234		0	0	0	0	0	0	0	1.18034	0
1700086O06Rik	0.421634	-0.0287105	2.4672	0.559334	0.967474		0.589534	0	1.07553	0	0	0.497451	0.451855	1.18034	0
1700087I21Rik	0.0552723	0.580731	3.52406	0.196393	0.995483		0	0	0	0	0	0.497451	0	0	0
1700088E04Rik	0.172098	0.261568	3.51144	0.629296	0.959753		0	0	0	0	0	0	0	0	1.54889
1700094D03Rik	0.674534	-0.496668	2.12247	0.754483	0.944444		1.7686	0	1.07553	0	0	0.497451	0	1.18034	1.54889
1700096K18Rik	0.670864	-1.88396	2.17286	0.807987	0.937374		0.589534	0	0	0	0	0.994902	1.35556	0	3.09777
1700097N02Rik	0.0655038	1.23144	3.53373	0.139814	0.997667		0.589534	0	0	0	0	0	0	0	0
1700099I09Rik	0.262298	0.375305	3.49942	0.852232	0.931312		0	0	0	0	0	0	0	2.36068	0
1700101I11Rik	0.196653	0.524406	3.53196	0.678578	0.953944		0.589534	0	0	0	0	0	0	1.18034	0
1700102H20Rik	0.288305	0.573202	3.25773	0.715575	0.949394		0	1.64544	0	0	0	0.497451	0.451855	0	0
1700102P08Rik	0.100412	0.255999	3.51218	0.294189	0.990186		0	0	0	0	0	0	0.90371	0	0
1700109H08Rik	0.332326	1.20294	3.12941	0.483447	0.975092		0.589534	0	0	1.94955	0	0	0.451855	0	0
1700113A16Rik	0.305924	0.463773	3.20796	0.444252	0.978696		0	0	1.07553	0	0	0.497451	0	1.18034	0
1700113H08Rik	0.182827	1.93753	3.53185	0.418463	0.980938		0	1.64544	0	0	0	0	0	0	0
1700120C14Rik	0.201136	1.90711	3.52782	0.53154	0.970359		0	0	0	0	1.81022	0	0	0	0
1700123M08Rik	0.690081	1.23049	2.12889	1.50816	0.825195		1.17907	0	0	1.94955	1.81022	0.497451	0	0	0.774443
1700123O20Rik	6.68707	-0.320316	0.699108	1.6484	0.800069		5.30581	11.5181	6.45316	0	7.2409	6.96432	6.32597	7.08205	9.29332
1810006J02Rik	0.181355	-0.0793692	3.51575	0.342255	0.986926		0	0	0	0	0	0	0.451855	1.18034	0
1810009A15Rik	9.93998	-0.800701	0.579564	2.46558	0.65081		14.1488	4.93633	9.67974	3.89909	9.05112	10.4465	13.1038	11.8034	12.3911
1810013L24Rik	6.75286	-1.41859	0.743328	1.42957	0.839039		7.07441	3.29089	4.30211	0	7.2409	7.95922	9.0371	11.8034	10.0678
1810014B01Rik	1.31931	-1.24237	1.52193	1.26058	0.868028		1.7686	1.64544	1.07553	0	0	1.9898	2.25927	2.36068	0.774443
1810021B22Rik	0.402543	-1.10309	2.65061	0.483138	0.975122		0.589534	0	0	0	0	0.497451	1.35556	1.18034	0
1810024B03Rik	0.993944	1.12306	1.78163	3.36703	0.498383		1.7686	1.64544	3.22658	0	0	0.497451	1.80742	0	0
1810030O07Rik	4.69619	-0.491583	0.806625	1.27361	0.865837		5.30581	6.58177	3.22658	3.89909	1.81022	5.96941	4.51855	7.08205	3.87221
1810034E14Rik	0.796523	1.04299	1.87415	1.19568	0.87881		0	1.64544	1.07553	1.94955	0	0.497451	0.451855	0	1.54889
1810037I17Rik	14.121	-0.915684	0.496036	2.99517	0.558634		16.507	13.1635	8.60421	11.6973	5.43067	16.9133	23.4965	18.8855	12.3911
1810041H14Rik	0.18628	0.580858	3.52406	0.539907	0.969502		1.17907	0	0	0	0	0.497451	0	0	0
1810044D09Rik	1.40371	-0.14766	1.4441	1.71394	0.788185		2.35814	0	1.07553	1.94955	1.81022	0.497451	1.80742	2.36068	0.774443
1810055G02Rik	0.523518	0.969899	2.24901	1.24629	0.87042		0.589534	1.64544	1.07553	0	0	0.497451	0.90371	0	0
1810058I24Rik	37.0888	1.15051	0.302145	3.43796	0.487374		28.8872	54.2996	50.5497	58.4864	47.0658	21.3904	24.4002	20.0658	28.6544
1810062G17Rik	0.0552723	0.580731	3.52406	0.196393	0.995483		0	0	0	0	0	0.497451	0	0	0
1810062O18Rik	0.0655038	1.23144	3.53373	0.139814	0.997667		0.589534	0	0	0	0	0	0	0	0
1810064F22Rik	0.0552723	0.580731	3.52406	0.196393	0.995483		0	0	0	0	0	0.497451	0	0	0
1810065E05Rik	0.119503	1.90859	3.52802	0.242736	0.993205		0	0	1.07553	0	0	0	0	0	0
2010001A14Rik	0.823103	1.23581	2.02941	2.88599	0.577082		0	1.64544	3.22658	0	0	0	1.35556	1.18034	0
2010008C14Rik	4.51548	-0.473322	0.829675	1.88257	0.757346		4.71627	1.64544	5.37763	3.89909	3.62045	2.48726	4.06669	7.08205	7.74443
2010013B24Rik	0.0860492	0.554858	3.52792	0.354142	0.986056		0	0	0	0	0	0	0	0	0.774443
2010016I18Rik	0.0860492	0.554858	3.52792	0.354142	0.986056		0	0	0	0	0	0	0	0	0.774443
2010109A12Rik	0.0552723	0.580731	3.52406	0.196393	0.995483		0	0	0	0	0	0.497451	0	0	0
2010110K18Rik	0.0502061	0.556333	3.52771	0.113493	0.99845		0	0	0	0	0	0	0.451855	0	0
2010204K13Rik	0.808342	1.8965	2.0683	2.66706	0.614991		1.17907	3.29089	0	0	1.81022	0.994902	0	0	0
2010309G21Rik	0.0552723	0.580731	3.52406	0.196393	0.995483		0	0	0	0	0	0.497451	0	0	0
2010315B03Rik	5.07718	0.971489	0.82499	1.01104	0.908117		8.84301	9.87266	7.52868	7.79819	0	2.98471	3.61484	1.18034	3.87221
2010320M18Rik	2.39478	0.11098	1.14432	0.577077	0.965577		3.5372	4.93633	2.15105	0	1.81022	1.49235	1.35556	4.72137	1.54889
2210016F16Rik	5.53748	-0.186488	0.731128	0.905634	0.923751		5.89534	6.58177	6.45316	3.89909	3.62045	5.96941	7.68153	3.54102	6.19554
2210016L21Rik	7.94742	0.317115	0.619363	1.06818	0.899288		7.07441	8.22721	10.7553	7.79819	7.2409	7.95922	4.06669	12.9838	5.4211
2210406H18Rik	0.518748	-0.0161666	2.30038	1.30614	0.860332		0.589534	0	0	1.94955	0	0.497451	0.451855	1.18034	0
2210406O10Rik	0.119503	1.90859	3.52802	0.242736	0.993205		0	0	1.07553	0	0	0	0	0	0
2210408F21Rik	0.936995	-1.70537	1.82836	1.40103	0.844016		0	0	1.07553	0	0	0.497451	1.80742	1.18034	3.87221
2210418O10Rik	0.771295	-2.15628	1.95964	1.19579	0.878791		1.17907	0	0	0	0	0.497451	1.35556	2.36068	1.54889
2300009A05Rik	5.23454	-0.254648	0.734611	2.14669	0.708799		1.7686	6.58177	4.30211	3.89909	5.43067	7.46177	3.61484	7.08205	6.96999
2310001H17Rik	1.63303	1.05179	1.33868	1.73735	0.783922		1.17907	1.64544	3.22658	1.94955	1.81022	0.994902	2.71113	1.18034	0
2310001K24Rik	0.182827	1.93753	3.53185	0.418463	0.980938		0	1.64544	0	0	0	0	0	0	0
2310009B15Rik	4.61058	0.475371	0.881639	5.41304	0.24748		4.71627	4.93633	0	9.74773	7.2409	0.497451	2.25927	5.90171	6.19554
2310010J17Rik	3.35708	-0.0430936	0.908996	0.766584	0.942871		1.7686	1.64544	3.22658	5.84864	3.62045	3.97961	2.71113	3.54102	3.87221
2310011J03Rik	21.6567	1.44739	0.394278	2.08439	0.72024		21.8128	18.0999	33.3413	33.1423	43.4454	11.9388	11.2964	9.44273	12.3911
2310015A10Rik	1.18373	1.75714	1.65299	0.649378	0.957422		1.7686	0	3.22658	1.94955	1.81022	0.994902	0.90371	0	0
2310022A10Rik	2.53004	-1.47769	1.206	1.27583	0.865463		2.35814	1.64544	4.30211	0	0	2.98471	4.06669	3.54102	3.87221
2310022B05Rik	2.88511	0.275467	1.01191	1.4119	0.842124		1.7686	1.64544	1.07553	5.84864	5.43067	1.49235	3.61484	3.54102	1.54889
2310033P09Rik	3.07065	0.939688	0.964885	1.06842	0.899249		2.94767	4.93633	5.37763	1.94955	3.62045	1.49235	2.25927	1.18034	3.87221
2310034G01Rik	0.503802	1.86229	2.62468	2.05433	0.725767		0	0	0	1.94955	1.81022	0	0	0	0.774443
2310039H08Rik	8.96681	1.07055	0.582907	1.68685	0.793105		10.0221	13.1635	9.67974	11.6973	12.6716	9.94902	4.51855	5.90171	3.09777
2310040G24Rik	1.89672	-1.10096	1.31065	0.671595	0.954785		0.589534	1.64544	1.07553	1.94955	0	0.994902	2.25927	2.36068	6.19554
2310043P16Rik	0.141322	-0.0390657	3.50888	0.269053	0.991723		0	0	0	0	0	0.497451	0	0	0.774443
2310047D07Rik	0.0655038	1.23144	3.53373	0.139814	0.997667		0.589534	0	0	0	0	0	0	0	0
2310057M21Rik	1.67876	-1.82894	1.46193	2.99879	0.558028		1.7686	0	0	3.89909	0	0.994902	1.80742	3.54102	3.09777
2310058D17Rik	0.141322	-0.0390657	3.50888	0.269053	0.991723		0	0	0	0	0	0.497451	0	0	0.774443
2310061I04Rik	2.76512	-2.03444	1.17141	0.937336	0.919144		1.7686	1.64544	1.07553	1.94955	0	4.47706	4.9704	5.90171	3.09777
2310074N15Rik	0.0655038	1.23144	3.53373	0.139814	0.997667		0.589534	0	0	0	0	0	0	0	0
2410002F23Rik	8.24556	1.40858	0.639671	2.60533	0.625879		12.9697	11.5181	12.9063	7.79819	10.8613	9.45157	3.61484	3.54102	1.54889
2410003L11Rik	0.0552723	0.580731	3.52406	0.196393	0.995483		0	0	0	0	0	0.497451	0	0	0
2410004B18Rik	4.08433	-0.00114706	0.842376	1.16772	0.883383		2.94767	6.58177	4.30211	1.94955	3.62045	5.96941	3.16298	5.90171	2.32333
2410004P03Rik	0.282702	-0.0817522	3.31302	0.645798	0.957841		0.589534	0	0	0	0	0	0	1.18034	0.774443
2410018L13Rik	0.0860492	0.554858	3.52792	0.354142	0.986056		0	0	0	0	0	0	0	0	0.774443
2410022M11Rik	1.20667	0.526885	1.4995	1.94479	0.745913		1.17907	1.64544	2.15105	0	1.81022	1.49235	1.80742	0	0.774443
2500002B13Rik	0.18628	0.580858	3.52406	0.539907	0.969502		1.17907	0	0	0	0	0.497451	0	0	0
2500004C02Rik	0.206825	-0.0389764	3.50888	0.376656	0.984343		0.589534	0	0	0	0	0.497451	0	0	0.774443
2510002D24Rik	2.20394	0.492097	1.29111	3.65771	0.454306		5.30581	0	4.30211	0	3.62045	4.47706	1.35556	0	0.774443
2510009E07Rik	1.83928	0.142752	1.29235	4.80084	0.308349		0.589534	1.64544	1.07553	5.84864	0	0.994902	0.90371	4.72137	0.774443
2510016D11Rik	3.44903	0.951099	0.935451	0.146767	0.997436		4.12674	1.64544	6.45316	5.84864	3.62045	2.98471	0.90371	2.36068	3.09777
2510039O18Rik	17.8072	0.391461	0.418102	0.96181	0.915531		17.0965	13.1635	18.2839	23.3946	27.1534	16.9133	12.6519	15.3444	16.2633
2510046G10Rik	1.13505	1.23164	1.58753	2.81617	0.589044		0.589534	3.29089	1.07553	1.94955	0	0.497451	0.451855	2.36068	0
2600006K01Rik	0.186421	-0.0629533	3.51248	0.403244	0.98221		0	0	0	0	0	0.497451	0	1.18034	0
2610001J05Rik	8.25946	-0.786759	0.633281	1.19548	0.878842		8.84301	4.93633	5.37763	7.79819	5.43067	14.4261	7.68153	5.90171	13.94
2610002M06Rik	0.860612	-1.49117	1.8441	0.569601	0.966381		0.589534	0	0	0	1.81022	2.48726	0.90371	1.18034	0.774443
2610005L07Rik	1.78216	-0.447911	1.30501	0.101363	0.998758		1.17907	1.64544	1.07553	0	3.62045	1.49235	2.71113	3.54102	0.774443
2610008E11Rik	1.18488	1.11666	1.55271	2.18074	0.702558		1.7686	3.29089	1.07553	0	1.81022	1.49235	0.451855	0	0.774443
2610020C07Rik	0.174775	1.26249	3.52956	0.283657	0.990845		0	0	1.07553	0	0	0.497451	0	0	0
2610021A01Rik	0.604204	-1.99332	2.13189	0.383616	0.983796		0.589534	0	0	0	0	1.9898	0.90371	1.18034	0.774443
2610035D17Rik	0.769821	-1.11519	1.95908	1.26897	0.866617		1.17907	0	1.07553	0	0	0.994902	1.35556	0	2.32333
2610044O15Rik8	2.92683	0.117034	0.978884	2.98603	0.560165		0.589534	3.29089	3.22658	3.89909	1.81022	1.9898	1.35556	7.08205	3.09777
2610301B20Rik	1.22922	0.488731	1.48403	1.25511	0.868945		0.589534	1.64544	1.07553	3.89909	0	0.994902	0.90371	1.18034	0.774443
2610306M01Rik	0.508374	-0.303716	2.30232	0.808226	0.937342		0.589534	0	0	0	1.81022	0.497451	0.90371	0	0.774443
2610318N02Rik	5.93029	1.96787	0.752686	1.47675	0.830752		7.07441	11.5181	10.7553	7.79819	5.43067	1.9898	1.35556	5.90171	1.54889
2610507B11Rik	14.7584	0.0411799	0.458317	1.30565	0.860415		17.686	16.4544	13.9818	11.6973	16.292	12.9337	18.0742	9.44273	16.2633
2610507I01Rik	0.0552723	0.580731	3.52406	0.196393	0.995483		0	0	0	0	0	0.497451	0	0	0
2610528A11Rik	0.119503	1.90859	3.52802	0.242736	0.993205		0	0	1.07553	0	0	0	0	0	0
2700038G22Rik	0.503791	-1.20867	2.44624	0.885214	0.926672		0.589534	0	0	0	0	1.9898	0	1.18034	0.774443
2700049A03Rik	1.55483	-0.605329	1.42492	2.56724	0.632638		0.589534	4.93633	1.07553	0	0	2.98471	0.90371	1.18034	2.32333
2700054A10Rik	0.538816	1.25709	2.24914	1.05916	0.900696		1.17907	1.64544	1.07553	0	0	0.497451	0.451855	0	0
2700062C07Rik	4.45965	-0.158461	0.863793	2.84522	0.584053		2.35814	8.22721	5.37763	3.89909	0	2.48726	4.06669	10.6231	3.09777
2700081O15Rik	0.686916	1.3881	2.10595	0.659105	0.956275		0.589534	3.29089	1.07553	0	0	0	0.451855	0	0.774443
2700097O09Rik	1.28507	-0.585982	1.49591	1.67496	0.795262		0	1.64544	1.07553	0	1.81022	0.994902	1.35556	2.36068	2.32333
2700099C18Rik	0.698095	-0.863812	2.03812	1.28083	0.864619		1.17907	0	1.07553	0	0	1.49235	1.35556	1.18034	0
2810001G20Rik	0.957092	1.22775	1.83216	1.22484	0.873992		1.17907	1.64544	1.07553	1.94955	0	1.9898	0	0	0.774443
2810002D19Rik	0.428155	-1.72222	2.54517	0.0545219	0.999635		0	0	0	0	0	0.994902	0.90371	1.18034	0.774443
2810004N23Rik	4.7965	-0.018839	0.785559	0.340053	0.987084		4.71627	8.22721	5.37763	3.89909	1.81022	4.47706	4.51855	4.72137	5.4211
2810006K23Rik	2.55196	0.238828	1.13412	3.92309	0.416514		0.589534	3.29089	0	7.79819	1.81022	0.497451	2.71113	4.72137	1.54889
2810013P06Rik	1.53626	-1.79466	1.51355	1.95017	0.744924		1.7686	0	0	3.89909	0	1.9898	2.25927	2.36068	1.54889
2810021J22Rik	0.250652	1.33937	3.52127	0.645267	0.957903		0	0	1.07553	0	0	0	0	1.18034	0
2810025M15Rik	3.79991	1.76021	0.940573	0.781884	0.94086		5.89534	8.22721	4.30211	7.79819	1.81022	2.48726	1.35556	0	2.32333
2810029C07Rik	0.0502061	0.556333	3.52771	0.113493	0.99845		0	0	0	0	0	0	0.451855	0	0
2810039B14Rik	0.0655038	1.23144	3.53373	0.139814	0.997667		0.589534	0	0	0	0	0	0	0	0
2810402E24Rik	0.895296	-0.646686	2.01545	1.67992	0.794362		2.94767	0	0	0	1.81022	1.49235	1.80742	0	0
2810403D21Rik	0.293372	0.97425	3.48248	1.14932	0.886369		0	1.64544	0	0	0	0.994902	0	0	0
2810405F17Rik	0.367052	1.08932	2.99829	0.568748	0.966472		0.589534	0	0	0	1.81022	0	0.90371	0	0
2810408A11Rik	0.872714	2.29287	1.92947	2.05217	0.726164		0	3.29089	1.07553	0	1.81022	0.497451	0	1.18034	0
2810408I11Rik	0.804888	0.157005	1.88853	2.10783	0.715935		0	1.64544	2.15105	0	0	0.994902	0.90371	0	1.54889
2810410L24Rik	0.186421	-0.0629533	3.51248	0.403244	0.98221		0	0	0	0	0	0.497451	0	1.18034	0
2810414N06Rik	0.105478	-0.0379606	3.5087	0.0949498	0.998908		0	0	0	0	0	0.497451	0.451855	0	0
2810429I04Rik	0.397378	-1.33076	2.83282	0.278719	0.991146		0	0	0	0	0	1.49235	0.90371	1.18034	0
2810454H06Rik	0.28212	1.88144	3.52396	0.432632	0.979719		0.589534	0	0	1.94955	0	0	0	0	0
2810455O05Rik	0.0502061	0.556333	3.52771	0.113493	0.99845		0	0	0	0	0	0	0.451855	0	0
2900005J15Rik	0.181355	-0.0793692	3.51575	0.342255	0.986926		0	0	0	0	0	0	0.451855	1.18034	0
2900026A02Rik	0.756932	-1.92054	1.98908	1.55265	0.817275		1.17907	0	0	0	0	0.497451	0.451855	2.36068	2.32333
2900052L18Rik	0.210957	-0.597585	3.48594	0.216672	0.994539		0	0	0	0	0	0.994902	0.90371	0	0
2900060B14Rik	25.0032	2.58388	0.416531	9.03253	0.0602915		35.9616	14.809	36.5679	76.0323	36.2045	4.97451	4.06669	9.44273	6.96999
2900076A07Rik	0.893768	0.955957	1.9491	0.273868	0.991438		1.17907	0	2.15105	1.94955	0	1.9898	0	0	0.774443
2900089D17Rik	0.191528	-0.625247	3.48578	0.0804802	0.999212		0	0	0	0	0	0.497451	0.451855	0	0.774443
2900093K20Rik	1.56176	0.3176	1.38546	0.973715	0.913755		2.35814	1.64544	1.07553	0	3.62045	0.994902	0.451855	2.36068	1.54889
3000002C10Rik	0.742483	0.352419	2.00955	2.74469	0.601418		0	1.64544	0	0	1.81022	0.497451	0	1.18034	1.54889
3010003L21Rik	1.01578	0.401776	1.82967	1.93971	0.746847		0	3.29089	1.07553	0	0	0.497451	0	1.18034	3.09777
3110001I22Rik	1.12319	-0.101824	1.58384	0.378216	0.984221		0.589534	1.64544	1.07553	1.94955	0	1.49235	1.80742	0	1.54889
3110009E18Rik	0.59645	-0.112838	2.14097	1.42023	0.840671		0.589534	0	2.15105	0	0	0.497451	1.35556	0	0.774443
3110040N11Rik	2.62652	-3.22744	1.36168	3.70191	0.447848		4.12674	1.64544	0	0	0	3.48216	5.42226	3.54102	5.4211
3110045C21Rik	0.0552723	0.580731	3.52406	0.196393	0.995483		0	0	0	0	0	0.497451	0	0	0
3110053B16Rik	0.0552723	0.580731	3.52406	0.196393	0.995483		0	0	0	0	0	0.497451	0	0	0
3110056K07Rik	1.7215	-0.578484	1.38113	1.51437	0.824093		1.7686	4.93633	0	0	1.81022	1.9898	2.25927	1.18034	1.54889
3110070M22Rik	0.0860492	0.554858	3.52792	0.354142	0.986056		0	0	0	0	0	0	0	0	0.774443
3110082I17Rik	1.42498	-0.135479	1.38662	1.17231	0.882635		0.589534	1.64544	2.15105	0	1.81022	0.994902	1.35556	1.18034	3.09777
3110083C13Rik	0.160751	-0.317221	3.49708	0.201873	0.995236		0	0	0	0	0	0.994902	0.451855	0	0
3300005D01Rik	0.2919	-0.902887	3.22358	0.223904	0.994182		0	0	0	0	0	0.994902	0.451855	1.18034	0
3830403N18Rik	0.105478	-0.0379606	3.5087	0.0949498	0.998908		0	0	0	0	0	0.497451	0.451855	0	0
3830406C13Rik	7.72702	0.147145	0.620741	1.12587	0.890146		8.84301	6.58177	11.8308	5.84864	7.2409	4.97451	8.58524	9.44273	6.19554
3830408C21Rik	0.131149	0.524317	3.53196	0.570973	0.966234		0	0	0	0	0	0	0	1.18034	0
4632404H12Rik	0.582087	-0.0485643	2.19228	0.947228	0.91769		0.589534	0	2.15105	0	0	0.497451	0.451855	0	1.54889
4632415L05Rik	1.94937	0.301286	1.34883	0.495418	0.973945		1.7686	6.58177	1.07553	1.94955	0	0	2.25927	2.36068	1.54889
4632427E13Rik	0.529701	1.07723	2.40933	1.20314	0.877582		0	1.64544	1.07553	0	0	0.497451	0	0	1.54889
4732414G09Rik	0.0552723	0.580731	3.52406	0.196393	0.995483		0	0	0	0	0	0.497451	0	0	0
4732416N19Rik	0.332326	1.20294	3.12941	0.483447	0.975092		0.589534	0	0	1.94955	0	0	0.451855	0	0
4732440D04Rik	0.251342	1.23219	3.5335	0.483204	0.975115		0	0	0	0	1.81022	0	0.451855	0	0
4732471J01Rik	0.0552723	0.580731	3.52406	0.196393	0.995483		0	0	0	0	0	0.497451	0	0	0
4732491K20Rik	0.26664	1.90719	3.52782	0.343023	0.98687		0.589534	0	0	0	1.81022	0	0	0	0
4732496C06Rik	0.578395	-0.844126	2.31543	0.441301	0.978958		0	0	1.07553	0	0	0.994902	0	2.36068	0.774443
4833403J16Rik	0.30233	2.5431	3.49685	0.386355	0.983579		0	1.64544	1.07553	0	0	0	0	0	0
4833407H14Rik	0.332285	1.33385	3.3797	1.00214	0.909472		0	0	0	0	1.81022	0	0	1.18034	0
4833408A19Rik	0.471132	0.834541	2.68117	1.64696	0.800328		0	3.29089	0	0	0	0.497451	0.451855	0	0
4833417C18Rik	0.591383	0.305962	2.28158	2.17061	0.704413		0.589534	0	2.15105	0	0	0	1.80742	0	0.774443
4833418N02Rik	0.266822	1.20199	3.5291	0.589439	0.96423		0	0	0	1.94955	0	0	0.451855	0	0
4833419F23Rik	0.0655038	1.23144	3.53373	0.139814	0.997667		0.589534	0	0	0	0	0	0	0	0
4833420G17Rik	8.18688	1.52479	0.616081	3.10099	0.541069		6.48487	16.4544	10.7553	9.74773	12.6716	7.46177	5.42226	2.36068	2.32333
4833422C13Rik	0.0552723	0.580731	3.52406	0.196393	0.995483		0	0	0	0	0	0.497451	0	0	0
4833438C02Rik	1.97703	-0.729522	1.24428	2.16643	0.705181		2.35814	1.64544	2.15105	1.94955	0	2.48726	4.06669	2.36068	0.774443
4833439L19Rik	9.27407	-0.845395	0.599014	0.747989	0.945282		7.66394	9.87266	4.30211	5.84864	7.2409	8.95412	13.1038	9.44273	17.0377
4833445I07Rik	0.629491	2.20306	2.24735	2.06855	0.723152		0	1.64544	1.07553	1.94955	0	0.994902	0	0	0
4921501I09Rik	0.182827	1.93753	3.53185	0.418463	0.980938		0	1.64544	0	0	0	0	0	0	0
4921524J17Rik	2.35881	-0.0270979	1.08502	0.260486	0.99222		1.7686	3.29089	1.07553	3.89909	1.81022	1.9898	2.71113	2.36068	2.32333
4921531C22Rik	1.1075	2.30147	1.7192	2.57469	0.631313		0.589534	1.64544	1.07553	0	5.43067	0	0.451855	0	0.774443
4930402H24Rik	0.887443	-1.57952	1.80807	0.852323	0.931299		0.589534	1.64544	0	0	0	1.9898	1.80742	1.18034	0.774443
4930404N11Rik	0.357938	0.597933	3.02383	0.835895	0.933572		0	0	0	1.94955	0	0.497451	0	0	0.774443
4930405A21Rik	0.0860492	0.554858	3.52792	0.354142	0.986056		0	0	0	0	0	0	0	0	0.774443
4930413G21Rik	0.216616	1.88136	3.52396	0.630713	0.95959		0	0	0	1.94955	0	0	0	0	0
4930417H01Rik	0.0502061	0.556333	3.52771	0.113493	0.99845		0	0	0	0	0	0	0.451855	0	0
4930423D22Rik	0.182827	1.93753	3.53185	0.418463	0.980938		0	1.64544	0	0	0	0	0	0	0
4930426I24Rik	0.0502061	0.556333	3.52771	0.113493	0.99845		0	0	0	0	0	0	0.451855	0	0
4930426L09Rik	0.0860492	0.554858	3.52792	0.354142	0.986056		0	0	0	0	0	0	0	0	0.774443
4930430E12Rik	0.201136	1.90711	3.52782	0.53154	0.970359		0	0	0	0	1.81022	0	0	0	0
4930430F08Rik	0.568121	-0.287094	2.21732	1.19842	0.878358		1.17907	0	1.07553	0	0	0	0.90371	1.18034	0.774443
4930431P19Rik	0.0552723	0.580731	3.52406	0.196393	0.995483		0	0	0	0	0	0.497451	0	0	0
4930438A08Rik	0.216023	-0.489508	3.49187	0.301477	0.989719		0	0	0	0	0	1.49235	0.451855	0	0
4930447K03Rik	0.0552723	0.580731	3.52406	0.196393	0.995483		0	0	0	0	0	0.497451	0	0	0
4930451G09Rik	0.0655038	1.23144	3.53373	0.139814	0.997667		0.589534	0	0	0	0	0	0	0	0
4930453N24Rik	5.33226	-0.679118	0.781334	0.812945	0.936704		7.07441	6.58177	3.22658	1.94955	3.62045	4.47706	5.42226	9.44273	6.19554
4930455G09Rik	0.876502	-0.46861	1.82433	2.28055	0.684313		0.589534	0	0	0	3.62045	0.497451	0.451855	1.18034	1.54889
4930466K18Rik	0.185007	1.90867	3.52802	0.112863	0.998466		0.589534	0	1.07553	0	0	0	0	0	0
4930481A15Rik	0.793978	-0.414769	2.11912	0.883816	0.926871		1.17907	0	2.15105	0	0	1.49235	0	0	2.32333
4930486L24Rik	0.297006	-1.15588	3.18342	0.118011	0.998326		0	0	0	0	0	0.994902	0.90371	0	0.774443
4930503L19Rik	2.23936	-0.816201	1.30484	4.58972	0.332042		0	0	0	1.94955	9.05112	2.98471	2.25927	2.36068	1.54889
4930506C21Rik	0.0655038	1.23144	3.53373	0.139814	0.997667		0.589534	0	0	0	0	0	0	0	0
4930509G22Rik	0.0655038	1.23144	3.53373	0.139814	0.997667		0.589534	0	0	0	0	0	0	0	0
4930511M06Rik	0.0502061	0.556333	3.52771	0.113493	0.99845		0	0	0	0	0	0	0.451855	0	0
4930512J16Rik	0.2919	-0.902887	3.22358	0.223904	0.994182		0	0	0	0	0	0.994902	0.451855	1.18034	0
4930513N10Rik	0.30233	2.5431	3.49685	0.386355	0.983579		0	1.64544	1.07553	0	0	0	0	0	0
4930519L02Rik	0.0502061	0.556333	3.52771	0.113493	0.99845		0	0	0	0	0	0	0.451855	0	0
4930519P11Rik	0.0502061	0.556333	3.52771	0.113493	0.99845		0	0	0	0	0	0	0.451855	0	0
4930522L14Rik	2.29554	-1.69324	1.27355	1.91069	0.752181		2.35814	3.29089	0	0	1.81022	3.48216	2.71113	2.36068	4.64666
4930523C07Rik	1.66789	-1.20447	1.37522	2.44508	0.654496		1.17907	3.29089	1.07553	0	0	4.47706	2.25927	1.18034	1.54889
4930526L06Rik	0.0655038	1.23144	3.53373	0.139814	0.997667		0.589534	0	0	0	0	0	0	0	0
4930533N22Rik	0.2468	-0.886836	3.44615	0.118537	0.998312		0	0	0	0	0	0.994902	0.451855	0	0.774443
4930539J05Rik	0.131149	0.524317	3.53196	0.570973	0.966234		0	0	0	0	0	0	0	1.18034	0
4930549G23Rik	0.131149	0.524317	3.53196	0.570973	0.966234		0	0	0	0	0	0	0	1.18034	0
4930555A03Rik	0.182827	1.93753	3.53185	0.418463	0.980938		0	1.64544	0	0	0	0	0	0	0
4930570N18Rik	0.100412	0.255999	3.51218	0.294189	0.990186		0	0	0	0	0	0	0.90371	0	0
4930577N17Rik	0.691824	-0.783104	2.08198	0.913305	0.922644		1.17907	1.64544	0	0	0	0.497451	1.35556	0	1.54889
4930579G24Rik	1.41958	-1.24417	1.52011	1.26447	0.867375		2.94767	0	1.07553	1.94955	0	1.49235	1.80742	1.18034	2.32333
4930579K19Rik	0.131149	0.524317	3.53196	0.570973	0.966234		0	0	0	0	0	0	0	1.18034	0
4930581F22Rik	1.04368	-0.974119	1.72874	1.06761	0.899376		0	1.64544	0	0	1.81022	0.994902	1.80742	2.36068	0.774443
4930599N23Rik	0.0552723	0.580731	3.52406	0.196393	0.995483		0	0	0	0	0	0.497451	0	0	0
4931406C07Rik	4.40214	-1.70679	0.949449	2.31547	0.677954		3.5372	0	1.07553	7.79819	1.81022	5.47196	5.87411	7.08205	6.96999
4931414P19Rik	0.514263	-1.2352	2.42404	0.826165	0.934906		0.589534	0	0	0	0	0	0.90371	2.36068	0.774443
4931415C17Rik	0.216616	1.88136	3.52396	0.630713	0.95959		0	0	0	1.94955	0	0	0	0	0
4931428F04Rik	0.337833	-0.0422099	3.08428	1.02883	0.905393		1.7686	0	0	0	0	0.497451	0	0	0.774443
4931431B13Rik	0.0502061	0.556333	3.52771	0.113493	0.99845		0	0	0	0	0	0	0.451855	0	0
4931440P22Rik	0.525285	1.25281	2.3918	2.1983	0.699341		0	1.64544	0	0	1.81022	0.497451	0	0	0.774443
4932422M17Rik	0.0860492	0.554858	3.52792	0.354142	0.986056		0	0	0	0	0	0	0	0	0.774443
4932438A13Rik	4.44606	-0.723826	0.926299	3.32957	0.50426		2.35814	11.5181	0	1.94955	3.62045	2.98471	3.16298	5.90171	8.51887
4932441J04Rik	0.0860492	0.554858	3.52792	0.354142	0.986056		0	0	0	0	0	0	0	0	0.774443
4932443L11Rik	0.119503	1.90859	3.52802	0.242736	0.993205		0	0	1.07553	0	0	0	0	0	0
4933404O12Rik	1.19703	1.77038	1.60192	1.88441	0.757008		1.17907	1.64544	2.15105	3.89909	0	0.994902	0.90371	0	0
4933407K13Rik	0.11571	0.556423	3.52771	0.2211	0.994322		0.589534	0	0	0	0	0	0.451855	0	0
4933412E12Rik	1.00356	-0.335549	1.73343	0.380998	0.984003		1.7686	1.64544	0	0	1.81022	0.497451	1.35556	1.18034	0.774443
4933421O10Rik	1.23635	-1.25232	1.66637	2.41792	0.659392		2.35814	0	2.15105	0	0	2.48726	1.80742	0	2.32333
4933424M12Rik	1.16793	-1.32075	1.60273	1.79406	0.773569		0	0	1.07553	1.94955	0	0.994902	1.80742	2.36068	2.32333
4933427D14Rik	0.734531	0.600208	1.95694	1.64126	0.801358		1.17907	0	1.07553	1.94955	0	0	0.451855	1.18034	0.774443
4933427J07Rik	0.131149	0.524317	3.53196	0.570973	0.966234		0	0	0	0	0	0	0	1.18034	0
4933431K14Rik	0.91985	1.30172	1.96699	3.82828	0.429744		0	4.93633	1.07553	0	0	1.49235	0	0	0.774443
4933434E20Rik	14.0139	0.627705	0.471536	2.322	0.676766		12.3802	24.6816	9.67974	23.3946	12.6716	10.9439	8.58524	10.6231	13.1655
4933439C10Rik	0.33046	0.0436885	3.04704	0.803181	0.938021		0	0	1.07553	0	0	0.994902	0.90371	0	0
4933440N22Rik	0.105478	-0.0379606	3.5087	0.0949498	0.998908		0	0	0	0	0	0.497451	0.451855	0	0
5031425E22Rik	1.4515	-3.4763	1.62735	0.159224	0.996994		0	0	0	0	0	2.48726	3.16298	3.54102	3.87221
5031434O11Rik	0.58227	2.84808	2.67843	1.37336	0.848812		0	3.29089	0	1.94955	0	0	0	0	0
5033406O09Rik	1.17843	1.74759	1.56565	2.07461	0.722038		0	1.64544	1.07553	3.89909	1.81022	0.497451	0.90371	0	0.774443
5033430I15Rik	0.0552723	0.580731	3.52406	0.196393	0.995483		0	0	0	0	0	0.497451	0	0	0
5330438D12Rik	0.724158	0.633505	2.01292	0.35684	0.985856		1.7686	0	1.07553	1.94955	0	0.497451	0.451855	0	0.774443
5330439K02Rik	0.0655038	1.23144	3.53373	0.139814	0.997667		0.589534	0	0	0	0	0	0	0	0
5430403G16Rik	0.441415	1.89621	2.63476	0.197471	0.995435		0.589534	0	1.07553	0	1.81022	0.497451	0	0	0
5430405H02Rik	1.17718	0.334558	1.68822	1.12839	0.889742		1.7686	0	1.07553	0	3.62045	0.994902	0	2.36068	0.774443
5430414B19Rik	0.0502061	0.556333	3.52771	0.113493	0.99845		0	0	0	0	0	0	0.451855	0	0
5430416N02Rik	0.654944	-1.20139	2.19041	0.614683	0.961418		0	0	0	1.94955	0	1.49235	0.90371	0	1.54889
5430437J10Rik	0.65846	0.932263	2.08303	1.82292	0.768286		0	1.64544	2.15105	0	0	0.497451	0.451855	1.18034	0
5530400K19Rik	0.0655038	1.23144	3.53373	0.139814	0.997667		0.589534	0	0	0	0	0	0	0	0
5530601H04Rik	1.86037	-1.07146	1.35611	2.48848	0.6467		4.12674	3.29089	1.07553	0	0	2.48726	2.25927	1.18034	2.32333
5730405O15Rik	0.131149	0.524317	3.53196	0.570973	0.966234		0	0	0	0	0	0	0	1.18034	0
5730409E04Rik	1.18373	-0.361606	1.51727	2.33343	0.674689		0	1.64544	1.07553	1.94955	0	1.49235	1.35556	2.36068	0.774443
5730455P16Rik	0.981245	-0.810398	1.86688	1.61964	0.805258		0.589534	3.29089	0	0	0	0.497451	1.35556	0	3.09777
5730480H06Rik	1.72487	0.491296	1.37204	1.903	0.753595		1.7686	0	5.37763	0	3.62045	0.994902	1.80742	1.18034	0.774443
5830408C22Rik	0.846394	0.969668	1.86939	2.54491	0.636613		0	3.29089	2.15105	0	0	0.497451	0.90371	0	0.774443
5830415G21Rik	0.0552723	0.580731	3.52406	0.196393	0.995483		0	0	0	0	0	0.497451	0	0	0
5830417I10Rik	0.0502061	0.556333	3.52771	0.113493	0.99845		0	0	0	0	0	0	0.451855	0	0
5830428M24Rik	0.2919	-0.902887	3.22358	0.223904	0.994182		0	0	0	0	0	0.994902	0.451855	1.18034	0
5830432E09Rik	1.01512	-0.886686	1.66052	0.814146	0.936542		0.589534	0	1.07553	0	1.81022	0.994902	2.71113	1.18034	0.774443
5830444B04Rik	0.357938	0.597933	3.02383	0.835895	0.933572		0	0	0	1.94955	0	0.497451	0	0	0.774443
5830448L01Rik	0.675071	0.377802	1.98071	0.854637	0.930977		1.17907	1.64544	1.07553	0	0	0.497451	0.90371	0	0.774443
5830454E08Rik	0.181214	0.556459	3.52771	0.457007	0.977549		1.17907	0	0	0	0	0	0.451855	0	0
5930420M18Rik	0.216616	1.88136	3.52396	0.630713	0.95959		0	0	0	1.94955	0	0	0	0	0
6030442K20Rik	0.0502061	0.556333	3.52771	0.113493	0.99845		0	0	0	0	0	0	0.451855	0	0
6030443J06Rik	0.0502061	0.556333	3.52771	0.113493	0.99845		0	0	0	0	0	0	0.451855	0	0
6030458C11Rik	3.15541	0.948535	0.974275	1.82191	0.768471		2.94767	3.29089	7.52868	3.89909	1.81022	3.97961	1.80742	2.36068	0.774443
6230400D17Rik	0.11571	0.556423	3.52771	0.2211	0.994322		0.589534	0	0	0	0	0	0.451855	0	0
6330403L08Rik	0.578733	-1.77874	2.42992	0.462053	0.977088		0	0	0	0	0	1.49235	1.35556	2.36068	0
6330408M09Rik	0.169709	1.23178	3.49425	0.598897	0.963186		0	0	1.07553	0	0	0	0.451855	0	0
6330410L21Rik	0.0502061	0.556333	3.52771	0.113493	0.99845		0	0	0	0	0	0	0.451855	0	0
6330418K02Rik	2.27418	1.54728	1.20008	4.05528	0.398576		4.71627	3.29089	4.30211	3.89909	0	0.994902	0.90371	2.36068	0
6330537M06Rik	0.638785	2.28724	2.42064	1.75869	0.780031		0	0	1.07553	3.89909	0	0	0	0	0.774443
6430548M08Rik	0.867138	-1.05316	1.93147	1.12539	0.890224		0.589534	1.64544	0	0	0	0.497451	2.71113	2.36068	0
6430571L13Rik	0.182827	1.93753	3.53185	0.418463	0.980938		0	1.64544	0	0	0	0	0	0	0
6430573P05Rik	0.0860492	0.554858	3.52792	0.354142	0.986056		0	0	0	0	0	0	0	0	0.774443
6530402F18Rik	1.95929	-0.134413	1.34187	3.89576	0.420297		1.7686	1.64544	0	0	7.2409	1.49235	3.16298	0	2.32333
6530409C15Rik	0.52336	-1.32836	2.41353	1.07832	0.897697		1.17907	0	0	0	0	0.497451	2.25927	0	0.774443
6720427I07Rik	0.286692	-0.335718	3.27004	0.578021	0.965474		1.17907	0	0	0	0	0.497451	0.90371	0	0
6720489N17Rik	1.1419	1.49207	1.59539	4.0845	0.39469		0	1.64544	2.15105	3.89909	0	0.497451	0.90371	1.18034	0
6820431F20Rik	10.7612	-1.436	0.582311	1.81535	0.769673		11.7907	8.22721	5.37763	5.84864	3.62045	15.421	15.3631	14.1641	17.0377
8030456M14Rik	0.0502061	0.556333	3.52771	0.113493	0.99845		0	0	0	0	0	0	0.451855	0	0
8030462N17Rik	1.27855	-1.98332	1.6407	1.38781	0.846311		2.35814	0	0	0	1.81022	1.49235	2.71113	2.36068	0.774443
8430422M14Rik	0.136255	-0.0559318	3.51215	0.202822	0.995193		0	0	0	0	0	0	0.451855	0	0.774443
8430429K09Rik	0.774364	0.330437	1.93623	0.561794	0.967213		1.7686	0	1.07553	1.94955	0	0.497451	0.90371	0	0.774443
9030025P20Rik	2.1995	-0.425056	1.17431	1.77767	0.776566		2.94767	1.64544	2.15105	0	3.62045	1.9898	3.16298	1.18034	3.09777
9030407P20Rik	0.392665	0.993834	2.91914	0.907287	0.923513		0.589534	0	0	1.94955	0	0.994902	0	0	0
9030619P08Rik	0.995413	-0.528637	1.72038	0.331392	0.987699		1.17907	0	1.07553	0	1.81022	2.48726	0.451855	1.18034	0.774443
9130008F23Rik	0.0502061	0.556333	3.52771	0.113493	0.99845		0	0	0	0	0	0	0.451855	0	0
9130019O22Rik	1.60397	-0.23818	1.47622	3.18104	0.527999		4.71627	0	1.07553	0	3.62045	1.9898	2.25927	0	0.774443
9130023H24Rik	0.879842	-0.180853	1.77732	1.9793	0.739565		1.17907	0	1.07553	0	1.81022	0.497451	1.80742	0	1.54889
9130213A22Rik	0.131149	0.524317	3.53196	0.570973	0.966234		0	0	0	0	0	0	0	1.18034	0
9130221H12Rik	0.967659	-0.115012	1.98415	2.15335	0.707578		1.7686	0	0	3.89909	0	1.49235	0	0	1.54889
9130230N09Rik	0.238099	1.24142	3.49436	0.85675	0.930682		0	1.64544	0	0	0	0.497451	0	0	0
9130401M01Rik	6.96225	0.403037	0.658525	2.09739	0.717851		9.43254	4.93633	8.60421	11.6973	5.43067	4.97451	8.58524	5.90171	3.09777
9130604C24Rik	0.176048	0.274866	3.51217	0.517005	0.971825		0.589534	0	0	0	0	0.994902	0	0	0
9230111E07Rik	0.119503	1.90859	3.52802	0.242736	0.993205		0	0	1.07553	0	0	0	0	0	0
9230112E08Rik	1.25854	1.80889	1.59111	1.00725	0.908695		1.17907	1.64544	2.15105	3.89909	0	0.497451	0	1.18034	0.774443
9230116N13Rik	0.169709	1.23178	3.49425	0.598897	0.963186		0	0	1.07553	0	0	0	0.451855	0	0
9330020H09Rik	0.4684	1.23078	2.75043	1.01391	0.90768		1.7686	0	0	1.94955	0	0.497451	0	0	0
9330104G04Rik	0.0552723	0.580731	3.52406	0.196393	0.995483		0	0	0	0	0	0.497451	0	0	0
9330111N05Rik	0.0860492	0.554858	3.52792	0.354142	0.986056		0	0	0	0	0	0	0	0	0.774443
9330136K24Rik	0.272511	-0.624009	3.48767	0.343864	0.986809		0	0	0	0	0	0	0.90371	0	1.54889
9330151L19Rik	0.944242	-0.329041	1.73605	1.4973	0.827119		0.589534	1.64544	0	0	1.81022	0.497451	0.451855	1.18034	2.32333
9330159M07Rik	0.676811	1.23274	2.08678	1.31942	0.858073		0.589534	0	2.15105	1.94955	0	0.497451	0.90371	0	0
9330160F10Rik	0.226255	-0.317133	3.49708	0.309475	0.989194		0.589534	0	0	0	0	0.994902	0.451855	0	0
9330161L09Rik	0.0655038	1.23144	3.53373	0.139814	0.997667		0.589534	0	0	0	0	0	0	0	0
9330175E14Rik	0.530906	-0.0772079	2.37929	1.33705	0.855059		0	0	2.15105	0	0	0.994902	0.451855	1.18034	0
9430002A10Rik	0.169709	1.23178	3.49425	0.598897	0.963186		0	0	1.07553	0	0	0	0.451855	0	0
9430015G10Rik	1.26974	-2.64053	1.67973	4.10946	0.391394		4.12674	0	0	0	0	1.9898	1.80742	1.18034	2.32333
9430037G07Rik	0.0502061	0.556333	3.52771	0.113493	0.99845		0	0	0	0	0	0	0.451855	0	0
9430037O13Rik	0.11571	0.556423	3.52771	0.2211	0.994322		0.589534	0	0	0	0	0	0.451855	0	0
9430038I01Rik	1.75074	-1.21408	1.37059	1.45453	0.834665		1.17907	3.29089	0	0	1.81022	2.48726	2.71113	1.18034	3.09777
9430065F17Rik	0.181355	-0.0793692	3.51575	0.342255	0.986926		0	0	0	0	0	0	0.451855	1.18034	0
9430081H08Rik	0.322677	-1.21823	2.86188	0.108954	0.998569		0	0	0	0	0	0.497451	0.451855	1.18034	0.774443
9430091E24Rik	0.196653	0.524406	3.53196	0.678578	0.953944		0.589534	0	0	0	0	0	0	1.18034	0
9530018F02Rik	0.151553	0.554948	3.52792	0.461748	0.977116		0.589534	0	0	0	0	0	0	0	0.774443
9530056K15Rik	0.0860492	0.554858	3.52792	0.354142	0.986056		0	0	0	0	0	0	0	0	0.774443
9530068E07Rik	25.6787	0.831749	0.350645	0.351678	0.986238		27.7081	36.1997	35.4924	27.2937	30.7738	16.4159	18.9779	18.8855	19.3611
9530085L11Rik	0.400025	0.355652	2.89698	0.863121	0.929791		0	1.64544	0	0	0	0	0	1.18034	0.774443
9630013D21Rik	0.0552723	0.580731	3.52406	0.196393	0.995483		0	0	0	0	0	0.497451	0	0	0
9630014M24Rik	0.0502061	0.556333	3.52771	0.113493	0.99845		0	0	0	0	0	0	0.451855	0	0
9630028I04Rik	0.182827	1.93753	3.53185	0.418463	0.980938		0	1.64544	0	0	0	0	0	0	0
9930004E17Rik	0.0655038	1.23144	3.53373	0.139814	0.997667		0.589534	0	0	0	0	0	0	0	0
9930012K11Rik	0.422848	-1.19023	2.59823	0.572508	0.966069		0.589534	0	0	0	0	1.9898	0.451855	0	0.774443
9930014A18Rik	0.235213	1.23187	3.49425	0.469015	0.976446		0.589534	0	1.07553	0	0	0	0.451855	0	0
9930017N22Rik	0.182827	1.93753	3.53185	0.418463	0.980938		0	1.64544	0	0	0	0	0	0	0
9930021J03Rik	3.07247	-0.625401	1.03857	1.20761	0.876843		3.5372	4.93633	0	3.89909	1.81022	2.48726	3.16298	4.72137	3.09777
9930022D16Rik	0.131149	0.524317	3.53196	0.570973	0.966234		0	0	0	0	0	0	0	1.18034	0
9930104L06Rik	1.00798	-0.597501	1.69205	0.459577	0.977315		1.7686	1.64544	1.07553	0	0	0.497451	1.35556	1.18034	1.54889
9930111J21Rik1	0.331973	-0.617983	3.34565	0.450011	0.978181		0	0	0	0	0	0	1.80742	1.18034	0
9930111J21Rik2	1.21914	-0.0545006	1.72364	4.05174	0.399048		1.17907	0	0	5.84864	0	1.9898	0	1.18034	0.774443
9930120I10Rik	0.0860492	0.554858	3.52792	0.354142	0.986056		0	0	0	0	0	0	0	0	0.774443
A130006I12Rik	0.105478	-0.0379606	3.5087	0.0949498	0.998908		0	0	0	0	0	0.497451	0.451855	0	0
A130010J15Rik	1.51449	-0.966773	1.42468	1.54753	0.81819		2.35814	1.64544	2.15105	0	0	2.48726	2.25927	1.18034	1.54889
A130014A01Rik	0.230048	0.968273	3.50129	0.455474	0.977688		0	0	1.07553	0	0	0.994902	0	0	0
A130071D04Rik	0.182827	1.93753	3.53185	0.418463	0.980938		0	1.64544	0	0	0	0	0	0	0
A130077B15Rik	0.291601	1.1216	3.49302	0.672797	0.954641		0	0	1.07553	0	0	0	0	0	1.54889
A230020J21Rik	0.0860492	0.554858	3.52792	0.354142	0.986056		0	0	0	0	0	0	0	0	0.774443
A230028O05Rik	0.11571	0.556423	3.52771	0.2211	0.994322		0.589534	0	0	0	0	0	0.451855	0	0
A230056P14Rik	0.169709	1.23178	3.49425	0.598897	0.963186		0	0	1.07553	0	0	0	0.451855	0	0
A230059L01Rik	10.988	1.57364	0.546731	1.71473	0.788041		20.6337	14.809	19.3595	15.5964	9.05112	4.47706	6.77782	3.54102	4.64666
A230060F14Rik	0.0552723	0.580731	3.52406	0.196393	0.995483		0	0	0	0	0	0.497451	0	0	0
A230072C01Rik	0.0860492	0.554858	3.52792	0.354142	0.986056		0	0	0	0	0	0	0	0	0.774443
A330009N23Rik	1.54328	0.403222	1.37001	4.13081	0.388592		0	0	2.15105	1.94955	3.62045	0.497451	1.35556	3.54102	0.774443
A330035P11Rik	0.26664	1.90719	3.52782	0.343023	0.98687		0.589534	0	0	0	1.81022	0	0	0	0
A3galt2	0.0860492	0.554858	3.52792	0.354142	0.986056		0	0	0	0	0	0	0	0	0.774443
A430005L14Rik	13.7766	1.89445	0.489697	0.776114	0.941621		17.686	18.0999	25.8126	21.445	18.1022	6.46686	5.42226	7.08205	3.87221
A430018G15Rik	0.558241	1.60507	2.37283	1.93525	0.747667		0.589534	0	1.07553	0	1.81022	0	0	0	1.54889
A430027C01Rik	0.131149	0.524317	3.53196	0.570973	0.966234		0	0	0	0	0	0	0	1.18034	0
A430028G04Rik	0.119503	1.90859	3.52802	0.242736	0.993205		0	0	1.07553	0	0	0	0	0	0
A430033K04Rik	0.393287	-1.18377	2.66021	0.424964	0.980382		0.589534	0	0	0	0	0.497451	0.90371	0	1.54889
A430034D21Rik	0.0502061	0.556333	3.52771	0.113493	0.99845		0	0	0	0	0	0	0.451855	0	0
A430035B10Rik	0.221089	0.0638925	3.49401	0.659751	0.956198		0	0	0	0	0	1.9898	0	0	0
A430057M04Rik	0.0552723	0.580731	3.52406	0.196393	0.995483		0	0	0	0	0	0.497451	0	0	0
A430093F15Rik	0.119503	1.90859	3.52802	0.242736	0.993205		0	0	1.07553	0	0	0	0	0	0
A430103D13Rik	0.983695	0.941388	1.78286	2.49112	0.646227		1.17907	1.64544	0	3.89909	0	0.497451	0.451855	1.18034	0
A530017D24Rik	0.668692	1.62257	2.1245	0.997663	0.91015		0.589534	1.64544	2.15105	0	0	0	0.451855	1.18034	0
A530030E21Rik	0.201136	1.90711	3.52782	0.53154	0.970359		0	0	0	0	1.81022	0	0	0	0
A530032D15Rik	1.20278	-1.55375	1.67634	2.63005	0.621508		4.12674	0	1.07553	0	0	1.9898	0.90371	1.18034	1.54889
A530040E14Rik	1.97282	2.51377	1.35224	2.44106	0.65522		1.7686	1.64544	3.22658	3.89909	3.62045	0.497451	0	0	3.09777
A530041M06Rik	0.0502061	0.556333	3.52771	0.113493	0.99845		0	0	0	0	0	0	0.451855	0	0
A530064D06Rik	2.44024	1.92779	1.20218	1.68075	0.794211		1.17907	0	4.30211	3.89909	9.05112	0.994902	1.35556	1.18034	0
A530088E08Rik	0.0655038	1.23144	3.53373	0.139814	0.997667		0.589534	0	0	0	0	0	0	0	0
A630001G21Rik	3.37777	-0.979698	0.959594	0.169417	0.996609		2.35814	1.64544	2.15105	1.94955	3.62045	6.46686	3.61484	4.72137	3.87221
A630052C17Rik	0.287185	1.23119	3.49425	1.12835	0.889748		0	0	0	0	1.81022	0	0	0	0.774443
A630072M18Rik	2.38231	0.95272	1.14619	1.92841	0.748924		1.17907	0	4.30211	7.79819	1.81022	1.9898	0.451855	2.36068	1.54889
A630089N07Rik	0.35852	-0.924445	2.97201	0.45975	0.977299		0	0	0	0	0	0.497451	0	1.18034	1.54889
A730011C13Rik	0.0552723	0.580731	3.52406	0.196393	0.995483		0	0	0	0	0	0.497451	0	0	0
A730020E08Rik	0.0655038	1.23144	3.53373	0.139814	0.997667		0.589534	0	0	0	0	0	0	0	0
A730061H03Rik	0.131149	0.524317	3.53196	0.570973	0.966234		0	0	0	0	0	0	0	1.18034	0
A730063M14Rik	1.42354	3.09878	1.5658	1.87514	0.75871		1.17907	3.29089	3.22658	1.94955	1.81022	0	1.35556	0	0
A830008E24Rik	0.320639	2.52046	3.4101	0.49945	0.973555		0	0	1.07553	0	1.81022	0	0	0	0
A930001C03Rik	0.0552723	0.580731	3.52406	0.196393	0.995483		0	0	0	0	0	0.497451	0	0	0
A930005H10Rik	1.0892	-1.78059	1.70845	1.16488	0.883846		1.17907	0	0	1.94955	0	1.49235	0.90371	1.18034	3.09777
A930006K02Rik	1.92994	-0.670217	1.34186	4.86725	0.301192		3.5372	1.64544	3.22658	0	0	2.98471	3.61484	2.36068	0
A930007A09Rik	0.191528	-0.625247	3.48578	0.0804802	0.999212		0	0	0	0	0	0.497451	0.451855	0	0.774443
A930007I19Rik	0.235213	1.23187	3.49425	0.469015	0.976446		0.589534	0	1.07553	0	0	0	0.451855	0	0
A930012O16Rik	0.388715	1.10065	3.15339	1.28392	0.864098		0	0	0	1.94955	0	0	0	0	1.54889
A930024E05Rik	0.131149	0.524317	3.53196	0.570973	0.966234		0	0	0	0	0	0	0	1.18034	0
A930033H14Rik	0.0502061	0.556333	3.52771	0.113493	0.99845		0	0	0	0	0	0	0.451855	0	0
A930035D04Rik	0.0552723	0.580731	3.52406	0.196393	0.995483		0	0	0	0	0	0.497451	0	0	0
A930041C12Rik	0.0502061	0.556333	3.52771	0.113493	0.99845		0	0	0	0	0	0	0.451855	0	0
AA388235	0.316156	1.33084	3.1891	0.604412	0.962572		0.589534	0	1.07553	0	0	0	0	1.18034	0
AA465934	0.816787	-0.613947	1.97226	2.18326	0.702095		1.7686	0	0	1.94955	0	0	0.90371	1.18034	1.54889
AA467197	2.02891	0.388593	1.1857	0.965716	0.914949		1.17907	1.64544	1.07553	5.84864	1.81022	2.48726	2.25927	1.18034	0.774443
AA474408	0.216616	1.88136	3.52396	0.630713	0.95959		0	0	0	1.94955	0	0	0	0	0
AA914427	0.370845	1.8912	2.95127	0.962873	0.915372		0	0	1.07553	0	1.81022	0	0.451855	0	0
AA986860	0.0502061	0.556333	3.52771	0.113493	0.99845		0	0	0	0	0	0	0.451855	0	0
Aaas	4.84214	-1.21579	0.867403	1.89554	0.754965		4.12674	0	3.22658	1.94955	7.2409	8.95412	4.06669	4.72137	9.29332
Aacs	6.05596	-0.643603	0.748395	2.24912	0.690048		8.84301	6.58177	2.15105	5.84864	3.62045	10.4465	7.68153	2.36068	6.96999
Aagab	9.96908	-1.3437	0.601565	1.43377	0.838306		9.43254	3.29089	5.37763	3.89909	10.8613	14.4261	13.5556	14.1641	14.7144
Aak1	1.97741	-0.434582	1.26415	1.10491	0.893493		2.94767	3.29089	0	1.94955	1.81022	2.48726	1.80742	1.18034	2.32333
Aamdc	3.9209	1.83398	0.899885	1.3695	0.849478		4.12674	8.22721	3.22658	5.84864	7.2409	2.48726	1.80742	0	2.32333
Aamp	29.1675	1.25455	0.330473	3.92226	0.416629		23.5814	37.8452	47.3232	42.89	39.8249	13.9286	20.7853	20.0658	16.2633
Aar2	10.9865	1.67965	0.571038	2.30362	0.680111		11.2011	8.22721	21.5105	17.5459	18.1022	4.47706	1.80742	8.26239	7.74443
Aars	18.0697	-0.0202999	0.413418	0.160162	0.99696		16.507	16.4544	18.2839	21.445	16.292	20.3955	15.8149	16.5248	20.91
Aars2	1.20955	-0.829668	1.5718	2.631	0.621342		0.589534	0	0	1.94955	1.81022	0.994902	0.451855	3.54102	1.54889
Aarsd1	3.40309	-0.82861	1.01023	0.742489	0.945988		4.12674	4.93633	0	1.94955	3.62045	3.97961	4.9704	4.72137	2.32333
Aasdh	0.383055	-1.41731	2.86165	0.205575	0.995066		0	0	0	0	0	0.994902	0.90371	0	1.54889
Aasdhppt	5.17475	0.504265	0.747854	0.462415	0.977055		4.71627	8.22721	8.60421	3.89909	3.62045	4.97451	3.16298	4.72137	4.64666
Aatf	7.1758	0.612975	0.635112	0.745553	0.945595		6.48487	9.87266	6.45316	9.74773	9.05112	6.46686	6.32597	7.08205	3.09777
Aatk	0.68012	-2.24094	2.03561	0.300679	0.98977		0.589534	0	0	0	0	0.994902	1.80742	1.18034	1.54889
AB124611	8.67966	-0.748584	0.61518	0.55962	0.967443		5.89534	1.64544	7.52868	9.74773	9.05112	11.9388	10.8445	10.6231	10.8422
Abca1	3.18201	-2.06785	1.15215	6.49089	0.165365		2.35814	0	0	3.89909	1.81022	0.994902	3.16298	9.44273	6.96999
Abca17	0.0502061	0.556333	3.52771	0.113493	0.99845		0	0	0	0	0	0	0.451855	0	0
Abca2	4.5437	-0.813187	0.905356	3.86166	0.425052		2.94767	1.64544	0	11.6973	3.62045	4.97451	5.42226	8.26239	2.32333
Abca3	8.69938	-0.408807	0.618954	1.87349	0.759013		6.48487	4.93633	13.9818	1.94955	10.8613	11.9388	9.0371	8.26239	10.8422
Abca5	0.257031	-0.627359	3.15119	0.224065	0.994174		0.589534	0	0	0	0	0.497451	0.451855	0	0.774443
Abca7	14.0958	1.64695	0.47587	1.21736	0.875232		14.1488	29.618	18.2839	19.4955	18.1022	6.46686	6.32597	5.90171	8.51887
Abca8b	0.131149	0.524317	3.53196	0.570973	0.966234		0	0	0	0	0	0	0	1.18034	0
Abcb10	1.82036	0.802024	1.29693	1.05084	0.901991		2.35814	4.93633	2.15105	1.94955	0	0.497451	1.35556	2.36068	0.774443
Abcb1a	0.46854	-0.048518	2.5217	1.36291	0.850615		0	0	0	0	1.81022	0	0.451855	1.18034	0.774443
Abcb1b	2.12068	-1.47693	1.27532	0.345871	0.986664		1.7686	1.64544	1.07553	1.94955	0	3.97961	3.61484	1.18034	3.87221
Abcb4	0.885049	-0.81042	1.76145	1.43553	0.837997		0	0	1.07553	0	1.81022	0.994902	1.35556	1.18034	1.54889
Abcb6	1.20457	-1.07206	1.58353	0.663791	0.955718		1.7686	1.64544	1.07553	0	0	1.49235	1.35556	1.18034	2.32333
Abcb7	5.98379	0.379022	0.687405	3.58939	0.464418		2.35814	4.93633	4.30211	13.6468	7.2409	3.97961	4.51855	5.90171	6.96999
Abcb8	1.90578	-1.78313	1.39108	2.07912	0.72121		2.94767	0	1.07553	0	1.81022	4.97451	3.61484	1.18034	1.54889
Abcc1	8.33089	-1.25174	0.675928	0.921045	0.921522		6.48487	6.58177	2.15105	11.6973	1.81022	8.45667	14.0075	10.6231	13.1655
Abcc10	0.735027	1.65153	2.05342	1.19617	0.87873		0	1.64544	1.07553	0	1.81022	0	0.90371	1.18034	0
Abcc3	2.45718	-3.26515	1.39954	0.833095	0.933957		0	1.64544	0	0	0	0.994902	5.42226	7.08205	6.96999
Abcc4	2.58173	-1.92241	1.25518	0.558231	0.96759		2.35814	0	2.15105	0	1.81022	4.47706	2.25927	7.08205	3.09777
Abcc5	1.09679	-2.66786	1.76039	2.11565	0.714498		1.7686	0	0	0	0	2.98471	3.16298	1.18034	0.774443
Abcd1	17.6229	0.285153	0.438753	2.96012	0.564521		10.6116	11.5181	27.9637	31.1928	12.6716	18.4057	15.8149	14.1641	16.2633
Abcd2	0.663976	0.883403	2.3979	1.77538	0.776984		2.35814	0	0	0	1.81022	0	1.80742	0	0
Abcd3	2.5578	-0.599383	1.11189	1.49013	0.828388		1.7686	0	5.37763	1.94955	1.81022	1.9898	2.71113	3.54102	3.87221
Abcd4	0.688736	-0.806158	2.3095	1.15165	0.885993		0	0	0	1.94955	0	1.9898	2.25927	0	0
Abce1	10.7496	-1.58177	0.60194	4.50862	0.341527		11.2011	8.22721	2.15105	5.84864	5.43067	12.9337	9.94081	22.4265	18.5866
Abcf1	27.7492	2.22466	0.358859	5.66858	0.225304		28.8872	51.0087	32.2658	58.4864	39.8249	11.4414	6.32597	12.9838	8.51887
Abcf2	6.08347	-1.55701	0.801962	0.245898	0.993034		3.5372	6.58177	4.30211	1.94955	0	5.96941	8.58524	12.9838	10.8422
Abcf3	4.15584	-1.29626	0.900999	1.9407	0.746664		1.17907	6.58177	1.07553	1.94955	1.81022	6.96432	4.9704	5.90171	6.96999
Abcg1	5.68369	0.0274569	0.776283	4.70565	0.318854		2.35814	0	4.30211	13.6468	9.05112	3.97961	7.22968	8.26239	2.32333
Abcg2	0.398412	-0.661715	2.68912	0.93841	0.918987		1.17907	0	0	0	0	0	0.451855	1.18034	0.774443
Abcg3	0.398553	-0.950147	2.85426	0.549639	0.968492		0	0	0	0	0	0	0.451855	2.36068	0.774443
Abhd1	0.0860492	0.554858	3.52792	0.354142	0.986056		0	0	0	0	0	0	0	0	0.774443
Abhd10	1.85836	-0.453753	1.29487	1.05589	0.901206		2.35814	1.64544	2.15105	1.94955	0	0.497451	2.25927	3.54102	2.32333
Abhd11	4.7002	0.831951	0.790799	2.74783	0.600871		3.5372	6.58177	4.30211	9.74773	3.62045	1.49235	3.61484	7.08205	2.32333
Abhd12	15.4661	-1.45018	0.489996	2.18077	0.702551		8.84301	6.58177	11.8308	13.6468	3.62045	18.4057	26.6594	27.1479	22.4588
Abhd13	3.10566	-1.84885	1.13469	1.52488	0.822225		3.5372	0	2.15105	3.89909	0	4.47706	4.51855	4.72137	4.64666
Abhd14a	2.97373	1.54707	1.02665	1.10071	0.89416		3.5372	1.64544	6.45316	3.89909	5.43067	1.9898	2.25927	0	1.54889
Abhd14b	2.26117	0.799109	1.13055	1.63743	0.80205		2.35814	1.64544	2.15105	5.84864	1.81022	0.497451	1.35556	2.36068	2.32333
Abhd15	4.03324	1.40707	0.877245	1.77069	0.77784		4.12674	4.93633	4.30211	3.89909	9.05112	2.48726	0.451855	4.72137	2.32333
Abhd16a	4.0426	-2.90006	1.11767	1.47363	0.831302		2.35814	0	2.15105	0	1.81022	5.47196	8.58524	8.26239	7.74443
Abhd17a	38.5369	0.357573	0.298092	1.75378	0.780926		51.2895	42.7815	51.6253	35.0918	36.2045	36.8114	32.9854	25.9675	34.0755
Abhd17b	9.25739	0.091583	0.572621	1.12313	0.890585		11.2011	9.87266	9.67974	5.84864	10.8613	6.46686	6.77782	9.44273	13.1655
Abhd17c	9.87403	1.0578	0.549837	1.41654	0.841316		8.25348	13.1635	16.1329	9.74773	14.4818	3.97961	6.32597	8.26239	8.51887
Abhd18	0.380666	-0.112686	2.87227	1.01522	0.907479		0	0	1.07553	0	0	0.994902	1.35556	0	0
Abhd2	6.34022	-0.383139	0.689086	1.9675	0.741737		5.89534	4.93633	4.30211	9.74773	3.62045	6.96432	6.32597	10.6231	4.64666
Abhd4	4.51185	-2.3828	0.996429	1.40434	0.84344		1.17907	1.64544	0	1.94955	3.62045	5.47196	7.22968	9.44273	10.0678
Abhd5	4.38262	-1.24228	0.870086	0.16506	0.996776		3.5372	3.29089	3.22658	1.94955	1.81022	4.97451	5.42226	8.26239	6.96999
Abhd6	0.989696	-1.26848	1.70923	0.81508	0.936415		1.17907	0	2.15105	0	0	1.49235	1.35556	1.18034	1.54889
Abhd8	1.81266	-0.335189	1.34278	2.44578	0.65437		2.35814	1.64544	5.37763	0	0	1.49235	2.71113	1.18034	1.54889
Abi1	23.4912	-0.838721	0.391242	1.46854	0.832199		21.2232	19.7453	12.9063	11.6973	23.5329	28.3547	24.4002	40.1316	29.4288
Abi2	2.88935	-0.511475	1.09428	3.21426	0.522631		5.30581	0	5.37763	1.94955	1.81022	1.9898	4.51855	1.18034	3.87221
Abi3	13.2358	-0.675444	0.51182	3.00983	0.556183		7.07441	4.93633	17.2084	5.84864	16.292	20.3955	18.5261	11.8034	17.0377
Abitram	3.46166	0.700813	0.903069	0.0422219	0.99978		4.71627	3.29089	5.37763	3.89909	3.62045	2.98471	1.80742	2.36068	3.09777
Abl1	3.58693	-2.71962	1.15356	1.66494	0.797077		1.7686	0	2.15105	0	1.81022	4.47706	9.94081	8.26239	3.87221
Abl2	2.17581	-0.707079	1.29241	4.63048	0.327355		2.94767	1.64544	4.30211	0	0	0.497451	5.87411	3.54102	0.774443
Ablim1	2.27455	1.64487	1.16244	2.16941	0.704633		1.17907	1.64544	3.22658	5.84864	3.62045	0.497451	1.35556	0	3.09777
Ablim2	0.0552723	0.580731	3.52406	0.196393	0.995483		0	0	0	0	0	0.497451	0	0	0
Abr	13.0997	-1.99736	0.573558	1.3876	0.846348		10.0221	6.58177	8.60421	1.94955	3.62045	18.4057	19.8816	27.1479	21.6844
Abraxas1	2.53857	0.307019	1.04439	0.0993663	0.998806		2.94767	3.29089	2.15105	1.94955	3.62045	1.49235	2.71113	2.36068	2.32333
Abraxas2	5.577	-1.45751	0.802445	1.13909	0.888021		6.48487	1.64544	4.30211	1.94955	3.62045	8.95412	7.22968	8.26239	7.74443
Abt1	3.74913	-0.0131146	0.917844	0.605006	0.962506		4.71627	3.29089	5.37763	0	5.43067	1.9898	3.16298	5.90171	3.87221
Abtb1	7.11799	0.890728	0.653324	0.417709	0.981002		8.84301	11.5181	7.52868	11.6973	5.43067	5.96941	4.51855	2.36068	6.19554
Abtb2	0.671645	1.2147	2.18269	1.75826	0.780109		0	0	2.15105	1.94955	0	1.49235	0.451855	0	0
AC027740.1	0.311681	0.975478	3.45664	0.762139	0.943451		0	0	0	0	1.81022	0.994902	0	0	0
AC084822.1	0.248331	1.93761	3.53185	0.241836	0.993253		0.589534	1.64544	0	0	0	0	0	0	0
AC109196.1	2.98705	-1.06511	1.0379	0.68139	0.953604		2.35814	1.64544	1.07553	1.94955	3.62045	3.48216	4.9704	2.36068	5.4211
AC115752.1	0.355989	0.598316	2.79125	0.655095	0.956749		1.17907	0	1.07553	0	0	0.497451	0.451855	0	0
AC120557.1	6.51322	-0.624833	0.705532	1.42412	0.839992		2.94767	1.64544	7.52868	9.74773	3.62045	11.4414	7.22968	8.26239	6.19554
AC121792.2	0.0502061	0.556333	3.52771	0.113493	0.99845		0	0	0	0	0	0	0.451855	0	0
AC121792.3	0.0502061	0.556333	3.52771	0.113493	0.99845		0	0	0	0	0	0	0.451855	0	0
AC122031.1	0.0552723	0.580731	3.52406	0.196393	0.995483		0	0	0	0	0	0.497451	0	0	0
AC127551.1	0.624242	2.49615	2.17792	0.726914	0.947969		0.589534	1.64544	1.07553	0	1.81022	0.497451	0	0	0
AC131728.1	1.07261	0.874636	1.77384	2.54701	0.636238		1.17907	0	0	1.94955	3.62045	0	1.35556	0	1.54889
AC141881.10	0.182827	1.93753	3.53185	0.418463	0.980938		0	1.64544	0	0	0	0	0	0	0
AC141881.12	0.216616	1.88136	3.52396	0.630713	0.95959		0	0	0	1.94955	0	0	0	0	0
AC141881.13	0.248331	1.93761	3.53185	0.241836	0.993253		0.589534	1.64544	0	0	0	0	0	0	0
AC141881.16	0.119503	1.90859	3.52802	0.242736	0.993205		0	0	1.07553	0	0	0	0	0	0
AC141881.3	0.0655038	1.23144	3.53373	0.139814	0.997667		0.589534	0	0	0	0	0	0	0	0
AC141881.6	0.0860492	0.554858	3.52792	0.354142	0.986056		0	0	0	0	0	0	0	0	0.774443
AC142112.1	0.216616	1.88136	3.52396	0.630713	0.95959		0	0	0	1.94955	0	0	0	0	0
AC150312.1	0.0860492	0.554858	3.52792	0.354142	0.986056		0	0	0	0	0	0	0	0	0.774443
AC157927.1	0.216616	1.88136	3.52396	0.630713	0.95959		0	0	0	1.94955	0	0	0	0	0
AC159539.1	0.119503	1.90859	3.52802	0.242736	0.993205		0	0	1.07553	0	0	0	0	0	0
AC159819.1	15.8042	1.13058	0.447185	1.15909	0.884788		26.529	19.7453	25.8126	19.4955	14.4818	9.45157	9.94081	8.26239	8.51887
AC160336.1	27.9133	-3.13521	0.474475	7.94509	0.0936103		19.4546	4.93633	8.60421	5.84864	3.62045	52.7298	51.0596	50.7547	54.211
AC168314.1	7.25994	0.474189	0.651664	6.64474	0.155896		2.94767	9.87266	2.15105	7.79819	18.1022	3.97961	4.51855	5.90171	10.0678
Acaa1a	24.5376	0.954225	0.368225	2.44294	0.654882		20.0442	23.0362	33.3413	29.2432	47.0658	16.9133	14.4594	21.2461	15.4889
Acaa2	7.7161	-0.270435	0.654119	2.0665	0.723529		5.30581	6.58177	4.30211	15.5964	3.62045	4.47706	8.13339	8.26239	13.1655
Acaca	4.89357	0.0400567	0.772898	0.887485	0.926349		4.71627	8.22721	4.30211	5.84864	1.81022	4.97451	3.61484	5.90171	4.64666
Acad10	0.397971	0.559353	2.87162	1.54783	0.818137		0	0	0	1.94955	0	0	0.451855	1.18034	0
Acad11	0.433261	-1.58226	2.71992	0.223804	0.994187		0	0	0	0	0	0.994902	1.35556	0	1.54889
Acad12	0.756014	0.0842644	1.87982	0.189229	0.995797		1.17907	1.64544	1.07553	0	0	0.497451	0.451855	1.18034	0.774443
Acad8	3.60643	-0.38218	0.894715	0.159244	0.996993		2.94767	3.29089	2.15105	3.89909	3.62045	2.98471	4.9704	4.72137	3.87221
Acad9	4.17816	-0.25055	0.908287	1.91785	0.750866		4.71627	6.58177	4.30211	0	3.62045	4.47706	7.22968	5.90171	0.774443
Acadl	26.3406	-0.320236	0.352863	1.37246	0.848967		17.686	21.3908	24.7371	31.1928	19.9125	29.8471	24.4002	33.0496	34.8499
Acadm	6.99957	-0.501015	0.670697	2.4237	0.658349		6.48487	6.58177	7.52868	1.94955	7.2409	12.9337	8.58524	4.72137	6.96999
Acads	8.91635	0.711354	0.61202	2.32084	0.676977		5.89534	3.29089	17.2084	13.6468	12.6716	9.45157	9.48895	4.72137	3.87221
Acadsb	2.78054	0.0902914	1.02302	0.656801	0.956547		2.94767	3.29089	2.15105	3.89909	1.81022	0.994902	4.06669	3.54102	2.32333
Acadvl	8.8067	-0.0445823	0.586102	0.295682	0.990091		9.43254	9.87266	7.52868	7.79819	9.05112	6.96432	12.2001	9.44273	6.96999
Acap1	13.3316	-0.105957	0.50678	0.869832	0.928849		17.686	8.22721	11.8308	21.445	9.05112	12.4363	14.0075	8.26239	17.0377
Acap2	12.514	-0.499813	0.498769	0.791183	0.939626		10.6116	8.22721	9.67974	15.5964	9.05112	14.9235	11.7482	16.5248	16.2633
Acap3	4.72567	1.01784	0.797842	2.18431	0.701902		2.94767	1.64544	8.60421	11.6973	5.43067	2.48726	2.71113	2.36068	4.64666
Acat1	8.16531	-1.3788	0.665821	1.48068	0.830058		9.43254	3.29089	6.45316	3.89909	3.62045	13.9286	9.0371	12.9838	10.8422
Acat2	5.17451	0.539688	0.794489	3.79047	0.435104		7.07441	11.5181	4.30211	1.94955	5.43067	7.46177	4.51855	3.54102	0.774443
Acbd3	4.52795	-0.876387	0.882989	1.01316	0.907794		5.30581	4.93633	5.37763	0	1.81022	6.96432	2.71113	5.90171	7.74443
Acbd4	1.24705	1.98843	1.54837	0.605743	0.962423		1.7686	1.64544	2.15105	1.94955	1.81022	0.994902	0.90371	0	0
Acbd5	7.90355	-0.400144	0.637777	1.0382	0.903949		7.66394	3.29089	7.52868	11.6973	5.43067	6.96432	9.48895	5.90171	13.1655
Acbd6	23.9641	0.752636	0.367647	2.49333	0.645831		19.4546	21.3908	33.3413	33.1423	34.3943	17.9082	15.3631	25.9675	14.7144
Acbd7	0.119503	1.90859	3.52802	0.242736	0.993205		0	0	1.07553	0	0	0	0	0	0
Accs	2.59159	0.660126	1.06001	0.698328	0.951535		4.71627	3.29089	4.30211	1.94955	1.81022	1.49235	2.25927	1.18034	2.32333
Acd	6.11084	-0.88744	0.747208	1.90638	0.752972		5.30581	6.58177	7.52868	3.89909	0	10.4465	6.77782	8.26239	6.19554
Acer3	9.41278	-0.218575	0.561267	0.695116	0.95193		7.66394	6.58177	8.60421	9.74773	10.8613	7.95922	12.2001	11.8034	9.29332
Acin1	15.3672	0.0918715	0.445648	0.808316	0.93733		15.3279	18.0999	11.8308	13.6468	19.9125	16.4159	12.2001	17.7051	13.1655
Acly	34.6863	0.960421	0.312642	2.58585	0.629332		47.1627	34.5543	38.7189	56.5369	45.2556	21.8878	20.3335	30.6889	17.0377
Aco1	4.59536	-0.477383	0.816657	4.93958	0.293554		1.17907	3.29089	4.30211	1.94955	7.2409	6.46686	7.22968	1.18034	8.51887
Aco2	11.3252	-1.98696	0.618508	3.76155	0.439238		11.2011	4.93633	9.67974	1.94955	1.81022	16.4159	20.7853	18.8855	16.2633
Acod1	1.87448	0.210613	1.30524	5.25086	0.262512		0	4.93633	2.15105	1.94955	0	4.47706	1.80742	0	1.54889
Acot1	0.313976	1.23505	3.45794	0.838686	0.933188		0	1.64544	0	0	0	0	0	1.18034	0
Acot11	2.44646	0.290354	1.07626	0.258041	0.992359		2.35814	1.64544	2.15105	5.84864	1.81022	1.9898	2.71113	1.18034	2.32333
Acot13	6.60901	-0.90514	0.727018	2.67572	0.613469		5.89534	8.22721	2.15105	3.89909	3.62045	5.47196	4.06669	12.9838	13.1655
Acot2	0.895088	0.191332	1.82026	2.53464	0.638443		0	1.64544	2.15105	0	0	0.994902	0.90371	2.36068	0
Acot4	0.0502061	0.556333	3.52771	0.113493	0.99845		0	0	0	0	0	0	0.451855	0	0
Acot6	0.559104	-1.70425	2.32111	0.588536	0.964329		0.589534	0	0	0	0	1.9898	0.90371	0	1.54889
Acot7	29.7017	0.523268	0.328528	1.40484	0.843353		31.8348	29.618	38.7189	37.0414	32.584	21.8878	24.4002	31.8692	19.3611
Acot8	4.04746	0.526319	0.89535	0.407908	0.981824		4.12674	4.93633	8.60421	0	5.43067	4.47706	1.80742	4.72137	2.32333
Acot9	6.36183	-0.56879	0.711885	2.61106	0.624864		10.6116	4.93633	6.45316	1.94955	5.43067	8.95412	7.22968	4.72137	6.96999
Acox1	7.25924	0.126847	0.662302	2.09312	0.718637		11.2011	4.93633	10.7553	1.94955	10.8613	4.47706	6.32597	7.08205	7.74443
Acox3	16.8619	-0.186158	0.431274	0.877898	0.92771		11.2011	21.3908	12.9063	19.4955	12.6716	16.4159	19.4298	18.8855	19.3611
Acp1	8.79453	-0.640525	0.60687	1.33185	0.855949		8.84301	8.22721	5.37763	7.79819	5.43067	10.4465	8.13339	7.08205	17.8122
Acp2	6.87665	-0.595962	0.661614	0.355849	0.985929		5.30581	4.93633	6.45316	3.89909	7.2409	7.46177	9.0371	8.26239	9.29332
Acp5	3.03681	-2.81644	1.27874	1.14526	0.887026		2.35814	0	1.07553	0	1.81022	5.96941	3.61484	7.08205	5.4211
Acp6	2.58369	-0.622586	1.07756	0.515223	0.972002		3.5372	1.64544	2.15105	1.94955	1.81022	2.48726	2.25927	3.54102	3.87221
Acpp	0.785757	-0.547687	1.84443	1.3201	0.857956		0	1.64544	1.07553	0	0	1.49235	0.90371	1.18034	0.774443
Acrbp	1.57962	1.08901	1.40974	0.819739	0.935782		1.17907	1.64544	1.07553	1.94955	3.62045	2.48726	2.25927	0	0
Acsf2	4.91486	-0.853222	0.801087	0.733578	0.947124		3.5372	3.29089	2.15105	5.84864	3.62045	5.96941	7.68153	8.26239	3.87221
Acsf3	2.64008	0.509231	1.12673	3.98118	0.408559		1.7686	6.58177	7.52868	0	0	2.48726	2.25927	2.36068	0.774443
Acsl1	4.21534	-0.494096	0.876959	2.37499	0.667151		5.89534	4.93633	4.30211	1.94955	1.81022	5.47196	5.42226	1.18034	6.96999
Acsl3	1.11287	0.452833	1.71113	0.951838	0.917009		1.7686	0	1.07553	3.89909	0	0.497451	0.451855	0	2.32333
Acsl4	12.7309	-0.297478	0.501885	0.776147	0.941617		14.7383	13.1635	9.67974	15.5964	7.2409	14.4261	16.7186	10.6231	12.3911
Acsl5	27.6216	-0.319864	0.391326	0.964706	0.9151		31.8348	32.9089	30.1147	27.2937	7.2409	24.3751	28.9187	29.5085	36.3988
Acsl6	0.0502061	0.556333	3.52771	0.113493	0.99845		0	0	0	0	0	0	0.451855	0	0
Acss1	6.4834	-0.914083	0.767938	6.90389	0.141055		11.7907	8.22721	6.45316	0	1.81022	10.4465	9.0371	8.26239	2.32333
Acss2	1.34547	-0.753385	1.59626	1.9212	0.750249		2.94767	1.64544	0	1.94955	0	2.98471	1.80742	0	0.774443
Acta2	4.2402	-2.81853	1.09726	3.42283	0.489709		1.17907	0	1.07553	0	3.62045	3.97961	4.51855	10.6231	13.1655
Actbl2	0.0502061	0.556333	3.52771	0.113493	0.99845		0	0	0	0	0	0	0.451855	0	0
Actc1	0.889138	-1.96183	2.07599	1.45772	0.834104		0	0	0	0	0	0.994902	0	2.36068	4.64666
Actg-ps1	0.692403	-0.70759	2.34335	2.41567	0.659797		1.17907	0	0	0	0	0	0	1.18034	3.87221
Actg2	0.839119	1.56832	1.93446	2.60706	0.625574		1.17907	3.29089	0	0	1.81022	0.497451	0	0	0.774443
Actl6a	5.992	-2.22589	0.8978	2.08131	0.720807		3.5372	0	0	7.79819	3.62045	14.4261	8.13339	9.44273	6.96999
Actn1	21.8052	-2.02998	0.447658	0.993489	0.910782		10.6116	4.93633	12.9063	5.84864	12.6716	33.3292	37.0521	42.4923	36.3988
Actn4	8.84156	-2.28802	0.702247	0.694002	0.952066		4.71627	3.29089	5.37763	1.94955	1.81022	14.9235	16.2668	16.5248	14.7144
Actr10	14.5594	0.532271	0.454475	1.58486	0.81151		15.9174	14.809	19.3595	23.3946	10.8613	11.9388	11.2964	14.1641	9.29332
Actr1a	19.6521	0.266101	0.403156	1.42371	0.840063		27.1186	18.0999	17.2084	27.2937	19.9125	12.9337	20.3335	17.7051	16.2633
Actr1b	7.69425	-1.3348	0.686035	2.24938	0.69		10.0221	3.29089	5.37763	3.89909	3.62045	13.9286	7.68153	8.26239	13.1655
Actr3-ps	1.40938	1.74367	1.68164	0.738146	0.946543		1.7686	0	0	5.84864	3.62045	0.994902	0.451855	0	0
Actr3b	0.191528	-0.625247	3.48578	0.0804802	0.999212		0	0	0	0	0	0.497451	0.451855	0	0.774443
Actr5	7.29594	1.66915	0.654183	1.14198	0.887556		8.25348	16.4544	8.60421	11.6973	7.2409	3.48216	4.06669	3.54102	2.32333
Actr6	1.73126	-0.812389	1.41664	1.04446	0.902981		1.17907	4.93633	1.07553	0	0	0.497451	3.61484	1.18034	3.09777
Actr8	3.69723	-0.264745	0.912589	1.59287	0.810072		3.5372	4.93633	4.30211	1.94955	1.81022	4.97451	3.61484	1.18034	6.96999
Acvr1	0.744649	-2.02953	2.0955	0.839954	0.933013		0.589534	0	0	0	0	1.49235	2.25927	2.36068	0
Acvr1b	1.65956	0.796202	1.38043	2.31466	0.678101		1.17907	3.29089	0	3.89909	1.81022	1.49235	0.90371	2.36068	0
Acvr2a	0.755659	-0.81413	2.02701	1.22408	0.874119		0.589534	0	1.07553	0	0	0	0.451855	2.36068	2.32333
Acvr2b	0.336119	2.50307	3.34223	0.604599	0.962551		0	0	1.07553	1.94955	0	0	0	0	0
Acvrl1	18.9131	0.50908	0.409088	0.89432	0.925374		16.507	14.809	26.8882	25.3441	23.5329	18.4057	15.8149	16.5248	12.3911
Acy1	0.755018	-0.162197	2.00131	0.902941	0.924138		0	0	1.07553	1.94955	0	0.994902	0.451855	0	2.32333
Acyp1	3.03189	-0.608206	1.0286	1.43823	0.837523		3.5372	1.64544	3.22658	1.94955	1.81022	3.48216	2.71113	1.18034	7.74443
Acyp2	0.110545	0.274777	3.51217	0.4094	0.9817		0	0	0	0	0	0.994902	0	0	0
Ada	3.00716	0.221339	1.03378	0.712698	0.949754		4.71627	1.64544	5.37763	5.84864	0	2.48726	2.71113	1.18034	3.09777
Adal	0.74199	-1.05738	1.93244	0.794016	0.939249		1.17907	1.64544	0	0	0	0.994902	0.90371	1.18034	0.774443
Adam10	22.6599	0.157514	0.374406	2.30372	0.680092		32.4244	26.3271	17.2084	27.2937	19.9125	20.3955	16.2668	22.4265	21.6844
Adam11	0.681284	0.0595397	2.1606	1.85479	0.762444		0.589534	0	2.15105	0	0	2.48726	0.90371	0	0
Adam12	0.0552723	0.580731	3.52406	0.196393	0.995483		0	0	0	0	0	0.497451	0	0	0
Adam15	9.49463	-1.10932	0.618629	2.56909	0.632308		9.43254	3.29089	10.7553	3.89909	5.43067	7.46177	10.8445	16.5248	17.8122
Adam17	8.70211	-1.15887	0.633896	0.353422	0.98611		5.89534	9.87266	5.37763	5.84864	1.81022	10.9439	14.0075	10.6231	13.94
Adam19	8.10403	-2.39398	0.751873	0.666074	0.955446		4.12674	1.64544	1.07553	3.89909	5.43067	14.4261	15.8149	11.8034	14.7144
Adam22	0.337974	-0.648321	2.85063	0.570222	0.966315		0.589534	0	0	0	0	0.497451	0	1.18034	0.774443
Adam23	2.59265	0.00496195	1.11908	1.7509	0.781452		2.35814	0	1.07553	7.79819	3.62045	1.49235	2.71113	1.18034	3.09777
Adam3	0.0502061	0.556333	3.52771	0.113493	0.99845		0	0	0	0	0	0	0.451855	0	0
Adam33	0.0860492	0.554858	3.52792	0.354142	0.986056		0	0	0	0	0	0	0	0	0.774443
Adam8	21.6642	-3.18744	0.543374	1.49633	0.827291		8.25348	4.93633	5.37763	1.94955	5.43067	35.319	38.4077	51.935	43.3688
Adam9	1.82609	-1.97711	1.40105	1.14207	0.887541		1.17907	0	1.07553	0	1.81022	4.47706	3.61484	1.18034	3.09777
Adamts10	2.64413	0.188416	1.06201	0.93533	0.919438		2.35814	3.29089	3.22658	1.94955	1.81022	4.47706	0.451855	2.36068	3.87221
Adamts12	0.0860492	0.554858	3.52792	0.354142	0.986056		0	0	0	0	0	0	0	0	0.774443
Adamts13	0.521126	2.81571	2.60825	0.556946	0.967726		0.589534	0	2.15105	1.94955	0	0	0	0	0
Adamts17	0.0552723	0.580731	3.52406	0.196393	0.995483		0	0	0	0	0	0.497451	0	0	0
Adamts2	0.170982	-0.0378713	3.5087	0.202552	0.995205		0.589534	0	0	0	0	0.497451	0.451855	0	0
Adamts6	0.40366	-1.2007	2.82558	0.365961	0.985168		0	0	0	0	0	0	0.90371	1.18034	1.54889
Adamtsl2	0.0655038	1.23144	3.53373	0.139814	0.997667		0.589534	0	0	0	0	0	0	0	0
Adamtsl4	0.141322	-0.0390657	3.50888	0.269053	0.991723		0	0	0	0	0	0.497451	0	0	0.774443
Adamtsl5	0.302072	-1.0551	3.17114	0.205327	0.995077		0	0	0	0	0	1.49235	0.451855	0	0.774443
Adap1	18.1739	1.7955	0.455872	7.33219	0.119341		15.9174	21.3908	37.6434	15.5964	39.8249	12.4363	12.2001	2.36068	6.19554
Adap2	0.46547	0.0233875	2.67784	1.59932	0.808914		0	1.64544	0	0	0	0.994902	0	0	1.54889
Adar	13.0674	0.253778	0.491429	4.47609	0.345392		8.84301	6.58177	25.8126	11.6973	16.292	10.9439	14.4594	8.26239	14.7144
Adarb1	0.0502061	0.556333	3.52771	0.113493	0.99845		0	0	0	0	0	0	0.451855	0	0
Adat1	0.503209	0.873761	2.65222	1.44065	0.8371		0.589534	0	0	1.94955	0	1.9898	0	0	0
Adat2	2.00168	0.10039	1.15324	0.361733	0.985488		1.17907	1.64544	3.22658	1.94955	1.81022	2.48726	1.80742	2.36068	1.54889
Adat3	0.510428	0.335834	2.44156	1.64429	0.80081		1.17907	1.64544	0	0	0	0.994902	0	0	0.774443
Adck1	3.10452	-0.430318	0.990127	1.88598	0.756721		1.17907	1.64544	3.22658	1.94955	3.62045	1.9898	4.51855	8.26239	1.54889
Adck2	3.24943	-2.37682	1.1848	1.70429	0.789938		3.5372	0	2.15105	0	1.81022	6.46686	5.87411	7.08205	2.32333
Adck5	3.8089	0.979709	0.909754	1.22657	0.873705		4.71627	3.29089	2.15105	11.6973	3.62045	1.49235	2.25927	1.18034	3.87221
Adcy3	0.542945	1.2289	2.34991	0.118108	0.998323		0.589534	0	1.07553	1.94955	0	0.497451	0	0	0.774443
Adcy4	0.119503	1.90859	3.52802	0.242736	0.993205		0	0	1.07553	0	0	0	0	0	0
Adcy6	0.770558	-0.760876	2.17552	2.59839	0.627109		0	1.64544	0	0	0	3.48216	1.80742	0	0
Adcy7	12.8914	-1.95387	0.581404	8.34451	0.0797429		20.6337	4.93633	6.45316	3.89909	3.62045	16.4159	17.1705	18.8855	24.0077
Adcy9	0.320639	2.52046	3.4101	0.49945	0.973555		0	0	1.07553	0	1.81022	0	0	0	0
Add1	14.2422	-0.126336	0.469396	1.25523	0.868924		15.3279	9.87266	19.3595	11.6973	12.6716	12.9337	15.8149	18.8855	11.6166
Add3	5.91405	-0.933516	0.742027	1.03462	0.904502		7.07441	4.93633	3.22658	3.89909	3.62045	5.96941	7.68153	10.6231	6.19554
Adgra2	1.17732	-0.365699	1.72473	2.5485	0.635973		1.17907	4.93633	0	0	0	0.994902	2.71113	0	0.774443
Adgra3	0.119503	1.90859	3.52802	0.242736	0.993205		0	0	1.07553	0	0	0	0	0	0
Adgrb1	0.131149	0.524317	3.53196	0.570973	0.966234		0	0	0	0	0	0	0	1.18034	0
Adgrb2	0.336119	2.50307	3.34223	0.604599	0.962551		0	0	1.07553	1.94955	0	0	0	0	0
Adgre1	14.0269	-1.35182	0.514659	0.775685	0.941678		8.25348	9.87266	7.52868	7.79819	7.2409	11.9388	24.852	22.4265	26.3311
Adgre4	1.41633	1.23604	1.68344	3.49553	0.478558		5.30581	1.64544	0	0	3.62045	0.994902	0	1.18034	0
Adgre5	9.23181	-1.39813	0.646115	3.10339	0.540675		8.84301	9.87266	3.22658	0	9.05112	14.4261	13.1038	10.6231	13.94
Adgrf5	0.0860492	0.554858	3.52792	0.354142	0.986056		0	0	0	0	0	0	0	0	0.774443
Adgrg1	2.39374	-1.30424	1.21809	1.16173	0.884359		2.35814	1.64544	4.30211	0	0	3.48216	2.71113	4.72137	2.32333
Adgrg3	1.49492	-0.442006	1.40061	2.94882	0.566427		1.17907	1.64544	1.07553	1.94955	0	2.98471	2.25927	2.36068	0
Adgrg5	3.13988	0.37166	1.03621	3.59601	0.463431		5.89534	0	2.15105	3.89909	7.2409	0.994902	1.80742	4.72137	1.54889
Adgrg6	0.792026	0.130517	2.04818	3.28515	0.511289		1.7686	0	2.15105	0	0	0.497451	2.71113	0	0
Adgrg7	0.0552723	0.580731	3.52406	0.196393	0.995483		0	0	0	0	0	0.497451	0	0	0
Adgrl1	0.327783	-1.1756	3.0597	0.202849	0.995191		0	0	0	0	0	0.497451	0.90371	0	1.54889
Adgrl2	0.191528	-0.625247	3.48578	0.0804802	0.999212		0	0	0	0	0	0.497451	0.451855	0	0.774443
Adgrl4	0.0502061	0.556333	3.52771	0.113493	0.99845		0	0	0	0	0	0	0.451855	0	0
Adh5	14.7519	-1.35171	0.496256	2.40532	0.661666		12.9697	9.87266	10.7553	9.74773	3.62045	19.4006	25.7557	23.6068	17.0377
Adh7	0.100412	0.255999	3.51218	0.294189	0.990186		0	0	0	0	0	0	0.90371	0	0
Adi1	3.75143	-1.02788	0.977577	1.26424	0.867413		2.35814	1.64544	7.52868	1.94955	0	4.47706	4.51855	3.54102	7.74443
Adipor1	22.8212	-1.49963	0.416551	2.09486	0.718318		20.0442	16.4544	9.67974	15.5964	7.2409	29.3496	32.0817	37.7709	37.1733
Adipor2	25.8725	-0.581436	0.368397	1.04194	0.903372		17.686	13.1635	20.435	21.445	32.584	32.8318	30.2743	34.2299	30.2033
Adk	3.35636	0.396841	0.918251	0.655627	0.956686		2.35814	3.29089	3.22658	3.89909	5.43067	3.97961	4.51855	1.18034	2.32333
Adm	0.131008	1.23148	3.53373	0.375723	0.984416		1.17907	0	0	0	0	0	0	0	0
Adnp	6.29861	-3.33226	1.03507	6.987	0.136577		7.66394	0	1.07553	3.89909	0	8.45667	9.0371	14.1641	12.3911
Adnp2	1.49587	-2.51431	1.54877	0.872475	0.928476		1.17907	0	0	1.94955	0	2.48726	3.16298	2.36068	2.32333
Ado	6.40426	0.0405728	0.664805	0.0415721	0.999787		5.89534	6.58177	6.45316	5.84864	7.2409	6.46686	5.87411	7.08205	6.19554
Adora2a	3.05078	1.15033	0.987012	0.173207	0.99646		3.5372	1.64544	5.37763	3.89909	5.43067	3.48216	1.35556	1.18034	1.54889
Adora2b	0.469163	-1.21305	2.50417	0.644631	0.957977		0.589534	0	0	0	0	0	0.90371	1.18034	1.54889
Adora3	6.24034	0.0979564	0.667956	0.716372	0.949295		4.12674	6.58177	5.37763	7.79819	7.2409	5.96941	5.42226	5.90171	7.74443
Adpgk	11.1925	0.0716632	0.548745	1.28829	0.863359		14.1488	6.58177	8.60421	11.6973	18.1022	7.95922	14.4594	12.9838	6.19554
Adprh	12.8081	-0.826548	0.50658	0.403574	0.982183		12.3802	8.22721	8.60421	11.6973	9.05112	17.4108	19.4298	12.9838	15.4889
Adprm	1.80481	-0.652037	1.31159	1.01387	0.907686		0.589534	0	2.15105	1.94955	1.81022	3.48216	3.16298	0	3.09777
Adprs	7.40236	0.0102551	0.650152	2.30349	0.680134		7.66394	3.29089	10.7553	9.74773	5.43067	3.97961	5.87411	8.26239	11.6166
Adra1a	0.201136	1.90711	3.52782	0.53154	0.970359		0	0	0	0	1.81022	0	0	0	0
Adra2a	0.119503	1.90859	3.52802	0.242736	0.993205		0	0	1.07553	0	0	0	0	0	0
Adrb2	1.65672	0.848715	1.35251	3.507	0.476815		2.94767	3.29089	2.15105	1.94955	0	2.48726	0.90371	1.18034	0
Adrm1	19.2377	0.316137	0.398522	0.387677	0.983473		18.2756	23.0362	19.3595	21.445	21.7227	13.4312	17.6223	18.8855	19.3611
Adsl	9.60495	0.135918	0.559381	1.09635	0.894851		12.9697	8.22721	9.67974	7.79819	12.6716	5.96941	10.3927	9.44273	9.29332
Adss	11.2047	-0.563883	0.523073	1.38231	0.847264		6.48487	11.5181	9.67974	11.6973	5.43067	13.4312	14.4594	16.5248	11.6166
Adssl1	5.57745	-1.877	0.855136	0.792491	0.939452		1.7686	1.64544	4.30211	3.89909	0	6.96432	5.87411	11.8034	13.94
Aebp1	0.594423	-0.538168	2.1605	1.28249	0.864339		0.589534	0	0	0	1.81022	0.497451	0.90371	0	1.54889
Aebp2	13.2282	-0.823864	0.508522	0.105241	0.998663		11.2011	13.1635	8.60421	5.84864	10.8613	12.9337	18.5261	22.4265	15.4889
AEKR01077154.1	1.22367	-1.48336	1.61835	1.60359	0.808146		0.589534	0	0	0	3.62045	1.9898	0.90371	2.36068	1.54889
Aen	10.4619	1.72585	0.550451	3.18615	0.527172		8.84301	24.6816	16.1329	9.74773	14.4818	6.96432	3.16298	4.72137	5.4211
AF067061	0.523671	0.00121061	2.29558	1.06917	0.899133		1.17907	0	0	0	1.81022	0.497451	0.451855	0	0.774443
AF357399	0.119503	1.90859	3.52802	0.242736	0.993205		0	0	1.07553	0	0	0	0	0	0
Afap1	0.428014	-1.16875	2.57904	0.747145	0.94539		1.17907	0	0	0	0	0.994902	0.90371	0	0.774443
Afdn	2.28756	-3.2805	1.39545	0.444964	0.978633		0.589534	0	0	1.94955	0	5.47196	3.61484	3.54102	5.4211
Aff1	14.1558	0.132261	0.470739	1.98549	0.738429		7.66394	18.0999	9.67974	15.5964	19.9125	10.4465	16.7186	15.3444	13.94
Aff3	3.22582	-1.14098	1.06109	2.99867	0.558048		5.89534	1.64544	2.15105	3.89909	0	3.97961	6.77782	2.36068	2.32333
Aff4	4.66223	-1.04556	0.859121	4.05179	0.399042		1.7686	6.58177	3.22658	0	3.62045	4.97451	8.58524	2.36068	10.8422
Afg1l	0.77291	2.2047	2.16905	0.627716	0.959935		2.35814	0	2.15105	1.94955	0	0.497451	0	0	0
Afg3l1	9.95505	-0.242433	0.584507	0.383578	0.983799		11.7907	9.87266	5.37763	7.79819	12.6716	9.94902	14.9112	11.8034	5.4211
Afg3l2	3.85905	-2.52821	1.10471	0.566005	0.966765		2.35814	1.64544	1.07553	0	1.81022	5.47196	6.32597	10.6231	5.4211
Afmid	0.866834	-1.33636	1.95485	2.27458	0.685402		0	0	0	0	1.81022	1.9898	0.90371	0	3.09777
Afp	0.2468	-0.886836	3.44615	0.118537	0.998312		0	0	0	0	0	0.994902	0.451855	0	0.774443
Aftph	11.9895	-0.00774157	0.502793	0.96135	0.915599		14.7383	14.809	12.9063	7.79819	10.8613	12.4363	11.7482	9.44273	13.1655
Aga	3.97645	0.210901	0.85553	0.563785	0.967002		3.5372	1.64544	3.22658	7.79819	5.43067	3.97961	3.16298	2.36068	4.64666
Agap1	1.84121	-0.138527	1.20641	0.888167	0.926252		0.589534	1.64544	2.15105	1.94955	1.81022	2.98471	2.71113	1.18034	1.54889
Agap2	3.36692	-0.988758	1.0045	0.771286	0.942256		4.12674	1.64544	3.22658	0	3.62045	2.98471	4.51855	7.08205	3.09777
Agap3	5.15566	-1.13846	0.809192	1.83257	0.766518		2.94767	0	3.22658	5.84864	5.43067	5.96941	5.42226	8.26239	9.29332
Agbl2	0.119503	1.90859	3.52802	0.242736	0.993205		0	0	1.07553	0	0	0	0	0	0
Agbl3	0.2919	-0.902887	3.22358	0.223904	0.994182		0	0	0	0	0	0.994902	0.451855	1.18034	0
Agbl5	0.331733	-0.772263	3.06909	0.488409	0.97462		0.589534	0	0	0	0	1.49235	0.90371	0	0
Ager	0.464947	2.5312	2.74387	0.554153	0.96802		0.589534	1.64544	0	1.94955	0	0	0	0	0
Agfg1	8.29199	0.162423	0.586427	1.23288	0.872657		5.89534	6.58177	7.52868	13.6468	9.05112	7.95922	6.77782	9.44273	7.74443
Agfg2	5.70824	-0.0558623	0.732637	3.36151	0.499246		4.12674	3.29089	4.30211	3.89909	12.6716	4.97451	7.22968	2.36068	8.51887
Aggf1	7.94879	-0.441509	0.646426	0.744731	0.9457		7.66394	4.93633	9.67974	3.89909	7.2409	10.4465	7.68153	15.3444	4.64666
Agk	0.739935	-1.16086	1.94955	0.598901	0.963186		0.589534	0	0	0	1.81022	0.497451	1.80742	1.18034	0.774443
Agl	3.6907	-0.051622	0.900704	0.740019	0.946304		4.12674	3.29089	7.52868	1.94955	1.81022	3.48216	3.61484	3.54102	3.87221
Agmo	0.0860492	0.554858	3.52792	0.354142	0.986056		0	0	0	0	0	0	0	0	0.774443
Ago1	4.05503	-0.528216	0.862434	0.655412	0.956712		1.7686	4.93633	3.22658	1.94955	3.62045	2.48726	6.77782	7.08205	4.64666
Ago2	9.87614	-1.72707	0.64042	1.97373	0.740591		10.0221	6.58177	7.52868	1.94955	1.81022	12.9337	14.4594	18.8855	14.7144
Ago3	1.29547	-0.527763	1.53559	2.59062	0.628485		1.17907	0	2.15105	0	1.81022	0.497451	4.06669	1.18034	0.774443
Ago4	3.6269	-0.0292948	0.919476	1.29868	0.8616		3.5372	1.64544	1.07553	7.79819	5.43067	2.98471	3.16298	2.36068	4.64666
Agpat1	14.6202	-0.175759	0.470611	1.92129	0.750233		14.7383	9.87266	18.2839	9.74773	16.292	16.9133	12.6519	10.6231	22.4588
Agpat2	7.62708	0.686934	0.623391	3.27075	0.51358		5.30581	3.29089	8.60421	11.6973	16.292	4.47706	4.51855	8.26239	6.19554
Agpat3	11.0565	-1.44414	0.578613	1.66904	0.796333		4.12674	8.22721	2.15105	5.84864	10.8613	15.421	15.3631	21.2461	16.2633
Agpat4	2.49417	-0.425628	1.09488	2.64033	0.619696		1.17907	3.29089	2.15105	0	3.62045	1.9898	3.61484	1.18034	5.4211
Agpat5	18.7111	0.718461	0.41572	0.942165	0.918435		18.8651	27.9725	25.8126	21.445	16.292	14.9235	9.48895	18.8855	14.7144
Agps	10.1666	-0.552978	0.563391	0.54417	0.969061		11.7907	11.5181	7.52868	7.79819	5.43067	8.95412	13.1038	12.9838	12.3911
Agrn	0.736556	0.0181514	2.10037	2.0408	0.728254		0.589534	0	2.15105	0	0	2.98471	0.90371	0	0
Agtpbp1	2.79407	-1.3138	1.13884	0.412789	0.981416		2.94767	1.64544	1.07553	0	3.62045	2.98471	5.42226	5.90171	1.54889
Agtrap	10.4571	0.985951	0.543181	2.13672	0.710629		7.66394	9.87266	19.3595	19.4955	9.05112	5.47196	7.22968	5.90171	10.0678
Ahctf1	5.17254	-0.327053	0.780202	0.998496	0.910024		5.89534	8.22721	6.45316	1.94955	1.81022	4.97451	6.32597	4.72137	6.19554
Ahcy	9.80386	-0.0840904	0.573946	3.3776	0.496732		11.7907	11.5181	13.9818	5.84864	5.43067	12.4363	11.2964	3.54102	12.3911
Ahcyl1	12.6423	-1.06042	0.528622	2.55038	0.635637		11.2011	11.5181	10.7553	1.94955	9.05112	15.9184	17.1705	12.9838	23.2333
Ahcyl2	4.85572	-1.07353	0.827457	2.70668	0.608046		1.7686	1.64544	2.15105	9.74773	1.81022	5.47196	5.87411	8.26239	6.96999
Ahdc1	1.12968	1.7745	1.79027	1.08666	0.896383		2.94767	1.64544	4.30211	0	0	0.497451	0	0	0.774443
Ahi1	1.50667	0.433252	1.34965	0.645921	0.957827		1.7686	1.64544	1.07553	1.94955	1.81022	0.497451	0.90371	2.36068	1.54889
Ahnak2	1.32393	-0.610586	1.47154	2.23102	0.693354		0	0	1.07553	1.94955	1.81022	1.49235	0.90371	2.36068	2.32333
Ahr	3.35942	-2.5004	1.18464	5.17202	0.270098		0.589534	6.58177	0	0	0	7.95922	4.51855	8.26239	2.32333
Ahrr	3.12285	-3.67365	1.2737	2.12519	0.712746		1.17907	0	1.07553	0	0	3.97961	9.0371	3.54102	9.29332
Ahsa1	19.3239	-0.165052	0.402113	2.26356	0.687411		15.3279	11.5181	20.435	19.4955	23.5329	17.4108	19.4298	18.8855	27.8799
Ahsa2	3.31217	-0.335791	0.977499	0.840411	0.93295		2.94767	1.64544	5.37763	0	5.43067	4.47706	4.06669	3.54102	2.32333
AI182371	0.131149	0.524317	3.53196	0.570973	0.966234		0	0	0	0	0	0	0	1.18034	0
AI413582	13.9575	-0.609515	0.473935	0.808574	0.937295		10.0221	11.5181	11.8308	7.79819	14.4818	19.898	15.3631	15.3444	19.3611
AI429214	0.324149	0.574465	3.11149	0.990543	0.911227		0	1.64544	0	0	0	0.497451	0	0	0.774443
AI467606	10.5297	-1.21769	0.620345	2.80411	0.591123		12.3802	0	7.52868	11.6973	7.2409	12.9337	15.3631	8.26239	19.3611
AI480526	2.05499	-1.37928	1.25336	1.52066	0.822975		1.7686	1.64544	1.07553	0	1.81022	3.97961	3.16298	1.18034	3.87221
AI504432	4.3171	-0.744443	0.868713	2.43825	0.655726		5.30581	1.64544	2.15105	7.79819	1.81022	4.47706	3.16298	7.08205	5.4211
AI506816	19.9786	0.306882	0.405629	0.915128	0.922381		19.4546	27.9725	26.8882	11.6973	21.7227	17.9082	18.9779	21.2461	13.94
AI597479	1.82103	-1.55038	1.36433	3.39555	0.493937		0	1.64544	2.15105	0	0	3.48216	3.61484	4.72137	0.774443
AI661453	0.160751	-0.317221	3.49708	0.201873	0.995236		0	0	0	0	0	0.994902	0.451855	0	0
AI662270	35.1893	-0.171815	0.309406	1.6956	0.791517		35.372	37.8452	31.1903	33.1423	28.9636	38.8012	34.341	48.394	28.6544
AI837181	12.0678	0.202992	0.53427	4.05691	0.398358		7.66394	1.64544	16.1329	17.5459	21.7227	9.94902	11.7482	8.26239	13.94
AI839979	1.21012	0.677777	1.71445	2.66082	0.616089		1.17907	0	3.22658	1.94955	0	0.994902	0	3.54102	0
AI847159	0.182827	1.93753	3.53185	0.418463	0.980938		0	1.64544	0	0	0	0	0	0	0
AI854703	0.271889	1.23061	3.52497	0.678706	0.953929		0	0	0	1.94955	0	0.497451	0	0	0
AI987944	2.01463	-3.59544	1.46559	3.88372	0.421972		2.35814	0	0	0	0	3.97961	3.16298	7.08205	1.54889
Aida	5.19526	-2.31673	0.963534	4.08773	0.394264		7.07441	0	5.37763	0	1.81022	8.95412	9.48895	7.08205	6.96999
Aif1l	0.182827	1.93753	3.53185	0.418463	0.980938		0	1.64544	0	0	0	0	0	0	0
Aifm1	4.22453	-1.06192	0.90246	0.793363	0.939336		3.5372	4.93633	2.15105	0	3.62045	4.97451	3.16298	9.44273	6.19554
Aifm2	1.40459	-0.341191	1.44348	0.751269	0.944859		2.35814	1.64544	1.07553	0	1.81022	1.9898	1.80742	1.18034	0.774443
Aig1	1.59666	0.136955	1.33283	0.476698	0.975729		1.7686	1.64544	1.07553	1.94955	1.81022	1.9898	1.80742	0	2.32333
Aim2	3.74206	-2.44846	1.07059	3.76279	0.439059		1.7686	1.64544	1.07553	0	1.81022	6.96432	9.94081	1.18034	9.29332
Aimp1	11.8193	-0.563409	0.56265	1.70967	0.78896		12.9697	3.29089	10.7553	5.84864	19.9125	14.4261	18.0742	11.8034	9.29332
Aimp2	9.36352	1.35446	0.564998	0.821981	0.935477		9.43254	13.1635	16.1329	11.6973	12.6716	6.46686	4.9704	3.54102	6.19554
Aip	15.3295	-0.576039	0.48748	0.716252	0.94931		16.507	11.5181	12.9063	5.84864	18.1022	21.8878	19.8816	21.2461	10.0678
Aipl1	0.0655038	1.23144	3.53373	0.139814	0.997667		0.589534	0	0	0	0	0	0	0	0
Ajuba	0.720648	-1.08927	1.99956	1.8304	0.766917		0	0	0	1.94955	0	0.497451	0.90371	2.36068	0.774443
Ak1	0.272511	-0.624009	3.48767	0.343864	0.986809		0	0	0	0	0	0	0.90371	0	1.54889
Ak2	17.5064	-0.0456143	0.427196	0.694796	0.951969		17.686	24.6816	16.1329	17.5459	10.8613	18.9031	16.2668	15.3444	20.1355
Ak3	3.53053	-1.53622	1.02579	1.16235	0.884258		4.12674	1.64544	3.22658	1.94955	0	3.48216	4.06669	7.08205	6.19554
Ak4	0.131149	0.524317	3.53196	0.570973	0.966234		0	0	0	0	0	0	0	1.18034	0
Ak5	0.131149	0.524317	3.53196	0.570973	0.966234		0	0	0	0	0	0	0	1.18034	0
Ak6	11.3711	-0.42958	0.515542	2.70707	0.607977		4.12674	11.5181	11.8308	5.84864	12.6716	14.4261	15.3631	14.1641	12.3911
Ak7	0.100412	0.255999	3.51218	0.294189	0.990186		0	0	0	0	0	0	0.90371	0	0
Ak8	2.25707	0.391643	1.13245	0.895946	0.925142		2.35814	0	3.22658	3.89909	3.62045	1.49235	1.80742	2.36068	1.54889
Akap1	2.07665	0.799633	1.28363	1.17901	0.881542		2.35814	6.58177	4.30211	0	0	1.49235	0.451855	1.18034	2.32333
Akap10	2.09599	-2.96291	1.42196	2.16409	0.705608		1.7686	0	0	0	1.81022	2.98471	4.51855	2.36068	5.4211
Akap11	6.09901	-0.751012	0.74194	2.12458	0.712859		5.89534	11.5181	4.30211	1.94955	1.81022	8.45667	7.68153	7.08205	6.19554
Akap12	0.0502061	0.556333	3.52771	0.113493	0.99845		0	0	0	0	0	0	0.451855	0	0
Akap13	9.81616	-0.629062	0.573513	2.69746	0.609659		12.9697	8.22721	6.45316	5.84864	9.05112	13.4312	11.7482	5.90171	14.7144
Akap17b	0.789804	0.072043	1.83732	0.791402	0.939597		1.17907	0	1.07553	1.94955	0	0.497451	0.451855	1.18034	0.774443
Akap7	0.924192	-1.27896	1.74334	0.701275	0.951172		0.589534	0	2.15105	0	0	1.49235	1.35556	1.18034	1.54889
Akap8	12.29	-0.566222	0.519655	1.56324	0.815383		10.6116	18.0999	6.45316	11.6973	5.43067	14.4261	12.6519	16.5248	14.7144
Akap8l	7.60729	0.247441	0.63291	2.39331	0.663836		7.66394	3.29089	9.67974	5.84864	14.4818	4.97451	4.9704	8.26239	9.29332
Akap9	3.89728	-1.53191	0.951899	1.00401	0.909188		1.17907	1.64544	2.15105	0	5.43067	5.96941	5.42226	7.08205	6.19554
Akip1	6.20181	0.636531	0.703179	1.86934	0.759774		3.5372	11.5181	7.52868	5.84864	5.43067	2.48726	4.9704	10.6231	3.87221
Akirin1	11.0542	-2.30035	0.635974	1.8886	0.756238		7.07441	4.93633	3.22658	5.84864	1.81022	15.9184	18.0742	24.7872	17.8122
Akirin2	7.35426	-1.72193	0.730991	3.04728	0.549945		2.94767	1.64544	2.15105	11.6973	1.81022	11.4414	9.48895	14.1641	10.8422
Akna	11.6569	-1.83547	0.582317	2.99554	0.558572		8.84301	4.93633	3.22658	5.84864	7.2409	18.9031	12.6519	17.7051	25.5566
Akr1b10	2.96285	-2.10253	1.16539	0.137991	0.997727		1.17907	1.64544	1.07553	0	1.81022	3.97961	4.06669	8.26239	4.64666
Akr1b3	18.7219	-0.433221	0.428476	1.30807	0.860005		21.8128	19.7453	19.3595	11.6973	10.8613	14.9235	24.4002	24.7872	20.91
Akr1b8	0.33708	-0.624083	3.3184	0.436406	0.979389		0	0	0	0	0	0	2.25927	0	0.774443
Akr1c12	0.371468	0.312124	2.7318	0.872029	0.928539		0.589534	0	1.07553	0	0	0	0.90371	0	0.774443
Akr1c13	1.10054	-1.59989	1.75967	1.90557	0.753123		1.17907	0	1.07553	0	0	3.48216	1.80742	2.36068	0
Akr1e1	2.03802	-0.266374	1.34591	6.29669	0.17806		2.35814	0	0	5.84864	1.81022	0.497451	0.451855	1.18034	6.19554
Akr7a5	26.7115	1.8144	0.371026	0.408539	0.981772		33.6034	36.1997	48.3987	40.9405	34.3943	11.4414	8.13339	11.8034	15.4889
Akt1	16.346	-2.15555	0.518926	4.17776	0.382482		15.9174	4.93633	7.52868	5.84864	5.43067	27.3598	26.2076	28.3282	25.5566
Akt1s1	5.31358	-0.679544	0.780162	1.01151	0.908046		6.48487	6.58177	5.37763	1.94955	1.81022	6.96432	4.9704	8.26239	5.4211
Akt2	17.501	0.0453037	0.423709	1.02232	0.906392		15.3279	13.1635	24.7371	17.5459	16.292	14.4261	15.8149	20.0658	20.1355
Akt3	4.53727	-0.976967	0.845058	2.01414	0.733158		2.94767	4.93633	1.07553	5.84864	1.81022	6.46686	4.06669	8.26239	5.4211
Aktip	1.92161	-0.5633	1.28059	1.95757	0.743564		2.94767	1.64544	2.15105	0	1.81022	1.49235	4.51855	1.18034	1.54889
AL590994.1	0.271056	1.22789	3.38872	0.327247	0.987988		0.589534	0	1.07553	0	0	0	0	0	0.774443
AL590994.3	0.160751	-0.317221	3.49708	0.201873	0.995236		0	0	0	0	0	0.994902	0.451855	0	0
AL590994.4	0.141322	-0.0390657	3.50888	0.269053	0.991723		0	0	0	0	0	0.497451	0	0	0.774443
AL603707.1	0.131149	0.524317	3.53196	0.570973	0.966234		0	0	0	0	0	0	0	1.18034	0
AL603711.1	0.0655038	1.23144	3.53373	0.139814	0.997667		0.589534	0	0	0	0	0	0	0	0
AL604065.1	0.0860492	0.554858	3.52792	0.354142	0.986056		0	0	0	0	0	0	0	0	0.774443
AL627104.1	0.0860492	0.554858	3.52792	0.354142	0.986056		0	0	0	0	0	0	0	0	0.774443
AL645602.1	0.322095	0.600093	3.14741	0.563585	0.967023		0	0	0	1.94955	0	0.497451	0.451855	0	0
AL669902.1	0.756887	0.198654	1.95115	0.14427	0.99752		0.589534	1.64544	0	1.94955	0	0.497451	1.35556	0	0.774443
AL731706.1	0.936471	-1.66954	1.85989	0.284835	0.990772		0.589534	0	0	1.94955	0	2.98471	1.35556	0	1.54889
Alad	10.8194	1.79611	0.55735	0.976133	0.913393		11.7907	21.3908	18.2839	11.6973	14.4818	2.48726	6.32597	4.72137	6.19554
Alas1	5.70641	-1.37953	0.796917	2.48902	0.646602		4.12674	3.29089	6.45316	0	3.62045	10.9439	8.13339	4.72137	10.0678
Alcam	19.7379	-1.01593	0.440091	0.814259	0.936526		16.507	16.4544	8.60421	7.79819	21.7227	21.3904	28.9187	30.6889	25.5566
Aldh16a1	14.7889	0.615785	0.458636	1.18739	0.88017		16.507	14.809	25.8126	19.4955	10.8613	9.94902	12.6519	10.6231	12.3911
Aldh18a1	4.21322	-2.72384	1.084	1.42377	0.840053		2.94767	1.64544	1.07553	0	1.81022	6.96432	6.32597	7.08205	10.0678
Aldh1a1	0.0552723	0.580731	3.52406	0.196393	0.995483		0	0	0	0	0	0.497451	0	0	0
Aldh1b1	2.46301	-1.42007	1.21045	2.41571	0.65979		0.589534	0	0	3.89909	3.62045	3.97961	2.25927	4.72137	3.09777
Aldh1l1	0.336119	2.50307	3.34223	0.604599	0.962551		0	0	1.07553	1.94955	0	0	0	0	0
Aldh2	40.7257	-0.352135	0.296657	0.29183	0.990335		40.0883	36.1997	34.4168	42.89	30.7738	42.7808	52.4152	38.9513	48.0155
Aldh3a2	4.24331	-2.12145	1.01728	2.09753	0.717826		2.94767	3.29089	0	1.94955	1.81022	6.96432	6.32597	11.8034	3.09777
Aldh3b1	8.84725	-0.178764	0.600588	3.03762	0.55155		5.30581	3.29089	9.67974	5.84864	16.292	7.95922	5.87411	12.9838	12.3911
Aldh4a1	2.85248	-0.486024	1.01547	0.538368	0.96966		2.35814	1.64544	4.30211	1.94955	1.81022	2.98471	3.61484	2.36068	4.64666
Aldh5a1	0.0860492	0.554858	3.52792	0.354142	0.986056		0	0	0	0	0	0	0	0	0.774443
Aldh6a1	0.608786	-0.549551	2.16495	0.96798	0.914612		0.589534	0	0	0	1.81022	0.497451	1.80742	0	0.774443
Aldh7a1	1.65437	-0.011131	1.34318	2.32383	0.676433		2.35814	0	2.15105	1.94955	1.81022	0.497451	1.80742	3.54102	0.774443
Aldh8a1	0.0552723	0.580731	3.52406	0.196393	0.995483		0	0	0	0	0	0.497451	0	0	0
Aldh9a1	12.5787	-1.11058	0.538411	2.64419	0.619016		7.66394	16.4544	10.7553	1.94955	5.43067	18.9031	18.5261	14.1641	19.3611
Aldoart1	0.0502061	0.556333	3.52771	0.113493	0.99845		0	0	0	0	0	0	0.451855	0	0
Aldoc	2.60218	-0.196656	1.10477	1.36472	0.850302		4.71627	1.64544	2.15105	0	5.43067	2.98471	1.80742	2.36068	2.32333
Alg1	3.79942	-1.6674	0.982153	0.535625	0.969942		1.17907	1.64544	4.30211	0	1.81022	7.46177	4.51855	7.08205	6.19554
Alg10b	6.03458	-0.686346	0.710378	0.470739	0.976286		4.71627	4.93633	3.22658	3.89909	7.2409	7.95922	6.32597	8.26239	7.74443
Alg11	0.912037	-1.09462	1.8808	1.72667	0.785868		1.17907	1.64544	0	0	0	1.49235	2.71113	1.18034	0
Alg12	1.05857	-1.99736	1.75312	1.37809	0.847994		0	1.64544	0	0	0	2.48726	2.25927	2.36068	0.774443
Alg13	2.21377	-0.568988	1.18901	2.48446	0.64742		0.589534	1.64544	0	5.84864	1.81022	1.9898	1.80742	2.36068	3.87221
Alg14	1.43039	-0.679705	1.41581	0.415864	0.981158		1.17907	1.64544	1.07553	1.94955	0	2.48726	1.80742	1.18034	1.54889
Alg2	2.00275	-2.78827	1.44381	2.67054	0.614379		2.94767	1.64544	0	0	0	2.98471	2.25927	3.54102	4.64666
Alg3	3.67185	0.119814	0.89109	1.19094	0.879589		3.5372	6.58177	3.22658	1.94955	3.62045	4.97451	4.06669	3.54102	1.54889
Alg5	10.5617	0.606023	0.525745	1.98871	0.737836		7.66394	13.1635	11.8308	19.4955	9.05112	9.45157	9.94081	8.26239	6.19554
Alg6	1.53316	0.0265191	1.37743	0.632437	0.959392		0.589534	3.29089	0	1.94955	1.81022	1.49235	2.71113	1.18034	0.774443
Alg8	7.49982	0.330462	0.642703	3.76109	0.439303		5.89534	4.93633	9.67974	17.5459	3.62045	7.95922	7.68153	7.08205	3.09777
Alg9	1.51897	-0.0246034	1.36827	2.45555	0.652612		1.7686	1.64544	2.15105	0	1.81022	2.48726	2.25927	0	1.54889
Alkbh1	2.93258	0.0283459	0.989973	1.7756	0.776943		1.17907	4.93633	3.22658	1.94955	1.81022	4.97451	0.90371	3.54102	3.87221
Alkbh2	0.665757	-2.12473	2.05373	0.441204	0.978967		0.589534	0	0	0	0	0.994902	0.90371	1.18034	2.32333
Alkbh3	3.98436	-0.707487	0.877531	0.096368	0.998876		2.94767	3.29089	2.15105	5.84864	1.81022	4.97451	5.87411	3.54102	5.4211
Alkbh4	2.15687	-1.07216	1.24612	4.98438	0.288904		0	4.93633	2.15105	0	0	3.97961	4.06669	1.18034	3.09777
Alkbh5	9.98574	-1.03534	0.587206	1.02229	0.906398		8.84301	11.5181	4.30211	3.89909	7.2409	11.9388	11.2964	15.3444	15.4889
Alkbh6	4.34976	-0.268865	0.818186	0.352558	0.986174		3.5372	4.93633	5.37763	1.94955	3.62045	5.96941	3.61484	4.72137	5.4211
Alkbh7	6.34353	0.687836	0.712992	0.712713	0.949752		9.43254	6.58177	9.67974	1.94955	10.8613	2.98471	5.42226	7.08205	3.09777
Alkbh8	1.20866	-1.12918	1.56292	1.00088	0.909663		1.17907	1.64544	1.07553	0	0	2.48726	1.35556	2.36068	0.774443
Alms1	1.01835	-0.602447	1.74145	0.204201	0.995129		1.17907	1.64544	1.07553	0	0	0	1.35556	2.36068	1.54889
Alox12	0.0552723	0.580731	3.52406	0.196393	0.995483		0	0	0	0	0	0.497451	0	0	0
Alox5	0.844763	-1.50345	1.81133	1.09284	0.895406		0.589534	0	1.07553	0	0	0.497451	2.71113	1.18034	1.54889
Alpk1	1.57807	0.960667	1.37718	0.147789	0.997401		2.35814	3.29089	2.15105	1.94955	0	0.497451	0.451855	1.18034	2.32333
Alpk3	0.0655038	1.23144	3.53373	0.139814	0.997667		0.589534	0	0	0	0	0	0	0	0
Als2	2.03046	-0.823427	1.27159	1.33207	0.855911		0.589534	0	2.15105	0	5.43067	3.48216	2.71113	2.36068	1.54889
Als2cl	1.03389	-1.56737	1.7151	1.99966	0.735821		0.589534	0	0	0	1.81022	0.994902	0.451855	2.36068	3.09777
Alyref2	3.79866	0.198119	0.888933	1.06036	0.90051		4.71627	4.93633	2.15105	7.79819	1.81022	4.47706	3.61484	2.36068	2.32333
Amacr	0.343578	0.332145	3.02005	1.06608	0.899616		0	1.64544	0	0	0	0.994902	0.451855	0	0
Ambra1	4.89096	-0.38887	0.791481	0.389825	0.983301		5.30581	1.64544	4.30211	3.89909	7.2409	6.96432	4.51855	4.72137	5.4211
Amd1	5.66743	-1.5532	0.821666	3.48929	0.479508		2.94767	4.93633	0	1.94955	7.2409	9.45157	4.9704	9.44273	10.0678
Amd2	7.69178	2.90775	0.78303	0.364929	0.985246		15.3279	18.0999	8.60421	13.6468	7.2409	0.497451	2.71113	0	3.09777
Amdhd1	0.368169	1.20168	3.01213	0.837098	0.933407		0.589534	0	0	1.94955	0	0	0	0	0.774443
Amdhd2	19.9505	1.91416	0.421413	4.68417	0.321264		17.686	52.6542	25.8126	21.445	28.9636	8.95412	10.3927	5.90171	7.74443
Amer1	0.386766	0.574803	2.71445	0.850479	0.931555		1.17907	0	1.07553	0	0	0	0.451855	0	0.774443
Amfr	29.7298	-0.0050228	0.346708	2.27978	0.684452		29.4767	23.0362	17.2084	44.8396	38.0147	29.3496	27.1113	28.3282	30.2033
Amh	0.0655038	1.23144	3.53373	0.139814	0.997667		0.589534	0	0	0	0	0	0	0	0
Amhr2	0.131149	0.524317	3.53196	0.570973	0.966234		0	0	0	0	0	0	0	1.18034	0
Amigo1	0.890216	-0.343687	1.73574	1.08118	0.897247		1.17907	0	1.07553	1.94955	0	0.497451	1.35556	1.18034	0.774443
Amigo3	0.381601	0.160999	2.73399	0.230303	0.993858		0.589534	0	1.07553	0	0	0.994902	0	0	0.774443
Ammecr1	0.997014	-0.143053	1.87379	2.4555	0.652621		0	1.64544	1.07553	0	0	0	2.71113	3.54102	0
Ammecr1l	1.19009	-2.95908	1.69379	0.850575	0.931542		0.589534	0	0	0	0	2.98471	0.90371	2.36068	3.87221
Amn1	1.08934	-2.13738	1.73537	0.962223	0.915469		0	1.64544	0	0	0	1.9898	2.25927	2.36068	1.54889
Amot	0.947459	0.214941	1.83562	0.91097	0.922982		2.94767	1.64544	1.07553	0	0	0	0.90371	1.18034	0.774443
Amotl2	0.100412	0.255999	3.51218	0.294189	0.990186		0	0	0	0	0	0	0.90371	0	0
Ampd2	3.49395	-2.26558	1.16161	2.19299	0.700313		4.71627	1.64544	0	3.89909	0	4.47706	5.42226	3.54102	7.74443
Ampd3	1.83669	-1.28786	1.36888	1.0596	0.900628		2.35814	0	1.07553	0	3.62045	2.98471	1.80742	2.36068	2.32333
Amt	0.186461	-0.346606	3.49885	0.245964	0.99303		0	0	0	0	0	0	0.90371	0	0.774443
Amz1	15.93	-1.09011	0.467081	0.39221	0.98311		11.2011	8.22721	12.9063	13.6468	7.2409	24.3751	18.5261	24.7872	22.4588
Amz2	6.98361	0.0552987	0.680064	2.23191	0.693191		10.6116	3.29089	7.52868	13.6468	3.62045	4.97451	9.0371	4.72137	5.4211
Anapc1	7.61902	-1.2774	0.691614	2.37527	0.667101		8.84301	3.29089	4.30211	7.79819	1.81022	8.45667	6.77782	11.8034	15.4889
Anapc10	2.85836	-1.03287	1.07912	1.30824	0.859975		2.35814	3.29089	1.07553	3.89909	0	2.48726	3.61484	5.90171	3.09777
Anapc13	14.0567	0.886028	0.495397	1.27638	0.865369		17.0965	13.1635	21.5105	17.5459	16.292	12.4363	4.9704	16.5248	6.96999
Anapc15	9.83561	1.04489	0.554664	3.39925	0.493362		9.43254	6.58177	18.2839	17.5459	10.8613	3.48216	6.32597	8.26239	7.74443
Anapc16	12.6504	0.775556	0.508907	0.822124	0.935458		10.0221	11.5181	18.2839	11.6973	23.5329	11.9388	7.68153	12.9838	6.19554
Anapc2	12.3432	-0.082592	0.499121	0.235197	0.993604		14.1488	9.87266	13.9818	11.6973	10.8613	12.9337	9.48895	14.1641	13.94
Anapc4	7.41141	0.230779	0.625988	0.397096	0.982714		8.25348	6.58177	9.67974	7.79819	7.2409	7.46177	6.77782	8.26239	4.64666
Anapc7	8.26137	0.5989	0.601763	1.28568	0.863801		14.1488	9.87266	9.67974	5.84864	10.8613	5.47196	6.77782	4.72137	6.96999
Ang	0.373234	0.958538	3.17223	1.74801	0.781978		0	0	0	0	1.81022	0	0	0	1.54889
Angel1	0.424064	-0.816254	2.79262	0.8337	0.933874		0.589534	0	0	0	0	0	0.90371	0	2.32333
Angel2	5.57972	-0.495399	0.756687	2.28092	0.684245		7.07441	6.58177	1.07553	5.84864	5.43067	7.95922	4.51855	7.08205	4.64666
Angpt1	0.922089	1.95069	1.892	1.30458	0.860597		1.17907	3.29089	2.15105	0	0	0.497451	0	1.18034	0
Angptl2	1.73516	-3.46336	1.5325	1.3394	0.854655		0.589534	0	0	0	0	2.48726	3.61484	1.18034	7.74443
Angptl4	0.272511	-0.624009	3.48767	0.343864	0.986809		0	0	0	0	0	0	0.90371	0	1.54889
Angptl6	0.354716	1.50811	2.99597	0.926375	0.920747		0.589534	0	2.15105	0	0	0	0.451855	0	0
Ank	7.39322	-1.00495	0.679989	2.43905	0.655583		10.0221	6.58177	3.22658	3.89909	5.43067	12.4363	11.2964	5.90171	7.74443
Ank1	1.21137	-0.200842	1.54611	2.93202	0.569265		0	0	1.07553	1.94955	1.81022	0.497451	3.61484	1.18034	0.774443
Ankfy1	14.1383	0.375321	0.462057	0.965182	0.915029		15.9174	16.4544	16.1329	15.5964	14.4818	16.4159	13.1038	10.6231	8.51887
Ankhd1	1.24388	-0.17686	1.51007	0.735376	0.946896		0.589534	1.64544	1.07553	0	1.81022	2.48726	0.451855	2.36068	0.774443
Ankib1	6.78041	0.21011	0.649248	1.57002	0.81417		5.30581	4.93633	6.45316	11.6973	7.2409	4.47706	7.22968	8.26239	5.4211
Ankle1	1.22083	1.04919	1.60917	2.87611	0.578768		0	0	3.22658	1.94955	1.81022	0.497451	0	1.18034	2.32333
Ankle2	13.1796	-0.347652	0.498551	3.55517	0.469539		7.66394	6.58177	7.52868	25.3441	12.6716	12.4363	14.0075	15.3444	17.0377
Ankmy2	4.46504	-0.669892	0.857793	1.18663	0.880295		7.07441	1.64544	2.15105	5.84864	3.62045	7.46177	4.9704	3.54102	3.87221
Ankra2	3.50693	0.262799	0.909656	0.411637	0.981513		2.94767	1.64544	3.22658	7.79819	3.62045	4.47706	3.16298	2.36068	2.32333
Ankrd10	12.3077	0.938164	0.502643	4.32169	0.364217		14.7383	19.7453	20.435	9.74773	12.6716	13.4312	9.48895	3.54102	6.96999
Ankrd11	8.69621	-0.687607	0.610136	1.03113	0.905039		8.25348	3.29089	6.45316	9.74773	7.2409	11.9388	6.77782	10.6231	13.94
Ankrd12	2.07949	-0.921993	1.23149	0.402685	0.982257		2.35814	1.64544	2.15105	1.94955	0	1.9898	3.16298	2.36068	3.09777
Ankrd13b	1.11941	-0.251924	1.76041	4.40909	0.353464		1.7686	0	0	3.89909	0	0.497451	0	2.36068	1.54889
Ankrd13c	7.17149	-0.851788	0.682664	2.97497	0.562022		10.6116	4.93633	6.45316	3.89909	3.62045	8.45667	11.2964	10.6231	4.64666
Ankrd13d	0.793043	-0.806383	1.91822	1.32618	0.856919		0.589534	0	2.15105	0	0	1.49235	1.35556	0	1.54889
Ankrd16	2.2737	-0.128053	1.15753	0.602562	0.962779		1.7686	4.93633	1.07553	0	3.62045	1.9898	3.16298	2.36068	1.54889
Ankrd17	6.09266	-0.745213	0.719128	0.992777	0.910889		4.71627	3.29089	3.22658	3.89909	9.05112	9.45157	6.77782	5.90171	8.51887
Ankrd22	0.155685	-0.332704	3.49546	0.168316	0.996651		0	0	0	0	0	0.497451	0.90371	0	0
Ankrd23	0.270121	0.812425	3.47406	1.02546	0.905911		0	0	1.07553	0	0	0	1.35556	0	0
Ankrd24	0.191528	-0.625247	3.48578	0.0804802	0.999212		0	0	0	0	0	0.497451	0.451855	0	0.774443
Ankrd26	0.11571	0.556423	3.52771	0.2211	0.994322		0.589534	0	0	0	0	0	0.451855	0	0
Ankrd27	5.44691	-0.326345	0.763174	1.41047	0.842373		7.07441	8.22721	4.30211	1.94955	3.62045	6.46686	4.06669	9.44273	3.87221
Ankrd28	5.1932	0.408917	0.742438	1.12409	0.890432		5.30581	6.58177	7.52868	3.89909	5.43067	6.46686	4.51855	2.36068	4.64666
Ankrd33b	0.709798	0.693618	2.0105	1.94013	0.746769		1.7686	1.64544	1.07553	0	0	0.994902	0.90371	0	0
Ankrd37	0.407961	0.599098	2.66027	1.19596	0.878763		0.589534	0	0	0	1.81022	0.497451	0	0	0.774443
Ankrd39	1.63537	0.100752	1.29871	0.908626	0.92332		0.589534	1.64544	2.15105	0	3.62045	0.994902	1.80742	2.36068	1.54889
Ankrd40	6.95465	-0.971037	0.680746	0.604076	0.96261		4.71627	4.93633	5.37763	7.79819	1.81022	9.45157	8.58524	10.6231	9.29332
Ankrd44	7.87806	-0.957516	0.659446	0.797045	0.938844		4.12674	8.22721	2.15105	5.84864	7.2409	12.9337	13.5556	10.6231	6.19554
Ankrd46	2.36965	-1.08428	1.22608	2.42781	0.657607		0.589534	0	6.45316	1.94955	0	2.98471	2.71113	3.54102	3.09777
Ankrd49	4.13636	-1.00072	0.954682	4.31314	0.365283		5.89534	0	4.30211	7.79819	0	3.48216	3.61484	8.26239	3.87221
Ankrd50	2.34066	-0.490631	1.17711	0.631802	0.959465		2.35814	4.93633	0	1.94955	1.81022	2.48726	3.61484	2.36068	1.54889
Ankrd52	0.629332	-0.90815	2.13841	0.203028	0.995183		0.589534	0	0	1.94955	0	0.994902	1.35556	0	0.774443
Ankrd54	8.80181	1.07886	0.586385	1.06653	0.899545		11.2011	11.5181	13.9818	15.5964	5.43067	5.96941	4.9704	5.90171	4.64666
Ankrd55	0.857285	-2.53353	1.88254	0.500069	0.973494		0.589534	0	0	0	0	1.49235	1.35556	1.18034	3.09777
Ankrd6	0.0860492	0.554858	3.52792	0.354142	0.986056		0	0	0	0	0	0	0	0	0.774443
Ankrd63	0.0502061	0.556333	3.52771	0.113493	0.99845		0	0	0	0	0	0	0.451855	0	0
Ankrd9	1.02255	0.375976	1.76502	4.10296	0.392251		0	0	0	1.94955	3.62045	0	0.90371	1.18034	1.54889
Anks1	3.19112	-0.541539	1.00645	1.60074	0.80866		2.94767	4.93633	2.15105	0	3.62045	1.9898	4.51855	2.36068	6.19554
Anks3	5.17028	0.609848	0.740119	0.365929	0.98517		5.30581	6.58177	5.37763	5.84864	7.2409	4.97451	4.9704	2.36068	3.87221
Anks6	0.0552723	0.580731	3.52406	0.196393	0.995483		0	0	0	0	0	0.497451	0	0	0
Ankzf1	2.69677	-0.407982	1.0908	1.24144	0.87123		4.12674	0	2.15105	5.84864	1.81022	2.48726	3.16298	2.36068	2.32333
Anln	1.19457	-2.96886	1.75292	0.695339	0.951902		0	0	0	0	0	0.497451	3.61484	3.54102	3.09777
Ano10	3.47463	-0.504545	0.973333	1.35138	0.852599		4.71627	1.64544	3.22658	1.94955	3.62045	5.47196	6.32597	3.54102	0.774443
Ano6	2.13571	-4.03601	1.45814	0.181991	0.996103		0	0	0	0	0	4.47706	4.9704	5.90171	3.87221
Ano8	1.62431	0.198405	1.32565	1.10774	0.893043		1.7686	1.64544	3.22658	1.94955	0	1.9898	0.90371	2.36068	0.774443
Anp32a	13.621	-1.57083	0.521	1.47385	0.831263		11.2011	8.22721	6.45316	5.84864	7.2409	24.3751	16.7186	20.0658	22.4588
Anp32e	17.2327	-1.56918	0.465758	0.589549	0.964218		10.6116	11.5181	6.45316	9.74773	9.05112	24.3751	24.4002	29.5085	29.4288
Anpep	23.2553	-1.35041	0.398863	1.10475	0.893518		12.3802	16.4544	16.1329	7.79819	14.4818	33.8267	32.9854	31.8692	43.3688
Antkmt	23.9061	0.696176	0.364257	1.07607	0.89805		22.4023	23.0362	34.4168	33.1423	28.9636	20.8929	19.8816	17.7051	14.7144
Antxr1	0.0502061	0.556333	3.52771	0.113493	0.99845		0	0	0	0	0	0	0.451855	0	0
Antxr2	7.40508	-1.80893	0.751127	3.4291	0.48874		7.07441	1.64544	4.30211	0	7.2409	6.96432	8.58524	15.3444	15.4889
Anxa11	17.2394	-0.0917994	0.440023	0.64794	0.95759		16.507	11.5181	25.8126	11.6973	18.1022	17.9082	15.3631	18.8855	19.3611
Anxa3	10.2469	0.0796145	0.536897	1.06131	0.900361		11.2011	13.1635	9.67974	9.74773	9.05112	13.4312	9.94081	8.26239	7.74443
Anxa4	17.2207	-1.69272	0.471503	1.9069	0.752878		5.89534	13.1635	7.52868	5.84864	9.05112	28.3547	29.8224	21.2461	34.0755
Anxa7	24.1913	-0.587699	0.381491	0.922657	0.921288		23.5814	14.809	26.8882	15.5964	19.9125	34.8216	29.3706	29.5085	23.2333
Anxa9	0.235213	1.23187	3.49425	0.469015	0.976446		0.589534	0	1.07553	0	0	0	0.451855	0	0
Aoah	1.34434	-0.452407	1.44061	0.976227	0.913379		1.17907	1.64544	1.07553	1.94955	0	2.48726	1.80742	1.18034	0.774443
Aoc2	0.186461	-0.346606	3.49885	0.245964	0.99303		0	0	0	0	0	0	0.90371	0	0.774443
Aopep	6.46869	1.26334	0.672032	1.16362	0.884051		5.30581	6.58177	11.8308	11.6973	7.2409	2.98471	3.61484	3.54102	5.4211
Aox2	0.287185	1.23119	3.49425	1.12835	0.889748		0	0	0	0	1.81022	0	0	0	0.774443
Ap1ar	5.94221	0.300295	0.709267	2.19646	0.699677		6.48487	4.93633	5.37763	5.84864	9.05112	6.96432	3.16298	2.36068	9.29332
Ap1b1	21.5221	0.619291	0.388419	0.534068	0.970101		20.6337	24.6816	22.5861	31.1928	27.1534	17.9082	20.3335	10.6231	18.5866
Ap1g1	12.9519	-0.120676	0.50348	3.60092	0.4627		10.6116	23.0362	16.1329	3.89909	9.05112	14.9235	16.2668	11.8034	10.8422
Ap1g2	5.51001	-0.34863	0.797765	3.08525	0.543662		12.3802	4.93633	3.22658	0	9.05112	4.47706	4.9704	5.90171	4.64666
Ap1m1	11.5713	-1.34531	0.565235	5.27665	0.260071		15.9174	6.58177	8.60421	5.84864	3.62045	19.4006	17.1705	17.7051	9.29332
Ap1m2	0.786152	-1.08334	1.87847	1.54617	0.818433		0.589534	0	0	1.94955	0	0.497451	0.90371	2.36068	0.774443
Ap1s1	25.1295	1.65424	0.364907	4.81243	0.30709		17.686	32.9089	44.0966	37.0414	43.4454	13.4312	9.48895	11.8034	16.2633
Ap1s2	12.248	-1.16048	0.578265	3.94812	0.413072		17.686	9.87266	13.9818	0	5.43067	13.4312	16.2668	16.5248	17.0377
Ap1s3	13.036	-1.59073	0.553109	5.56675	0.233924		12.3802	6.58177	9.67974	0	10.8613	22.3853	23.4965	11.8034	20.1355
Ap2a1	6.83017	-0.846204	0.692132	0.18391	0.996023		4.12674	4.93633	3.22658	9.74773	3.62045	9.45157	10.3927	5.90171	10.0678
Ap2a2	26.5646	1.05871	0.343803	4.60808	0.329923		20.0442	27.9725	38.7189	48.7387	32.584	15.421	15.3631	22.4265	17.8122
Ap2b1	18.5758	-0.22922	0.435654	1.44348	0.836604		15.3279	6.58177	17.2084	23.3946	25.3431	19.898	23.9483	15.3444	20.1355
Ap3b1	12.2394	-0.959535	0.543087	2.79766	0.592237		10.0221	16.4544	5.37763	5.84864	7.2409	16.4159	18.0742	8.26239	22.4588
Ap3d1	20.5979	-0.0542984	0.393695	0.275279	0.991354		17.0965	16.4544	18.2839	23.3946	25.3431	24.3751	22.5927	17.7051	20.1355
Ap3m1	6.55912	-0.869022	0.694881	0.726434	0.948029		4.71627	6.58177	3.22658	3.89909	5.43067	9.94902	7.22968	11.8034	6.19554
Ap3m2	1.08608	-1.43196	1.70592	0.442957	0.978811		0.589534	0	2.15105	0	0	1.49235	0.451855	3.54102	1.54889
Ap3s1	14.1011	-0.866293	0.486595	0.314618	0.988851		12.9697	13.1635	8.60421	11.6973	7.2409	16.4159	18.9779	17.7051	20.1355
Ap3s2	6.23866	-0.39469	0.724253	0.496895	0.973803		7.07441	4.93633	3.22658	3.89909	9.05112	7.46177	6.77782	10.6231	3.09777
Ap4b1	1.73125	-1.85062	1.42016	0.879282	0.927514		0.589534	0	1.07553	0	1.81022	1.49235	3.16298	5.90171	1.54889
Ap4e1	0.186421	-0.0629533	3.51248	0.403244	0.98221		0	0	0	0	0	0.497451	0	1.18034	0
Ap4m1	2.8611	-0.969876	1.05169	1.28557	0.863819		1.17907	0	3.22658	1.94955	3.62045	2.98471	4.9704	4.72137	3.09777
Ap4s1	7.11997	-0.103764	0.689502	0.67556	0.954308		8.84301	8.22721	12.9063	1.94955	3.62045	5.47196	5.87411	9.44273	7.74443
Ap5b1	4.21044	0.427212	0.82201	1.97541	0.740283		3.5372	1.64544	5.37763	5.84864	7.2409	1.9898	4.06669	3.54102	4.64666
Ap5m1	2.44067	-0.263825	1.13178	1.13389	0.888858		2.35814	4.93633	1.07553	3.89909	0	3.48216	2.71113	1.18034	2.32333
Ap5s1	4.26571	1.12621	0.883083	0.0828345	0.999166		5.30581	1.64544	9.67974	7.79819	3.62045	3.97961	0.90371	2.36068	3.09777
Ap5z1	3.25165	-0.453019	0.969335	1.11481	0.891915		4.71627	3.29089	3.22658	1.94955	1.81022	2.98471	5.42226	3.54102	2.32333
Apaf1	8.2884	0.852741	0.644087	1.39193	0.845596		7.07441	11.5181	5.37763	13.6468	12.6716	9.45157	8.58524	4.72137	1.54889
Apba1	1.91563	-1.37259	1.37377	0.797069	0.938841		2.35814	0	1.07553	0	3.62045	2.98471	4.06669	2.36068	0.774443
Apba3	2.02799	-2.25047	1.37727	0.317938	0.988627		1.17907	0	1.07553	1.94955	0	4.97451	3.61484	2.36068	3.09777
Apbb1ip	21.1885	0.0432411	0.383809	0.730259	0.947546		24.1709	23.0362	21.5105	23.3946	16.292	22.8827	17.6223	22.4265	19.3611
Apbb2	0.619723	-1.96513	2.35841	0.423698	0.980491		0	0	0	0	0	0.994902	2.25927	0	2.32333
Apbb3	1.45529	0.429083	1.36018	0.322872	0.98829		1.7686	1.64544	1.07553	1.94955	1.81022	1.9898	0.90371	1.18034	0.774443
Apc	4.59905	-0.510785	0.80068	0.0605117	0.999551		3.5372	4.93633	3.22658	3.89909	3.62045	4.47706	6.77782	4.72137	6.19554
Apc2	0.131149	0.524317	3.53196	0.570973	0.966234		0	0	0	0	0	0	0	1.18034	0
Apcdd1	0.378008	-0.392725	2.95028	0.914188	0.922517		0.589534	0	0	0	0	0	0.451855	2.36068	0
Apeh	11.7384	0.917412	0.51402	2.34769	0.6721		13.5593	21.3908	13.9818	7.79819	16.292	8.95412	4.9704	7.08205	11.6166
Apex1	14.5771	0.0889259	0.487283	2.60559	0.625834		18.8651	9.87266	22.5861	13.6468	10.8613	20.3955	12.6519	15.3444	6.96999
Apex2	1.55701	-0.276326	1.35333	1.79351	0.773669		0.589534	3.29089	1.07553	1.94955	0	1.9898	3.16298	1.18034	0.774443
Aph1a	15.8465	-1.00083	0.460701	1.33319	0.85572		12.9697	13.1635	7.52868	11.6973	10.8613	20.3955	17.1705	27.1479	21.6844
Aph1b	1.78949	-0.658078	1.34732	3.16197	0.531095		3.5372	1.64544	3.22658	0	0	3.48216	2.25927	1.18034	0.774443
Aph1c	11.1714	0.107967	0.517717	0.876773	0.927869		12.3802	11.5181	10.7553	13.6468	9.05112	8.95412	7.68153	14.1641	12.3911
Api5	14.8732	-0.695683	0.468097	0.885662	0.926609		14.7383	9.87266	9.67974	15.5964	10.8613	21.8878	17.6223	18.8855	14.7144
Apip	6.60349	-0.125975	0.672781	1.16946	0.883101		7.66394	6.58177	6.45316	3.89909	7.2409	4.97451	5.87411	5.90171	10.8422
Aplf	0.456894	1.23193	2.51232	1.70267	0.790232		0	0	1.07553	0	1.81022	0	0.451855	0	0.774443
Apln	0.0552723	0.580731	3.52406	0.196393	0.995483		0	0	0	0	0	0.497451	0	0	0
Aplp2	9.00757	-0.286457	0.594637	3.57475	0.466604		8.25348	13.1635	6.45316	3.89909	9.05112	9.45157	9.0371	4.72137	17.0377
Apmap	4.36043	-1.0229	0.877631	1.86196	0.761129		7.07441	1.64544	3.22658	1.94955	3.62045	5.96941	4.06669	4.72137	6.96999
Apoa2	0.0655038	1.23144	3.53373	0.139814	0.997667		0.589534	0	0	0	0	0	0	0	0
Apobec1	8.89375	-0.532386	0.598687	3.24193	0.518186		4.12674	8.22721	4.30211	13.6468	5.43067	5.96941	11.7482	16.5248	10.0678
Apobec3	39.3152	0.212673	0.292293	1.41232	0.84205		37.7302	47.7178	40.87	42.89	38.0147	37.8063	41.5707	40.1316	27.1055
Apobr	8.37988	-1.28188	0.652307	1.71982	0.787114		2.35814	11.5181	3.22658	3.89909	3.62045	10.4465	12.6519	12.9838	14.7144
Apoc1	0.0502061	0.556333	3.52771	0.113493	0.99845		0	0	0	0	0	0	0.451855	0	0
Apoc2	1.82961	0.423495	1.3311	3.61581	0.460489		1.7686	3.29089	5.37763	0	0	0.994902	2.71113	0	2.32333
Apod	1.55239	2.17631	1.41589	1.08078	0.897309		1.17907	1.64544	3.22658	1.94955	3.62045	0.994902	1.35556	0	0
Apof	1.52069	1.9975	1.4892	2.72981	0.604008		1.17907	1.64544	4.30211	0	3.62045	2.48726	0.451855	0	0
Apol10b	0.105478	-0.0379606	3.5087	0.0949498	0.998908		0	0	0	0	0	0.497451	0.451855	0	0
Apol6	0.0860492	0.554858	3.52792	0.354142	0.986056		0	0	0	0	0	0	0	0	0.774443
Apol7b	0.191528	-0.625247	3.48578	0.0804802	0.999212		0	0	0	0	0	0.497451	0.451855	0	0.774443
Apol7c	21.3377	0.653398	0.411186	12.6033	0.0133858		22.9918	31.2634	30.1147	23.3946	14.4818	30.842	21.689	14.1641	3.09777
Apol7e	0.321912	1.26012	3.16759	0.465883	0.976736		0.589534	0	0	0	1.81022	0.497451	0	0	0
Apold1	0.119503	1.90859	3.52802	0.242736	0.993205		0	0	1.07553	0	0	0	0	0	0
Apoo	1.77834	-1.0141	1.32446	1.37316	0.848846		0.589534	3.29089	2.15105	0	0	3.48216	1.80742	2.36068	2.32333
Apool	7.48092	0.649263	0.628684	0.803581	0.937967		9.43254	8.22721	11.8308	5.84864	9.05112	3.97961	7.22968	7.08205	4.64666
App	11.6105	-1.56485	0.575814	2.52885	0.639477		4.71627	14.809	4.30211	3.89909	3.62045	20.3955	14.9112	17.7051	20.1355
Appbp2	6.54184	0.464183	0.713542	0.540512	0.969439		4.71627	4.93633	4.30211	11.6973	10.8613	7.46177	9.0371	3.54102	2.32333
Appbp2os	0.0502061	0.556333	3.52771	0.113493	0.99845		0	0	0	0	0	0	0.451855	0	0
Appl1	6.21021	-0.0748243	0.727059	3.01723	0.554946		11.7907	9.87266	3.22658	1.94955	7.2409	4.97451	6.32597	3.54102	6.96999
Appl2	3.16232	-1.21605	1.0153	0.136019	0.99779		1.7686	1.64544	1.07553	1.94955	3.62045	3.97961	5.42226	5.90171	3.09777
Aprt	33.4893	0.917927	0.320153	2.32268	0.676643		33.0139	34.5543	43.0211	60.436	38.0147	19.4006	20.3335	22.4265	30.2033
Aptx	3.59266	0.429545	0.911184	0.196983	0.995457		4.71627	1.64544	3.22658	5.84864	5.43067	4.47706	2.71113	1.18034	3.09777
Aqp1	0.131149	0.524317	3.53196	0.570973	0.966234		0	0	0	0	0	0	0	1.18034	0
Aqp11	0.169709	1.23178	3.49425	0.598897	0.963186		0	0	1.07553	0	0	0	0.451855	0	0
Aqp3	0.136255	-0.0559318	3.51215	0.202822	0.995193		0	0	0	0	0	0	0.451855	0	0.774443
Aqr	3.75659	-2.72028	1.14986	0.602301	0.962808		1.7686	0	1.07553	3.89909	0	6.46686	8.13339	4.72137	7.74443
Araf	10.949	-0.127887	0.519646	0.772371	0.942113		8.25348	8.22721	11.8308	11.6973	10.8613	10.4465	9.48895	15.3444	12.3911
Arap1	9.84063	-1.41559	0.599141	1.81022	0.770612		5.89534	4.93633	4.30211	5.84864	7.2409	16.4159	10.8445	10.6231	22.4588
Arap2	1.21917	-2.09665	1.64909	0.858234	0.930475		1.17907	0	0	1.94955	0	2.98471	1.35556	1.18034	2.32333
Arap3	0.217198	-0.0804251	3.51594	0.469258	0.976424		0	0	0	0	0	0	0	1.18034	0.774443
Arc	0.452691	-1.61114	2.68006	0.258391	0.992339		0	0	0	0	0	1.49235	1.80742	0	0.774443
Arcn1	15.4525	-1.50625	0.526926	3.06962	0.546244		12.9697	16.4544	5.37763	11.6973	1.81022	26.3649	28.9187	15.3444	20.1355
Arel1	3.62395	-0.803825	0.988304	4.71762	0.317518		5.30581	4.93633	3.22658	0	1.81022	8.45667	4.9704	2.36068	1.54889
Arf2	6.56695	1.65401	0.695996	0.682307	0.953493		8.25348	14.809	10.7553	3.89909	9.05112	2.98471	2.71113	3.54102	3.09777
Arf3	40.6084	0.675509	0.298261	4.14191	0.387141		35.372	29.618	52.7008	56.5369	66.9783	28.3547	37.0521	24.7872	34.0755
Arf4	17.8397	-1.29637	0.453626	1.30651	0.86027		10.0221	9.87266	11.8308	9.74773	10.8613	33.3292	24.4002	34.2299	16.2633
Arf6	16.0856	-3.26078	0.637405	5.92005	0.205199		11.2011	3.29089	3.22658	1.94955	3.62045	32.3343	23.4965	37.7709	27.8799
Arfgap1	9.28025	1.0249	0.587636	1.03901	0.903824		11.2011	6.58177	11.8308	15.5964	14.4818	6.46686	6.77782	8.26239	2.32333
Arfgap2	12.7194	1.07039	0.497033	1.08609	0.896472		12.9697	16.4544	15.0574	23.3946	14.4818	9.94902	10.8445	5.90171	5.4211
Arfgap3	2.71596	-2.06467	2.44651	1.23666	0.872026		0	3.29089	0	3.89909	0	7.95922	5.42226	0	3.87221
Arfgef1	8.3637	-1.73306	0.715199	2.85675	0.582078		4.71627	6.58177	0	1.94955	10.8613	11.4414	10.8445	14.1641	14.7144
Arfgef2	4.03402	-0.991038	0.927044	0.688501	0.952739		4.12674	6.58177	1.07553	1.94955	1.81022	3.48216	6.32597	7.08205	3.87221
Arfgef3	0.262298	0.375305	3.49942	0.852232	0.931312		0	0	0	0	0	0	0	2.36068	0
Arfip1	4.78518	-0.533356	0.805995	0.62115	0.960685		4.71627	6.58177	5.37763	1.94955	1.81022	5.96941	4.9704	4.72137	6.96999
Arfip2	8.7145	0.289578	0.592187	2.3568	0.670448		6.48487	4.93633	12.9063	9.74773	10.8613	5.47196	4.9704	12.9838	10.0678
Arfrp1	9.18257	0.536549	0.583368	0.61915	0.960912		7.07441	13.1635	7.52868	15.5964	9.05112	6.46686	11.2964	4.72137	7.74443
Arg2	0.636071	0.615447	2.12651	2.165	0.705441		0	1.64544	0	1.94955	0	0.497451	0.451855	1.18034	0
Arglu1	17.1591	-0.0518629	0.448364	0.763108	0.943324		14.1488	14.809	11.8308	15.5964	27.1534	16.4159	18.0742	24.7872	11.6166
Arhgap1	6.01831	-1.55759	0.776991	0.432301	0.979748		4.12674	1.64544	5.37763	3.89909	1.81022	11.4414	9.48895	7.08205	9.29332
Arhgap10	3.09018	0.6065	0.961359	1.12566	0.89018		1.7686	6.58177	2.15105	5.84864	1.81022	2.98471	3.16298	1.18034	2.32333
Arhgap11a	8.87746	-0.172241	0.588495	0.166911	0.996705		9.43254	4.93633	9.67974	11.6973	7.2409	9.94902	9.0371	7.08205	10.8422
Arhgap12	2.88491	-0.0389339	1.024	1.45145	0.835206		2.35814	3.29089	3.22658	1.94955	1.81022	4.97451	0.90371	5.90171	1.54889
Arhgap15	15.0741	-0.189635	0.463254	1.56898	0.814356		18.8651	21.3908	12.9063	13.6468	7.2409	15.9184	14.4594	16.5248	14.7144
Arhgap17	15.287	-1.67342	0.508325	4.26289	0.371595		17.686	8.22721	4.30211	9.74773	7.2409	22.3853	20.7853	22.4265	24.7822
Arhgap18	13.3696	-0.673412	0.491241	0.399323	0.982532		11.7907	11.5181	12.9063	7.79819	9.05112	13.4312	17.1705	16.5248	20.1355
Arhgap19	3.70229	-1.1755	0.940343	0.554579	0.967975		2.35814	3.29089	1.07553	1.94955	3.62045	6.96432	5.87411	3.54102	4.64666
Arhgap21	3.62124	-0.580753	0.933743	2.24231	0.691291		2.94767	3.29089	1.07553	5.84864	1.81022	2.48726	2.25927	5.90171	6.96999
Arhgap22	1.58248	-0.200693	1.45132	0.944889	0.918034		3.5372	0	3.22658	0	1.81022	2.48726	0.451855	1.18034	1.54889
Arhgap23	0.807987	0.362145	1.89167	2.19239	0.700423		0.589534	1.64544	0	0	1.81022	0.497451	0	1.18034	1.54889
Arhgap24	0.443493	-1.35598	2.54037	0.475734	0.97582		0.589534	0	0	0	0	0.497451	1.35556	0	1.54889
Arhgap25	8.62424	-1.35937	0.639661	1.73492	0.784365		8.84301	3.29089	6.45316	5.84864	3.62045	9.94902	12.6519	15.3444	11.6166
Arhgap26	6.47493	0.238649	0.715578	1.16271	0.884198		11.2011	4.93633	5.37763	9.74773	5.43067	4.97451	7.68153	1.18034	7.74443
Arhgap27	7.19191	-0.981983	0.695701	0.82801	0.934654		8.25348	8.22721	2.15105	3.89909	5.43067	7.46177	11.7482	8.26239	9.29332
Arhgap27os1	0.654526	0.967617	2.09051	1.58889	0.810788		1.7686	1.64544	1.07553	0	0	0.497451	0.90371	0	0
Arhgap27os2	5.55576	1.64656	0.750639	2.85692	0.582048		2.94767	6.58177	6.45316	13.6468	9.05112	2.48726	4.51855	3.54102	0.774443
Arhgap27os3	0.442871	0.250796	2.60137	0.566275	0.966737		0.589534	0	0	1.94955	0	0.994902	0.451855	0	0
Arhgap28	0.283239	0.966585	3.48486	0.50808	0.97271		0	1.64544	0	0	0	0	0.90371	0	0
Arhgap29	0.0552723	0.580731	3.52406	0.196393	0.995483		0	0	0	0	0	0.497451	0	0	0
Arhgap30	17.7331	-1.70142	0.481451	1.40829	0.842752		14.1488	4.93633	11.8308	9.74773	7.2409	36.8114	25.7557	21.2461	27.8799
Arhgap31	2.54936	-2.70978	1.29628	3.49964	0.477934		3.5372	0	2.15105	0	0	5.96941	5.42226	3.54102	2.32333
Arhgap32	0.422609	1.07703	2.84172	0.946039	0.917865		1.17907	0	1.07553	0	0	0	0	0	1.54889
Arhgap33	0.489527	-0.935192	2.48088	1.29033	0.863014		1.17907	0	0	0	0	0.497451	0	1.18034	1.54889
Arhgap35	3.43703	1.18876	0.905545	2.35062	0.67157		1.7686	8.22721	4.30211	3.89909	3.62045	3.48216	1.35556	1.18034	3.09777
Arhgap39	2.12304	-2.06634	1.37556	1.78934	0.774432		1.7686	0	3.22658	0	0	4.47706	2.25927	1.18034	6.19554
Arhgap4	14.4847	0.920389	0.457657	0.703744	0.950866		20.6337	21.3908	16.1329	17.5459	16.292	10.4465	7.22968	10.6231	10.0678
Arhgap5	7.74371	-1.96484	0.728503	0.782364	0.940797		2.94767	4.93633	2.15105	0	7.2409	12.9337	11.7482	15.3444	12.3911
Arhgap6	2.49288	-1.16703	1.22074	1.7862	0.775007		1.7686	1.64544	0	0	7.2409	3.48216	3.61484	2.36068	2.32333
Arhgap9	23.2054	-0.226165	0.377616	1.53055	0.821217		29.4767	23.0362	15.0574	21.445	23.5329	22.3853	23.4965	29.5085	20.91
Arhgef1	13.7462	-2.42264	0.588692	0.708536	0.950272		7.07441	6.58177	5.37763	3.89909	1.81022	22.8827	19.8816	28.3282	27.8799
Arhgef10	0.755375	-0.827899	1.98499	1.89116	0.755769		0.589534	0	0	1.94955	0	0.994902	0.90371	2.36068	0
Arhgef10l	1.64719	-0.491636	1.34147	3.19879	0.525126		0	1.64544	2.15105	0	1.81022	2.48726	0.90371	1.18034	4.64666
Arhgef11	1.13371	-2.90592	1.71494	1.27724	0.865225		1.17907	0	0	0	0	2.98471	1.35556	2.36068	2.32333
Arhgef12	0.388718	0.21297	2.88507	0.974452	0.913645		0	1.64544	0	0	0	0.497451	1.35556	0	0
Arhgef17	0.141322	-0.0390657	3.50888	0.269053	0.991723		0	0	0	0	0	0.497451	0	0	0.774443
Arhgef18	7.13862	1.42553	0.6654	2.03227	0.729823		11.2011	8.22721	15.0574	7.79819	7.2409	3.48216	4.9704	4.72137	1.54889
Arhgef2	16.771	0.0697291	0.425704	0.670857	0.954874		15.9174	23.0362	16.1329	15.5964	14.4818	17.4108	16.7186	17.7051	13.94
Arhgef25	0.250652	1.33937	3.52127	0.645267	0.957903		0	0	1.07553	0	0	0	0	1.18034	0
Arhgef3	3.5525	0.266989	0.91041	1.69557	0.791522		4.12674	3.29089	2.15105	3.89909	5.43067	0.994902	2.71113	4.72137	4.64666
Arhgef33	0.0860492	0.554858	3.52792	0.354142	0.986056		0	0	0	0	0	0	0	0	0.774443
Arhgef37	0.248331	1.93761	3.53185	0.241836	0.993253		0.589534	1.64544	0	0	0	0	0	0	0
Arhgef39	4.2479	-0.578517	0.838252	0.481209	0.975304		2.94767	4.93633	2.15105	1.94955	5.43067	4.97451	4.51855	5.90171	5.4211
Arhgef4	0.782558	0.160876	1.93509	0.512886	0.972234		0.589534	1.64544	0	1.94955	0	0	0.90371	1.18034	0.774443
Arhgef40	1.11788	-2.06427	1.68144	0.449189	0.978255		0.589534	0	0	0	1.81022	1.49235	2.25927	2.36068	1.54889
Arhgef6	14.4924	-1.43652	0.496982	0.982151	0.91249		8.84301	6.58177	7.52868	11.6973	7.2409	17.4108	20.7853	24.7872	25.5566
Arhgef7	6.63569	-0.705945	0.682079	1.6779	0.794728		4.12674	3.29089	8.60421	3.89909	5.43067	5.96941	10.8445	8.26239	9.29332
Arhgef9	0.251925	-0.0631523	3.4631	0.524304	0.971092		0.589534	0	0	0	0	0.497451	0	1.18034	0
Arid1a	19.6034	0.236609	0.398771	0.603328	0.962693		21.2232	24.6816	16.1329	21.445	21.7227	16.9133	17.1705	22.4265	14.7144
Arid1b	6.94254	-0.696847	0.670193	1.86403	0.760749		4.12674	4.93633	7.52868	3.89909	5.43067	7.95922	9.94081	4.72137	13.94
Arid2	5.03666	-0.853876	0.847186	1.51838	0.823382		4.71627	8.22721	1.07553	0	7.2409	5.96941	6.77782	5.90171	5.4211
Arid3a	7.15803	-0.526428	0.684404	3.5663	0.46787		6.48487	3.29089	13.9818	5.84864	1.81022	5.47196	9.94081	10.6231	6.96999
Arid3b	2.53953	-0.865809	1.10831	2.47887	0.648424		1.17907	1.64544	4.30211	0	1.81022	4.47706	3.61484	1.18034	4.64666
Arid4a	10.5931	0.072542	0.526922	0.591152	0.964042		11.2011	9.87266	10.7553	9.74773	12.6716	7.95922	11.2964	9.44273	12.3911
Arid4b	3.39966	-2.97929	1.21254	3.04635	0.550098		3.5372	0	1.07553	1.94955	0	4.47706	5.87411	8.26239	5.4211
Arid5a	8.03621	2.41014	0.658763	2.07831	0.721358		5.30581	18.0999	15.0574	13.6468	9.05112	1.49235	2.25927	3.54102	3.87221
Arid5b	1.09217	-2.0262	1.70223	0.210765	0.994822		0.589534	0	0	0	1.81022	2.48726	1.80742	2.36068	0.774443
Arih1	12.0518	-0.855668	0.526444	0.800869	0.938332		5.89534	6.58177	6.45316	11.6973	12.6716	16.4159	19.4298	17.7051	11.6166
Arih2	6.63831	0.00939196	0.67647	1.70852	0.789169		10.0221	6.58177	8.60421	5.84864	3.62045	4.47706	7.68153	8.26239	4.64666
Arl1	9.90151	-1.92476	0.67573	4.44068	0.349639		11.7907	4.93633	9.67974	1.94955	0	17.4108	14.9112	10.6231	17.8122
Arl10	0.780095	-1.58064	1.9574	0.449656	0.978213		0	0	1.07553	0	0	1.9898	0.451855	1.18034	2.32333
Arl11	6.58557	-1.50384	0.729884	1.25441	0.869061		3.5372	3.29089	2.15105	5.84864	3.62045	8.45667	8.13339	14.1641	10.0678
Arl13b	0.538759	-1.46028	2.36411	0.724343	0.948293		0.589534	0	0	0	0	0.994902	0.90371	2.36068	0
Arl14ep	2.75316	-1.40647	1.12807	1.02723	0.90564		2.35814	3.29089	1.07553	1.94955	0	4.47706	2.25927	4.72137	4.64666
Arl15	0.739739	0.234148	2.02578	1.98523	0.738475		0	0	1.07553	1.94955	0	0.497451	0	2.36068	0.774443
Arl16	2.07948	0.339062	1.20533	0.786253	0.940282		4.12674	1.64544	1.07553	3.89909	1.81022	1.49235	2.71113	1.18034	0.774443
Arl2	10.9687	1.79592	0.526693	2.37452	0.667236		7.66394	19.7453	17.2084	17.5459	16.292	5.47196	5.42226	4.72137	4.64666
Arl2bp	14.501	-0.138817	0.460807	1.09371	0.89527		15.9174	9.87266	12.9063	19.4955	12.6716	13.4312	12.6519	16.5248	17.0377
Arl3	7.12293	-0.685565	0.660669	1.98063	0.739321		4.12674	9.87266	4.30211	3.89909	5.43067	12.4363	10.3927	5.90171	7.74443
Arl4a	6.50098	0.137849	0.672132	0.875693	0.928022		6.48487	3.29089	7.52868	5.84864	10.8613	5.47196	4.9704	7.08205	6.96999
Arl4c	21.9557	0.193884	0.369265	3.92494	0.416259		11.7907	24.6816	21.5105	29.2432	23.5329	18.9031	19.8816	27.1479	20.91
Arl4d	0.105478	-0.0379606	3.5087	0.0949498	0.998908		0	0	0	0	0	0.497451	0.451855	0	0
Arl5a	14.9199	-0.033409	0.482613	2.21587	0.696125		11.7907	16.4544	22.5861	19.4955	3.62045	18.9031	14.9112	11.8034	14.7144
Arl5b	1.77732	-0.783306	1.32697	2.09459	0.718365		1.7686	3.29089	2.15105	0	0	2.48726	3.16298	2.36068	0.774443
Arl5c	5.01941	-0.419892	0.823272	6.57682	0.160014		2.94767	3.29089	9.67974	0	5.43067	10.4465	6.77782	1.18034	5.4211
Arl6	2.74192	-0.509962	1.0792	1.4752	0.831025		2.94767	3.29089	1.07553	5.84864	0	2.48726	3.16298	3.54102	2.32333
Arl6ip4	22.0267	1.0401	0.380845	0.319873	0.988495		27.7081	26.3271	35.4924	23.3946	28.9636	13.4312	14.0075	16.5248	12.3911
Arl6ip5	29.2101	-0.0344998	0.339347	0.425877	0.980304		32.4244	23.0362	29.0392	37.0414	25.3431	28.8522	27.1113	25.9675	34.0755
Arl6ip6	6.81102	-0.386673	0.697921	0.727925	0.947841		7.66394	4.93633	5.37763	11.6973	1.81022	5.96941	6.32597	5.90171	11.6166
Arl8a	12.8826	-1.15797	0.518088	1.94317	0.746211		14.7383	9.87266	6.45316	7.79819	7.2409	17.4108	15.3631	17.7051	19.3611
Arl8b	25.1292	0.130032	0.358111	0.602644	0.962769		20.0442	26.3271	26.8882	33.1423	21.7227	25.37	23.9483	20.0658	28.6544
Armc1	7.6406	0.539232	0.620755	0.841628	0.932782		6.48487	11.5181	11.8308	5.84864	7.2409	4.47706	7.68153	8.26239	5.4211
Armc10	8.49814	0.192653	0.601324	0.877596	0.927753		8.84301	8.22721	11.8308	5.84864	9.05112	6.46686	8.58524	12.9838	4.64666
Armc2	0.251925	-0.0631523	3.4631	0.524304	0.971092		0.589534	0	0	0	0	0.497451	0	1.18034	0
Armc3	0.713591	1.26814	2.00613	1.79802	0.772844		1.17907	1.64544	2.15105	0	0	0.994902	0.451855	0	0
Armc5	6.8745	1.65929	0.662106	2.31076	0.678811		4.71627	13.1635	9.67974	15.5964	5.43067	3.48216	3.16298	3.54102	3.09777
Armc6	1.97848	1.25679	1.26343	0.284583	0.990788		3.5372	1.64544	1.07553	3.89909	3.62045	0.994902	2.25927	0	0.774443
Armc7	3.33123	-0.660335	0.973766	1.00737	0.908676		2.35814	0	2.15105	3.89909	5.43067	3.97961	3.16298	5.90171	3.09777
Armc8	3.7988	-0.169343	0.890531	2.49449	0.645624		1.17907	8.22721	4.30211	0	3.62045	4.97451	4.06669	4.72137	3.09777
Armc9	0.352337	-0.926274	2.78935	0.406108	0.981974		0.589534	0	0	0	0	0.497451	0.90371	1.18034	0
Armcx2	0.386325	1.86598	2.90066	1.11074	0.892565		0	0	1.07553	1.94955	0	0	0.451855	0	0
Armcx3	3.3536	-1.2427	0.99579	0.807849	0.937393		1.17907	3.29089	3.22658	0	1.81022	6.96432	3.16298	5.90171	4.64666
Armcx5	0.110545	0.274777	3.51217	0.4094	0.9817		0	0	0	0	0	0.994902	0	0	0
Armcx6	0.426559	0.959717	2.83225	0.805412	0.937721		1.7686	0	1.07553	0	0	0.994902	0	0	0
Armh3	2.27478	0.235481	1.09194	0.979876	0.912832		1.17907	3.29089	3.22658	1.94955	1.81022	1.49235	3.61484	2.36068	1.54889
Armt1	5.55837	0.0462947	0.725143	1.00891	0.908441		4.12674	9.87266	4.30211	5.84864	3.62045	4.97451	6.32597	7.08205	3.87221
Arnt	2.691	-2.09325	1.2389	1.85723	0.761996		1.17907	0	0	3.89909	1.81022	4.47706	2.71113	4.72137	5.4211
Arntl	0.336898	-0.52105	3.07067	0.749779	0.945051		1.17907	0	0	0	0	0.497451	1.35556	0	0
Arpc1a	22.5309	1.0377	0.369749	3.15422	0.532356		15.9174	34.5543	29.0392	25.3441	36.2045	15.421	13.1038	17.7051	15.4889
Arpc5l	19.6186	-1.10119	0.434783	3.39104	0.494638		22.4023	6.58177	9.67974	17.5459	16.292	29.8471	20.3335	28.3282	25.5566
Arpin	0.665673	0.531551	2.1923	1.89063	0.755865		0	1.64544	0	1.94955	0	1.49235	0.90371	0	0
Arrb1	9.95144	-0.79465	0.568074	1.45744	0.834152		5.89534	6.58177	6.45316	9.74773	7.2409	10.9439	10.3927	10.6231	21.6844
Arrb2	38.1169	0.559388	0.310535	0.690103	0.952544		45.9836	42.7815	58.0784	40.9405	34.3943	29.3496	28.015	24.7872	38.7221
Arrdc1	16.2354	1.42753	0.440798	0.863891	0.929683		18.8651	19.7453	22.5861	23.3946	27.1534	9.94902	7.68153	5.90171	10.8422
Arrdc2	0.676446	-0.12557	2.19468	2.34972	0.671733		0.589534	1.64544	0	0	0	1.49235	0	2.36068	0
Arrdc3	2.98216	-1.65531	1.10426	3.98881	0.407523		0.589534	4.93633	2.15105	0	0	7.95922	4.9704	2.36068	3.87221
Arrdc4	2.44066	0.718147	1.16639	2.17562	0.703495		5.30581	1.64544	2.15105	0	7.2409	1.9898	0.90371	1.18034	1.54889
Arsa	2.53998	-4.07424	1.3809	4.38743	0.356105		2.94767	0	0	0	0	4.97451	3.61484	5.90171	5.4211
Arsb	15.6217	-0.054447	0.447347	4.68176	0.321536		9.43254	6.58177	16.1329	21.445	21.7227	11.9388	16.7186	14.1641	22.4588
Arsi	0.216616	1.88136	3.52396	0.630713	0.95959		0	0	0	1.94955	0	0	0	0	0
Arsk	1.65288	-1.11023	1.4022	1.07231	0.898641		0.589534	1.64544	2.15105	0	0	2.98471	0.90371	1.18034	5.4211
Arv1	0.850974	-0.377869	1.84119	1.86115	0.761277		0	0	0	1.94955	1.81022	1.49235	0.451855	1.18034	0.774443
Arxes2	0.131008	1.23148	3.53373	0.375723	0.984416		1.17907	0	0	0	0	0	0	0	0
As3mt	0.0502061	0.556333	3.52771	0.113493	0.99845		0	0	0	0	0	0	0.451855	0	0
Asah2	0.217198	-0.0804251	3.51594	0.469258	0.976424		0	0	0	0	0	0	0	1.18034	0.774443
Asap1	7.6478	-0.573329	0.684182	0.39519	0.982869		8.84301	3.29089	3.22658	11.6973	7.2409	9.94902	11.7482	3.54102	9.29332
Asap2	1.28482	-2.37234	1.64253	1.36108	0.850931		0	0	0	0	1.81022	2.48726	1.80742	2.36068	3.09777
Asb1	2.21362	0.943562	1.22011	0.535682	0.969936		2.35814	1.64544	3.22658	7.79819	0	1.9898	1.35556	0	1.54889
Asb13	1.86965	-0.400683	1.28741	0.630117	0.959659		1.7686	1.64544	2.15105	1.94955	0	0.497451	1.80742	2.36068	4.64666
Asb2	12.238	0.371698	0.505663	1.66357	0.797324		15.3279	19.7453	11.8308	5.84864	16.292	9.45157	9.0371	9.44273	13.1655
Asb3	3.06682	0.569249	0.952462	0.537692	0.969729		2.94767	3.29089	2.15105	3.89909	5.43067	2.98471	1.80742	3.54102	1.54889
Asb4	0.0552723	0.580731	3.52406	0.196393	0.995483		0	0	0	0	0	0.497451	0	0	0
Asb6	2.04325	-2.10252	1.37434	1.02466	0.906033		1.7686	0	1.07553	1.94955	0	5.47196	2.25927	3.54102	2.32333
Asb7	1.95025	-2.0178	1.37526	2.0781	0.721397		0.589534	0	0	1.94955	1.81022	1.49235	2.71113	5.90171	3.09777
Asb8	7.87044	0.477103	0.6178	3.17659	0.52872		9.43254	6.58177	12.9063	3.89909	12.6716	5.47196	8.58524	3.54102	7.74443
Ascc1	17.0787	1.65599	0.447042	3.40377	0.49266		13.5593	21.3908	27.9637	33.1423	23.5329	5.96941	9.48895	4.72137	13.94
Ascc2	9.32723	2.2419	0.61367	3.71306	0.446229		5.89534	11.5181	23.6616	11.6973	16.292	1.9898	2.71113	7.08205	3.09777
Ascc3	2.93167	0.608057	0.977202	0.910111	0.923106		2.35814	4.93633	2.15105	3.89909	3.62045	3.97961	2.71113	1.18034	1.54889
Asf1a	3.40295	-1.96876	1.08682	1.44799	0.835813		2.94767	1.64544	2.15105	1.94955	0	3.97961	8.58524	4.72137	4.64666
Asf1b	5.46595	-1.44575	0.854132	3.04315	0.55063		6.48487	6.58177	1.07553	1.94955	1.81022	4.97451	6.32597	15.3444	4.64666
Asgr2	0.421051	1.63176	2.79495	1.36548	0.850172		0	0	1.07553	0	1.81022	0	0.90371	0	0
Ash1l	3.89156	-1.79636	1.03185	2.23525	0.692582		1.7686	4.93633	0	0	3.62045	3.48216	4.06669	7.08205	10.0678
Ash2l	8.37969	0.773981	0.605883	1.19397	0.879091		12.3802	11.5181	12.9063	5.84864	9.05112	3.48216	8.13339	5.90171	6.19554
Asl	11.2613	0.590008	0.510479	0.747698	0.945319		12.3802	18.0999	12.9063	11.6973	10.8613	10.4465	8.58524	7.08205	9.29332
Asns	2.63455	-2.67294	1.28144	0.841474	0.932803		1.17907	0	1.07553	0	1.81022	3.48216	4.06669	5.90171	6.19554
Asnsd1	13.7845	-0.34766	0.476143	1.19732	0.878539		11.2011	13.1635	9.67974	15.5964	10.8613	10.4465	14.4594	20.0658	18.5866
Asph	3.06441	-1.34656	1.04794	0.246076	0.993024		1.17907	3.29089	2.15105	1.94955	0	3.97961	4.51855	3.54102	6.96999
Aspm	2.56923	-1.00996	1.13199	1.72882	0.785477		1.17907	1.64544	1.07553	0	5.43067	1.9898	3.61484	3.54102	4.64666
Asprv1	0.141322	-0.0390657	3.50888	0.269053	0.991723		0	0	0	0	0	0.497451	0	0	0.774443
Aspscr1	16.6128	1.86552	0.455924	5.73146	0.220121		8.84301	21.3908	26.8882	31.1928	30.7738	10.9439	5.87411	3.54102	10.0678
Asrgl1	5.46348	-0.0834429	0.74295	0.447824	0.978377		5.30581	8.22721	7.52868	1.94955	3.62045	5.47196	4.9704	5.90171	6.19554
Ass1	21.8676	0.0175705	0.397095	4.06528	0.397243		21.8128	34.5543	18.2839	13.6468	21.7227	29.3496	25.7557	20.0658	11.6166
Aste1	0.56441	-2.12406	2.28012	0.0664048	0.999461		0	0	0	0	0	0.994902	1.35556	1.18034	1.54889
Astl	0.0655038	1.23144	3.53373	0.139814	0.997667		0.589534	0	0	0	0	0	0	0	0
Asxl1	10.0896	0.649501	0.537493	1.77234	0.777539		8.84301	16.4544	9.67974	9.74773	14.4818	9.45157	8.13339	4.72137	9.29332
Asxl2	6.53118	-0.0295476	0.691956	2.05662	0.725345		5.30581	4.93633	6.45316	1.94955	14.4818	7.95922	6.77782	4.72137	6.19554
Atad1	11.3404	-0.58676	0.532335	2.70063	0.609104		5.30581	9.87266	10.7553	3.89909	14.4818	10.9439	19.8816	12.9838	13.94
Atad2	10.2634	0.339804	0.536931	1.98269	0.738943		8.84301	9.87266	7.52868	19.4955	10.8613	7.95922	9.0371	11.8034	6.96999
Atad2b	11.1	0.963395	0.535865	3.21922	0.521832		10.6116	23.0362	17.2084	7.79819	10.8613	6.96432	9.0371	3.54102	10.8422
Atad3a	8.97053	0.550668	0.582715	2.51176	0.642531		5.30581	9.87266	8.60421	5.84864	21.7227	6.46686	7.68153	8.26239	6.96999
Atad3aos	0.0552723	0.580731	3.52406	0.196393	0.995483		0	0	0	0	0	0.497451	0	0	0
Atad5	1.73662	-0.620876	1.33451	2.69991	0.609231		2.94767	0	1.07553	1.94955	1.81022	0.497451	2.25927	3.54102	1.54889
Atat1	0.618567	-1.76436	2.25147	0.694324	0.952027		0.589534	0	0	0	0	1.9898	1.80742	1.18034	0
Atcay	0.0552723	0.580731	3.52406	0.196393	0.995483		0	0	0	0	0	0.497451	0	0	0
Atcayos	0.186421	-0.0629533	3.51248	0.403244	0.98221		0	0	0	0	0	0.497451	0	1.18034	0
Ate1	8.88329	0.293913	0.628217	1.76774	0.77838		7.07441	18.0999	2.15105	15.5964	7.2409	5.96941	8.58524	8.26239	6.96999
Atf1	14.2946	-0.100054	0.468287	1.591	0.810409		17.0965	11.5181	16.1329	11.6973	14.4818	16.9133	18.9779	9.44273	12.3911
Atf2	5.46061	-1.4207	0.790789	0.353812	0.986081		3.5372	3.29089	3.22658	3.89909	1.81022	7.46177	6.77782	10.6231	8.51887
Atf3	5.82881	-1.63383	0.814581	2.86389	0.580856		1.17907	1.64544	3.22658	0	9.05112	6.46686	11.7482	10.6231	8.51887
Atf4	19.2338	-1.34931	0.465629	1.12108	0.890914		12.9697	14.809	16.1329	9.74773	3.62045	36.3139	19.4298	28.3282	31.7522
Atf5	2.80455	-1.63592	1.12351	0.25385	0.992595		1.7686	1.64544	2.15105	1.94955	0	5.47196	4.06669	3.54102	4.64666
Atf6	7.98025	-0.681887	0.655818	2.92103	0.571127		5.30581	4.93633	13.9818	1.94955	5.43067	12.4363	9.48895	5.90171	12.3911
Atf6b	6.1968	-3.96358	1.12713	4.70977	0.318394		5.30581	1.64544	1.07553	0	0	10.9439	12.2001	12.9838	11.6166
Atf7	2.75688	-2.72126	1.32146	1.23865	0.871696		1.17907	0	2.15105	0	0	2.48726	1.80742	9.44273	7.74443
[truncated: 12,747 more rows]
