# Supplementary material for: SARS-CoV-2 mRNA vaccine is re-adenylated in vivo, enhancing antigen production and immune response
Source: bioRxiv preprint, doi:10.1101/2022.12.01.518149, version 2 (2022-12-16)
Supplement: Supplementary Table 6 [file 518149_file11.xlsx]

## Sheet: Supplementary Table 6
gene	BMDM WT						BMDM Tent5aflox/flox Tentc-/-						p. value	adjusted p. value	statistic	effect size	cluster
	TENT5_WT_0h	TENT5_WT_4h	TENT5_WT_12h	TENT5_WT_24h	TENT5_WT_48h	TENT5_WT_72h	TENT5_AC_0h	TENT5_AC_4h	TENT5_AC_12h	TENT5_AC_24h	TENT5_AC_48h	TENT5_AC_72h
Apoe	148.229	129.875	132.072	161.993	155.861	148.095	101.725	100.586	96.0436	107.338	103.293	102.643	1.26428e-170	1.18968e-166	805.024	0.0925635	4
B2m	126.845	128.021	139.003	146.207	127.792	126.125	122.718	127.265	138.122	140.599	122.538	116.748	5.04071e-146	2.37166e-142	691.126	0.0202101	4
Lyz2	140.048	137.121	143.984	148.331	138.205	138.534	118.637	117.714	121.74	122.815	119.221	115.728	2.99181e-122	9.38433e-119	580.953	0.0119415	4
Ctsb	121.585	120.557	122.169	128.849	124.178	124.688	116.47	118.572	117.838	120.873	114.43	112.258	2.15122e-78	2.53038e-75	377.265	0.00477032	4
Selenop	109.667	97.2003	91.7932	125.832	106.721	110.567	106.29	99.2511	97.5271	119.374	111.132	102.536	2.26901e-77	2.37238e-74	372.503	0.0373063	4
Cst3	138.192	130.431	138.657	144.84	132.323	130.315	101.82	104.42	104.388	108.589	103.167	101.222	3.29916e-69	3.10451e-66	334.485	0.0265865	4
Fth1	97.4669	100.787	98.5277	96.1496	100.183	102.059	93.2779	97.9199	95.7156	91.7279	96.2316	96.1719	2.03131e-68	1.7377e-65	330.806	0.00254864	2
Tmsb4x	108.277	107.91	105.336	96.9595	100.174	103.38	104.365	104.11	101.949	97.8982	99.777	97.9069	1.16731e-67	9.15367e-65	327.266	0.00620409	1
Ctss	113.444	114.251	128.646	133.456	121.111	121.438	101.708	100.275	114.281	120.777	106.879	105.233	1.37027e-67	9.91865e-65	326.941	0.0192386	4
Ftl1	116.056	115.8	116.397	112.249	118.759	118.99	107.659	111.702	113.102	106.56	109.378	110.551	7.22883e-63	4.85881e-60	304.917	0.00285698	2
Ly6e	118.955	109.564	138.972	132.052	118.298	117.934	114.211	111.741	133.816	126.239	114.702	111.502	1.73092e-58	1.08586e-55	284.474	0.0295466	3
Itm2b	108.906	106.517	110.409	125.614	109.694	112.157	108.754	106.157	115.964	118.805	110.806	107.72	1.93269e-55	1.13666e-52	270.234	0.0140813	4
H2-D1	118.946	115.093	126.989	132.471	124.562	120.943	106.696	110.343	117.386	121.086	110.335	105.574	4.41105e-54	2.44165e-51	263.884	0.0121159	4
Ctsd	128.315	125.249	127.91	131.568	127.759	129.415	116.46	116.816	115.934	114.164	113.724	113.626	1.33259e-50	6.96649e-48	247.605	0.00302223	4
Spp1	135.488	143.875	133.321	124.15	121.384	127.227	135.172	136.971	126.056	126.535	112.974	119.507	1.70208e-42	8.00828e-40	209.614	0.0186224	1
Ifitm3	102.827	102.819	135.939	125.724	110.403	106.096	101.711	105.118	145.582	130.296	105.716	104.313	3.78868e-42	1.69769e-39	207.983	0.0304424	3
Pltp	121.89	110.261	113.757	143.577	138.107	131.112	100.077	93.2016	90.4488	115.134	117.393	106.143	5.39038e-41	2.30561e-38	202.568	0.0706303	4
Mmp12	131.67	156.725	134.095	115.565	125.356	126.774	128.615	152.831	140.217	119.855	126.454	130.576	1.14986e-35	4.50841e-33	177.504	0.0420625	1
Gpnmb	125.747	128.017	131.775	126.034	120.927	127.248	119.088	123.135	128.796	121.995	112.921	113.629	3.27295e-35	1.18456e-32	175.364	0.00280094	3
Prdx1	117.461	127.098	122.523	110.462	113.616	119.823	114.127	120.286	120.507	109.986	113.721	110.562	1.14484e-34	3.98996e-32	172.801	0.0104103	2
Rn18s	29.4172	32.0186	32.021	55.7359	32.9208	52.9911	51.0907	28.9544	26.4754	31.5055	29.5504	47.7927	1.84871e-34	6.213e-32	171.82	0.0468942	4
Ifi27l2a	95.3577	99.0983	102.271	118.556	106.673	106.771	94.6762	96.0638	111.551	124.55	103.494	105.013	1.06128e-29	3.32888e-27	149.351	0.0255432	4
Lgals1	93.6335	92.7149	89.022	82.621	93.6118	95.0982	89.8696	90.8743	85.0786	86.0037	86.8025	87.0155	2.23829e-27	6.7943e-25	138.346	0.00856685	2
Ftl1-ps1	104.486	105.52	104.381	100.944	111.487	110.494	98.0956	101.494	102.393	98.2408	103.009	101.65	5.70646e-27	1.67806e-24	136.419	0.0078814	2
C1qb	110.207	110.608	114.96	128.181	122.566	119.684	106.805	107.571	109.382	121.532	117.575	110.102	6.11675e-27	1.7442e-24	136.276	0.014479	4
Tpt1	78.7335	79.8396	75.935	78.1423	82.0356	85.1376	75.8663	75.4927	72.5762	72.6306	79.8963	81.2828	8.84726e-27	2.44861e-24	135.516	0.00703102	2
H2-K1	126.675	134.47	137.339	141.31	129.523	122.449	116.702	136.189	123.498	134.778	120.312	112.387	3.88382e-26	1.04419e-23	132.468	0.0115804	3
Lilr4b	203.358	208.522	183.801	167.833	172.711	168.376	175.766	199.896	173.259	169.059	169.854	157.043	4.89665e-26	1.27993e-23	131.99	0.0325098	1
Psap	134.639	130.557	134.469	139.285	131.402	134.078	126.955	130.759	136.091	132.427	127.219	121.796	3.37995e-25	8.59603e-23	128.005	0.00362109	4
Gapdh	91.9027	95.7329	93.6255	78.9846	88.7473	93.852	89.2207	93.754	93.2021	84.4109	83.0072	85.6714	4.40428e-25	1.09064e-22	127.459	0.0151918	2
Calr	93.1959	93.493	111.578	89.9656	93.6643	99.6912	88.393	88.6594	112.123	87.2037	90.3865	98.1446	1.01316e-24	2.44458e-22	125.74	0.024406	3
Trf	140.649	118.945	128.284	154.201	150.921	140.705	88.3543	97.2143	82.5472	103.877	115.917	110.012	1.22894e-24	2.89107e-22	125.341	0.0863824	4
Lgals3	106.08	110.126	106.226	100.936	105.241	107.077	99.603	105.03	104.412	99.7378	98.0652	97.8269	4.96805e-24	1.14023e-21	122.455	0.00240434	2
Sqstm1	105.604	124.007	101.123	104.789	104.054	106.301	105.739	126.065	103.821	106.884	103.637	106.857	1.68575e-23	3.77688e-21	119.93	0.0200888	1
Npc2	119.228	118.859	126.942	128.869	117.2	118.201	110.351	113.984	117.282	123.55	111.053	105.019	3.16159e-23	6.91873e-21	118.629	0.0111872	4
Bst2	105.077	110.476	136.949	125.292	113.404	112.921	105.914	113.214	133.83	122.779	107.525	106.35	9.42953e-23	2.01663e-20	116.368	0.0230843	3
Cstb	113.964	118.904	107.807	103.398	105.149	105.679	108.727	114.733	103.957	105.476	99.1216	101.548	5.22941e-22	1.09353e-19	112.82	0.0126793	1
Hexa	118.183	115.416	128.619	132.084	122.973	124.432	106.759	107.086	108.461	111.526	102.976	103.208	5.50217e-22	1.12555e-19	112.715	0.0193735	4
Cfp	107.219	105.152	106.049	125.96	119.651	119.649	98.4949	92.843	97.0554	114.536	116.429	105.585	4.08304e-21	8.00447e-19	108.559	0.0224434	4
Pf4	142.053	142.042	143.923	133.707	127.346	137.235	106.521	107.315	93.0345	93.2209	106.667	111.462	9.5906e-18	1.84179e-15	92.4038	0.0103037	1
H2-T23	94.7285	101.552	132.795	124.988	112.058	104.572	88.0674	90.6316	137.92	122.387	99.0922	86.0637	1.05697e-17	1.98921e-15	92.2008	0.0268182	3
C1qc	100.982	98.042	106.825	115.951	109.235	104.473	101.165	97.0647	96.2083	103.167	104.174	94.9393	1.50984e-17	2.78581e-15	91.4559	0.0141049	4
Actb	103.353	104.752	99.2642	99.2724	99.4322	98.1449	101.615	100.924	101.511	99.9755	97.2233	93.2133	8.26584e-16	1.46758e-13	83.0748	0.0022926	1
Hsp90b1	98.4182	107.899	126.167	95.5347	113.624	111.441	104.841	106.126	134.9	96.2522	111.793	108.121	9.37167e-15	1.6331e-12	77.9712	0.035783	3
Ctsl	115.621	121.603	113.966	113.437	111.753	117.213	113.142	112.938	108.69	111.481	109.902	111.877	1.1889e-14	2.0341e-12	77.4702	0.00343047	1
Gm29216	66.7643	68.4259	69.1922	69.5729	68.5746	64.9965	67.68	69.7801	67.7521	69.718	66.0357	63.8165	1.38217e-14	2.32254e-12	77.153	0.0150689	3
Eef1a1	95.378	95.7088	93.5516	91.704	94.5216	98.4599	91.6084	93.9448	91.0413	90.3365	92.2893	91.5351	5.50948e-14	9.09548e-12	74.2373	0.00265058	2
Vim	86.4082	92.1537	94.5238	80.6571	91.7493	93.1381	82.1408	85.4431	93.6248	87.4548	85.0176	85.7223	1.66765e-13	2.70563e-11	71.8977	0.00669065	2
Cd36	119.78	130.718	128.057	108.777	122.604	126.633	122.582	121.687	130.473	119.525	110.859	120.038	4.33962e-13	6.92132e-11	69.874	0.0156248	2
Hspa8	96.8703	103.988	110.356	94.3811	98.5276	98.9647	91.765	97.0492	109.366	91.1881	96.6043	95.4795	1.5742e-12	2.46887e-10	67.142	0.00912379	3
Cd9	137.599	146.029	128.806	116.222	124.422	123.137	132.141	143.576	122.167	113.793	121.57	117.614	3.42037e-12	5.27634e-10	65.4935	0.0276577	1
Wfdc17	150.457	144.318	151.304	148.457	133.08	131.383	121.746	119.778	118.37	125.088	100.442	117.167	6.46381e-12	9.8104e-10	64.1396	0.0382695	3
Tyrobp	119.093	117.961	124.278	124.975	118.744	118.565	107.276	112.284	112.068	110.373	109.832	104.264	1.09502e-11	1.63558e-09	63.0169	0.00484447	4
Fcgrt	102.455	95.0447	90.6094	128.814	115.038	111.721	96.546	94.3588	97.3026	121.792	111.755	110.217	1.41886e-11	2.08617e-09	62.4647	0.061663	4
Man2b1	146.217	132.347	131.867	156.136	143.649	140.566	116.145	109.408	110.981	121.047	107.03	107.94	1.46149e-11	2.11579e-09	62.4016	0.0250609	4
Rps3a1	94.3058	93.3988	85.9261	94.5012	100.814	102.639	87.9751	95.1242	89.4769	89.6417	96.4199	91.0779	2.24328e-11	3.19838e-09	61.4875	0.0131637	2
Rps6	95.3734	97.6038	90.3292	98.106	105.756	104.082	89.6045	91.8335	88.6232	89.7508	98.4393	90.7874	3.12684e-11	4.39158e-09	60.7784	0.014321	2
Lilrb4a	178.621	208.68	182.405	171.699	187.135	185.749	174.916	202.714	166.494	165.957	179.859	165.617	5.47003e-11	7.40843e-09	59.5831	0.0162751	1
Cd52	102.409	106.274	107.942	117.55	100.15	96.7216	96.7205	93.5637	106.942	106.321	97.1392	90.8452	5.44481e-11	7.40843e-09	59.593	0.0188287	3
Fabp5	98.1145	99.6196	107.385	105.995	102.086	104.674	99.0059	97.1338	106.646	103.272	99.9162	97.9621	5.51105e-11	7.40843e-09	59.5671	0.00344637	3
Pld3	119.144	113.993	118.393	126.932	120.329	121.09	106.58	106.514	111.229	104.705	109.221	106.307	9.19352e-11	1.21846e-08	58.4719	0.0117461	4
Gnas	111.704	114.011	113.679	109.399	97.4531	100.694	112.177	109.038	117.305	106.889	101.27	98.2458	1.22099e-10	1.59577e-08	57.864	0.0125084	3
Rbm3	111.153	116.264	97.601	94.741	102.561	106.327	109.625	113.445	91.4705	99.513	103.16	102.228	1.5056e-10	1.94078e-08	57.4149	0.0257813	1
Esd	103.196	111.298	95.9748	90.1101	91.2408	102.066	94.8415	107.028	93.0889	88.7955	92.6217	90.4517	1.71756e-10	2.18409e-08	57.1324	0.0159365	1
Grn	115.31	113.35	120.645	123.755	117.954	114.983	107.168	108.851	114.791	116.811	107.807	106.158	1.83673e-10	2.30449e-08	56.9885	0.00428324	4
Ppia	110.377	111.683	109.547	102.178	106.864	113.375	110.07	113.495	111.159	103.918	102.07	103.806	2.25169e-10	2.78795e-08	56.5514	0.00625846	2
Timp2	113.304	110.516	119.198	124.525	118.122	116.612	98.7686	100.575	99.5282	109.461	101.672	98.0062	2.31437e-10	2.82834e-08	56.4925	0.0110553	4
Ubc	109.921	106.831	106.743	99.16	96.3445	96.5603	103.1	108.807	102.43	100.165	93.6586	91.8939	2.63551e-10	3.17701e-08	56.2135	0.00546824	1
Cd5l	128.235	121.074	127.618	135.184	122.783	128.242	124.037	129.534	122.156	122.556	114.843	112.769	2.6672e-10	3.17701e-08	56.1878	0.0134228	4
Capg	107.093	112.162	102.83	97.6342	100.161	104.803	96.7852	103.832	101.445	99.6896	95.625	95.7389	3.09928e-10	3.64552e-08	55.8653	0.0081818	1
Gclm	135.362	139.95	107.344	116.25	122.967	111.71	132.507	138.981	108.935	120.294	112.174	106.139	3.45861e-10	4.01797e-08	55.6296	0.0694502	1
Lamp1	124.502	123.989	124.91	131.297	119.104	125.215	120.157	124.13	122.43	126.039	116.233	111.934	3.97332e-10	4.55963e-08	55.3314	0.0056214	4
Gm49339	125.997	144.159	120.722	115.152	122.148	118.384	132.478	130.03	120.464	122.196	116.831	113.518	2.60352e-09	2.91657e-07	51.2789	0.0170305	1
Sdf2l1	95.9831	105.69	133.905	94.7707	100.159	115.979	104.338	101.486	125.382	93.9452	102.919	88.5556	2.67894e-09	2.96575e-07	51.2172	0.0860792	3
Slc6a8	120.94	129.358	104.25	108.127	96.9191	102.14	128.684	128.12	101.634	106.629	111.104	102.682	3.00052e-09	3.28312e-07	50.972	0.029549	1
Ubb	96.7105	109.595	101.938	101.406	98.8118	101.069	93.6857	106.199	99.7769	97.5196	96.0078	92.6185	4.2572e-09	4.60463e-07	50.2148	0.00452101	1
Gm28437	68.5767	70.1102	69.6242	69.9667	68.8406	68.0235	70.0251	70.7275	70.4005	70.9759	69.8022	65.5764	5.31345e-09	5.68177e-07	49.7347	0.00797158	3
Msr1	133.271	143.89	124.802	110.134	127.836	117.78	117.888	120.85	127.637	121.135	128.566	121.151	5.43606e-09	5.74756e-07	49.6852	0.0369407	1
Ctnnb1	146.071	148.598	121.06	126.508	131.952	131.606	146.316	150.88	112.279	118.85	123.794	111.475	5.99943e-09	6.27274e-07	49.4714	0.027257	1
Cyba	87.1107	91.4354	92.135	95.1488	96.1548	96.6032	88.4828	96.5091	91.2527	92.2639	95.6506	93.3417	6.66994e-09	6.89716e-07	49.2417	0.00475673	2
Nupr1	129.8	160.239	162.25	122.111	93.4231	100.221	145.474	147.585	117.136	110.278	95.0476	92.931	1.26563e-08	1.28926e-06	47.8507	0.198551	3
Zfas1	169.692	198.306	202.438	166.939	157.339	139.153	156.472	193.6	219.727	184.02	151.625	112.027	1.27419e-08	1.28926e-06	47.836	0.100075	3
Rack1	96.3548	101.883	93.3007	99.0677	106.386	107.146	93.0151	96.3853	91.6967	91.1234	98.9803	96.7625	1.77459e-08	1.77648e-06	47.1153	0.00935385	2
Hspa5	104.45	105.153	114.966	98.9619	100.042	102.676	98.2053	102.275	112.806	94.6821	95.4223	99.25	2.39763e-08	2.37492e-06	46.4599	0.0125499	3
Rpl11	86.9355	87.2017	82.6428	88.4732	92.8117	94.745	82.54	87.033	82.4664	81.8413	91.2178	90.5543	2.50249e-08	2.45297e-06	46.3666	0.00927146	2
Rps27rt	94.5087	91.5473	87.3857	103.017	101.988	100.484	93.2224	99.4179	90.6986	99.2463	105.531	95.4565	3.0694e-08	2.97763e-06	45.9212	0.0102388	4
Rps8	99.1765	93.7682	92.8293	95.2731	105.046	100.218	91.5698	94.2822	89.4034	89.2341	99.9668	95.4556	3.36192e-08	3.22813e-06	45.7226	0.00939441	2
Lst1	105.773	98.7037	113.283	128.41	108.313	107.723	93.8943	98.7198	97.9868	117.919	105.65	94.3956	3.92001e-08	3.72599e-06	45.3873	0.018701	4
Laptm5	102.798	103.408	102.927	110.345	108.36	108.776	102.092	101.931	99.7016	106.24	105.41	100.362	4.26075e-08	4.00937e-06	45.2052	0.00471231	4
Pdia6	123.223	123.596	134.901	100.611	117.37	100.963	90.405	114.064	131.625	106.577	101.265	116.975	5.79076e-08	5.34226e-06	44.5344	0.0475795	1
Rps10	79.9	82.2242	79.6845	80.1644	85.9287	88.5051	76.3796	82.7828	76.7224	77.1138	83.7818	81.1511	5.73808e-08	5.34226e-06	44.5544	0.00828765	2
Rpl8	102.209	100.234	95.9821	99.3493	110.927	106.451	96.5908	99.4437	94.6113	99.6757	104.206	95.5312	7.41439e-08	6.77373e-06	43.9934	0.0107933	2
Rplp1	87.8117	89.1895	89.6113	87.0926	89.6016	93.9494	88.5437	88.021	86.4488	85.2942	83.0257	85.7045	1.01052e-07	9.14323e-06	43.3148	0.00252021	2
Npy	119.472	128.445	132.656	123.428	116.154	123.551	103.211	120.136	122.887	103.251	102.886	106.779	1.37034e-07	1.22808e-05	42.6463	0.0111494	3
Clec4d	108.282	123.047	120.294	113.024	114.903	118.519	104.372	120.327	111.373	114.918	115.959	113.437	1.82285e-07	1.61821e-05	42.0191	0.00827963	1
Pgk1	107.437	111.446	115.672	94.7381	105.5	103.548	103.747	112.518	112.149	101.54	101.572	96.2741	1.84081e-07	1.61888e-05	41.9976	0.017713	1
Hmox1	115.952	124.127	107.241	121.009	110.404	114.037	117.489	118.659	108.032	118.18	118.066	116.119	1.88901e-07	1.64589e-05	41.9407	0.0132682	1
Rps15a	91.6005	95.3147	87.8884	87.317	95.7736	96.1296	89.2214	93.2643	84.9844	86.4267	90.0629	90.0024	2.06865e-07	1.78587e-05	41.7408	0.00697191	2
Rps27a	93.2094	95.8061	92.4208	92.0663	96.7258	101.111	90.643	93.3472	87.1462	90.7512	94.823	93.5076	3.16055e-07	2.70371e-05	40.807	0.00520033	2
Lipa	130.17	129.707	133.427	120.404	129.688	131.714	126.718	129.581	130.203	126.202	130.485	126.482	3.80246e-07	3.22353e-05	40.399	0.00520136	2
C3ar1	109.761	107.878	103.697	99.8318	96.7447	106.59	104.283	109.069	106.096	95.9202	100.406	96.328	4.83422e-07	4.06161e-05	39.8686	0.00676886	1
Creg1	111.883	112.153	120.794	118.706	114.701	118.889	103.626	107.179	110.736	104.436	105.837	104.203	5.12034e-07	4.26393e-05	39.7414	0.00721915	3
Anxa1	107.903	116.22	117.577	106.813	101.679	107.831	105.957	110.928	111.71	108.736	103.454	97.736	5.24973e-07	4.33333e-05	39.6862	0.0071597	3
Pkm	112.371	117.189	113.515	102.297	111.618	117.843	112.496	107.476	115.271	98.6812	108.156	100.989	6.82593e-07	5.58539e-05	39.1051	0.0112662	2
Gm10925	67.1645	66.7736	67.2943	66.4179	67.3422	63.9005	67.3104	65.9517	66.133	70.1093	68.0615	64.3357	8.05096e-07	6.53099e-05	38.7393	0.00984481	1
Rps20	86.6449	89.5387	90.9676	88.096	93.2916	93.8381	86.1887	87.843	87.1331	87.1819	90.7127	83.7836	8.55755e-07	6.88261e-05	38.604	0.00533278	2
Ncf4	128.245	145.452	109.38	124.015	120.357	117.208	115.275	125.517	114.657	111.844	116.229	112.924	9.28715e-07	7.40611e-05	38.4225	0.0218931	1
Rpl35	88.6822	93.112	92.3743	83.6027	88.956	96.3786	88.7616	88.4504	88.1753	83.3782	85.1997	87.2885	9.83678e-07	7.77849e-05	38.2949	0.00789259	2
Pcna	125.939	126.421	120.192	103.107	122.88	111.549	116.474	117.061	116.11	101.105	111.455	103.948	1.15352e-06	9.04548e-05	37.9411	0.0164247	1
Rpsa	96.8533	97.1162	97.7311	90.0366	98.7975	99.9531	90.664	93.9647	91.8197	87.2553	91.4482	91.585	2.19242e-06	0.000170501	36.5113	0.00579269	2
Rpl28	86.9555	84.5453	85.3312	86.5204	90.976	93.1631	77.7813	83.2742	80.1381	81.7822	89.1092	85.9408	2.76412e-06	0.0002132	35.9939	0.00672784	2
Msn	129.461	145.067	125.983	124.871	131.684	132.826	128.654	130.345	123.915	127.042	120.399	121.824	3.70588e-06	0.000283515	35.3381	0.0133301	1
Rps16	86.2587	91.8893	85.1097	84.4299	91.1002	93.1562	82.3366	87.6599	82.019	84.8713	88.0322	87.5527	4.19768e-06	0.00031855	35.0589	0.00579966	2
Rpl17	91.2968	93.1096	87.7134	92.6737	97.7256	93.7424	88.6532	92.1978	85.3949	91.9035	98.0091	92.432	4.50888e-06	0.000339428	34.8986	0.00527727	2
H2-T22	89.65	96.4091	132.019	97.6084	96.8319	95.1108	92.5526	103.929	113.031	103.207	91.9824	99.7281	4.8874e-06	0.000365003	34.7178	0.023763	3
Rpl13	87.6745	89.5768	85.9171	82.8259	89.4039	93.2449	85.0422	85.7491	81.1904	84.4918	87.063	85.6531	5.46092e-06	0.000401463	34.4687	0.00567573	2
Ifi44	113.562	140.222	166.18	131.281	120.781	131.202	149.5	206.5	175.8	136.797	128.352	104.705	5.45682e-06	0.000401463	34.4704	0.0188776	3
Pdia3	98.8535	103.332	118.296	106.126	110.486	115.132	104.515	101.846	123.26	100.23	104.949	110.324	6.13457e-06	0.000447491	34.2074	0.0128987	3
Aldoa	118.758	125.104	121.622	112.37	123.332	122.74	115.272	119.733	119.645	113.262	113.575	119.183	7.17484e-06	0.000519348	33.8551	0.00577733	2
Actg1	94.7251	98.0876	100.21	99.0837	99.9557	102.477	95.835	97.7499	99.0627	102.418	99.2167	96.1436	8.69027e-06	0.00062424	33.4236	0.00271406	2
Sirpa	138.148	136.617	135.018	126.482	126.877	128.63	124.015	128.027	128.072	125.968	125.586	117.352	9.23025e-06	0.000658005	33.2877	0.00474996	1
Tapbp	121.661	120.668	134.293	139.814	127.454	128.529	106.594	115.971	129.448	126.304	120.473	124.136	1.07259e-05	0.000758879	32.9489	0.0135928	4
Rpl12	96.2987	95.0828	95.381	86.6919	94.748	100.025	93.5758	96.768	90.8026	86.8	89.184	90.4316	1.17757e-05	0.000826934	32.738	0.0085814	2
Gng5	124.231	134.558	122.804	115.672	121.776	121.069	124.861	134.004	124.055	118.272	118.051	124.274	1.22123e-05	0.000851242	32.6558	0.0118921	1
Rps17	78.2652	80.5028	83.6693	80.1452	84.977	88.0997	75.6225	81.4009	78.2791	76.2193	82.798	79.059	1.59829e-05	0.00110588	32.0469	0.00709474
Rps7	92.6745	95.2259	87.7197	90.6587	99.0557	97.2403	89.8579	92.0053	87.0297	88.4195	93.4938	85.6782	1.61307e-05	0.00110796	32.0261	0.00803062
Ctsz	107.312	111.146	110.524	107.322	103.762	103.006	99.652	105.817	101.466	101.646	102.946	96.2372	1.83661e-05	0.00125236	31.7319	0.00378527
Gpx3	145	117.568	126.045	162.477	120.738	122.273	104	101.8	110.4	97.5833	126.182	121.571	1.87952e-05	0.00127239	31.6795	0.15761
Rpl30	95.1048	91.2233	87.4474	91.5577	97.3095	97.785	86.5684	89.4622	85.6484	89.7775	90.3598	87.5133	2.38583e-05	0.00160362	31.1378	0.00579956
Ddit3	135.447	125.057	125.227	112.524	100.592	104.091	115.672	118.517	110.224	121.265	93.8817	93.7228	2.72085e-05	0.00181583	30.8389	0.0334116
Ctsa	121.212	116.194	119.032	122.977	116.054	117.849	112.526	113.713	113.662	106.841	101.289	102.436	2.77214e-05	0.00183703	30.7964	0.00492506
Lpl	128.5	118.269	125.656	112.478	115.626	116.405	124.283	132.116	134.706	109.596	119.447	119.08	2.94262e-05	0.00193637	30.6605	0.00638362
Tlr2	100.73	130.586	103.517	133.441	94.5714	106.725	110.423	128.942	121.133	110.822	118.569	99.0909	3.2446e-05	0.00212026	30.4379	0.0650382
Igf1	108.697	114.198	102.17	95.6877	108.634	108.198	103.338	116.588	104.725	103.769	92.8904	96.6512	4.069e-05	0.00264064	29.9211	0.00979734
Cluh	83.5263	172.162	111.128	115.2	175.281	185.957	134.351	141.394	139.314	129.235	128.19	127.625	4.50255e-05	0.00290198	29.6896	0.161356
Rpl31	92.3292	93.9618	94.0182	91.4013	93.8318	100.697	91.8459	93.7447	92.8625	87.3177	93.5635	90.1952	4.59641e-05	0.00292486	29.6424	0.00447635
Rpl32	79.7605	81.9455	80.8519	75.9969	80.8162	85.1887	76.6732	80.5625	77.1749	74.3861	77.655	76.3982	4.6002e-05	0.00292486	29.6405	0.00408947
Eef1b2	90.8738	89.222	90.5934	84.8132	98.3935	100.742	84.4889	88.9948	87.3	84.4155	88.7106	98.2579	4.71957e-05	0.00298061	29.5819	0.0135946
Igfbp4	94.3026	94.3503	121.16	113.887	109.469	107.193	96.3622	82.6624	111.986	106.456	109.951	101.766	4.8129e-05	0.00301582	29.537	0.0322457
Rps18	86.3127	95.8315	85.6589	83.6221	85.9115	92.0477	85.8685	88.9742	83.2544	81.5159	89.7393	85.3552	4.83941e-05	0.00301582	29.5245	0.0063975
Eef2	97.19	99.1291	98.1989	100.409	98.8903	106.015	92.3147	95.504	92.1178	96.386	97.7928	92.3272	4.99652e-05	0.00309324	29.4513	0.00533056
Txn1	112.109	118.846	118.275	105.844	110.108	111.96	111.514	116.726	114.392	111.174	110.169	116.818	5.55859e-05	0.00341871	29.2071	0.00980761
Ahnak	122.102	117.027	134.256	134.547	135.067	136.511	123.68	123.062	132.047	126.863	129.369	123.106	6.5658e-05	0.00401196	28.8249	0.0131022
Rps26-ps1	77.6761	81.7666	76.7311	85.5483	87.8146	94.4751	79.3431	76.1875	79.1226	75.3419	90.5067	86.9	7.58398e-05	0.00460421	28.4935	0.0185989
Gas6	96.1176	97.5762	101.109	110.493	107.097	109.092	104.64	100.816	101.549	109.878	110.416	99.1854	7.70568e-05	0.00464811	28.4569	0.0124592
Mt2	93.4487	99.4078	101.211	127.992	94.0893	112.056	106.25	105.913	96.1639	112.781	124.42	81.2727	8.1428e-05	0.00488049	28.3299	0.0457672
Ccl3	121.6	130.804	111.644	101.506	123.093	98.5319	103.965	109.306	118.984	112.07	104.384	101.158	8.37445e-05	0.00498757	28.2653	0.0385612
Cops9	103.354	104.431	108.92	98.3779	99.3322	101.565	103.165	108.253	100.182	97.1981	100.591	92.5195	9.4569e-05	0.00559682	27.9852	0.0162327
Fau	87.4024	89.0919	85.7774	86.9457	92.2235	91.4535	85.3928	88.6429	83.8762	86.2179	89.0824	83.846	9.82047e-05	0.00577566	27.8981	0.00323719
Rps21	89.9169	93.8794	90.3882	87.5037	90.967	96.4451	92.3863	91.6788	89.2352	86.9602	87.1071	86.5759	0.00010063	0.00584521	27.8419	0.00496644
Ube2l6	118.558	117.982	143.654	116.824	122.727	118.671	115.174	130.088	134.36	120.581	111.809	106.81	0.00010003	0.00584521	27.8556	0.0214439
Fcgr4	104.724	89.8101	128.636	116.44	102.093	105.754	93.2368	94.125	123.632	107.774	105.882	101.08	0.000105861	0.00611139	27.7248	0.0364321
Ifi203	143.364	164.105	161.604	154.718	137.567	134.239	117.944	115.765	125.093	113.212	115.837	111.079	0.000132287	0.00759037	27.2095	0.0253584
Cox17	113.586	115.609	98.2154	91.8	120.366	107.128	108.489	114.445	111.691	103.649	110.056	106.984	0.000135179	0.00770932	27.1594	0.0305162
Pgam1	115.375	120.908	115.269	108.075	109.084	114.507	112.741	121.623	108.921	105.739	105.568	111.181	0.000142235	0.00806284	27.0416	0.00927669
Ndufb8	90.439	88.7063	82.3158	86.646	92.9492	104.309	87.4157	84.279	85.484	84.3179	83.7849	88.06	0.000145161	0.00813074	26.9943	0.0211223
Rps14	80.5702	82.5885	81.1872	79.2839	82.2768	86.5389	79.0328	82.3794	76.8519	81.0772	83.2472	78.5899	0.000145036	0.00813074	26.9963	0.00381143
Rps19	90.1991	85.4371	81.1435	81.8915	87.0165	87.7909	84.7892	86.1117	79.7623	82.043	85.3359	82.0635	0.000155165	0.00863968	26.8398	0.00374178
Rpl27a	88.2192	89.485	83.3149	87.4346	86.7667	92.2018	84.2066	86.5886	84.447	83.8836	91.5159	81.9729	0.000161967	0.00896536	26.7402	0.00438868
Cd74	119.173	117.813	119.322	140.539	125.419	120.204	111.159	94.7143	126.816	133.035	118.108	106.851	0.000165174	0.00903655	26.6947	0.025327
Pabpc1	88.2023	93.8992	84.0326	84.382	89.6047	96.3725	87.2802	86.7726	83.9114	85.7085	89.7179	94.7871	0.000164264	0.00903655	26.7075	0.0084705
Hsd17b12	110.985	121.439	118.853	88.0723	120.512	123.592	116.1	118.402	108.841	101.376	108.848	96.4286	0.000166454	0.00905395	26.6767	0.0543315
Taldo1	101.238	110.99	115.523	101.174	106.792	106.895	107.283	111.337	114.222	97.7143	108.869	101.186	0.00016796	0.00908337	26.6558	0.00850808
Pgd	105.746	122.214	107.393	108.435	118.536	123.391	110.874	119.589	109.403	109.714	107.653	104.602	0.000189953	0.010214	26.3698	0.0167321
Sod2	99.8133	130.545	105.589	99.4835	109.615	116.145	106.632	136.859	102.148	107.457	111.476	108.87	0.000192887	0.0103129	26.3341	0.0403898
Tmem205	83.3421	83.9423	104.943	91.6538	103.586	93.8837	86.9844	78.6446	82.1429	95.0345	95.6979	94.614	0.000217087	0.0115412	26.0589	0.0440929
Anxa5	119.956	121.362	120.271	109.087	110.311	116.59	116.138	123.683	114.252	110.612	113.892	113.717	0.000230303	0.012175	25.9211	0.00920494
Rpl18a	84.7477	87.1839	85.0068	87.4905	90.4803	92.3393	84.0637	84.7232	81.1696	81.502	86.9481	84.2459	0.000234338	0.0123191	25.8806	0.00398838
Rpl29	94.4521	95.949	94.5583	91.8677	98.9289	102.139	96.8315	96.4257	90.1343	90.7813	98.8949	92.307	0.000236856	0.0123823	25.8557	0.00600039
Rpl26	77.8936	81.1246	78.1763	79.3353	84.0674	84.6692	75.2375	79.1559	74.0201	76.6421	80.8821	74.7221	0.000238345	0.0123913	25.841	0.00432848
Psenen	138.218	136.562	141.75	142.97	115.561	121.015	135.589	140.256	119.698	143.481	123.469	110.53	0.000263015	0.0135987	25.611	0.0310061
Hnrnpul1	98.5132	110.689	124.608	90.6292	138.539	96.5584	112.447	95.5443	120.531	118.606	128.612	79.3846	0.000277694	0.0142508	25.4841	0.0545698
Rps15	93.6773	94.576	92.4654	91.4695	97.9649	98.2612	89.9318	93.8851	89.2132	90.0087	94.2654	92.4763	0.000278656	0.0142508	25.476	0.00412366
Hsp90ab1	96.9016	112.441	106.521	97.8116	105.327	99.8257	99.0714	101.175	107.094	99.5429	101.433	96.6307	0.000284114	0.0144514	25.4306	0.00817705
Bcl2a1b	116.874	121.7	107.279	111.828	105.171	104.359	114.596	118.25	109.836	112.33	114.815	95.8857	0.000296855	0.0148762	25.328	0.0169645
Cat	107.596	116.852	125.915	111.41	124.049	127.791	110.504	116.435	120.022	117.571	109.541	123.66	0.000294267	0.0148762	25.3485	0.0136502
Rpl38	90.6769	90.6724	92.3337	84.2397	89.9554	91.941	86.8212	89.9962	88.4809	86.9313	87.1486	86.5289	0.000297208	0.0148762	25.3252	0.00405983
Tgm2	124.818	120.724	99.3289	104.595	111.013	99.875	104.131	115.649	90.5321	121.519	105.64	99.3929	0.000301952	0.0150337	25.2881	0.0305412
Rps23	86.5822	86.6413	82.1543	83.3609	89.6063	87.1399	83.2772	84.4037	77.6631	77.7898	86.3245	82.2982	0.000307445	0.0152266	25.2459	0.00320664
Fcgr1	129.44	104.418	129.632	110.386	107.063	107.506	118	84.4242	128.415	111.934	102.574	96.4434	0.000309282	0.0152374	25.232	0.0136907
Clec5a	132.25	155.55	81.8438	93.15	96.8	104.133	110.914	136.264	92.9655	95	105.632	121.333	0.000321607	0.0157621	25.1404	0.199527
Rgs1	139.795	150.681	151.189	119.674	130.373	125.543	148.301	143.293	158.238	134.508	133.609	148.062	0.000332423	0.0162078	25.0629	0.0288079
Ptpn18	106.62	103.288	123.351	120.224	108.596	112.729	102.748	97.7783	109.525	107.057	112.846	110.684	0.000336413	0.0163178	25.0349	0.018641
Rpl6	96.5422	96.7871	92.9591	98.7345	99.8529	102.094	90.8551	98.8596	89.1227	94.7873	100.392	94.8329	0.000342027	0.016505	24.9961	0.0053755
Ifitm2	125.759	118.707	129.3	137.092	120.401	123.989	125.985	127.224	125.05	136.833	121.219	126.847	0.000348776	0.0167448	24.9502	0.0103657
Ms4a6d	120.853	116.246	128.763	114.359	105.567	109.397	106.523	105.329	127.286	112.275	101.613	96.2094	0.000351822	0.0168053	24.9298	0.0122989
Cep295	179	125.8	98	67	52.2353	53.5789	190	229.667	145.333	193	163.5	70	0.000357999	0.017014	24.889	0.239317
Rps3	93.1496	90.0526	86.316	88.7672	92.7694	96.0368	86.4898	87.5915	81.96	88.8239	88.2812	91.0912	0.000390768	0.018478	24.6833	0.00468907
Clec2d	170.071	163.559	195.168	193.042	171.891	190.426	162	200.25	192.155	191.863	173.679	193.75	0.000415974	0.0195716	24.5363	0.0377481
App	128.752	135.209	133.686	115.066	120.839	118.831	141.184	134.663	128.47	123.794	110.325	117.968	0.000428063	0.0200401	24.4689	0.0172681
Rpl5	97.0502	101	92.5561	100.212	103.912	106.093	94.511	93.2549	86.1583	96.1429	94.0127	93.6411	0.000477699	0.0222532	24.2104	0.00817643
Rbis	108.734	140.209	118.093	112.878	125.365	98.0606	111.905	111.045	101.44	111.026	105.275	118.159	0.000488954	0.0225542	24.1555	0.0444853
Rps4x	94.6408	90.8387	97.8655	97.655	98.621	98.1219	90.5362	91.2955	90.4843	91.7092	96.0738	96.9711	0.000486601	0.0225542	24.1669	0.0046926
Selenow	129.745	134.366	139.588	140.087	128.7	128.796	127.522	133.14	131.762	139.275	122.371	123.403	0.000492649	0.0226138	24.1377	0.0132844
Rpl41	85.8868	93.3516	89.5033	88.0182	87.0361	89.7235	87.3627	89.8369	87.8836	87.8341	84.3309	86.5737	0.000502003	0.0229313	24.0934	0.00275952
Eno1b	108.867	125.368	105.253	83.7458	88.7568	116.075	96.1881	97.2154	100.775	92.7752	98.1232	96.5974	0.00056112	0.0255079	23.8304	0.0658299
Lgals3bp	150.458	183.941	176.906	179.873	152.221	147.118	103.697	115.74	128.096	130.54	109.514	112.576	0.000578862	0.0260626	23.7568	0.0329956
Rpl18	91.9564	91.5456	87.5378	89.6079	97.3661	95.6871	89.7552	86.7116	85.5255	88.2434	90.65	93.957	0.00057731	0.0260626	23.7632	0.00651224
Mthfd2	121.852	136.444	115.836	120.294	102.333	89.122	128.568	124.754	112.963	101.571	92.5	125.667	0.000620083	0.0277856	23.594	0.0893714
Myl12a	122.945	119.374	106.991	109.682	118.4	122.007	112.966	117.902	105.232	110.1	110.487	113.329	0.000632687	0.0282161	23.5464	0.0120751
Tgfbi	118.833	137.421	108.75	98	61.9286	89.2308	115.088	114.731	92.3714	112.429	101.895	112.2	0.000644438	0.0286045	23.5028	0.145079
Srsf2	154.497	155.858	155.153	191.884	171.588	183.864	156.811	149.67	164.817	167.386	193.237	180.487	0.000671062	0.0295079	23.4068	0.0259787
Ubqln1	119.727	119.433	95.0476	113.909	89.194	123.547	97.5444	107.64	103.42	109.261	106.259	100.714	0.000668581	0.0295079	23.4156	0.0529765
Psma7	107.478	112.94	111.66	89.872	95.1006	104.349	98.9141	102.055	98.4972	114.469	105.773	100.512	0.000697932	0.0305467	23.3137	0.0245925
Sigmar1	158.182	100.491	84.125	102.851	106.029	112.977	100.591	110.667	96.1852	97.9464	108.341	97.3478	0.000711161	0.0309816	23.2692	0.0881408
Ociad2	93.1333	90.4828	199.2	130.065	87.5625	86.6471	124	109.875	93.6667	109.882	114.812	105	0.000762526	0.0330662	23.1036	0.190938
Sgpl1	139.867	120.599	126.43	120.546	126.863	124.903	124.018	118.386	127.237	126.309	124.678	115.883	0.000780008	0.0336691	23.0497	0.0120113
Rpl35a	88.0772	86.3305	84.5967	91.287	90.5	93.027	87.333	89.3422	76.8238	86.404	91.9946	86.9388	0.000786678	0.033802	23.0294	0.00430135
Fcer1g	120.291	123.435	116.416	121.46	117.367	118.541	117.858	116.576	111.668	118.208	114.467	112.605	0.000842032	0.0359705	22.8677	0.0026403
Rplp0	85.0792	89.4247	86.9732	82.6457	87.6921	88.5817	85.508	85.5419	84.0659	82.2272	81.6761	88.1921	0.00084479	0.0359705	22.8599	0.00347468
Rps5	78.1189	80.8009	81.909	79.0608	84.4169	85.0259	77.4246	81.5533	75.7484	73.9685	82.2954	80.4758	0.000853214	0.0361655	22.8363	0.00525818
Rps2-ps10	98.6152	105.109	100.896	95.7503	100.087	103.496	93.5333	96.6254	97.1372	93.186	92.1463	94.2564	0.000926075	0.0390779	22.641	0.00515623
Rps12	95.9142	98.8608	95.2113	90.137	94.941	103.596	95.4885	96.4399	96.4794	90.0803	85.9521	92.9878	0.000946181	0.039748	22.5898	0.00566302
Canx	119.571	123.005	128.699	113.225	121.121	125.505	119.095	124.513	125.106	119.418	114.972	111.512	0.000985198	0.0410208	22.4934	0.0107213
Cd63	101.986	100.884	97.595	98.5797	102.073	104.929	96.5401	100.741	97.6753	97.4619	97.1985	93.6442	0.000984851	0.0410208	22.4942	0.00252573
Spout1	96.1429	108.95	186.167	105.667	126.929	72.2857	125.947	109.692	141.812	105.133	129.25	95	0.0010191	0.0422456	22.4126	0.246292
Ybx1	92.6718	92.5228	87.2907	83.3882	90.1726	94.6947	79.1915	84.3164	82.8413	80.96	82.4228	81.9893	0.0010612	0.0437976	22.3158	0.00822855
Tomm7	93.9688	96.0218	95.7665	92.1181	84.4344	101.51	95.8446	99.4939	93.0102	94.6356	94.6667	88.3626	0.00107968	0.0443661	22.2745	0.0170948
Fxyd5	105.543	104.933	108.144	115.272	108.31	109.925	96.1039	99.8004	100.071	99.3679	100.796	98.6634	0.00111748	0.0457196	22.1922	0.00584159
Eif3f	87.0091	94.8922	87.8075	94.1821	105.472	98.1151	82.1731	85.7544	83.7701	92.1024	100.523	87.8017	0.00115158	0.0463327	22.1203	0.0138685
Mrpl32	122.067	135.19	74.5	83.3953	96	93.1698	95.4848	98.8947	103.519	120.174	84.1136	71	0.00114111	0.0463327	22.1421	0.0946246
Mtpn	118.246	129.523	119.152	108.962	119.273	115.214	119.39	121.234	114.054	115.78	113.106	112.925	0.00115216	0.0463327	22.1191	0.0124614
Pfn1	103.595	113.56	107.445	112.346	115.097	112.619	104.382	106.448	102.836	109.945	108.204	105.791	0.00114735	0.0463327	22.1291	0.00302931
Clec4e	106.625	150.085	117.485	96.7826	123.148	105.583	99.8125	163.571	100.583	108.444	128.607	69.625	0.00117503	0.047051	22.072	0.0989776
Lgmn	119.384	115.877	117.956	126.941	119.972	123.695	124.342	117.413	114.736	129.769	118.607	113.77	0.00123945	0.0494205	21.9441	0.00414979
Srsf6	183.667	168.392	164.305	140.971	130.508	133.5	154.263	161.733	160.488	144.985	150.646	151.067	0.00125788	0.0499439	21.9087	0.0475242
Mif	96.3729	101.624	102.701	89.3177	102.133	106.619	95.7429	97.8	97.9638	91.7403	90.245	100.619	0.00127487	0.0501947	21.8765	0.0129677
Rpl36a	81.7139	85.9584	84.0149	77.5162	83.244	93.9973	77.1821	80.4341	79.8467	79.9304	82.3958	80.8539	0.00127282	0.0501947	21.8804	0.00799721
Mt1	111.778	108.652	109.343	119.867	115.142	121.623	114.982	116.64	109.294	120.829	111.771	121.172	0.00130235	0.0510628	21.8253	0.00827658
Vav1	124.631	138.101	97	112.5	116.454	110.058	120.786	124.212	108.411	121.292	117.271	94.2787	0.00134646	0.0525736	21.7453	0.0290325
Rpl13a	87.5724	84.5148	87.0831	88.4541	91.9124	89	85.2725	85.0056	81.7183	87.2037	89.4602	85.2806	0.00135791	0.0528014	21.725	0.00413652
Malat1	57.596	120.588	59.6408	59.1466	108.036	105.848	69.2765	69.4667	65.6573	42.8393	119.333	53.1045	0.00136806	0.0529772	21.7071	0.0290202
Limd2	113.129	122.034	121.662	119.274	109.215	117.527	108.833	108.829	100.068	104.532	110.788	108.617	0.00140687	0.0542567	21.6399	0.0285487
Mid1ip1	122.808	125.943	142.533	107.443	98.3623	109.123	119.678	114.802	112.506	105.519	117.859	111.179	0.00143297	0.0548141	21.5957	0.0465425
Phgdh	116.737	137.768	83.575	104.2	103.286	125.333	114.444	108.95	88.3889	93.4839	70.8667	121.571	0.00143264	0.0548141	21.5963	0.144941
Kctd12	98.4833	112.021	120.981	142.773	125.287	132.255	119.901	120	113.382	132.129	130.828	138.897	0.001507	0.0574125	21.4745	0.0390446
Ywhaq	107.665	113.761	109.359	121.428	108.328	130.94	104.222	116.182	112.871	115.728	101.733	99.8714	0.0015135	0.0574274	21.4642	0.0192331
Tmbim1	116.414	136.984	106.092	143.18	111.113	130.027	126.421	128.046	121.324	129.052	138.606	113	0.00155883	0.0589101	21.3931	0.0400619
Uchl1	104.36	137.512	137.75	92.119	161.588	105.75	148		97.5	89.8571	140.8	136	0.00156547	0.0589241	21.3829	0.113739
Fgfr1op2	129.792	132.154	112.712	131.539	161.309	104.708	137.21	122.944	122.185	104.883	109.685	124.297	0.00160144	0.0600382	21.3281	0.0552541
Lgals9	107.129	113.509	131.847	124.364	110.732	111.283	109.632	103.856	123.257	118.981	108.205	99.9595	0.00166134	0.0620367	21.2396	0.0113399
Pitpna	123.293	122.764	104.385	115.79	112.056	120.465	112.156	111.183	110.259	115.011	108.715	106.713	0.00168027	0.0624954	21.2122	0.0115724
Emp1	123.821	103.351	112.592	101.05	101.118	112.344	108.276	110.411	100.706	95.25	112.632	96.875	0.00171023	0.0633594	21.1696	0.0166036
Atp6v0c	111.062	116.768	109.706	115.687	113.156	114.542	108.274	115.011	108.871	111.847	112.602	107.117	0.0017246	0.0636412	21.1494	0.00185521
Gas5	133.64	152.117	147.39	119.365	131.707	132.556	145.568	140.443	158.406	151.905	120.363	104.646	0.00173481	0.063768	21.1351	0.0287945
Alas1	108	123.493	98.358	93.2692	93.4348	100.096	103.721	122.284	105.456	117.574	102.694	109.25	0.00177286	0.0649128	21.0827	0.0437401
Ddx21	124.885	140.652	93.1707	104.72	137.6	91.5556	109.711	99.6207	122.762	104.95	86.9091	111.857	0.00178608	0.0651436	21.0648	0.0944609
Picalm	109.021	103.354	129.356	125.047	135.787	122.785	118.427	127.203	123.348	130.962	135.73	126.726	0.00180758	0.0654205	21.0359	0.0220965
Skp1	118.065	123.185	110.3	118.306	101.04	106.395	114.507	118.026	125.25	106.189	107.378	113.78	0.00180418	0.0654205	21.0404	0.0251079
Ciao2a	106.59	123.425	114.358	129.588	107.487	111.767	108.913	107.194	110.535	121.882	108.229	110.585	0.00186526	0.0672493	20.96	0.0260372
Ssh3	196.676	190.37	209.61	149.069	118.804	174.316	166.824	173.429	147.516	141.708	173.791	132.652	0.00188484	0.0676961	20.9347	0.0851004
Mfge8	128.033	107.696	122.13	128.58	122.04	128.689	97.6951	111.5	131.927	110.692	110.781	109.093	0.00193005	0.0690563	20.8773	0.0272195
Ptma	94.534	91.4472	90.7351	80.8841	89.3943	88.1769	88.8756	88.1971	90.8322	82.5234	86.2234	82.1905	0.00195633	0.0697312	20.8446	0.00520595
Hmox2	104.352	92.4038	118.176	102.978	95.8759	106.43	100.834	100.808	105.259	96.3566	93.7019	97.225	0.00197442	0.0701104	20.8223	0.0166712
Parp14	134.643	123.878	136.701	141.997	124.859	119.543	112.85	127.098	140.867	138.21	128.163	106.608	0.00200053	0.0705779	20.7905	0.0160421
Prrc1	100.722	120.381	178.556	97.375	106.825	110	126.636	107.242	120.892	130.842	103.5	112.143	0.00200258	0.0705779	20.788	0.0884598
Gm21188	106.189	140.914	158.429	138.894	117.496	109.957	118.085	127.6	151.196	136.451	126.982	123.136	0.00208188	0.0730192	20.694	0.0204082
Tuba1a	88.3867	84.3684	113.474	93.0811	98.8154	98.0656	92.5106	92.4786	92.0887	98.945	95.5652	96.7708	0.00208737	0.0730192	20.6876	0.0412103
Ctla2a	131.046	135.509	128.069	128.455	97.7143	109.133	98.6571	110.336	86.5211	81.7273	72.4	94.875	0.00212316	0.0739962	20.6463	0.0576714
Nap1l4	123.091	146.746	101.967	92.6111	128.917	99.16	114.276	103.107	103.558	120.702	88.5806	82.6	0.00215433	0.0748052	20.611	0.0713184
Cd14	70.5714	88.3575	97.641	100.543	98.2937	100.711	83.1545	106.39	100.859	92.8684	98.5922	93.06	0.00216843	0.0750181	20.5952	0.0241727
Dcbld2	118.789	154.98	133.343	145.542	114.773	92.7778	168.875	131.632	146.25	127	137.556	104.8	0.0022026	0.0759211	20.5572	0.120925
AW112010	112.111	98.625	156.794	134.429	123.244	116.638	133	118.222	143	146.282	119.846	115.886	0.0022423	0.0767273	20.5139	0.0451847
Rps13	94.7425	99.4713	92.581	96.602	101.337	99.9343	95.206	94.8497	88.8948	95.5203	101.636	89.3738	0.00223702	0.0767273	20.5196	0.00593052
Ifit2	141.318	106.838	132.921	121.829	120.643	117.695	123.273	160.8	130.888	117.715	116.416	118.92	0.00226754	0.0773099	20.4867	0.00573375
Cd37	128.918	132.578	125.635	136.856	139.744	142.565	134.101	129.865	141.605	138.275	131.565	118.042	0.00240362	0.0814077	20.3451	0.01858
Pgrmc2	79.7368	123.694	120.237	104.956	100.155	84.7111	103.788	91.1842	100.515	90.6944	96.5116	87.3913	0.00240503	0.0814077	20.3436	0.0711316
Gab2	68.6667	91.6047	90.7297	97.9737	109.028	128.523	123	103.606	99.7222	92.0645	98.8621	84.9375	0.00243123	0.0819995	20.3173	0.086826
Arhgef10l	200	117.545	177.667	132.833	99.8571	75.625	116	64.75	126.875	118.111	125.75	34	0.00245948	0.082218	20.2892	0.441069
Bcl3	88.375	138.163	135.091	86.85	72.5417	100.28	110.385	98.3864	116.143	99.1429	111.348	82.875	0.00246392	0.082218	20.2848	0.153673
Metap2	119.156	119.58	105.48	114.327	87.1163	106.151	108	101.643	112.353	111.63	111.153	122.372	0.00246156	0.082218	20.2871	0.0373612
Coro1a	87.8882	99.4711	108.566	112.079	110.566	109.659	99.8915	98.6304	105.547	106.33	105.757	104.968	0.00250121	0.0831675	20.2482	0.0174554
Cmc1	98.9149	101.23	132.771	107.446	87.5862	105.228	100.242	98.6724	105.692	105.283	100.104	98.1364	0.00256077	0.0845503	20.1909	0.0592109
Mpeg1	126.395	129.617	128.476	130.401	127.492	125.183	119.765	121.136	126.831	125.937	122.817	117.893	0.00255262	0.0845503	20.1987	0.0024805
Gm10275	92.6652	95.258	90.5436	79.3911	88.5574	96.9474	91.7486	93.0565	83.6178	87.5978	88.7594	95.2308	0.00259976	0.0855376	20.1541	0.0138042
Ly9	97.5128	113.638	94.4712	91.828	89.2339	95.5574	79.6667	91.0561	109.973	92.6993	93.2963	91.9091	0.002644	0.086389	20.113	0.0198942
Rpl7	95.6488	102.396	94.5201	105.387	100.098	102.753	90.4853	93.2629	96.1838	95.3823	97.9719	98.2633	0.00264106	0.086389	20.1157	0.00484249
Cycs	118.131	116.272	108.486	95.1561	101.665	111.75	101.807	104.581	103.772	102.087	103.495	112.013	0.00266795	0.0865704	20.091	0.0177169
Poldip3	117.542	145.849	98.5667	129.584	117.663	119.862	121.97	124.903	126.048	124.714	115.908	109.083	0.00266016	0.0865704	20.0981	0.0463091
Gpx4-ps2	93.9735	83.3354	96.4111	77.252	95.75	77.5159	80.295	84.4621	85.6037	87.1657	80.5154	82.5429	0.0026873	0.0868985	20.0734	0.0236715
Osbpl8	120.765	138.047	123.407	139.775	135.097	132.055	124.739	132.931	127.211	143.442	133.397	131	0.00271642	0.0875393	20.0471	0.00809331
Fam20c	112.52	119.107	107.544	98.7796	105.572	116.636	107.792	128.631	104.554	108.809	106.585	109.461	0.00274421	0.0881333	20.0223	0.0129176
Eif4g2	126.605	125.147	111.202	128.252	116.969	123.903	122.968	121.995	121.784	120.221	131.462	117.192	0.0028537	0.0913379	19.9268	0.00893579
Serpinb6a	113.962	107.082	105.698	112.961	109.705	116.657	110.613	107.618	108.513	115.966	108.615	105.832	0.00289009	0.092189	19.8959	0.00373211
Capn2	117.037	120.693	124.432	103.821	130.41	122.144	108.513	110.203	125.377	105.595	117.445	111.878	0.00290636	0.0923946	19.8822	0.0254899
Cpd	136.685	142.898	119.517	114.228	110.441	108.026	120.126	142	110.757	114.852	109.7	129.235	0.00294293	0.0932424	19.8516	0.0456358
Zdhhc12	145.56	149.207	100.16	138.158	79.1429	129.333	120	112.192	85.4762	94.2381	108.667	106.385	0.00296475	0.0936184	19.8335	0.150254
Rpl14	91.9579	97.0451	92.7255	92.2246	100.196	98.8226	91.967	93.9535	84.8725	92.5955	96.2431	95.4858	0.00303119	0.0953964	19.7794	0.00553734
Hnrnpll	200.421	161.588	142.2	153.586	138.868	108.879	161.66	131.485	158.774	113.85	124.647	128.357	0.00311437	0.0973629	19.7131	0.0952326
Serpinb9	168.529	159.591	116.684	90	120.048	94.0741	111	151.562	123.95	129.143	120.583	118.4	0.00311297	0.0973629	19.7142	0.140816
Atf5	122.618	104.581	100.094	76	106.304	105.936	112.746	111.859	97.3077	91.9889	84.675	104.978	0.00322223	0.100401	19.6298	0.030481
Ints14	106.929	133.867	132.167	129.65	67.5	86.6471	94.9231	92.1739	116.375	104.938	155.95	85.3846	0.00323295	0.100403	19.6217	0.155727
Psma2	106.946	109.861	87	101.037	93.9053	111.736	93.8947	113.63	107.076	97.4	100.582	92.1031	0.00336532	0.103828	19.5233	0.0176203
Ybx3	82.625	113.623	93.0833	79.4043	103.545	97.3279	93.7111	96.534	82.0556	79.4286	96.1111	85.129	0.00336394	0.103828	19.5243	0.0508446
Ap3b1	106.643	117.264	137.357	88.3857	83.3651	91.5962	99.7467	119.556	117.105	92.5156	111.115	91.3125	0.00338639	0.104079	19.508	0.0544917
Gbp6	95.7778	185.5	146.387	122.722	114.008	100.227	152.4	158	120.692	111.723	163.433	96.5	0.00340156	0.104079	19.4971	0.0550765
M6pr	103.926	117.189	100.325	94.4824	101.863	101.966	105.788	105.776	105.213	100.567	98.7237	98.0373	0.00340662	0.104079	19.4934	0.011807
Sp110	100.854	110.339	158.656	147.362	129.886	135.781	114.68	122.062	168.673	154.975	118.385	118.333	0.00343584	0.104632	19.4725	0.0257572
Nhp2	108.288	116.51	91.5167	108.3	100.463	90.1087	92.7222	100.174	84.9136	87.2456	87.6757	102	0.0035077	0.106476	19.4217	0.0535033
Gusb	116.575	111.26	123.592	115.629	120.295	122.973	106.785	106.945	108.65	113.408	110.479	108.018	0.00353933	0.106747	19.3996	0.00692597
Psmb8	91.3689	92.7574	107.258	94.5819	91.4934	88.2646	83.7815	85.2366	104.382	94.1247	82.1949	86.4523	0.00353756	0.106747	19.4009	0.011042
Cfl1	102.593	102.533	100.339	96.8086	99.6898	100.947	96.9815	101.298	96.4089	94.3194	94.0857	95.2353	0.0036471	0.109646	19.326	0.00246159
Atxn10	121.718	109.57	119.333	98.729	100.524	126.313	109.773	112.419	98.6667	114.323	120.433	110.186	0.00371159	0.11123	19.2829	0.0396768
Csde1	114.917	117.294	105.019	99.5806	107.139	114.688	104.041	116.203	105.186	105.706	113.081	102.008	0.00386064	0.115329	19.1861	0.0134923
Zbtb43	74.375	114.867	107.25	114.556	219.909	211	130.778	116.846	95.5	93.9333	112.75	137.8	0.00390292	0.116223	19.1593	0.319321
Ap2s1	108.672	100.883	110.178	114.063	112.827	115.315	100.572	105.217	112.445	110.814	111.139	111.237	0.00399133	0.117357	19.1041	0.0103043
Ccl5	126	157.2	146.615	159.289	141.901	124.962	126	157.333	180.667	161.5	137.48	173.111	0.00400337	0.117357	19.0967	0.0757806
Cxcl14	124.243	127.955	113.029	102.846	111.729	117.869	145.028	120.567	119.864	118.824	107.615	115.5	0.00398593	0.117357	19.1075	0.0298554
Dnaja1	91.4922	107.824	127.858	112.1	110.98	102.764	99.1667	111.449	103.719	102.038	99.0082	91.6852	0.00399602	0.117357	19.1012	0.0212709
Gsn	115.973	111.943	112.604	97.7604	104.303	116.048	101.965	106.244	112.142	99.019	106.28	99.4767	0.00399645	0.117357	19.101	0.0118492
Arpc2	114.338	114.736	108.865	102.422	116.721	110.611	112.11	111.084	110.394	101.129	106.551	102.672	0.0040816	0.119279	19.049	0.00546915
Mindy1	103.809	112.366	139.891	102.889	136.763	115.798	111.53	110.899	100.522	129.9	111.333	95.2647	0.00425802	0.123839	18.9447	0.0378138
Rps7-ps3	81.122	90.6731	100.658	94.4074	82.65	121.348	85.2	77.125	83.6667	97.6667	104.333	70.3333	0.00426395	0.123839	18.9413	0.0937687
Hip1	178.946	149.035	140.625	117.459	136.605	105.368	111	140.382	148.889	117.683	128	137	0.00433244	0.125441	18.902	0.0707939
S100a4	99.3421	104.593	105.035	96.0362	100.581	107.516	98.7814	99.3655	99.25	97.251	89.2718	95.3721	0.00437682	0.126337	18.8768	0.00442494
Atp6v0d2	134.108	124.045	117.23	123.542	108.409	116.371	115.713	120.143	112.847	122.939	114.491	121.089	0.00443083	0.126769	18.8465	0.0136273
Mgll	66.5	129.611	105.6	140.483	143.971	166.76	124.455	134.529	125.4	103	99.3529	112.562	0.0044322	0.126769	18.8458	0.102982
Scpep1	111.057	95.8803	113.48	107.29	99.7103	109.316	107.096	108.005	113.181	110.383	104.011	101.906	0.00441815	0.126769	18.8536	0.0117614
Rcbtb2	106.037	95.6	108.07	112.174	115.949	110.765	102.183	98.4372	118.723	110.304	102.47	102.398	0.00447566	0.127403	18.8217	0.0137989
Zfp553	95.6667	91.8333	171	76.25	199.667	73.75	116.818	119.667	119.75	97.8571	97.7	121	0.00448145	0.127403	18.8185	0.607047
Abcc5	174.4	163.182	223.407	266.897	192.023	203.048	177.903	154.683	183.81	184.108	227.778	231.235	0.00453236	0.12748	18.7906	0.0878064
Emc7	114.944	116.457	119.137	102.964	105.028	102.651	106.144	115.66	110.141	109.773	105.192	106.342	0.00453235	0.12748	18.7906	0.0203141
Nrbf2	110.045	112.25	68.4737	166.125	104.35	100.759	112.379	130.636	84.1667	141.852	122.909	82.0714	0.00452356	0.12748	18.7954	0.139225
Snx18	111.56	136.415	114.179	104.031	101.469	79.1176	117.385	99.4186	113.31	120.973	120.097	149.545	0.00453834	0.12748	18.7873	0.0890394
Zdhhc20	138.532	120.3	123.216	127.538	188.211	124.389	136.217	165.475	116.344	145.85	172.619	176.5	0.0045905	0.128561	18.7591	0.0732776
Ass1	100.974	130.742	108.902	97.0515	104.978	96.1912	108.66	105.949	107.336	103.646	104.828	107.224	0.00462543	0.129155	18.7403	0.0452665
Cd300lb	122.705	131.425	144.13	134	101.013	117.207	132.062	121.188	109.358	124.294	121.325	119.591	0.00469865	0.130812	18.7015	0.0382443
Gmfg	82.5165	103.85	82.6279	109.111	103.023	104.197	89.6587	102.157	89.5	110.19	99.3194	92.4211	0.00473615	0.131467	18.6818	0.0394131
Hexb	136.874	126.26	122.937	109.416	116.437	117.844	135.605	126.546	110.535	96.8676	110.495	116.532	0.00479415	0.132685	18.6517	0.018467
Cotl1	88.5117	90.8345	80.4469	84.6152	86.8408	92.1345	85.6314	77.6376	90.6371	87.4617	88.1653	85.3258	0.00487348	0.134485	18.6111	0.00572472
Uso1	83.7955	124.267	123.4	86.3036	112.976	106.511	102.316	92.4324	113.29	115.581	69.92	94.8947	0.00493041	0.135658	18.5823	0.0556356
C5ar1	105.619	113.24	106.631	115.992	117.079	112.385	106.408	106.356	119.277	115.98	121.59	120.329	0.00498831	0.136851	18.5534	0.00744518
Il1rn	125.55	120.327	96.3231	103	99.5833	92	82.8182	137.375	88	93.8846	132.407	99.4	0.00503025	0.137601	18.5326	0.0599762
Naca	116.054	106.404	97.0842	99.5639	101.878	99.429	96.7219	99.3071	95.1993	96.8497	97.0153	91.3455	0.0051411	0.140225	18.4786	0.00851156
Pnp	111.765	113.664	123.211	114.419	109.51	105.084	107.527	104.695	127.58	109.541	102.231	105.787	0.00517875	0.140844	18.4605	0.00849149
Tpi1	115.813	110.145	103.766	101.647	101.237	101.099	104.119	107.05	103.495	100.804	108.851	92.6735	0.00519564	0.140896	18.4524	0.00900997
Nme2	98.1522	102.012	104.723	92.3327	99.4108	104.287	99.7205	101.557	100.88	95.9438	93.375	95.1055	0.00529458	0.143167	18.4056	0.00687033
Myl6	100.575	106.205	103.244	99.5976	97.9804	103.328	100.834	101.292	100.895	100.038	101.832	101.677	0.0054336	0.146505	18.3413	0.00321213
Epb41l2	144.107	164.63	147.796	140.368	132.125	92.92	162.36	164.565	103.477	132.969	130.481	100.538	0.00549472	0.14689	18.3135	0.0583232
H1f2	105.012	98.9931	111.846	125.413	119.116	112.613	111.067	113.183	112.523	116.845	105.253	128.079	0.00549002	0.14689	18.3156	0.0294937
Tmsb10	97.5148	95.8947	102.391	94.0198	91.6252	95.1808	97.963	93.1109	99.3457	97.152	93.3551	96.7029	0.00546407	0.14689	18.3274	0.00443547
P4hb	97.9813	107.133	118.452	108.639	108.629	108.745	101.677	105.079	113.887	95.8982	96.9828	102.619	0.00560459	0.148981	18.2643	0.0110092
Ubr7	89.7857	129.667	62.2857	129.783	126.591	113.211	89.75	96.6923	93.6	99.1765	71.619	89	0.00559011	0.148981	18.2707	0.145006
Apbb2	148.833	129.49	97.5714	108.222	101	101.742	124.279	121.944	126.371	102.96	117.84	90.8571	0.00565062	0.149781	18.2439	0.0916781
Rtn4	119.017	126.152	133.654	124.428	130.494	130.029	118.25	129.395	125.107	117.137	117.553	123.954	0.00574206	0.151778	18.204	0.0046821
Smu1	107.679	122.702	96.3333	90.1154	81.5082	101.273	85.6154	103.875	114.705	120.389	86.4186	107.541	0.00579551	0.152761	18.181	0.0502237
Pde8a	117.773	104.458	185.067	175.261	148.818	110.364	130.312	135.407	111.765	96.0952	116.8	96.4545	0.00588058	0.154155	18.1447	0.131483
Rnf128	121.957	130.842	123.857	109.278	104.246	121.281	120.137	112.658	126.769	114.421	111.143	114.864	0.00588115	0.154155	18.1445	0.0247875
Atpsckmt	142.429	104.75	125.312	110.3	199.048	116.444	126.706	153.667	107.667	131.714	146.4	118	0.00592413	0.15485	18.1263	0.210771
Rbx1	123.701	120.509	104.946	116.925	107.299	117.118	117.115	111.25	104.31	106.526	108.704	96.5248	0.00598889	0.156109	18.0993	0.0129558
Cd72	121.622	118.522	152.62	127.451	119.278	123.505	115.598	112.672	142.336	116.972	112.091	104.66	0.00605948	0.157079	18.0701	0.0153136
S100a6	100.821	103.346	102.305	96.4709	100.479	104.562	97.9692	101.84	97.8697	96.7656	93.0878	96.1083	0.00605872	0.157079	18.0704	0.00318814
Ctdsp2	108.444	103.051	154.577	137.8	119.434	103.167	115.548	97.087	115.821	127.595	117.746	136.769	0.00610223	0.157753	18.0525	0.0537278
Arhgap45	163.02	136.444	172.528	130.913	147.683	158.243	154.74	155.816	155.308	147.735	141.577	103.268	0.00614959	0.158542	18.0333	0.0272406
Atp1a1	107.103	111.004	98.0052	94.8544	108.197	118.658	99.4651	98.9767	100.603	105.612	91.0991	102.39	0.00632045	0.162501	17.9649	0.0166034
Relb	94.3529	143.964	175.25	98.1818	126.821	97.5789	100.789	151.759	119.5	104.25	130.673	125.542	0.00634557	0.162703	17.955	0.0801564
Zyx	83.2931	110.871	133.316	109.478	114.984	112.32	97.6026	91.1064	119.689	133.762	122.933	109.32	0.00638725	0.163326	17.9387	0.0475827
Rcl1	53.3333	142.556	104.5	118.5	82	69.4444	111.286	103.429	61	105.778	81.5	37.3333	0.00640935	0.163447	17.9301	0.36592
Oas3	123.885	116.838	140.971	114.028	115.307	127.451	90.3429	116.423	134.76	125.153	102.51	112.159	0.0064768	0.164721	17.9039	0.0163656
Il18bp	89	97.75	170.8	159.231	128.304	118.369	129.333	55.75	146.25	155.524	113.652	112.211	0.00650924	0.1651	17.8915	0.0877032
Mgst3	113.71	105.631	111.975	93.0692	119.556	111.831	110.257	118.452	117.671	102.132	104.23	102.562	0.00655731	0.165709	17.8731	0.0256797
Shkbp1	77.4286	113.139	82.4375	93.95	103.63	135.037	116.758	122.63	133.778	132.188	108.278	99	0.0065685	0.165709	17.8688	0.116031
Shisa5	119.917	114.868	125.051	123.594	116.198	116.558	109.122	115.57	116.757	119.777	115.806	114.5	0.00680469	0.171209	17.7805	0.0063186
Ift52	110.296	145.742	89.25	130.64	109.323	68.8889	119.667	112.909	118.867	134.5	95.7368	98.25	0.00684561	0.171779	17.7655	0.115361
Dab2	118.151	124.67	144.895	135.093	129.767	121.618	114.202	114.306	134.704	131.749	133.8	106.2	0.00692336	0.172323	17.7373	0.009876
Lamp2	129.291	124.69	131.894	133.28	120.413	126.116	127.133	126.002	128.913	133.092	119.639	115.511	0.00697637	0.172323	17.7182	0.00495892
Pttg1	88.0833	108	132.25	133.733	90.8085	132.923	120	101.316	138.6	128.077	117.833	84.4667	0.00697715	0.172323	17.7179	0.0864289
Tcn2	106.908	111.053	115.325	120.339	109.94	124.163	106.794	107.872	103.468	108.74	117.78	113.488	0.00690707	0.172323	17.7432	0.0195841
Thap4	125	110.167	104.96	92.6471	99.5333	59.2222	82.8462	130.529	109.077	68.4	97.619	102	0.00693053	0.172323	17.7347	0.177347
Ypel3	148	131.875	150.311	144.857	174.796	137.396	149.508	154.233	150.674	158.776	137.597	132.244	0.00695816	0.172323	17.7248	0.0388701
Slc48a1	122.606	122.21	115.261	111.15	111.667	120.845	112.564	117.801	110.472	111.882	106.087	116.528	0.00703459	0.173287	17.6974	0.00916964
Atp5md	112.02	116.24	103.616	101.486	109.296	107.489	112.622	109.708	106.979	100.409	105.255	106.983	0.00712561	0.174615	17.6652	0.0114858
Cbx3	93.5	98.2262	93.1731	123.343	120.254	120.65	115.517	117.925	132.183	123.757	111.302	106.621	0.00712172	0.174615	17.6666	0.0455325
C1qa	102.176	97.6889	105.169	112.771	103.715	112.905	98.1484	94.4615	92.3896	98.8571	102.548	99.5618	0.00716821	0.175202	17.6503	0.014575
Pomp	128.247	124.88	123.659	110.195	113.124	116.759	116.326	123.403	127.753	115.22	109.947	117.383	0.00726087	0.177007	17.6181	0.0136047
Aurkaip1	99.6	119.098	107.87	98.268	107.6	97.6863	91.9106	99.2885	108.784	99.8416	104.263	93.15	0.00734062	0.177664	17.5907	0.0290756
Lrch4	122.757	95.898	115.974	99.3151	124.693	108.753	111.66	104.163	123.463	89.6364	90.2586	101.121	0.00735754	0.177664	17.585	0.0470186
Prdx6	115	125.469	115.827	103.333	104.459	128.535	106.213	123.592	107.473	103.077	98.4674	104.765	0.00735754	0.177664	17.585	0.0275195
Tpd52	114.958	121.667	124.996	117.926	111.648	127.072	114.004	122.328	113.5	123.674	114.436	122.452	0.00736333	0.177664	17.583	0.009709
Elof1	127.545	103.28	104.889	117.556	110.111	118.323	110.842	100.833	113.06	114.837	120.151	100.958	0.00738264	0.177674	17.5764	0.0540813
Bsg	101.026	99.1347	112	111.353	106.973	105.6	91.7557	92.1462	101.695	99.0762	93.1134	98.8936	0.00746979	0.178857	17.547	0.0106088
Rdx	91.4	118.441	115.278	142.904	117	98.9434	101.631	115.483	98.7455	111.532	123.024	120.067	0.00745819	0.178857	17.5509	0.0540028
Lrpprc	105.524	150.317	124.267	83.2812	152.611	120.9	109.676	101.522	118.242	133	137.529	113.714	0.00749306	0.178959	17.5392	0.107603
Cpe	139.821	157.235	158.1	168.69	143.969	159.782	136.5	135.6	152.882	158.245	137.556	133.077	0.0075561	0.180007	17.5182	0.040835
Rps26	91.0466	92.0885	90.0893	91.4582	98.3538	94.0946	87.6636	88.2237	87.5796	84.9402	93.2939	88.4781	0.00762024	0.181077	17.497	0.00460932
Tanc1	216.667	62.0909	123.4	94.7857	67.1667	129.857	140.222	119.75	91.5714	34.6667	175.2	124	0.00765272	0.181391	17.4863	0.397416
Uqcrc1	111.097	98.4843	116.27	93.2597	107.523	112.658	115.754	98.4437	102.345	104.136	102.135	86.6833	0.00768165	0.181619	17.4768	0.020781
Asns	132.206	138.29	91.0889	110.51	101.485	115.455	115.638	132.414	80.775	135.447	91.4167	101.778	0.00776291	0.18308	17.4504	0.0695236
Ifnar2	116.528	109.3	123.415	128.465	118.272	125.838	107.294	110.639	97.1695	111.239	114.748	101.476	0.00782453	0.184072	17.4306	0.0156188
Nmd3	102.238	107.977	174	160.625	93.7059	88.8667	109.184	105.774	112.391	103	105.211	89.6154	0.0078803	0.184922	17.4127	0.110909
Isoc1	96.4667	104.786	161.381	110.356	115.895	114.087	107.353	115.833	138.143	108.725	118.727	139.118	0.00793141	0.185658	17.3965	0.0910811
Crim1	112.444	160.4	128.889	95.2308	95.5714	139.133	95.6667	121.778	111	131.5	116.75	151.75	0.00795949	0.185853	17.3876	0.271681
Eif5a	100.84	106.56	103.551	96.6278	107.47	104.508	91.6807	103.483	101.331	98.0726	97.1354	103.048	0.00799338	0.186182	17.3769	0.00635586
Ap3s1	113.068	128.478	126.218	119.543	133.386	98.0952	114.154	128.843	127.462	124.31	118.264	82.55	0.00802252	0.1864	17.3678	0.0259997
Prdx4	120.99	112.466	121.579	133.269	123.521	120.043	101.513	98.6044	87.2778	90.0103	96.6667	106.871	0.0080703	0.18686	17.3529	0.0221903
Rps9	86.7479	89.2673	88.0056	89.705	92.838	91.7586	82.8475	85.3423	83.4591	87.3761	90.5964	85.3402	0.00808203	0.18686	17.3492	0.00256417
Dcaf5	80.1875	90.2	74.4	130.476	146.235	121.947	106.188	133.857	108.933	94.7895	114.045	93.2	0.00811616	0.187189	17.3386	0.152093
Samhd1	118.875	108.685	130.984	133.808	117.417	123.386	109.585	95.828	139.289	113.506	119.221	113.217	0.00815375	0.187596	17.327	0.00903388
Angptl2	132.34	126.709	107.843	107.375	106.377	111.25	126.68	128.019	111.372	121.198	121	115.468	0.00830012	0.189114	17.2822	0.0308611
Arfrp1	191.458	137.205	173.905	154.182	109.719	128.194	110.524	116.206	145.4	122.579	131.2	181.3	0.00827394	0.189114	17.2902	0.101112
Ccl9	108.121	121.11	115.138	120.572	110.245	111.757	103.405	120.394	112.451	111.145	109.718	100.883	0.00829	0.189114	17.2853	0.00943006
Slc43a3	128.364	245.538	94.75	80.75	111	134	119.154	129.692	123.222	114.471	169.667	189	0.00828808	0.189114	17.2859	0.37578
Mboat7	90.1111	105.929	144.743	124.158	90.587	112.553	111.093	108.316	118.781	90.4643	130.065	86	0.00841934	0.190906	17.2463	0.0660779
Glrx	110.724	117.927	100.357	114.524	116.718	111.371	120.066	121.373	108.752	105.79	100.531	84.6667	0.00847647	0.191739	17.2293	0.0176711
Hspd1	129.843	110.112	110.915	99.3158	92.8182	91.0795	106.096	108.811	101.04	97.4737	103.537	103.275	0.00854374	0.192797	17.2094	0.0271442
Cln5	90.3115	124.517	109.088	119.286	95.4458	99.6364	106.952	122.289	94.7231	93.7	95.6557	94.0714	0.00862853	0.19332	17.1845	0.0370356
Mecr	65.4545	124.619	141.062	62.2	133.857	122.333	144.812	85.1818	127.769	103.684	121.533	103.571	0.00859731	0.19332	17.1936	0.223294
Tada3	136.611	100.222	93.56	81.6522	85.375	146.682	103.333	132.042	111.926	113.88	85.4667	104.636	0.00861257	0.19332	17.1892	0.121909
Mdfic	105.685	124.564	108.645	111.802	97.1511	120.367	109.782	110.198	121.589	109.891	119.383	116.296	0.00869001	0.194235	17.1666	0.0205835
Fcf1	115.821	123.432	126.026	101.294	92.3265	85.4915	112.955	120.22	104.625	105.356	83.8	88.75	0.0087422	0.194647	17.1515	0.0610375
Hs1bp3	111.174	155.75	115.323	117.182	106.077	96.931	111.047	106.341	111.464	124.812	99.7188	133.611	0.00876419	0.194647	17.1452	0.0892979
Pop7	170.846	107	92	96.4545	159.353	118.083	137.321	102.963	118.083	108.793	90	99	0.00877047	0.194647	17.1434	0.126054
Gm28043	118.667	160.333	183	197.333	94.5417	87.3636	106.222	95.6	113.357	85.2308	106.429	254	0.00881748	0.195229	17.1299	0.225394
Ankrd28	89.5909	127.103	111.071	180.556	148.2	142.083	162.643	141.667	159.556	165.053	163.333	95.2857	0.0088997	0.196587	17.1065	0.136852
Afdn	163.348	160.649	108.571	136.3	110.353	179.647	134.306	136.48	121.958	144.387	134.75	122.273	0.00899709	0.198273	17.079	0.121128
Rpn1	114.655	111.844	107.959	92.3688	108.245	111.872	95.746	97.5306	115.028	84.871	92.6182	89.2069	0.00909792	0.200027	17.0509	0.0245337
Mapk6	118.477	128.042	117.698	134	105.791	135.436	116.588	123.593	121.667	120.487	117.404	126.548	0.00913831	0.200037	17.0397	0.0617382
Tmx3	144.976	116.283	96.439	121.012	129.467	145.167	145.426	121.733	119.288	132.51	129	115.182	0.00914093	0.200037	17.039	0.0529162
Mtdh	114.12	135.309	104	114.885	119.549	115.5	129.569	124.243	99.9508	113.51	102.982	88.725	0.00918998	0.200644	17.0255	0.0414246
Eif3c	93.6288	104.843	98.7832	87.1005	91.3665	104.633	99.4634	94.8187	90.2632	97.2	91.7177	95.1429	0.00927288	0.200811	17.0028	0.0166858
Ms4a6b	103.077	127.468	165.432	135.933	124.666	124.409	95.5686	96.3556	134.036	131.716	120.396	103.986	0.00925339	0.200811	17.0081	0.0138729
Sod1	91.5641	87.7632	95.5243	88.4615	97.214	96.9636	89.3965	94.1197	87.4924	87.405	86.4206	85.2564	0.00928298	0.200811	17.0001	0.00994156
Vipas39	118.716	138.484	128.644	117.02	119.628	104.207	111.475	124.605	118.571	115.122	112.012	96.8667	0.00922514	0.200811	17.0159	0.0248407
Dhdds	146.333	122.452	89.619	110.556	132.04	109.909	113.054	120.733	107.926	112.483	102.238	123.176	0.00940816	0.202588	16.9662	0.11948
Tlr4	135.686	118.341	109.45	117.746	102.099	105.6	105.4	80.68	101.973	112.475	112.48	116.515	0.00940079	0.202588	16.9682	0.0612571
Slc17a5	143.109	112.594	102.125	113.776	125.462	130.42	126.255	101.172	112.921	143.49	144.7	128	0.00949947	0.204087	16.9418	0.0508763
Vamp3	124.325	120.432	93.875	131.886	123.043	131.361	116.571	124.621	110.169	131	110.236	96.375	0.00982758	0.210655	16.8559	0.0288135
Arl6ip1	106.367	110.413	114.187	106.443	118.871	115.373	115.598	105.156	112.107	115.593	113.594	101.789	0.00993611	0.212015	16.8281	0.0128459
Arsb	120.535	124.557	122.466	107.122	127.671	121.511	117.326	119.2	110.955	126.17	109.506	107.911	0.00992292	0.212015	16.8315	0.0237398
Gm13710	186.25	64.8889	214	150	111.611	175.5	133.571	130.5	291	144.375	106	126.714	0.010036	0.213663	16.8028	0.357506
Zfp598	190.5	173.69	119.3	176.952	153.286	116.412	150.929	135.118	147.833	162.55	132	94.6667	0.010068	0.21386	16.7947	0.124405
Zbp1	59.75	100.182	122.741	120.381	112.596	100.506	132.067	81.6429	124.486	105.226	105.588	94.955	0.0100935	0.213918	16.7883	0.0220609
Fcgr3	95.6252	88.8487	93.5199	98.5756	90.3761	94.9604	98.9331	91.7506	110.825	96.593	98.5287	100.573	0.0101229	0.214058	16.781	0.00558435
Smpdl3a	112.429	122.557	121.206	116.298	107.392	122.139	107.491	126.724	130.35	111.512	102.193	104.611	0.010185	0.21489	16.7655	0.0086688
Eri3	112.917	165.371	111.629	125.707	129.71	134	127.575	109.786	125.9	148.419	110.5	105.714	0.0102426	0.21514	16.7512	0.0863462
Marchf9	222.5	124	101.538	50.4286	132.733	119.125	70.2222	188.667	89.1429	111.833	60.6	121.333	0.0102262	0.21514	16.7552	0.257773
Alox5ap	110.326	108.156	114.174	104.481	114.981	115.607	105.641	103.064	110.903	113.314	108.532	108.933	0.0103157	0.216194	16.7331	0.00647066
Zranb3	187.905	149.275	116.59	134.133	73.3333	140.304	110.314	123.812	137.898	138.426	81.0833	103.143	0.0103451	0.216327	16.7259	0.12033
Slc27a4	98.7	85.5909	129.68	154.947	113.188	111.324	95.9375	111.13	89.0645	98.9286	95.52	99.6154	0.010379	0.216555	16.7176	0.109266
Oas1a	109.597	110.336	143.837	123.296	126.009	126.685	110.912	118.685	133.734	119.927	122.007	113.541	0.0105774	0.220208	16.6696	0.00999375
Rpl9-ps6	98.2341	97.9136	91.2033	95.669	103.007	100.761	96.2403	94.4741	95.0118	92.6354	96.1475	95.1121	0.0108982	0.226384	16.5937	0.0063724
Ppp1r12a	103.606	164.851	134.763	142.617	155.294	117.757	141.894	118.139	131.281	129.289	161.5	148.588	0.0110822	0.229034	16.5512	0.0568769
Psmb4	108.34	113.992	102.581	101.576	97.7005	106.287	102.765	99.6959	102.777	104.475	98.7386	92.973	0.0110988	0.229034	16.5474	0.0135412
Sdc3	115.74	112.937	131.333	121.971	125.294	125.255	112.358	108.975	129.265	125.839	116.865	118.547	0.0110689	0.229034	16.5542	0.00716014
Atg16l2	167.7	210.917	186.167	90.8182	180.455	200.556	179.444	218.2	162	179.538	98.3333	80.3333	0.0111286	0.229146	16.5406	0.280349
Herc1	150.579	178.28	147.462	165.533	232.696	216.522	161.357	165.857	135.222	146.389	121.579	162.5	0.0112052	0.23022	16.5231	0.132185
Rpl23	88.629	90.1616	88.1952	86.6641	90.3622	90.3172	86.1032	88.2904	84.8519	83.3623	84.8346	84.1233	0.0113294	0.231914	16.4951	0.00173724
Tent5c	117	77.1266	124.143	98.5714	109.8	115.9	89.0465	106.554	106.471	116.765	98.6875	123.917	0.0113369	0.231914	16.4934	0.0926596
Trmt13	253	230.667	184.333	276.5	145.75	87.5	127	167.6	156.5	102	119.25	197.6	0.011425	0.233025	16.4737	0.784463
Ube2w	103.076	137.592	145.667	121.571	112.706	118.857	107.721	125.976	112.529	136.444	113.056	134.8	0.0114408	0.233025	16.4702	0.0499097
Tlr13	115.356	117.534	107.567	107.388	110.144	104.034	114.491	123.044	106.807	102.822	113.523	92.3956	0.0114671	0.233058	16.4644	0.0152307
Slamf7	124.318	133.889	143.048	115.514	113.85	101.731	120.857	106.692	92.25	84.92	106.079	111.389	0.011577	0.234784	16.4401	0.0578876
Cxcl10	108.25	148.516	116.603	110.561	96.6008	103.274	81.8333	142.125	131.679	110.489	102.296	109.211	0.0116945	0.236656	16.4144	0.0247204
Atf3	121.083	132.119	125.144	124.505	121.086	117.702	121.759	130.791	124.143	117.792	115.725	120.5	0.0118658	0.238075	16.3773	0.00866067
Atxn3	125.593	152.711	108.2	132.281	173.8	101.233	163.225	113.476	124.96	130.882	116.429	131.077	0.0118125	0.238075	16.3888	0.0840451
Icam1	119.547	147.165	127.283	135.189	122.071	144.695	122.511	148.405	122.286	122.084	132.891	114.694	0.0118658	0.238075	16.3773	0.0323024
Utp23	123	138.4	111.455	66.1429	70.125	100.182	108.273	93.4706	104.769	89.75	130.667	95.1667	0.01182	0.238075	16.3872	0.25605
Dcakd	129.793	153.471	101.857	93.5	144.174	102.812	122.783	121.588	105.281	116.727	103.5	62.5714	0.011901	0.238273	16.3698	0.108409
Nr2c2	162	214.4	94.4286	102.333	109.818	237.571	147	146.875	194	179.25	156		0.0119367	0.23848	16.3621	0.454504
Tgtp2	134.667	119.167	146.103	123.119	120.358	105.889	123.3	116.833	141.176	109.254	120.695	114.124	0.0119672	0.238583	16.3556	0.0160036
Cyp20a1	155.28	123.52	133	85.1667	114.444	146.591	122.926	96.7308	99.0526	153.158	111.118	97.9	0.012117	0.241059	16.3239	0.129555
Stap1	142.632	141.717	110.819	124.148	119.896	115.833	118.634	142.495	110.881	106.205	105.185	98.766	0.0121517	0.241239	16.3166	0.0318063
Tomm34	94.5417	145.42	152.5	157.472	159.97	140.03	154.324	128.85	130.724	120.182	142.029	146.643	0.0121961	0.241611	16.3073	0.0803317
Ifrd1	150.079	149.93	143.204	176.512	145.519	121.973	149.25	143.636	158.492	142.404	115.667	119.818	0.0123991	0.245117	16.2652	0.0424679
Iigp1	66.3333	176.2	196.125	145.496	131.044	131.183	171.667	108	154.707	128.288	140.9	122.385	0.0125013	0.246619	16.2443	0.04475
Ptprs	165.967	129.325	230.652	136.298	170.952	178.829	151.349	176.778	158.179	157.216	134.378	147	0.0125693	0.247442	16.2304	0.0744514
Hmgn1	97.4509	101.481	116.434	100.627	113.778	103.606	103.276	99.5354	107.116	102.487	95.0544	97.2718	0.0126558	0.248107	16.2129	0.0136818
Ube2s	81.4719	105.14	96.7273	108.173	85.0132	89.6429	101.305	91.6098	105.92	101.696	95.9867	68.1304	0.0126369	0.248107	16.2167	0.026938
Lrp1	161.107	151.417	159.534	151.426	167.511	163.968	140.965	141.387	156.86	144.975	147.814	157.389	0.0127613	0.249654	16.1917	0.00913752
H2-Q6	119.638	121.8	103.241	127.233	129.561	120.583	112	112.694	91.1739	114.652	116.02	110.733	0.0128026	0.249942	16.1834	0.0330274
Atpaf1	80.7857	137.267	140.583	151.048	173.3	125.462	91.7	151	112.909	136.867	106.16	116.364	0.0128919	0.250646	16.1657	0.151081
Pgp	129.103	119.341	75.5484	99.2105	105.966	120.667	102.804	100.357	101.487	78.5	106.207	114.462	0.0128862	0.250646	16.1668	0.0864534
Tmx4	140.976	125.719	104.317	118.176	148.481	117.05	128.644	116.645	96.7963	141.604	102.194	132.2	0.0130196	0.252606	16.1405	0.065346
Xdh	120.13	150.391	150.911	152.361	171.912	151.35	131.981	137.222	122.455	123.351	140.541	129.929	0.0131852	0.255294	16.1081	0.0146972
Stat1	101.333	107.983	122.9	109.713	106.762	105.263	88.0179	115.534	115.581	106.392	101.485	97.2816	0.0133341	0.257458	16.0794	0.0069638
Tmem185b	104.417	120.061	76.3793	137.207	144.8	112.409	106.829	119.5	124.25	111.542	119.071	117.778	0.0133517	0.257458	16.076	0.0820205
Flna	147.473	136.569	141.025	123.651	143.384	136.417	123.953	121.287	129.111	125.665	133.771	126.263	0.0134973	0.259733	16.0483	0.012984
Rps11	85.7209	86.7854	88.8464	88.3304	90.5853	91.4181	82.6302	84.2411	85.7135	86.5497	88.9153	83.9754	0.0136281	0.261234	16.0235	0.00310173
Tmem242	99.5522	93.4535	94.2222	96.225	76.4615	86.4783	90.7113	96.7812	107.75	102.228	92.5231	81.6585	0.0136308	0.261234	16.023	0.036499
Eno1	108.597	108.041	107.472	96.1214	102.217	107.146	100.381	101.199	104.333	91.6964	96.8341	96.0097	0.0137082	0.262005	16.0085	0.00608227
Npc1	125.736	127.37	105.928	120.686	120.804	131.172	117.693	128.565	116.879	120.303	109.645	117.455	0.0137267	0.262005	16.0051	0.0201322
Mrc1	108.439	111.053	115.905	121.912	130.371	124.333	126.965	128.463	113.451	121.985	114.674	118.235	0.0138276	0.263396	15.9863	0.018291
Pik3ap1	125.383	113.053	116.024	124.049	108.539	118	107.885	106.325	111.157	110.849	111.661	102.508	0.0138924	0.264096	15.9743	0.00733104
Haus5	417.4	211.4	106.167	160	121	112.833	165.909	170.143	125.889	93	97.5	143.75	0.0140054	0.265707	15.9536	0.56977
Nucb1	125.926	131.006	145.937	142.358	145.419	136.717	119.357	117.925	129.427	126.085	112.935	97.3774	0.0142744	0.269723	15.9048	0.0200312
Pip4k2b	103.444	89.1333	151.636	113.297	129.6	126.541	113.024	108.857	114.533	127.788	143.217	114.762	0.0142587	0.269723	15.9076	0.0807491
Rdh10	30.7143	106	108.727	140	103.8	112.933	112.75	99	127.273	141.667	174.688	121.5	0.0143727	0.271035	15.8872	0.269274
Cd300a	117.242	95.8618	115.434	111.972	102.735	107.714	104.376	96.8849	105.478	104.527	110.909	94.7184	0.0144034	0.271051	15.8817	0.00868326
Cenpa	117.321	117.222	103.875	145.156	177.895	122.5	132.93	119	141.739	159.63	129.6	145.25	0.0144599	0.271051	15.8716	0.0766745
Gm28661	57.1076	55.6106	57.3333	56.693	55.139	52.3119	56.0602	57.9254	55.8154	57.4181	55.3053	51.6534	0.0144594	0.271051	15.8717	0.00801601
Abcc1	93.7568	134.443	133.898	90.2727	138.417	108.618	121.972	112.341	108.605	112.514	121.553	131.824	0.0145576	0.271193	15.8543	0.0666148
Fcgr2b	88.16	111.9	101.083	128.636	119.488	121.567	91.8767	105.284	105.75	135.714	124.339	116.108	0.0146091	0.271193	15.8452	0.0516132
Lat2	140.963	132.871	126.527	127.178	122.78	119.196	118.957	121.268	123.893	113.882	126.903	122.923	0.0146116	0.271193	15.8448	0.0118245
Nampt	131.182	144.386	120.646	133.265	108.885	124.584	123.243	124.753	118.545	117.541	114.36	117.177	0.0145738	0.271193	15.8515	0.0217441
Pcyt1a	90.1556	115.309	114.062	127.447	129.847	102.857	102.645	101.861	110.5	130.113	114.787	92.8485	0.0145191	0.271193	15.8611	0.0395539
Crbn	108	137.067	118.583	131.538	101.1	81.5854	119.261	135.969	124.52	122.513	112.308	118.6	0.0148109	0.274351	15.81	0.100701
Mecp2	155.235	114.538	114.6	99.1111	103.85	83.6316	112.455	92.5385	103.75	114.095	162.222	71.5	0.0149007	0.274933	15.7945	0.138548
Tfdp1	129.258	134.176	102.621	135.696	162.4	172.5	136.395	123.273	146	153.458	177.286	130.5	0.0148794	0.274933	15.7981	0.0999882
Phf11b	114.4	127	141.615	103.835	112.076	96.6508	114.8	84.3333	118.769	100.685	101.146	81.3125	0.0150065	0.276343	15.7763	0.0455962
Tollip	101.592	109.474	145.868	113.525	117.133	118.444	113.583	107.545	100.347	110.264	97.8913	102.087	0.0150492	0.276589	15.769	0.0392263
Pigx	175.143	113.256	155.824	111.16	107.727	139.261	115.5	109.05	114.826	96.85	151.556	113.789	0.0152603	0.279377	15.7331	0.104193
Rbm26	243.444	275	122.571	214.125	168.909	214	202.882	215.444	170.846	184.267	192.778	127.8	0.0152407	0.279377	15.7365	0.437124
Atp5a1	101.495	111.213	102.405	110.357	112.258	107.694	105.531	104.433	102.475	103.902	109.293	100.409	0.0154084	0.281541	15.7083	0.00747301
Hacd4	108.682	96.3441	101.356	116.435	115.435	116.292	106.255	101.756	98.3684	114.642	114.607	126.106	0.0154685	0.281545	15.6983	0.0227182
Slc23a2	131.848	151.52	134	181.9	152.804	132.527	134.509	133.014	118.229	119.516	152.897	101.8	0.0154479	0.281545	15.7017	0.0418712
Bcap31	102.655	110.726	121.861	125.052	117.545	116.951	114.241	108.605	119.231	117.578	102.13	108.197	0.0155344	0.282199	15.6873	0.0131275
Inip	159.571	132.667	108.793	128.7	81.3077	122.133	114.769	108.87	117	129.75	129.1	117.889	0.0156385	0.283543	15.6701	0.123387
Ociad1	115.431	121.071	123.285	106.817	115.362	105.888	107.333	107.698	110.912	117.656	118.368	109.202	0.0158583	0.286424	15.6341	0.0155719
Rnf130	101.13	105.234	124.127	108.795	110.829	116.392	108.369	113.553	118.348	108.526	119.251	104.581	0.0158343	0.286424	15.6381	0.0132864
Snw1	98.8125	118.711	101.058	89.1818	84.9554	96.7526	96	88.8537	109.04	79.8533	87.2676	78.2368	0.0161356	0.290874	15.5895	0.0347204
Hdac3	148.043	177.037	108.52	150.235	146.296	152.208	148.962	123.625	135.682	89.65	131.727	176.053	0.0164222	0.293232	15.544	0.0936388
Man2a2	159.727	107.565	152.154	164.319	135.353	145.45	123.522	116.333	160.286	152	131.545	163.111	0.0163833	0.293232	15.5502	0.105069
Ncaph2	110.81	114.89	116.411	129.557	116.907	89.3649	101.08	94.8571	121.242	98.5616	117.278	89.3333	0.0163333	0.293232	15.558	0.0324126
Npm1	103.34	104.74	94.1419	90.3719	91.3063	91.5634	89.5549	109.397	102.018	89.9882	84.6316	85.5644	0.0163373	0.293232	15.5574	0.010037
Plaa	124.536	125.188	101.4	104.366	94.8571	86.3659	100.269	128.324	114.981	121.881	107.76	110.15	0.0164032	0.293232	15.547	0.0637174
Endod1	117.419	101.444	126.741	122.413	80.6	110.778	105.5	111.641	110.732	130.585	89.5769	128.312	0.0165151	0.294332	15.5295	0.0699526
Atp6v0d1	114.28	121.015	104.782	114.953	106.214	108.55	103.982	104.392	115.65	111.264	104.735	109.827	0.0167589	0.297164	15.4916	0.010273
Tmem171	91.1667	99.2407	136.75	103.986	110.523	113.026	98.8235	119.13	109.267	95.236	103.55	98.1667	0.0167364	0.297164	15.4951	0.0419922
Wdr5	135.818	121.053	103.056	104	181.474	121.543	137.104	120.5	139.783	125.048	95.4615	127.737	0.0167688	0.297164	15.4901	0.0855807
AI662270	144.256	119.16	111.814	124.286	120.273	149	117.944	117.288	149.411	117.305	166.357	116.1	0.0168183	0.297482	15.4825	0.0428878
Rpl23a	78.9355	80.6475	77.0547	75.7738	82.3321	81.1744	74.859	76.3534	74.4942	74.4301	78.5078	75.0155	0.0168896	0.298183	15.4716	0.00294192
Coq5	95.5714	128.6	82.4667	175	105.857	147.333	112.156	103.821	103.316	137.261	93.0769	121.462	0.0170752	0.298852	15.4433	0.142994
Pgam5	111.036	122.045	102.241	148.929	114.818	109.667	114.091	127.48	128.667	116.333	78	91.6667	0.0171161	0.298852	15.4371	0.0872154
Senp7	91.8571	171.154	156.75	140.091	199.619	112.778	132.889	102	84	128.312	128.4	183.667	0.0170541	0.298852	15.4465	0.275831
Slc31a2	125	155.985	114	118.842	140.864	126.902	146.677	123.824	125.167	117.147	138.843	106.444	0.017117	0.298852	15.437	0.0473528
Tbc1d5	124.389	89.5333	142.273	127.345	149.75	139.556	119.182	110.6	122.375	132.655	101.65	110.769	0.0170277	0.298852	15.4505	0.126644
Tfpi	152.625	110.348	149.7	184.458	112.867	115.714	123.632	95.1111	137.125	76.8333	121.1	71.3333	0.0171181	0.298852	15.4368	0.145631
Nectin4	91.8	140.846	64.4167	90.7805	121.564	132.206	104.778	88.3333	134.1	94.2222	98.6	105.067	0.0171675	0.29916	15.4294	0.10641
Cybb	135.806	137.082	142.293	139.829	131.355	127.567	132.819	139.126	146.491	145.25	127.961	122.607	0.0172532	0.300097	15.4165	0.00951049
Elp5	112.781	116.673	114.83	108.053	88.9756	129.875	120	107.146	111.077	120.367	91.6154	113.364	0.0173718	0.301603	15.3988	0.0596852
Cmtm7	142.915	115.743	107.892	120.593	116.506	130.207	114.147	108.966	111.849	105.463	113.7	120.204	0.0174298	0.302052	15.3902	0.0254804
Pelo	150.917	121.556	197.917	88.5556	85.6	91.7778	94.1429	106.364	74.3	104.429	91.2	71	0.0174854	0.302458	15.3819	0.210711
Sec61g	88.6991	101.054	100.6	92.9639	91.8395	101.053	94.9	103.679	106.826	89.1372	93.0703	88.0375	0.0176011	0.303902	15.3648	0.0148024
1810037I17Rik	123.691	127.883	105.739	126.377	110.323	130.08	117.147	121.79	124.312	123.506	126.534	104.727	0.0178041	0.305723	15.3352	0.0315538
Dap3	148.043	136.889	134.636	140.061	110.026	131.065	122.744	115.806	134.312	111.292	138.182	88.2	0.0177879	0.305723	15.3375	0.0842721
Med22	129.45	107.107	142.632	148.8	145.562	105.667	156.622	137.769	146	98.8	129.63	103.5	0.0177868	0.305723	15.3377	0.0929556
Atp6v1b2	125.949	126.23	120.33	117.067	111.835	120.525	126.407	114.416	123.917	114.761	111.695	115.973	0.0179696	0.306946	15.3112	0.00699141
Cnbp	136.093	137.242	125.283	120.98	133	134.724	132.853	129.955	129.011	138.73	130.686	128.223	0.0180127	0.306946	15.305	0.0104972
Cox10	121.571	134.278	119.556	64.75	97.625	166.571	110.167	90.2857	75.75	75.2	93.2	104.375	0.0179524	0.306946	15.3137	0.259554
Psmd8	102.399	108.914	102.215	99.433	100.563	105.864	101.156	107.375	95.5763	99.7378	94.1047	94.3824	0.0180384	0.306946	15.3013	0.00554596
Usp7	129.594	147.707	129.622	105.634	162.361	105.56	110.373	133.478	124.739	125.508	93.4419	136.636	0.0179867	0.306946	15.3087	0.0617288
Procr	118.5	128.542	119.211	56.375	73.9091	88.1667	78.6667	101.4	97.6667	83.8333	129	88.5	0.0182549	0.310069	15.2704	0.198317
Phf2	107.727	123.667	103.947	130.143	131.875	98.8571	134.36	135.053	98	132.476	119.84	109.667	0.0183918	0.310712	15.251	0.148068
Rabl3	93	121.688	120.429	173.556	79.2	57	132.857	131.071	148.6	127.6	120	139.286	0.0183405	0.310712	15.2582	0.299181
Tecpr1	113.328	120.471	152.773	133.219	136.857	146.929	111.062	126.785	127.078	139.853	128.629	115.512	0.0183664	0.310712	15.2546	0.0259874
Add1	127.758	135.078	106.411	152.257	124.889	117.867	130.5	118.328	117.826	102.776	127.536	105.086	0.0185763	0.312706	15.2251	0.0354898
Tnfaip8l2	122.962	109.906	118.516	99.6564	104.194	109.275	103.623	116.417	102.236	98	104.464	98.1875	0.0185621	0.312706	15.2271	0.0238296
Cystm1	129.5	125.154	110.182	67.25	62.3333	76.7143	159.25	126.429	144.667	100.222	103	103.5	0.0187664	0.314913	15.1987	0.316639
Ippk	117	137.75	174.5	42.25	70.4286	62	117.4	111	116.5	125.8	109.273	58.5	0.0187743	0.314913	15.1976	0.474925
Ddx3x	134.246	116.131	143.25	144.768	123.312	132.218	141.084	129.328	132.06	131.514	139.045	122.449	0.0189555	0.317387	15.1727	0.0200431
Tmem59	102.604	105.606	114.174	111.114	100	116.332	108.426	112.245	105.667	113.535	98.699	114.28	0.0191965	0.320851	15.1398	0.0121216
Gpr137b	136.862	139.723	131.732	153.305	141.007	153.026	137.163	137.973	136.196	131.628	147.092	141.539	0.0192915	0.32132	15.127	0.00729716
Pgm2	91.1176	127.08	153.958	119.045	111.964	150.9	109.52	112.077	97.3333	134.32	109.65	108.933	0.0193544	0.32132	15.1185	0.110354
Slc37a2	130.306	122.65	118.763	109.881	115.278	124.042	115.81	113.673	124.271	116.323	119.644	102.389	0.0193611	0.32132	15.1176	0.0111159
Tdp2	121.8	178.154	83	98.3	119.833	108.364	136.333	112.8	108.625	85	125.3	145.4	0.0193578	0.32132	15.1181	0.23997
Cds2	102.205	140.157	122.354	115.887	122.768	154.013	113.043	129.314	134.951	135.761	109.06	116.655	0.019407	0.321513	15.1115	0.0388471
2610301B20Rik	167.778	127.067	107.2	141.8	66.3333	104.167	125.4	146.375	183	110	97.8182	152.75	0.0195337	0.322478	15.0946	0.206775
Csrp1	96.54	98.2643	92.9565	101.51	98.2027	116.636	83.5088	95.6719	104.829	104.49	84.3805	89.4918	0.0195225	0.322478	15.0961	0.019504
Hfe	96.9167	115.041	131.281	114.815	110.545	124.621	106.7	103.053	123.214	136.118	146.2	84.2381	0.0198114	0.326489	15.0579	0.0512172
1600012H06Rik	102.778	128.029	122.679	160.065	107.688	124.022	145.1	120.125	146.81	114.842	130.138	111.727	0.0199394	0.328024	15.0411	0.0808662
Gga2	121.2	135.172	126.517	96.975	143.853	100.04	118.4	129.032	117.138	114.545	140.129	81	0.0200111	0.328057	15.0318	0.0634252
Rtcb	102.471	102.19	92.78	94.6557	92.5789	108.964	111.227	106.657	108.453	101.439	108.564	91.3571	0.0199975	0.328057	15.0335	0.0397713
Ms4a7	115.358	117.895	115.078	122.955	117.968	117.502	105.003	117.005	110.254	120.162	110.531	109.582	0.0202489	0.330717	15.001	0.00140078
Myd88	123.791	126.222	145.929	113.726	101.472	112.649	123.281	116.833	133.778	123.63	102.964	85.5385	0.0202589	0.330717	14.9997	0.0382646
S100a1	123.561	125.577	117.925	110.71	126.417	117.312	120.108	125.219	120.589	123.683	112.92	112.704	0.0202788	0.330717	14.9972	0.0139508
Clec4a1	144.25	96.8947	100	136.895	133.598	109.108	120	102.5	100	129.286	103.105	128.486	0.0205129	0.333836	14.9673	0.0454932
Osbpl11	132.667	127.426	124.739	148.839	122.377	94.0952	122.538	92.2286	113.533	127.524	125.225	116.636	0.020541	0.333836	14.9637	0.0558347
Fam241a	139.933	138.538	154.702	132.714	119.255	97.5862	142.471	124.769	127.05	137.643	136.238	130.444	0.0207519	0.336102	14.9371	0.0612175
Lrrc25	87.3871	101.176	111.86	108.131	113.128	105.875	103.085	96.2637	105.512	106	103.503	101.99	0.0207325	0.336102	14.9395	0.015121
Mrfap1	103.65	100.078	111.482	104.086	110.956	103.251	102.416	100.38	106.555	108.042	105.534	113.888	0.0208406	0.336381	14.9259	0.0096796
Rad9a	135.2	160.36	99.2857	100.808	153.696	162.812	140.423	139.182	123.235	114.7	122.071	146.889	0.0208374	0.336381	14.9263	0.136939
Hint1	114.201	106.835	108.815	100.991	104.453	108.997	103.789	104.303	102.26	96.8378	104.749	92.281	0.0208852	0.336524	14.9204	0.00707462
Tle5	108.96	104.883	113.092	107.486	111.076	111.725	100.009	108.573	106.224	108.627	107.762	110.692	0.020972	0.337344	14.9096	0.00673117
Slc7a8	130.5	131.762	126.038	113.533	115.405	124.158	110.788	130.77	115.168	124.802	121.4	111.818	0.0210614	0.338204	14.8985	0.0173642
Fxr2	118.071	134.735	92.625	172.333	100.077	127.382	130.444	101.722	99.619	111	122.226	123.571	0.0211677	0.339333	14.8853	0.0783438
Eif2d	103.455	93.5909	119.846	116.136	133.304	70.4783	130.762	79.0435	118.421	120.87	121.455	106.846	0.0212242	0.33966	14.8784	0.129377
Ddx20	148.4	127	167.667	56.1667	90.25	104.7	79.0667	96.0769	113.25	74.5	116.8	75.6	0.0213686	0.340739	14.8607	0.28039
Kctd6	111.571	174.429	212	120.615	113.786	131.692	110.111	150.556	168.167	147.333	134.059	140.143	0.0214365	0.340739	14.8524	0.221677
Rae1	149.962	133	114.129	140.32	98.1026	151.606	112.175	123.705	133.406	110.811	137.361	157.769	0.021392	0.340739	14.8578	0.0758051
Slc2a6	100.154	165.235	107.4	127.673	119.333	121.286	128	166.13	96.5625	131	125.344	141.923	0.0214355	0.340739	14.8525	0.090564
Bsdc1	83.1667	151.485	116.579	122.533	108.208	88.6897	104.333	115.367	108.632	115.72	109.333	105.615	0.0215224	0.341084	14.8419	0.0927621
Cmas	132.296	120.423	102.986	107.085	129.879	105.274	127.88	128.968	125.971	107.391	105.725	100.032	0.021567	0.341084	14.8365	0.0395641
Rpl22l1	87.0213	101.817	93.04	78.2958	93.6757	97.4783	92.3893	98.6168	96.8495	97	85.7241	101.25	0.021566	0.341084	14.8366	0.0230741
Zfp53	151.571	176.182	147.429	130.364	89.3077	62.8	164.643	73.7143	163.8	121.667	131.429	125.857	0.0216515	0.341847	14.8263	0.322311
Firre	277	347.385	346.667	271.625	348.25	277.25	362.667	308	316.5	340.25	318.25		0.0217027	0.342081	14.8201	0.361467
Zfp87	92.7857	78.5	101.833	115	161.778	138.769	104.692	79.3333	145.667	76.3333	140.727	150.667	0.0218114	0.34322	14.8071	0.231361
Sra1	107.314	121.048	110.782	110.705	80.5571	100.571	90.9189	92.5571	95.0426	86.8772	88.9649	98.5161	0.0219143	0.344263	14.7948	0.0378383
Armc7	137.412	163.05	83	136.688	118.184	133.375	115.7	110.571	122.875	105.636	111.962	105.333	0.0220217	0.344799	14.782	0.127431
Kdm4a	106	152.652	82.4615	95.3103	108.182	136.435	91.7083	93.6667	89.875	97.8095	75.2273	106.909	0.0220053	0.344799	14.784	0.112
Eef1akmt2	119.556	148	65.8889	135.5	96.3	181.286	117.545	147.812	145.857	124.636	101	214	0.0220897	0.345289	14.7739	0.369349
Rnf25	137.619	132.439	97.1	120.395	99.7895	85.3556	114.808	93.375	107	127.28	114.417	79.5789	0.0222611	0.347391	14.7537	0.0737687
Gba	111.176	114.717	121.569	130.83	115.689	127.226	97.4857	124.967	102.167	110.047	101.889	95.8235	0.0223305	0.347897	14.7456	0.0204516
Gm14305	111.833	215.8	146.2	114	165	185.286	137.75	167.5	143.8	158.357	133.429	137	0.0225889	0.349608	14.7155	0.490516
Irf5	95.9875	118.519	111.431	119.669	112.91	111.301	98.7273	110.578	107.413	109.558	114.852	112.147	0.0225812	0.349608	14.7164	0.0154746
Necap1	130.171	149.649	141.324	169.113	128.508	155.839	126.635	130.244	126.87	144.733	148.113	109.581	0.0225855	0.349608	14.7159	0.0464223
Prmt7	171.75	129.941	120.348	86.2353	91.7727	107.348	110.568	128.864	128.067	129.222	117.923	92.5333	0.0225344	0.349608	14.7218	0.133835
Ndufb7	80.2185	84.1534	93.9444	80.9398	93.7094	99.2734	86.8269	85.7799	87.4925	90.3121	100.258	95.5	0.0226961	0.349677	14.7031	0.0170569
Rpl4	98.3245	98.2662	92.7765	93.9332	98.9008	99.877	91.2625	89.8305	87.3375	89.6558	94.1205	89.9758	0.0226704	0.349677	14.7061	0.00401915
Thoc1	119.6	162.333	47	154	135.333	159.824	128.733	178.625	132.381	99.6	135.133	99.2	0.0227048	0.349677	14.7021	0.132451
Btbd2	144.684	129	109.455	86.2963	91.8667	131.5	107.087	137.769	104.55	140.579	96.3913	112.818	0.0235551	0.351648	14.6057	0.0936266
Cdkn2c	88.8462	162.067	86.8	87.7857	189.667	167.182	115.636	86.1316	103.4	133.5	130.778	78.25	0.0232721	0.351648	14.6374	0.212137
Ctnnd1	137.643	124.8	131.24	98.1321	140.684	96.7037	129.48	126.857	126.419	127.026	105.051	108.348	0.0229234	0.351648	14.677	0.0436815
Cxcr4	116.786	108.474	136.175	127.681	112.263	124.649	116.399	117.655	111.624	113.817	121.976	126.924	0.0236411	0.351648	14.5962	0.0122967
Entpd1	112.656	105.797	128.944	129.625	106.106	101.424	105.598	95.3056	100.732	129.299	100.659	105.493	0.0236121	0.351648	14.5994	0.0280758
Eps15	106	122.785	108.333	128.893	102.973	151.224	130.161	125.883	119.098	122.667	139.319	85.2414	0.0230135	0.351648	14.6667	0.0392158
Foxj2	83.9444	139.947	201.222	158.308	134.4	145.906	113.067	138.462	122.286	137.438	126.818	119.727	0.0238792	0.351648	14.5699	0.124529
Gatc	230.111	151.048	104.818	88.1667	124.167	153.667	108.55	154.267	121.25	154.571	98.125	109.5	0.023815	0.351648	14.577	0.184518
Ifi27	113.922	107.244	103.447	90.0508	117.464	98.6667	104.71	94.6806	99.0341	92.1909	112.125	103.182	0.0229776	0.351648	14.6708	0.0260583
Il11ra1	128	122.529	95.62	111.48	100.433	133.179	102.222	123.86	100.258	103.816	112.757	128.294	0.0238105	0.351648	14.5774	0.0615082
Il7r	98.7561	113.293	118.534	101.937	120.783	105.848	100.746	103.396	105.434	110.635	107.765	133.111	0.0235128	0.351648	14.6105	0.0246798
Lamc1	144.333	121.167	126.5	93.5455	118.048	71.3571	116.6	114.75	102.118	120	89	108.462	0.0234242	0.351648	14.6204	0.152295
Mrpl20	137.971	126.158	127.362	107.151	117.207	129.134	120.697	131.442	114.683	135.971	122.317	121.231	0.0236074	0.351648	14.5999	0.0272387
Pdcd7	144.273	109.538	137.333	172.522	67.7692	102.667	93.1818	101.769	101.455	90.3333	148.214	117.75	0.0236542	0.351648	14.5947	0.167755
Ppm1k	176.667	251.5	261.333	182.308	122.071	63.1667	147.167	227	72	172.273	122.75	211	0.0237675	0.351648	14.5822	0.364555
Psme2	84.7742	98.6256	107.638	92.3768	95.779	91.8413	93.017	97.1872	96.4183	99.4296	90.5079	78.9744	0.0230617	0.351648	14.6612	0.00871137
Rbak	239	204.875	108.5	74	208.8	131	107.8	78.3333	131	178.2	110.6	212	0.0233882	0.351648	14.6244	0.541644
Rhob	123.67	115.239	122.578	114.107	107.872	129.126	118.083	105.584	121.463	108.745	125.215	125.632	0.0230238	0.351648	14.6655	0.0110019
Rxylt1	135.12	114.105	71.5455	93.6875	149.385	112.107	109.48	105.167	132.833	123.478	99.6364	180.714	0.0233353	0.351648	14.6303	0.0975355
Scarb2	115.467	107.076	110.696	127.759	123.372	118.165	121.641	102.954	115.214	121.198	112.772	111.105	0.023815	0.351648	14.577	0.0155737
Serpinb6b	129.231	134.809	106.798	111.153	115.449	98.697	99.9643	101.821	105.588	109.8	100.735	79.1579	0.0234011	0.351648	14.6229	0.0298427
Tlk2	120.533	111.579	105.615	131.952	103.083	154.458	94.5263	119	72.6364	104.655	104.056	111.333	0.0233198	0.351648	14.6321	0.126138
Tpp2	127.6	147.254	103.607	148.568	123.811	131.542	110.808	135.9	112.714	119.196	123.923	109.412	0.0238587	0.351648	14.5721	0.0633571
Trim12c	75.625	152.75	122.125	119.59	125	125	113.118	114.412	114.727	147.214	109.391	102.375	0.0235627	0.351648	14.6049	0.08069
Urgcp	78.875	128.067	142.667	129.333	108.276	107.12	74.4	110.125	75.3077	113.294	105.222	99.25	0.0231935	0.351648	14.6463	0.114424
Xrcc4	183.667	95.2308	124.231	90.375	132.6	137.917	98.4444	95.4286	96.5	137.625	110.714		0.0230434	0.351648	14.6633	0.287516
Zc3hav1	127.933	115.899	134.568	150.374	140.23	143.096	113.757	135.534	132.231	139.524	122.295	138.486	0.0235798	0.351648	14.603	0.0232532
Zfp386	99	162.786	114.8	174	142.053	62.6154	91.4615	101.571	106	118	109.3	188.4	0.023824	0.351648	14.576	0.186871
Rplp2	84.7376	85.4663	84.1694	80.8277	85.4682	87.9135	82.9719	84.1779	83.3558	79.0575	84.3018	80.9024	0.0241223	0.354674	14.5433	0.0022997
Arhgap31	120.04	133.246	93.9697	108.774	111.605	121.833	104.714	105.222	103.047	104.87	97.6364	89.8529	0.0242736	0.355461	14.5269	0.057876
Clta	105.812	105.337	110.394	104.252	97.3096	104.744	102.193	101.597	107.762	98.8891	104.371	94.7684	0.0242873	0.355461	14.5254	0.00588788
Gins2	108.074	103.96	151.522	94.3158	137.321	116.533	131.441	145.484	99.7308	101.391	88.6429	106.5	0.0243239	0.355461	14.5214	0.100148
H2-K2	266.333	264.933	137	181	228.25	191.368	193.4	214.7	174.857	158.294	117.75	178.75	0.0243647	0.355461	14.517	0.18376
Slc40a1	118.378	141.257	142.281	140.145	124.162	136.351	123.05	129.986	123.522	137.769	125.441	114.569	0.0243402	0.355461	14.5197	0.00930749
Eif3g	82.64	110.419	93.625	91.8448	83.1216	87.5696	97.725	86.4512	98.5821	94.2025	92.0758	89.8286	0.0244342	0.355922	14.5096	0.0304823
Gm15500	106.797	106.805	92.6689	91.1594	106.991	102.407	94.441	90.805	91.8553	103.172	100.128	98.3289	0.0245193	0.35606	14.5004	0.0161295
Siah2	137	117.562	105.667	130.222	121.929	58.6667	104.091	90.3636	68.625	137.571	142.25	88.8333	0.0244981	0.35606	14.5027	0.181284
Hmga1b	96.7711	101.524	103.387	90.1587	115.638	112.321	106.56	104.699	96.5192	97.1319	112.043	102.989	0.0246258	0.356807	14.489	0.0172079
Prxl2a	82.7692	103	152.923	110.909	124.75	109.875	137.19	102.409	105.455	89.1	108.143	131.143	0.0246466	0.356807	14.4868	0.155772
Hnrnpa0	106.435	95.6268	111.527	127.843	97.17	102.297	88.1462	97.35	111.378	109.321	106.7	112.448	0.0247749	0.358113	14.4732	0.0227565
Rcc2	108.51	128.105	108.288	131.872	119.903	105.408	129.471	124.814	120.554	117.459	116.31	118.44	0.0248174	0.358178	14.4687	0.0411041
Ell	170.895	93.8696	123.929	162.071	143.9	172.45	120.074	112.263	172.429	140.833	109.143	96.5714	0.0249481	0.358963	14.4548	0.112928
Samd4	32	102	32	197.143	93.4286	252.8	157	135	129.667	137	175.286	175.5	0.0249249	0.358963	14.4573	0.578291
Tmem254a	91.8621	102.513	95	101.943	129.909	122.75	114.146	111.956	112.632	110.108	92.8485	99.9048	0.0251334	0.361077	14.4354	0.0650242
Bcl2l13	105.667	102.211	85.7	128.667	127.857	81.3913	109.25	122.12	98.5652	110	116.571	108.833	0.0252999	0.361396	14.418	0.129892
Lamtor3	167.205	165.093	144.507	138.048	131.853	152.363	122.598	125.357	119.377	125.734	132.961	117.122	0.0252657	0.361396	14.4216	0.0256611
Pccb	100.286	116.939	137.941	133.72	147.947	148.429	114.848	107.8	114.5	92	125.909	146.7	0.0253092	0.361396	14.417	0.118172
Slc35f6	113.969	128.071	125.745	104.649	115.571	118.391	109.849	111.744	111.477	122.589	114.814	103.177	0.0252831	0.361396	14.4198	0.018416
Eid1	104.655	102.579	115.488	101.237	130.758	113.882	106.856	102.888	108.667	108.969	119.121	112.093	0.0253689	0.361699	14.4108	0.0215409
Lpxn	136.022	130.114	150.678	130.82	130.243	123.703	133.083	129.173	134.652	126.04	121.195	119.414	0.0254333	0.362068	14.4042	0.0111058
Dnaaf5	169	147	107.667	151.444	67.7273	79.625	120.333	109.4	107.455	95.3077	83.3333	105.25	0.0256369	0.364415	14.3832	0.252336
Hnrnpd	92.1	125.459	105.244	124.254	116.873	127.178	102.879	108.247	116.527	104.761	109.93	114.412	0.0258559	0.366474	14.3608	0.0312871
Ubfd1	119.316	149.171	101.931	121.583	96	116.69	139.767	130.182	147.545	115.839	113.226	103.05	0.0258596	0.366474	14.3604	0.083008
Gm49322	71.6667	108.962	85.1579	106.714	106	110.529	103.138	109.571	125.278	119.13	130.75	110.875	0.0259482	0.366721	14.3514	0.107905
Lnpk	109.438	136.476	102.583	162	81.5385	116.733	140.818	136	112.25	144.091	136.167	63	0.025955	0.366721	14.3507	0.170841
Fmnl1	125.188	148.578	126.488	89.825	108.833	126.892	121.821	114.55	129.711	116.391	118.762	109	0.0260362	0.367317	14.3424	0.0583026
Mrpl52	96.3151	106.488	98.7356	92.1053	87.93	88.7742	88.4298	89.2636	88.6847	90.747	104.125	95.4898	0.0261209	0.36796	14.3339	0.0252357
Dusp4	99.2174	89.8333	100.457	44	71	118.6	108.045	111.943	85.6364	134.286	188.571	65.5	0.0262904	0.369088	14.3168	0.29218
Plec	105.736	115.801	109.34	133.283	112.6	106.361	107.206	108.507	112.451	100.642	115.921	111.964	0.0263267	0.369088	14.3132	0.018004
Ptms	105.798	107.887	111.215	118.227	112.03	114.878	107.104	106.92	111.973	113.086	108.152	105.205	0.026397	0.369088	14.3062	0.00360902
Tbc1d1	78.7	127.406	112.333	108.182	140.765	142.091	111.375	124.212	122.808	128.414	123.944	84.375	0.0263903	0.369088	14.3068	0.104429
Vps13d	104.438	133.469	193.5	181.375	138.241	148	93.381	128.562	154.5	148.105	150.923	110.667	0.0262923	0.369088	14.3166	0.113624
Tma16	70.9286	155.167	128.333	119.583	116.941	104.6	142.318	133.088	108.4	114.733	157.632	82	0.0264539	0.369334	14.3005	0.127683
Orc5	151	87.7143	128.375	168.562	148.857	135.8	136.357	173.083	138.727	98.3571	122.75	135.375	0.0266066	0.370366	14.2853	0.204076
Pik3r4	156.471	82.3529	145	159.773	91.4167	104.81	110.9	129.1	78.1667	106.933	112	88.2	0.0265962	0.370366	14.2863	0.147282
Fam76b	160.667	203.241	162.833	271	159.294	157.263	194.636	163.652	179.609	160.273	130.467	128.143	0.026673	0.370743	14.2787	0.124163
Gpd2	45.1429	154.4	73.7143	133.667	158.333	143.583	103	124	123.556	136.455	111.25	101.714	0.0269542	0.37245	14.251	0.206537
Lbr	106.083	136.783	138.727	166.038	144.789	93.1818	135.842	116.217	141.25	124.818	139.4	82.8	0.026889	0.37245	14.2574	0.125065
Map2k1	117.048	128.187	112.902	109.443	103.398	120.85	109.827	115.648	136.198	109.01	108.962	97.449	0.0269178	0.37245	14.2546	0.0268448
Zfp979	124.429	115.818	93.4	178.933	118.409	112.824	149.476	141.286	109.885	112.227	92.2105	118.455	0.0268606	0.37245	14.2602	0.151705
Ccnd1	111.755	110.462	111.337	104.25	95.3553	128.042	100.853	98.0879	94.764	99.7763	73.6375	100.933	0.027175	0.373594	14.2295	0.0106508
Osbp2	112.375	138.929	110.8	198.909	193.2	90.3333	143.8	60.8571	220	138.5	95.6667	122	0.0271845	0.373594	14.2286	0.249624
Ubac2	104.533	89.8684	132.241	121.774	126.868	90.963	106.774	91.3529	130.739	91.4	96.9259	110.3	0.0271957	0.373594	14.2275	0.0794832
Zfp91	111.613	110.382	108.222	152.779	103.897	112.232	88.7717	104.202	112.209	96.6818	109.076	89.2222	0.0271687	0.373594	14.2301	0.0324888
Fam89b	103.646	101.117	112.438	119.866	114.171	99.1944	104.442	100.263	106.706	110.268	111.973	110.183	0.0272619	0.373957	14.2211	0.0200862
Aamp	106.594	115.978	128.405	123.222	111.22	101.806	103.722	110.761	117.381	124.445	112.207	99.7576	0.0275927	0.376983	14.1892	0.0190715
Gclc	139.345	152	111.54	111.579	110.385	140.273	153.143	152.375	129.708	175	171.071	122.7	0.0276027	0.376983	14.1882	0.0497833
Pdia4	93.3226	99.3864	121.703	111.179	129.476	102.75	112.974	100.121	126.308	107.75	114.194	118.5	0.0275379	0.376983	14.1945	0.0460859
Dnmt3a	142	132.584	144.976	120.052	118.759	111.619	134.479	132.033	124.159	141.169	119.042	113.255	0.0277036	0.377812	14.1786	0.0195567
Il4ra	86.1139	91.1512	95.5526	104.758	102.633	119.2	102.075	90.9531	116.95	96.8261	116.43	94.0233	0.0278928	0.379842	14.1606	0.0316085
Ints8	160.4	114.72	144.5	89	106.5	79.5	108.25	149.857	125.526	115.5	143.625	144	0.0282601	0.383182	14.126	0.164256
Rabac1	95.6968	93.1959	100.237	103.813	107.205	101.715	94.8945	101.428	100.228	94.5789	106.32	102.23	0.0282546	0.383182	14.1265	0.00956432
Znfx1	133.275	126.806	127.534	115.5	105.037	123.904	105.344	126.108	118.53	113.641	100.902	107.135	0.0282517	0.383182	14.1268	0.0124028
H3c14	187.4	54	191.25	89.6667	159.667	148.2	128.333	233	106.833	149.143	113.2	25	0.0283277	0.383545	14.1197	0.564786
Emilin1	134.087	127.775	107.636	100.543	119.167	74.4615	114.108	125.111	105.696	80.7333	116.914	115.682	0.0284708	0.384181	14.1063	0.0746366
Mib1	128.044	142.733	173.562	135.543	155.415	149.269	140.723	135.982	108	121.929	131.562	144.31	0.0285136	0.384181	14.1023	0.0462372
Ric8a	141.769	129.207	113.759	116.377	129.984	92.8108	113.044	111.229	125.895	142.109	85.2683	99.35	0.0285561	0.384181	14.0984	0.0498177
Rnf135	133.846	144.038	108.8	154.29	126.61	91.2778	154.15	130.786	143.2	138.967	125.188	105.214	0.0285788	0.384181	14.0963	0.0886559
Sucla2	146.297	130.589	101.455	129.308	115.5	99.1053	122.803	106.5	123.85	114.105	91.1842	105.095	0.0284764	0.384181	14.1058	0.0500206
Acss1	96.6667	183.143	81.8571	140.368	111.737	96.5455	110.667	87.5	101.143	116.417	128.182	80.6667	0.0287188	0.385459	14.0834	0.154762
Actr1b	123.787	134.798	121.108	130.193	155.22	147.956	111.036	144.272	114.589	145.852	125.75	118.556	0.0287558	0.385459	14.0799	0.0379513
Ccng1	96.5376	103.148	104.852	96.3696	106.89	107.471	98.3558	98.7339	106.903	107.69	107.861	112.381	0.0288169	0.385728	14.0743	0.0120191
Fkbp8	103.134	110.628	104.93	126.486	103.943	111.775	111.657	109.42	103.917	110.76	111.506	104.32	0.0289694	0.387218	14.0603	0.0122691
Leprotl1	116.222	105.388	95.1346	103.985	99.265	98.5963	98.1736	101.19	99.8495	110.069	98.1354	103.564	0.0291493	0.388764	14.0439	0.0191595
Nploc4	92.5263	121.833	112.365	116.491	92	118	114.078	104.62	117.532	124.459	123.432	108.92	0.0291676	0.388764	14.0423	0.0409395
Pgghg	87.5	62.5	215.75	145.8	124.818	122.6	87.5	102.2	108.714	111.1	181.625	103	0.0292391	0.389166	14.0358	0.359892
Cd68	111.121	111.13	116.076	115.147	111.26	112.415	106.528	110.225	108.327	112.665	109.559	106.811	0.0293101	0.389559	14.0293	0.0011633
Ndufc2	109.652	111.494	110.816	112.26	99.8169	94.9493	100.331	110.132	115.092	102.318	111.227	99.3731	0.0295296	0.391371	14.0096	0.0176888
Ppp1ccb	124.524	131.645	75.3571	107.318	121.526	107.256	106.037	128.081	104.571	124.952	98.5455	99.6667	0.0295	0.391371	14.0122	0.0749317
Hcls1	135.385	127.283	110.236	123.881	117.253	121.027	121.131	139.487	102.805	114.524	109.845	113.278	0.0296214	0.392036	14.0013	0.012336
Ufd1	114.32	150.352	113.917	159.829	149.677	141.414	137.82	139.159	132.436	148.429	134.25	102.5	0.0298474	0.393366	13.9812	0.0672171
Usp3	137.769	112.2	106.4	116.059	103.706	124.029	94.963	116.294	126.412	146.12	108.72	125	0.029823	0.393366	13.9833	0.0827416
Zfp236	119.25	278.222	185.5	139	181.533	159.833	151.769	218.714	173.667	133.714	164.444	128	0.0298094	0.393366	13.9845	0.221977
Dnajb11	95.119	122.319	121.159	112.345	103.459	108.954	97.2727	102.968	113.543	94.5528	99	110.676	0.0300879	0.394327	13.9599	0.021915
Haus4	177.556	86.5714	162.733	207.8	84.6	144.667	134.55	135.562	84.8571	166.778	121.5	162.667	0.030082	0.394327	13.9604	0.244919
Shb	106.667	29.2	97.5714	105.333	150.167	183	84.2	63.5	89.5	118.889	102	7	0.0300429	0.394327	13.9638	0.398966
Uqcr10	121.655	116.15	111.513	107.729	113.095	103.868	107.945	107.585	109.606	112.447	102.957	114.385	0.0299767	0.394327	13.9697	0.0127113
Gna11	96.8	219.083	194.7	205.667	174.333	118.571	151	82.8	127.375	193	166.25	85.8	0.0302104	0.395383	13.9491	0.24472
Repin1	129.545	97.8125	93.8571	165.636	170.722	115.143	90.8571	143	117.6	119	89.75	189.6	0.0303202	0.396269	13.9394	0.160223
2310022B05Rik	91.4545	133.625	67.4444	133.333	74.1667	157.733	109.2	107.364	112	97.1333	105.909	73	0.0304967	0.398022	13.924	0.158227
Ap2m1	110.886	108.983	114.778	119.368	120.518	119	109.141	109.105	111.733	115.127	111.446	107.406	0.0305505	0.398171	13.9193	0.00505789
Abi1	134.722	138.529	121.848	107.824	120.836	112.577	122.709	121.55	114.472	122.371	125.504	125.338	0.0307938	0.398583	13.8982	0.0164282
Cap1	126.113	127.014	125.977	115.512	120.639	119.176	121.138	116.016	124.286	119.764	119.589	114.871	0.0307589	0.398583	13.9013	0.00649591
Rab9	134.4	118.774	127.025	110.577	90.5345	128.377	98.9524	118.156	107.854	118.314	95.5625	123.116	0.030735	0.398583	13.9033	0.043178
Rdh14	104.941	114	135.929	161.6	96.0435	119.579	139.95	136.917	150.5	82.0667	106.909	130	0.0307742	0.398583	13.8999	0.119827
S100a11	100.632	119.683	108.27	116.679	118.484	115.383	112.545	109.781	115.65	114.315	106.993	114.213	0.0306812	0.398583	13.908	0.0100782
Ahcyl1	149.078	163.297	146.351	124.612	110.054	126.543	102.031	111.276	122.212	113.156	107.316	106.412	0.0308697	0.399017	13.8917	0.036946
Basp1	94.6818	103.912	93.2165	90.1568	98.4414	97.7296	99.6013	107.968	98.1447	91.1473	103.459	92.8788	0.0310931	0.399296	13.8725	0.00832684
Itgav	164.47	153.251	154.542	140.833	146.294	138.315	155.23	151.748	128.317	136.164	121.639	127.826	0.0310075	0.399296	13.8798	0.0229419
Kat14	141.417	124.316	127.455	78.4545	87.55	119.304	89.6129	100.731	126.536	126.938	110.667	47.6	0.0311035	0.399296	13.8716	0.117556
Mterf4	181.667	155.643	298.6	159.5	103.5	81.6667	162.444	101.2	114.667	141.1	147.5	128.8	0.0310864	0.399296	13.8731	0.289023
Tubb5	106.178	109.401	110.989	95.9627	103.777	102.068	98.9209	100.289	101.919	94.2262	96.3512	100.326	0.0310733	0.399296	13.8742	0.00688546
Gm42860	170.667	161.4	140.286	296	317.25	148	167.111	232.875	210.333	203.6	214.75	269.143	0.0312322	0.399536	13.8606	0.433145
Pnrc2	101.076	111.686	133.875	131.48	116.323	119.911	125.92	113.76	132.796	118.261	119.615	113.583	0.0312602	0.399536	13.8583	0.0284564
Polg	201.636	203.333	108.833	131.889	182.045	204.375	157.72	171.636	156.714	143.118	118.667	86.3333	0.0312495	0.399536	13.8592	0.134555
Smug1	187.2	104.143	191.286	253.667	121.625	72.3333	131	193.222	143	55.8333	171.25	176	0.031292	0.399536	13.8556	0.374474
Mga	171.364	194.5	205.286	118.733	146.227	159.75	151.952	140	163.462	133.053	150.75	162.571	0.0314359	0.40083	13.8433	0.179784
Zfp207	166.767	157.698	132.538	147.396	170.205	135.237	133.853	128.867	128.849	98.6792	128.238	116.853	0.0316748	0.403329	13.8232	0.0303806
Rexo1	125.727	178.636	183.188	157.364	121.87	119.071	179.6	189.429	123.6	171.812	158.4	92.5	0.031779	0.404109	13.8144	0.1439
Id2	109.615	117.72	123.122	123.319	119.286	118.538	112.461	116.748	117.525	119.711	124.683	118.32	0.0319022	0.405127	13.8041	0.00474859
Anpep	116.169	114.717	127.363	113.685	110.252	114.237	106.41	115.415	128.625	115.352	114.843	113.868	0.031955	0.405252	13.7997	0.00359368
Mpp1	112.746	116.568	122.954	113.081	106.494	112.638	106.661	109.338	111.238	115.356	105.645	101.852	0.0323268	0.409415	13.7689	0.00710104
Vrk1	114.2	113.333	103.364	179	141.667	77.5455	93.1	99.2222	117.929	144.25	151.895	134.75	0.0324542	0.410475	13.7584	0.208461
Adprh	105.774	124.911	97.6667	112.584	111.736	105.549	98.9683	113.696	113.52	105.13	100.568	110.978	0.0326011	0.41178	13.7464	0.032193
Lars2	40.4358	33.148	24.887	41.5958	30.3844	39.2207	37.1507	28.9541	26.3277	21.8105	24.1333	39.6055	0.0327136	0.412647	13.7372	0.147712
Ppie	93.8333	124.318	106.375	102.04	146.923	145.882	105.688	120.923	132	145.857	108.2	114.091	0.0329801	0.415452	13.7156	0.139955
1110059E24Rik	159.667	118.115	72.6	89.7222	127.353	100.364	141	97.25	137.7	119.846	128.538	113.833	0.0332861	0.416936	13.6909	0.141143
Elob	88.588	100.099	96.6792	90.7199	93.5495	95.35	91.1037	95.0969	89.8828	96.0785	93.8525	96.6702	0.0333772	0.416936	13.6836	0.00670765
Hsd17b7	132.833	148.909	77	123.25	105.8	151.5	127.8	117.231	108.25	119.5	109.75	228.5	0.033408	0.416936	13.6811	0.248748
Mrps9	141.8	109.667	131.526	164.65	101.304	118.043	131.2	146	162.25	96.6875	132.682	141.091	0.0331985	0.416936	13.6979	0.118086
Msl1	125.652	104.783	124.732	159.971	129.822	140.018	100.378	98.5385	106.212	121.567	116.036	93.1111	0.033167	0.416936	13.7005	0.0559203
Slf2	143.368	144.238	83.9524	128.353	116.529	117.435	99.4444	88.75	152	146.889	134.368	98.125	0.0333713	0.416936	13.6841	0.228068
Wnk1	149.783	122.259	123.852	121.974	111.336	123.176	121.818	115.679	112.5	129.539	116.798	121.452	0.03336	0.416936	13.685	0.0180541
Pmaip1	86.3077	141.806	89.6667	133.625	104.033	114.565	128.333	106.808	131.846	101.118	131.444	82.2	0.0335153	0.417168	13.6726	0.0997999
Zfp385a	92.8095	111.071	125.308	141.549	101.312	94.449	118.256	121.229	111.158	111.737	108.229	103.273	0.0334788	0.417168	13.6755	0.0540533
Plau	117.84	130.655	141.012	139.125	155.136	156.889	135.88	138.117	143.59	138.912	160.083	126.889	0.0335893	0.417537	13.6667	0.0215223
Anapc13	125.188	112.088	114.75	110.923	96.0645	121.741	91	102.622	86	104.147	103.679	86.2273	0.0339194	0.418197	13.6406	0.08168
Kif16b	148	106.714	95.4286	84.4091	99.75	85.6364	114.409	111.609	127.6	122.091	95.4375	101.125	0.033954	0.418197	13.6378	0.140596
Ldha	107.573	107.857	99.1278	101.287	102.364	103.058	99.4836	99.2756	101.401	100.771	99.6932	98.9957	0.0339979	0.418197	13.6344	0.00405303
Pik3r1	94.25	133.469	128.08	103.855	103.786	102.788	110.239	107.69	107	113.182	101.233	89.84	0.0338356	0.418197	13.6472	0.0513052
Tor1aip2	117.268	133.426	122.904	129.365	120.397	113.842	127.1	128.22	131.109	112.583	132.987	126.118	0.033962	0.418197	13.6372	0.0141465
U2af1	121.745	120.16	111.269	93.2203	103.961	87.2	99.2817	107.167	102.804	105.852	84.9048	80.64	0.0337259	0.418197	13.6558	0.0371083
Uvssa	174.25	162.25	217.667	72.8	267.286	152.556	209	136.333	279	175.625	166.429	209.25	0.0339931	0.418197	13.6348	0.426086
Xaf1	165.083	143.591	116.642	120.005	118.199	107.27	86.65	98.4286	147.904	120.215	111.66	118.375	0.0338826	0.418197	13.6435	0.0176045
Mrtfa	141.2	111.111	133.436	112.938	111.311	101.621	119.255	117.564	108.6	100.854	106.759	103.062	0.0340776	0.418629	13.6281	0.0386066
Cav2	110.5	109.263	93.1014	124.018	105.171	89.3971	103.748	110.896	112.875	97.7925	117.03	111	0.0341775	0.41931	13.6203	0.0301334
Eya1	76.0714	137.5	157.846	145.333	101	117.375	125.923	109.971	89.1053	151.633	141.368	107.706	0.0343546	0.420933	13.6065	0.110622
C030006K11Rik	146.222	88	145.3	149	60.4	139.714	147	96.3333	120.75	87.625	149	96.2857	0.0344603	0.42168	13.5983	0.323768
Irgm1	117.302	102.585	116.031	105.045	105.343	98.6522	103.873	114.02	117.924	101.327	100.456	97.0593	0.0346361	0.42328	13.5847	0.010307
Zbtb2	110.4	105.8	81.375	61.2	68.6	128.909	109.125	93.5	132.8	112	130.25	87	0.0347305	0.423883	13.5774	0.238199
Ktn1	114.917	156.591	146.833	162.615	126.077	89.1111	137.636	127.938	156.833	136.955	161.333	155.8	0.0348142	0.424354	13.5709	0.171784
Prkch	115.515	127.344	118.226	90.3913	126.577	139.037	123.6	106.256	100.63	105.743	107.531	151.19	0.0349375	0.424757	13.5615	0.0584546
Stard3nl	92.7907	120.694	119.417	139.164	113.158	142.321	116.267	111.808	115.07	129.581	105.167	98.5238	0.0349202	0.424757	13.5628	0.0391988
Gamt	84.9333	99.5769	113.556	82.7907	118.458	121.786	97.775	74.5417	107.579	91.9048	82.76	101.667	0.0351249	0.426146	13.5471	0.0868407
Htatsf1	127.6	147.375	57.5	64.5	110.875	94.8235	96.9375	52.3889	89.2308	106.6	120.455	127.429	0.0352149	0.426146	13.5403	0.18806
Impa2	161.75	72.8333	161.7	107.917	92.5	109.778	134.412	107.286	115.15	115.562	71.1667	225	0.0352782	0.426146	13.5355	0.265402
Larp4b	109.978	135.089	133.326	122.589	89.449	124.103	99.7069	114.273	125.95	114.13	133.424	111.167	0.0352479	0.426146	13.5378	0.0397002
Rnf157	85.5455	113.357	157.769	86.4	147.571	97.375	95.1111	100.6	109.083	105.1	84.75	77	0.0352609	0.426146	13.5368	0.233393
Fabp4	114.714	140.202	107.523	114.48	114.364	114.287	112.5	124.203	114.539	116.737	90.06	110.452	0.0353657	0.426655	13.5288	0.0168899
Atrip	97.6522	122.84	115.694	93.5767	100.642	97.4831	124	109	108.535	98.2679	103.504	88.7302	0.0355342	0.426752	13.5161	0.0192812
Atxn1	136.625	133.312	98.3333	163	108.5	89.5263	139.321	134.538	150.125	158.947	120.471	100.833	0.0355886	0.426752	13.512	0.142232
Cops2	127.28	112.463	119.16	101.535	91.3293	114.175	104.101	96.1746	106.451	97.459	101.283	79.0323	0.0356028	0.426752	13.5109	0.0337773
Cox7b	110.331	106.746	112.201	100.527	105.505	111.344	103.905	103.751	101.648	108.025	96.259	108.509	0.0357365	0.426752	13.5009	0.0089946
Hnrnpa3	111.753	122.857	104.333	102.772	108.929	108.56	102.435	98.8913	110.271	108.855	99.9086	104.509	0.0355204	0.426752	13.5172	0.00835423
Plekhg2	62.6667	129.222	407	172.4	214.333	82.7273	112.5	196	98.3333	69	85.6667	96	0.0356888	0.426752	13.5045	0.422015
Vps37c	121.294	126.78	163.793	142.531	102.176	103.679	109.133	112.371	114.316	128.613	133.054	90.7222	0.035616	0.426752	13.5099	0.071105
Zfyve27	132.529	148.32	158.737	214.435	162.474	132.696	150.933	118.941	131.909	136.844	155.824	147.167	0.0357339	0.426752	13.5011	0.10466
Atox1	120.372	118.845	118.144	112.904	121.174	120.764	119.542	119.408	116.005	112.259	114.339	119.872	0.0360661	0.427972	13.4763	0.00491297
Hax1	99.377	127.19	109.051	114.719	108.545	108.205	114.532	116.793	98.3804	96.0745	115.807	89.1463	0.0359791	0.427972	13.4828	0.0221756
Ints10	143	185.375	241.231	165.4	110.533	122.524	107.375	145.889	128.333	130	167.125	194.333	0.0360399	0.427972	13.4782	0.184633
Mtmr12	87.25	101	85.4286	128.857	177.6	151.923	119.273	101.929	132.333	94.2778	129	119.857	0.0359345	0.427972	13.4861	0.179814
Rps13-ps1	71.0148	72.3185	70.8667	70.6195	76.665	76.3352	67.0825	66.3879	62.7007	62.6109	76.1117	63.8152	0.0359119	0.427972	13.4878	0.010126
Cyria	97.5714	167.25	119.607	141.105	114.062	126.708	111.714	125.214	124	121.639	131.86	87.5385	0.0362433	0.429327	13.4631	0.0545066
Limd1	79.6522	137.795	123.158	119.342	141.069	119.657	120.073	111.969	104.222	126.552	131.038	82.5714	0.0362715	0.429327	13.461	0.0697463
Hjurp	144.786	191.688	116.556	150.25	98.7143	34.6667	128.333	162.857	141.077	172.9	167.308	107	0.0364323	0.42962	13.4492	0.220478
Pibf1	83.3333	141	164.5	236.333	117.6	206.5	114.667	79.5	97.3333	92	144.333	149.6	0.0364333	0.42962	13.4491	0.38426
Tubb2a	95.875	93.944	111.372	109.723	109.453	97.8702	91.9202	98.1005	94.4235	96.6728	113.358	107.965	0.0363613	0.42962	13.4544	0.0134679
Mast3	155.962	179.536	150.08	188.867	154.389	126.5	153.394	131	169.64	151.846	136.269	168.588	0.0366274	0.431369	13.4348	0.0799693
Smpdl3b	64.5	184	96	200.429	106	101		61	57	67.1667	170	27	0.0366797	0.431445	13.431	0.583957
Arid4b	152	166.867	133.286	102.75	164	134.368	155.067	118.286	128.5	207.444	146.167	277.571	0.0369047	0.433164	13.4146	0.169805
Calm1	88.9969	93.6068	95.4627	88.1661	94.7098	94.7667	91.3168	89.4506	89.6898	87.3718	89.4228	89.6066	0.0369807	0.433164	13.4091	0.0028373
Pdcd5	106.238	103.973	107.224	79	97.5493	84.3651	92.4638	92.129	88.3906	87.537	83.3158	79	0.0369778	0.433164	13.4093	0.0367378
Slc4a2	143.774	116.805	110.273	157.462	166.308	136.278	121.476	146.286	142.409	134.257	177.048	117.579	0.03701	0.433164	13.4069	0.0650823
Dedd	137.1	119.906	109.909	127.643	112.138	147.52	120	132.214	115.4	102.2	114.238	132.833	0.0373034	0.43553	13.3857	0.0910594
Trrap	199.615	173.767	209	178.542	249.889	178.25	141.913	151.7	160.364	154.45	157.429	234.818	0.0373047	0.43553	13.3856	0.103765
Dnajc10	146.8	109.935	145.161	111.412	125.356	146.108	133.246	130.357	115.378	133.842	105.5	109.773	0.0373663	0.435709	13.3812	0.0524753
Tex261	108.806	125.802	108.929	136.693	115.87	119.068	118.929	105.922	112.479	123.65	111.051	114.605	0.0375457	0.437259	13.3683	0.0272267
Birc3	104.846	166.667	110.615	126.618	104.731	142.129	145.222	128.357	109	141.438	77.2778	108.846	0.0377471	0.439061	13.354	0.0902294
Tmem184c	97.3333	119.842	141.286	168.118	172	211.889	116.87	135.722	143.562	164.429	132.8	129.125	0.0377952	0.439078	13.3505	0.16085
Fryl	69.7	136.095	130.778	149.714	87.4615	174.857	123.182	105.571	117.96	124.4	114.118	97.8889	0.0379534	0.440372	13.3393	0.162674
Fbrs	109	130.524	115.735	138.711	130.511	100.775	113.875	128.308	109.807	132.325	124.321	139.08	0.0380418	0.440853	13.333	0.0323617
Abca2	170	170.571	157.467	107.5	191.333	143.2	106.125	140.042	120.125	117.786	123.8	204.8	0.0382813	0.440914	13.3162	0.141661
Antkmt	132	101.741	128.042	109.232	122.911	124.725	99.7326	98.0714	100.768	109.605	114.209	93.9767	0.0382581	0.440914	13.3178	0.0274593
Clock	81	108.2	65.25	130.905	157.227	138.462	107.095	123.357	117.4	156.5	159.5	93.5	0.0381251	0.440914	13.3272	0.148079
Gfer	102.87	132.933	89.0588	122.818	89.3913	119.917	109.63	112.429	114.357	100.1	95.8966	116.474	0.0382388	0.440914	13.3191	0.0937968
Mrto4	133.655	119.024	115.784	98.9333	79.25	113.269	134.591	116.512	100.435	100.261	104.467	103.267	0.0382033	0.440914	13.3216	0.0774514
Cxcl16	105.361	122.958	124.248	111.211	108.008	107.575	98.2533	136.612	101.66	109.086	112.697	108.451	0.0384138	0.4419	13.3069	0.0122418
Rap1b	114.708	117.01	119.458	112.983	118.358	105.919	109.484	113.437	113.059	112.125	110.667	117.41	0.0385192	0.442571	13.2995	0.00548885
Zfp747	157.429	83.5	54.6667	170.636	95.1429	99.1111	107	94	91.6667	71.5	95.6	166	0.038586	0.442798	13.2948	0.309182
Rpl22	90.4853	93.4705	85.0524	89.9539	94.8598	86.2603	91.2921	91.932	84.0406	85.369	88.8944	89.9325	0.0389309	0.446211	13.2709	0.00456671
Oard1	155.222	119.304	185.909	131.353	114.474	137.533	158.125	112.36	156.562	127.808	142.13	113.231	0.0389991	0.44645	13.2661	0.128797
Ninj1	90.7673	101.48	94.1192	104.647	98.9561	105.513	93.3701	105.248	89.8945	104.542	96.8286	92.2347	0.0390723	0.446744	13.2611	0.00717979
Osgin1	141.318	160.022	155.733	173.85	129.148	123.849	145.705	133.553	123.905	148.87	134.885	116.583	0.0391363	0.446933	13.2567	0.0521916
Hmmr	180	119.857	47	105	220	85	86.9167	87.5714	102.4	69.5	223		0.0393707	0.448069	13.2406	0.389429
Psmd14	105.73	114.33	106.382	110.806	92.5	99.6582	117.162	110.506	102.535	97.7722	107.436	119.561	0.0394393	0.448069	13.2359	0.0296105
Rspry1	91	140.5	70.5556	104.026	111.3	87.5	73.4118	102.091	90.1579	125	114.889	68	0.0394184	0.448069	13.2373	0.12488
Sdc4	109.083	122.905	123.606	128.83	122.703	117.71	100.586	117.602	115.747	122.336	115.064	119.467	0.0392915	0.448069	13.246	0.0135578
Trem2	121.309	120.031	123.099	123.498	122.139	121.249	113.984	116.04	114.784	116.58	111.365	111.583	0.0394739	0.448069	13.2335	0.00134624
Ankrd13a	116.837	100.705	111.605	121.405	120.057	110.451	105.623	104.08	103.774	106.985	103.908	113.667	0.0397126	0.449334	13.2173	0.0196685
Chka	216	146.7	194.5	249.667	111.8	153.667	191.857	142	228.167	143.636	141.071	70	0.0397015	0.449334	13.218	0.240328
Eef1g	111.382	105.658	105.56	111.328	116.738	111.015	106.89	108.604	105.642	102.261	105.671	103.942	0.0398165	0.449334	13.2102	0.00700436
Gm42047	173.5	259	279	237.812	191.947	102.1	189.286	193.5	199.583	217.526	227.947	169.125	0.039824	0.449334	13.2097	0.244624
Rpl7a	85.381	88.9741	82.1054	85.5096	88.4496	86.739	81.482	84.808	81.2708	82.5396	81.0998	81.3322	0.0397986	0.449334	13.2114	0.00330782
Upf3a	111.65	115.577	38.6	98.5294	81.3333	85	97.1875	83.6923	114.6	93.2	102.25	125.091	0.0398802	0.449428	13.2059	0.136143
Gm48161	139.828	141.615	162	197.111	202.613	215.452	154.7	117.857	152	152	285.2	268	0.0400995	0.45136	13.1911	0.0720826
Hadh	124.548	94.4681	126.413	100.103	99.878	130.905	96.7674	102.554	109.13	118.538	102.809	103.222	0.0403018	0.453095	13.1775	0.0468951
Cers6	137.444	154.122	150.85	130.531	132.191	148.939	152.269	134.7	143.489	123	115.657	118.278	0.040476	0.453427	13.1659	0.0465226
Cox4i1	108.249	107.832	108.558	102.063	108.128	108.168	104.895	109.087	103.571	100.641	102.364	101.716	0.0404187	0.453427	13.1697	0.0032558
Pigf	80	178.083	174.625	135.429	113.3	85.6	124	141.625	141.75	136.167	121	160	0.0404453	0.453427	13.1679	0.263359
Ucp2	107.432	106.984	112.278	108.316	108.323	114.062	113.387	106.245	107.71	110.958	111.908	110.344	0.0407075	0.455479	13.1505	0.00354079
C77080	103.149	111	94.6354	97.1567	115.512	109.419	95.7143	94.4396	121.541	98.0282	110.38	102.568	0.0407837	0.455672	13.1454	0.0174112
Tgfb1	106.849	110.115	100.184	108.384	108.577	108.626	102.201	106.833	103.581	99.663	107.423	98.8683	0.0408216	0.455672	13.1429	0.00580518
Zfp513	65.6364	163	238.625	156.15	159.583	161.774	112.75	155.125	120.667	139.714	196	149.167	0.0409107	0.456125	13.137	0.105944
Cept1	141.818	122.453	136.635	134.948	126.292	127.305	151.524	136.877	146.197	144.826	128.072	119.845	0.0409657	0.456198	13.1334	0.0235788
Cndp2	109.333	120.978	108.062	113.06	115.785	118.537	104.062	116.778	113.121	107.188	110.272	113.032	0.0410602	0.456508	13.1272	0.00470846
Vegfb	95.2564	89.8852	100.229	95.5	112.111	123.579	97.5778	108.786	106.561	90.6667	111.971	119.913	0.0410905	0.456508	13.1252	0.0477279
Dstyk	93.7692	122.333	135.167	100.75	134.143	177.409	150	137.524	125.467	154.625	126.882	135.667	0.0412883	0.456883	13.1122	0.127303
Fggy	70.6667	103.286	139.059	107.958	126.355	98.8947	104.622	94.1	98.5263	112.148	110.065	119	0.0412951	0.456883	13.1118	0.10086
Nprl2	62.5	171.5	124.231	164.462	152.2	142.778	110.182	147.167	161.429	95.4167	84.2857	161	0.0413237	0.456883	13.1099	0.222202
Tango2	164	190.885	112.6	108.083	181.435	127.423	137.3	141.95	125.273	125.75	132	145	0.0412892	0.456883	13.1121	0.103245
Trnt1	141.667	150.957	104.455	139.19	112.92	145.806	102.59	120.562	118.964	91.68	129.474	142.636	0.0413671	0.456883	13.1071	0.0757633
Sema6b	164	97.6667	133.6	122.25	54.3333	60.1667	135.111	114.1	149.8	162.333	128	151	0.0414869	0.457133	13.0992	0.436641
Uqcrb	93.4717	105.76	107.407	99.8488	94.5525	101.881	100.587	102.008	96.457	90.1116	99.1173	96.9271	0.0414599	0.457133	13.101	0.010954
Tubgcp5	196.857	180.5	161.556	247	108.5	140.462	123.619	133.583	141	206.375	110.917	125.167	0.0416257	0.458126	13.0902	0.229653
Atxn7l1	99.5714	141.05	167.25	115.343	117.242	129.76	117.222	129.333	122.333	108.625	111.429	98.6	0.0418339	0.458974	13.0767	0.113711
Cep57	154.615	128.267	93.7143	118.353	92.4444	225.2	117.438	120.2	109.6	130.154	137.333	145.833	0.0420245	0.458974	13.0644	0.1719
Eif2b4	121.3	152.9	144.438	85.2273	107	115.2	114.688	111.2	97.0625	106.7	93.1111	78.8824	0.0420442	0.458974	13.0631	0.104505
Esrra	133	128.558	167	99.2143	115.931	96.2692	119.458	123.808	116.72	152.219	108.471	105.75	0.0419738	0.458974	13.0677	0.0777838
Golga1	274.6	190.111	181.625	226.5	94.1818	121.1	173.5	151.786	102.2	228.5	210.429	63	0.0418992	0.458974	13.0725	0.233437
Tmem67	47.6	179.667	128.571	184.6	166.091	181.2	162.6	40	91.25	159.5	144.1	98	0.0419643	0.458974	13.0683	0.233362
Zbtb38	130.8	120.364	91.5	77.9615	87.8571	129.45	100.206	91.3182	81.8947	117.594	95.4091	100.3	0.0420046	0.458974	13.0657	0.106225
Med20	123.846	184.105	148.214	100.25	103.619	147.526	151.429	145.731	156.375	207.571	146.059	121	0.042236	0.460534	13.0508	0.124294
Fbxl8	41.7143	114.727	147.571	74.6364	120.167	78.7143	110.167	71.9	106	94.25	101.333	77.4	0.042622	0.464204	13.0262	0.29605
Ehd4	99.8785	92.8	115.597	101.178	106.229	105.016	92.3256	96.5403	106.426	93.7174	102.049	95.8673	0.0431571	0.469489	12.9924	0.0101187
Rhbdd3	127.55	218	138.562	124.619	106.182	88.8462	124	177.364	134.833	131.727	133.267	160.25	0.0432675	0.469721	12.9855	0.145904
Tmem71	85	49	118.833	78.0909	101.524	130.75	136	98	193.5	157.857	120	127	0.0432782	0.469721	12.9848	0.196739
Ormdl1	125.783	158.69	92.6923	104.273	143.714	135.37	121.708	115.429	118.077	138.267	98.5	167.7	0.04339	0.470392	12.9778	0.0876878
Ank	100.424	112.382	94.0345	96.8974	92	134.136	113.628	113.766	115.619	91.129	111.833	108.182	0.0435375	0.470417	12.9686	0.0617552
Rel	85.8667	128.15	151.692	169.577	132.6	100.692	121.828	122.905	121.643	77.0909	132.952	92.8571	0.0434882	0.470417	12.9717	0.0953799
Smim26	104.308	162.321	123.037	131.111	110.4	142.423	117.545	122.737	136.56	130.722	120.077	125	0.0435423	0.470417	12.9683	0.093297
Nsd3	153.158	143.606	121.097	105.913	138.608	121.827	139.933	128.48	136.806	127.562	124.853	129.273	0.0436778	0.471014	12.9599	0.0500381
Slc11a1	93.4074	99.2884	104.036	77.7712	101.481	104.465	77.5065	92.2353	87.2333	84.2534	111.78	97.5575	0.0436977	0.471014	12.9586	0.013949
Ccnd3	107.1	95.7368	79.9697	112.367	117.812	116.718	107.973	104.383	116.205	108.792	115.34	110.704	0.0446125	0.471875	12.9024	0.0467478
Ei24	103.727	104.603	129.036	122.604	118.588	125.985	105.244	120.375	123.206	108.319	125.603	123.143	0.0446191	0.471875	12.902	0.0287991
Fancl	129.222	156.667	95.7778	175.636	125.857	46.8333	119.375	125.833	124.75	117.444	113	87.2	0.0443442	0.471875	12.9188	0.280843
Folr2	124	114.534	125.18	132.441	105.73	101.5	92.25	125	102.143	99.0968	79.3333	113.333	0.0446301	0.471875	12.9013	0.0474313
Gadd45a	134.276	133.568	135.565	146.298	115.93	120.893	124.114	118.654	131.833	120.047	111.133	103.767	0.0440698	0.471875	12.9356	0.0175995
Lias	115.083	132.256	129.824	75	110.097	132.7	112.409	99.5789	107.963	115.545	106.231	110.2	0.0444463	0.471875	12.9125	0.0896703
Mtfmt	213.333	205.733	188.562	149	129.125	151.667	179.667	137.615	170.083	132.875	108	126	0.044605	0.471875	12.9028	0.186998
Nfatc2ip	156.5	195.857	50	197.6	168.375	101.25	118.5	172	169.25	246.25		133.667	0.0443838	0.471875	12.9163	0.379893
Odc1	90.5278	98.9036	111.391	98.1981	99.6598	111.175	98.474	98.4775	116.418	100.978	105.792	119.306	0.0438896	0.471875	12.9467	0.0189557
Postn	153.75	113	134.2	142.5	47.3333	103.429	141.13	123.833	159.455	113.5	125.467	125	0.0445758	0.471875	12.9046	0.516185
Ralgds	71.875	119.706	139.588	99.069	99.125	121.053	105.8	104.186	124.769	114.25	107.25	89	0.0444229	0.471875	12.914	0.0802109
Smc6	105.789	123.861	105.769	95.45	153.957	144.667	122.161	105.333	126.034	119.227	128.167	95.7273	0.0443535	0.471875	12.9182	0.0971293
Smim14	134	123.784	129.578	119.944	117.674	119.396	120.993	116.022	119.274	113.128	116.702	105.458	0.0445953	0.471875	12.9034	0.0120032
Stxbp2	128.154	126.06	124.74	131.511	106.41	111.3	105.518	111.967	116.821	132.86	111.819	118.37	0.0443202	0.471875	12.9202	0.0226671
Utp14a	102.25	149.278	126.5	99	85.9	78.7333	106.316	112.667	114	106.071	128.692	82.1	0.043935	0.471875	12.9439	0.137701
Yrdc	191.833	115.423	118.364	123.267	112.65	168.333	120.115	118.552	140.63	172.941	116.8	140.643	0.0438952	0.471875	12.9464	0.118774
Zfp771	156	159.474	161.077	98.9167	95.5294	103.385	100.636	110.619	127.556	95.0667	102.769	108.143	0.0443232	0.471875	12.9201	0.127921
Hpf1	98.0667	130.84	104.804	70.16	116.556	115.148	110.072	118.082	93.1591	122.333	73.7917	88.5385	0.0447449	0.472558	12.8943	0.0632075
Scd2	134.45	152.667	114.931	109.571	138.462	128.143	104.718	103.667	115.656	150.895	103.273	135.167	0.0448509	0.472617	12.8879	0.0785848
Snrpb2	84.9375	119.815	106.712	113.481	82.7714	95.6163	103.149	116.391	105.047	114.128	104.148	85.3438	0.0448051	0.472617	12.8907	0.0334823
Mob1b	158.844	130.333	146.455	163	191.688	136.441	124.686	135.143	127.321	150.69	127.421	203	0.0450171	0.473234	12.8779	0.0634377
Tceal9	93.8587	82.2663	92.9222	98.4966	94.1429	95.8333	94.9533	101.914	105.456	101.547	94.2917	91.1224	0.0450002	0.473234	12.8789	0.0174985
Tmem109	101.714	112.928	118.964	102.441	115.689	92.6491	112.053	112.554	108.8	101.114	125.096	102.8	0.0450603	0.473234	12.8752	0.0360651
Abtb1	151.333	127.514	146.957	115.52	148.8	124.257	167.393	165.625	113.636	152.333	113.974	140.462	0.0451162	0.473293	12.8719	0.0593174
Ptges3	108.848	120.374	106.791	119.617	104.327	118.991	117.677	114.279	117.935	107.608	111.464	129.635	0.0451954	0.473595	12.8671	0.0159642
Cop1	164.864	105.705	100.889	107.182	106.667	105.209	93.7429	90.375	89.0606	98.25	109.769	93.1481	0.0453511	0.474596	12.8578	0.0581799
Mfsd14b	136.472	116.559	96.3438	110.453	120.08	138.946	118.143	131.164	119.603	130.46	118.771	114.233	0.0453918	0.474596	12.8553	0.0421486
Aldh1l1	97.2	89.25	162	113.062	93.5714	162.167	101.08	119.333	128.267	120.76	89.1538	109.167	0.0455842	0.475102	12.8438	0.145953
Fbxl19	134.5	143.667	161.667	206.833	84	96.7692	171.417	89.1429	113.692	106.643	59.4	110	0.0456136	0.475102	12.8421	0.285379
Gna12	118.296	100.973	121.312	104.124	114.268	106.3	108.325	115.392	96.6618	105.42	112.667	97.7258	0.0456433	0.475102	12.8403	0.0201259
Itm2c	83.9344	91.8683	105.027	97.5821	92.0343	91.084	82.25	88.1469	98.0984	89.4219	90.641	87.0777	0.0455194	0.475102	12.8477	0.00823043
Phyhd1	138.818	135.875	144.583	213.286	158.667	176.8	128.083	170.444	155.182	103.357	147.636	100.5	0.0456926	0.475102	12.8374	0.229239
Cnnm3	145.75	173.812	147.4	98.4615	130.667	127.769	144.1	80.125	104.125	83.6	123.87	131.5	0.0458145	0.475516	12.8301	0.185944
Sp100	128.59	118.143	125.629	122.879	117.055	141.333	113.022	112.256	121.352	124.197	120.613	110.411	0.0458335	0.475516	12.829	0.0129064
Ak3	105.632	118.531	96.9091	109.479	96.0556	145.767	108	104.969	113.441	101.742	116.323	107.3	0.0461084	0.475719	12.8127	0.0557074
Akip1	123.448	109.038	97.8125	104.875	129.745	128.136	97.5484	113.764	111.188	96.5714	92.8108	90.5882	0.0460428	0.475719	12.8166	0.0491057
Cox7c	103.905	106.134	100.922	97.5676	102.57	105.978	101.009	102.982	101.086	101.931	94.3932	88.5846	0.0461252	0.475719	12.8117	0.00453352
Dnajc4	101.111	124.478	89.5	109.957	124.905	148.346	122.615	103.304	100.25	116.636	119.815	110.286	0.0462575	0.475719	12.8039	0.0962701
Pfdn5	102.488	92.4343	91.649	97.3055	96.5149	100.868	91.2358	91.3623	90.8159	94.6886	93.0759	92.1939	0.0459891	0.475719	12.8198	0.00794777
Trim30d	128.8	129.714	181.037	188.563	175.4	163.932	146.75	165.5	176.036	186.865	153.795	157.903	0.0459422	0.475719	12.8225	0.0525514
Tubgcp3	105.143	145.556	133.25	156.083	210.462	234.333	159.154	131.273	156	105.333	153.25	113.75	0.0461636	0.475719	12.8095	0.173101
Wdr11	188.351	173.763	143.314	148.046	167.683	159.196	170.244	146.581	164.517	160.74	167.387	116.75	0.046228	0.475719	12.8057	0.0477823
Mrpl33	118.891	119.832	115.054	110.568	107.673	99.8899	97.6159	114.299	105.676	111.197	96.7553	97.5714	0.0463155	0.475796	12.8005	0.0183388
Psmb9	98.2766	102.924	121.055	98.7969	100.754	92.8269	95.4512	97.9818	129	100.3	99.984	99.75	0.0464631	0.476791	12.7919	0.0159898
Fads1	104.14	138.491	108.76	93.9535	96.7838	96.2593	119.325	109.554	85.5	77.4419	123.852	104.095	0.0465726	0.477395	12.7854	0.0477068
Commd3	120.71	118.685	114.819	131.273	123.19	108.859	112.523	109.079	108.13	116.541	125.865	124.959	0.0466895	0.478072	12.7786	0.0177235
Aldh9a1	86.4348	89.8961	109.564	99.4286	116.745	108.482	95.8462	105.339	114.213	109.548	105.465	81.8387	0.0477891	0.480485	12.7152	0.0382987
Atp6v0b	130.66	137.417	122.518	128.567	132.277	135.481	122.855	128.485	120.75	122.567	123.459	122.837	0.0470806	0.480485	12.7559	0.00566928
Calm2	104.412	102.509	113.108	103.595	101.735	109.754	102.942	102.014	107.715	109.611	103.881	98.5409	0.047607	0.480485	12.7256	0.00536039
Casp4	94.9474	157.708	128.13	151.932	118.316	105.327	125.818	151.214	139.12	126.288	117.843	76.0435	0.0472876	0.480485	12.7439	0.0437935
Ccdc71l	96.9074	137.32	120.911	123.683	132.364	115.473	125.385	108.263	134.341	113.632	144.533	103.583	0.0478616	0.480485	12.711	0.0365259
Cnot10	98.6471	146.304	102	190.222	130.625	111.286	143.24	124.529	168.9	148.083	179.667	134.25	0.0470797	0.480485	12.7559	0.140175
Cybc1	109.943	146.185	116.756	122.442	102.674	120.725	117.8	126.424	134.306	105.121	118.184	106.095	0.0471715	0.480485	12.7506	0.044273
Cyfip2	113.544	123.417	96.3846	110.766	101.289	117.973	109.552	115.338	87.2889	111.617	109.52	109.433	0.0479227	0.480485	12.7075	0.0273869
Daxx	118.714	70	96.95	101.361	93.6667	114.333	93.0909	77.6471	108.356	111.756	90.1163	84.2778	0.047562	0.480485	12.7281	0.0322231
Ddrgk1	82.8205	98.7753	94.5085	107.537	106.104	100.723	89.3274	91.2333	79.9318	87.9279	86.2308	71.1346	0.0471393	0.480485	12.7525	0.0233991
Emc2	98.0429	116.69	107.167	118.769	130.179	92.6471	119.733	131.269	113.825	108.763	109	117.636	0.0476924	0.480485	12.7207	0.0342875
Gas2l3	118.909	113.5	127.816	158.225	100.581	122.15	121.764	111.797	141.225	137.826	116.974	118	0.0477419	0.480485	12.7178	0.0543498
Gpalpp1	139.643	121.3	118.765	158.581	94.5357	98.625	134.259	133.68	126.444	119.682	113.043	82.1429	0.0475637	0.480485	12.728	0.0810704
H2az2	87.5333	99.0476	87.0645	109.259	120.775	86.6818	103.417	105.085	96.5135	109.119	107.922	130.067	0.0478265	0.480485	12.713	0.0436873
Lmbr1l	164.1	159.167	212.333	184.636	38.8	183.667	135.75	260.667	198.8	107.5	158.286	172.625	0.0479367	0.480485	12.7067	0.295506
Lrrc58	130.35	122.322	111.622	123.792	140.062	131.159	121.962	111.883	110.667	110.731	131.077	124.04	0.0475012	0.480485	12.7316	0.0381187
Mpc1	111.982	107.453	98.8101	121.91	113.829	117.909	105.686	105.542	99.6667	123.504	114.808	110.19	0.047502	0.480485	12.7316	0.0125682
Polr2d	120.636	116.857	92.3333	101.13	94.8571	115.25	119.036	131.2	95.2778	125.958	126.733	114.25	0.0479464	0.480485	12.7062	0.10768
Rgl1	90.6429	130.366	92.619	112.737	108.919	140.414	93.913	93.6667	93.3529	95.76	120.444	60.8333	0.0472477	0.480485	12.7462	0.0754214
Ywhab	105.189	103.579	101.877	100.209	118.067	110.199	102.389	104.673	102.046	99.4558	106.266	112.929	0.0474586	0.480485	12.7341	0.0103698
Cct6a	106.302	116.839	95.1185	102.737	96.3333	97.0545	98.4845	101.263	98.6746	89.9912	97.0349	84.72	0.0484058	0.481716	12.6802	0.0159298
Celf1	148.966	173.125	172.972	222.154	139.7	148.167	160.295	152.852	178.206	167.371	152.286	151	0.0482885	0.481716	12.6868	0.066077
Kmt2a	153.769	180.474	198.5	179.222	176.286	164.562	175.591	234.636	212.417	181.941	200.231	217	0.0481835	0.481716	12.6927	0.112325
Myof	119.81	132.968	124.511	139.532	145.969	135.69	113.4	133.94	141.898	131.455	137.136	118.36	0.0484276	0.481716	12.6789	0.0210264
Pank2	127.227	136.857	119.486	96.5238	113.15	107.606	129.517	99.0417	101.348	117.409	123.9	116.045	0.0481725	0.481716	12.6933	0.0641078
Tacc1	109.951	128.443	145.2	109.259	150.486	140.792	117.027	131.19	116.439	118.089	147.87	126.667	0.0484268	0.481716	12.679	0.0444876
Tra2a	168.962	201.171	166.977	138.902	212.758	194.611	166.815	193.286	156.436	172.789	200.727	182.5	0.0483361	0.481716	12.6841	0.057655
Mettl17	209.5	214	128.875	227.273	323.333	163.6	168.077	177.2	217.429	142.5	133.667	214	0.0486156	0.483076	12.6683	0.281519
Tiparp	75.4737	114.765	96.3889	162.95	140.333	86.7778	102.875	112.556	133	163.786	76.6667	114.333	0.0486746	0.483152	12.665	0.120619
Fech	140.828	111.438	125.714	134.864	93.9394	98.4839	112.848	104.275	114.486	111.484	105.462	118.917	0.0488348	0.483721	12.6561	0.0575275
Sec13	119.92	131.848	125.707	113.975	109.927	107.768	108.357	103.713	108.763	116.383	121.431	98.7059	0.0488082	0.483721	12.6575	0.0257791
Atg7	127.979	91.098	124.268	108.114	92.8986	124.062	98.2037	102.538	114.54	110.036	107.25	93.4167	0.0493197	0.484643	12.6291	0.0388586
Camk2d	136.386	143.311	126.191	120.381	140.475	131.772	119.027	122.731	118.435	113.411	140.723	112.615	0.049383	0.484643	12.6256	0.0255062
Fam217b	91.4	122.538	87.2	52.75	170.6	65	142.917	63.375	161.2	125.5	98.2	86	0.0493676	0.484643	12.6264	0.332274
Fen1	119	125.263	130.565	90.9091	105.868	91.7083	82.66	103.667	106.412	109.348	82.0417	83.9091	0.0491878	0.484643	12.6364	0.0722078
Lsm14b	86.2727	135.387	111.077	76.1481	147.095	97.4375	120.45	116.684	114.308	126.588	144.889	128.824	0.0493472	0.484643	12.6275	0.0963934
Mcrip2	120.5	134.688	90.8	126.769	91.5	111	108.105	92.6667	111.176	123.077	152.5	89.5	0.0491767	0.484643	12.637	0.145253
Rps6kc1	136.429	108.9	79.8947	123.533	94.4231	119.143	125.714	107.091	117.769	95.5	93.1765	127.444	0.0491848	0.484643	12.6365	0.10029
Sil1	81.5135	102.171	121.632	124.741	103.059	100.136	102.061	99.7143	78.8889	109.931	93.2692	90.25	0.0492118	0.484643	12.635	0.0625497
Ssr4	114.164	113.995	124.813	109.295	102.333	114.901	100.5	103.992	112.288	97.48	96.3696	109.662	0.0493913	0.484643	12.6251	0.0114878
Gpsm3	109.907	114.137	111.728	118.052	102.714	120.734	113.373	105.087	104.022	100.718	105.299	106.182	0.049478	0.484721	12.6203	0.015096
Polm	191.4	253.6	187.75	75.8333	219.25	135.6	180.4	191	254.333	82.5	164.25		0.0495023	0.484721	12.619	0.420632
Arid1b	91.125	114.605	125.852	84.5946	104.37	130.553	92.6486	85.7308	87.5769	111.032	100.444	94.037	0.049684	0.485726	12.6089	0.0525372
Usp39	128.308	110.69	125.769	94.4231	105.194	136.906	88.5789	113.333	131.423	112.36	110.207	111.25	0.0497082	0.485726	12.6076	0.0677828
Vsir	111.957	100.462	117.048	117.432	110.315	105.71	107.436	84.0088	110.58	108.297	106.838	108.364	0.0500105	0.488173	12.591	0.00965568
Atp6v1a	119.434	112.433	117.771	112.942	124.799	117.286	112	116.823	115.128	114.09	113.996	114.981	0.0500919	0.488204	12.5866	0.00404973
S100a10	97.4958	96.6301	111.096	101.679	102.972	107.548	91.3197	99.8	107.904	107.727	104.21	106.429	0.0501694	0.488204	12.5823	0.00635792
Trim13	68	142.5	88.7143	158.625	84.5	94.7778	107.714	82.625	138.222	115.714	90.8333	93.25	0.0501181	0.488204	12.5851	0.322696
Atraid	116.658	109.637	123.541	120.478	114.983	109.131	125.354	111.221	115.081	118.839	99.1698	106.294	0.0502307	0.488297	12.579	0.0189728
Map1lc3b	105.6	111.68	112.275	118.779	128.737	117.405	108.916	110.383	113.5	113.058	110.376	114.681	0.0503454	0.488906	12.5727	0.0102217
Ccdc9	114.926	108.447	154.059	190.95	138.407	137.13	142.227	129.176	135.684	116.5	105.2	148.4	0.0505686	0.490063	12.5606	0.080004
Snrnp25	106.214	118.107	95.5	100.632	144.231	92.7	97.5625	92.1765	111.444	97.2593	105.188	156.5	0.0505318	0.490063	12.5626	0.117408
3110082I17Rik	91.6154	147.35	157.357	144.364	103.294	172.5	158	102.375	83.1429	105.947	122.308	164.2	0.0507296	0.491116	12.5519	0.149428
Otud7b	81.5333	108.846	107.962	149.48	187.467	119.909	112.867	119.538	126.3	123.474	120.455	127.667	0.050839	0.49167	12.546	0.112018
Aspscr1	142.467	145.409	136.946	157.781	96.4722	130.75	135.023	125.414	131.333	125.184	134.97	108.176	0.0509596	0.491826	12.5395	0.0564844
Vamp2	110.042	142.917	157.333	205.4	160.067	126.667	145.125	144.2	146.636	179	151.692	69.1667	0.0509227	0.491826	12.5415	0.0700644
Gbp9	83.5714	69.7692	145.214	167.12	124.533	134.15	111.6	81.875	165.143	157.204	123.646	129.294	0.0511506	0.492036	12.5293	0.122836
Ppm1d	78	109.9	73.3333	131.167	128.333	89.5556	87.3	209.5	124	77.6667	115.143	89	0.0511906	0.492036	12.5271	0.227766
Selplg	93.9583	94.5603	100.917	107.211	105.929	97.8601	98.3739	100.024	118.734	100.142	103.739	88.1538	0.0510761	0.492036	12.5333	0.0131514
Zfp36l2	114.55	116.696	114.696	138.325	127.122	122.015	121.173	117.529	121.891	129.582	127.65	107.131	0.051188	0.492036	12.5273	0.00987956
Sgms1	96.7391	150.3	135.737	122.688	111.722	105.6	83.1765	121.222	123.947	105.45	97.3913	111.474	0.0513716	0.4931	12.5175	0.0828972
Sh3glb2	127.69	112.548	178.19	132.235	119.756	111	124.108	124.345	113.75	142	127.645	128.333	0.0514061	0.4931	12.5156	0.0707098
Gabarapl1	109.739	115.924	130.469	116.089	109.369	113.49	113.182	115.262	113.341	115.89	117.054	106.729	0.0515919	0.494378	12.5057	0.0139573
Ndufa2	89.2636	95.1433	95.5851	90.1182	97.3139	95.9474	92.3204	95.51	93.9104	95.732	93.6872	87.4519	0.0516843	0.49476	12.5008	0.00697981
Pqbp1	103.4	108.872	88.1304	84.2821	111.56	89.6897	101.857	94.4062	89.9615	77.3478	99.5357	111.235	0.0518293	0.495644	12.4931	0.0709838
Faf1	119.056	78.6774	93.619	73.3243	94.6774	74.6429	91	83.44	93.1429	102.778	92.1333	57.625	0.0519974	0.496747	12.4843	0.0756622
Cox8a	107.33	112.161	104.004	101.96	104.153	109.284	103.885	108.689	103.236	104.111	113.384	106.121	0.0523297	0.499414	12.4668	0.00443027
Tsfm	136.722	122.7	164.667	89.7333	99.9412	105.5	90.75	112.68	104.214	92.1538	116.8	105.667	0.0525182	0.500705	12.4569	0.112224
Eif3i	96.8493	94.4538	83.5281	94.3	95.8889	94.0779	91.05	80.6786	89.2614	77.9677	97.6471	84.575	0.0527342	0.501241	12.4456	0.023706
Ly86	82.0625	95.0909	108.741	116.382	107.049	102.347	77.5294	108.333	134.143	102.182	92.96	72.6154	0.0527029	0.501241	12.4473	0.0373792
Rpf2	130.5	129.111	93.3333	96.2857	122.7	69.0769	94.7	80.25	116.625	94.8846	80.3077	102.889	0.0527007	0.501241	12.4474	0.123242
Hdac5	158.739	121.053	106.794	107.286	132.711	122.982	134.297	112.432	123.067	107.316	103.972	101.031	0.0530144	0.503396	12.4311	0.0440819
Sidt2	127.902	113.681	122.419	133.35	147.894	144.82	128.373	107.413	151.554	141.511	135.419	118.2	0.0531979	0.50427	12.4216	0.0287537
Zfp764	145.222	143.6	166.714	101.889	72.2	143.25	98.4167	61.6667	184	94.8	87.6	43	0.0532136	0.50427	12.4208	0.2218
Nedd4l	121.273	158.8	141.684	130.643	137.952	111.789	88.0909	127.941	120	104.55	103.9	158.167	0.0533279	0.504844	12.4149	0.102602
Themis2	104.512	106.9	124.57	125.458	108.19	130.384	113.421	106.674	118.933	112.076	108.157	109.286	0.0533836	0.504864	12.412	0.0131902
C1qtnf12	114.375	76.5714	110.471	123.542	113.333	89.2069	95.4667	103.786	101.524	109.529	106.333	93.3	0.0537261	0.506246	12.3944	0.0872848
Dnajb4	83.7692	132.079	132.28	117.529	126.4	82.6923	116.44	106.077	123.818	120.529	129.071	150.75	0.0537297	0.506246	12.3943	0.0854776
Map4k3	148.742	156.885	110.577	138.276	166.404	149.878	143.393	136	132.706	131.714	123.182	130.75	0.0535906	0.506246	12.4014	0.0435136
Vmn2r89	135	161.222	65.1667	196	219.5	41	208	124.667	249		168		0.0537449	0.506246	12.3935	0.387296
Agk	63.3333	164	148.917	182.8	123.571	108.588	111.125	122.692	121.462	174.25	91.2	29.5	0.0538644	0.506864	12.3874	0.190575
Ambra1	138.786	99.04	129.778	127.625	160.455	152.6	135.957	114.812	126.524	140.438	125.2	128.917	0.0541375	0.507404	12.3735	0.0959183
Jund	87.7353	108.473	108.773	100.524	105.538	104.004	100.022	95.0573	102.634	110.159	100.846	107.188	0.0540404	0.507404	12.3784	0.0096255
Lrp11	115	155.2	112	90.0588	92.9231	122.231	88.8571	129	143.846	99.125	125.25	138.778	0.054134	0.507404	12.3736	0.174277
Snx24	136.633	198.152	125.571	131.667	161.211	114.464	134.878	92.4545	130.192	149	122.44	130.923	0.0540097	0.507404	12.38	0.0819865
Setd1b	143.909	91.8	140.6	140.737	155.917	97.7778	103.688	144.571	107.933	138.842	109.842	123.444	0.0542445	0.507901	12.368	0.13019
Mtrex	125.062	174.3	155	162.7	111.941	94.8333	111.788	120.583	132.292	124.161	140.208	110.1	0.0543175	0.508079	12.3643	0.124892
1810030O07Rik	140.16	124.269	115.474	97.0968	87.25	135.44	100.25	105.967	113.174	125.069	131.5	126.357	0.0547229	0.509976	12.3439	0.0812096
Atp11a	132.72	152.526	154.68	132.467	201.333	134.314	125.345	148.083	153.235	105.957	117.364	116.696	0.0547371	0.509976	12.3431	0.0701315
Opa3	124.545	77.2778	132.846	98.5556	116.625	113.615	112.077	92.0385	93.9375	94.6	118.471	118.667	0.0546538	0.509976	12.3473	0.152436
Slc25a39	110.687	103.536	105.173	102.671	108.782	116.53	109.55	111.174	106.117	111.978	113.365	106.743	0.0546997	0.509976	12.345	0.012533
Egln2	114.857	115.372	125.419	100.211	126.667	109.588	109.471	112.621	96.619	72.48	102.719	103.286	0.0548099	0.510149	12.3395	0.0563447
Cnep1r1	73.5556	117.388	129.474	143.158	79.8636	131.893	131.767	134.421	131.966	106.321	144.828	120.417	0.0552308	0.513052	12.3184	0.0755731
H2-Q7	109	140.4	169.5	137.188	117.333	126.725	129.2	112.333	117.6	154.5	98.9286	91.6	0.0552138	0.513052	12.3193	0.128326
Lrrc27	111.2	169.071	154.19	120.684	115.158	158.5	108.118	91.5714	159.778	105	100	121.5	0.0554895	0.514835	12.3055	0.139836
Zfp422	142.231	152.154	150.857	130.25	141.545	203.125	163.294	150.667	128.182	127.615	115	177	0.0555321	0.514835	12.3034	0.153793
Hibadh	118.676	113	128	93.3043	98.2941	101.917	83.8438	100.359	126.333	136.032	100.024	115.857	0.0556293	0.514937	12.2986	0.0530112
Nin	118.75	132.368	147.5	141.889	72.1111	97.8889	127.552	103.933	126.25	99.5333	155.923	124.25	0.0556657	0.514937	12.2968	0.111789
Ormdl2	95.2143	114.535	110.732	104.882	129.28	120	91.1667	92	109.75	119.775	105.292	92.8571	0.0557073	0.514937	12.2947	0.0569201
Tm2d1	116.545	126.812	145.588	144.632	112.853	111.84	124.875	116.683	112.556	124.167	125.851	115.826	0.0558337	0.515598	12.2885	0.0518502
Haus7	149.111	123.462	109.143	69.7778	57	112.273	86.8333	100.278	66.3333	89.125	107.333	100.333	0.0559347	0.515727	12.2835	0.231764
Serinc1	114.464	123.228	113.077	110.865	114.431	118.642	114.867	114.534	112.791	118.48	102.853	108.743	0.0559572	0.515727	12.2824	0.0092003
Hsd3b7	147.026	184.571	143.189	138.053	137.75	143.324	171.226	177.91	166.167	134.714	174.793	127.75	0.0560217	0.515816	12.2792	0.0451442
Fastk	154.241	140.976	110.37	125.921	170.267	151.028	141.205	129.119	119.267	140.121	108.955	118.667	0.0561496	0.516092	12.2729	0.0607571
Phf23	76.35	108.2	100.685	122.855	99.8354	106.208	94.2	91.8163	107.605	101.226	102.315	88.2903	0.0561614	0.516092	12.2724	0.0319593
Anxa6	108.488	102.047	125.75	108.52	104.183	107.113	97.5833	93.5217	109.138	106.577	107.303	91.7347	0.0562446	0.516353	12.2683	0.0139889
Slc25a5	109.809	107.053	100.186	95.6	99.5075	102.582	98.3848	101.862	99.769	105.425	105.005	90.6897	0.0563781	0.517074	12.2617	0.00641976
Neu1	116.713	114.759	133.938	139.628	124.088	110.676	119.353	136.405	105.03	121.258	130.214	144.629	0.0565454	0.5176	12.2536	0.0205252
Tnfrsf23	87.25	131.652	125	129.833	153.462	88.6364	89.5333	78	105.067	111.625	110.5	123.167	0.056511	0.5176	12.2552	0.147654
Ipo5	112.367	112.813	114.353	95.6768	100.082	115.917	100.137	96.1136	91.4615	99.1587	96.9327	100.016	0.0567242	0.517902	12.2448	0.0178496
Selenom	99.9481	91.046	108.313	115.906	101.3	108.789	100.5	87.6733	106.043	102.768	100.216	109.566	0.0567605	0.517902	12.2431	0.0225887
Taf1c	98.5	163.182	115.5	224.091	138.333	184.25	122.143	194.25	122	239.5	211.778	138.5	0.0567986	0.517902	12.2412	0.291458
Unc93b1	116.737	121.778	137.156	133.728	124.957	126.752	125.241	136.289	138.951	139.079	124.672	118.29	0.0566895	0.517902	12.2465	0.00569606
Sys1	79.2941	94.1429	91.2703	106.942	79.8431	90	90.0784	102.085	106.31	86.0769	98.3953	85.3448	0.0569721	0.518981	12.2328	0.0418932
Cdc25b	135.318	154.917	111.667	102.615	225.125	128.727	127.29	134.5	94.6316	147.125	156.611	112.286	0.0573988	0.519239	12.2122	0.16729
Cmip	100.444	94.0667	133.182	85.1429	99.5	85.9231	73.7333	77.8889	69.2222	67.7778	96.6875	87.25	0.057327	0.519239	12.2157	0.508986
Inppl1	130.621	145.324	120.246	118.1	142.406	141.847	115.913	136.963	134.048	125.938	140.283	136.357	0.0576074	0.519239	12.2022	0.026996
Mcoln1	132.705	99.9324	153.128	122.837	125.837	131.396	121.169	148.362	134.794	138.679	131.909	138.182	0.0575665	0.519239	12.2041	0.0394956
Nfatc1	139.312	141.966	119.947	90	115.789	138.436	106.077	92.3333	128.667	124.727	131.828	118.286	0.0574683	0.519239	12.2089	0.0663525
Ppib	108.915	108.734	112.007	111.73	102.019	106.856	98.4261	108.688	115.239	99.0383	109.017	95.8649	0.057222	0.519239	12.2207	0.00624462
Reep5	99.5724	101.115	105.823	98.8839	99.0445	104.788	102.95	103.463	105.11	97.2033	103.702	98.1512	0.0571641	0.519239	12.2235	0.00543509
Snhg3	151.895	272.111	213.25	174.182	227.308	170.786	159.87	190.333	194.615	206.667	215.4	107.3	0.0574573	0.519239	12.2094	0.13566
Tasp1	162	145	105.75	14	135	104.583	118	172	87	164.667		160	0.0572625	0.519239	12.2188	0.407292
Vta1	108.105	125.803	124.564	136.8	99.7381	94.7551	104.655	123.162	139.324	91.8571	102.25	99.7083	0.0575742	0.519239	12.2038	0.0462264
Xrcc1	163.294	123.321	123.45	129.759	125.467	83.1154	162.474	84.6667	99.1765	91.64	130.548	163.111	0.0575884	0.519239	12.2031	0.0830142
Cby1	79.4	108.333	132.714	145.111	83.3077	113.667	121.385	112.875	73.5	134.583	112.364	70	0.0577986	0.519966	12.193	0.217733
Gnpda1	122.766	139.401	141.08	136.769	113.986	120.841	120.607	118.026	143.183	110.639	119.492	104.66	0.0577532	0.519966	12.1952	0.0147285
Ddx19a	112.192	129.88	112.643	112.556	100.556	78.8333	112.289	88.7083	120.222	117.562	91.5357	116.167	0.0579014	0.520261	12.1881	0.0651771
Mrps12	101.545	120	126.4	123.686	94.3125	96.3226	105.435	117.488	125.516	110.312	134.219	108.45	0.0579972	0.520261	12.1835	0.0564053
Plod3	114	111	143.516	127.313	120.825	115.307	128.593	111.814	127.662	116.359	119.402	125.489	0.0579434	0.520261	12.1861	0.0255474
Cox6a1	99.2428	97.8204	93.8892	93.428	98.3604	101.995	99.1996	98.1063	95.1488	98.4886	96.8667	94.2834	0.0581952	0.52154	12.1741	0.00462894
Yy1	96.4186	123.656	122.283	131.938	102.547	135.061	104	135.07	108.192	95.6909	119.845	131.2	0.058289	0.521884	12.1697	0.0310451
Kif22	55.6	185.143	89	129.2	114.5	156	146.25	121.643	176.667	98.4286	138.5	114	0.0585566	0.523283	12.157	0.528565
Sec62	97.125	110.92	111.039	105.326	123.237	113	97.6232	104.143	102	118.803	104.88	91.8333	0.0585363	0.523283	12.158	0.0258131
Arrdc3	114.214	115.154	148.25	125.969	128.103	104.875	106.036	121.486	105.492	102.409	114.009	97.0392	0.0589586	0.524003	12.1381	0.025936
Gda	73.3077	118.4	91.6364	148.643	82.6471	136.222	110.2	84.1053	115.444	125.957	134.571	127.375	0.0588712	0.524003	12.1422	0.11564
Hectd1	115.2	134.569	113.345	110.939	146.649	145.143	130.735	146.308	128.133	147.026	127.4	133.368	0.0589449	0.524003	12.1387	0.0534745
Mmaa	109	103.6	118.75	137.143	147.917	26.25	124.857	67.25	134.714	115.636	187.875	156.8	0.0590812	0.524003	12.1323	0.288865
Mthfsd	147.727	88.7692	121.643	108.778	140.562	119.75	82.1111	129.467	152.636	160.25	190.667	138	0.0591531	0.524003	12.129	0.163905
Ncf1	127.269	130.297	115.361	115.864	119.019	126.823	122.377	131.117	109.3	125.282	115.955	115.036	0.0588551	0.524003	12.1429	0.00781398
Polr2h	144.5	91.3529	131.941	97	100.714	65.1875	67.5833	122.941	125.417	110.643	91.8571	144	0.0592196	0.524003	12.1258	0.170787
Psmd1	107.455	109.262	96.6786	88.1415	109.425	94.125	96.9928	107.733	102.541	101.681	95.9726	97.1707	0.0589325	0.524003	12.1393	0.151741
Psph	92	113.85	136.667	154.455	136.875	99	76.4667	106.417	106.25	95.0909	124.5	112	0.0591276	0.524003	12.1301	0.189534
Sdha	134.426	112.331	118.806	108.841	115.712	107.787	118.378	116.142	109.109	109.746	110.419	100.104	0.0592465	0.524003	12.1246	0.0140493
Slc35b1	121.78	120.057	128.457	102.467	116.939	125.733	106.417	111.362	140.672	107.895	117.606	115.842	0.0592497	0.524003	12.1244	0.0358711
Bri3	110.89	114.2	113.228	113.144	104.94	105.13	102.733	112.794	103.789	107.496	103.902	103.807	0.0594477	0.52436	12.1152	0.00350657
Itpk1	53.25	103.25	137	96.2	110.833	98.6667	128.833	84.25	170.667	91.3571	82.375	118.455	0.0594572	0.52436	12.1148	0.147741
Uvrag	142.652	140.846	108.743	92.3878	111.108	99.4074	129.042	140.067	99.2222	83.9643	112.852	113.455	0.0593492	0.52436	12.1198	0.059999
Gdi2	111.273	106.845	107.03	105.131	99.5193	102.791	103.674	104.759	103.862	102.71	97.9455	93.9274	0.0596899	0.524473	12.1039	0.00475037
Naa35	116.5	107.24	140.765	176.588	80.3333	139.789	124.381	160.538	148.842	130.6	110.846	129.375	0.0596799	0.524473	12.1044	0.114192
Ulk1	123.7	121.737	163.562	141.756	105.194	106.4	110.435	111.789	127.857	135	179	142.875	0.059693	0.524473	12.1038	0.0785961
Zbtb21	134.5	125.136	162.118	105.667	103.242	143.308	99.7273	115.19	134.133	103.931	151.7	156.538	0.0596375	0.524473	12.1064	0.0812508
Golim4	146.75	115.316	146.167	73.8182	132.429	168.111	147.462	125.5	176.9	124.111	116.5	137.333	0.0598311	0.524707	12.0974	0.212235
Rps18-ps6	72.8148	77.2727	71.7606	66.8333	71.2899	73.6467	65.5207	70.9302	64.6691	64.6296	67.4315	62.2479	0.0598122	0.524707	12.0983	0.012816
B4galt7	132.023	154.468	144.091	140.955	142	135.739	133.557	153.923	117.718	114.667	126.432	101.9	0.0602339	0.525415	12.0788	0.0518403
Gcnt1	126.036	113.892	136.558	130.672	133.4	127.788	130.381	126.684	120.432	134.553	118.125	110.5	0.0604143	0.525415	12.0705	0.0147742
Gm37567	147.759	138.931	132.714	121.697	130.688	122.321	155.366	109.575	127.512	138.705	132.619	144.865	0.0601067	0.525415	12.0847	0.0327497
Incenp	101.056	136.629	112.286	95.1667	70.1429	176.778	128.725	135.71	132.833	113.636	166.389	83.9091	0.0604096	0.525415	12.0707	0.100589
Inpp5k	143	104.083	155.45	134.947	138.7	158.17	129.742	112.071	139.929	131.574	123.425	131.812	0.0603154	0.525415	12.075	0.0522729
Kmt2c	174.333	104.846	97.3333	152.273	221	188.154	152.471	118.062	154.786	161.917	162.188	169.667	0.0601204	0.525415	12.084	0.170198
Mars1	110.448	127.841	113.25	100.433	82.6786	97.4815	97.8537	95.7619	88.0357	106.719	103.591	66.8	0.0602931	0.525415	12.0761	0.0649251
Rab11a	120.335	113.671	119.277	132.676	114.14	116.505	120.507	115.02	120.356	115.233	103	118.375	0.0602791	0.525415	12.0767	0.0104924
Ubn1	136.04	154.378	87.6875	142.879	157.056	165.059	115.759	129.692	147.278	144.303	144.783	137.071	0.0602666	0.525415	12.0773	0.0670961
Mib2	187.545	160.286	92.4	185.222	159.769	97.3158	119	138.692	134.154	82.375	174.2	150.571	0.0606739	0.526899	12.0586	0.121804
Mthfd1	131.875	116.733	115.077	63	133	168.143	112.294	95.8235	84.1818	90.75	100.333	107	0.0606969	0.526899	12.0576	0.172251
Svil	136.111	113.214	173.5	68.5714	162.286	207.444	65.4444	121.429	135	232	191.6	204	0.0607716	0.52706	12.0542	0.246003
Thumpd1	81.7647	94.7241	112.4	110.762	81.375	78.92	83.6486	89.5789	94.8	89.0952	85	110.375	0.0608505	0.527259	12.0506	0.143459
Ddx46	118.467	163.351	131.429	167.3	147.04	120.194	138.725	124.214	144.905	132.346	139.188	182.7	0.0611316	0.529207	12.0378	0.065069
Rab5if	104.757	98.6536	110.035	108.527	115.341	119.802	95.0674	97.747	108.53	98.8721	97.8367	101.388	0.0613004	0.529281	12.0301	0.013578
Rpl21	93.5103	94.666	97.1975	93.7978	98.0729	98.7871	94.4619	93.6478	90.9708	90.6791	93.1384	97.4181	0.0613159	0.529281	12.0294	0.00232497
Smarcd2	103.119	119.308	122.8	139.34	102.612	134.151	119.32	123.275	131.617	112.966	87.7576	143.261	0.0613437	0.529281	12.0282	0.0363388
Thap1	164.3	70.2857	113.091	113.8	82	103	135	74.0833	113.333	126.25	102.6	184	0.0613651	0.529281	12.0272	0.222726
Clcn6	129.2	223	274.4	128	156.4	109.5	146.071	142.75	150.357	237.429	212.333	131.5	0.0615451	0.530347	12.0191	0.308181
Cdc25a	148.625	150.556	77.5	82.25	77	122.9	95.7059	123.286	83.3333	129.375	31	22	0.0616428	0.530704	12.0146	0.226691
Nosip	119.929	132.791	116.065	103.926	96.6522	98.9855	104.733	125.657	102	115.722	104.895	81.56	0.0619765	0.532744	11.9997	0.0393431
Zdhhc16	164.5	166.037	113.429	94.5455	146.714	119.133	95.3333	171.05	115.172	86.7143	166	87.7143	0.061993	0.532744	11.9989	0.129021
Bud13	132.2	123.571	56.25	46.25	105.875	123.286	85.3333	96.7273	96.3333	115.167	64	135	0.0620562	0.5328	11.9961	0.324219
Dock10	134.522	172.25	132.513	180.057	115.333	161.433	147.5	137.912	151.605	147.526	141.536	181.462	0.0622712	0.533672	11.9865	0.0688878
Mafg	128.603	151.192	145.671	175.03	151.667	155.08	133.767	132.422	143.753	118.385	146.179	82.1429	0.0622509	0.533672	11.9874	0.0368842
Eva1b	102.875	78.3571	56.1667	93.9412	94.2432	111.368	121.2	112.375	122.692	131.667	103.5	134.5	0.0623799	0.534117	11.9816	0.082066
Aldh2	107.577	111.38	110.988	109.845	105.801	113.035	109.995	108.943	107.331	105.612	102.439	101.577	0.0640412	0.536206	11.9085	0.00403952
Arl5b	244.2	117.75	22.6667	133.091	93.5	115	67.5	131.833	81.25	176.75	76.5	143	0.0641054	0.536206	11.9057	0.330715
Arl6	101.556	138.625	132.714	117.5	142.857	88.2857	109.714	127.714	79.6667	107.2	126.25	113.429	0.0628944	0.536206	11.9588	0.189822
Bivm	149	202.667	101.067	114.533	78.4118	152.222	143.692	130.5	109	93.2	94.3333	74	0.063514	0.536206	11.9315	0.195599
Borcs8	112.167	73.0526	99.8125	108.517	116.226	122.75	111.409	107.692	130.824	124.32	110.476	82.0714	0.0630973	0.536206	11.9498	0.0963697
C130026I21Rik	161	125.9	110.2	150.923	107.974	122.933	129.8	119.429	158	111.226	100.64	89.5882	0.0637811	0.536206	11.9198	0.441476
Card19	123.115	131.29	128.264	137.183	141.889	142.605	124.754	130.404	131.522	139.243	130.481	128.488	0.0639138	0.536206	11.9141	0.0144764
Cyren	219.5	165.091	179	139.923	128.867	129.615	115.167	128.133	119.75	142.875	214.5	172	0.0635438	0.536206	11.9302	0.0701778
Gm20503	58.8	97	140.5	81.2	107.5	99.375	99.6667	91	68.1429	84.5556	114.667	117.667	0.0636684	0.536206	11.9248	0.305763
Igtp	163.2	101	121.026	104.879	100.519	110.182	126.167	159.333	122.491	107.009	118.402	102.233	0.0634443	0.536206	11.9346	0.0223494
Metrnl	102.134	111.766	115.798	102.581	104.536	106.66	94.2869	105.121	105.263	100.145	102.199	103.387	0.0627296	0.536206	11.9661	0.00667751
Nacc1	104.109	130.27	104.466	109.28	95.3091	127.745	107.571	117.188	107.216	109.686	96.2449	79.8421	0.0640989	0.536206	11.906	0.0365215
Neat1	298.707	299.956	284.447	298.464	278	298.358	282.31	282.52	287.27	295.838	291.303	251.857	0.0628167	0.536206	11.9622	0.00804995
Noc4l	134.25	178.211	105.417	126.9	124.929	109.706	120.625	111.5	157.462	152.077	121.4	154	0.0639204	0.536206	11.9138	0.140162
Pkd2l2	104.5	157.333	187.143	237.833	195.143	240.364					142		0.063294	0.536206	11.9412	0.796078
Ranbp1	111.043	111.211	95.1923	103.444	116.852	98.7015	107.678	109.377	100.036	101.722	107.973	104.838	0.0639971	0.536206	11.9104	0.0217344
Rrp8	110.273	115.158	127.615	164.625	86.5	112.474	134.214	121.273	71.1429	93	176.429	133.2	0.0637088	0.536206	11.923	0.129598
Scp2	105.773	120.707	121.982	125.536	113.265	121.35	122.774	115.439	117.305	123.677	115.12	117.691	0.0637404	0.536206	11.9216	0.0121649
Slc16a1	110.571	103.895	148.455	127.667	71.8333	158.125	117.429	96	114	157.5	124.273	102	0.0632124	0.536206	11.9448	0.199079
Snord3b2	4.69565	5.86207	4.97143	6.32	16.3333	27.9231	11.7308	6.89796	7.46429	5.88462	8.18182	10	0.0628139	0.536206	11.9624	0.0892713
Sord	133.594	101.426	104.581	113.5	118.596	124.229	130.941	107.634	100.833	112.919	118.545	125.118	0.0633494	0.536206	11.9387	0.0396636
Suco	133.6	168	70.4	115.2	143	182.222	155	131.125	116.778	136.273	84.25	194.333	0.0633609	0.536206	11.9382	0.151117
Tyms	102.182	81.5	139.125	225.4	153	89.5	112.182	113.176	128	95.8	155	110.5	0.0639572	0.536206	11.9122	0.201901
Wsb2	99.785	102.688	113.965	111.277	119.296	114.861	102.043	103	105.982	119.015	108.876	87.66	0.0635436	0.536206	11.9302	0.0161437
Xylt1	122	121.821	146.533	86.875	141.538	104.688	187.889	148.692	119.516	99.4286	147.267	121.2	0.0634467	0.536206	11.9345	0.111537
Zfp451	104.231	117.852	159.25	160.7	87.4615	146.467	96.8824	103.5	134.885	155.889	143	100.571	0.0632374	0.536206	11.9437	0.135724
Rassf2	113.371	111.746	138.367	143.656	124.149	145.425	127.925	118.538	123	137.441	109.591	118.267	0.0642438	0.536887	11.8997	0.0349992
Ephx1	101.656	96.5128	101.914	130.283	112.11	105.811	111.945	107.6	108.705	119.578	117.076	108.343	0.064392	0.537648	11.8933	0.0279185
Tcof1	124.923	132.938	121.692	85.52	78.3	127.724	132	114.526	103.706	98.1176	102.333	122.941	0.0645037	0.538103	11.8885	0.09361
Maskbp3	183.867	146.444	147.269	121.36	124.677	149.64	122.211	127	95.5882	105	119	130.824	0.064647	0.538434	11.8823	0.0771577
Mfsd13a	79.2	115.467	102.737	126.643	137.192	95.4	107.08	103.48	89.9375	122.214	111.033	93.6429	0.0646825	0.538434	11.8808	0.100684
Tmod3	109.571	129.328	89.439	111.172	126.237	110.398	117.105	124.014	109.705	98.5932	113.521	119.405	0.0647151	0.538434	11.8794	0.0277555
Abca1	123.842	143.986	141.194	152.472	125.193	133.454	123.654	136.807	154.978	135.442	121.976	119.358	0.0660996	0.538501	11.8203	0.0170076
Acsl4	93.3846	120.698	122.378	145.2	116.435	96.9259	115.194	131	128.222	119.22	151.647	121.684	0.0653235	0.538501	11.8533	0.0531537
Actr3	105.566	115.259	111.566	107.539	103.927	106.804	101.434	112.518	109.347	108.188	100.262	96.2837	0.065736	0.538501	11.8357	0.00360955
Akr1a1	108.796	111.4	111.962	112.308	109.513	109.381	106.869	107.895	112.649	110.547	106.347	105.169	0.06492	0.538501	11.8705	0.00129662
Atg101	112.783	116.385	75.5909	119.323	110.542	85.7778	110.615	125.12	98.5926	115.923	90.2105	86.5833	0.065009	0.538501	11.8667	0.080726
Blvrb	99.1768	98.5039	108.302	100.928	101.122	107.197	98.9877	94.2339	107.201	96.4007	100.406	102.058	0.0660287	0.538501	11.8233	0.00591757
C3	117.333	143.333	177.25	167.667	142.343	129.523	59	209.5	135.2	134.871	111.371	142.273	0.065499	0.538501	11.8458	0.102119
Ccnl2	248.514	255.339	210.8	204.571	188.193	187.294	208.128	188.229	185.636	182.189	220.974	154	0.0658109	0.538501	11.8325	0.0465848
Fhl3	166.667	145.836	159.558	144.75	164.294	124.62	147.915	155.042	153.862	154.136	154.516	131.05	0.0653518	0.538501	11.8521	0.0361343
Lrrc57	153.615	132.179	122.182	134.13	99	163.812	130.542	119.944	141.636	127.5	132.529	111.833	0.0659365	0.538501	11.8272	0.0896
Mdn1	180	196.75	76.8	88	243	258.167	159	157	135.286	85.3333	130.25	134.667	0.0651015	0.538501	11.8628	0.409061
Naa16	113.583	93.7143	136.429	192.8	236	143	113.455	158	40	62	137.2		0.0650059	0.538501	11.8669	0.282544
Ncl	75.3235	81.0816	77.1765	68.8137	80.5629	88.4468	73.51	69.3234	73.5222	81.539	68.8345	66.4151	0.0657712	0.538501	11.8342	0.0107388
Oma1	133.583	156.478	124	127	96.64	158.75	108	110.765	137.667	128.429	112.267	93.4545	0.0652144	0.538501	11.8579	0.104937
Otud4	203.059	171.393	141.682	156	161.708	125.077	177.037	127.042	130.647	131.8	119	114.6	0.065413	0.538501	11.8494	0.0884287
Rab29	107.091	88.9091	117.8	120.239	134.103	131.395	144.407	108.875	117.737	128.357	137	125.353	0.0652017	0.538501	11.8585	0.0790565
Ranbp3	79.05	137.463	134.455	105.729	109.438	129.949	118.822	126.222	121.906	125.423	97	107.556	0.0648004	0.538501	11.8757	0.0557544
Rnf4	114.507	104.421	145.237	123.24	111.514	108.373	110.105	120.04	115.981	127.26	95.8095	101.13	0.0658727	0.538501	11.8299	0.0271952
Sharpin	116.326	145.39	167.371	149.955	125.947	139.843	148.734	136.339	156.304	108.706	125.167	133.333	0.0656188	0.538501	11.8407	0.0364329
Slc17a9	211.556	194	126.167	92.25	213.2	118.333	132.833	199.6	130.667	113.833	97.5	180.333	0.0656867	0.538501	11.8378	0.34817
Tbc1d15	131.278	143.481	107.568	113.659	118.957	94.8974	113.423	114.978	139.421	157.8	111.564	117.714	0.0657278	0.538501	11.8361	0.0458762
Tbxas1	132.651	129.19	114.443	117.429	101.269	109.162	125.886	116.59	115.896	110.417	124.908	99.619	0.066102	0.538501	11.8202	0.018822
Trex1	89.5455	108.643	116.696	98.115	108.744	90.1062	94.8333	132.231	116.381	102.126	94.4	78.617	0.0657259	0.538501	11.8361	0.0258431
Zeb2os	117.512	117.934	125.525	108.957	101.3	123.156	119.636	127.58	133.512	104.054	146.433	111.25	0.0661538	0.538501	11.818	0.0442623
Zscan26	95.0909	194.467	190.308	212.391	196.526	171.238	171.667	128.25	240.625	185	214.765	187.667	0.0657259	0.538501	11.8361	0.111662
Dnajc8	120.281	118.487	100.831	124.14	98.1429	101.563	118.023	102.933	107.589	104.807	105.4	115.27	0.0666643	0.540319	11.7966	0.0263316
Ikbkg	156.368	154.595	133.877	114.771	121.92	147.941	130.971	127.132	142.667	119.429	149.065	101.6	0.0665017	0.540319	11.8034	0.0554149
Pigv	44	82.5	139.875	141.364	191.75	147.364	123.167	147.909	126.5	122.5	117.6	163.2	0.0666281	0.540319	11.7981	0.226886
Pmm2	118.375	157.639	111.375	138.75	132.256	126.132	131	128.389	143.971	160.882	114.55	161.923	0.0666249	0.540319	11.7982	0.0564508
Tbc1d22b	201.222	154.818	107	150.235	97.7	133.353	131	118.65	161.125	131.6	139.769	113	0.0666488	0.540319	11.7972	0.15321
Med14	167.25	150.75	112.294	105.4	94	228.4	136.533	129.333	150.455	149.333	178.8	114	0.0667873	0.540851	11.7914	0.199854
H2-DMa	130.5	103.375	90.1667	100.562	123.556	92	150.222	102.071	227.333	114.333	121.7	27	0.0671801	0.542794	11.775	0.165845
Ppox	100.727	122.118	146.286	183.467	194.6	221	178.875	170.267	208.6	185.048	166.267	139.75	0.0672004	0.542794	11.7742	0.16129
Vat1	111.434	109.924	109.951	106.811	113.826	112.834	106.809	104.072	108.937	112.523	111.783	110.332	0.0671606	0.542794	11.7758	0.00453615
Col1a1	110	144	102.286	143.167	165.571	135.143	124.576	116.294	116.857	126.222	150.167	107	0.0673838	0.543809	11.7666	0.22628
2610507B11Rik	105.813	112.485	119.286	112.553	100.669	116.419	98.6701	91.9821	106.504	109.047	99.8021	92.7246	0.0677899	0.544606	11.7498	0.0142249
Atp1a3	127.432	116.143	132.46	129.612	116.674	124.281	118.261	115.78	135.149	141.311	107.304	143.793	0.0676256	0.544606	11.7565	0.041251
Nmral1	72.25	136.833	153.364	87.125	127.444	138.444	138.429	154.625	142.778	138.643	117.154	132.333	0.0678179	0.544606	11.7486	0.158765
Ripor1	152.143	94.3333	117.25	136.944	143.45	120.3	93.2308	142.895	125.188	127.091	137.765	164.833	0.067583	0.544606	11.7583	0.103143
Slco3a1	130	197.833	136.333	56.7778	122.1	111.154	110.75	127.429	137.25	110.615	104.538	130.375	0.0678297	0.544606	11.7481	0.195802
Ttc14	256.357	251.452	146.867	207.778	246.368	285.944	183.556	221.133	218.917	140.167	183.75	106.2	0.0677929	0.544606	11.7496	0.118683
Cab39	105.202	118.279	118.426	116.742	106.042	117.98	112.109	113.1	107.165	116.103	114.575	107.141	0.0679781	0.544867	11.742	0.0127354
Hnrnpa1	104.673	119.867	108.465	109.046	115.493	116.574	110.587	104.989	110.469	111.788	110.329	103.578	0.0679701	0.544867	11.7423	0.0165152
Alkbh4	95.1429	122.6	104	62.5	156	158	159.875	105.25	107.9	119.2	134.625	125.667	0.0680503	0.544982	11.739	0.273001
Atp8a1	93.2727	123.619	152.167	141.742	171.533	159.452	134.667	181.846	137.636	142.905	131.44	121.917	0.0681923	0.545654	11.7332	0.0869126
Crcp	111.143	135.69	121.933	109.632	91.125	106.222	109.806	106.591	113.357	112.818	122	82.8	0.0683321	0.545845	11.7275	0.0831736
Rnf149	118.725	119.327	107.239	115.558	106.905	113.965	114.956	128.82	99.23	119.575	112.888	114.277	0.068295	0.545845	11.729	0.00983151
Coq8b	132.6	183	163.143	99.2105	122	126.286	108.267	134	117.286	121.733	135.889	86.7778	0.0685142	0.54653	11.72	0.160548
Psd3	103.125	108.438	141.125	165.25	64.5	24.5	132.818	136.182	164.857	173.9	107.75	120.8	0.0687083	0.54653	11.7121	0.272375
Pwwp2b	90.9143	119.571	149.206	115.263	100.533	103.92	104.685	93.9643	109.588	101.087	133.316	107.857	0.0686255	0.54653	11.7155	0.064019
Tbrg1	89.7292	117.289	129.419	113.806	105.253	114.124	104.15	92.7925	97.4925	112.413	111.546	88.2571	0.0686584	0.54653	11.7141	0.0245579
Trim8	113.672	102.584	101.174	97.631	96.7222	92.2235	100.398	88.4286	108.043	112.284	107.656	112.542	0.0686967	0.54653	11.7126	0.0249735
0610012G03Rik	127.308	114.617	110.542	111.29	117.015	117.061	110.946	109.953	111.505	103.595	111.679	102.661	0.0688199	0.546955	11.7076	0.0159939
Aldh3b1	110.644	92.4133	118.461	110.904	95.7206	95.6212	100.208	95.6515	114.1	119.569	109.821	87.1562	0.0693781	0.548486	11.6849	0.0288517
Anapc16	105.878	131.86	125.933	140.14	133.618	131.341	123.388	122.525	122.178	134.25	123.912	121.679	0.069394	0.548486	11.6843	0.0469249
Capza1	109.333	137.585	113.123	122.047	117.807	108.726	117.007	114.63	115.543	103.825	127.455	108.149	0.0696404	0.548486	11.6744	0.011986
Enpp1	138.333	80	88.4444	91.8	114.333	50	137.143	108.833	82.6154	126.75	66.6667	134.7	0.0692776	0.548486	11.689	0.220547
Gm9844	84.1833	90.1234	87.1111	74.1862	81.4174	83.4471	76.0588	76.117	89.6222	85.1259	81.3607	73.9032	0.0695922	0.548486	11.6763	0.0163763
Ly96	102.333	116.564	107.083	119.083	130.209	96.0833	123.256	130	109.467	102.76	101.2	85.84	0.069425	0.548486	11.683	0.0501418
Pam	121.476	126.778	133.706	134.433	147.406	124.478	145.947	168.25	146.235	140.593	130.905	120.625	0.0690756	0.548486	11.6972	0.0635716
Plaat3	116.943	129.204	113	103.756	122.541	89.0541	107.743	99.6596	105.857	115.036	99.2857	81.5294	0.0696536	0.548486	11.6738	0.0492567
Rftn2	133	343.5	58	96	56	136.714	112	59.5714	122.667	91.5		58	0.0695367	0.548486	11.6785	0.486606
Smdt1	103.686	105.873	105.015	99.0193	109.04	96.5654	103.731	107.558	101.889	103.599	105.974	105.767	0.0695469	0.548486	11.6781	0.00913781
Zfand6	142.267	149.363	137.683	160.535	137.814	131.412	116.886	123.292	164.079	147.254	113.785	120.029	0.0693079	0.548486	11.6878	0.0259728
Ccl6	103.555	106.002	104.091	108.138	101.892	102.995	97.4444	108.182	107.386	108.242	108.376	99.7624	0.0703882	0.549095	11.6444	0.00526182
Cpsf6	112.455	150.708	127.024	192.946	148.786	138.405	127.208	132.915	152.829	130	135.774	162.6	0.0699662	0.549095	11.6613	0.0481871
Dnajc14	104	111.644	122.698	119.812	95.7288	108.93	94.68	100.047	112.514	105.309	104.333	85.0667	0.0701787	0.549095	11.6528	0.0399068
Dock2	124.091	131.77	115.891	123.978	115.116	120.743	103.356	103.912	100.276	118.735	112.845	90.8485	0.0702989	0.549095	11.648	0.0243681
Emilin2	109.272	107.77	126.286	111.864	123.073	127.031	110.929	105.608	109.045	116.424	118.941	141.792	0.0707796	0.549095	11.6289	0.0251707
Fam193b	176.5	229.444	264	217.125	125.556	246.143	211.867	252	235.6	231.667	233.143	294.5	0.0708639	0.549095	11.6255	0.187508
Fblim1	118.611	107.191	132.782	111.3	99.7021	103.806	110.75	108.5	57	144.842	141.071	98.25	0.0700577	0.549095	11.6576	0.0316783
Fuca1	99.5024	102.817	109.107	112.838	112.862	102.795	101.223	95.306	101.052	96.7623	97.9419	97.625	0.0707316	0.549095	11.6308	0.00805454
Mcur1	132.923	112.694	89	131	122.6	120.775	106.229	137.067	134.2	126.63	117.235	97.4706	0.070898	0.549095	11.6242	0.0466834
Med23	106.333	196.591	174.857	156.867	121.375	109.545	141.5	145.714	130.444	130.333	103.7	182.833	0.0701337	0.549095	11.6546	0.151358
Mfsd11	120.865	114.766	130.684	130.458	126.34	129.848	116.695	111.211	133.477	106.127	117.6	97.2759	0.0704551	0.549095	11.6418	0.0157109
Mtmr3	124.704	107.619	137.316	137.48	116.295	89.7714	119.732	139.583	100.429	124.22	131.578	124.8	0.0707092	0.549095	11.6316	0.0538502
Ndfip1	117.021	116.421	106.716	109	107.757	107.852	108.28	106.544	120.134	113.99	110.906	114.487	0.0702031	0.549095	11.6518	0.00880711
Pick1	167.333	80.6667	150.167	183.286	122	181.4	102.4	156.818	147.2	134	182.5	173	0.0706487	0.549095	11.634	0.314434
Rpap3	87.625	123.833	106.5	177.154	90	95.1818	149.714	92.5714	132.889	74.4286	101.909		0.0706529	0.549095	11.6339	0.228115
Tcp1	107.125	112.522	115.373	97.3672	109.183	104.659	110.167	117.404	102.169	98.0859	105.379	100.613	0.0708072	0.549095	11.6278	0.0142497
Tmem260	124.667	122.5	152.062	101.256	109.818	160.75	108.16	119.615	180.375	124.333	97.5417	131.583	0.0702853	0.549095	11.6485	0.08892
Wdr18	130	140.189	101.93	100.791	101.244	108.622	92.8679	90.8444	94.2051	117.762	104.325	90.05	0.070639	0.549095	11.6344	0.0499332
Zbtb34	192.833	198.444	250.75	236.75	150.647	157	143.923	141.75	165.125	183.7	158	175.6	0.0703658	0.549095	11.6453	0.200781
Zer1	262.111	125.5	158.5	138	119.6	132.111	183.7	112.8	156.5	222.846	196.429	110	0.0701243	0.549095	11.6549	0.164154
Mrpl57	104.661	119.675	104.079	119.022	100.241	109.017	96.3131	107.472	110.593	97.9722	90.9348	112.944	0.0710792	0.549204	11.617	0.030411
Rab28	98.2857	107	88.3	154.263	86.1364	104.188	134.381	124.143	115.263	116.357	124.812	115.875	0.0710331	0.549204	11.6188	0.0726176
Ubxn1	100.773	113.457	93.5044	96.1534	97.6115	104.504	96.8833	100.801	103.473	103.099	103.261	89.5634	0.0710872	0.549204	11.6167	0.0134608
Cd44	98.6173	109.625	112.855	117.344	111.382	112.562	93.6963	104.653	108.934	112.229	106.498	111.69	0.07155	0.55074	11.5985	0.00619245
Depdc5	199.571	163.25	59.8	102.4	143.333	168	127	196		182.429	214.5	104	0.0716957	0.55074	11.5927	0.37396
Ercc5	154.625	183.556	158.5	191.7	81.5556	133	74.7143	112.4	185.5	117.455	147.667	202.2	0.0716607	0.55074	11.5941	0.263503
Mis18a	207.083	117.9	160	117.773	152.714	164.429	132.371	157.789	136.667	97.6364	109.762	121	0.0714978	0.55074	11.6005	0.130343
Nutf2-ps1	131.286	117.833	105.067	107.472	105.167	95.6216	90.8333	108.615	116.077	103.846	99.3333	92.625	0.0715399	0.55074	11.5989	0.0454857
Paxip1	109.7	209.882	120.111	182.833	217.375	195.273	131	151.545	164.25	148.6	149.6	186	0.071417	0.55074	11.6037	0.184185
Reps1	130.417	152	168.889	111.333	97.3	163.833	103.524	114.143	156.917	144.7	146.727	134.5	0.0716388	0.55074	11.595	0.124677
Tmem9	88.85	94.28	139.077	110.9	85.4444	109.632	98.6	77.5455	90.7727	91.1	103.6	110	0.0718232	0.551269	11.5878	0.0912422
Tmem64	136.478	102	141.583	82.0769	72.4444	108	130.895	131.812	131.929	128.55	100.5	62.5	0.0719106	0.551491	11.5843	0.144804
Ogfod1	90.25	158.875	119.3	168.091	142.273	168.357	116.111	150.273	118.9	114.5	146.182	54.4	0.0720267	0.551931	11.5798	0.167823
Brcc3	131.286	122.37	109.042	87.8519	114.104	87.6667	104.545	123.765	104.88	106.948	105.043	105.471	0.0724073	0.553039	11.565	0.0760855
Cdc37	128.198	122.048	105.228	115.874	106.833	106.103	113.98	113.218	111.569	102.276	106.361	89.0606	0.0722593	0.553039	11.5707	0.0145544
Slc9a3r1	101.818	101.779	117.833	110.779	116.172	120	113.626	103.202	111.577	113.716	111.5	115.708	0.0724651	0.553039	11.5627	0.0208338
Wdtc1	111.167	89.7838	110.5	120.088	83.2609	121.5	148.316	110.045	93.95	121.185	138.429	98.2857	0.0722949	0.553039	11.5694	0.0809046
Ypel5	133.037	133.215	116.186	133.113	118.852	138.118	126.331	127.045	111.34	123.214	125.315	110.485	0.0724035	0.553039	11.5651	0.0163812
Srp54a	108.96	101.944	113.87	110.092	120.34	133.589	104.436	111.774	111.193	117.709	124.152	93.6818	0.0725661	0.553361	11.5588	0.0350268
Serinc5	114	155	66.75	213.4	109.5	98.75	261.2	133.25	206.8	100.667	66.1111	179	0.0727009	0.55394	11.5536	0.38512
Lrrc14	120.118	108.909	130.9	119.471	103.071	190.615	125.846	132.583	137.81	113.067	98.375	174.429	0.0728548	0.554215	11.5477	0.106923
Sat1	138.373	135.672	142.409	147.212	136.08	136.075	134.761	137.307	137.387	141.568	135.273	124.943	0.0728367	0.554215	11.5484	0.00413623
Ctdsp1	95.7432	92.0175	99.4225	113.848	104.398	116.123	107.536	94.8	116.295	102.835	105.078	95.9571	0.0731007	0.555636	11.5382	0.016943
Psmc1	115.71	123.384	103.402	115.414	103.246	131.447	109.013	114.649	98.9561	105.13	101.073	110.209	0.0731674	0.555694	11.5356	0.0155257
BC031181	116.866	125.17	119.792	125.597	119.592	106.271	119.248	124.315	105.951	111.16	118.281	120.942	0.0735785	0.558366	11.5199	0.0139297
Gm4724	112.5	136.333	147	133.429	168.833	147.833	185.5	123.857	137.6	120	110.286	99	0.0738212	0.559757	11.5106	0.295143
Psmb6	93.8627	97.6295	88.1835	94.6333	94.5548	85.9967	88.1473	96.7298	82.4767	85.142	90.157	81.9728	0.0739772	0.560487	11.5046	0.00650347
Asb8	83.4286	112.933	101.542	135.036	109.222	75.1667	129.56	95.7727	102.632	115.391	97.9412	99	0.0741591	0.560529	11.4977	0.0737033
Atpif1	103.685	111.173	111.405	110.98	108.305	116.93	111.147	114.22	106.59	108.545	110.503	113.012	0.0742206	0.560529	11.4954	0.00496132
Pafah1b3	105.182	120.25	113	107.286	69.3333	95.3333	93.5556	83.4	109.667	99.6923	109.083	80.125	0.074221	0.560529	11.4954	0.127726
Wdr26	120.723	115.518	106.082	123.927	141.85	128.7	112.395	133.08	112.039	127.92	112.616	113.733	0.0741706	0.560529	11.4973	0.0158583
Tmem35b	122.769	92.875	146	124.667	145.435	158.923	114.684	129.565	126.273	122.316	127.05	114.667	0.0743509	0.56106	11.4904	0.110485
Mlx	119.647	125.538	105.515	116.714	118.161	78.1613	120.593	125.941	89.875	97.1852	113.08	110.923	0.0747691	0.562861	11.4746	0.0641041
Rps2	95.4408	99.1921	95.2195	93.3634	102.235	100.326	94.4752	93.1188	91.5693	95.007	93.195	93.9574	0.0746739	0.562861	11.4782	0.00487398
Sec24c	153.036	114.583	95.5122	119.686	120.377	133.404	116.364	141.611	129.667	129.044	108.158	114.037	0.0747401	0.562861	11.4757	0.0398463
Napg	137	140.689	114.486	132.972	158.476	128.615	150.344	149.649	155.49	131.69	148.45	128.565	0.0749378	0.563027	11.4683	0.0494323
Nr1d2	160.045	154.833	152.444	117.091	134.545	100.452	133.792	155.581	148.567	146.675	133.929	145.643	0.0748786	0.563027	11.4705	0.0567847
Tmem41a	128.062	123.294	121.25	74	107.429	120.2	138.619	143.905	101.308	127.636	105.625	172.333	0.0749706	0.563027	11.4671	0.150882
Cyb5a	117.672	119.654	132.06	118.335	127.016	125.423	121.945	125.169	123.329	118.791	122.296	115.657	0.075292	0.564288	11.455	0.0121474
Rnf187	103.033	106.432	109.203	119.167	121.623	116.49	96.3793	96.25	104.601	100.207	117.673	112.333	0.0752223	0.564288	11.4576	0.0122804
Tnrc6b	97.1	126.429	137.909	157.353	175.167	134.385	166.5	137.5	108.8	103.682	113.824	126.667	0.0753184	0.564288	11.454	0.138
9430038I01Rik	115.091	132.056	120.286	109.1	101.889	68.3636	131	140.938	96.6923	103.75	128.636	118.4	0.0759311	0.564881	11.4311	0.161002
Akr1c12	126.889	88.3333	98.75	121.357	67.3846	74.1818	95.05	92.7333	77.3	94	133.083	71.6667	0.0768569	0.564881	11.3969	0.146114
Ccdc34	82.8571	124.429	108.889	142.909	60.2857	112.444	96.9286	121.933	133.125	74.2	167.8	117.6	0.0764703	0.564881	11.4112	0.219446
Ctr9	138.615	154	140.933	88.5833	95.25	141.308	115.25	92	120.75	114.091	123.8	104.5	0.0758304	0.564881	11.4349	0.132964
Dcaf15	119.636	110.96	121.417	137.316	111.643	189.167	102.733	147.368	118.417	140	142	44.5	0.0766225	0.564881	11.4056	0.115208
Dusp9	185	105.5	105	169.4	80	40	134.2	92.1667	149	125.75	118	37	0.0765406	0.564881	11.4086	0.600451
Ecpas	141.4	134.776	106.333	147.162	108.279	134.525	122.39	113.667	121.417	118.622	86.7241	100.917	0.0763897	0.564881	11.4141	0.0475589
Gabarapl2	128.376	125.497	108.067	116.331	119.64	115.85	116.314	116.564	119.093	111.772	111.992	116.875	0.0760502	0.564881	11.4267	0.0159591
Gpd1l	119.81	108.125	124.85	96.32	126.906	78.9545	119.958	135.56	125.25	104.931	106.724	133	0.0761935	0.564881	11.4214	0.0782288
Hyou1	106.486	126.278	136.233	113.612	95.8286	129.114	102.902	119.517	137.942	115.714	113.957	117.6	0.0759778	0.564881	11.4294	0.0351674
Ift172	193.8	159	215.25	108	114.938	186.5	119.067	191.9	121	180.5	138.526	114.286	0.0767825	0.564881	11.3997	0.219224
Kdm7a	99.1	130.696	100.87	129.238	153.25	141.407	127.81	130.833	65	130.034	138.333	117.636	0.0768982	0.564881	11.3954	0.078589
Lair1	144.565	121.897	138.754	119.09	124.303	124.897	123.9	127.319	132.4	120.026	107.806	108.731	0.075519	0.564881	11.4465	0.0166132
Nfia	262.5	24	22	157.167	66	49	105.333	203	262	53.5	53.3333	184	0.0755827	0.564881	11.4441	0.572206
Pank3	144.136	112.531	100.138	132.094	142.591	162.182	110.886	119.241	89.6538	117.267	120.5	122	0.0762128	0.564881	11.4207	0.0624081
Ppp2r2a	84.56	119.5	101.909	110	122.983	91.1207	108.093	107.571	119.78	98.4651	113.478	110.615	0.0764541	0.564881	11.4118	0.0380392
Ptdss1	102.306	106.596	83.7778	116.1	123.25	100.297	101.268	118.405	103.679	113.367	117.947	98.0667	0.076871	0.564881	11.3964	0.0425239
Selenoh	106.41	131.6	111.038	118.932	134.536	143.727	124.781	142.159	130.189	113.579	134.682	88.5	0.0768404	0.564881	11.3975	0.0527663
Slc15a4	114.37	140.378	114.735	99.9474	119.519	107.289	115.049	124.138	124.878	96.9434	103.817	86.3333	0.0768617	0.564881	11.3967	0.0317458
Stx2	120.667	122.162	103.409	91.6786	108.241	148.4	102.647	112.385	123.034	152.167	112.286	147.8	0.0766486	0.564881	11.4046	0.0678845
Ugt1a7c	102.446	97.9708	103.014	108.721	119.564	122.902	96.3667	98.018	110.113	98.549	102.632	102.295	0.0757317	0.564881	11.4386	0.0190009
Usp48	151.154	147.237	145.188	198.075	146	151.5	163.788	144.429	155.25	183.303	152.147	148.786	0.0763647	0.564881	11.4151	0.0597647
Wdr83os	104.159	122.319	120.517	114.531	134.952	123.308	124.656	123.298	112.591	125.723	114.712	111.9	0.0757927	0.564881	11.4363	0.030335
Xpr1	99.3514	119.091	120.5	119.433	100.98	89.8571	119.194	86.5	112.5	129.905	102.659	120.867	0.0758451	0.564881	11.4343	0.0386295
Xrn1	107.889	138.25	109.571	157.481	125.364	110.875	124.211	151	121.833	140.071	154.765	152.667	0.0757519	0.564881	11.4378	0.108932
Acaa1a	112	105.795	113	110.183	126.414	132.766	100.463	101.877	122.86	105.525	106.014	114.763	0.0770797	0.565331	11.3887	0.0237265
Higd2a	98.3929	104.415	89.0303	124.702	109.375	105.565	86.1923	102.859	114.524	109.631	109.351	98.6216	0.077051	0.565331	11.3898	0.024547
Flvcr1	139.571	129.167	149.26	116.754	124.25	167.62	134.391	120.186	135.116	122.923	124	128.85	0.077486	0.567527	11.3739	0.0335513
Ifit3	129.375	118.024	112.665	107.687	109.398	109.898	106.5	110.381	114.842	102.622	108.348	96.3319	0.0774997	0.567527	11.3734	0.00232347
Agap1	122	135.703	114.893	133.353	82.4	121.615	121.185	138.857	118.35	84.0714	96.35	101	0.0780617	0.569157	11.353	0.0847235
Efemp2	139.25	89.5556	128	120.292	133.286	109.417	93.2727	117.333	96.0833	91.8	91.5385	63	0.0781014	0.569157	11.3515	0.135137
Itgb5	121.326	107.384	109.786	102.223	107.2	114.758	107.661	105.28	104.2	106.431	99.1698	98.2927	0.0777829	0.569157	11.3631	0.0118119
Mdh1	113.398	125.561	125.059	111.551	116.22	113.408	112.989	115.407	127.875	103.605	116.933	101.7	0.0780266	0.569157	11.3542	0.0123415
Med28	99.2794	109.071	110.879	97.1348	105.533	95.6538	96.9375	106.753	96.253	102.174	96.7231	100.727	0.0779515	0.569157	11.3569	0.0211489
Setdb2	206.333	78.6667	151.4	106.6	121.812	51	134.6	161.5	157	166.056	119	138	0.0781457	0.569157	11.3499	0.298682
Tjp2	137.667	110.154	104.571	158	83.5	48.8333	136.222	142.5	103.333	182.5	200	205.5	0.0778496	0.569157	11.3606	0.277089
Armc2	27.3333	142.333	149.5	90.8	235.25	200.5	166	97.5	196	197	132	278	0.0782595	0.569545	11.3458	0.630322
Galnt12	72.5	184.833	155.727	78.3846	146.812	140.571	133.696	175.364	118.4	141.1	86.9167	134.75	0.0783303	0.56962	11.3432	0.174511
Cfap45	134.5	193.833	126	127	82.25	156.333	48.25	100.667	49	123.667	250	216	0.0785462	0.570542	11.3354	0.492845
Crtc1	98.6667	182.444	156.667	166	114.364	72.3333	134.091	161.6	109.75	107	64	109.667	0.0785784	0.570542	11.3343	0.246397
Rabgap1l	205.75	176.111	36.5	140.818	122.643	86	133.857	151.857	114	208	125.909	126.5	0.0787835	0.570772	11.3269	0.353966
Sesn1	141.915	140.745	137.195	138.857	110.863	134.662	139.116	123.154	139.667	120.963	132.6	121.135	0.078792	0.570772	11.3266	0.0258009
Tmem131	97.0263	109.705	93.1429	114.953	137.333	122.204	99.0465	138.909	139.933	128.441	115.216	115.421	0.0787649	0.570772	11.3276	0.0424254
Mbnl1	133.9	139.18	142.36	137.069	160.273	144.156	119.478	127.961	138.59	131.187	146.709	140.185	0.0790092	0.571905	11.3188	0.0103368
Sh3glb1	109.833	107.803	102.197	110.697	98.991	105.639	106.455	110.054	92.9957	106.805	104.672	99.1824	0.0792115	0.572929	11.3116	0.00583973
Guk1	105.237	103.844	120.447	119.389	120.389	131.349	106.356	104.243	123.115	103.518	110.462	113.111	0.0793873	0.573759	11.3053	0.0398073
Emp3	99.0633	100.323	105.967	102.778	102.372	107.345	94	100.353	98.3689	97.1008	98.2759	94.5041	0.0797668	0.576059	11.2918	0.00309703
Dhx9	157.917	118.88	116.333	155.706	151.821	169.13	110.214	129.917	135.842	111.2	104.833	157.889	0.0798538	0.576246	11.2887	0.0823991
Lyplal1	171.8	122.667	132.909	90	77.25	159.5	119.895	101.333	113.333	117.667	98	149.5	0.0799506	0.576396	11.2852	0.268696
Sntb2	81	120.389	148.917	165.471	143.261	101.704	184.917	137.4	116.842	153.875	155.394	138.417	0.0799972	0.576396	11.2836	0.0998548
Sfr1	94.5862	93.165	118.128	108.149	117.258	112.603	91.8235	101.797	97.4	104.09	96.4528	104.606	0.0802407	0.577267	11.275	0.0305555
Uba6	98.3636	131.056	112.824	151.632	134.312	113.526	119.857	152.316	115.045	108.833	94.4118	106.75	0.0802054	0.577267	11.2762	0.12125
Kdelr2	128.738	102.014	97.8462	116.596	107.692	129.889	100.508	93.8657	116.288	100	106.312	99	0.0803064	0.577298	11.2727	0.0348999
Csf3r	203.75	89	157.273	112.778	121.667	100.242	141.75	132.222	116.833	138.273	138.515	135.143	0.080382	0.577401	11.27	0.069141
Aacs	120.684	121.229	106.783	99.5294	96.5714	146.889	108.524	106.469	93.4286	118.423	108.364	142.9	0.0806635	0.578719	11.2601	0.086616
H2-M3	143.645	144.156	150.333	142.365	121.174	122.714	122.789	115.5	142.406	130.77	119.189	139.562	0.0806886	0.578719	11.2592	0.0307628
Col1a2	156.333	137.478	141.882	80.3333	161.25	158	141.185	119.704	114.1	111.706	136.4	114.455	0.0808114	0.578898	11.2549	0.165513
Fnta	96.5152	97.5918	129.086	112.897	136.446	129.676	100.742	107.522	111.71	133.971	109.519	114.55	0.0809674	0.578898	11.2494	0.0421326
Pdcd6	138.55	134.252	127.814	110.518	126.61	133.573	114.164	125.308	113.746	123.959	114.101	112.656	0.0810211	0.578898	11.2475	0.0170935
Psmg3	107.286	134.436	91.2273	126.857	122.111	88.25	110	130.08	124.056	103.667	142.917	93.2857	0.0809659	0.578898	11.2495	0.0945333
Slc20a1	117.408	140.106	140.889	135.172	163.16	149.696	134.984	133.357	133.966	143.242	141.56	182.846	0.0809678	0.578898	11.2494	0.0462938
Ccser2	141.818	168.357	124.625	91.3846	79.9474	143	101.286	114.286	34.8333	98.5714	144.667	125.5	0.0811089	0.579086	11.2444	0.149926
Jade2	90.0263	104.509	111.762	126.808	116.742	109.574	108.34	112.875	106.86	122.143	100.681	106.37	0.0811894	0.579221	11.2416	0.0383674
Ccs	88.4167	160.773	129.838	131.647	136.323	94.6522	108.303	128.31	108.357	107.033	100.933	96.5882	0.0815629	0.579634	11.2286	0.0660506
Nmnat3	157.833	186.857	98.8	116.364	155.25	62.8333	68.5	121.625	114	88	116.833	149.857	0.081581	0.579634	11.228	0.320799
Nsdhl	133.846	125	88.9231	106.786	80.1111	112.267	133.286	112.259	116.8	87.2	76.4545	147.143	0.0814752	0.579634	11.2317	0.126198
Oas1c	178	161	131.111	132.737	148.933	104.923	61.4444	72.7143	101	137.16	117.143	169.5	0.0816169	0.579634	11.2267	0.184045
Prps2	124.714	93.1277	116.308	124.811	104.286	107	116.239	85.617	115.5	108.371	85.1034	96.125	0.0815164	0.579634	11.2302	0.0578878
Zfp397	88.3	159	107.167	120.692	214	130.444	173.842	167.1	231	167.667	135.769	184.6	0.0816123	0.579634	11.2269	0.129045
Eif6	100.256	106.768	97.3294	119.398	98.1458	106.545	104.351	96.84	89.519	93.6436	113.902	97.2586	0.0818595	0.580099	11.2183	0.0167437
Psmd7	130.212	114.84	112.814	130.08	102.417	112.413	107.465	117.402	116.71	100.493	118.939	123.8	0.0818375	0.580099	11.2191	0.0235695
Zfp958	132.727	111.8	176.364	160.643	146.714	123.643	144.857	140.2	103.25	143.571	70	128.286	0.0818674	0.580099	11.218	0.200322
AW209491	143.909	90.2308	121.8	152.3	67.3846	124.364	130.357	89	69.125	69.3333	132	115.75	0.082327	0.581095	11.2021	0.17234
Bub3	123.914	110.588	120.236	89.6458	117.537	123.967	113.28	118.785	117.167	90.0704	105.456	105.676	0.0822115	0.581095	11.2061	0.0294124
Ctbs	150.773	149.143	123.762	94.5455	127.355	118.806	133.192	173.389	127.682	134.321	136.259	116.286	0.0824106	0.581095	11.1992	0.0736792
Eci1	109.929	98.3103	87.9091	71.2069	109.63	109.194	109.143	97.1538	135.278	114.25	96.8095	119.167	0.0825335	0.581095	11.195	0.0741391
Mllt10	178.364	171.7	76.75	195	176.5	169.333	174.538	135.923	167.444	161.375	173.222	168	0.0824451	0.581095	11.198	0.215347
Pde1b	291.278	282.425	278.875	278.043	256.222	237.455	257.36	259.619	275.8	259.077	265.913	294.5	0.0825637	0.581095	11.194	0.0761494
Pkn1	142.016	126.67	135.151	109.36	121.189	130.351	115.711	125.1	115.363	128.651	126.562	120.649	0.0821862	0.581095	11.207	0.0186472
Plekha2	103.738	119.142	96.1733	107.962	107.242	101.373	111.977	116.606	113.721	106.436	106.136	105.286	0.0825371	0.581095	11.1949	0.0210826
Xpc	143.556	117.235	99.0909	69.5	163.667	102.625	130.294	142.083	104.867	135.667	106.095	174.125	0.0822243	0.581095	11.2057	0.147443
Polr1a	157.5	149.882	101.579	98.3077	131.077	116.167	106.111	99.4545	129	94.3636	109.125	138.286	0.0826355	0.581166	11.1915	0.128638
Clcc1	155.684	144.161	101.588	90.8462	132.235	127	102.122	118.833	138.556	102.5	103.875	63.2727	0.0830057	0.582898	11.1788	0.0804229
Trim39	156.5	91.1	241.75	217.667	184.545	193.714	143.286	195.25	189.75	188.2	163.714	113	0.0829602	0.582898	11.1803	0.272691
Sema4d	112.045	134.725	127.562	124.961	129.816	114.233	128.026	131.204	115.593	123.637	123.566	120.845	0.0830746	0.582947	11.1764	0.00991697
1110038B12Rik	144.28	155.383	142.714	131.862	127.467	131.882	137.548	132.382	154.312	108.457	113.955	84.5	0.0839178	0.583625	11.1477	0.0523366
Ccdc93	145.615	148.737	171.45	141.947	113.958	117.562	123.2	129.357	137.208	89	145.8	113.636	0.0839538	0.583625	11.1465	0.0763457
Eif4a2	156.597	148.785	171.735	152.409	146.078	160.08	157.511	160.252	159.471	140.43	154.08	148.342	0.0832419	0.583625	11.1707	0.0108243
Gbp3	73	131.692	143.464	127.692	115.957	120.917	99.4	121.875	138.481	113.42	106.623	90.4857	0.0836795	0.583625	11.1558	0.0368178
Gbp7	41.25	167.8	116.952	152.986	124.615	139.286	74.4	122.75	183.636	132.521	95.5957	151.364	0.0835075	0.583625	11.1616	0.0575342
Ghitm	132.173	128.378	128.457	115.023	126.156	120.145	127.444	135.731	115.616	131.777	119.555	116.481	0.0839499	0.583625	11.1466	0.0079505
Gm4540	101.25	82.6667	14	75.25	49.6	105.333	48	61.7143	72.5	124	89.5	45.75	0.083456	0.583625	11.1634	0.310094
Ipo13	127.19	131.107	149.615	127.031	133.629	97.5769	110.05	173.75	103.935	134.261	129.55	88.9167	0.0839775	0.583625	11.1457	0.0679614
Ncaph	203.6	144.7	137.625	208.5	85.5	158.75	132.846	135.19	132.8	123.333	117.2	63	0.0837689	0.583625	11.1527	0.278819
Rps28	74.8168	75.8447	74.7179	72.7151	72.4562	76.3451	73.6715	75.0581	73.2749	72.696	67.3097	73.5247	0.0838702	0.583625	11.1493	0.00164906
Thap12	111	136.105	84.4091	116.087	132.583	111.562	112.619	136.867	110.714	128.889	127.692	89.4	0.0837419	0.583625	11.1537	0.0929472
Tob2	99.4286	110.182	105.429	143.316	142.625	103.611	113.667	109.194	134.316	95.6316	116.217	103.917	0.0838551	0.583625	11.1498	0.0832076
Zfp277	81.6842	113.591	123.071	112.773	110.294	52.875	98.6667	119.188	152.75	82.8824	127.818	124.5	0.0837647	0.583625	11.1529	0.105216
Ndfip2	117.644	156.304	130.137	116.392	130.909	142.705	121.186	141.129	128.25	121.854	122.167	100.056	0.0840625	0.583785	11.1428	0.039654
Cacybp	92.1034	127.464	113.638	103.436	95.0962	108.696	107.458	117.269	113.221	113.471	102.871	106.289	0.0844056	0.58407	11.1312	0.0272823
Dgkz	124.146	139.141	118.577	150.346	154.488	140.884	126.738	109.993	132.701	124.194	133.625	125.088	0.0843648	0.58407	11.1326	0.0173946
Fastkd2	78.5714	200.143	163.857	140.455	71.4	109.444	124.357	120.714	110.462	145.364	87.5	119	0.084321	0.58407	11.134	0.227225
Nelfe	92.2581	96.4615	88.0571	113.864	84.3333	94.6452	100.23	96.9792	96.4865	95.5405	95.4815	87.2381	0.084414	0.58407	11.1309	0.0510592
Rfng	134.7	117.889	99.9286	100.25	79.1667	68.1111	98.5	94.6667	77.75	99.5385	124.714	67.5	0.0844027	0.58407	11.1313	0.154601
Cblb	141.704	144.261	125.4	141.629	102.75	97.5	106.375	137.214	119.945	126.963	109.837	110.19	0.0848344	0.585372	11.1168	0.0631634
Pogk	97.8	155.407	156.385	92.0714	130.5	102.571	107.19	98.8571	113.667	125	95.0833	103.6	0.0848505	0.585372	11.1162	0.124901
Rabgef1	108.043	95.4103	124.737	130.147	131.24	118	118.935	98.6364	112.815	125.28	132.19	121.435	0.0848509	0.585372	11.1162	0.0617567
Stk4	110.564	114.907	105.5	112.887	100.803	115.559	118.438	107.704	116.25	119.128	89.7455	109.419	0.0847895	0.585372	11.1183	0.0346363
Taf1b	124.6	80.125	113.125	151.727	100.857	75.8235	143.538	117.375	159.714	125.714	154	98.7143	0.085174	0.58674	11.1054	0.217752
Top3b	124.688	160.905	117.7	112.824	116.227	172.286	129.85	126	158.562	133.636	115.727	122	0.0851501	0.58674	11.1062	0.101891
Aagab	146.973	122.625	106.594	152.292	134.966	120.792	110	125.644	134.094	126.431	144.574	95.9412	0.0853945	0.58697	11.098	0.0376203
Atp5c1	111.873	104.221	110.081	102.363	105.335	114.712	106.861	102.415	102.658	103.709	100.018	110.091	0.085335	0.58697	11.1	0.00840908
Mccc1	82	103.636	152.091	128.182	80.2	156.333	86.3	150.5	134.143	102.75	112	37.25	0.0853354	0.58697	11.1	0.194736
Znhit1	110.873	117.422	126.494	110.907	122.4	108.109	117.802	117.794	116.207	114.23	108.442	117.378	0.085627	0.588139	11.0902	0.0204617
Adh5	110.565	111.706	96.2911	97.7188	112.721	89.3636	96.822	110.366	92.4253	95.625	98.4444	92.069	0.0858349	0.588707	11.0833	0.0220345
Mief2	148.667	141.818	81.5556	161.889	86.1429	165	137.857	149.889	115.545	96	128.846	135.25	0.0857899	0.588707	11.0848	0.226221
Arl1	98.025	102.14	111.182	108.372	113.441	89.0674	100.43	105.712	115.545	98.4904	98.8219	109.245	0.0859757	0.588908	11.0787	0.0175573
Trim32	117.25	157.857	107.7	115.417	96	67.3333	127.923	83.2222	115.667	87.2667	98.5	111.5	0.0859893	0.588908	11.0782	0.145766
Carhsp1	98.2857	105.392	103.929	130.759	115.192	96.4912	94.1268	94.4667	106.425	129.797	111.983	89.5294	0.0862865	0.590084	11.0684	0.0351377
Ube2g2	121.486	99.2817	102.293	102.304	118.302	137.234	110.765	103.204	101.569	120.42	101.442	115.08	0.0862446	0.590084	11.0697	0.0377807
Rab4b	100.233	135.032	126.967	141.23	122.159	135.648	116.781	111.623	113.464	115.597	144.22	113.409	0.0863908	0.590368	11.0649	0.0333281
Tspan5	152.4	102.125	105.727	148.4	122.4	93.4444	148	119.714	123.167	100.857	111	106	0.0864941	0.590646	11.0615	0.263369
Ccdc174	73.7778	117.4	83.1818	138.812	107.75	146.286	90.7143	82	143	86.125	98.2	102	0.0866068	0.590984	11.0578	0.14943
Prpf38b	146.211	196.265	146.048	212.1	188.674	158.643	171.31	183.882	170.5	161.476	174.08	159.176	0.0866692	0.590984	11.0557	0.0614207
Mrpl51	90.4286	113.228	104.014	85.971	94.4699	101.333	98.8318	105.62	97.8974	97.1765	96.7119	76.5789	0.0868129	0.591107	11.051	0.0243951
Ptpn6	133.432	128.515	125.25	118.109	118.471	103.122	127.371	121.815	127.378	118.734	118.375	115.922	0.0867624	0.591107	11.0527	0.012837
Fam174a	116.291	132.437	122.345	122.384	109.329	105.586	115.426	118.935	117.716	123.603	121.964	111.175	0.0872004	0.591707	11.0383	0.0214336
Kidins220	147.405	143.846	177.651	135.06	162.543	153.087	150.07	139.9	160.267	155.4	155.931	136.25	0.087015	0.591707	11.0444	0.0406043
Ovca2	74	141.833	105.056	102	107.333	144.111	103.2	104.043	138.579	107.947	145.583	112.667	0.0870863	0.591707	11.042	0.0935765
Prkrip1	98	108.609	122.909	102.882	100	123.429	105.154	126.69	108.462	95.1905	93.4615	111.867	0.0872154	0.591707	11.0378	0.0849061
Rrm2b	144.75	193	148.571	107.75	150.4	113.214	203.875	145.143	135.875	138.125	111	97.25	0.0871647	0.591707	11.0395	0.200717
Rhoq	98	132.97	127.606	108.788	121	138.156	126.362	122.902	93.3913	111	113.12	119.556	0.0878032	0.594837	11.0186	0.0487549
Spata2l	223.25	175	201	111.167	139.111	31	37.6	124	279.5	164.222	140		0.0877979	0.594837	11.0188	0.393528
Pin1	121.75	117.986	95.2727	124.65	138.939	116.735	107.767	113.079	118.741	118.674	127.653	116.889	0.0881141	0.596514	11.0085	0.0356262
Uhrf1bp1	156.111	181.857	129.167	205	177.316	119	151.158	165.286	138.857	163.077	102.462	165.75	0.0881953	0.596634	11.0059	0.0957032
Dusp12	123.5	112.067	149.471	99.7692	101.25	151.667	150.941	112.875	140.188	131.524	97.25	102	0.0882832	0.5968	11.003	0.139279
Uap1l1	95.1141	109.519	108.879	99.0078	106.278	107.397	96.9464	95.119	95.6516	98.2544	107.17	96.1215	0.0884827	0.597719	10.9966	0.00783789
5033406O09Rik	98.6	127.333	201	189.2	164.667	209.5	193	90					0.089064	0.597939	10.9778	0.406586
Abhd4	102.635	102.36	98.973	123.488	109.893	124.424	112.282	111.13	109.612	114.048	103.507	95.697	0.0889603	0.597939	10.9812	0.0297593
Acp2	123.267	141.624	126.694	132.345	119.637	125.41	117.533	122.165	120.481	130.578	120.762	110.438	0.0891437	0.597939	10.9753	0.0124295
Dop1b	157.35	175.562	124.19	139.105	114.176	159.353	134.2	100.286	159.208	164.476	136.042	151.714	0.0889305	0.597939	10.9821	0.0892855
Msrb1	123.986	116.535	110.435	113.233	108.984	111.354	118.185	121.583	115.508	117.681	110.468	115.906	0.088831	0.597939	10.9853	0.00881647
Ndufa10	95.7193	113.575	100.39	100.494	109.629	112.575	89.8409	111.53	92.6582	111.061	117.971	100.809	0.0887758	0.597939	10.9871	0.0236791
Parvb	140.904	127.595	120.375	111	148.459	117.811	118.865	114.238	123.353	120.063	145	123.467	0.0892143	0.597939	10.973	0.0347247
Phb	110.72	108.205	112.432	94.2405	101.791	98.2639	91.4286	109.53	93.234	98.4944	86.2292	101.825	0.0887266	0.597939	10.9887	0.0252034
Sars2	125	137.429	164	60.3333	70.1111	173	146.2	148.4	127.5	100	174	90	0.0891181	0.597939	10.9761	0.313603
St6galnac4	135.808	114.032	95.7391	120.484	126.484	110.958	104.5	123.949	125.939	106.977	107.581	111	0.0891734	0.597939	10.9743	0.0442513
Xbp1	102.345	109.566	114.484	95.25	103.344	111.931	109.65	109.903	117.514	92.9048	93.473	95.975	0.089205	0.597939	10.9733	0.0157889
Rb1	99.84	121.519	123.45	135.638	121	156.939	119.469	155.222	136.957	111.697	129.025	129.4	0.089283	0.597973	10.9708	0.0571396
Adra1a	91.5833	116.316	133.923	120.048	128.628	114.184	88.5	151.412	127.438	121.909	98.9268	113.267	0.0902765	0.598248	10.9391	0.0951227
Dexi	111.625	119.429	83.7143	91.5294	90	114.333	91.1667	120.778	130.875	97.1538	156.273	102.286	0.0902776	0.598248	10.9391	0.142066
Gng2	110.93	105.395	119.23	116.983	120.531	110.338	108.893	101.444	121.68	112.893	107.736	108.766	0.0897747	0.598248	10.9551	0.0128581
Gnl2	138.5	127.778	89.0625	93.3333	97.45	143.167	102.345	124	99.3333	120.615	169.909	87.3333	0.0902099	0.598248	10.9412	0.0935148
Idh2	112.451	102	130.727	122.381	99.7447	120.075	109.032	118.192	117.553	113.359	141.067	100.13	0.0898986	0.598248	10.9511	0.0337998
Lamtor1	107.282	106.333	104.097	113.352	103.034	108.743	101.886	106.765	113.45	117.741	109.512	105.905	0.0902437	0.598248	10.9402	0.00863469
Mrps34	97.4839	101.056	115.645	113.15	108.114	136.674	101.186	110.818	110.026	106.125	133.771	93.36	0.0901838	0.598248	10.9421	0.0523543
Napepld	195.4	130	199	116.5	113.75	121.333	126	99.75	89.4444	197.333	122	115	0.0898588	0.598248	10.9524	0.497836
Ndufaf3	108.071	101.804	100.941	91.9524	115.906	100.795	90.2	100.211	93.8824	121.026	108.962	79.1429	0.089776	0.598248	10.955	0.0429609
Nop14	102.591	148.167	108.92	103.35	127.308	99.52	105.25	107.852	96.48	125.056	124.045	96.4	0.0900882	0.598248	10.9451	0.0667384
Pm20d1	96.6667	210.667	108.5	130.429	112.5	117.667	147.2	78.5	173	170.5	119	79.3333	0.089915	0.598248	10.9506	0.185604
Tnfaip3	143.667	135.333	122	128.125	154.846	126.4	113.1	121.821	119.294	103.583	125.818	100.273	0.0898887	0.598248	10.9514	0.092029
Ttc9c	103.846	156.235	114.214	130.167	125.864	178.267	176.389	154.533	129.667	130.222	141.467	145.143	0.090196	0.598248	10.9417	0.0994697
Uqcc3	107.829	108.179	122.816	107.441	91.3729	102.982	97.8679	102.875	127.323	100.096	103.462	87.7727	0.0896487	0.598248	10.9591	0.0361687
Zfp654	105.125	136.778	87.1	128	94.75	150.182	144	94.3333	53	112.143	132.462	92.6667	0.0901107	0.598248	10.9444	0.206498
Mark3	180	166.29	177.227	126.577	208.385	151.857	136.844	121.65	142.462	163.143	170.167	185.385	0.0903929	0.598589	10.9354	0.0764715
Psmd3	105.825	108.129	107.556	108.149	97.4	111.64	103.516	115.541	128.098	113.09	112.849	127.853	0.0904819	0.598589	10.9326	0.0276076
Tmem230	131.531	136.902	117.439	120.323	112.358	115.227	138.148	127.695	115.886	117.636	126.653	107	0.0905198	0.598589	10.9314	0.0281737
Rpl9	115.818	128.083	119.779	124.14	121.288	122.834	114.01	122.359	118.082	119.715	121.4	117.659	0.0905928	0.598651	10.9291	0.00480822
Bclaf3	137.167	278.25	294	157	125	131.5	163.2	191	143.75	159	108.333	150.2	0.0906939	0.598659	10.9259	0.455246
Grcc10	113.171	98.3876	109.75	99.994	101.788	94.4395	98.9626	98.2337	104.965	95.9208	98.7814	93.9231	0.0907213	0.598659	10.925	0.0117221
Abitram	143.4	208.1	125	126.625	110.5	109.714	115.5	60.5	183.143	180.2		114	0.0917954	0.599511	10.8913	0.242028
Cep120	194.286	126.533	95.625	134.381	122.5	113.524	152.885	138.5	151.8	102.235	106.167	81.6667	0.0909863	0.599511	10.9167	0.0983484
Cntrl	213.429	231.818	225.375	183.267	126.818	170.2	165.667	77.8333	163.7	173.667	102.2	106.667	0.0921247	0.599511	10.881	0.18135
Cyb561d1	114.75	157.846	177.375	126	113.533	202.875	147.727	88.25	139.2	165.875	143.389	89.6	0.0919782	0.599511	10.8856	0.16747
Cyb5r1	130.636	130.684	119.919	122.785	115.71	123.9	119.843	131.982	114.915	114.972	132.507	134.818	0.0918766	0.599511	10.8887	0.0197618
Daam1	86.8333	150.364	195.667	82.7778	92.4	123.286	121.667	211.667	115.364	132.4	120.75	114.5	0.091272	0.599511	10.9077	0.232078
Dram1	246.143	160.35	100.556	125.778	220	55	155.667	134	79.7	86.5	111.4	101	0.0913959	0.599511	10.9038	0.209688
Fgd3	116.5	139.194	115	121.318	141.692	103.075	115.025	110.9	122.714	123.607	117.5	137.5	0.0918591	0.599511	10.8893	0.0655981
Gm15922	118.6	127.354	142.306	115.203	141.303	139.593	118.357	105.842	155.343	112.66	121.667	117.207	0.0910933	0.599511	10.9133	0.0366218
Insig1	123.209	120.277	112.136	140.113	137.07	93.2174	115.45	117.175	123.719	126.636	141.526	113	0.0917382	0.599511	10.8931	0.0280027
Jagn1	94.3704	128	112.3	94.8571	112.385	89.1905	139.861	121.974	107.167	93.7667	116.44	113.091	0.0915586	0.599511	10.8987	0.063735
Mrps30	107.091	99.7143	131.947	122.043	113.538	93.4839	106.688	104.263	90.3043	123.606	122	111.846	0.0917137	0.599511	10.8938	0.0707392
Mynn	118.429	132.688	108.091	174.071	132.875	78.5	126.5	132.5	134.25	131.909	125.812	102.875	0.0920449	0.599511	10.8835	0.155478
Parp11	192.25	148.444	114.36	114.25	136.65	141.382	188.5	67.75	111.9	147.025	120.047	145.556	0.0910649	0.599511	10.9142	0.0661466
Plin2	108.959	118.675	115.004	113.893	113.387	111.716	104.407	99.74	113.254	108.004	107.393	106.428	0.0920194	0.599511	10.8843	0.00155179
Pnpo	148.8	118.6	100.778	134.154	175.75	99.4	111.364	131.444	97.4545	103.857	113.2	62.75	0.0913911	0.599511	10.9039	0.145386
Rabgap1	142.81	142.267	121.5	96.5429	119.03	116.909	107.067	96.0741	132.833	155.071	91.5769	145.933	0.0921158	0.599511	10.8813	0.0621787
Slc26a11	162.824	158.5	144.5	182.731	143.917	155	147	167.367	151	140.474	153.667	143.2	0.0921072	0.599511	10.8815	0.0473111
Tnf	227.417	183	199.909	188.231	196.4	143.091	146.538	183.133	160.444	178.5	129.25	161	0.09205	0.599511	10.8833	0.0632752
Vps13a	171.6	127	67	99.8182	184.333	134.273	150.083	129.143	119.857	161.909	130.222	107.5	0.0915188	0.599511	10.8999	0.28684
Stom	107.836	110.511	129.669	116.523	114.724	114.513	105.974	116.403	120.485	120.44	111.868	114.82	0.0923885	0.600813	10.8728	0.00813831
Pbx1	29	78.5	44.5	171.714	70.6667	82.5	135.75	99	88	141	37.5	118	0.0924535	0.60082	10.8708	0.452949
A530017D24Rik	191.714	201.333	82.3333	86	140	172.6	116.583	150.667	157.818	91	131	249	0.0926951	0.600843	10.8633	0.231134
Exosc5	136.862	125.419	104.419	98.8929	133.023	110.711	126.451	115.023	102.651	115.923	118.522	100.864	0.0925338	0.600843	10.8683	0.0527586
Luc7l3	172.714	169.022	233.32	228.972	194	151.524	152.03	227.346	197.125	196.235	196.536	179.684	0.0926818	0.600843	10.8637	0.0571773
Parn	125.143	76.0667	100.667	130.8	92	119.25	105.176	121.75	111	104	74	123	0.0927124	0.600843	10.8627	0.124859
Clptm1l	110.624	124.642	109.673	106.331	102.268	119.352	124.296	113.324	126.4	107.795	121.5	103.077	0.0932508	0.6012	10.8461	0.0141042
Dpm1	139.4	135.015	146.674	131.224	98.6607	145.051	116.967	126.383	113.484	122.905	106.4	86.5294	0.0929455	0.6012	10.8555	0.0373042
Map3k20	122.706	143.406	127.273	125.25	145.933	143.833	134.92	121.75	93.3636	114.062	117.263	133.933	0.0932901	0.6012	10.8449	0.0821583
Marchf1	103.727	116.739	96.65	119.909	97.1803	92.5	103.848	103.9	102.333	97.8444	87.0877	94.5676	0.0933425	0.6012	10.8433	0.0539467
Mllt6	143.667	136.677	139.182	185.333	129.276	157.657	137.19	168.121	127.765	149.389	140.722	154.6	0.0930581	0.6012	10.852	0.0764229
Pea15a	123.635	125.371	112.963	126.92	124.427	123.28	119.771	123.94	125.364	128.222	128.293	126.77	0.0929761	0.6012	10.8546	0.0079579
Pld4	121.717	125.878	130.43	139.765	132.951	130.227	114.463	114.676	128.671	124.253	119.348	115.299	0.0929566	0.6012	10.8552	0.00627105
Rac3	115.308	80.84	173	124.8	121.167	78.5	95.619	91	108.545	84.1	149.8	133.667	0.0931368	0.6012	10.8496	0.200919
Tmco1	87.6042	112.661	100.254	99.0563	104.473	99.2241	96.8947	102.837	97.9375	97.5172	92.7436	89.4615	0.0931616	0.6012	10.8489	0.0293212
Ppp1cc	145.134	118.601	123.066	133.54	122.191	114.686	132.551	130.57	130.734	118.407	122.774	112.23	0.0934406	0.60142	10.8403	0.0122213
Pnpla8	101	104.107	99.5789	130	104.636	152.806	86.4815	149.091	126.133	102.552	96.7188	99.7647	0.0936627	0.602016	10.8334	0.0633534
Psme3ip1	132.652	115.19	114.273	100.533	90.4595	127.143	103.821	131.581	115.973	125.561	105.806	106.955	0.093675	0.602016	10.8331	0.0447647
Rhobtb2	90.75	101.833	85.3333	220.667	42.5	55.5	109.75	43.4	185.4	109.667	112	81.6667	0.0937251	0.602016	10.8315	0.492342
Bmp2k	127.4	121.119	104.905	98.4643	127.389	114.429	101.554	107.868	104.824	98.9474	86.5455	88.0588	0.0944492	0.602554	10.8094	0.0554328
Chd7	135	110.875	217.75	243	125.25	114	54	133	216	193.667	157.333	182	0.0943737	0.602554	10.8117	0.514842
Fbxl4	103.833	125.25	107	176.053	186.429	134	100.889	89.5455	105.5	127.462	158.062	98.1667	0.0941371	0.602554	10.8189	0.152379
Gm43305	173.243	193.007	180.284	186.858	214.255	205.086	186.752	191.392	190.59	198.479	193.294	151.857	0.0942035	0.602554	10.8169	0.0208017
Nras	109.688	127.777	109.5	114.181	116.098	123.016	110.256	110.037	109.192	115.28	115.301	112.048	0.0944343	0.602554	10.8098	0.0174917
Pde4dip	106.25	179.913	129.294	102.8	142.214	137.75	137.167	161.125	127	116.692	167.286	168.091	0.0944083	0.602554	10.8106	0.112611
Ppic	132.207	143.04	163.273	126.158	119.278	120.188	118	132.059	140.72	136.783	103.346	89.3333	0.0940733	0.602554	10.8209	0.0680557
Pus1	70.3636	123.765	153	114.643	129.438	112.45	124.722	123.667	100	137.636	82.8571	47.3333	0.0939321	0.602554	10.8252	0.118958
Slc46a3	90.8667	78.25	135.125	116.614	121.436	104.846	113.842	100	101.308	96.6087	101.25	106.417	0.0941804	0.602554	10.8176	0.0707032
Tmem176b	104	107.565	164	127.481	113.23	107.255	78.3571	86.9	90.5714	133.875	105	104.062	0.0939976	0.602554	10.8232	0.0614953
Fundc1	108.917	104.483	120.25	126.341	140.053	141.333	91.697	117.654	132.615	116.705	111.575	87.3571	0.0945688	0.602908	10.8057	0.0534938
Acbd6	85.3404	96.3704	87.5366	108.436	85.85	87.2708	100.017	80.5769	97.587	102.106	94.7179	107.25	0.0951052	0.604392	10.7895	0.038811
Agfg1	99.2549	134.082	124.343	105.02	118.978	114.044	101.554	122.269	130.265	141.978	107.581	75.0476	0.0952511	0.604392	10.7851	0.0338089
Brd4	114.03	126.041	96.4706	146.233	117.258	121.294	136.167	136.686	134.364	134.238	135.596	108.111	0.0952499	0.604392	10.7851	0.0429685
Gm49980	162.545	178.211	158.727	203.75	89.1667	125.2	146.448	175.882	174.667	172.778	108	167.5	0.0952	0.604392	10.7866	0.143821
Lrrc75a	106	111.917	153.692	84.4444	78.7143	111.2	110.706	119.6	78.375	120.9	121.8	196.667	0.0949845	0.604392	10.7931	0.130038
Ttc3	107.312	110.588	95.3333	153.061	120.829	134.25	110.385	100.379	145.5	106	110.087	90.1333	0.0952334	0.604392	10.7856	0.0764935
Ube2d3	109.094	119.914	110.701	111.862	116.299	114.83	109.432	110.468	110.344	105.715	100.682	107.748	0.0949145	0.604392	10.7952	0.00505159
4933427D14Rik	38.6667	183.5	175.333	296	254	124.714	95.6667	280			199.4	215	0.0968193	0.605128	10.738	0.511333
Acot2	137.75	101.714	108.2	119.25	117.214	149.333	80.1	120.286	116.95	123.667	106.111	133.25	0.0960595	0.605128	10.7607	0.119563
Add3	89.8667	79.375	120.286	167.778	80.6667	145.286	104.353	87.0714	95.9167	99.1667	106.083	40.25	0.0962511	0.605128	10.755	0.168046
Ahsa1	102.683	112.344	114.066	103.513	100.982	111.641	94.7888	102.036	111.439	102.053	97.2825	100.144	0.0962974	0.605128	10.7536	0.00601095
Amz1	129.75	142.59	185.5	105.889	144.5	132.824	90.8621	131.792	154.727	99.75	131.529	101.833	0.0960734	0.605128	10.7603	0.0672518
Anxa3	131.5	141.276	125.873	127.823	142.841	132.072	105.293	120.345	104.17	112.862	116.053	95.6711	0.0970068	0.605128	10.7324	0.0098013
Btbd7	134.667	144.231	144.692	155.632	118.867	70.1667	122.167	98.2857	103.533	188.143	137.214	107.667	0.0974036	0.605128	10.7206	0.144874
Caap1	200.714	118.222	215	145.5	87.3636	167.167	116.4	131.462	161.818	106.533	123.833	65	0.0960285	0.605128	10.7616	0.219625
Car13	88.7692	102.905	105.143	81.129	112.086	101.607	75.6842	84.375	83.2222	87.5	90.3333	65	0.0974225	0.605128	10.7201	0.0696109
Ccdc58	169.2	172.667	215.556	80.1429	168.5	129.263	108.929	159.842	149.294	122.111	130.8	129.4	0.0965243	0.605128	10.7468	0.145227
Ccdc90b	87.2857	101.36	152	100.818	91.2	114.324	102.735	100.684	113.783	129.591	96.4444	145.9	0.0959209	0.605128	10.7649	0.0633228
Crlf3	102.742	142.357	132.96	165.974	97.5	137.167	112.935	121.036	156.095	161.412	119.452	127.231	0.0956051	0.605128	10.7744	0.0558258
Cryz	109.667	82.625	139.889	97.7333	84	88	74.5	72.8571	91.6667	102.462	91.25	108	0.0975536	0.605128	10.7162	0.188004
Ddx49	113.895	115.471	108.806	86.3846	80.3462	130.115	103.769	101.727	104.273	93.625	95.9375	69.1429	0.097233	0.605128	10.7257	0.0739703
Dok3	155.958	125.364	166	156.793	121.673	128.81	122.787	106.651	136.214	105.958	135.462	146.857	0.096193	0.605128	10.7567	0.0369646
Eif3j2	76.125	132.059	102.75	149.375	88.8889	104	104.293	95.5714	119.579	127.375	83.1176	96.125	0.0970971	0.605128	10.7297	0.139347
Eola1	110.143	131	78.6364	104.7	111.385	87.7333	126.316	101	136.727	95.0625	95.6154	124.833	0.0971095	0.605128	10.7294	0.144991
Gm10524	131	160.889	195.75	161.556	67.6	83.3333	133.174	133.625	85.4	129	90.3333	83.25	0.0964473	0.605128	10.7491	0.275618
Ice2	216.286	150.667	196	203.5	113.875	212.6	172.8	149.6	212	280.667	188.667	100	0.0973471	0.605128	10.7223	0.289792
Irf2bpl	82.8	106.641	110.207	110	98.5625	113.654	90.2542	94.561	108.536	97.2593	85	96.4118	0.0969762	0.605128	10.7333	0.0536666
Itpr3	173.538	138.826	97.9286	169.8	191.438	175.5	147.75	138.565	142.739	189.842	115.889	154.143	0.0957225	0.605128	10.7708	0.0979167
Mat2a	163.957	150.062	166.739	191.977	152.771	146.317	157.57	155.011	179.939	165.724	177.053	155.28	0.0966934	0.605128	10.7418	0.025039
Mcrs1	108.824	90.7308	113.611	140.9	108.036	84.65	102.735	113.684	122.818	123	103.333	100.2	0.0963811	0.605128	10.7511	0.0802319
Nipsnap1	114	77.7778	152.375	160.333	138.571	147.727	142.286	92.4444	116.9	77.5714	121	82.75	0.0957929	0.605128	10.7687	0.182521
Noa1	81.625	142.125	122.75	77.8889	156.571	104.167	87.2308	95.625	48.6	84.5	161.4	50.4	0.0970541	0.605128	10.731	0.219
Nrbp1	141.105	111.379	137.833	123.77	106.793	138.333	122.206	133.944	116.441	135.577	129.058	96.6286	0.0960615	0.605128	10.7607	0.0352808
P2ry6	100.321	93.0048	106.464	108.78	110.553	109.234	101.946	97.7391	99.6803	124.02	99.2952	97.3363	0.0969135	0.605128	10.7352	0.0100705
Pigu	137.938	155.842	120.941	98.5909	121.727	102.423	83.0556	117.412	103.421	100.444	137.111	145.25	0.0957694	0.605128	10.7694	0.0841361
Ppid	218.636	191.129	150.765	133.2	175	139.417	163.12	149.75	140.909	87.3529	212.429	146.692	0.0958193	0.605128	10.7679	0.0970083
Qk	126.389	131.955	112.427	128.821	125.784	132.914	116.073	127.437	120.5	112.106	132.129	101.095	0.0960851	0.605128	10.7599	0.0122971
Rasal3	175.077	163.478	117	173.45	66	99.4167	170.062	124.941	139.125	149.875	107.5	184.4	0.0969707	0.605128	10.7335	0.143113
Tctn3	180.167	185.25	157.333	91.2	154.8	120.091	166.231	175.333	158.571	170.3	124.455	163	0.0975473	0.605128	10.7164	0.238142
Xiap	115.976	167.274	141.2	118.791	140.889	124.438	138.667	146.405	146.087	153.019	141.256	110.19	0.0974753	0.605128	10.7185	0.0354918
Zfp46	126.4	160.9	64.3333	95.6	84	67.4286	88.2727	61	109.667	120	96.375	106.5	0.0966593	0.605128	10.7428	0.290345
Wtap	117.117	125.04	140.615	108.307	114.552	111.31	119.5	119.214	110.508	120.8	125.14	117.442	0.0976624	0.605404	10.713	0.021426
Ccl2	101.396	108.94	120.802	90.5897	125.324	100.868	118.685	107.674	116.653	116.714	126	126.731	0.0979103	0.606193	10.7057	0.0179625
Rom1	37	117.875	58	124	38	110.333	128	169.5	66	140.6	156	88	0.0979186	0.606193	10.7054	0.428217
2010001A14Rik	218.5	104	187.6	211.727	115.167	214.5	172.333	111.167	156.6	151.25	111.4	153	0.0983363	0.607182	10.6931	0.305518
Slc35e3	165.875	163.333	140.75	102.625	80	174	137.429	128.778	119.8	115	139.5	123.5	0.0982374	0.607182	10.696	0.209726
Srxn1	99.5096	110.606	103.936	112.865	95.5301	117.299	107.919	111.918	103.116	114.783	102.776	102.24	0.0983237	0.607182	10.6935	0.0108453
Ubox5	164	73	124.8	154.833	70.8	194.2	109	163.8	162	100.5	136.538	151	0.0983346	0.607182	10.6932	0.356439
2610008E11Rik	183.75	76.5	134.333	204.833	102.4	109.667	167.556	114.333	140.2	159.667	126	174	0.0985535	0.607334	10.6868	0.395806
Cox7a2	110.673	109.62	116.116	99.7685	106.798	106.637	105.051	109.829	102.174	104.027	106.654	114.583	0.0998681	0.607334	10.6485	0.00609877
Dhx15	138.75	150.958	149.14	149.784	136	112.611	164.486	144.938	130.477	137.117	154.738	135.333	0.0997468	0.607334	10.652	0.0329782
Fgd2	107	119	197.333	138.934	160.375	129	147.833	175.308	128.562	131.681	151.5	144.222	0.0990986	0.607334	10.6708	0.0448354
Fry	120.5	63.5	149.375	148.571	248.667	163.6	190.75	87	136.667	158.75	93	76	0.0987792	0.607334	10.6802	0.410775
Gtf2h3	160.5	139.95	104.8	117	137.25	110.667	158.938	144.417	106	146.889	131.182	175.2	0.0993434	0.607334	10.6637	0.177728
Kif3b	109.824	112.226	167.24	118.889	133.192	132.026	128.107	117.059	109.952	107.259	150	102.875	0.0989906	0.607334	10.674	0.0592998
Lyl1	135.268	138.667	170.265	123.146	129.693	115.933	143.653	130.159	137.133	133.792	124.712	120.594	0.0996803	0.607334	10.6539	0.029109
Ndufb6	110.234	108	97.4159	89.9583	99.8649	95.8889	101.199	106.444	104.277	93.986	94.5152	96.6154	0.0993056	0.607334	10.6648	0.0159176
Nkiras2	110.267	132.425	108.656	113.147	122.66	111.057	117.2	115.941	112.422	102.617	101.308	117.111	0.0995508	0.607334	10.6577	0.034829
Pfkfb2	60.6667	174.667	214.875	184	186.75	322	149.75	282.5	196	62.6	196.75	219	0.0985892	0.607334	10.6857	0.445238
Ppp2r5d	138.32	85.871	113.667	108	129.138	116.8	115.677	124.531	97.8077	113.839	119.897	95.5455	0.0993539	0.607334	10.6634	0.0642373
Pts	135.304	87.2069	151.235	109.421	139.25	131.467	135.393	111.743	146.56	142.278	127.579	89.6	0.0999467	0.607334	10.6462	0.0633701
Pttg1ip	112.926	115.511	107.937	122.861	124.958	126.543	117.119	115.58	115.7	126.622	114.566	118.338	0.0990674	0.607334	10.6717	0.0152236
Rab43	154.167	96.6	120.312	110.676	115.706	111.875	98	97.8095	116.733	144.385	116.458	131.5	0.0998741	0.607334	10.6483	0.0682582
Sorbs3	101.6	130.429	183.833	226.5	167.5	189.125	123.2	121	94.5	198.5	246		0.0995979	0.607334	10.6563	0.288008
Srsf3	117.156	130.844	115.303	137.011	146.362	127.886	113.145	130.586	122.695	124.85	145.729	118.385	0.0992942	0.607334	10.6651	0.0155468
Stx17	123.625	164.042	139.133	210.176	131.923	112.643	171.667	140.053	146	145.75	133.125	156.625	0.100039	0.607334	10.6435	0.0879629
Tfb2m	79.75	135.15	125.923	106.15	179.833	139.357	138.235	152.118	157.3	172.588	167.25	157	0.0995449	0.607334	10.6578	0.126879
Tmem147	116.087	105.309	119.967	117.162	116.429	136.727	112.519	112.036	103.849	107.797	121.879	127.75	0.0990735	0.607334	10.6716	0.0251095
Tnfrsf22	123.667	120.625	208.75	161.625	131.333	84	89	103.25	187	92	128	147	0.10001	0.607334	10.6443	0.343366
Txnrd1	128.068	134.154	119.58	121.3	121.351	135.15	123.386	131.676	118.522	124.426	143.616	123.319	0.0985954	0.607334	10.6855	0.0109036
Yipf2	65	163	121.2	138.833	98.3571	75.2857	96.5	130.4	199	135	91.75	40.5	0.0987188	0.607334	10.6819	0.201546
Zfp292	192.833	163.833	168.8	99.2308	163.286	80.7273	204.4	114.5	184.25	255	23	100.571	0.0991191	0.607334	10.6702	0.227026
Zfp369	202.889	113.636	265.2	136.636	143.833	143.267	140.2	136	138.222	151.917	154.333	182.9	0.0996004	0.607334	10.6562	0.193749
Zfp715	138.4	174.913	118.562	163	109.867	153.769	137.062	172.85	142.833	180.538	114.909	105.333	0.0990998	0.607334	10.6708	0.115987
Prkag1	119.679	110.979	124.821	161.763	122.306	122.903	118.328	97.1316	110.143	144.3	125.179	139.882	0.100114	0.607397	10.6413	0.050195
Itgb1	124.679	129.047	126.119	123.255	122.894	118.524	126.926	125.669	124.06	123.766	111.409	118.669	0.100341	0.60799	10.6348	0.00650446
Nup62	133.804	119.038	110.444	113.694	118.362	101.034	97.9254	112.356	89.9508	101.225	125.688	104.194	0.100307	0.60799	10.6358	0.0293806
Rpl10a	101.247	104.096	94.6288	95.0252	97.9241	97.7489	91.8482	98.6662	99.6538	95.5349	92.9465	90.5401	0.100615	0.609256	10.6269	0.00286749
Btbd3	77.2	133.6	169.5	178.5	183.5	69	169.333	149.75	77.1429	85.3333	241.5	90	0.100993	0.610638	10.616	0.342453
Clec7a	139.842	108.869	118.76	128.104	116.853	119.364	122.158	142.163	110.3	117.745	106.905	112.453	0.101285	0.610638	10.6077	0.0116568
Ggact	139.632	114.565	257.5	129.632	87.3636	120.909	116.63	123.15	158.571	146.238	94.6923	104.5	0.101256	0.610638	10.6085	0.121937
Isoc2b	109.889	130.417	140.6	102.176	123.4	200.5	112.6	117.091	121.5	120.071	102	95.5	0.101359	0.610638	10.6056	0.160691
Ndrg3	96.9	90.7	147.35	118.2	131.368	129.19	113.6	117	124.292	104.045	96.6667	76	0.101256	0.610638	10.6085	0.079168
Rab8b	104.483	115.368	116.325	107.854	105.474	106.775	116.279	106.16	114.717	111.569	110.554	108.347	0.101019	0.610638	10.6153	0.00723113
Slc16a7	69.375	63.5556	90.3333	116.731	114.667	115.444	102.636	119.111	101	107.118	109.231	106.833	0.101362	0.610638	10.6055	0.127777
Slc25a19	193	107.167	127.778	114.35	158.6	105.667	123	135.357	129.8	108.318	123.125	109.333	0.101342	0.610638	10.6061	0.143325
2410004B18Rik	88.3077	134.75	155.214	95.9333	85.3333	112.533	148.158	88.4737	91.1053	134.625	111.286	170.444	0.101593	0.61124	10.5989	0.116471
Lrrc45	161	190.556	238	75.8571	129.714	145.444	137.308	135.571	228.5	113.333	153	98	0.101657	0.61124	10.5971	0.311678
Naa20	128.645	136.826	128.468	119.824	125.524	121.277	120.096	113.906	127.163	121.417	121.861	90.0851	0.101629	0.61124	10.5979	0.0154488
Tbc1d9b	97.641	108.018	124.208	104.347	116.654	122.064	94.9302	89.1277	124.731	103.386	109.836	126.48	0.101796	0.611687	10.5931	0.0360309
Mocos	106.836	120.14	110.062	113.761	111.817	93.7253	109.522	121.538	109.311	93.7176	90.75	97.5429	0.101998	0.612478	10.5874	0.0180672
Ppp2r5b	88.6818	99.6538	138.467	164.214	110.111	118.4	117.296	98.5	126.72	86.0476	113.421	120	0.102152	0.612478	10.583	0.072986
Prpf4	175.571	153.417	73.75	123.9	136.833	107.625	123.45	117.417	152.214	110.062	146.25	121.2	0.102175	0.612478	10.5823	0.120254
Smarca4	128.133	120.108	86.6304	106.155	115.889	115.532	98.6471	106.62	102.372	111.117	105.977	127.226	0.102188	0.612478	10.582	0.0306723
Gpn2	123.5	119.615	172.909	96.5714	133.524	144.417	109.2	98.9	137.571	91.2727	115.643	211.25	0.102263	0.612535	10.5798	0.149012
Gmcl1	116.667	131.125	126.238	94.0769	189.154	150.941	109.812	126.615	135.545	146.643	115.533	132.538	0.102402	0.612581	10.5759	0.112509
Suz12	68.3125	110.902	81.1667	118.85	115.227	91.3793	115.571	115.516	131.222	108.269	111.053	94.5455	0.102466	0.612581	10.5741	0.0677827
Zswim6	77.9	104.652	139.235	121.294	107.615	151.562	113.5	119.545	99.75	87.0769	121.636	161.75	0.102418	0.612581	10.5754	0.11495
2310001H17Rik	135.4	147.824	242	182.176	142.2	133.125	163.714	191.875	152.25	128.667	171.933	135.5	0.10299	0.612941	10.5593	0.144648
Armcx3	107	148.077	141.394	115.568	111.553	149.102	110.158	144.581	145.688	120.758	137.818	127.579	0.103438	0.612941	10.5467	0.0390619
Cdk11b	142.348	138.311	134.882	148.333	127.723	181.114	126.533	160.848	131.656	150.047	133.848	86.3889	0.103419	0.612941	10.5472	0.0441307
Chpt1	86.75	101.889	95.8824	113.893	113.8	130.742	106.706	108.875	104.611	95.8	102.263	85.8333	0.102632	0.612941	10.5694	0.0739118
Ctdp1	94.3125	145.8	132.143	93.4	82.5385	135	87.8571	111	146.778	114.278	140.462	91.6	0.10323	0.612941	10.5525	0.124148
Frs2	129.1	142.111	95.5294	183.5	135.214	125.214	116.875	118.143	87.2857	148.263	126.75	75.5455	0.102849	0.612941	10.5633	0.121417
Idh3a	160.526	126.568	101.324	145.789	114.154	116.304	143.8	118.49	130.972	122.889	134	111	0.102951	0.612941	10.5604	0.0681316
Phb2	99.7125	109.63	105.269	108.157	89.6364	97.0404	97.8209	97.7156	85.9425	97.4388	86.0333	91.0769	0.102857	0.612941	10.563	0.0195612
Pitpnb	113.212	141.426	118.389	119.5	96.4615	129.528	115.178	128.429	127.545	110.98	107.333	81.2	0.103322	0.612941	10.5499	0.0447031
Rabl2	220.5	76	216.667	135	117.833	268	181.5	131.25	88.3333	159.167	147	38	0.103325	0.612941	10.5499	0.421994
Rad21	121.973	122.333	91.2292	130.967	110.585	116.061	114.208	110.758	114.476	111.712	109.791	115.731	0.103241	0.612941	10.5522	0.0334991
Rbmxl1	81	104.578	129.727	117.031	129.222	117.353	134.086	98.3571	111.622	123.067	104	95.0526	0.103308	0.612941	10.5503	0.0519722
Ubl4a	74	105.48	104.711	140.852	112.778	108.677	87.6875	131.976	106.63	109.026	119.696	74	0.103382	0.612941	10.5483	0.0517071
Vcp	97.1776	106.04	101.217	96.2347	95.3482	105.685	94.7713	104.697	100.502	101.273	93.3362	101.386	0.103232	0.612941	10.5525	0.00656657
Ctso	129	144.975	94	104.644	144.415	122.8	137.24	126.619	121.263	119.226	120.528	97.1667	0.103562	0.61329	10.5432	0.0527161
Eef1d	100.988	103.813	98.8509	93.7293	86.8288	101.13	87.9484	89.7647	105.945	98.082	88.3578	90.3382	0.103763	0.613705	10.5376	0.0145748
Phpt1	102.944	123.16	118.4	99.3636	83.3529	146.444	123.053	119.462	92.8462	108.636	93.1765	88.1429	0.103703	0.613705	10.5393	0.101339
Plekhj1	120.372	148.788	127.573	143.137	131.906	126.472	117.612	129.724	128.839	149.785	123.724	109.063	0.103967	0.614527	10.5319	0.0174658
Pkig	111.143	108.091	99.8182	121.149	104.51	125.541	108.641	108.634	119.421	110.02	99.7105	91.5385	0.104036	0.614551	10.53	0.041952
Pyurf	108.25	129	92.3333	85.5714	74.6667	98.6667	98.6	121.043	87.125	99.3529	107.938	79.8333	0.104576	0.616608	10.5149	0.115548
Wdr47	180.714	165.857	174.571	109	190	109	212.444	142.667	158.6	200	175.667	238	0.104581	0.616608	10.5148	0.26961
Zbtb11os1	68.3333	117.462	85.9091	129.125	117.9	128	58	68	94.3333	75.0909	119.6	130	0.104571	0.616608	10.5151	0.191183
Mtrr	95.5263	126.852	102.167	187.111	77.9	171.833	122.895	140.545	88.2857	145.125	158.833	157.8	0.104761	0.617202	10.5098	0.122207
Slc4a7	171.5	174.25	113.75	170.333	162.929	107.091	131.75	144.353	102.375	158.625	104.143	49	0.104813	0.617202	10.5084	0.14395
Mtarc2	85.913	80.956	102.776	84.3523	101.638	93.48	92.4756	93.7397	102.091	92.1456	80.5217	77.6857	0.104893	0.617288	10.5061	0.0204399
Scaf4	120	154.739	109.7	108	82.6429	169	149.889	122.571	102.2	159.714	122.938	137.333	0.105055	0.617467	10.5016	0.147911
Tgif1	113.963	124.67	116.682	106.954	134.861	124.303	117.179	115.8	127.742	121.421	128.588	108.548	0.10499	0.617467	10.5034	0.0227347
Agpat4	117.889	73.5294	131.2	62.75	108.083	90.4286	73.2222	110.091	112.692	102.053	89.9286	100.6	0.10528	0.617479	10.4954	0.131193
Fam210b	87.3077	95.8667	85.6	142.375	109.167	95.4545	117.214	107.188	109	103.864	150.909	81.4	0.105233	0.617479	10.4967	0.138115
Nans	99.5	97.6122	105.675	91.9194	120.529	95.5	95.125	98.3636	102.145	93.6531	101.833	82.4286	0.105385	0.617479	10.4925	0.0395945
Nelfcd	138.875	175.545	129.062	120.269	129.545	167.864	126.778	117.714	109.357	120.462	144.526	99.8	0.105252	0.617479	10.4962	0.0904845
Ube2z	126.263	133.78	114.47	131.667	110.342	139.869	116.159	102.42	117.491	111.795	111.9	100.875	0.105361	0.617479	10.4932	0.0249838
Dmxl2	200.455	163.516	202.154	201	188.5	112.647	192.154	185.769	100.833	214.25	182.615	167.75	0.105908	0.619775	10.4781	0.127782
Stk19	171.714	129.875	158.471	161.636	138.875	170.083	168.167	166.1	132.238	156.462	136.211	123.8	0.105894	0.619775	10.4785	0.0838281
Gnpat	128.562	134.483	112.375	114.657	178.179	146	131.083	129	102.731	110.667	131.417	132.308	0.106015	0.61993	10.4752	0.0627257
Heatr1	117	120.926	78.4	146.286	123.545	155.2	109.522	64.9231	88.625	136.727	150.429	121.143	0.106067	0.61993	10.4738	0.134279
Bcl2a1d	114.333	125.632	125.111	84.875	89.1333	78.3846	99.2857	140.552	93.6	93.7273	98	109.917	0.106216	0.620417	10.4697	0.14342
Mob3a	113.946	107.021	133.741	123.273	127.054	89.7317	120.348	123.811	116.628	121.396	113.146	108.154	0.106285	0.620434	10.4678	0.0405728
Bcor	78.2083	91.913	129.091	103.688	128.579	98.4667	129.852	130	111.375	108.929	104.231	150.429	0.106523	0.621054	10.4613	0.095975
Ptafr	92.6667	115.182	117.234	113.146	108.64	110.337	103.333	114.211	111.269	113.148	115.33	104.969	0.106483	0.621054	10.4624	0.00882156
4930430F08Rik	73.8333	127.4	128.857	94.6667	161	215.444	149.5	122.8	133	95	135.143	109.667	0.106896	0.6217	10.4511	0.337132
Fam135a	130	179.786	231.375	139.429	117.375	99.6667	208.75	167.5	122.333	178.167	78.5	112	0.106898	0.6217	10.451	0.248834
Gm50461	83.5	78.4	150	119	127.75	83.3333	200	130.833	149	164.625	168.8	81.25	0.106891	0.6217	10.4512	0.337137
Pkib	139.583	124.958	135.4	102.089	115.296	124.333	153.577	113.205	121.393	133.577	95.375	120.333	0.106789	0.6217	10.454	0.0514976
Cdkal1	137	158	78.8571	77.4	132	132	121.182	103.333	110.667	109.2	137.4	76	0.107462	0.622444	10.4357	0.289881
Esyt1	129.5	118.82	118.321	108.632	117.356	123.029	121.952	115.595	124.464	106.825	97.4749	105.326	0.107237	0.622444	10.4418	0.00703154
Fam168b	98.3902	111.595	117.65	135.438	125.582	126.417	124.106	115	124.765	111.097	105.79	117.516	0.107509	0.622444	10.4345	0.0284318
Fem1a	141.667	121.192	112.231	101.857	82.2143	132.565	126.3	96.6	106.423	115.083	97.087	102.684	0.107223	0.622444	10.4422	0.0767808
Mcl1	117.708	115.882	116.374	124.684	123.112	127.502	117.025	115.694	118.206	121.733	123.769	113.013	0.107563	0.622444	10.433	0.00294385
Rbbp5	169.444	135.955	134	158.267	124.917	121.875	139.312	140.55	103.3	140.056	110.462	111.077	0.107508	0.622444	10.4345	0.0821612
Rgl2	187.2	177.975	200.982	209.04	176.4	198.815	183.271	142.047	200.85	220.732	196.14	164.741	0.107621	0.622444	10.4314	0.0299753
Snx15	113.652	91.7027	112.611	96.4545	129.8	153.458	123.324	125	112.217	110.421	102.621	126.8	0.107351	0.622444	10.4387	0.068227
Zfyve26	85.4	168.263	221	142.92	137.48	158.812	181.5	146.389	117	140.6	146.389	137	0.107572	0.622444	10.4327	0.104327
Slc25a36	183.394	173.192	180.414	182.091	128.379	139.757	146.588	160.69	174.8	137.353	137.367	143.778	0.107889	0.623608	10.4242	0.0566531
2410006H16Rik	140.341	139.018	141.571	148.444	129.971	119.474	139.373	148.75	143.387	132.83	126.16	116.04	0.108139	0.624355	10.4174	0.0258497
Tle1	107	120.158	110.727	58.2857	138.556	146.762	118.167	170.312	183.333	132.917	183.188	101.25	0.108217	0.624355	10.4153	0.130191
Zmat1	58.3333	168.2	140	362.333	125.6	106.4	72	15	53.5	62	105.8	166.25	0.108197	0.624355	10.4159	0.347195
Sema4b	318	44	168	110.5	163.833	165	147.333	201	130.5	95	136	128	0.10848	0.624496	10.4082	0.520411
Smad5	90.3333	109.9	95.4286	214	129.7	142.857	116.125	133.417	160.2	226	119.364	66.6667	0.108341	0.624496	10.412	0.221531
Tox4	108.976	106.915	83.2286	100.358	124.413	99.8065	121.024	104.25	110.5	111.973	111.96	80.9643	0.108432	0.624496	10.4095	0.0323277
Zfp120	180.5	142.786	127.5	147.238	104	107.167	121.167	121.64	110.95	105.368	141.316	108.9	0.108507	0.624496	10.4075	0.0846139
Dennd2d	264	224.625	177	69.25	194.667	118.667	152	165.833	184	108.1	107.667	261.5	0.10885	0.62465	10.3983	0.519916
Dpagt1	114.548	92.9535	120.756	104.717	120.277	107.922	87.5192	105.39	113.488	100.367	110.405	118.889	0.108732	0.62465	10.4015	0.0352592
Drg2	116.2	133.98	110.424	144.758	119.289	119.61	119.64	96.5106	100.622	93.9762	109.121	99.8966	0.108607	0.62465	10.4048	0.0426427
Nipsnap3b	161.097	133.12	149.61	143.873	140.294	140.462	111.661	135.456	142.116	105.568	93.3077	139.571	0.108866	0.62465	10.3979	0.0362295
Sfswap	209.062	128.167	181.786	135.35	141.375	148.947	155.421	140.45	175.154	171.933	208.545	139.5	0.108761	0.62465	10.4007	0.0920416
Micos10	119.931	118.492	122.245	110.449	112.5	120.025	111.844	116.166	111.086	115.099	110.074	106.5	0.108934	0.624663	10.396	0.00938271
Txndc16	115.714	104.444	122.583	118.806	68.5	147	135.188	112.353	137.429	120.679	133.5	121.667	0.109033	0.624851	10.3934	0.0888324
Fus	108.775	128.887	120.333	140.345	135.5	123.543	116.259	101.12	113.792	123.392	127.944	119.75	0.109211	0.625028	10.3887	0.0229837
Gstt3	123	90.3	136.833	124.462	102.222	147.333	110.375	107	116.333	101.9	79.1	97.8333	0.109321	0.625028	10.3857	0.207714
Ifi204	112.774	118.609	135.717	120.492	117.328	120.739	106.303	134.667	144.383	131.773	117.104	117.415	0.109468	0.625028	10.3818	0.00523804
Pes1	108.073	109.576	80.9444	95.4091	105.018	110.759	90.6721	104.377	102.079	92.9636	102.569	91.1538	0.109201	0.625028	10.3889	0.0305556
Pwp2	108.462	128.304	117	171.75	82	91.2857	151.333	123.5	95	80.9	122.625	172	0.109385	0.625028	10.384	0.146253
Rbsn	64	95.8235	109	134.167	91.1875	117.111	95.4	78.8333	199.25	73.5263	120.125	90.8333	0.109421	0.625028	10.383	0.154971
Tbc1d4	133	75.5	53.3333	144.727	165.25	171.7	113.833	172.167	97	122.25	109.889	287	0.109586	0.625028	10.3786	0.230636
Tomm5	129.845	135.675	139.327	114.386	119.291	114.015	114.976	123.532	127.482	92.3125	130.091	114.667	0.109596	0.625028	10.3784	0.0269568
Manf	101.373	110.139	116.444	116.064	104.708	97.7333	99.7963	107.517	113.477	111.78	116.898	110.743	0.11	0.625818	10.3676	0.0158043
Phf11d	152.125	153.444	166.378	117.836	117.304	123	63	150.875	157.326	128.469	125.602	127.969	0.109987	0.625818	10.368	0.0257909
Tsc22d1	140.143	166.148	85.3	104.771	129.391	151.938	160.64	153.625	148.562	111.875	149.522	104.2	0.11	0.625818	10.3676	0.0636051
Usp54	98	156.167	25	18	160	126.5	71	201	398	151	121.5	0	0.109974	0.625818	10.3683	0.576017
Gm14327	160.8	75.4	53.25	146	129.8	109.8	75.375	90.2	100.111	128.167	107.25	124.25	0.110218	0.626423	10.3618	0.345394
Gm2026	165	150.636	150.833	151.24	109.5	132.091	138.833	136.25	117.227	137.818	99.9333	99.2	0.110308	0.626423	10.3595	0.106799
Pycrl	100.9	133.444	209.2	139.583	117.706	120.154	154.05	165	101.25	124.625	118	138.154	0.110506	0.626423	10.3542	0.129428
Specc1	103.457	116.677	99.9535	110.308	85.7872	123.974	121.387	138.17	112.738	104.62	104.475	104.2	0.11049	0.626423	10.3547	0.0375168
Srek1ip1	82.0769	123.148	107.944	109.333	132.417	146.609	117.235	120.043	116	131.429	118.647	128.9	0.110326	0.626423	10.359	0.0828718
Thg1l	118.444	101	89.1	75.4444	52.2	122.5	163.5	124.857	133	148.667	46.6667	98	0.11044	0.626423	10.356	0.207119
Zbtb1	109	117.455	77.6667	125.071	183.867	144.211	98.913	122.6	114.636	110.867	92.8235	120.833	0.111008	0.628888	10.341	0.116191
Axl	114.5	125.893	124.421	101.039	117.229	105.814	122.364	97.3	104.417	124.564	96.54	104.429	0.111387	0.630654	10.331	0.041826
Fam234a	119.355	111.258	122.23	133.14	115.797	111.819	115.444	102.913	119.51	123.434	110.713	114.982	0.111979	0.632875	10.3155	0.0169106
Gmeb1	89.8182	164.143	33.6667	10	65	119.571	110.917	64.5	175	113.4	100.6	66.25	0.111981	0.632875	10.3155	0.322358
Lmo2	138.971	129.935	112.476	125.928	119.888	121.586	131.009	110.424	124.53	125.744	115.286	113.881	0.111969	0.632875	10.3158	0.0116038
Arf3	117.444	105.353	115.598	114.871	130.4	119.344	112.279	117.452	110.467	111.14	114.218	104.338	0.112194	0.632939	10.3099	0.015365
Oas1b	176	153	259	183.778	230.393	234.211	243	252	222.385	213.043	216.615	149.714	0.112183	0.632939	10.3102	0.128877
Trio	123.588	112.194	164.944	182.556	111.435	134.286	139.457	105.84	163.81	146.167	176.826	133.182	0.112181	0.632939	10.3102	0.0781078
Ddx52	73	116.429	135.778	138.696	108.111	144.667	125.8	99.48	111.588	104.538	103.478	132	0.112426	0.633113	10.3038	0.0844577
Esyt2	129.947	164.036	130.545	126.871	141.059	188.95	152.387	111.308	133.136	136.5	108.95	121.462	0.112297	0.633113	10.3072	0.080525
Sf3a1	114.409	100.167	118.407	106.406	97.2581	82.359	109.185	106.452	108.238	109.821	100.227	105.714	0.112361	0.633113	10.3055	0.052849
Glul	108.323	92.5795	105.612	109.017	110.207	105.494	95.6885	98.3889	84.8043	100.489	101.892	108.75	0.112507	0.633188	10.3017	0.0153072
Zfp593	125.583	111.667	145.5	84.2	103	138.429	100.96	85.4286	94.25	116.87	102.125	98	0.112627	0.633483	10.2986	0.0936238
Gmds	75.6667	111.583	164.2	183.167	102.167	86.4	129.214	126.955	132.364	117.778	112	106	0.113125	0.635906	10.2857	0.244897
Afg3l2	134.514	141.786	124.654	127.641	107.455	103.656	127.966	138.625	104.656	129.735	119.105	119.25	0.114035	0.637083	10.2622	0.0404024
Capn15	182.778	175	144.5	205.467	108.923	168.429	144.929	181.25	228.111	128	152.5	204.8	0.114079	0.637083	10.2611	0.157863
Evl	137.66	151.795	161.172	135.893	140.746	124.695	148.908	120.333	140.103	107.694	127.293	117.887	0.113469	0.637083	10.2768	0.0137207
Gtpbp2	224.706	184.549	161.366	171.254	149.353	197.845	162.964	173.976	134.656	179.406	183.429	127.957	0.113788	0.637083	10.2686	0.0354089
Itgb2	131.218	133.53	135.263	133.803	129.77	138.278	125.56	125.068	130.994	130.211	126.553	110.468	0.113624	0.637083	10.2728	0.00422923
Psma6	102.863	110.841	108.212	104.519	98.0943	103.344	94.2115	107.863	98.41	103.145	109.138	96.0455	0.113881	0.637083	10.2662	0.00971256
Rbm12b2	252.571	96	190	185.353	169.9	135	179.6	202	228.333	343	153	109	0.113709	0.637083	10.2706	0.174078
Serpinb8	103.667	111.407	128.273	163.278	117.55	113.375	114.462	111.097	99.8	121.087	129.294	99.8333	0.114071	0.637083	10.2613	0.061815
Slfn2	108.084	97.5369	113.13	104.434	103.223	105.117	98.0822	98.8228	98.4075	102.34	101.038	98.1126	0.113774	0.637083	10.2689	0.00299823
Sqle	129.373	131.422	104.674	128.478	123.167	148.05	115.025	112.802	101.625	104.191	99.25	121.167	0.113749	0.637083	10.2696	0.0364169
Tmem189	87.9653	100.964	104.968	97.5097	103.172	99.7849	93.7674	101.112	105.683	101.771	100.845	110.16	0.113837	0.637083	10.2673	0.00719
Card9	169.308	209.882	158.8	139.133	163.273	135.846	207.6	140	120.444	118	90.6667	219.375	0.114619	0.63711	10.2472	0.134832
Exoc2	91.25	136.176	112.045	110.545	120.077	99.4516	129.88	128.407	92.1176	113.13	133.864	91.25	0.114409	0.63711	10.2526	0.0648899
Exoc4	95.4872	120.28	118.412	95.4107	95.5333	112.974	95.5185	124.116	102.4	107.128	108.833	103.647	0.114611	0.63711	10.2474	0.0428763
Kif5c	64	64.5	166	177	179.727	171.167	130.125	119	162.25	76.5	134.286	220.667	0.114757	0.63711	10.2437	0.204874
Mia2	128.674	130.667	117.455	130.97	103.478	128.143	130.794	137.208	131.157	121.87	116.697	103.55	0.114897	0.63711	10.2401	0.0274535
Pigh	90.1667	134.6	145	193.25	108.909	197	90.5333	93.2	143.8	148.25	85.4	118.667	0.114626	0.63711	10.2471	0.209124
Ptpn2	146.333	133.704	138.9	160.222	92.381	123.238	141.8	78.3684	90.1538	71.625	164.75	101.667	0.114741	0.63711	10.2441	0.0883114
Rsl1	156.5	181.333	96.75	105	136.111	91.4444	105.667	99	127.4	120	61.25	227.667	0.114791	0.63711	10.2428	0.256071
Serbp1	105.942	104.745	93.4094	94.7819	91.033	95.497	100.549	97.658	96.4191	90.1667	95.3786	97.2927	0.114233	0.63711	10.2571	0.00954151
Strap	103.175	105.775	100.264	107.167	122.2	108.208	103.457	108.837	112.753	90.873	107.026	114.732	0.114533	0.63711	10.2494	0.0192659
Zfp746	99.8889	128.444	112.778	135.81	127.65	141.455	119.158	176.333	130.7	120.474	121.133	99.2	0.114848	0.63711	10.2414	0.106681
Zfp931	90.1	103.462	178.818	168.357	100.455	141.556	154.909	139.389	122.429	104.067	130.125	115	0.114603	0.63711	10.2476	0.209136
Tbc1d24	124.571	139.714	81.1111	157	187.455	197	157.85	142.286	179.786	174.833	176.857	102.333	0.115	0.63731	10.2375	0.310227
Bag3	94.8913	90.6543	118.509	93.0755	96.0962	91.7333	92.7576	110.068	99.9412	102.865	93.4	102.55	0.11559	0.637769	10.2225	0.0304241
Ccdc85b	105.208	89.6129	95.1429	86.4615	94.3889	119.708	101.324	87.6538	123.55	80.7083	101.962	96.2	0.11569	0.637769	10.22	0.0659352
Dis3l2	84.4667	135.692	126.222	69.2857	116.533	107	95	178	105.182	114.308	92	92.8571	0.115693	0.637769	10.2199	0.164837
Lpp	139.818	132.833	126.765	141.417	179.688	168.478	199.4	137.125	121.8	136.067	119.667	122.615	0.115387	0.637769	10.2276	0.106538
Qpctl	96.6875	83.6154	127.8	122.174	89.8	78.5833	112.5	140.727	128.429	128.333	72	118.5	0.115457	0.637769	10.2259	0.118905
Rheb	118.419	123.588	118.91	104.048	101.452	120.775	125.206	118	120.5	111.614	109.934	96.1163	0.115577	0.637769	10.2228	0.0141004
Rnf20	138.095	184.28	125.167	120.467	182.286	150.5	157.87	130.1	100.231	129.96	136.24	140.667	0.115501	0.637769	10.2247	0.0746332
Sbno2	114.255	119.117	133.795	145.304	154.979	154.615	141.791	126.406	143.467	121.1	129.357	113.793	0.115625	0.637769	10.2216	0.0306036
Tsg101	112.758	120.163	113.894	97.4308	99.8182	119.315	112.094	91.5735	118.884	89.8833	109.615	93.9677	0.11537	0.637769	10.2281	0.0238417
Myo18a	106.083	102.969	150.889	119.073	141.533	102.98	125.406	128.296	110.824	128.75	99.4054	78.8667	0.115813	0.638058	10.2168	0.0503291
Smurf1	65.1667	117.875	123.864	131.095	82.875	95.2941	112.04	130.917	101.769	136.818	95.2727	111	0.115938	0.63837	10.2137	0.0895935
Actr6	119.25	145.429	151.75	193.929	123.6	168.214	153.571	152.75	178.143	196.25	108.1	110.571	0.116102	0.638437	10.2095	0.15014
Casp7	151.214	156.833	100.917	144.783	119.75	121.111	155.75	122.714	142.097	144.714	127.714	124.875	0.116079	0.638437	10.2101	0.0945379
Fcho2	113.812	140.957	162.195	168.394	136.286	121.463	135.16	122.135	122.946	128.46	106.804	125.029	0.116154	0.638437	10.2082	0.0331435
Akap8	172.969	145.05	185.792	185.051	193.333	163.353	162.548	165.87	181.583	172.68	134.3	141	0.116691	0.639461	10.1946	0.0476385
Banp	147	137.8	191.429	185	120.833	73.875	146.2	127.857	111.222	89.3333	131.667	103	0.1165	0.639461	10.1995	0.237197
Eml2	129.467	135.071	86.7647	158.684	96.125	145.652	126.654	117.297	115.071	142.129	166.474	120.923	0.116748	0.639461	10.1932	0.0878726
Glipr2	93.625	110	126	93.0667	153.667	173	73.2	81.0833	171.25	116.846	80.5		0.116686	0.639461	10.1948	0.268284
Nub1	91.806	107.128	108.667	120.182	121.472	111.824	101.696	104.062	108.951	108.449	97.2991	110.957	0.116723	0.639461	10.1938	0.0157555
Zyg11b	85.5294	112.903	97.2857	123.793	100	160.5	143.227	115.062	152.692	125.6	84.0769	112.125	0.116469	0.639461	10.2002	0.081602
Gpatch11	103	95.1429	87.6	151.571	109.1	153.667	116.647	110.889	101.167	84	91.7778	102	0.116898	0.639913	10.1894	0.16704
Cd274	129.438	140.369	113.269	141.607	139.337	142.284	117.093	129.117	132.743	132.132	135.125	114.767	0.117013	0.640171	10.1865	0.0147631
Fbxo45	72.5	148.125	92.7	142.789	135.625	102	125.667	98.0625	107	123.375	121.188	100.667	0.11719	0.640767	10.1821	0.156648
Gde1	134.286	121.626	108.701	108.577	114.533	113.815	122.768	114.734	100.286	116.5	106.213	93.3684	0.117261	0.640784	10.1803	0.0215228
Eif3a	141.352	138.859	129.886	131.304	123.694	128.02	110.697	125.929	116.743	106.627	125.379	129.564	0.117763	0.641661	10.1678	0.0144019
Homez	95.3333	94.1	144	126.833	181.8	139.667	110.917	114.308	89.4286	88.25	136.5	82	0.117831	0.641661	10.1661	0.317689
Pomgnt1	132.25	126.222	141.5	112.826	87.7222	84.6667	75.3636	120	116.333	105.308	107.714	129.231	0.117502	0.641661	10.1743	0.0833957
Pou2f1	130	163.6	99.7143	250	95	87.25	119	148.667	177.6	101.75	113.6	128	0.117755	0.641661	10.168	0.350619
Scamp1	121.4	116.985	111.774	114.026	102.194	147.724	128.689	108.979	126.296	143.886	114.435	100.143	0.11772	0.641661	10.1688	0.0451947
Tbc1d23	154.383	145.431	125.175	147.34	152.634	127.393	151.5	179.455	148.174	171.222	155.583	148.429	0.117714	0.641661	10.169	0.0355559
Ttc4	178.438	134.562	190.083	117.833	86.375	122.471	112.304	147.263	140.4	100.316	135.538	116.364	0.117991	0.642162	10.1621	0.123928
Cd300ld	49.9715	61.1954	45.4437	42.9397	60.2361	47.3839	45.172	45.6917	55.5574	64.6117	55.6183	69.6647	0.1181	0.642382	10.1593	0.00574624
Alkbh8	75.25	191.333	178	103.25	115	164.167	64.75	63	116.5	75.2222	88	145	0.118851	0.642647	10.1407	0.274072
Arhgap18	105.349	95.6111	119.16	126.078	102.642	114.329	96.0926	103.6	101.68	111.453	78.0455	100.909	0.119037	0.642647	10.1361	0.0281558
Dbt	95.3333	187.5	111.143	82.2857	99.75	145.5	139	117.857	130.667	189	87.875	43	0.119013	0.642647	10.1367	0.24135
Fbxl18	160.571	149.286	116.923	100.875	179.286	101.5	156.364	219	140.778	158.8	132.182	79.6	0.11867	0.642647	10.1452	0.198925
Fbxo33	149.208	124.524	161.5	117.065	191.053	152.208	122.2	129.867	133.759	147.625	177.111	144.923	0.118446	0.642647	10.1507	0.0676716
Kmt5b	119.786	152	195.417	125.85	151.304	138.818	138.125	127.474	109.667	128	122	135.5	0.118774	0.642647	10.1426	0.100422
Letm1	82.5333	110.184	95.8	101.15	123.622	118.226	84.717	112.795	85.3548	106.967	90.64	81	0.118949	0.642647	10.1383	0.0471547
Mfsd7a	57.75	89.6667	360	176.462	118.333	189	111	181	100	117	105		0.118861	0.642647	10.1404	0.307286
Pdlim5	118.868	104.618	105.944	128.26	139.219	141.591	114.375	100.259	125.718	134.453	121.25	124.15	0.118672	0.642647	10.1451	0.0474071
Phldb3	113.5	118	85.6	74.5	154.1	73.2857	137	127.857	113	102.583	73.2857	93.5	0.118534	0.642647	10.1486	0.241632
Ppp1r21	131.556	120.931	126.562	136.25	140.341	92.3043	136.75	125.571	131.647	112.182	132.926	173.538	0.118424	0.642647	10.1513	0.0576777
Rps6ka1	118.605	108.263	100.623	129.215	116.789	126.627	117.08	101.161	110.745	103.188	113.017	131	0.118916	0.642647	10.1391	0.0285608
Soga1	82.1667	142.8	98.375	95	82	128.444	65.7143	107.455	105	131.5	153.25	79.6	0.119034	0.642647	10.1361	0.155941
Arglu1	134.526	137.333	195.629	147.75	168.73	144.194	165.521	157.088	185.429	140.44	200.368	175	0.119842	0.643325	10.1162	0.0526887
Dhx30	129.278	131.545	179	150.652	116.533	125.75	128.808	120.087	102.4	112.9	146.3	143.7	0.119639	0.643325	10.1212	0.0829608
Hpgds	127.41	130.57	139.396	142.974	148.052	140.158	124.665	121.788	146.279	134.693	130.31	134.574	0.119884	0.643325	10.1152	0.0124725
Jarid2	159	169.091	101.857	93.0909	125.4	134.556	120.667	48.5	101.25	94	165.2	136	0.119755	0.643325	10.1184	0.2108
Memo1	147.405	137.447	109.133	149.929	114.579	124.786	133.592	122.679	138.758	135.63	131.079	104.136	0.119667	0.643325	10.1205	0.0374834
Prelid1	107.676	112.71	103.674	99.5441	104.516	112.809	99.4796	102.197	102.344	100.004	110.274	105.802	0.119423	0.643325	10.1266	0.00732216
Ptgir	258	124.286	138.25	184.2	99.75	59	135	127.667	119.5	73.2	111	42	0.119914	0.643325	10.1145	0.348774
Rbm28	191.65	170.926	194.333	123.619	165.571	137.5	136.864	169.562	187.333	164.833	103.556	135.4	0.119539	0.643325	10.1237	0.0728322
Rptor	126	137.574	137.64	124.179	142.28	138.654	115.135	122.41	110.87	126.069	105.229	118.5	0.119783	0.643325	10.1177	0.0565234
Tmem154	105.259	111.852	110.153	111.915	124.431	126.364	112.351	98.1613	104.163	118.531	97.6333	95.3333	0.119782	0.643325	10.1177	0.0166136
Zfp143	76	105.1	110.143	107.7	183.571	94.625	135	135.444	139.111	117.333	112.9	37	0.119822	0.643325	10.1167	0.210765
Rgl3	223.5	179.167	86	128.143	164	284	181.667	81.5	94.3333	192.5	130.429	138.833	0.120057	0.643722	10.111	0.388883
Cbr3	90.8571	104.629	89.2414	119.205	116.469	84.2727	120.714	110.591	85	101.577	86.8485	73.4444	0.120388	0.644602	10.1028	0.0505141
Cln3	113.729	139.078	135.186	142.253	146.252	141	144.708	145.311	128.826	160.547	155.732	133.388	0.120556	0.644602	10.0987	0.0188409
Dock5	207	134	130.2	215.25	97.8	156.5	135.083	116.923	110.417	128.429	133.714	413	0.120544	0.644602	10.099	0.246317
Trim27	120.067	118.733	103.3	118.138	133.529	99.6	112.16	114.39	115.912	131.172	115.714	119.222	0.12048	0.644602	10.1006	0.0467619
Zfp943	184.273	126	216.286	129.25	89.1	196.333	151.8	108.667	214.2	117.444	97.3333	118.667	0.120563	0.644602	10.0985	0.18701
Pqlc3	109.015	106.618	129.829	114.471	123.487	124.146	115.141	116.164	104.731	118.487	122.426	114.621	0.120684	0.644755	10.0956	0.0192297
Rpp14	83.7273	119.529	113.167	66.8571	78.8421	94.1667	91.75	94.5333	115.5	115.667	98.3333	87.8333	0.120729	0.644755	10.0945	0.106258
Fbxo25	135.429	147.789	153.4	89.6429	114.118	108.625	141.25	147.6	137	124.909	84.3	122.75	0.121051	0.645323	10.0866	0.110842
Mbtd1	223.125	165.444	107.4	209.286	104.214	214.286	199.923	115.1	172.222	154.5	183	87.6667	0.120994	0.645323	10.088	0.219305
Pakap	110.476	117.954	110.75	108.211	63.0476	95.875	93.6452	102.577	61.875	113.167	112.25	81.125	0.121178	0.645323	10.0835	0.0607442
Pskh1	152.6	118.593	102.923	113.5	107.238	124.75	113.542	73.8333	122.2	121.433	124	99	0.120936	0.645323	10.0894	0.0782127
Rps27	108.941	100.364	101.639	101.735	109.225	105.757	101.962	102.872	100.51	95.8807	112.899	99.8596	0.121177	0.645323	10.0836	0.00632198
Cisd2	128.758	143.343	133.843	136.25	103.821	139.404	134.295	127.981	125.016	133.136	127.605	113.794	0.121456	0.645706	10.0768	0.0305357
Coq4	112.889	80.8889	151.625	175.889	117.667	109.25	122.111	90	149.077	119.75	130.714	93	0.12145	0.645706	10.0769	0.223932
Dhrs4	129.25	100.842	144.062	89.6667	127.55	104.429	121.87	117.55	115.609	146.826	119.556	142.714	0.1214	0.645706	10.0781	0.086138
Camta1	176	134	78.5556	147.688	154.125	148	119.688	147.182	151.2	187.286	139	204	0.121848	0.646119	10.0673	0.157301
Pdlim2	92.4062	110.067	103.821	94.44	128.243	84.1481	119.667	91.8182	108.76	110.579	91.5357	82.125	0.121834	0.646119	10.0676	0.0559312
Rfc2	126.37	124.064	136.179	133.617	109.312	104.318	117.674	99.3529	135.314	115.515	95.931	106.615	0.121946	0.646119	10.0649	0.0379807
Ubxn8	112.231	111.14	98.0541	124.318	94.3077	123.778	112.148	119.5	82.8077	89.8182	85.1667	127.4	0.121764	0.646119	10.0693	0.0768648
Zfp646	135	102	102.333	72.3333	100.125	117.75	136.077	92.1	135	80.7778	95.4444	82.8333	0.121731	0.646119	10.0701	0.148089
Zfp991	104.769	103.3	115	110.92	83.2857	114.032	86.4103	107.381	136.429	96.4706	89.6818	106.333	0.121888	0.646119	10.0663	0.0703936
Arhgap21	146.385	144.538	122.3	174.467	98.2143	96.2308	126.533	118.5	134.615	128.75	140.2	177	0.122645	0.647634	10.048	0.1256
Btaf1	130.867	188.867	108.6	136.043	149.438	157.04	140.45	134.786	144.5	175.9	146	114.111	0.122379	0.647634	10.0544	0.0897715
Cry1	95.8462	120.882	180	26	69	158.333	112.4	91	185.5	145.667	110.5	104.25	0.122608	0.647634	10.0489	0.23926
Fbxo31	109.333	135.286	91.8889	160.857	96.875	95.25	97.3	115.278	110.9	90.1333	109.588	150.333	0.122665	0.647634	10.0475	0.156993
Ndel1	121.971	101.894	133.868	133.745	117.328	117.833	116.701	99.3158	111.881	137.816	101.049	98.4286	0.122782	0.647634	10.0447	0.0266438
Nt5c	129.062	126.38	91.0517	96.0351	105.177	93.4474	104.783	85.7069	100.5	86.7174	99.386	121.706	0.122775	0.647634	10.0449	0.0265036
Prpf31	130.714	133	107.146	114.022	114.5	115.489	114.304	110.617	112.255	105.837	103.571	102.475	0.122561	0.647634	10.05	0.038213
Raly	91.4565	110.708	104.036	91.931	115.886	110.982	113.759	107.192	95.5873	97.3492	108.028	103.16	0.122581	0.647634	10.0495	0.0276086
Bod1l	83	177.526	161.071	130.294	133.5	126.357	164.722	148.727	122.571	202.2	140.077	89.25	0.122968	0.647794	10.0402	0.123953
Irf7	106.3	119.875	134.574	125.944	117.881	118.681	105.833	116.8	119.221	119.939	109.559	108.985	0.123032	0.647794	10.0387	0.00440874
Pls3	129.405	118.978	106.81	122	87.0625	94.6087	128.537	119.552	129.387	93.5588	116.118	171.615	0.123129	0.647794	10.0364	0.0520019
Pprc1	156.25	160.075	106.562	121.786	150.417	87.2	164.15	159.5	177.111	187	151.25	137.333	0.123157	0.647794	10.0357	0.0904117
Rpl39	84.3671	86.3488	89.8305	80.7155	84.8017	84.8978	87.4546	87.7982	85.0367	85.6751	82.372	87.2915	0.123096	0.647794	10.0372	0.00170962
2010008C14Rik	52.3333	145.2	136.5	127.125	61.875	70.3333	105	185	111.5	95.8889	87	76	0.123606	0.64842	10.0249	0.250623
Arpc1b	100.367	107.699	107.117	102.583	106.178	104.937	98.5929	100.836	97.4167	102.838	98.5509	101.318	0.123846	0.64842	10.0192	0.00216491
B230206L02Rik	152.5	69	127.571	180	154.667	91.75	100.25	123.889	122	99.5	65.2222	53.6	0.125138	0.64842	9.98848	0.277458
Dapp1	121.444	152	206.143	105.545	145.333	149	95.0833	93.3333	99.2	100.273	130.889	161.875	0.124159	0.64842	10.0117	0.143025
Dctn5	104.868	145.273	120.885	128.364	121.463	119.986	129.094	121.765	130.478	120.8	111.548	114.378	0.1241	0.64842	10.0131	0.0229659
Evi2a	103.258	110.839	119.414	121.815	118.752	113.84	116.874	111.22	123.915	117.083	120.527	107.366	0.123596	0.64842	10.0252	0.00756046
Ift20	105.139	102.357	142.957	109.109	108.95	130.391	95.1163	140.958	100.675	108.579	116.879	111.231	0.124154	0.64842	10.0118	0.0374975
Lmbrd2	113.522	106.441	133.55	148.8	159.972	165.409	128.846	117.042	139.158	135.281	116.75	122.545	0.125054	0.64842	9.99048	0.0580842
Mbd4	170.143	146.333	97.5	206.571	191.4	85	215	113.5		127.4	108.333	84.5	0.125343	0.64842	9.98363	0.344263
Mkrn1	92.64	98.4742	102.215	103.869	107.84	112.273	96.8643	100.825	94.6	101.28	98.6294	100.952	0.125153	0.64842	9.98812	0.0108097
Naip5	152.2	130	182.6	98.5625	195.909	179.167	193	166.111	218.375	187.286	135.875	147.5	0.124811	0.64842	9.99622	0.181749
Pfdn1	84.9677	103.987	96.087	84.9273	79.5606	80.4754	98.8696	95.5789	80.1628	93.6849	76.1695	100.462	0.124859	0.64842	9.99508	0.0267965
Phf6	95.3333	172.667	80.6667	143	113.4	66.5	155.222	99	161.6	92.875	88.9	51	0.124701	0.64842	9.99883	0.227246
Pigm	134.222	119.889	154.812	194.176	131.565	166.474	102.5	93.8261	81.4	147.9	128.882	169.25	0.124658	0.64842	9.99985	0.0909077
Ppp1r15b	90.5	106.143	132.5	128.894	100.755	113.895	104.87	103.406	120.257	116.912	124.844	101.438	0.123789	0.64842	10.0206	0.0410678
Ptprc	119.186	132.381	153.452	153.279	144.657	135.804	118.439	140.31	149.28	136.188	139.176	132.963	0.123918	0.64842	10.0175	0.0119114
Sec14l1	118.069	109.129	140.333	110.065	117.408	109.968	114.861	112.383	121.564	120.58	103.553	81.6765	0.124456	0.64842	10.0047	0.0257852
Sel1l	133.342	128.1	118.147	108.735	119.524	115.718	121.88	137.583	115.938	120.079	118.961	134.871	0.124946	0.64842	9.99303	0.0167108
Skiv2l	138.704	114.692	107.348	157.382	136.657	154.364	149.205	113.094	122.52	128.171	123.588	129.895	0.124374	0.64842	10.0066	0.053799
Slc12a2	107.909	119.545	223.6	102.333	98.6667	150.286	116.643	180	111.75	127.625	190	157.667	0.125261	0.64842	9.98558	0.237752
Snx11	94	131	108.5	149	96.68	125.9	126.464	130.773	150.368	129.833	184.909	129	0.124975	0.64842	9.99234	0.0832695
Src	118.5	95.303	151.95	106.389	106.074	131.457	115.125	111.917	95.4762	108.368	118.346	114	0.123678	0.64842	10.0232	0.0655111
Syf2	98.1961	91.25	102.723	113.435	122.91	114.556	101.315	106.018	110.12	111.082	95.1228	106.742	0.125042	0.64842	9.99074	0.0265006
Taf4	144.6	142	99.7895	154.375	133.8	169.429	147.773	167.917	123.214	148.846	126.556	93.6667	0.124636	0.64842	10.0004	0.136991
Thoc2l	243	213.571	191	141.167	154.333	295.667	250.5	171.75	257.75	370	178		0.125207	0.64842	9.98684	0.434211
Tmcc1	138.75	119.5	106.417	150.923	94.0769	154.125	133.455	105.545	108.214	109.5	121.571	85	0.12531	0.64842	9.98442	0.142635
Trir	127.863	115.667	107	108.402	113.175	112.143	112.259	111.258	118.565	112.912	115.312	107.171	0.124181	0.64842	10.0112	0.012514
Uba52	89.7619	90.9792	88.8945	85.3662	88.0541	91.3164	90.6105	89.2807	86.7016	84.5096	81.9438	87.1189	0.124695	0.64842	9.99898	0.00141248
Uba7	154.6	216.8	214.6	200.855	173.776	191	153.647	180.571	213.095	184.716	154.015	160.839	0.125044	0.64842	9.99072	0.0388744
Zfp346	154.167	145.455	197	172.857	177.833	127.6	122.3	162	144.333	127.222	197	102	0.124508	0.64842	10.0034	0.277873
Actr2	116.725	127.644	119.538	120.637	116.965	119.949	116.905	121.058	126.484	120.5	119.294	127.497	0.125655	0.648977	9.97626	0.00406365
Gm13431	131	199.333	186.5	281	145.4	133	132		321.333		105.5	171.5	0.125657	0.648977	9.97621	0.767401
Zdhhc9	99.8095	101.4	95.4	105.186	117.167	131.628	128.6	99.8	121.216	113.36	106.037	116.043	0.125619	0.648977	9.97711	0.0461903
Scaper	103	189	112.667	101.571	95.4444	155.375	129.111	90.4	111.2	120.429	145.333	85.5	0.125784	0.649275	9.97323	0.237458
Larp7	32	110.333	113.4	109.75	70.1429	125.5	114.9	88.9	85.3	115.133	98.1667	192	0.125956	0.649808	9.96917	0.191715
Ccnf	137.857	153.25	83.5	47	60	113.333	115.933	93.5	116.357	113.833			0.126098	0.649828	9.96583	0.301995
Rabggta	118.231	152.696	157.25	203.357	113.067	147.391	138.923	108	150	148.357	135.727	106	0.126056	0.649828	9.96683	0.0977141
Cd2ap	81.9583	132.964	139.25	136.5	119	112.029	149.529	127.556	128.043	94.6316	107.308	97	0.126516	0.650519	9.95602	0.0630128
Frrs1	174.225	137.598	118.309	132.288	143.333	137.14	134.531	119.758	125.163	121.057	111.667	130.875	0.12657	0.650519	9.95476	0.0312061
Plekha5	88	149	242.5	88	231	93.25	192.5	121.625	165.8	137.667	258	81	0.126385	0.650519	9.95911	0.58583
Slc35a1	135.769	114.158	100.538	99.2857	131.812	130.619	125.176	106.083	109.3	137.778	119.182	113	0.126522	0.650519	9.95588	0.0948179
Vma21	112.312	108.854	107.918	130.697	118.947	112.769	103.967	114.591	107.705	117	112.804	118.909	0.126647	0.650519	9.95295	0.0132177
Zc3h10	115.875	94.6316	117.824	115.55	124.176	138.308	121.462	64.625	122.043	127.583	92.1667	111.643	0.126579	0.650519	9.95456	0.100551
Pias4	106.19	105.24	154.762	125.1	120.429	102.818	128.25	108.708	155.176	118.476	114.105	136.556	0.126945	0.650816	9.94598	0.0857412
Snrpb	127.116	117.267	105.684	110.263	113.51	109.222	113.658	112.054	115.734	109.934	106.562	109.943	0.126919	0.650816	9.9466	0.00930458
Ssx2ip	122.333	154.25	115.4	134.333	143.4	49.8	111	190.75	137.5	71	62.4286	101	0.126982	0.650816	9.94513	0.320811
Tmem170b	110.636	53.7778	102.471	107.762	108.412	176.357	138.545	137.643	135.667	106.231	104.5	146.417	0.126966	0.650816	9.94549	0.111747
Tbce	137.286	187.318	205.286	164.182	205.067	146.3	168.92	173.4	174.667	190.125	169.7	79	0.12707	0.650916	9.94306	0.108077
Nup133	137.3	151.944	114.833	110.545	134	122	124.571	116.941	94.6923	80.3636	80	100.5	0.12722	0.651327	9.93957	0.139994
Inka1	101.625	166.8	100.263	99.25	110.2	89.76	101.812	77.2857	74.7857	115.462	93.0714	92.3	0.127442	0.652109	9.9344	0.0894991
Asnsd1	93.973	84.6333	106.667	116.197	116.706	95.0364	113.627	104.444	96.0192	99.3673	90.3966	111.818	0.127757	0.652452	9.92707	0.0323357
Chd8	118.08	131.929	137.182	163.88	105.609	107.767	106.189	117.8	117.783	145.1	120.125	84.5	0.127786	0.652452	9.92639	0.0689333
Irf2	129.769	118.289	124.034	138.758	105.77	131.472	116.621	100.267	98.0976	105.846	89.8974	102.778	0.12767	0.652452	9.9291	0.0377532
Ube4b	97.9412	105.261	135.882	136.977	150.909	139.154	101.405	103.25	133.5	145.333	127.731	154.846	0.127762	0.652452	9.92695	0.0583938
Chid1	106.808	98.2353	116.333	108.867	101.6	81.3548	87.4878	74.2258	92.8571	106.568	102.55	104.25	0.128053	0.652582	9.9202	0.0524878
Mrps18b	128.72	113.063	129.885	105.103	101.448	121	101.771	117.667	113.022	105.931	118.167	82.6842	0.128051	0.652582	9.92026	0.0455058
Pdp1	95.2222	113.704	124.923	143.333	133	109.88	92.3333	145.857	126.069	94.7143	95.25	116.375	0.127928	0.652582	9.92311	0.0400125
Usp11	74	178.333	221.5	101.125	199	229.167	144.5	98.6667		57.75	77	164.5	0.128089	0.652582	9.91936	0.381514
AI837181	102.281	140.189	119.379	104.5	125.404	128.121	113.659	105.478	119.789	101.543	106.878	144.483	0.129141	0.652773	9.89506	0.0369219
Bap1	125.75	154.429	135.241	109.875	114.429	104.647	116.833	122.647	106.935	120.29	120.526	121.375	0.129294	0.652773	9.89156	0.0543492
Gcc2	146.308	133.5	103.1	77.6667	178.692	155.833	123.75	114.333	111.333	88.0909	167.25	57.375	0.129156	0.652773	9.89474	0.135544
H1f10	43	92.3333	60.5	119.5	230	162	92.8571	110.125	130	108.429	70.5		0.129181	0.652773	9.89415	0.65961
Mapk14	99	122.415	124.957	128.936	115.762	135.8	111.643	121.553	116.961	123.333	114.62	119.675	0.129054	0.652773	9.89707	0.0224933
Osgep	85.6875	102.465	123.75	114.341	118.483	118.949	90.8537	88.2778	112.045	106.244	117.194	109.571	0.128266	0.652773	9.91527	0.0493297
Parl	89.3621	112.096	85.9375	109.426	82.717	103.576	103.191	100.483	99.907	121.033	101.127	89.875	0.128518	0.652773	9.90945	0.02768
Pira2	113.195	108.493	130.835	124.689	116.081	119.803	109.309	100.676	129.159	116.735	109.485	101.774	0.128858	0.652773	9.90159	0.0126457
Polr2l	116.969	113.098	102.923	102.047	117.768	108.358	109.459	113	105.524	108	111.089	105.714	0.128694	0.652773	9.90538	0.0217223
Ptpra	112.88	123.84	120.173	120.925	104.663	108.403	116.287	121.235	113.61	116.382	118.504	113.773	0.12827	0.652773	9.91518	0.00984625
R3hdm1	180.115	142.661	142.75	121.75	125.792	123.833	122.814	127.935	136.857	129.903	119.45	111.75	0.128424	0.652773	9.91161	0.0510908
Skil	129.688	124.342	134.426	172.762	157.852	123.1	111.772	124.629	138.805	149.5	166.762	136.5	0.129068	0.652773	9.89676	0.0328796
Tom1l2	97.3846	155.15	74.3333	132.067	197.444	107.357	90.6667	154.667	129.333	131.727	108.2	102.4	0.128674	0.652773	9.90584	0.123823
Ubap2l	107.672	119.537	123.819	122.272	111.706	145.674	113.452	109.237	111.743	108.937	106.163	122.902	0.129306	0.652773	9.89128	0.0174449
Vdac1	109.613	114.905	115.717	99.6404	113.442	113.037	114.493	112.978	111.011	116.288	105.975	123.2	0.129237	0.652773	9.89287	0.0103699
Wdr45b	140.964	149.6	139.086	137.781	137.976	113.027	149.268	124.216	130.441	120.452	125.167	101.55	0.129002	0.652773	9.89827	0.0414153
Zfp111	98.3333	66.25	110	111	90	131.667	150	102.5	103	76.75	107	101	0.128432	0.652773	9.91142	0.450519
Gpr31c	87	129.857	136.077	113.143	74.6667	77.3333	123.625	82	109.25	130.158	121.5	131	0.129565	0.653111	9.88533	0.170437
Iqsec2	105.538	108.2	120	134.517	152.714	121.786	120.318	121.308	161.074	130.542	107.087	160.727	0.129626	0.653111	9.88394	0.0654565
Syngr1	115.008	112.592	111.866	111.054	116.88	116.77	105.913	115.198	110.168	104.24	109.919	111.648	0.129605	0.653111	9.88441	0.00557811
Tagln	70.8824	92.7895	78.8276	53	103.778	98.5862	89.0857	83.9444	83.4211	62.1667	83.6957	86.9655	0.129651	0.653111	9.88336	0.0803526
Fcsk	75.5	87	249	54.6	210.667	71.25	83	167.333	155	124	206.333	24	0.130022	0.653264	9.87485	0.617178
Gm42031	152.522	147.4	142.366	164.263	180.105	149.474	142.488	149.195	119.623	141.246	143.333	109.8	0.129944	0.653264	9.87663	0.0224469
Mex3b	220	27	207.333	123	153.25	58	91.5556	145	226		127	68	0.129964	0.653264	9.87619	0.759707
Sec11c	109.938	120.508	115.965	108.357	107.474	109.661	115.87	121.506	114.449	102.812	117.083	114.754	0.130028	0.653264	9.87472	0.0106409
Spty2d1	113.778	140.214	129.333	155.154	93.4783	108	108.583	145.75	105.722	83.8333	122.333	103.9	0.130009	0.653264	9.87516	0.085871
1700037H04Rik	107.033	101.903	129.5	111.279	109.321	126.587	101.291	96.7949	122.393	122.304	120.659	106.214	0.131615	0.654304	9.83862	0.0291083
4833420G17Rik	179.143	149.143	77	267.875	281.4	183.4	228.143	198.833	124.625	165.471	178.733	188.333	0.131014	0.654304	9.85223	0.252621
Apmap	117.941	144.138	110.762	134.522	105.739	136.8	139.344	122.038	109.062	117.19	119.4	127.2	0.131584	0.654304	9.83931	0.0697824
Atf4	127.216	126.427	147.752	132.122	133.558	133.195	128.058	111.018	139.566	128.013	127.179	124.592	0.130718	0.654304	9.85897	0.00979044
Bcl2l11	124.406	147.742	102.696	127.371	116.966	134.667	108.773	110.576	119.277	135.962	122.159	124.8	0.131934	0.654304	9.8314	0.0223441
Bscl2	99.1852	92.68	116.732	110.658	113.9	107.941	97.3784	103.069	110.793	114.125	112.645	99.08	0.13048	0.654304	9.8644	0.0228343
Bzw2	157.182	114.55	68.5833	161	142	162.6	98.5714	111.619	120.857	165.9	135	120.667	0.130609	0.654304	9.86144	0.140878
Cpsf3	117.63	139.083	112.515	113.429	144.567	89.4375	122.769	129.347	111.735	117.175	100.242	105.6	0.132091	0.654304	9.82787	0.0531236
Dcps	142.9	113.958	123.607	79.2	131.346	104	95.2143	136.85	92.9286	122.095	108.182	193.375	0.1321	0.654304	9.82765	0.0832851
Dnajb6	114.831	121.027	99.5	107.116	112.893	112.204	109.568	110.329	102.301	120.385	102.492	114.815	0.131273	0.654304	9.84635	0.0119205
Eapp	95.2	121.286	111.778	89.6944	109	113.156	94.9302	87.875	88.2667	110.925	100.244	101.045	0.131052	0.654304	9.85138	0.0485289
Galnt6	133.023	135.337	137.972	117	129.641	120.02	116.642	117.7	109.214	129.857	128.63	111.611	0.130652	0.654304	9.86047	0.0324358
Gm12166	186.48	133.722	91.6667	178.548	162.13	137.136	158.611	134.55	161.842	149.526	174.583	130.286	0.132126	0.654304	9.82708	0.0668509
Gm9803	96.4444	125.565	101.652	116.833	97.2778	88.4211	129.391	118.037	108	115.15	100.19	100.375	0.131374	0.654304	9.84406	0.0878934
Ifi44l	121.923	196	152.528	164.338	153.17	142.33				244			0.132176	0.654304	9.82593	0.0108935
Ift140	105.4	143.091	50.75	123.3	141.625	54.75	117	150.25	105.714	114.667	67	136	0.13165	0.654304	9.83782	0.265887
Nap1l1	113.287	124.23	129.028	102.5	121.453	117.506	111.352	116.758	111.697	116.7	119.257	115.652	0.132182	0.654304	9.82581	0.0144285
Phf3	114	122.04	145.5	84.8696	106.152	84.8462	104.556	123.545	116.75	121.235	140.185	89.5714	0.131477	0.654304	9.84174	0.0688234
Pold2	77	135.333	53.8571	86.3571	81	92.8889	86.875	83	82.875	69.3846	77.8	112	0.131765	0.654304	9.83522	0.156115
Prelid2	48.5	85.3636	176.5	94.5	118.333	95	81.125	94.8333	97.4444	133.25	94.5	108.5	0.131246	0.654304	9.84697	0.228999
Psme1	95.6024	110.589	116.074	110.824	108.287	107.379	108.946	108.712	112.617	117.768	109.282	118.643	0.131905	0.654304	9.83206	0.00724544
Slfn5	129.547	135.368	126.801	129.12	129.115	114.391	117.284	134.372	120.987	121.666	117.989	110.514	0.130547	0.654304	9.86287	0.00668216
Smndc1	104.485	146.053	117.724	99.0294	106.279	131.167	116.897	123.818	115.947	127.69	112.233	108.417	0.131255	0.654304	9.84676	0.0460129
Tlr3	151.667	45	124.5	111.086	142.471	125.55	117.667	114.25	135.538	96.2857	97.0952	82.5	0.131227	0.654304	9.8474	0.0965431
Trp53	136.355	137.947	123.5	114.447	144.31	151.553	162.243	125.062	127.025	117.698	134.178	122.056	0.131795	0.654304	9.83455	0.0394962
Ttc27	180.5	123.857	73	97.5	90.6	134.222	94.875	127	94.7778	91.1429	127.25	69	0.13115	0.654304	9.84915	0.22905
Zdhhc2	54.6667	105.667	90	159.333	130.8	63	121.4	107.6	120.333	81	82	74	0.131652	0.654304	9.83777	0.447171
Zfp644	169.562	151.957	107.857	97.2857	140.364	130.125	125.429	111.8	134.4	126.2	106.562	139.857	0.130887	0.654304	9.85512	0.114594
Ythdc2	259.6	97	85	129.8	97.5	159.429	113.667	85.4286	131	133.667	105.25		0.132334	0.654711	9.82239	0.392895
Gps1	150.278	126.107	110.804	134.521	111.824	114.167	114.765	117.918	122.463	116.452	116.125	104.964	0.132429	0.654839	9.82024	0.0287142
Bcl2l2	182.944	136.76	127.333	113.125	180.273	188.538	158.444	189	204.385	199.375	104	127.429	0.132998	0.654919	9.80747	0.0934045
Capza2	118.279	117.33	118.564	120.13	111.523	114.193	114.758	114.026	119.652	116.201	116.206	109.289	0.133002	0.654919	9.80737	0.00402932
Ece1	124.316	116.452	101.36	111.676	133.818	88.4444	93.5152	128.81	118.038	109.069	105.889	113.65	0.13285	0.654919	9.81077	0.0594592
Gm5547	204.417	98.125	135.667	130.154	150.867	123.375	83.4545	114.077	169.625	135.692	132.083	232.5	0.132739	0.654919	9.81327	0.163555
Gm7336	87.8542	92.6545	96	90.3529	92.4815	93.8529	107.75	75.94	102.848	86.5067	93.3235	70.6316	0.132778	0.654919	9.81241	0.041578
Hnrnpa2b1	124.793	148.189	132.657	140.615	160.139	140.463	129.229	125.134	126.82	138.855	146.538	139.023	0.132926	0.654919	9.80908	0.00591978
Slc66a2	113.84	125.104	131.019	131.261	104.523	129.327	124.078	129.184	108.725	115.164	120.051	100.412	0.132686	0.654919	9.81445	0.0244749
Tdrd3	91.75	81.3846	106.538	125.333	61	77.2	93.8333	102.818	87.4167	91.2857	95	173.25	0.132551	0.654919	9.8175	0.1785
Acadm	125.057	104.643	125.41	143.054	112.05	135.465	92	105.647	114.795	144.818	113.889	144.9	0.133179	0.65506	9.80341	0.0368549
Hspbap1	212.25	132.5	107.5	83.8	67.2857	170.75	59.8333	208.5	114	42.6667	127	103.6	0.133135	0.65506	9.8044	0.408516
Pex11g	234	39.3333	128.667	172.333	186.5	304		99.75	200.5	140	101.5		0.13324	0.65506	9.80204	0.612628
Actn4	100.039	115.782	103.066	94.696	105.832	101.315	97.651	106.839	107.146	103.818	102.779	99.2462	0.134076	0.655189	9.78338	0.0125267
Alg12	53.8571	141.5	175.333	141.538	135.7	101	128.308	154.667	113	113.125	78.5833	114.167	0.134541	0.655189	9.77304	0.15763
Atg3	121.841	132.621	116.552	122.788	113.012	126.944	122.395	101.962	116.214	109.662	97.2203	90.8286	0.133982	0.655189	9.78547	0.0225992
Cdv3	105.818	126.817	111.956	103.557	115.935	110.364	116.519	110.805	100.41	112.256	109.138	105.643	0.134515	0.655189	9.77361	0.0186876
Gcn1	142.375	180.568	132.474	108.182	139.69	152.156	118.5	126.929	156.175	131.5	123.333	122.167	0.134613	0.655189	9.77145	0.0588641
Grb2	111.825	113.358	122.171	116.481	112.856	103.828	102.249	102.205	114.302	103.695	103.562	98.28	0.133653	0.655189	9.79281	0.00579113
Hddc2	103.583	88.3077	87.1429	57.1111	80.625	132.4	113.923	87.1875	110.5	103.733	74	94.8	0.134296	0.655189	9.77848	0.162975
Hspa9	118.43	115.884	113.006	106.137	107.702	112.055	112.88	117.254	109.857	108.386	116.304	114.069	0.134728	0.655189	9.76889	0.00971063
Hspb11	84.1667	106.947	70.1333	122.154	100.5	92.8571	91.8333	117.588	102.267	111.682	102.762	92.3333	0.1342	0.655189	9.78062	0.122258
Ifi211	105.211	126.373	116.063	121.787	109.434	111.667	144.75	141.667	94.4286	135.8	148.929	120.125	0.134273	0.655189	9.77898	0.00811534
Napa	136.59	137.298	116.577	121.615	119.916	118.24	118.307	121.629	129.969	114.181	116.765	108.675	0.134721	0.655189	9.76905	0.0113068
Ndrg1	98.6744	100.165	110.425	107.707	109.269	123.211	91.9189	104.259	120.786	120.509	111.286	97.2	0.133338	0.655189	9.79985	0.0244385
Pip5k1c	115.727	111.656	113.45	111.929	116.263	116.991	122.474	112.288	104.925	104.846	126.183	101.667	0.134341	0.655189	9.77748	0.01381
Pla2g7	96.1875	111.567	115.474	122.395	136.25	109.721	126.5	84.0833	128.5	117.25	90.6667	92.8889	0.133794	0.655189	9.78966	0.0556231
Rad52	73	133.2	223.5	220	184.667	120.429	130	215.8	136.875	93.625	121.667	126.667	0.133536	0.655189	9.79543	0.425888
Rap1a	117.324	122.096	120.411	101.059	125.991	118.874	114.929	108.566	124.241	119.407	113.75	109.567	0.134666	0.655189	9.77027	0.0145175
Spsb2	93.6757	92.8	105.469	102.619	106.936	111.719	113.154	85.3636	115.091	95.9677	107.722	89	0.134173	0.655189	9.78122	0.0319648
Trp53inp1	136.154	132.486	122.128	135.625	118.506	104.217	115.935	133.229	135.077	127.772	140.575	125.188	0.134718	0.655189	9.76912	0.0258442
Tubgcp4	166.438	186.394	130.4	196	118.211	180.565	157.435	111.13	132.292	151.7	88.9286	126.143	0.134623	0.655189	9.77123	0.0751633
Wasl	97.2308	180	143.75	136.538	180.571	130.476	112.947	115.875	119.1	127.6	138.2	104.7	0.13412	0.655189	9.78239	0.108693
Zfp638	189.933	158.733	105.048	127.312	134.793	102.688	149.6	136.818	160.696	97.0435	150.652	138.143	0.134046	0.655189	9.78405	0.0843453
Dennd4b	138.741	128.781	160	160.326	122.787	117.939	130	155.897	153.167	133.917	162.579	136.875	0.134803	0.655214	9.76724	0.0408671
Fis1	113.574	110.426	121.805	122.253	117.943	130.758	120.188	117.252	122.994	119.619	117.398	125.152	0.134874	0.655223	9.76565	0.010345
Ap1s2	140.364	124.888	159.879	135.6	143.706	141.824	150.736	129.308	137.063	127.906	113.909	147.615	0.135928	0.655536	9.7424	0.0270622
Eif4a1	111.067	112.602	106.652	110.662	105.497	108.464	108.277	109.959	105.953	106.279	107.358	99.8496	0.136001	0.655536	9.74079	0.00239508
Eng	106.686	97.2593	110.833	118.459	99.2093	103.549	102.441	109.333	118.981	115.169	99	110.513	0.135749	0.655536	9.74633	0.019415
Faim	111.081	133.298	109.031	91.913	108.514	103.122	119.891	109.286	115.348	121.273	101.647	115.81	0.135856	0.655536	9.74398	0.0399343
Gatd3a	112.9	111.658	127.296	128	106.424	126.903	117.366	120.29	146.059	106.212	124.941	118.867	0.136193	0.655536	9.73658	0.0489275
Gltp	91.6766	95.9201	110.468	102.212	99.0752	100.48	90.1325	97.641	101.235	100.937	99.3134	97.989	0.135869	0.655536	9.74369	0.0057014
Klhdc4	110.6	142.286	122.833	68.5	116.056	133.429	122.278	113.467	126.833	109.529	151.444	112.2	0.135711	0.655536	9.74716	0.120335
Lemd3	81.6	127.9	164.714	108.889	137.182	152.786	114.625	124.5	116.833	153.8	126.625	98.3333	0.136055	0.655536	9.73959	0.137177
Nav1	125.788	103.139	108.419	116	100.227	140	126.561	117.08	136.773	148.875	130.962	101.818	0.135212	0.655536	9.75819	0.05109
Ogfod3	113.667	120.8	113.6	119.5	125.273	122.875	96.1111	136.667	113	76.25	101.143	128	0.135967	0.655536	9.74153	0.183802
Plxna1	138.83	132.523	136.125	117.664	133.705	127.48	121.438	130.578	133.884	127.962	141.631	111.864	0.136189	0.655536	9.73666	0.0120952
Slc25a37	243.333	206.355	221.435	247.143	294.55	200.095	244.357	199.138	247.25	250.188	179.917	248.375	0.13593	0.655536	9.74234	0.0705967
Snora73b	3.89231	4.5	4.81752	4.69565	4.20382	4.05674	6.80822	3.95455	4.38938	4.70588	3.57803	4.42857	0.135283	0.655536	9.75662	0.0104797
Spsb3	126.357	105.84	73.9091	129.857	126.826	104.143	125.769	116.667	99.9	122.824	134.04	85.2727	0.1356	0.655536	9.74962	0.0799149
Tle6	193.5	84.8333	88	133.214	170.333	102.467	132	68.5	144.571	105.125	128.667	132.75	0.135611	0.655536	9.74938	0.203112
Tnfsf12	131.356	119.038	110.837	116.639	125.242	110.535	99.0305	107.287	127.556	118.436	109.102	107.254	0.135372	0.655536	9.75464	0.0104889
Ttll5	45	122.333	94	87	87.75	133.5	102	120.5	93.5	63.3333	180.5	78	0.135463	0.655536	9.75263	0.541813
Ube2f	118.143	115.97	120.8	134.368	99.3696	114.912	100.299	115.435	101.273	118.021	117.316	135.944	0.135247	0.655536	9.7574	0.0293897
Kin	163.778	105.5	144.667	176.727	182.9	194.25	121	103	175.25	162.5	135.4	110.2	0.136535	0.655914	9.72906	0.221115
N4bp2l1	158.917	138.526	151.714	163.967	107.333	127.64	128.19	137.857	133.143	142.346	130.367	100.5	0.136474	0.655914	9.7304	0.0726149
Psmc5	96.7973	110.391	98.8317	98.9804	87.8151	100.183	104.381	106.393	103.741	86.9806	85.7625	89.5111	0.136405	0.655914	9.73192	0.0151588
Smg8	125.25	124.7	75.5714	138.222	100.143	86	122.529	114.286	70.1111	120.909	67	94.2222	0.13655	0.655914	9.72874	0.105747
Fam98a	134.167	154.235	172	111	110.583	82.6667	153.654	119.625	112.8	148.545	76.3846	102.8	0.136721	0.6564	9.725	0.117169
Gorasp1	146.125	157.545	99.3462	119.1	99.1739	144.5	146.25	106.857	136.154	140.7	124.2	108.4	0.136808	0.656485	9.72309	0.0771673
Adck2	87.6667	194.125	108.333	131.278	105.538	126.462	102.944	144.833	123.375	151.917	92.05	177.833	0.136899	0.656585	9.7211	0.149555
Nck2	167.727	133.412	98.7647	118.13	140.591	116	82.7857	138	128.167	119.944	130.875	131.6	0.137111	0.656932	9.71647	0.0875358
Traf2	111.462	114.571	190.333	109.6	111.909	138.5	91.2857	122.706	118.846	127.667	104.769	126.364	0.137052	0.656932	9.71776	0.102292
Bola1	93.7692	82.6111	111.4	103.667	91.5789	123.688	89	123.042	95	107.235	94.8621	120.875	0.137326	0.656999	9.71179	0.089924
Ddx60	144.556	157	183.4	199.481	173.75	173.541	157.889	199	145.792	156.627	187.296	149.167	0.13764	0.656999	9.70495	0.0577676
Fam102a	97.5263	111.111	152.467	130.231	113.625	121.6	93.8293	116.034	121.5	91.4444	88.9286	124	0.137687	0.656999	9.70392	0.107821
Gmpr2	103.212	127.606	96.1316	131.697	111.024	126.389	91.7273	95.963	127.515	89.5161	118.514	95.4167	0.137722	0.656999	9.70315	0.044922
Kcnj2	139.545	171.786	141.5	74.75	147.375	96.625	139.476	134.059	145.625	82.7143	135.455	131.5	0.137301	0.656999	9.71234	0.127794
Rnf146	101.3	143.786	134.652	105.96	110.409	120.917	104.087	114.68	103.688	106	67.5385	85.6429	0.137425	0.656999	9.70963	0.0634616
Sirt7	180.361	180.587	150.205	178.213	163.214	146.211	156.811	153.892	181.4	143.054	150.915	144.741	0.137519	0.656999	9.70759	0.0312141
Tab3	0	124.5	47.6	171	88.8889	139.857	157.6	97	136.25	101.167	143.5	56.8	0.137505	0.656999	9.70789	0.294179
Zscan2	175	79	111.5	109.25	197.5	137	141		162	139	192	69	0.137753	0.656999	9.70248	0.80854
Prcc	123.846	114.042	119.062	146.294	119.059	100.588	138.12	135.25	158.722	101.231	142.077	105.333	0.138106	0.658348	9.69482	0.0914606
Gtpbp8	183	123.048	149.647	139.667	110.968	87.5294	103.318	105.688	161.786	101.143	115.625	122.833	0.138178	0.658355	9.69327	0.091446
Ccdc59	131.429	145.887	130.581	103.898	131.048	137.023	146.205	121.667	131.655	123.167	122.351	110.038	0.138978	0.659164	9.67597	0.0359701
Csrnp1	66.5	51.25	151	41.6667	246.25	100.4	72.8333	104	180	104.625	124.833	131	0.138701	0.659164	9.68194	0.33386
Gmip	146.944	161.73	148.033	128.023	138.143	114.625	128.31	143.611	128.176	138.667	160.381	155.304	0.138892	0.659164	9.67782	0.0443937
Pdhb	135.922	136.532	132.571	121.196	133.49	125.865	132.365	126.047	134.162	120.322	117.356	114.769	0.138505	0.659164	9.68618	0.0269061
Slc25a17	116.148	147.333	179.692	150.533	153.75	108.897	138.586	100.405	96.5385	119.333	144.903	86.6	0.138464	0.659164	9.68708	0.0541177
Smim20	110.882	105.55	136.862	105.647	148.793	123.156	121.432	119.6	123.409	131.548	101.968	128.762	0.138781	0.659164	9.68021	0.0514905
Stmn1	108.36	102.72	125.836	107.72	128.618	110.957	121.67	118.862	101.103	115.485	99.1071	115.286	0.138659	0.659164	9.68286	0.0231094
Supt7l	123.4	95.8462	131.667	149.667	72.7778	121.588	94.25	98.8	137	89	147.182	62.2	0.138916	0.659164	9.6773	0.153608
Utp20	124.375	131.267	125.75	223.286	172.5	111	155.5	141.091	145.333	152.857	116.857	191	0.138884	0.659164	9.67798	0.175963
Gm15446	229	85.5	100.667	261.667	184.5	190	241.222	209	208.833		109.667	83	0.139682	0.662073	9.66082	0.568283
Kif1b	120.222	133.533	112.207	149.8	105.615	130.621	127.048	99.25	140	143.976	122.543	126.042	0.139732	0.662073	9.65974	0.0370105
Fam78b	183	117.923	176.556	48	173.5	172.2	71.7778	129.833	132.286	21.5	27	81	0.1404	0.663904	9.64542	0.260687
Gm44751	96	158.333	133	84	231	149.5	96	118.333	111.333		107	128.5	0.140263	0.663904	9.64835	0.804029
Gtf2h5	103	116.814	103.188	117.033	126.125	108.231	106.194	114.533	100.986	113.133	116.326	96.8214	0.140316	0.663904	9.64722	0.0254544
Lrrc8c	42.3	96.5882	86.1667	121.857	75	62	110.792	76.75	81.5	114.25	98.4286	103.778	0.140377	0.663904	9.64592	0.189136
Atg4a	161.176	167.24	111.125	140.591	110.938	87.6667	99.6667	108	90.7	123.4	93.0769	101.6	0.140539	0.664226	9.64245	0.103682
Snapc4	228.8	124.2	180	142	130.143	192.125	190.083	104	194.333	191.75	150.167	253.333	0.140709	0.664694	9.63883	0.31093
Chchd4	113.333	128.083	99.303	104.3	91.9091	121.75	112.087	110.206	108.5	130.529	77.05	64.8571	0.141003	0.665592	9.63256	0.0587351
Ldhb	123.417	88.1667	130.2	119.667	76.75	35.5	123	130.455	122.857	113.857	83.8	126.833	0.141068	0.665592	9.63118	0.291854
Mrgbp	127.533	216.6	191.619	157.385	186.846	161.294	200.1	149.684	198.4	171.105	178.5	178.625	0.141111	0.665592	9.63026	0.0972753
Rnf44	147.962	126.944	114.635	132.351	124.557	120.708	137.171	142.875	151.163	122.352	133.647	114.974	0.141242	0.665873	9.62748	0.0235391
Zfp706	109.318	128.755	117.93	131.188	126.323	126.743	119.677	120.298	116.29	119.905	115.222	111.147	0.141543	0.666962	9.62107	0.0131976
Ankrd16	188.444	255.733	268.667	255.056	274	164.133	182.556	230.2	141	258	194.571	241.25	0.141627	0.667022	9.6193	0.13941
H2-Q4	107	151.44	162.1	121.225	136.337	117.747	147	125.909	198.455	143.091	120.042	123.957	0.14171	0.66708	9.61753	0.0389374
Tgfbr1	115.763	134.8	128.7	122.892	115.279	114.034	119.667	132.4	120.562	117.577	133.694	99.0513	0.14184	0.667355	9.61479	0.0187789
AC120557.1	140.667	118.711	126.071	113.688	108.615	125.167	113.455	102.091	147.652	111.532	121.615	111.056	0.142072	0.667448	9.60987	0.0485347
Rnf11	121.161	121.583	106.581	115.795	122.638	135.378	127.172	118.266	107.423	111.189	120.787	121.607	0.142011	0.667448	9.61116	0.0243938
Tmem181a	164.917	159.636	124.405	153.292	130.829	136.44	170.111	178.857	161.185	170.333	141.118	158.786	0.14198	0.667448	9.61181	0.0403858
Zfp362	96.1538	110.5	93.7059	80.6875	136.154	107.588	91.2941	98.5333	129.111	116	118.35	100.625	0.142217	0.667795	9.60681	0.1022
1110059G10Rik	162.36	125.452	115.765	113.872	108.697	122.227	125	137.435	141.474	107.367	125.875	93.5	0.142796	0.668063	9.59458	0.0551413
Cd81	113.467	107.782	109.945	111.766	120.724	115.53	116.354	109.764	104.609	115.31	116.668	113.066	0.142612	0.668063	9.59847	0.00585987
Cwc22	199.5	110.25	163	113.167	140.4	86.5714	49	74.5	63.3846	132.091	135.2	103	0.142913	0.668063	9.59212	0.223073
Hus1	174	54.5	132.5	58.6	69	106.25	190.667	107.5	197	125	150.4	149	0.142639	0.668063	9.59789	0.533216
Nus1	111.013	119.524	101.323	101.34	124.361	105.327	85.3947	106.144	103.872	108.586	104.37	91.3696	0.142379	0.668063	9.60338	0.0162219
Pak1	120.2	83.1667	128.818	104.458	92.2812	111.5	99.05	101.062	135.462	67.9524	97.3333	98.8333	0.142481	0.668063	9.60124	0.071651
[truncated: 16,685 more rows]
