# Supplementary material for: SARS-CoV-2 mRNA vaccine is re-adenylated in vivo, enhancing antigen production and immune response
Source: bioRxiv preprint, doi:10.1101/2022.12.01.518149, version 2 (2022-12-16)
Supplement: Supplementary Table 8 [file 518149_file13.xlsx]

## Sheet: Supplementary Table 8
gene	baseMean	log2FoldChange	lfcSE	stat	p. value	adjusted p. value	BMDM_AC_0h_1	BMDM_AC_4h_1	BMDM_AC_12h_1	BMDM_AC_24h_1	BMDM_AC_48h_1	BMDM_AC_72h_1	BMDM_AC_0h_2	BMDM_AC_4h_2	BMDM_AC_12h_2	BMDM_AC_24h_2	BMDM_AC_48h_2	BMDM_AC_72h_2	WT BMDMs cluster
Pf4	162.942	-0.811834	0.167553	256.738	1.96882e-53	1.66621e-49	418.893	465.366	241.037	88.1215	38.0013	29.4923	197.707	247.899	115.226	53.222	26.779	33.5631	4
Isg15	118.939	-0.93793	0.241405	237.39	2.78603e-49	1.17891e-45	8.84418	10.7265	119.818	400.552	195.548	173.021	5.25466	2.52958	34.5677	142.527	199.625	134.253	2
Irf7	91.6989	-0.847973	0.249799	229.532	1.34711e-47	3.8002e-44	5.62812	9.07629	67.266	210.691	223.258	149.427	3.28416	3.37278	21.6048	77.5778	142.415	186.786	2
Ifitm3	304.296	-0.899145	0.167386	202.251	9.37253e-42	1.98299e-38	92.4619	101.489	199.696	619.254	750.526	589.845	68.9675	65.7691	61.9338	215.594	497.845	388.165	2
B2m	1749.2	-0.351179	0.101315	184.337	6.33744e-38	1.07268e-34	1017.89	1247.58	1258.44	1986.74	3209.53	2845.02	765.867	909.807	953.493	1375.65	2690.07	2730.29	1
Ly6e	666.897	-0.386136	0.129787	175.822	4.17492e-36	5.88872e-33	341.707	304.468	460.352	982.154	1318.96	1034.2	300.173	236.094	246.295	618.819	1094.29	1065.26	2
Ifi203	92.4212	-0.45225	0.212936	170.889	4.71329e-35	5.69837e-32	16.8844	16.5023	105.804	201.077	169.422	106.172	9.19566	10.9615	47.5306	118.171	164.325	143.008	2
H2-K1	490.116	-0.491189	0.130455	167.048	3.11089e-34	3.29093e-31	242.009	315.195	322.316	538.342	1015.74	943.752	199.02	195.621	244.855	285.956	654.867	923.716	1
H2-T23	119.697	-0.578662	0.212701	160.667	7.13492e-33	6.7092e-30	39.3968	23.1033	58.1571	217.9	272.343	216.277	24.9597	21.923	31.6871	65.851	245.88	218.89	1
Ifi27l2a	285.816	-0.614663	0.16002	159.236	1.43975e-32	1.21846e-29	130.251	147.696	147.144	493.48	680.857	420.756	96.5544	80.1034	82.0984	222.811	447.939	480.099	2
Oas3	65.5627	-0.496808	0.216731	157.155	3.99695e-32	3.07511e-29	13.6683	11.5516	56.7557	144.199	122.713	104.206	11.1662	10.1183	18.7242	105.542	110.768	77.3411	2
Oasl2	76.6334	-0.688424	0.256548	145.384	1.28153e-29	9.03799e-27	12.8643	9.90141	106.505	142.597	151.214	104.206	7.22516	2.52958	27.3661	90.2068	135.112	129.875	2
Rnf213	76.0094	-0.417118	0.228034	141.117	1.03568e-28	6.74228e-26	12.0603	17.3275	93.8922	171.436	96.5866	110.104	8.53883	9.27514	36.0081	118.171	127.809	110.904	2
Ifi44	30.3884	-1.26233	0.35688	137.183	7.10189e-28	4.29309e-25	0	3.30047	16.8165	90.5248	79.9611	57.0184	1.31367	0	1.44032	22.5517	45.0373	46.6965	2
Rtp4	89.2578	-0.721268	0.242344	135.544	1.58282e-27	8.93025e-25	24.9245	17.3275	107.205	136.989	172.589	139.597	9.85249	2.52958	43.2097	85.6964	169.194	161.979	2
Ifi204	77.2971	-0.664461	0.212358	133.549	4.1999e-27	2.22148e-24	12.8643	23.1033	112.11	187.458	118.754	112.071	10.5093	14.3343	36.0081	103.738	104.681	91.9338	2
H2-D1	1017.87	-0.168683	0.116897	131.624	1.07626e-26	5.35785e-24	643.213	708.776	655.143	997.375	1765.48	1537.53	585.895	546.39	589.092	703.613	1621.34	1860.56	1
Oas1a	86.0438	-0.550053	0.203167	128.719	4.45007e-26	1.88305e-23	22.5125	26.4037	86.8853	194.668	154.38	116.003	18.3913	16.0207	31.6871	112.758	122.94	129.875	2
Hspa5	226.025	-0.044493	0.132781	128.843	4.18951e-26	1.88305e-23	134.271	167.499	533.223	276.381	139.338	143.529	135.964	158.521	423.455	331.961	141.198	126.956	4
Ifi202b	132.81	-0.455906	0.172587	128.818	4.23924e-26	1.88305e-23	42.6129	57.7582	146.444	249.144	186.84	210.378	31.528	32.8846	66.2548	178.609	189.887	201.379
Lgals3bp	114.418	-0.461046	0.169324	127.308	8.86469e-26	3.57247e-23	49.045	51.9824	86.8853	177.845	193.173	210.378	37.4395	30.355	41.7693	120.877	185.018	188.245	2
Usp18	41.3182	-0.887347	0.308298	122.724	8.30878e-25	3.19624e-22	2.41205	4.9507	71.4702	96.9337	68.8774	64.883	1.9705	1.68639	10.0823	70.3613	43.8201	58.3707	2
Zbp1	48.0825	-0.759765	0.291493	119.742	3.55865e-24	1.30943e-21	4.8241	9.07629	45.5447	99.337	91.0448	88.4768	5.25466	1.68639	10.0823	43.2993	93.7264	84.6375	2
Gm21188	48.8302	-0.334117	0.228933	115.836	2.38942e-23	8.42569e-21	16.0803	14.027	25.9255	65.6906	105.295	86.5106	12.4798	10.9615	12.9629	46.0055	79.1197	110.904	1
Ube2l6	61.7258	-0.479915	0.216903	114.535	4.50427e-23	1.52479e-20	16.0803	14.8521	54.6537	157.818	115.587	78.646	15.764	13.4911	25.9258	83.8923	77.9024	86.0967	2
Slfn2	219.657	-0.379386	0.172094	112.878	1.00947e-22	3.28583e-20	46.633	172.449	188.485	370.911	376.055	308.686	56.4876	98.6537	92.1806	216.496	390.729	318.12	2
Ms4a6b	62.5659	-0.737699	0.232192	110.347	3.46087e-22	1.08479e-19	20.1004	22.2782	30.8303	124.171	144.088	117.969	16.4208	14.3343	12.9629	37.8868	104.681	105.067	2
Ifi47	53.2663	-0.953087	0.274928	109.652	4.85387e-22	1.46708e-19	6.43213	13.2019	70.7695	134.586	101.337	80.6122	5.9115	3.37278	15.8435	48.7117	91.2919	67.1263	2
Parp14	56.9556	-0.757199	0.23459	108.678	7.79626e-22	2.27516e-19	9.6482	25.5786	75.6743	114.558	105.295	80.6122	5.25466	8.43194	28.8064	65.851	79.1197	84.6375	2
Bst2	312.95	-0.549931	0.149334	103.406	1.01138e-20	2.85311e-18	150.351	166.674	264.86	643.287	590.604	432.553	139.249	117.204	141.152	294.074	412.639	402.758	2
Gm36161	28.3076	-0.921729	0.328271	100.721	3.72525e-20	1.01699e-17	6.43213	8.25117	12.6124	34.4475	62.5438	80.6122	3.28416	0	5.76129	18.9434	35.2995	71.5041	1
Igtp	25.713	-0.759278	0.320617	100.498	4.15104e-20	1.09782e-17	1.60803	4.12559	32.2316	55.2762	56.2103	39.323	1.9705	0.843194	8.64193	33.3765	41.3857	33.5631	2
Selenop	393.962	0.180048	0.132713	99.6145	6.37245e-20	1.63424e-17	321.607	273.939	211.608	254.751	565.269	485.639	310.025	278.254	205.966	245.362	855.71	719.418	1
H2-T22	57.6435	-0.625888	0.227497	98.9729	8.69971e-20	2.16546e-17	15.2763	23.9284	53.953	101.74	110.045	96.3414	11.1662	10.1183	24.4855	47.8096	103.464	93.3931	2
Mx1	25.6837	-1.24367	0.378567	98.7723	9.58862e-20	2.31853e-17	0.804017	4.12559	37.8371	100.939	49.8767	19.6615	0.656833	0	5.76129	34.2786	27.9962	26.2668	2
Irgm1	80.4219	-0.535605	0.20703	97.2901	1.96777e-19	4.6259e-17	28.1406	25.5786	87.586	179.447	127.463	116.003	25.6165	16.0207	31.6871	95.6192	125.374	106.526	2
Iigp1	24.1007	-0.574806	0.402634	97.0769	2.18204e-19	4.99097e-17	1.60803	0	27.3268	80.9116	34.8345	23.5938	0.656833	0.843194	2.88064	36.9848	40.1684	39.4002	2
Slfn5	78.1885	-0.194563	0.226474	92.6309	1.88101e-18	4.18921e-16	20.9044	14.8521	85.4839	192.265	135.38	70.7814	25.6165	21.0799	37.4484	106.444	122.94	105.067	2
Ccnd1	114.474	-0.565971	0.187017	91.9552	2.60885e-18	5.6612e-16	214.672	173.275	188.485	122.569	50.6684	49.1538	132.68	170.325	108.024	119.073	17.0412	27.7261	4
Tapbp	128.148	-0.531252	0.167375	91.0721	4.00011e-18	8.46323e-16	62.7133	72.6103	126.825	222.707	222.466	174.987	39.41	39.6301	76.3371	122.681	193.539	183.868	2
Xaf1	42.6654	-0.852887	0.281793	87.8444	1.90527e-17	3.93276e-15	12.0603	13.2019	47.6468	76.1049	72.0441	82.5783	3.28416	2.52958	18.7242	45.1034	80.3369	58.3707	2
Plin2	407.883	0.090336	0.132622	85.6773	5.42796e-17	1.09373e-14	224.321	193.077	274.67	390.939	630.188	721.577	283.752	290.059	289.505	361.729	497.845	736.93	1
Gbp2	36.7011	-0.964082	0.321753	84.6602	8.86978e-17	1.74562e-14	7.23615	6.60094	39.2385	137.79	61.7521	37.3569	2.62733	5.05916	10.0823	33.3765	65.7302	33.5631	2
Plau	29.4424	0.814164	0.303098	84.6126	9.07567e-17	1.74562e-14	33.7687	43.7312	14.7144	11.2155	6.33355	5.89845	87.3588	101.183	21.6048	15.3352	4.8689	7.29633	3
Znfx1	62.2198	-0.396101	0.225504	83.9938	1.22344e-16	2.30089e-14	18.4924	15.6772	76.375	128.978	110.837	76.6799	22.3323	13.4911	25.9258	81.1861	94.9436	81.7189	2
Ifit3	253.241	-1.18897	0.441384	82.265	2.81685e-16	5.16159e-14	17.6884	14.027	283.078	680.138	507.476	363.738	7.882	2.52958	41.7693	302.193	478.37	340.009	2
Pnp	157.718	-0.435276	0.187802	82.2287	2.86653e-16	5.16159e-14	61.9093	68.4847	204.601	382.928	220.883	157.292	57.8013	53.1212	80.658	197.553	255.617	151.764	2
Sdc3	130.479	-0.474681	0.159988	82.1544	2.97112e-16	5.23846e-14	68.3414	80.8615	114.913	217.9	231.966	180.886	56.4876	47.2189	64.8145	130.8	186.236	185.327	2
Clec7a	47.6221	0.484957	0.224805	79.1025	1.29292e-15	2.23307e-13	15.2763	14.027	24.5241	40.8563	49.8767	86.5106	21.0187	20.2367	33.1274	36.0827	98.5953	131.334	1
Lpl	185.387	0.251489	0.15761	78.9836	1.3691e-15	2.31733e-13	73.1655	69.3098	337.732	173.84	178.131	208.412	115.603	86.0058	260.698	239.048	170.412	312.283
Tubb5	159.32	0.028972	0.147251	78.9147	1.41528e-15	2.34854e-13	213.868	204.629	188.485	150.608	86.2946	80.6122	268.645	239.467	200.205	148.841	64.513	65.667	4
Ifit2	193.121	-0.924273	0.490083	77.3245	3.04246e-15	4.9516e-13	10.4522	5.77582	203.199	512.707	387.138	198.581	3.941	1.68639	37.4484	210.182	429.681	316.661	2
Itm2b	1018.85	-0.162497	0.120015	77.176	3.26785e-15	5.21807e-13	781.504	826.767	767.253	974.143	1432.97	1480.51	612.168	621.434	682.713	724.36	1638.39	1683.99	1
Gbp3	27.1607	-0.994383	0.343542	76.3838	4.78336e-15	7.47241e-13	2.41205	5.77582	34.3337	87.3204	55.4186	31.4584	4.59783	0.843194	5.76129	31.5724	40.1684	26.2668	2
Id2	185.523	0.119743	0.142566	76.3524	4.85623e-15	7.47241e-13	205.828	332.522	212.308	130.58	79.9611	117.969	243.685	318.727	182.921	190.336	88.8575	122.578	3
Slc40a1	69.8403	-0.317775	0.229641	74.8057	1.02134e-14	1.54351e-12	29.7486	37.1303	74.2729	52.8729	94.2116	135.664	15.1072	22.7662	40.329	37.8868	166.76	131.334	2
Cd52	184.343	-0.621107	0.140799	74.6055	1.12447e-14	1.66954e-12	135.879	138.62	142.94	259.558	347.554	300.821	97.8681	75.8875	93.6209	137.114	223.969	258.29	2
Hmox1	255.056	0.0564706	0.132681	73.5467	1.86982e-14	2.72833e-12	310.35	360.576	357.351	134.586	127.463	220.209	304.114	311.139	420.574	188.532	130.243	195.542	4
Phf11b	21.3572	-0.468791	0.390115	73.1514	2.26057e-14	3.24257e-12	0.804017	0	23.1227	60.884	50.6684	23.5938	2.62733	2.52958	8.64193	25.2579	30.4306	27.7261	2
Stat2	41.3689	-0.382947	0.273653	72.7147	2.78776e-14	3.93213e-12	10.4522	11.5516	57.4564	100.138	55.4186	39.323	9.85249	5.05916	24.4855	53.222	82.7713	46.6965	2
Tuba1b	241.38	0.0704775	0.136396	71.8829	4.15509e-14	5.76467e-12	311.154	306.944	257.152	235.525	139.338	131.732	369.797	365.103	298.147	257.089	96.1608	128.415	4
Trim30a	50.6733	-0.218771	0.245378	71.499	4.99519e-14	6.81844e-12	17.6884	9.07629	53.953	99.337	89.4614	58.9845	12.4798	19.3935	20.1645	76.6758	77.9024	72.9633	2
Ifit1	83.3918	-0.873231	0.425906	71.3428	5.38366e-14	7.23206e-12	6.43213	8.25117	129.627	225.11	149.63	84.5445	3.941	1.68639	27.3661	110.052	153.37	100.689	2
Gm43302	15.7584	-1.21118	0.435787	70.5487	7.87814e-14	1.04176e-11	0	4.12559	14.7144	45.663	41.9598	21.6277	0	2.52958	0	14.4331	27.9962	16.0519	2
Mndal	37.3005	-0.660462	0.29253	70.2991	8.87936e-14	1.15609e-11	7.23615	14.027	40.6399	88.9226	73.6275	39.323	5.9115	6.74555	8.64193	43.2993	60.8613	58.3707	2
Calr	318.843	0.0258655	0.137501	69.3631	1.39041e-13	1.78288e-11	214.672	271.464	475.767	502.293	177.339	251.667	264.704	256.331	404.731	607.092	226.404	173.653	4
Trafd1	56.3708	-0.394379	0.238519	69.2446	1.4716e-13	1.85883e-11	18.4924	22.2782	64.4633	95.3315	104.504	64.883	13.7935	20.2367	17.2839	65.851	119.288	70.0448	2
Stmn1	39.3975	0.448875	0.240398	68.4692	2.13334e-13	2.65506e-11	52.2611	53.6326	43.4427	28.8398	13.4588	5.89845	78.1631	76.7307	46.0903	55.0261	13.3895	5.83707	4
Pltp	149.25	-0.291344	0.155106	68.2735	2.34276e-13	2.8324e-11	133.467	126.243	100.899	101.74	252.55	245.769	88.6724	75.0443	77.7774	104.64	214.232	269.964	1
Ifi207	89.0645	-0.257209	0.185978	68.2851	2.32983e-13	2.8324e-11	36.9848	47.8568	112.11	113.757	143.297	112.071	28.9007	35.4142	53.2919	109.15	146.067	129.875	2
Oas1g	28.8015	-0.404848	0.280679	68.1029	2.54207e-13	3.03008e-11	8.84418	9.90141	22.422	61.6851	51.4601	35.3907	6.56833	5.05916	10.0823	41.4951	47.4718	45.2373	2
Sp100	51.637	-0.467473	0.241483	68.0172	2.64854e-13	3.0944e-11	13.6683	17.3275	61.6605	97.7348	87.878	80.6122	17.0777	13.4911	17.2839	58.6344	82.7713	71.5041	2
Id1	25.2885	-0.114127	0.335769	68.001	2.66917e-13	3.0944e-11	62.7133	42.081	37.1365	10.4144	3.16678	5.89845	40.7236	32.0414	38.8887	27.9641	2.43445	0	3
Ctss	829.729	-0.110515	0.104527	67.0849	4.13745e-13	4.73179e-11	585.324	611.412	629.918	859.585	1264.34	1266.2	606.257	636.612	617.898	685.572	1135.67	1057.97	1
Ifit1bl1	11.6803	-1.64639	0.509579	66.9288	4.45811e-13	5.03054e-11	0	1.65023	14.0138	45.663	33.2511	9.83075	0	0	2.88064	9.02068	19.4756	4.3778	2
Fcgr1	99.6542	-0.67015	0.366215	65.9386	7.15718e-13	7.96989e-11	15.2763	13.2019	80.5791	238.729	204.257	163.19	13.1367	12.6479	17.2839	85.6964	175.28	176.571	2
Ly6a	15.0131	-2.39426	0.511239	65.8951	7.30761e-13	8.03173e-11	4.02008	2.47535	1.40138	38.453	49.085	51.1199	0	0.843194	1.44032	0.902068	15.8239	14.5927	1
C1qb	452.992	-0.593138	0.123001	65.5813	8.49002e-13	9.21167e-11	475.978	460.415	321.616	495.884	695.899	753.036	298.202	284.156	195.884	291.368	445.505	717.959	1
Ifi209	11.6236	-1.75713	0.520118	65.208	1.01474e-12	1.08706e-10	0	0	16.1158	38.453	32.4594	19.6615	0	0	0	9.92275	9.7378	13.1334	2
Ifit3b	78.8822	-1.10423	0.566946	65.1553	1.04061e-12	1.10084e-10	1.60803	2.47535	85.4839	250.746	148.838	110.104	1.9705	0	10.0823	86.5985	121.723	126.956	2
Ms4a7	556.513	-0.387096	0.131374	64.9343	1.15649e-12	1.20831e-10	429.345	494.245	453.345	607.237	913.615	780.562	313.966	355.828	311.11	335.569	832.582	850.752	1
AW112010	27.9208	-1.21049	0.340712	64.7085	1.28815e-12	1.32946e-10	7.23615	9.90141	16.8165	77.7072	82.3362	35.3907	1.31367	5.05916	10.0823	13.531	37.734	37.9409	2
Phf11d	20.8985	-1.28334	0.370909	64.6694	1.3124e-12	1.33817e-10	0.804017	4.9507	25.9255	65.6906	47.5016	35.3907	3.28416	0.843194	5.76129	18.0414	27.9962	14.5927	2
Ctla2a	27.2032	-0.413327	0.305053	64.2461	1.60639e-12	1.61844e-10	61.1053	69.3098	33.633	16.8232	2.37508	9.83075	39.41	37.1005	33.1274	10.8248	8.52058	4.3778	4
Tor3a	103.488	-0.382767	0.18522	62.3983	3.87854e-12	3.86166e-10	36.9848	70.135	140.838	186.657	143.297	117.969	29.5575	54.8076	63.3742	115.465	163.108	119.66	2
Ddx58	35.9314	-0.528752	0.321735	62.3516	3.96588e-12	3.9027e-10	6.43213	6.60094	51.1502	92.9281	57.7936	37.3569	9.19566	3.37278	11.5226	36.0827	55.9924	62.7485	2
Clec4a1	9.47378	-1.20127	0.584549	62.0272	4.62896e-12	4.50286e-10	0.804017	1.65023	3.50344	9.61326	19.7923	29.4923	0	0	0	0.902068	15.8239	32.1039	1
Gvin2	32.3742	-0.575679	0.314139	61.6683	5.49236e-12	5.28203e-10	8.84418	6.60094	48.3475	71.2983	48.2933	39.323	6.56833	3.37278	10.0823	36.9848	62.0785	46.6965	2
Samhd1	109.549	-0.447017	0.213559	61.2618	6.66597e-12	6.33866e-10	50.6531	39.6056	120.518	252.348	192.382	108.138	45.9783	37.1005	44.65	110.052	157.022	156.142	2
Psap	1840.31	0.503854	0.0924092	61.0908	7.23164e-12	6.80015e-10	1175.47	1035.52	1327.1	1603.81	2067.9	1918.96	1701.2	1572.56	1783.12	2083.78	3123.4	2690.89
Rsad2	208.41	-0.457327	0.436093	60.9022	7.91099e-12	7.35722e-10	11.2562	26.4037	348.943	604.834	293.718	133.698	14.4503	7.58875	106.584	317.528	419.943	215.971	2
Ifi205	10.5585	-1.05378	0.52461	59.3613	1.64696e-11	1.51502e-09	0	0.825117	4.90482	32.8453	27.7093	17.6954	0.656833	0	1.44032	6.31447	18.2584	16.0519	2
Herc6	21.8484	-0.305345	0.334825	58.9404	2.01192e-11	1.83085e-09	4.8241	4.12559	28.7282	52.0718	34.8345	17.6954	3.28416	4.21597	10.0823	32.4744	45.0373	24.8075	2
Abcg1	46.3989	0.0414776	0.231109	58.3313	2.68733e-11	2.41946e-09	16.0803	17.3275	31.531	68.895	83.1279	55.0522	17.7345	21.923	31.6871	39.691	87.6402	86.0967	2
Unc93b1	113.29	-0.381579	0.168378	58.2794	2.75442e-11	2.45376e-09	85.2258	72.6103	81.9805	151.409	194.757	163.19	59.7718	56.494	57.6129	78.4799	188.67	169.275	2
Irgm2	28.3888	-0.758866	0.308147	58.0608	3.05585e-11	2.69392e-09	10.4522	9.07629	37.1365	70.4972	45.1265	31.4584	5.25466	1.68639	12.9629	34.2786	46.2546	36.4817	2
Sat1	173.471	-0.00537634	0.160051	57.2894	4.408e-11	3.84587e-09	92.4619	91.588	134.532	247.541	254.925	214.31	106.407	112.145	95.0613	165.98	276.31	290.394	2
Cmpk2	100.455	-0.442858	0.523093	56.8447	5.44364e-11	4.70097e-09	2.41205	4.9507	156.253	360.497	134.588	68.8153	8.53883	0.843194	40.329	179.511	165.543	83.1782	2
Mt1	190.956	0.413896	0.138153	56.7587	5.67053e-11	4.84744e-09	248.441	260.737	139.437	113.757	105.295	121.901	326.446	308.609	187.242	209.28	130.243	140.09	3
Gclm	65.7376	0.0383245	0.203741	56.1454	7.58515e-11	6.41932e-09	79.5977	99.8392	131.729	34.4475	26.9176	27.5261	61.7423	72.5147	129.629	51.4179	41.3857	32.1039	4
Mpeg1	461.86	-0.0877727	0.113755	55.9061	8.49637e-11	7.07784e-09	357.787	305.293	383.977	576.795	614.354	593.777	310.025	301.02	347.118	461.859	592.789	697.529	2
Ubc	664.563	0.0632445	0.110497	55.8752	8.62193e-11	7.07784e-09	347.335	589.134	572.462	743.425	836.82	798.257	413.148	613.845	502.672	664.824	931.178	961.657	2
Tuba1c	124.183	0.041946	0.167308	55.8607	8.68155e-11	7.07784e-09	198.592	211.23	133.831	93.7292	71.2524	41.2892	155.013	173.698	154.114	119.975	64.513	72.9633	3
Mmp12	221.849	-0.00922116	0.152136	55.8567	8.69781e-11	7.07784e-09	139.899	208.755	434.427	239.53	145.672	173.021	199.02	221.76	373.043	289.564	133.895	103.608	4
Fcgrt	70.4947	-0.51651	0.18813	55.5932	9.85502e-11	7.94315e-09	77.1856	70.135	39.9392	47.2652	133.005	119.935	47.292	34.571	24.4855	39.691	113.202	99.2301	1
Cd300a	96.8075	0.112193	0.165953	54.92	1.35579e-10	1.08246e-08	62.7133	52.8075	56.7557	91.3259	126.671	167.123	65.6833	58.1804	79.2177	71.2634	160.674	169.275	1
Tgtp2	60.4033	-1.20105	0.537204	53.8683	2.23064e-10	1.76429e-08	4.02008	4.12559	54.6537	162.624	155.964	80.6122	3.28416	0.843194	5.76129	41.4951	110.768	100.689	2
Cxcr4	113.204	0.0138389	0.166962	53.8264	2.27522e-10	1.78289e-08	111.758	161.723	49.7488	54.4751	132.213	173.021	129.396	121.42	76.3371	44.2013	150.936	153.223	1
Sdf2l1	38.0912	0.223532	0.250277	53.7083	2.40597e-10	1.86805e-08	22.5125	21.453	88.9874	49.6685	15.0422	19.6615	28.2438	37.9437	73.4564	69.4592	21.9101	8.7556	4
Atrip	34.5261	-0.70438	0.307867	53.3871	2.80077e-10	2.15481e-08	7.23615	19.8028	44.1433	56.0773	65.7106	45.2215	5.25466	6.74555	7.20161	34.2786	65.7302	56.9114	2
Psmb9	55.0665	-0.521013	0.210969	52.8467	3.61615e-10	2.75707e-08	32.9647	26.4037	48.3475	96.1326	92.6282	86.5106	25.6165	18.5503	23.0452	47.8096	83.9886	78.8004	2
Ms4a4c	24.3134	-1.87386	0.728491	52.5955	4.07195e-10	3.07687e-08	0	0.825117	5.6055	90.5248	85.5029	43.2553	0	0.843194	0	6.31447	34.0823	24.8075	2
Trex1	23.9793	-0.824539	0.31898	52.4611	4.33883e-10	3.24951e-08	7.23615	9.90141	24.5241	45.663	47.5016	41.2892	5.9115	0.843194	8.64193	26.16	36.5168	33.5631	2
Slc7a8	63.4358	-0.141032	0.191327	52.3841	4.49965e-10	3.3404e-08	86.8338	88.2875	94.5929	76.1049	36.4179	17.6954	73.5653	85.1626	66.2548	85.6964	31.6479	18.9705	3
Gbp4	11.8234	-0.917021	0.504486	52.0972	5.15285e-10	3.79205e-08	0.804017	1.65023	5.6055	41.6574	25.3342	15.7292	0.656833	1.68639	0	8.11861	23.1273	17.5112	2
Dtx3l	30.526	-0.588284	0.265913	51.8168	5.8823e-10	4.29154e-08	8.04017	14.027	39.2385	59.2817	55.4186	43.2553	5.9115	10.1183	24.4855	25.2579	46.2546	35.0224	2
Sp110	35.6182	-0.263987	0.244448	51.5546	6.65739e-10	4.81551e-08	16.8844	12.3768	27.3268	75.3038	58.5853	45.2215	18.3913	12.6479	15.8435	48.7117	59.644	36.4817	2
Tap1	31.7101	-0.146242	0.274021	51.4611	6.95759e-10	4.99001e-08	11.2562	7.42605	30.1296	66.4917	63.3355	25.56	11.1662	10.9615	21.6048	34.2786	55.9924	42.3187	2
S100a4	332.909	-0.132291	0.141132	51.2698	7.61519e-10	5.41575e-08	446.229	481.868	397.991	384.53	200.299	180.886	372.424	368.476	358.64	409.539	278.745	115.282	4
Cd72	60.5129	-0.908922	0.20219	51.2149	7.81471e-10	5.42097e-08	41.8089	30.5293	64.4633	140.193	102.92	94.3752	25.6165	18.5503	24.4855	58.6344	55.9924	68.5855	2
Dhx58	25.8122	-0.725426	0.298805	51.228	7.76668e-10	5.42097e-08	8.04017	9.07629	26.6261	58.4806	45.1265	45.2215	8.53883	4.21597	8.64193	35.1806	40.1684	20.4297	2
Psme1	83.0756	-0.365416	0.179739	51.2421	7.71528e-10	5.42097e-08	44.2209	64.3591	69.3681	129.779	135.38	106.172	35.469	37.9437	48.971	81.1861	122.94	121.119	2
Fcgr4	44.0031	-0.293725	0.234863	50.9849	8.71062e-10	5.99333e-08	29.7486	22.2782	18.2179	80.1105	77.586	58.9845	24.3028	22.7662	11.5226	39.691	66.9474	75.8819	2
Hmga2	53.0025	0.2895	0.205929	49.3501	1.88206e-09	1.2845e-07	68.3414	81.6866	42.0413	58.4806	27.7093	9.83075	97.8681	86.849	44.65	57.7323	38.9512	21.889	3
Cd5l	153.115	0.775766	0.15433	48.7263	2.52433e-09	1.70034e-07	73.9695	70.9601	104.402	107.348	128.254	171.055	113.632	121.42	135.39	157.862	318.913	334.172	1
Cybb	101.564	-0.321013	0.174017	48.7202	2.53152e-09	1.70034e-07	49.849	56.9331	112.11	191.464	142.505	131.732	49.2625	50.5916	80.658	97.4233	142.415	113.823	2
Gapdh	708.422	0.131561	0.107146	48.3553	3.00557e-09	2.00285e-07	733.263	818.516	867.452	699.364	443.349	483.673	856.51	829.703	900.201	921.011	494.194	453.832	4
Kcnn4	62.5893	-0.0979318	0.192429	47.9816	3.58284e-09	2.36887e-07	96.482	81.6866	75.6743	59.2817	23.7508	49.1538	95.2408	83.4762	80.658	57.7323	23.1273	24.8075	3
Stat1	141.685	-0.480767	0.400161	47.8837	3.75139e-09	2.46108e-07	16.8844	31.3545	147.144	336.464	273.134	145.495	22.3323	15.1775	43.2097	134.408	298.22	236.401	2
Gvin-ps7	12.1419	0.178781	0.443201	47.6241	4.23814e-09	2.75903e-07	0.804017	0.825117	18.2179	35.2486	11.8754	5.89845	1.31367	2.52958	10.0823	24.3558	17.0412	17.5112	2
Psmb8	106.475	-0.254403	0.197204	47.2753	4.99271e-09	3.22544e-07	53.0651	47.0317	110.008	193.066	143.297	147.461	52.5466	54.8076	53.2919	95.6192	150.936	176.571	2
Esd	290.152	0.263473	0.121875	46.9706	5.76046e-09	3.69324e-07	213.868	263.212	469.461	234.724	187.631	226.107	279.811	279.097	511.314	332.863	245.88	237.86	4
Psmb10	68.5256	-0.556547	0.212183	46.8122	6.20495e-09	3.94831e-07	36.1808	42.081	68.6674	134.586	100.545	98.3075	30.2143	27.8254	20.1645	77.5778	105.899	80.2597	2
Gm7592	17.4069	-1.1999	0.354576	46.3144	7.83722e-09	4.94973e-07	4.8241	4.12559	19.6193	43.2597	40.3764	35.3907	3.941	1.68639	7.20161	18.0414	15.8239	14.5927	2
Ifi35	38.7333	-0.519567	0.26298	45.0579	1.41209e-08	8.81534e-07	18.4924	14.027	51.1502	92.127	60.1687	35.3907	11.823	13.4911	17.2839	58.6344	35.2995	56.9114	2
Ube2c	16.8896	1.04677	0.372355	45.051	1.41662e-08	8.81534e-07	19.2964	18.9777	16.8165	11.2155	0	1.96615	44.0078	40.4733	23.0452	17.1393	9.7378	0	4
Txnip	165.821	-0.992574	0.178798	43.9154	2.40967e-08	1.48854e-06	204.22	102.315	155.553	277.182	311.927	241.837	59.115	63.2396	63.3742	121.779	177.715	211.594	2
Cebpa	93.0921	0.629197	0.162379	43.8945	2.43334e-08	1.49227e-06	130.251	84.1619	53.2523	40.8563	62.5438	70.7814	190.482	148.402	82.0984	73.9696	91.2919	89.0153	3
Cd74	30.2748	-0.605655	0.270815	43.6534	2.72352e-08	1.65821e-06	18.4924	16.5023	18.2179	31.2431	72.0441	58.9845	12.4798	11.8047	15.8435	13.531	32.8651	61.2892	1
Lst1	117.744	-0.278638	0.183402	43.2664	3.26304e-08	1.97251e-06	95.678	94.8885	79.1777	120.967	218.507	135.664	82.1041	75.0443	48.971	69.4592	169.194	223.268	1
Rn18s	334.488	-0.65068	0.322054	42.901	3.86976e-08	2.27429e-06	412.461	125.418	129.627	211.492	245.425	1645.67	162.238	135.754	106.584	144.331	255.617	439.239	1
Manf	48.7504	0.169984	0.223914	42.9369	3.80554e-08	2.27429e-06	38.5928	37.9554	111.409	32.8453	24.5425	33.4246	37.4395	34.571	108.024	65.851	34.0823	26.2668	4
Rrm2	10.0915	0.26753	0.452549	42.9077	3.85776e-08	2.27429e-06	16.8844	19.8028	8.40825	6.40884	0.791694	1.96615	22.3323	21.0799	14.4032	9.02068	0	0	4
Tlr2	28.1675	-1.90797	0.320646	42.9265	3.82408e-08	2.27429e-06	13.6683	117.167	18.9186	29.6409	38.793	49.1538	5.9115	20.2367	4.32097	5.41241	8.52058	26.2668
Vsir	75.0449	-0.0755845	0.170566	42.6713	4.30748e-08	2.51408e-06	49.045	45.3814	53.2523	72.9005	121.129	125.834	49.2625	47.2189	51.8516	71.2634	108.333	105.067	1
Aif1	52.6714	-0.497529	0.248979	42.3945	4.90099e-08	2.84089e-06	28.9446	39.6056	28.0275	77.7072	96.5866	82.5783	28.2438	26.9822	15.8435	21.6496	77.9024	107.986	1
Gvin1	14.8872	-0.275836	0.415956	42.2207	5.31459e-08	3.05969e-06	0.804017	3.30047	20.3199	47.2652	23.7508	7.8646	3.28416	1.68639	11.5226	18.9434	19.4756	20.4297	2
Tnfrsf1b	82.3358	-0.102734	0.178947	42.0065	5.87252e-08	3.35805e-06	45.0249	80.8615	68.6674	65.6906	111.629	129.766	39.41	59.0236	60.4935	59.5365	157.022	110.904
Eno1	155.649	0.0364671	0.146572	41.9033	6.16195e-08	3.49991e-06	186.532	174.925	218.615	143.398	102.92	90.4429	214.784	165.266	203.085	198.455	87.6402	81.7189	4
Pdgfa	10.7372	-0.378326	0.459893	41.3779	7.86994e-08	4.44022e-06	20.9044	32.1796	2.80275	6.40884	6.33355	1.96615	20.3618	26.139	4.32097	4.51034	0	2.91853	3
Gm5431	11.6292	0.0245456	0.439981	41.0619	9.11657e-08	5.10951e-06	0	2.47535	11.9117	18.4254	21.3757	13.7631	2.62733	0.843194	5.76129	14.4331	23.1273	24.8075	2
Cotl1	227.947	0.056264	0.121816	40.7668	1.04574e-07	5.82243e-06	328.843	307.769	176.573	193.867	171.006	167.123	322.505	304.393	174.279	207.476	187.453	194.082	3
Parp12	30.4521	-0.396571	0.280613	40.7493	1.0543e-07	5.83175e-06	12.0603	9.90141	41.3406	68.0939	45.1265	31.4584	9.85249	10.9615	12.9629	42.3972	38.9512	42.3187	2
Hsp90b1	123.628	0.0740059	0.158372	40.2616	1.32254e-07	7.26798e-06	106.934	100.664	203.199	169.033	64.1272	88.4768	115.603	110.458	158.435	198.455	93.7264	74.4226	4
Anpep	158.564	0.21442	0.144756	40.2099	1.35463e-07	7.39629e-06	106.934	81.6866	116.314	187.458	216.132	173.021	128.739	113.831	128.189	159.666	247.097	243.698	2
Parp9	26.3411	-0.388332	0.291718	40.1768	1.37564e-07	7.45046e-06	10.4522	9.07629	36.4358	50.4696	38.0013	31.4584	8.53883	6.74555	11.5226	36.9848	41.3857	35.0224	2
Tmem140	66.4253	-0.10439	0.21053	40.1666	1.38216e-07	7.45046e-06	34.5727	50.3321	42.742	98.5359	107.67	66.8491	41.3805	29.5118	36.0081	59.5365	135.112	94.8523	2
Daxx	22.7614	-0.832432	0.304083	39.973	1.51222e-07	8.09997e-06	11.2562	8.25117	23.8234	50.4696	47.5016	31.4584	5.25466	5.05916	12.9629	18.9434	30.4306	27.7261	2
Nt5c3	29.3532	-0.26667	0.294985	39.68	1.73254e-07	9.22171e-06	8.84418	10.7265	35.7351	58.4806	36.4179	39.323	8.53883	10.9615	11.5226	33.3765	55.9924	42.3187	2
Selenow	104.581	-0.0786295	0.159812	39.5223	1.86403e-07	9.85955e-06	68.3414	58.5833	89.6881	189.061	144.088	106.172	72.9085	69.1419	84.979	136.212	135.112	100.689	2
Dusp6	21.4569	-0.709072	0.322231	39.3962	1.97632e-07	1.03886e-05	63.5173	15.6772	35.0344	20.0276	12.6671	11.7969	36.1258	13.4911	23.0452	20.7476	2.43445	2.91853	3
Tubb4b	54.8375	-0.127221	0.201828	39.2403	2.12445e-07	1.10581e-05	73.1655	78.3861	76.375	51.2707	30.8761	29.4923	66.997	74.2011	74.8967	62.2427	18.2584	21.889	4
Vim	608.159	0.182962	0.124264	39.2349	2.12983e-07	1.10581e-05	607.033	634.515	688.076	591.215	403.764	430.587	810.532	863.431	792.177	745.108	394.381	337.091	4
mt-Nd3	228.24	0.243143	0.189027	38.7535	2.66219e-07	1.37379e-05	327.235	411.733	269.765	116.16	112.421	88.4768	336.298	279.94	231.892	249.873	132.678	182.408	4
Tmsb10	240.163	0.0871266	0.122842	38.7121	2.71373e-07	1.3919e-05	261.305	268.163	229.826	346.878	167.047	133.698	275.213	278.254	246.295	320.234	203.277	151.764	4
Clec4a3	8.68313	-0.370048	0.505628	38.4905	3.00698e-07	1.53302e-05	4.8241	0.825117	2.80275	4.00552	21.3757	23.5938	1.9705	2.52958	1.44032	3.60827	10.955	26.2668	1
Pik3ap1	193.614	-0.134228	0.1359	38.2835	3.30938e-07	1.67708e-05	150.351	138.62	180.777	224.309	256.509	245.769	113.632	129.009	142.592	189.434	289.7	262.668
Rbm3	156.975	0.151667	0.135829	38.2628	3.34132e-07	1.68319e-05	160.803	184.826	208.805	155.414	93.4199	90.4429	185.884	223.446	203.085	164.176	101.03	112.364
Themis2	50.9682	-0.284293	0.261533	37.9755	3.81627e-07	1.91107e-05	25.7285	21.453	48.3475	118.563	81.5445	37.3569	27.587	13.4911	27.3661	46.9075	81.5541	81.7189	2
Rassf4	29.9441	-0.42282	0.273026	37.6999	4.33496e-07	2.15805e-05	11.2562	30.5293	26.6261	30.442	41.9598	53.0861	7.22516	17.7071	15.8435	14.4331	47.4718	62.7485	2
Ifi27	58.402	0.119075	0.233481	37.6259	4.48579e-07	2.22007e-05	94.874	94.8885	81.9805	29.6409	17.4173	31.4584	64.3696	81.7898	82.0984	65.851	31.6479	24.8075	4
Ubb	686.707	-0.19842	0.105203	37.5758	4.59081e-07	2.25884e-05	455.073	630.389	662.15	812.32	933.407	926.057	463.067	575.058	540.121	612.504	856.927	773.411	2
C1qc	302.038	-0.411673	0.127461	37.5479	4.65047e-07	2.27497e-05	303.114	310.244	203.199	338.867	439.39	462.045	234.489	244.526	167.077	217.398	260.486	443.617	1
Apoe	262.899	0.487269	0.121244	37.5341	4.68018e-07	2.27634e-05	196.984	205.454	146.444	184.254	274.718	296.889	267.988	258.861	217.489	237.244	461.328	407.135	1
Tgtp1	5.81712	-0.802282	0.665137	37.4979	4.7591e-07	2.3015e-05	0	0	3.50344	25.6353	11.8754	5.89845	0	0	2.88064	5.41241	7.30335	7.29633	2
Ptms	185.122	-0.0993508	0.127436	36.7074	6.85519e-07	3.29633e-05	155.175	170.799	137.335	159.42	265.217	257.566	150.415	147.559	135.39	136.212	264.138	242.238	2
Ifitm2	153.315	-0.278136	0.138045	36.2767	8.36135e-07	3.99786e-05	139.095	151.822	103.001	162.624	222.466	220.209	108.377	104.556	90.7403	128.094	204.494	204.297	2
Ctsh	44.2283	0.215394	0.215088	36.2562	8.44073e-07	4.00824e-05	29.7486	19.8028	23.1227	44.0608	64.9189	62.9168	26.9302	32.0414	25.9258	48.7117	69.3819	83.1782	1
Cxcl16	52.3225	-1.08725	0.21897	36.2467	8.47779e-07	4.00824e-05	34.5727	62.7089	54.6537	56.8784	93.4199	114.037	19.705	21.923	27.3661	18.0414	41.3857	83.1782	1
Fdps	37.3058	0.224526	0.26692	36.223	8.57068e-07	4.02965e-05	35.3767	43.7312	72.8715	29.6409	16.6256	11.7969	52.5466	59.0236	43.2097	54.1241	24.3445	4.3778	4
Ptafr	49.2723	-0.0362574	0.244115	36.1907	8.69919e-07	4.06747e-05	23.3165	44.5563	35.0344	46.4641	75.2109	51.1199	23.646	30.355	23.0452	27.062	110.768	100.689	2
Azin1	58.9154	0.449272	0.199066	35.8443	1.02043e-06	4.74502e-05	68.3414	53.6326	65.8647	52.0718	24.5425	29.4923	83.4178	102.87	93.6209	70.3613	21.9101	40.8595	4
Ddit3	55.1076	0.172367	0.235312	35.7443	1.0685e-06	4.94138e-05	11.2562	32.1796	32.9323	78.5083	95.0033	78.646	34.1553	39.6301	40.329	50.5158	79.1197	89.0153	1
Nfkbia	46.4323	-0.818571	0.228945	35.516	1.18683e-06	5.45876e-05	28.9446	140.27	56.055	60.884	39.5847	35.3907	21.6755	60.71	28.8064	25.2579	23.1273	36.4817	3
Pdia6	55.0349	-0.0358072	0.211798	35.4634	1.21594e-06	5.56242e-05	33.7687	46.2066	104.402	80.1105	30.8761	43.2553	49.2625	40.4733	76.3371	95.6192	35.2995	24.8075	4
mt-Rnr1	1176.42	-0.147839	0.14979	35.3627	1.27357e-06	5.79474e-05	972.86	1064.4	1008.99	1131.96	1664.93	1268.17	779.661	782.484	710.079	862.377	1674.9	2196.2	2
Mef2a	62.6141	-0.033888	0.201876	35.1866	1.38101e-06	6.25e-05	133.467	72.6103	58.8578	34.4475	44.3349	43.2553	96.5544	79.2603	66.2548	53.222	34.0823	35.0224	3
Aftph	26.0533	-0.507995	0.283049	35.0556	1.46667e-06	6.60237e-05	8.84418	14.8521	25.9255	45.663	47.5016	39.323	7.882	10.9615	15.8435	18.9434	46.2546	30.6446	2
Msr1	76.2252	-0.344359	0.18605	34.9192	1.56153e-06	6.99218e-05	86.0298	94.0634	134.532	87.3204	56.2103	47.1876	73.5653	75.8875	103.703	95.6192	25.5617	35.0224	4
Ms4a6c	37.0902	-0.851861	0.237782	34.7273	1.70542e-06	7.5963e-05	30.5526	30.5293	27.3268	62.4862	80.7528	49.1538	15.1072	16.0207	10.0823	31.5724	53.5579	37.9409	2
Id3	56.0478	0.0610571	0.201412	34.4256	1.95878e-06	8.67913e-05	65.9294	83.3368	61.6605	66.4917	23.7508	29.4923	74.879	64.926	59.0532	86.5985	31.6479	24.8075	3
Uba7	18.016	-0.356732	0.35982	34.147	2.22581e-06	9.81093e-05	6.43213	4.9507	19.6193	47.2652	26.1259	15.7292	4.59783	4.21597	10.0823	18.0414	32.8651	26.2668	2
Lgals1	1248.75	0.158508	0.100795	33.9882	2.39396e-06	0.000104974	1301.7	1452.21	1339.72	1215.28	841.571	918.192	1586.91	1444.39	1482.09	1528.1	984.735	890.153	4
Dhrs3	182.97	0.302735	0.131696	33.6709	2.76848e-06	0.000120771	119.798	127.068	139.437	149.005	244.633	200.547	175.374	145.873	152.674	175.001	286.048	280.179	2
Fabp5	1143.25	0.723446	0.0968203	33.5386	2.94145e-06	0.000127659	648.037	734.354	718.906	911.657	1067.99	1103.01	1205.95	1146.74	1150.82	1492.02	1867.22	1672.32	2
Helz2	14.3103	-0.505686	0.388638	33.5263	2.95808e-06	0.000127726	4.8241	5.77582	18.9186	32.0442	21.3757	11.7969	2.62733	0.843194	11.5226	25.2579	13.3895	23.3483	2
mt-Cytb	800.983	0.0968492	0.128913	33.5144	2.97423e-06	0.000127771	1040.4	1176.62	955.038	629.668	441.765	517.098	918.909	957.025	882.917	807.351	634.174	650.833	4
Isg20	6.1303	-0.822996	0.642078	33.3303	3.23575e-06	0.000138304	1.60803	0	4.20413	29.6409	9.50033	3.9323	0	0	4.32097	7.21654	7.30335	5.83707	2
Hacd4	42.2814	0.0298051	0.219067	33.2967	3.28587e-06	0.000139042	37.7888	28.054	16.8165	46.4641	63.3355	57.0184	31.528	34.571	15.8435	46.0055	80.3369	49.6151	2
Il18bp	8.38436	-0.0356782	0.536527	33.3002	3.28053e-06	0.000139042	1.60803	0	1.40138	12.8177	21.3757	17.6954	2.62733	2.52958	2.88064	3.60827	19.4756	14.5927	2
Pgam1	232.944	0.223806	0.139922	33.2697	3.32671e-06	0.000140069	223.517	235.983	297.092	207.486	171.798	137.631	259.449	276.568	345.677	349.1	150.936	140.09	4
Mki67	10.1107	0.867285	0.444659	33.1925	3.44629e-06	0.000144386	11.2562	15.6772	7.00688	6.40884	1.58339	0	24.3028	29.5118	11.5226	9.92275	1.21723	2.91853	4
Trim30d	13.886	-0.557055	0.39061	33.0891	3.61313e-06	0.00015063	4.8241	1.65023	15.4151	27.2376	24.5425	25.56	1.31367	5.05916	8.64193	14.4331	14.6067	23.3483	2
Lgals9	111.617	-0.261179	0.155757	32.9456	3.85827e-06	0.000160061	88.4418	67.6596	118.416	169.834	160.714	123.867	65.6833	70.8283	76.3371	135.31	141.198	121.119	2
Gbp7	10.0659	-1.32337	0.489724	32.7851	4.15179e-06	0.000171398	4.02008	1.65023	14.7144	24.0331	26.9176	11.7969	0	1.68639	1.44032	12.6289	14.6067	7.29633	2
Top2a	11.1291	0.475955	0.422635	32.5745	4.5711e-06	0.000187792	16.8844	11.5516	13.3131	8.01105	2.37508	1.96615	29.5575	22.7662	12.9629	11.7269	2.43445	0	4
Lilrb4a	233.774	-0.227333	0.128026	32.531	4.66294e-06	0.00019064	231.557	271.464	341.235	334.061	167.047	171.055	210.843	251.272	288.064	228.223	133.895	176.571
Ifih1	23.767	-0.585378	0.306779	32.5138	4.69963e-06	0.000191216	12.8643	10.7265	26.6261	48.0663	43.5432	23.5938	8.53883	5.90236	8.64193	23.4538	42.6029	30.6446	2
Epsti1	27.8843	-0.737977	0.298803	32.4397	4.86128e-06	0.000196847	8.84418	13.2019	32.2316	63.2873	45.1265	49.1538	9.85249	10.9615	7.20161	23.4538	37.734	33.5631	2
Mt2	43.5623	0.198958	0.22026	32.1203	5.62398e-06	0.000226646	70.7535	62.7089	22.422	37.6519	24.5425	27.5261	69.6243	69.9851	40.329	47.8096	23.1273	26.2668	4
Cpd	33.2578	-0.0455627	0.251935	32.0862	5.71218e-06	0.00022911	26.5326	49.507	53.953	35.2486	17.4173	17.6954	40.7236	52.278	51.8516	32.4744	9.7378	11.6741	4
Itgav	32.035	-0.358155	0.252764	31.8246	6.43574e-06	0.000255708	65.9294	47.0317	28.7282	28.0387	21.3757	21.6277	59.7718	35.4142	21.6048	28.8662	8.52058	17.5112	3
Pcna	157.664	0.392579	0.143756	31.8298	6.42059e-06	0.000255708	147.135	128.718	226.322	119.365	83.1279	119.935	181.286	210.799	247.735	187.63	107.116	132.793	4
Dck	22.8061	-0.481441	0.325007	31.6048	7.11358e-06	0.000281319	10.4522	6.60094	35.0344	51.2707	36.4179	19.6615	5.25466	10.1183	8.64193	31.5724	35.2995	23.3483	2
Oas2	14.792	-1.06941	0.412839	31.445	7.65059e-06	0.000300894	4.8241	5.77582	21.0206	34.4475	26.9176	21.6277	3.941	0	2.88064	17.1393	17.0412	21.889	2
P2rx4	95.564	-0.303364	0.172706	31.4367	7.67967e-06	0.000300894	65.9294	63.534	95.2936	126.575	152.005	123.867	54.5171	64.0828	54.7322	80.284	122.94	143.008	2
Insig1	29.6335	0.111434	0.283231	31.3709	7.91285e-06	0.000308186	49.849	58.5833	25.9255	14.4199	9.50033	17.6954	42.0373	40.4733	36.0081	33.3765	7.30335	20.4297	4
Cdca3	9.93369	0.88528	0.453314	31.3638	7.93862e-06	0.000308186	19.2964	15.6772	2.80275	4.00552	3.16678	0	24.3028	22.7662	11.5226	8.11861	6.08613	1.45927
Sqle	21.3379	0.204655	0.300202	31.2663	8.29871e-06	0.000320694	28.9446	33.8298	30.8303	13.6188	5.54186	7.8646	28.9007	37.9437	27.3661	23.4538	6.08613	11.6741	3
Acta2	30.7342	-1.75505	0.327351	31.2336	8.42323e-06	0.000324026	86.0298	77.561	42.742	12.0166	18.209	47.1876	23.646	10.1183	10.0823	1.80414	14.6067	24.8075
Clec4n	20.864	-1.15954	0.368572	31.2063	8.52845e-06	0.000326589	16.0803	15.6772	25.2248	17.6243	31.6678	47.1876	4.59783	5.05916	4.32097	3.60827	34.0823	45.2373	1
Parp10	16.4414	-0.25389	0.351845	31.093	8.97951e-06	0.000342314	2.41205	5.77582	23.8234	33.6464	20.584	23.5938	5.9115	4.21597	12.9629	19.8455	18.2584	26.2668	2
Phf11a	6.45071	-0.870232	0.612808	30.7264	1.06075e-05	0.000402562	0.804017	1.65023	7.70757	16.0221	16.6256	3.9323	0	1.68639	0	9.02068	17.0412	2.91853	2
Psme2	116.488	-0.458549	0.173732	30.4096	1.22486e-05	0.000462767	73.1655	103.965	137.335	218.702	155.172	114.037	53.8603	64.926	76.3371	119.073	141.198	140.09	2
Ncoa4	55.9995	-0.00760218	0.196069	29.8846	1.55406e-05	0.000584534	34.5727	31.3545	46.9461	61.6851	83.9195	78.646	40.7236	36.2573	34.5677	53.222	98.5953	71.5041	2
Prc1	6.37005	0.835029	0.561346	29.5885	1.77702e-05	0.000665439	10.4522	8.25117	7.00688	2.40331	0	0	14.4503	16.0207	10.0823	6.31447	0	1.45927
Pgk1	178.39	0.154667	0.134316	29.5453	1.81213e-05	0.000675598	167.235	179.876	220.016	203.481	120.337	119.935	197.707	203.21	217.489	266.11	138.764	106.526	4
Srsf3	45.9422	0.07399	0.211993	29.3756	1.95674e-05	0.00072631	55.4772	59.4084	63.7626	46.4641	27.7093	15.7292	65.6833	64.0828	53.2919	53.222	23.1273	23.3483	4
Ddx60	9.18131	-0.454606	0.51718	29.329	1.99839e-05	0.000738532	1.60803	0.825117	8.40825	21.6298	26.9176	5.89845	3.28416	0.843194	1.44032	13.531	9.7378	16.0519	2
Gpr162	21.5565	-0.233411	0.302977	29.0452	2.27188e-05	0.000835954	15.2763	14.027	8.40825	24.8342	34.8345	39.323	11.823	15.1775	5.76129	13.531	45.0373	30.6446	1
Pou3f1	6.06151	-0.602094	0.588353	29.0124	2.30584e-05	0.000844776	0	0.825117	8.40825	12.8177	10.292	11.7969	0.656833	0	4.32097	9.02068	7.30335	7.29633	2
Ptma	272.667	-0.0352297	0.120729	28.8906	2.43623e-05	0.000888698	318.391	318.495	336.33	302.016	173.381	212.344	310.025	305.236	308.229	309.409	204.494	173.653	4
Pirb	126.722	-0.0816147	0.149442	28.7959	2.54267e-05	0.000923545	82.8137	83.3368	124.022	156.215	188.423	149.427	91.2998	86.849	106.584	119.073	161.891	170.734	2
Tnfaip8l2	38.3245	-0.142628	0.229703	28.6811	2.67787e-05	0.000968497	27.3366	22.2782	24.5241	48.0663	57.7936	57.0184	26.9302	16.8639	24.4855	38.7889	41.3857	74.4226	2
Tubb6	30.275	-0.114014	0.260423	28.6396	2.72845e-05	0.000982591	45.0249	52.8075	31.531	19.2265	18.209	19.6615	41.3805	52.278	34.5677	25.2579	7.30335	16.0519	3
Entpd1	36.4352	0.055383	0.23492	28.4278	3.00196e-05	0.00107197	36.1808	23.1033	17.5172	26.4365	56.2103	53.0861	26.2733	30.355	14.4032	32.4744	65.7302	55.4521	1
Cebpb	76.93	-0.622885	0.178917	28.437	2.98951e-05	0.00107197	64.3213	161.723	75.6743	96.1326	71.2524	88.4768	40.7236	108.772	51.8516	43.2993	59.644	61.2892	3
Txnrd1	69.1776	-0.0209814	0.195365	28.3958	3.04546e-05	0.00108293	84.4218	113.866	91.7901	35.2486	38.793	58.9845	57.1445	91.065	108.024	53.222	45.0373	52.5336	4
Cd274	44.2725	0.160223	0.257235	28.3643	3.08912e-05	0.00109386	10.4522	23.9284	55.3543	78.5083	56.2103	33.4246	26.2733	24.4526	28.8064	59.5365	73.0335	61.2892	2
Ccna2	9.13868	0.310203	0.472235	28.2985	3.18206e-05	0.00112207	16.0803	9.07629	10.5103	6.40884	3.95847	0	17.7345	21.0799	17.2839	6.31447	1.21723	0	4
Nampt	48.5354	-0.0353211	0.208918	28.2698	3.22344e-05	0.00113195	20.1004	33.0047	65.8647	76.1049	55.4186	47.1876	28.2438	26.9822	50.4113	67.6551	63.2957	48.1558	2
Glipr1	125.383	0.0197765	0.160221	28.2269	3.28632e-05	0.00114926	74.7736	102.315	150.648	125.773	142.505	135.664	70.2811	84.3194	126.748	113.661	213.014	164.897
Ptpro	22.866	-0.094165	0.286192	28.1852	3.34862e-05	0.00116623	6.43213	13.2019	18.9186	31.2431	33.2511	41.2892	9.19566	14.3343	12.9629	26.16	35.2995	32.1039	2
Ms4a6d	131.25	-0.335489	0.159306	28.0941	3.48897e-05	0.00121013	102.11	95.7136	117.716	179.447	205.84	174.987	83.4178	103.713	74.8967	100.13	191.104	145.927	2
Lrp1	127.126	0.112457	0.146999	28.0579	3.54619e-05	0.00122495	175.276	127.893	138.736	118.563	78.3777	92.4091	167.492	133.225	174.279	150.645	76.6852	91.9338	3
Trim25	42.2893	-0.0186049	0.229097	27.9705	3.68856e-05	0.00126895	30.5526	12.3768	38.5378	53.674	67.294	58.9845	26.9302	20.2367	48.971	61.3406	46.2546	42.3187	2
Ucp2	192.527	-0.197538	0.132171	27.9376	3.74349e-05	0.00128264	199.396	196.378	138.036	169.834	262.051	261.498	162.238	147.559	106.584	181.316	244.662	240.779
Skil	20.6894	-0.150984	0.338473	27.8086	3.96718e-05	0.0013538	35.3767	44.5563	14.7144	17.6243	13.4588	3.9323	36.1258	26.9822	25.9258	19.8455	2.43445	7.29633	3
Ctla2b	40.1993	-0.46381	0.240513	27.684	4.19587e-05	0.00142609	68.3414	84.9871	24.5241	47.2652	37.2096	19.6615	51.8898	48.0621	34.5677	31.5724	18.2584	16.0519	3
Ly86	14.9613	-0.315857	0.37722	27.5555	4.4454e-05	0.00150486	9.6482	4.9507	8.40825	29.6409	20.584	21.6277	3.28416	2.52958	11.5226	16.2372	29.2134	21.889	2
Mcl1	206.09	-0.210137	0.127407	27.4724	4.61454e-05	0.00155589	126.231	205.454	206.002	241.133	270.759	281.16	132.68	157.677	175.719	190.336	242.228	243.698	2
Cd36	165.566	0.499139	0.136602	27.4388	4.68458e-05	0.00157324	150.351	159.248	182.179	132.983	76.7943	123.867	185.884	220.074	250.616	229.125	118.071	157.601
Anxa4	223.54	0.190669	0.148538	27.3891	4.79042e-05	0.00160242	118.994	149.346	206.703	286.795	251.759	239.87	175.374	170.325	197.324	215.594	356.647	313.742	2
Cd47	86.8148	-0.126591	0.185477	27.3281	4.9235e-05	0.00163402	49.849	53.6326	84.0825	128.978	111.629	114.037	61.0855	54.8076	53.2919	77.5778	115.636	137.171	2
Junb	47.2069	-0.240091	0.22782	27.3311	4.91671e-05	0.00163402	28.9446	104.79	35.0344	66.4917	42.7515	31.4584	24.3028	72.5147	33.1274	33.3765	57.2096	36.4817	3
Anxa3	95.1971	0.334234	0.164834	27.2696	5.05431e-05	0.00167088	78.7936	112.216	118.416	68.895	57.7936	68.8153	113.632	149.245	145.473	106.444	65.7302	56.9114	4
Ran	94.6992	-0.105335	0.162522	27.238	5.12672e-05	0.00168823	123.819	124.593	117.716	83.3149	74.4192	60.9507	118.887	118.047	120.987	86.5985	48.689	58.3707	4
Arap1	49.7332	-0.0890533	0.207501	27.097	5.46147e-05	0.00179149	29.7486	38.7805	35.0344	50.4696	76.7943	72.7476	32.1848	37.9437	31.6871	37.8868	57.2096	96.3116	2
Shisa5	127.199	-0.229297	0.159544	26.9794	5.75707e-05	0.00188116	76.3816	101.489	125.423	175.442	175.756	167.123	86.0451	86.849	83.5387	109.15	158.239	180.949	2
Ass1	40.1354	-1.02252	0.234428	26.9539	5.82349e-05	0.00189554	26.5326	33.0047	71.4702	84.9171	53.0435	51.1199	11.1662	13.4911	34.5677	32.4744	37.734	32.1039
Sdcbp	380.34	0.102162	0.10844	26.8867	6.00152e-05	0.00194601	259.697	311.069	338.432	362.099	472.641	465.978	305.427	329.689	352.879	402.322	510.017	453.832	2
Ifi214	3.71576	-1.02615	0.825906	26.8195	6.18481e-05	0.00199779	0	0	2.10206	6.40884	11.0837	7.8646	0	0	0	1.80414	3.65168	11.6741
Cxcl10	31.5473	-2.07454	0.642697	26.7384	6.41365e-05	0.00206383	4.02008	12.3768	49.7488	165.028	57.7936	11.7969	0.656833	0.843194	4.32097	25.2579	29.2134	17.5112	2
Ell2	30.6809	0.0204161	0.260335	26.5421	7.00294e-05	0.00224492	27.3366	64.3591	30.1296	18.4254	20.584	21.6277	30.8711	58.1804	40.329	26.16	9.7378	20.4297	3
Tk1	8.28976	0.714795	0.497233	26.5081	7.1104e-05	0.00227077	15.2763	9.90141	5.6055	6.40884	0.791694	0	22.9892	15.1775	2.88064	15.3352	3.65168	1.45927	4
Myl9	5.22116	-2.67129	0.754199	26.4776	7.2082e-05	0.00229335	11.2562	12.3768	4.20413	0	1.58339	23.5938	0.656833	1.68639	0	0	0	7.29633
Ccnb1	6.42802	0.174465	0.570673	26.3258	7.71456e-05	0.00243613	6.43213	10.7265	9.80963	3.20442	2.37508	0	11.1662	14.3343	17.2839	1.80414	0	0	4
Prex1	33.1382	-0.210738	0.237249	26.3275	7.70878e-05	0.00243613	24.9245	19.8028	27.3268	32.0442	41.9598	64.883	17.7345	16.0207	24.4855	30.6703	36.5168	61.2892
Rasa4	44.8394	-0.105327	0.227353	26.3114	7.76449e-05	0.00244278	24.1205	23.1033	43.4427	64.8895	64.9189	57.0184	32.8416	22.7662	23.0452	44.2013	70.5991	67.1263
Tlr7	16.0935	-0.271364	0.337683	26.2372	8.02612e-05	0.00251574	11.2562	8.25117	7.00688	16.0221	34.0428	29.4923	11.823	9.27514	2.88064	11.7269	27.9962	23.3483	2
Tap2	31.1234	-0.201071	0.265829	26.1867	8.20947e-05	0.00256372	10.4522	14.027	28.0275	60.884	47.5016	47.1876	17.0777	18.5503	20.1645	32.4744	37.734	39.4002	2
Etv5	16.9645	-0.805292	0.367252	26.1494	8.34743e-05	0.00259722	47.437	28.054	21.0206	11.2155	8.70863	11.7969	24.3028	16.0207	14.4032	16.2372	0	4.3778	4
H2az1	101.452	0.278944	0.157172	26.1368	8.39451e-05	0.0026023	107.738	129.543	90.3887	84.9171	69.6691	64.883	135.308	161.05	129.629	110.954	70.5991	62.7485	4
Ftl1-ps1	1079.65	0.552573	0.106045	26.0696	8.6505e-05	0.00267187	918.991	850.696	1223.4	1032.62	630.98	642.931	1423.36	1119.76	1555.55	1391.89	1100.37	1065.26
Mfsd12	105.165	0.0621295	0.159727	26.0167	8.85722e-05	0.00272577	86.8338	82.5117	86.8853	79.3094	129.838	145.495	85.3883	77.5739	73.4564	92.0109	182.584	140.09	2
Nek6	21.594	-0.0406853	0.301703	25.9752	9.02315e-05	0.00276677	36.1808	32.1796	23.1227	12.0166	11.8754	13.7631	42.0373	27.8254	28.8064	16.2372	4.8689	10.2149	3
Snord3b4	12.7622	0.315319	0.385904	25.9588	9.0893e-05	0.00277699	16.0803	17.3275	17.5172	8.01105	0.791694	9.83075	22.3323	23.6094	15.8435	13.531	2.43445	5.83707
Prdx1	1244.03	-0.080308	0.124153	25.898	9.33926e-05	0.0028431	969.644	1165.89	2138.5	1306.6	942.907	1226.88	888.695	1013.52	1577.15	1227.71	1363.29	1107.58	4
C3	6.60043	-2.21505	0.67556	25.8491	9.54542e-05	0.00289544	1.60803	3.30047	3.50344	21.6298	23.7508	7.8646	0	0	0	2.7062	6.08613	8.7556	1
Jund	79.2922	-0.191196	0.180058	25.7609	9.92854e-05	0.0030009	59.4972	69.3098	65.164	86.5193	105.295	110.104	36.7826	57.3372	61.9338	67.6551	132.678	99.2301
Pkm	263.534	0.10723	0.133659	25.2367	0.00012541	0.00377703	275.778	276.414	372.065	229.116	164.672	210.378	289.007	290.059	338.476	340.982	195.973	179.49	4
Acod1	7.70777	-1.96019	0.621474	25.2084	0.000126998	0.00381128	0	17.3275	11.211	36.8508	7.91694	1.96615	0	4.21597	1.44032	4.51034	1.21723	5.83707
Serinc3	196.29	-0.0843816	0.131776	25.17	0.00012919	0.00386336	156.783	153.472	154.852	212.293	302.427	237.904	162.895	160.207	156.995	164.176	248.314	245.157	2
Arrdc3	32.09	-0.297969	0.258794	25.1237	0.000131877	0.00392984	28.1406	14.8521	32.2316	36.0497	55.4186	39.323	11.1662	14.3343	21.6048	36.0827	53.5579	42.3187	2
Emp1	58.7225	0.208421	0.194739	24.9573	0.000142005	0.00421681	68.3414	78.3861	46.2454	44.0608	33.2511	55.0522	86.0451	102.87	60.4935	58.6344	30.4306	40.8595	3
Aph1c	39.124	0.616559	0.230801	24.9304	0.000143714	0.00425264	29.7486	21.453	18.2179	28.0387	43.5432	37.3569	42.0373	32.0414	21.6048	33.3765	94.9436	67.1263
Adam8	155.295	0.00923089	0.141476	24.7606	0.000154974	0.00456985	208.24	188.952	184.982	138.591	104.504	108.138	195.079	195.621	152.674	165.078	125.374	96.3116	3
Il10ra	24.5285	-0.421713	0.294401	24.5438	0.000170626	0.00500571	12.8643	18.9777	13.3131	30.442	49.8767	43.2553	18.3913	16.0207	7.20161	11.7269	40.1684	32.1039	1
Samd9l	31.5691	-0.570572	0.269722	24.5397	0.000170938	0.00500571	16.8844	15.6772	42.742	60.884	43.5432	47.1876	11.1662	17.7071	11.5226	36.0827	38.9512	36.4817	2
Tnfaip2	99.7494	-0.169428	0.213237	24.3382	0.000186916	0.00545473	39.3968	173.275	78.477	98.5359	124.296	119.935	57.1445	66.6123	60.4935	80.284	127.809	170.734	2
Siglec1	6.89568	0.115396	0.557562	24.3278	0.000187774	0.00546093	0	0.825117	2.80275	13.6188	11.8754	13.7631	1.9705	3.37278	1.44032	6.31447	12.1723	14.5927
Calhm6	5.21772	-0.721221	0.688375	24.2625	0.000193292	0.00560217	0.804017	0	2.10206	13.6188	12.6671	9.83075	0	2.52958	0	4.51034	12.1723	4.3778	2
Tagln	18.6817	-1.90186	0.364821	24.2037	0.000198394	0.00573039	44.2209	47.0317	24.5241	8.81215	13.4588	37.3569	9.85249	11.8047	4.32097	0.902068	7.30335	14.5927
Mx2	6.41052	-1.0198	0.604457	24.045	0.000212828	0.00612642	0	1.65023	11.211	20.8287	15.8339	3.9323	1.31367	0.843194	1.44032	7.21654	9.7378	2.91853	2
Limd2	44.5557	-0.971084	0.229138	23.9724	0.000219778	0.00630502	38.5928	42.9061	31.531	77.7072	68.8774	92.4091	22.3323	19.3935	17.2839	24.3558	51.1235	48.1558	2
Litaf	111.053	0.25331	0.153839	23.9377	0.000223185	0.00638113	68.3414	84.1619	89.6881	109.751	136.963	112.071	89.9861	89.3786	84.979	121.779	185.018	160.519
Hsd17b12	36.6305	0.145337	0.235308	23.9101	0.000225926	0.00643775	40.2008	43.7312	44.844	36.0497	14.2505	27.5261	49.9193	42.1597	69.1355	34.2786	17.0412	20.4297	4
Fgl2	4.56163	-0.701774	0.701069	23.7299	0.000244654	0.00694801	0	1.65023	0	8.81215	14.2505	11.7969	0.656833	0.843194	1.44032	3.60827	7.30335	4.3778	2
Irf1	23.6044	-0.781109	0.296031	23.4817	0.000273	0.00770637	9.6482	18.9777	29.4289	41.6574	38.793	39.323	6.56833	12.6479	7.20161	22.5517	31.6479	24.8075	2
Lilr4b	245.288	-0.183943	0.122578	23.4802	0.000273179	0.00770637	228.341	268.163	348.943	295.608	197.132	226.107	212.157	263.92	286.624	285.053	160.674	170.734
Cenpa	14.1879	-0.0680718	0.360077	23.4264	0.000279735	0.00786512	30.5526	20.6279	9.80963	12.8177	11.0837	1.96615	29.5575	18.5503	11.5226	7.21654	12.1723	4.3778	3
Scoc	26.0281	0.080268	0.273586	23.4034	0.000282593	0.00791915	37.7888	40.4307	21.7213	13.6188	19.0007	17.6954	49.9193	44.6893	17.2839	20.7476	13.3895	16.0519
Clec4d	365.276	-0.0591661	0.121255	23.2946	0.000296475	0.00828075	311.154	366.352	482.073	253.149	333.303	501.368	300.173	311.139	373.043	275.131	399.25	477.18	4
Ldha	247.17	0.226777	0.133293	23.2729	0.000299333	0.00833307	229.145	261.562	276.772	231.519	156.755	200.547	318.564	258.861	348.558	335.569	164.325	183.868	4
Ly9	63.8439	0.160123	0.190043	23.2519	0.00030211	0.0083828	32.1607	42.081	50.4495	66.4917	76.7943	96.3414	55.8308	46.3757	48.971	61.3406	75.468	113.823	2
Neurl3	45.2278	-0.771246	0.227504	23.0985	0.000323234	0.00893964	38.5928	43.7312	41.3406	56.0773	91.8365	62.9168	24.3028	26.9822	20.1645	18.0414	63.2957	55.4521	2
Npc2	587.078	0.157668	0.118026	23.0209	0.000334475	0.00922041	494.47	492.595	447.74	650.497	718.066	495.47	495.909	494.955	472.426	630.545	893.444	758.819	2
Serpine1	22.0215	-1.5298	0.330614	22.9595	0.000343639	0.00944225	42.6129	42.9061	22.422	11.2155	25.3342	45.2215	11.1662	10.9615	11.5226	2.7062	6.08613	32.1039
Eif4a1	274.559	-0.0490185	0.124431	22.9322	0.000347789	0.00952537	333.667	402.657	292.888	255.552	197.923	202.514	287.036	321.257	290.945	289.564	195.973	224.727	3
Gbp6	7.85907	-0.675955	0.583873	22.825	0.000364582	0.00992108	1.60803	3.30047	8.40825	29.6409	11.0837	1.96615	1.9705	0	1.44032	8.11861	19.4756	7.29633	2
Ctnnb1	102.43	0.172333	0.165837	22.8276	0.000364173	0.00992108	94.874	150.171	122.62	88.1215	64.9189	57.0184	97.8681	126.479	159.876	101.032	66.9474	99.2301	3
Ikbke	22.2878	-0.586985	0.293917	22.8148	0.00036623	0.00993399	8.84418	17.3275	34.3337	31.2431	38.793	27.5261	5.25466	12.6479	18.7242	15.3352	26.779	30.6446
Gadd45a	33.0212	0.288388	0.241011	22.6213	0.000398739	0.0107812	28.1406	30.5293	18.9186	15.221	39.5847	43.2553	27.587	36.2573	18.7242	20.7476	63.2957	53.9929	1
Tnf	8.51956	-1.39365	0.580874	22.6123	0.000400305	0.0107891	6.43213	46.2066	9.80963	8.01105	3.16678	1.96615	2.62733	10.9615	0	7.21654	0	5.83707	3
Mov10	17.0155	-0.625613	0.335546	22.546	0.000412135	0.0110727	8.84418	7.42605	17.5172	33.6464	34.0428	23.5938	7.22516	7.58875	5.76129	19.8455	25.5617	13.1334	2
Ccl6	61.2835	-0.80694	0.196112	22.517	0.000417415	0.0111791	65.1254	64.3591	54.6537	56.0773	116.379	110.104	39.41	50.5916	33.1274	20.7476	62.0785	62.7485
Srsf2	55.7649	0.0496632	0.194875	22.5097	0.000418751	0.0111795	83.6177	72.6103	63.0619	48.8674	35.6262	27.5261	75.5358	73.3579	59.0532	49.6137	51.1235	29.1853	3
mt-Nd1	853.414	-0.100103	0.12056	22.3497	0.000449222	0.0119178	1060.5	1247.58	1036.32	685.746	557.352	778.596	834.178	942.691	888.679	850.65	623.219	735.47	4
Cd48	52.6442	-0.248242	0.216804	22.3547	0.000448237	0.0119178	44.2209	38.7805	55.3543	48.8674	67.294	76.6799	28.2438	25.2958	43.2097	38.7889	102.247	62.7485
Ccl2	38.1055	-1.084	0.238823	22.3115	0.000456809	0.0120812	41.0049	77.561	66.5654	56.0773	29.2927	39.323	24.3028	39.6301	33.1274	30.6703	10.955	8.7556	3
Gbp5	5.40628	-1.51842	0.749029	22.3033	0.000458455	0.0120869	0.804017	1.65023	6.30619	18.4254	10.292	3.9323	0	0	0	1.80414	15.8239	5.83707	2
Basp1	111.613	0.0329206	0.149468	22.2746	0.000464258	0.0122019	107.738	131.194	147.845	120.166	75.2109	78.646	105.093	123.106	148.353	144.331	73.0335	84.6375	4
Csf3r	6.34657	0.386769	0.554025	22.0529	0.000511612	0.0134049	0.804017	3.30047	2.80275	4.00552	10.292	9.83075	1.31367	3.37278	1.44032	5.41241	21.9101	11.6741
Akirin1	67.955	0.115482	0.182422	21.9562	0.000533723	0.013941	77.1856	107.265	55.3543	43.2597	49.8767	60.9507	97.2113	99.4969	63.3742	59.5365	45.0373	56.9114	4
Rnf114	44.5228	-0.260732	0.226311	21.9011	0.000546754	0.0142375	30.5526	28.8791	50.4495	61.6851	69.6691	43.2553	18.3913	29.5118	31.6871	38.7889	73.0335	58.3707	2
Racgap1	6.67817	0.392764	0.538356	21.8914	0.000549083	0.0142543	9.6482	10.7265	6.30619	4.00552	2.37508	0	20.3618	9.27514	7.20161	9.02068	1.21723	0
Gna15	6.20973	-0.665069	0.56454	21.8245	0.000565394	0.0146328	12.0603	14.027	12.6124	4.80663	1.58339	0	8.53883	10.9615	5.76129	2.7062	0	1.45927
Ninj1	117.731	-0.212326	0.160247	21.643	0.000612046	0.0157919	110.954	146.046	107.205	90.5248	121.921	169.089	89.3293	102.026	83.5387	65.851	149.719	176.571	1
Lipa	491.972	0.0823118	0.114469	21.3192	0.000704924	0.0181331	385.124	365.527	610.299	451.823	454.432	603.608	421.687	376.908	494.03	551.163	507.583	681.478
Lrrc25	59.6942	-0.207272	0.189982	21.3085	0.000708243	0.0181632	51.4571	39.6056	59.5585	66.4917	81.5445	78.646	33.4985	32.0414	47.5306	65.851	75.468	84.6375	1
Hmox2	77.0315	-0.245314	0.18458	21.2598	0.000723428	0.0184966	52.2611	61.8838	76.375	120.967	93.4199	90.4429	51.233	39.6301	54.7322	77.5778	102.247	103.608	2
Icam1	31.289	-0.786478	0.263147	21.0736	0.000784525	0.0199383	20.9044	86.6373	21.0206	44.8619	36.4179	31.4584	13.7935	31.1982	15.8435	23.4538	20.6928	29.1853
Myd88	23.4033	-0.221683	0.276739	21.0798	0.000782429	0.0199383	12.0603	16.5023	22.422	23.232	38.793	37.3569	9.85249	12.6479	17.2839	22.5517	38.9512	29.1853
Rapgef5	9.92503	-0.642349	0.438826	21.0527	0.000791693	0.0200602	16.8844	20.6279	10.5103	10.4144	2.37508	9.83075	11.1662	21.0799	5.76129	6.31447	1.21723	2.91853
Dab2	109.947	-0.650684	0.161765	20.8968	0.000847228	0.0212931	181.708	158.422	110.709	137.79	114.796	96.3414	122.171	115.518	61.9338	98.3254	48.689	72.9633	4
C3ar1	343.939	-0.0823958	0.122962	20.9082	0.000843043	0.0212931	274.974	273.114	348.242	417.376	441.765	353.907	277.84	226.819	324.072	320.234	429.681	439.239
Psmd8	211.377	0.297058	0.123086	20.895	0.000847898	0.0212931	188.944	212.88	233.329	217.099	155.172	131.732	248.283	266.449	272.221	263.404	199.625	147.386
Rai14	7.6061	-0.0673165	0.534489	20.8573	0.000861928	0.0215813	17.6884	16.5023	5.6055	4.00552	3.16678	0	11.1662	10.9615	14.4032	6.31447	0	1.45927	3
Ypel3	29.5045	0.0835986	0.260723	20.7646	0.000897352	0.022402	20.1004	21.453	17.5172	21.6298	52.2518	39.323	22.9892	14.3343	28.8064	27.062	60.8613	27.7261
Cdk1	14.2704	0.546476	0.370218	20.7192	0.000915201	0.0227804	18.4924	21.453	12.6124	7.20994	3.16678	7.8646	30.8711	28.6686	14.4032	12.6289	10.955	2.91853	3
H2bc4	93.4968	-0.050106	0.171649	20.6566	0.000940428	0.0233397	66.7334	88.2875	70.7695	100.939	140.13	94.3752	56.4876	70.8283	77.7774	87.5006	119.288	148.845	1
Birc5	9.34325	0.842872	0.461296	20.6328	0.000950177	0.0235127	10.4522	10.7265	7.00688	4.80663	3.16678	1.96615	19.0482	26.139	14.4032	11.7269	1.21723	1.45927
Pdia3	149.862	0.0692254	0.146496	20.4619	0.0010233	0.0252483	131.055	142.745	192.689	202.679	96.5866	116.003	143.846	132.381	155.555	230.027	135.112	119.66	4
Cd83	11.0592	-0.0268901	0.404304	20.4338	0.00103582	0.0254831	6.43213	23.1033	1.40138	7.20994	15.0422	15.7292	7.22516	17.7071	4.32097	6.31447	12.1723	16.0519	3
Cks2	7.39582	0.141972	0.515721	20.3704	0.00106467	0.0261167	12.0603	12.3768	7.70757	6.40884	0	3.9323	11.1662	17.7071	8.64193	6.31447	2.43445	0
Pml	12.6237	-0.420536	0.380044	20.1902	0.00115107	0.0281545	9.6482	3.30047	14.0138	26.4365	16.6256	15.7292	4.59783	3.37278	8.64193	18.9434	17.0412	13.1334	2
Mcm7	9.05122	0.148243	0.455289	20.1561	0.00116819	0.0284911	16.0803	11.5516	10.5103	8.01105	3.95847	0	17.0777	18.5503	11.5226	7.21654	1.21723	2.91853
Ehd1	34.4962	-1.00119	0.270229	19.945	0.00127979	0.0311233	46.633	104.79	37.1365	44.0608	22.9591	23.5938	28.2438	32.0414	20.1645	14.4331	12.1723	27.7261	3
Ehd4	76.515	-0.0953762	0.180928	19.7755	0.0013769	0.0333273	57.0852	51.1573	72.8715	104.945	102.129	82.5783	62.3991	50.5916	43.2097	83.8923	109.55	97.7709	2
Tspo	112.707	-0.376189	0.157809	19.7732	0.0013783	0.0333273	86.0298	105.615	105.804	176.243	165.464	125.834	90.6429	64.926	77.7774	119.073	138.764	96.3116
Ctdsp2	20.2486	-0.364788	0.307936	19.7238	0.00140799	0.0339482	13.6683	12.3768	12.6124	22.4309	34.8345	41.2892	16.4208	6.74555	12.9629	11.7269	31.6479	26.2668	2
Cd53	292.951	0.120688	0.12021	19.7007	0.00142209	0.0341907	224.321	269.813	241.737	283.591	311.927	336.212	227.921	254.645	249.176	296.78	407.771	411.513
Selplg	50.5827	-0.215474	0.21768	19.641	0.00145914	0.0349822	45.0249	26.4037	42.0413	61.6851	82.3362	66.8491	38.0963	37.9437	21.6048	45.1034	59.644	80.2597	2
Pld3	207.556	0.493342	0.129551	19.5207	0.00153675	0.0367388	151.959	133.669	152.75	133.784	234.341	239.87	225.951	204.896	195.884	228.223	301.872	287.476
Snord3b2	11.0685	-0.0940613	0.413746	19.5015	0.00154953	0.0369399	15.2763	20.6279	14.7144	13.6188	4.75016	0	20.3618	17.7071	8.64193	8.11861	6.08613	2.91853
Dhcr24	8.0516	0.353872	0.499221	19.4653	0.00157386	0.0374146	16.8844	9.90141	10.5103	5.60773	1.58339	0	11.1662	11.8047	8.64193	14.4331	6.08613	0	4
Tgfbi	15.6152	-0.935869	0.368336	19.4574	0.00157922	0.0374368	32.9647	37.9554	15.4151	16.0221	10.292	9.83075	17.0777	16.0207	17.2839	7.21654	7.30335	0	3
Hnrnpa2b1	124.886	0.147925	0.143176	19.4344	0.00159489	0.0375975	148.743	143.57	121.219	111.354	81.5445	104.206	166.836	162.736	145.473	128.996	87.6402	96.3116	3
Gcnt1	56.9372	-0.0308919	0.196294	19.4402	0.00159092	0.0375975	95.678	42.9061	69.3681	68.0939	38.793	33.4246	72.9085	53.1212	73.4564	55.9282	40.1684	39.4002
Evi2a	65.4929	-0.175532	0.196883	19.3626	0.00164492	0.0386678	41.0049	46.2066	69.3681	98.5359	99.7534	62.9168	36.1258	63.2396	40.329	68.5572	91.2919	68.5855	2
Igfbp4	45.7944	-0.516427	0.216069	19.3563	0.00164942	0.0386678	84.4218	84.1619	38.5378	34.4475	39.5847	45.2215	55.8308	43.8461	23.0452	31.5724	35.2995	33.5631
Tpst1	12.879	-0.712292	0.434176	19.2917	0.00169588	0.0396471	11.2562	2.47535	16.1158	28.8398	19.0007	13.7631	1.9705	4.21597	2.88064	15.3352	25.5617	13.1334
Gsn	111.331	0.0188324	0.154722	19.2293	0.00174196	0.0406122	135.879	123.768	131.029	113.757	74.4192	84.5445	124.798	131.538	128.189	142.527	82.7713	62.7485	4
Eno1b	98.8135	-0.0385417	0.188299	19.1978	0.00176567	0.0410518	98.8941	101.489	145.743	84.9171	74.4192	86.5106	120.857	99.4969	142.592	133.506	53.5579	43.778
Ccnf	3.99283	0.164536	0.691895	19.1606	0.0017941	0.0415985	3.21607	8.25117	7.70757	4.00552	0	0	6.56833	8.43194	4.32097	5.41241	0	0
Lhfpl2	52.1677	0.491049	0.211733	19.1197	0.00182594	0.0422211	57.8892	69.3098	32.9323	25.6353	33.2511	43.2553	77.5063	86.0058	77.7774	42.3972	37.734	42.3187	3
Trim34a	9.71002	0.00301802	0.454967	19.1131	0.0018311	0.0422251	1.60803	2.47535	12.6124	15.221	17.4173	9.83075	5.9115	1.68639	4.32097	16.2372	14.6067	14.5927	2
Stard3	25.4183	-0.583457	0.276994	19.0589	0.00187415	0.0430054	13.6683	17.3275	32.2316	32.8453	38.793	49.1538	10.5093	9.27514	25.9258	23.4538	32.8651	18.9705	2
Ranbp1	39.246	-0.150512	0.229139	19.0578	0.0018751	0.0430054	50.6531	60.2335	56.055	35.2486	16.6256	31.4584	53.8603	37.9437	41.7693	36.9848	19.4756	30.6446	4
Gyg	84.4885	0.521446	0.167089	19.0436	0.00188648	0.0430639	52.2611	52.8075	55.3543	88.9226	98.17	68.8153	80.1336	85.1626	76.3371	100.13	159.457	96.3116	2
Spred1	37.5157	-0.381664	0.228172	19.042	0.00188783	0.0430639	45.829	64.3591	49.0482	39.2541	17.4173	39.323	34.8121	42.1597	31.6871	37.8868	13.3895	35.0224	3
H2aw	25.997	0.327125	0.275631	18.9437	0.0019691	0.0447971	11.2562	9.90141	25.9255	41.6574	29.2927	23.5938	19.705	16.8639	23.0452	36.9848	47.4718	26.2668	2
Casp1	63.1004	-0.217646	0.201175	18.8806	0.00202307	0.0459015	44.2209	41.2559	75.6743	94.5303	82.3362	66.8491	44.6646	37.9437	36.0081	69.4592	98.5953	65.667	2
Tpx2	8.40581	0.15349	0.503571	18.8743	0.00202852	0.045902	15.2763	8.25117	6.30619	10.4144	1.58339	3.9323	9.19566	21.0799	10.0823	13.531	1.21723	0
Tnfaip3	8.60875	-0.0238208	0.457923	18.8408	0.00205788	0.0464423	4.02008	23.9284	8.40825	4.80663	4.75016	5.89845	2.62733	19.3935	7.20161	4.51034	6.08613	11.6741	3
Il15	12.8429	-0.200716	0.39351	18.7929	0.00210049	0.0471524	4.8241	4.9507	11.9117	20.0276	20.584	17.6954	6.56833	5.05916	4.32097	9.02068	24.3445	24.8075	2
Cxcl2	5.89055	-2.11473	0.695985	18.7977	0.00209621	0.0471524	0.804017	37.9554	6.30619	4.80663	6.33355	3.9323	1.31367	4.21597	1.44032	0.902068	1.21723	1.45927	3
Hspa8	462.466	0.0132773	0.112891	18.7457	0.00214337	0.0479876	350.551	344.899	543.734	527.127	486.1	519.064	385.561	366.789	495.471	573.715	539.231	417.35	2
Cd9	136.708	0.285208	0.143394	18.6756	0.00220862	0.0493182	92.4619	134.494	164.662	145	93.4199	112.071	121.514	152.618	197.324	189.434	133.895	103.608	4
Pdgfb	41.9258	-0.16354	0.213789	18.6489	0.002234	0.0497534	34.5727	71.7852	42.0413	28.0387	41.9598	47.1876	34.8121	68.2987	30.2468	24.3558	38.9512	40.8595	3
Adra1a	8.21015	0.360164	0.470056	18.6294	0.00225271	0.0499076	1.60803	2.47535	5.6055	5.60773	10.292	19.6615	3.941	4.21597	4.32097	7.21654	14.6067	18.9705
Zranb3	13.3883	0.122874	0.368855	18.6355	0.00224683	0.0499076	18.4924	12.3768	22.422	13.6188	5.54186	3.9323	16.4208	12.6479	21.6048	24.3558	4.8689	4.3778
Lsp1	44.6159	-0.415357	0.214214	18.4625	0.00241926	0.0533182	55.4772	37.1303	29.4289	42.4585	80.7528	58.9845	33.4985	26.139	24.4855	36.0827	51.1235	59.8299
Pnrc1	36.6313	-0.434401	0.242081	18.4678	0.00241385	0.0533182	19.2964	54.4577	30.8303	47.2652	46.7099	51.1199	15.764	31.1982	20.1645	26.16	57.2096	39.4002
Ptprc	46.0317	-0.140064	0.215328	18.4381	0.00244461	0.053737	29.7486	28.054	44.1433	49.6685	59.377	82.5783	24.9597	33.7278	43.2097	40.5931	68.1646	48.1558	2
Abca1	37.2418	-0.696191	0.260072	18.3874	0.00249814	0.0547714	45.0249	42.081	25.9255	41.6574	64.9189	43.2553	16.4208	25.2958	11.5226	19.8455	51.1235	59.8299
Cdkn1c	6.17447	0.617645	0.562893	18.3674	0.00251952	0.0550974	3.21607	0.825117	2.10206	3.20442	5.54186	15.7292	3.941	0.843194	4.32097	5.41241	15.8239	13.1334
Bmp2k	13.0171	-0.101724	0.397396	18.3541	0.00253389	0.0552689	23.3165	23.9284	6.30619	4.80663	6.33355	17.6954	22.3323	17.7071	11.5226	10.8248	1.21723	10.2149
Marcks	104.312	-0.446377	0.162667	18.2744	0.00262151	0.0567665	100.502	106.44	94.5929	124.171	134.588	147.461	58.4581	70.8283	69.1355	79.382	114.419	151.764	2
Pgd	122.358	0.0239542	0.156004	18.2828	0.00261208	0.0567665	118.19	130.369	198.995	84.116	83.9195	123.867	118.887	127.322	167.077	114.563	104.681	96.3116	4
Uhrf1	7.21181	-0.301977	0.526043	18.2733	0.00262267	0.0567665	8.84418	9.07629	10.5103	11.2155	1.58339	3.9323	9.19566	16.8639	7.20161	8.11861	0	0	4
Rps27rt	300.663	0.0795252	0.114892	18.1758	0.00273397	0.0590244	262.913	283.015	231.227	282.79	330.928	351.941	275.87	275.724	231.892	282.347	376.123	423.187
Gbp8	3.98241	-0.149556	0.740011	18.1498	0.00276442	0.0595301	0	0.825117	1.40138	5.60773	15.0422	3.9323	1.31367	2.52958	0	1.80414	10.955	4.3778	1
Fgd2	14.457	-0.0013208	0.368999	17.9725	0.00298109	0.0638708	12.0603	5.77582	7.70757	24.0331	19.0007	13.7631	9.85249	5.05916	5.76129	13.531	29.2134	27.7261	2
mt-Co3	1350.27	0.0279485	0.124528	17.977	0.00297537	0.0638708	1638.59	1934.9	1531.7	1158.4	871.655	1016.5	1510.06	1419.94	1372.63	1434.29	1166.1	1148.44	4
Sp140	16.269	-0.490226	0.387064	17.9293	0.00303634	0.0648902	9.6482	2.47535	13.3131	36.8508	32.4594	23.5938	7.22516	7.58875	10.0823	7.21654	24.3445	20.4297	2
mt-Atp6	1331.02	0.0718455	0.123355	17.9013	0.00307267	0.0655012	1551.75	1877.14	1524	1051.85	858.196	1045.99	1387.23	1523.65	1433.12	1390.09	1209.92	1119.26	4
Tdrd7	17.5962	-0.0379902	0.372037	17.8888	0.00308904	0.0656847	7.23615	1.65023	27.3268	32.0442	20.584	23.5938	5.25466	12.6479	12.9629	18.9434	25.5617	23.3483	2
Ctsb	4133.86	0.331116	0.0861947	17.8192	0.00318174	0.0674864	3208.83	3236.11	3311.45	3804.45	4380.44	4005.05	4075.65	3971.44	4174.05	4624	5759.91	5054.9
Rpsa	451.042	0.408163	0.109868	17.7862	0.00322668	0.0682686	445.425	432.361	440.032	401.353	301.635	306.719	614.139	585.177	524.277	540.339	464.98	356.061	4
Spp1	514.837	0.443862	0.109521	17.7689	0.0032504	0.0685988	426.933	467.016	484.175	503.895	380.805	346.043	665.372	659.378	682.713	656.705	527.059	377.95	4
Sppl2a	43.5383	0.0124006	0.254871	17.7557	0.00326874	0.0688143	17.6884	31.3545	49.0482	71.2983	59.377	29.4923	26.2733	26.9822	28.8064	41.4951	70.5991	70.0448	2
Nabp1	13.0911	-0.723397	0.409305	17.7483	0.003279	0.068859	4.8241	16.5023	11.211	14.4199	25.3342	19.6615	5.9115	5.05916	4.32097	3.60827	31.6479	14.5927	2
Timp1	21.9064	-2.21947	0.333944	17.7098	0.00333304	0.0698207	18.4924	22.2782	32.9323	35.2486	35.6262	70.7814	3.28416	5.90236	7.20161	6.31447	7.30335	17.5112
Pld4	189.866	-0.288201	0.148915	17.6688	0.00339144	0.0708685	186.532	147.696	157.655	233.121	279.468	241.837	136.621	155.991	139.711	132.604	204.494	262.668	1
Zfp36	28.5297	0.057368	0.268145	17.6378	0.00343635	0.0716301	14.4723	27.2289	19.6193	27.2376	49.8767	25.56	17.0777	16.8639	25.9258	21.6496	48.689	48.1558
Lacc1	28.8379	-0.64556	0.299432	17.6213	0.00346042	0.0719546	14.4723	24.7535	23.1227	59.2817	56.2103	31.4584	16.4208	16.8639	7.20161	22.5517	25.5617	48.1558	2
Tuba4a	12.917	0.556527	0.396405	17.5248	0.00360485	0.0747741	18.4924	14.027	18.2179	2.40331	4.75016	5.89845	13.1367	21.923	30.2468	10.8248	4.8689	10.2149
Grina	110.982	-0.243586	0.150835	17.3713	0.00384685	0.0795987	90.0499	86.6373	105.804	148.204	153.589	137.631	71.5948	85.1626	92.1806	103.738	130.243	126.956
Rtn4	254.662	-0.188951	0.120222	17.36	0.00386531	0.0797857	239.597	295.392	353.847	314.033	209.007	218.243	225.294	220.917	298.147	281.445	189.887	210.134	4
S1pr1	34.4443	-0.211091	0.252945	17.3521	0.00387831	0.0798592	63.5173	42.9061	34.3337	19.2265	21.3757	41.2892	32.1848	47.2189	44.65	18.9434	17.0412	30.6446	3
Cyp27a1	3.73318	-0.958499	0.802563	17.3331	0.00390946	0.0801186	3.21607	0	2.10206	2.40331	8.70863	9.83075	0	0.843194	0	0.902068	10.955	5.83707	1
Parp11	10.0029	-0.657875	0.427864	17.3329	0.00390984	0.0801186	5.62812	3.30047	10.5103	19.2265	24.5425	11.7969	4.59783	3.37278	5.76129	13.531	13.3895	4.3778	2
Mafg	24.1338	0.0382406	0.283295	17.2787	0.00400043	0.081777	29.7486	37.9554	31.531	12.0166	22.1674	9.83075	31.528	34.571	36.0081	18.9434	12.1723	13.1334	4
Cd69	3.32306	-2.27864	0.880491	17.2332	0.00407804	0.0831624	1.60803	6.60094	3.50344	18.4254	0.791694	1.96615	0	3.37278	0	3.60827	0	0
Psmb5	86.7422	0.142718	0.167268	17.2144	0.00411069	0.0836269	73.9695	113.866	112.811	82.5138	53.8352	60.9507	89.9861	96.1241	118.106	107.346	65.7302	65.667
Ccl7	20.1557	-1.61259	0.364095	17.2037	0.00412933	0.0838046	13.6683	51.1573	27.3268	45.663	22.9591	19.6615	8.53883	18.5503	7.20161	19.8455	0	7.29633	3
Asph	22.1259	-0.116047	0.293045	17.156	0.00421324	0.0850993	10.4522	10.7265	20.3199	28.0387	41.9598	29.4923	14.4503	14.3343	11.5226	24.3558	29.2134	30.6446	2
Actb	2258.6	-0.25312	0.109629	17.1569	0.00421172	0.0850993	2896.87	2845	2681.53	2759.81	1953.9	1667.3	2486.77	2159.42	1859.46	2256.97	1634.73	1901.42	4
Gpr65	13.9491	-0.97687	0.389265	17.1365	0.00424815	0.0855882	12.0603	10.7265	15.4151	13.6188	34.0428	19.6615	5.9115	7.58875	1.44032	3.60827	24.3445	18.9705	1
Plk2	44.2787	0.373373	0.217611	17.1311	0.00425767	0.0855882	19.2964	58.5833	48.3475	37.6519	35.6262	33.4246	37.4395	76.7307	66.2548	34.2786	48.689	35.0224	4
Msmo1	49.0392	0.100726	0.217843	17.11	0.00429576	0.0858177	55.4772	74.2605	53.953	32.0442	28.501	41.2892	50.5761	74.2011	61.9338	59.5365	30.4306	26.2668	4
Esyt1	93.403	0.297829	0.164434	17.1071	0.00430105	0.0858177	68.3414	57.7582	113.511	108.149	80.7528	76.6799	86.0451	95.2809	138.271	139.821	87.6402	68.5855
Mgst1	67.5629	0.700935	0.178284	17.1101	0.00429571	0.0858177	41.8089	37.9554	47.6468	47.2652	76.7943	55.0522	58.4581	69.9851	79.2177	68.5572	130.243	97.7709
Tmem184b	38.1447	-0.119869	0.225275	17.1024	0.00430964	0.0858177	30.5526	17.3275	43.4427	60.884	46.7099	41.2892	28.9007	21.923	31.6871	49.6137	40.1684	45.2373
H2-Q4	7.50689	-1.37443	0.564831	17.042	0.0044208	0.0876877	1.60803	7.42605	7.00688	8.81215	14.2505	21.6277	2.62733	1.68639	1.44032	0	6.08613	17.5112	1
Prcp	20.5991	-0.081175	0.31058	17.0402	0.00442427	0.0876877	16.0803	14.8521	11.211	25.6353	29.2927	23.5938	9.19566	9.27514	14.4032	18.9434	42.6029	32.1039
Dgkz	46.8624	0.316458	0.222188	17.0289	0.0044454	0.0876956	55.4772	48.6819	39.2385	40.0552	35.6262	25.56	82.761	71.6715	67.6951	40.5931	24.3445	30.6446	3
Cks1b	10.2722	0.830697	0.480898	17.0322	0.00443904	0.0876956	18.4924	13.2019	10.5103	1.60221	0.791694	3.9323	21.0187	8.43194	21.6048	14.4331	4.8689	4.3778	4
H2-M3	17.8948	-0.730697	0.328416	17.0225	0.00445727	0.0877254	7.23615	18.9777	17.5172	32.8453	31.6678	23.5938	5.25466	10.1183	8.64193	15.3352	15.8239	27.7261
Itga5	43.8864	-0.275567	0.231001	16.9876	0.00452329	0.0888181	46.633	84.9871	44.1433	36.8508	34.0428	39.323	49.9193	53.1212	60.4935	21.6496	21.9101	33.5631	3
Grem1	7.03967	-2.246	0.594937	16.9613	0.00457371	0.0896002	4.8241	1.65023	11.211	12.0166	17.4173	21.6277	1.31367	0	2.88064	1.80414	2.43445	7.29633
mt-Rnr2	13511	-0.296948	0.154145	16.886	0.0047211	0.092274	12965.6	14704.4	13918.5	14108.3	15997	14673.4	9246.24	8506.14	8453.25	10170.8	17559.7	21829.2	2
Lgmn	129.629	0.00585491	0.146549	16.8487	0.00479577	0.0935175	149.547	131.194	77.7764	116.16	161.506	137.631	132.68	135.754	86.4193	112.758	137.546	176.571	1
Rpl10a	252.47	0.25249	0.126901	16.7976	0.00490006	0.0953316	261.305	332.522	242.438	200.276	195.548	159.258	331.044	315.355	262.139	267.914	238.576	223.268	4
Slc28a2	13.0322	0.232018	0.373852	16.7921	0.00491143	0.0953335	3.21607	6.60094	10.5103	24.8342	22.1674	7.8646	7.882	8.43194	11.5226	20.7476	19.4756	13.1334	2
Relb	14.9016	-0.838221	0.372891	16.7637	0.00497048	0.0962589	8.04017	32.1796	9.80963	14.4199	22.1674	25.56	5.25466	10.9615	5.76129	4.51034	25.5617	14.5927
Slc38a2	13.205	0.0669307	0.394775	16.7322	0.00503669	0.0973184	8.04017	26.4037	10.5103	7.20994	7.91694	15.7292	13.1367	30.355	20.1645	9.02068	1.21723	8.7556
Eng	27.1257	-0.251906	0.296398	16.7265	0.00504876	0.0973295	15.2763	14.8521	26.6261	49.6685	45.1265	23.5938	9.85249	22.7662	17.2839	18.9434	45.0373	36.4817	2
Ogfr	26.616	-0.291884	0.27778	16.7032	0.00509857	0.0980663	16.0803	9.90141	28.0275	45.663	34.0428	47.1876	15.1072	15.1775	23.0452	21.6496	32.8651	30.6446	2
Cd86	7.95003	-0.758045	0.507015	16.6746	0.00516012	0.0990252	4.02008	4.12559	4.20413	16.8232	18.209	9.83075	2.62733	2.52958	1.44032	3.60827	13.3895	14.5927	2
Irf9	20.9087	-0.325941	0.35954	16.5772	0.00537556	0.102926	12.0603	14.027	32.2316	22.4309	31.6678	15.7292	5.9115	5.90236	7.20161	29.7682	38.9512	35.0224	2
Atp6v0d2	99.2046	0.609639	0.155922	16.5423	0.00545486	0.104209	69.1454	66.8345	63.7626	56.8784	109.254	110.104	101.152	104.556	99.3822	106.444	149.719	153.223
Soat1	151.134	0.462725	0.13689	16.5226	0.00550015	0.104837	94.874	99.8392	111.409	131.381	168.631	163.19	141.876	140.813	165.637	187.63	228.838	179.49
Pclaf	7.31721	0.0478007	0.509579	16.4496	0.00567107	0.107593	5.62812	14.8521	9.80963	7.20994	1.58339	3.9323	11.823	12.6479	10.0823	9.02068	1.21723	0	4
Knstrn	4.19703	0.198622	0.668693	16.4527	0.00566381	0.107593	8.84418	5.77582	4.90482	1.60221	1.58339	0	9.85249	8.43194	5.76129	3.60827	0	0
Smad6	5.44794	0.216099	0.597682	16.4446	0.00568285	0.107593	10.4522	8.25117	6.30619	2.40331	0.791694	1.96615	15.1072	5.90236	5.76129	7.21654	1.21723	0
Plp2	80.8017	-0.095827	0.173684	16.4116	0.00576219	0.108851	91.6579	98.1889	105.804	77.7072	56.2103	70.7814	88.6724	93.5946	97.9419	95.6192	51.1235	42.3187	4
Btg1	58.9707	-0.423317	0.214957	16.3545	0.00590159	0.111236	43.4169	85.8122	54.6537	62.4862	78.3777	68.8153	31.528	41.3165	27.3661	43.2993	88.8575	81.7189
Nme1	50.3406	0.0889329	0.217517	16.2889	0.00606577	0.114077	36.1808	70.135	56.055	56.0773	32.4594	39.323	65.0265	73.3579	63.3742	53.222	19.4756	39.4002	4
Itgam	29.1983	-0.0202909	0.256329	16.2808	0.00608655	0.114214	37.7888	47.8568	24.5241	24.8342	19.7923	21.6277	42.0373	42.1597	34.5677	25.2579	18.2584	11.6741	4
Ccnb2	5.47131	0.0637431	0.57863	16.2435	0.00618219	0.115752	9.6482	5.77582	9.10894	5.60773	1.58339	0	11.1662	10.9615	5.76129	3.60827	2.43445	0
Plk3	5.52382	-0.744882	0.603733	16.1928	0.00631468	0.117972	15.2763	9.07629	2.10206	3.20442	3.95847	5.89845	12.4798	7.58875	2.88064	0.902068	0	2.91853	3
Fcgr3	156.49	0.0549175	0.13886	16.1861	0.00633233	0.118041	211.456	184.001	135.933	154.613	102.92	137.631	192.452	175.384	151.234	180.414	127.809	124.038
Eif5a	198.228	-0.0276995	0.135285	16.1749	0.00636196	0.118333	208.24	264.863	244.54	178.646	133.005	176.954	208.873	201.523	236.213	221.007	139.981	164.897	4
Ccl5	4.54447	-1.77369	0.745097	16.1595	0.0064031	0.118837	2.41205	2.47535	1.40138	9.61326	15.0422	7.8646	0	0	1.44032	0.902068	6.08613	7.29633	1
Il17ra	11.7795	-0.361167	0.39488	16.1055	0.00654916	0.121281	19.2964	25.5786	11.211	8.81215	6.33355	7.8646	15.764	16.8639	15.8435	7.21654	3.65168	2.91853	3
Sqstm1	387.604	-0.0104113	0.12594	16.0191	0.00678961	0.125186	319.195	601.51	369.963	310.028	358.637	391.264	331.701	435.088	442.179	297.682	424.812	369.194	3
Tmem221	7.32084	-0.231725	0.51063	16.0225	0.00678002	0.125186	4.8241	2.47535	4.90482	10.4144	15.8339	5.89845	3.941	0.843194	1.44032	11.7269	10.955	14.5927
Gdf15	41.5936	0.755769	0.236005	15.9452	0.00700228	0.128827	25.7285	57.7582	28.7282	20.0276	27.7093	25.56	59.115	83.4762	23.0452	39.691	57.2096	51.0743	3
Cyba	604.488	0.00816996	0.105739	15.9238	0.007065	0.129288	504.118	537.976	588.578	578.398	696.691	694.051	524.81	494.955	506.993	614.308	720.598	792.382	2
Mat2a	23.3576	-0.495819	0.281931	15.921	0.00707319	0.129288	39.3968	40.4307	25.9255	16.0221	17.4173	23.5938	26.9302	32.0414	14.4032	8.11861	17.0412	18.9705	3
Gm49339	172.949	-0.337558	0.137739	15.9302	0.0070463	0.129288	145.527	190.602	264.159	215.497	159.13	186.784	147.131	149.245	201.645	184.022	111.985	119.66	4
Slc15a4	23.3154	-0.0590617	0.28575	15.8966	0.00714557	0.130049	12.0603	14.027	22.422	18.4254	43.5432	35.3907	17.0777	10.1183	21.6048	25.2579	29.2134	30.6446	2
Emp3	253.305	0.11128	0.121255	15.8982	0.0071408	0.130049	250.049	271.464	325.119	245.138	190.798	182.852	278.497	265.606	308.229	299.487	209.363	213.053
Ccrl2	11.6361	-0.598838	0.391933	15.8888	0.00716887	0.130193	4.02008	19.8028	9.10894	20.0276	16.6256	13.7631	1.9705	16.0207	7.20161	9.92275	10.955	10.2149	1
Axl	12.4203	-0.833475	0.384745	15.8395	0.0073177	0.132328	11.2562	4.9507	11.211	20.8287	22.9591	23.5938	5.25466	3.37278	5.76129	9.92275	18.2584	11.6741	1
Tgm2	65.7061	-0.462236	0.201168	15.8428	0.00730747	0.132328	116.582	121.292	46.2454	64.8895	64.1272	49.1538	71.5948	61.5532	57.6129	41.4951	48.689	45.2373	3
Zfas1	21.5543	0.241674	0.302718	15.7992	0.00744145	0.134119	8.84418	9.07629	16.1158	22.4309	36.4179	29.4923	15.1072	21.923	12.9629	19.8455	40.1684	26.2668	2
Atp1a1	81.2705	-0.177799	0.169248	15.7969	0.00744839	0.134119	110.15	88.2875	91.0894	88.1215	59.377	78.646	103.123	88.5354	92.1806	79.382	43.8201	52.5336	4
Adssl1	18.609	0.389232	0.312282	15.7862	0.00748179	0.134434	23.3165	24.7535	16.1158	13.6188	15.0422	3.9323	30.8711	25.2958	27.3661	22.5517	14.6067	5.83707
Gas6	136.372	0.399801	0.142831	15.6963	0.00776678	0.138965	164.019	141.92	88.9874	108.149	91.0448	116.003	189.825	188.032	119.547	157.862	141.198	129.875
Syce2	5.76597	-0.134613	0.553281	15.6993	0.00775715	0.138965	7.23615	10.7265	10.5103	5.60773	2.37508	0	9.85249	9.27514	5.76129	5.41241	2.43445	0
Nupr1	13.8709	-0.270967	0.36029	15.6288	0.00798774	0.142617	7.23615	18.9777	8.40825	8.01105	24.5425	23.5938	5.25466	13.4911	11.5226	7.21654	13.3895	24.8075
Zfp36l1	19.0698	-0.588574	0.345757	15.5552	0.00823567	0.146734	17.6884	14.8521	12.6124	28.8398	39.5847	15.7292	9.19566	7.58875	7.20161	10.8248	26.779	37.9409	1
Creld2	13.3806	0.318058	0.376994	15.5478	0.00826113	0.146878	5.62812	5.77582	25.9255	16.8232	13.4588	5.89845	11.823	13.4911	30.2468	17.1393	8.52058	5.83707
Adar	18.3545	-0.251876	0.311671	15.5255	0.00833774	0.147929	11.2562	9.07629	20.3199	21.6298	27.7093	29.4923	10.5093	8.43194	10.0823	18.9434	27.9962	24.8075	2
Mrc1	49.7339	-0.158745	0.207371	15.4742	0.00851714	0.150796	77.1856	65.1843	30.8303	64.8895	38.0013	39.323	63.056	61.5532	31.6871	39.691	40.1684	45.2373	4
Daglb	25.7926	-0.231836	0.273637	15.347	0.00897804	0.158625	21.7085	23.1033	19.6193	22.4309	38.793	37.3569	18.3913	12.6479	14.4032	20.7476	51.1235	29.1853
2410006H16Rik	25.6262	-0.240804	0.277588	15.3373	0.00901418	0.158931	28.1406	20.6279	13.3131	24.0331	43.5432	33.4246	25.6165	12.6479	17.2839	14.4331	29.2134	45.2373	1
Marchf5	46.6292	-0.129651	0.214929	15.2799	0.00923101	0.162416	26.5326	33.0047	49.0482	68.895	57.7936	58.9845	33.4985	34.571	25.9258	58.6344	57.2096	55.4521	2
Fbxw17	11.5988	-0.398748	0.408646	15.261	0.00930338	0.163011	5.62812	2.47535	18.2179	20.8287	21.3757	11.7969	5.25466	4.21597	8.64193	10.8248	10.955	18.9705
Tm7sf2	9.25743	-0.0613484	0.434274	15.2625	0.00929774	0.163011	16.0803	16.5023	11.211	7.20994	3.95847	1.96615	12.4798	13.4911	14.4032	7.21654	3.65168	2.91853
Ski	34.1647	-0.0783401	0.246173	15.2296	0.00942521	0.164805	66.7334	37.1303	31.531	23.232	27.7093	25.56	44.0078	47.2189	25.9258	19.8455	37.734	23.3483
Nusap1	4.07954	0.257201	0.677592	15.1591	0.00970367	0.169324	6.43213	4.9507	5.6055	3.20442	0.791694	0	10.5093	10.1183	4.32097	1.80414	1.21723	0
Atf3	93.8853	0.39864	0.165156	15.1247	0.00984262	0.171096	45.829	116.342	76.375	64.8895	101.337	88.4768	82.761	127.322	112.345	86.5985	111.985	112.364
Gnas	278.125	0.136343	0.11884	15.124	0.00984563	0.171096	215.476	235.983	248.044	307.624	292.927	281.16	233.833	217.544	270.781	351.806	370.037	312.283
Cycs	78.2583	-0.0344073	0.174668	15.091	0.00998051	0.173084	76.3816	80.8615	85.4839	102.541	54.6269	72.7476	84.7315	96.9673	93.6209	93.8151	38.9512	58.3707
Chst12	18.3697	-0.161457	0.312459	15.0014	0.0103562	0.179233	13.6683	5.77582	28.0275	20.0276	22.9591	27.5261	15.764	6.74555	15.8435	17.1393	20.6928	26.2668
Havcr2	17.7267	0.454662	0.328415	14.9305	0.0106636	0.184176	24.9245	17.3275	15.4151	10.4144	10.292	9.83075	32.1848	23.6094	36.0081	17.1393	9.7378	5.83707	4
Tmem154	20.9109	0.558214	0.310965	14.9226	0.0106983	0.184398	21.7085	17.3275	18.9186	17.6243	13.4588	9.83075	41.3805	32.8846	23.0452	36.9848	13.3895	4.3778
Fam20c	79.6721	-0.108979	0.177598	14.9054	0.0107741	0.185329	77.9896	131.194	110.709	70.4972	49.8767	62.9168	71.5948	93.5946	86.4193	70.3613	68.1646	62.7485	4
Glrx	37.7794	-0.316278	0.241515	14.8952	0.0108197	0.185734	38.5928	56.9331	75.6743	43.2597	25.3342	15.7292	35.469	33.7278	41.7693	36.9848	20.6928	29.1853
Snord3b3	10.6254	0.162815	0.425521	14.8762	0.0109045	0.186811	12.0603	12.3768	17.5172	10.4144	3.16678	3.9323	26.9302	10.1183	12.9629	9.02068	6.08613	2.91853
Gm28437	477.938	-0.00311138	0.136065	14.865	0.010955	0.187297	542.711	684.847	616.605	398.149	296.093	381.433	479.488	506.76	501.232	497.941	412.639	417.35	4
C1qa	45.4245	-0.695329	0.221858	14.8164	0.0111762	0.19031	56.2812	51.1573	40.6399	44.8619	53.0435	86.5106	36.1258	41.3165	24.4855	27.9641	17.0412	65.667	1
Idnk	17.2602	-0.470428	0.341414	14.818	0.0111692	0.19031	12.8643	8.25117	22.422	20.0276	28.501	23.5938	6.56833	9.27514	7.20161	11.7269	23.1273	33.5631
Sgk1	23.4252	-0.498772	0.287885	14.7721	0.011382	0.193426	36.9848	47.8568	21.0206	25.6353	19.7923	11.7969	19.705	37.9437	14.4032	12.6289	15.8239	17.5112
Tor1aip2	57.809	-0.0818266	0.193416	14.695	0.0117484	0.199251	36.1808	38.7805	69.3681	76.906	75.2109	62.9168	40.7236	43.8461	44.65	73.9696	66.9474	64.2077
Tnip3	6.3978	-0.617637	0.542754	14.6195	0.0121179	0.205108	0.804017	16.5023	14.7144	3.20442	9.50033	3.9323	1.31367	6.74555	7.20161	3.60827	4.8689	4.3778	3
Cdc20	4.3269	0.397527	0.691478	14.573	0.0123513	0.208225	5.62812	5.77582	4.20413	0.801105	0.791694	3.9323	8.53883	11.8047	8.64193	1.80414	0	0
Engase	5.3299	0.191465	0.612125	14.5772	0.0123304	0.208225	2.41205	2.47535	1.40138	3.20442	8.70863	9.83075	0	1.68639	4.32097	6.31447	13.3895	10.2149
Rap2a	29.1	0.177259	0.264215	14.5614	0.0124106	0.20863	49.849	38.7805	21.7213	20.8287	20.584	13.7631	38.7531	38.7869	41.7693	26.16	20.6928	17.5112	3
Trim59	3.48266	0.591007	0.728092	14.5538	0.0124493	0.20863	4.8241	5.77582	4.90482	1.60221	0	0	6.56833	8.43194	5.76129	2.7062	1.21723	0
Ufl1	5.56105	-0.020475	0.579057	14.5555	0.0124407	0.20863	5.62812	6.60094	12.6124	2.40331	5.54186	0	9.19566	8.43194	11.5226	0.902068	2.43445	1.45927
Hk3	64.6828	0.584135	0.187548	14.5465	0.0124865	0.20884	38.5928	45.3814	77.7764	57.6795	49.085	43.2553	70.2811	80.1034	110.905	99.2275	57.2096	46.6965
Marchf1	15.5487	-0.242145	0.356137	14.5308	0.0125672	0.209775	8.04017	9.07629	11.9117	21.6298	23.7508	23.5938	13.1367	5.05916	8.64193	9.92275	18.2584	33.5631
Gadd45b	18.8958	0.513583	0.314432	14.5128	0.01266	0.210572	11.2562	27.2289	7.70757	13.6188	14.2505	17.6954	23.646	31.1982	5.76129	16.2372	23.1273	35.0224
Pimreg	3.71566	0.305666	0.710111	14.5071	0.0126895	0.210572	3.21607	7.42605	5.6055	2.40331	0.791694	0	7.882	8.43194	4.32097	4.51034	0	0
Zfp622	22.6665	-0.310234	0.297073	14.5078	0.0126862	0.210572	20.1004	20.6279	20.3199	16.0221	21.3757	51.1199	13.1367	17.7071	17.2839	8.11861	34.0823	32.1039
Igsf6	14.0852	-0.802706	0.385425	14.4848	0.0128062	0.212092	8.04017	15.6772	21.0206	12.0166	21.3757	23.5938	3.28416	4.21597	5.76129	9.02068	23.1273	21.889
Rhog	91.9346	-0.265814	0.172498	14.4759	0.0128531	0.212453	82.8137	95.7136	79.1777	106.547	117.171	108.138	63.7128	62.3964	59.0532	73.9696	129.026	125.497	1
Gpr84	5.24816	-1.16649	0.649591	14.4658	0.0129061	0.212912	4.02008	21.453	11.211	2.40331	4.75016	0	1.31367	5.90236	7.20161	1.80414	0	2.91853
Trp53inp1	25.7609	-0.260514	0.266347	14.4437	0.0130237	0.214018	24.1205	15.6772	25.9255	34.4475	44.3349	21.6277	19.0482	10.1183	20.1645	27.9641	36.5168	29.1853	2
Hyou1	15.8305	0.396648	0.336866	14.4459	0.0130116	0.214018	11.2562	10.7265	29.4289	11.2155	10.292	9.83075	17.0777	12.6479	34.5677	23.4538	12.1723	7.29633	4
Fmnl3	11.4696	-0.0557894	0.398191	14.3489	0.0135386	0.222049	23.3165	12.3768	8.40825	5.60773	6.33355	13.7631	18.3913	18.5503	7.20161	8.11861	2.43445	13.1334
Tor1aip1	61.074	-0.409026	0.209826	14.2992	0.0138164	0.226166	45.0249	50.3321	68.6674	100.939	91.8365	57.0184	29.5575	50.5916	34.5677	55.9282	68.1646	80.2597	2
Stk17b	30.3487	-0.990634	0.255191	14.2829	0.0139087	0.227238	32.9647	29.7042	26.6261	38.453	49.085	62.9168	19.0482	10.1183	15.8435	17.1393	24.3445	37.9409
Tmpo	15.6824	0.354337	0.343394	14.2663	0.0140035	0.228345	18.4924	19.8028	14.0138	11.2155	8.70863	7.8646	26.9302	30.355	21.6048	15.3352	3.65168	10.2149
Hpse	69.0251	0.699573	0.191487	14.2312	0.0142057	0.231197	44.2209	34.6549	37.8371	69.6961	68.0857	60.9507	78.1631	75.8875	54.7322	72.1654	132.678	99.2301
C5ar1	62.6591	-1.1529	0.205939	14.1921	0.0144341	0.234463	123.819	128.718	70.7695	54.4751	75.2109	64.883	47.9488	41.3165	37.4484	24.3558	30.4306	52.5336
Ppia	613.12	0.0422833	0.102373	14.1675	0.0145796	0.236375	598.992	716.202	664.252	602.431	540.727	497.436	664.715	715.872	691.355	676.551	516.104	472.802	4
AC159819.1	12.3063	0.37904	0.378413	14.149	0.0146901	0.237711	20.9044	14.027	10.5103	11.2155	3.95847	3.9323	19.0482	21.0799	15.8435	13.531	4.8689	8.7556
Hmgb1	79.5321	-0.0882483	0.167567	14.1005	0.0149832	0.24199	103.718	115.516	71.4702	65.6906	66.5023	68.8153	98.5249	97.8105	57.6129	62.2427	70.5991	75.8819
Srxn1	71.948	0.123021	0.197044	14.0768	0.015129	0.243879	69.1454	89.1126	112.11	46.4641	37.2096	64.883	65.6833	60.71	99.3822	68.5572	59.644	90.4745	4
Actr3	180.379	-0.0721625	0.134921	14.0666	0.0151917	0.244425	146.331	159.248	175.873	197.072	213.757	206.446	130.71	151.775	148.353	194.847	178.932	261.209
Acat2	7.21225	0.170749	0.511956	14.0396	0.0153596	0.246658	9.6482	13.2019	9.10894	7.20994	1.58339	0	9.19566	6.74555	17.2839	7.21654	2.43445	2.91853
Mcm5	9.61714	0.0481806	0.462543	14.0235	0.0154609	0.247814	10.4522	8.25117	13.3131	16.0221	4.75016	1.96615	19.705	17.7071	10.0823	9.02068	1.21723	2.91853
Gm10184	19.0607	0.296665	0.305769	13.972	0.0157882	0.252581	26.5326	19.8028	20.3199	15.221	11.8754	7.8646	30.2143	31.1982	28.8064	13.531	14.6067	8.7556
Lsm2	11.1036	0.175647	0.401515	13.9509	0.0159244	0.25428	16.0803	18.9777	12.6124	9.61326	6.33355	0	19.705	12.6479	12.9629	12.6289	7.30335	4.3778
Ncf4	115.306	-0.235684	0.14581	13.8562	0.0165493	0.26376	87.6378	96.5387	147.144	130.58	148.047	139.597	76.1926	91.9082	119.547	101.934	120.505	124.038
Nlrc5	9.33708	-0.455938	0.436248	13.7772	0.0170881	0.271836	6.43213	2.47535	14.7144	17.6243	15.8339	7.8646	3.28416	3.37278	7.20161	13.531	10.955	8.7556
Syncrip	28.3538	0.0721138	0.25234	13.7484	0.0172891	0.274518	34.5727	42.081	30.1296	22.4309	16.6256	19.6615	32.1848	42.1597	38.8887	25.2579	15.8239	20.4297	4
Tnip1	32.4756	-0.618446	0.244886	13.726	0.017447	0.276505	24.9245	65.1843	22.422	37.6519	37.2096	51.1199	18.3913	30.355	15.8435	27.9641	27.9962	30.6446
Lamp2	196.56	-0.0018344	0.131558	13.6901	0.0177023	0.280027	150.351	151.822	183.58	222.707	247.008	228.073	175.374	173.698	156.995	188.532	247.097	233.483	2
Gm6169	10.7994	0.00408236	0.403085	13.6456	0.0180244	0.28459	15.2763	7.42605	17.5172	16.8232	6.33355	1.96615	18.3913	10.1183	12.9629	13.531	4.8689	4.3778
Ifrd1	26.0682	-0.273876	0.272783	13.6366	0.0180902	0.285098	20.9044	40.4307	28.7282	26.4365	22.1674	27.5261	14.4503	48.0621	28.8064	14.4331	14.6067	26.2668
Mgst3	53.4192	0.420894	0.192875	13.6213	0.0182026	0.286336	45.0249	47.0317	63.7626	48.8674	31.6678	37.3569	59.7718	62.3964	90.7403	72.1654	41.3857	40.8595
Idi1	13.8887	-0.271891	0.381161	13.6134	0.0182611	0.286723	20.1004	26.4037	16.1158	11.2155	7.91694	7.8646	11.1662	20.2367	14.4032	23.4538	4.8689	2.91853
Bcl3	8.48412	-0.622242	0.461981	13.6051	0.0183225	0.287154	4.8241	23.9284	4.20413	10.4144	11.0837	7.8646	4.59783	11.8047	1.44032	6.31447	10.955	4.3778
Mvb12b	17.9261	-0.0249871	0.312506	13.5963	0.018388	0.287281	28.9446	24.7535	17.5172	12.8177	6.33355	19.6615	28.2438	20.2367	17.2839	13.531	9.7378	16.0519
Pkn1	37.5666	-0.0861714	0.22463	13.5903	0.0184324	0.287281	33.7687	22.2782	47.6468	39.2541	41.1681	45.2215	30.8711	16.8639	44.65	32.4744	49.9062	46.6965
Rnase4	34.0046	-0.155149	0.247149	13.5945	0.0184007	0.287281	57.0852	44.5563	28.7282	26.4365	35.6262	21.6277	37.4395	49.7485	41.7693	20.7476	26.779	17.5112
Dusp4	4.06167	0.206401	0.715487	13.5813	0.0184996	0.287798	1.60803	10.7265	4.90482	4.00552	0	1.96615	7.22516	10.9615	4.32097	1.80414	1.21723	0
Herc4	9.77852	0.296878	0.456059	13.5739	0.0185551	0.287839	3.21607	2.47535	7.70757	9.61326	11.8754	17.6954	9.19566	3.37278	11.5226	2.7062	21.9101	16.0519
Tmem256	95.2367	0.309503	0.163449	13.5719	0.0185703	0.287839	114.17	96.5387	84.7832	84.9171	63.3355	66.8491	116.259	127.322	112.345	130.8	82.7713	62.7485
Grn	640.324	-0.0731641	0.11149	13.5273	0.0189083	0.292543	603.817	473.617	567.557	845.967	782.194	690.119	593.12	534.585	566.047	632.35	699.905	694.611	2
Nr1d1	2.9412	-0.469227	0.816196	13.4741	0.019319	0.298352	8.04017	0	0.700688	4.80663	1.58339	5.89845	2.62733	0	0	3.60827	3.65168	4.3778
Eif4g2	138.09	0.0309007	0.140238	13.4602	0.0194274	0.29948	144.723	143.57	159.757	104.945	104.504	163.19	140.562	157.677	184.361	104.64	111.985	137.171	4
BC028528	24.3724	0.0596139	0.28129	13.4551	0.0194675	0.299552	16.8844	13.2019	22.422	31.2431	34.8345	21.6277	17.0777	12.6479	28.8064	18.0414	45.0373	30.6446
Maf	95.5731	-0.238543	0.177931	13.4439	0.0195561	0.299854	119.798	60.2335	112.811	96.1326	134.588	94.3752	82.1041	58.1804	57.6129	106.444	118.071	106.526	2
Canx	134.231	-0.0183288	0.139446	13.4347	0.0196289	0.299854	127.035	112.216	159.056	175.442	108.462	127.8	134.651	115.518	149.793	168.687	94.9436	137.171
Cfp	192.253	-0.579813	0.140571	13.4406	0.019582	0.299854	252.461	259.087	206.002	181.05	224.049	245.769	170.777	161.893	103.703	107.346	178.932	215.971
Trf	47.4379	-0.411078	0.222583	13.4369	0.0196109	0.299854	72.3615	60.2335	44.1433	28.8398	49.085	66.8491	37.4395	32.8846	43.2097	19.8455	55.9924	58.3707
Rnf128	55.7526	0.463826	0.197944	13.4208	0.0197386	0.300987	46.633	42.081	76.375	45.663	36.4179	31.4584	55.8308	51.4348	95.0613	73.9696	42.6029	71.5041	4
Tsen15	5.82998	0.412977	0.538522	13.4143	0.0197911	0.301244	9.6482	4.9507	6.30619	3.20442	5.54186	0	9.85249	5.90236	11.5226	4.51034	8.52058	0
Bhlhe40	14.5639	0.948605	0.367498	13.4019	0.0198903	0.302083	13.6683	14.027	6.30619	9.61326	6.33355	7.8646	30.8711	39.6301	15.8435	9.92275	13.3895	7.29633	3
Nuf2	3.28602	0.20423	0.74849	13.3985	0.0199175	0.302083	4.8241	4.9507	4.90482	1.60221	0	1.96615	6.56833	7.58875	4.32097	2.7062	0	0
Prdx6	57.2743	-0.0135076	0.196749	13.3622	0.020211	0.305985	41.0049	73.4354	77.7764	61.6851	49.085	41.2892	53.8603	57.3372	90.7403	62.2427	36.5168	42.3187
Laptm4a	179.869	-0.110682	0.129546	13.3562	0.0202596	0.306173	167.235	181.526	143.641	197.072	224.049	204.48	165.522	164.423	120.987	174.099	237.359	178.031	2
Cdca8	5.09032	0.386275	0.62742	13.3448	0.0203531	0.306491	7.23615	9.90141	4.90482	1.60221	2.37508	0	12.4798	12.6479	0	3.60827	4.8689	1.45927
Rabac1	92.4937	0.00253367	0.160496	13.3464	0.0203405	0.306491	82.0097	76.7359	89.6881	79.3094	101.337	119.935	74.879	64.926	87.8596	78.4799	127.809	126.956
Epb41l2	19.6247	-0.211249	0.330811	13.3252	0.0205147	0.308085	32.1607	31.3545	15.4151	13.6188	17.4173	13.7631	29.5575	23.6094	31.6871	13.531	6.08613	7.29633	3
Dusp1	12.8832	-0.70365	0.390923	13.3231	0.0205317	0.308085	8.04017	11.5516	16.1158	16.8232	38.0013	5.89845	3.28416	6.74555	8.64193	14.4331	13.3895	11.6741
Tsc22d3	29.1534	0.119666	0.264641	13.3081	0.0206561	0.309402	24.1205	17.3275	13.3131	35.2486	41.9598	35.3907	22.3323	24.4526	23.0452	21.6496	41.3857	49.6151	2
Cirbp	17.8574	-0.514222	0.320956	13.2732	0.0209489	0.312682	29.7486	30.5293	18.2179	13.6188	22.1674	9.83075	20.3618	28.6686	10.0823	7.21654	12.1723	11.6741
Pbk	4.07812	0.432431	0.696168	13.2741	0.0209413	0.312682	5.62812	4.9507	2.10206	3.20442	2.37508	0	9.19566	10.1183	1.44032	9.92275	0	0
Npy	122.99	-0.0373684	0.154938	13.2582	0.0210754	0.314016	97.286	112.216	165.362	151.409	102.92	119.935	128.082	112.988	139.711	166.883	82.7713	96.3116
Hmgb2	23.1745	0.000131454	0.281223	13.2087	0.0214994	0.31977	30.5526	29.7042	19.6193	30.442	14.2505	13.7631	26.9302	39.6301	14.4032	28.8662	18.2584	11.6741
Ccn2	17.4897	-1.264	0.332159	13.2	0.0215751	0.320334	38.5928	30.5293	17.5172	10.4144	19.7923	31.4584	13.7935	13.4911	5.76129	5.41241	8.52058	14.5927
Atox1	191.79	-0.179043	0.132548	13.1794	0.0217545	0.322279	152.763	175.75	194.791	192.265	254.925	253.633	152.385	139.127	164.197	203.867	188.67	229.105
Fcgr2b	23.5547	-0.993224	0.2981	13.1751	0.0217923	0.322279	35.3767	45.3814	14.0138	24.0331	35.6262	29.4923	15.764	16.0207	5.76129	10.8248	18.2584	32.1039
Serp1	86.6635	-0.0803985	0.1691	13.1719	0.0218204	0.322279	71.5575	68.4847	93.1915	92.9281	100.545	102.24	59.115	60.71	93.6209	77.5778	133.895	86.0967
Cst3	556.891	-0.0230142	0.105035	13.0537	0.0228803	0.337345	509.747	528.075	504.495	565.58	665.023	578.048	482.772	510.976	452.261	522.297	738.856	624.566	1
Ccne2	3.85032	0.320941	0.672012	13.0464	0.0229476	0.337749	4.8241	4.9507	7.70757	2.40331	0.791694	0	5.25466	5.90236	8.64193	4.51034	1.21723	0
Clec4e	13.07	-1.77598	0.418765	13.0221	0.023173	0.340473	9.6482	48.6819	21.0206	16.0221	19.0007	7.8646	2.62733	8.43194	8.64193	5.41241	3.65168	5.83707
Ets2	12.0993	-0.699007	0.389761	12.9981	0.0233967	0.343166	12.0603	29.7042	19.6193	14.4199	8.70863	5.89845	12.4798	14.3343	12.9629	7.21654	4.8689	2.91853	3
Mapk14	33.2003	0.0146523	0.241653	12.9206	0.0241344	0.351548	38.5928	12.3768	37.8371	41.6574	39.5847	29.4923	31.528	19.3935	31.6871	46.9075	32.8651	36.4817	2
P2ry14	6.82766	-0.463403	0.537715	12.9219	0.0241218	0.351548	1.60803	4.9507	4.20413	13.6188	13.4588	7.8646	3.28416	1.68639	1.44032	4.51034	12.1723	13.1334	2
Atf4	59.2464	0.340913	0.238881	12.925	0.0240914	0.351548	29.7486	67.6596	43.4427	69.6961	29.2927	78.646	74.879	111.302	69.1355	59.5365	35.2995	42.3187
Tmem106a	116.427	0.298455	0.153172	12.9237	0.0241046	0.351548	74.7736	80.8615	100.899	118.563	140.13	116.003	108.377	120.577	99.3822	150.645	171.629	115.282
Myo1g	33.4058	-0.126036	0.236377	12.8858	0.0244723	0.355858	23.3165	18.9777	32.9323	44.0608	49.085	43.2553	26.9302	17.7071	36.0081	36.0827	38.9512	33.5631
Igf1	201.644	0.0966775	0.137381	12.8791	0.0245385	0.356208	163.215	166.674	280.976	171.436	173.381	218.243	166.179	159.364	249.176	219.202	244.662	207.216
Fabp4	34.1118	1.41145	0.264002	12.8185	0.0251402	0.364318	7.23615	17.3275	23.1227	23.232	15.0422	29.4923	32.8416	43.0029	74.8967	73.0675	36.5168	33.5631	4
Oas1c	5.40127	0.485845	0.592794	12.7519	0.0258185	0.373507	3.21607	1.65023	0	12.0166	8.70863	3.9323	3.28416	4.21597	2.88064	8.11861	10.955	5.83707
Gsdmd	20.626	-0.051829	0.295911	12.7006	0.026352	0.380576	14.4723	14.027	15.4151	24.8342	30.0844	23.5938	14.4503	9.27514	14.4032	23.4538	25.5617	37.9409
Atp5g1	90.1324	-0.0134707	0.158818	12.6849	0.026517	0.382306	101.306	109.741	112.11	91.3259	72.0441	57.0184	96.5544	96.9673	115.226	88.4026	76.6852	64.2077
Hck	29.862	-0.330502	0.254408	12.6762	0.0266092	0.382983	14.4723	21.453	36.4358	44.8619	38.793	47.1876	19.705	17.7071	21.6048	30.6703	30.4306	35.0224
Tpm2	5.68594	-1.8088	0.63552	12.6538	0.0268481	0.385765	11.2562	7.42605	6.30619	2.40331	3.95847	21.6277	5.9115	2.52958	0	0	2.43445	4.3778
Ybx1	206.377	0.129565	0.127515	12.6296	0.0271089	0.388852	216.28	245.885	208.104	199.475	155.172	159.258	225.294	248.742	244.855	229.125	198.408	145.927	4
Hlx	17.0658	-0.756806	0.383243	12.6253	0.027155	0.388854	14.4723	13.2019	24.5241	20.8287	25.3342	19.6615	12.4798	4.21597	5.76129	5.41241	41.3857	17.5112
Gch1	16.3778	-0.323369	0.332797	12.5942	0.0274938	0.393041	16.8844	18.1526	23.8234	25.6353	14.2505	7.8646	9.19566	16.0207	23.0452	27.062	7.30335	7.29633
Cd300ld5	15.4629	-0.82927	0.364591	12.574	0.0277153	0.395539	12.0603	23.1033	11.9117	8.01105	34.0428	31.4584	5.25466	10.1183	7.20161	11.7269	21.9101	8.7556
Atp6v0a1	79.7228	0.321335	0.176333	12.5684	0.0277774	0.395757	102.914	73.4354	81.9805	62.4862	54.6269	49.1538	100.495	118.047	95.0613	86.5985	55.9924	75.8819	3
Mcm3	11.2013	0.138598	0.41115	12.548	0.0280033	0.397637	19.2964	9.90141	14.7144	8.81215	5.54186	3.9323	14.4503	17.7071	20.1645	9.92275	1.21723	8.7556
Slc29a3	27.1533	0.325573	0.270688	12.5501	0.0279805	0.397637	12.8643	15.6772	20.3199	33.6464	35.6262	25.56	25.6165	14.3343	27.3661	27.9641	40.1684	46.6965
Cited2	26.1356	-0.126909	0.267158	12.5404	0.0280886	0.398181	22.5125	18.1526	26.6261	23.232	33.2511	35.3907	15.1072	13.4911	20.1645	23.4538	41.3857	40.8595	2
Spire1	7.96057	-0.331349	0.468952	12.4426	0.0292015	0.413265	16.0803	13.2019	7.70757	8.01105	5.54186	1.96615	15.1072	10.1183	4.32097	8.11861	2.43445	2.91853
Atp2a2	33.5899	-0.196639	0.245927	12.4173	0.0294959	0.416734	40.2008	36.3052	53.2523	29.6409	22.1674	33.4246	32.8416	38.7869	44.65	39.691	14.6067	17.5112	4
Cytip	4.03627	-0.756257	0.718317	12.406	0.0296285	0.417909	6.43213	0	2.10206	3.20442	4.75016	13.7631	1.9705	1.68639	0	0.902068	4.8689	8.7556
Rab9	21.5585	0.177886	0.294533	12.3872	0.0298504	0.420339	10.4522	14.8521	20.3199	16.8232	28.501	29.4923	17.7345	10.9615	14.4032	24.3558	32.8651	37.9409
Ckap2l	2.83042	-0.026954	0.812652	12.3621	0.0301499	0.423851	7.23615	5.77582	2.80275	0.801105	0.791694	0	5.9115	5.05916	2.88064	2.7062	0	0
Dis3	3.6522	-0.426462	0.737648	12.3474	0.0303258	0.425617	3.21607	14.027	0	7.20994	2.37508	0	1.9705	6.74555	1.44032	2.7062	1.21723	2.91853
Ckb	254.034	0.182779	0.127554	12.3209	0.0306457	0.429395	181.708	202.979	255.751	286.795	232.758	265.43	241.715	190.562	249.176	319.332	320.13	302.068
Ephx1	25.0958	-0.545179	0.295327	12.3149	0.0307188	0.429707	30.5526	23.9284	24.5241	19.2265	40.3764	33.4246	9.85249	16.8639	11.5226	17.1393	47.4718	26.2668
Psat1	6.58089	0.274189	0.52164	12.3088	0.0307933	0.43004	8.04017	8.25117	8.40825	5.60773	2.37508	1.96615	5.25466	14.3343	12.9629	8.11861	3.65168	0	4
Rnf144b	6.26341	0.819641	0.542868	12.2578	0.031421	0.437361	2.41205	2.47535	2.80275	5.60773	10.292	1.96615	2.62733	2.52958	4.32097	12.6289	15.8239	11.6741	1
Dbp	9.59383	-0.0521498	0.436885	12.2614	0.0313769	0.437361	4.02008	9.07629	4.20413	16.8232	11.8754	11.7969	6.56833	7.58875	1.44032	10.8248	20.6928	10.2149	2
Ubash3b	12.4254	0.0416303	0.375385	12.2044	0.0320924	0.445974	21.7085	9.90141	16.8165	12.8177	6.33355	5.89845	19.0482	16.8639	17.2839	11.7269	4.8689	5.83707	3
Ybx3	29.9251	-0.160962	0.268478	12.1608	0.0326498	0.452976	37.7888	41.2559	42.742	16.0221	20.584	31.4584	27.587	42.1597	37.4484	30.6703	10.955	20.4297
Bin1	47.6824	-0.0147742	0.209742	12.1302	0.0330467	0.457731	57.0852	69.3098	50.4495	49.6685	29.2927	31.4584	61.0855	47.2189	59.0532	48.7117	27.9962	40.8595	4
Snx5	132.427	0.307711	0.14335	12.1246	0.0331192	0.457987	114.17	95.7136	89.6881	102.541	163.881	151.394	143.846	128.166	123.868	139.821	166.76	169.275
Gm37086	12.3535	-0.189857	0.387099	12.0807	0.0336987	0.46524	3.21607	5.77582	16.8165	16.0221	22.9591	17.6954	7.22516	6.74555	17.2839	9.92275	15.8239	8.7556	2
Srgn	43.8677	-0.556258	0.24327	12.0761	0.0337595	0.46532	54.6731	75.0857	33.633	28.0387	63.3355	55.0522	20.3618	31.1982	33.1274	24.3558	53.5579	53.9929
Usp2	3.7672	0.179367	0.699625	12.0477	0.0341402	0.469802	8.84418	5.77582	2.10206	2.40331	1.58339	0	9.85249	6.74555	4.32097	0.902068	1.21723	1.45927	3
Eef1g	137.439	0.137982	0.142071	12.0219	0.0344894	0.473837	162.411	131.194	143.641	128.177	96.5866	123.867	178.002	173.698	155.555	139.821	108.333	107.986	4
Tapbpl	9.02651	-0.795389	0.472943	12.011	0.0346373	0.475097	4.8241	5.77582	4.20413	17.6243	20.584	15.7292	1.31367	3.37278	10.0823	6.31447	9.7378	8.7556
Lgals3	3475.32	0.354766	0.0934095	12.0065	0.0346994	0.475179	2472.35	2883.78	3612.75	3662.65	2876.22	2852.88	3627.03	3796.06	4208.62	4489.59	3823.31	3398.63
Hnrnpab	100.096	-0.144419	0.157371	11.9939	0.0348709	0.476757	117.386	136.144	111.409	88.9226	83.9195	92.4091	124.141	112.988	99.3822	93.8151	63.2957	77.3411	3
Rpl3	170.414	0.13655	0.133468	11.9744	0.0351409	0.478463	198.592	174.1	163.26	179.447	134.588	123.867	212.157	190.562	208.847	174.099	164.325	121.119	4
Hexa	283.686	0.299286	0.11387	11.9726	0.0351653	0.478463	229.145	218.656	220.016	240.331	305.594	316.55	293.604	289.216	272.221	282.347	368.819	367.735
Tent5c	11.9744	0.253467	0.387406	11.98	0.0350633	0.478463	12.8643	24.7535	7.00688	8.81215	6.33355	5.89845	17.7345	21.923	10.0823	5.41241	9.7378	13.1334
Fos	11.1201	-0.917092	0.431915	11.9593	0.0353493	0.479517	7.23615	16.5023	10.5103	8.01105	25.3342	15.7292	3.28416	8.43194	10.0823	1.80414	6.08613	20.4297	3
Rhob	90.853	0.108644	0.179618	11.9588	0.0353561	0.479517	110.15	122.117	88.9874	47.2652	78.3777	82.5783	82.1041	118.047	122.427	77.5778	87.6402	72.9633	3
Nfxl1	5.45344	-0.999288	0.642677	11.9445	0.0355568	0.481468	3.21607	0	7.00688	16.0221	10.292	7.8646	1.31367	2.52958	0	7.21654	8.52058	1.45927
Ccr5	12.2272	-1.21855	0.403284	11.9299	0.0357604	0.483451	12.0603	9.07629	7.70757	18.4254	23.7508	31.4584	4.59783	2.52958	7.20161	6.31447	13.3895	10.2149	1
Chmp4b	101.753	-0.174069	0.180265	11.9042	0.0361245	0.487594	61.9093	86.6373	100.899	179.447	106.087	123.867	84.7315	77.5739	79.2177	99.2275	119.288	102.149	2
Ezr	18.1335	0.0235317	0.326571	11.8994	0.0361919	0.487726	22.5125	38.7805	16.8165	11.2155	15.0422	5.89845	24.9597	25.2958	10.0823	18.0414	15.8239	13.1334
Nhp2	28.4131	0.0284938	0.256439	11.8617	0.0367329	0.49423	31.3567	42.9061	35.7351	19.2265	18.209	21.6277	32.8416	33.7278	41.7693	27.062	14.6067	21.889
Ncapd2	4.0678	0.366753	0.693105	11.8506	0.0368929	0.494809	5.62812	5.77582	6.30619	4.00552	0	0	9.19566	9.27514	1.44032	4.51034	1.21723	1.45927
Slc39a8	9.4407	-0.0368989	0.431845	11.852	0.0368726	0.494809	17.6884	15.6772	7.00688	8.01105	5.54186	3.9323	15.1072	13.4911	7.20161	7.21654	10.955	1.45927
Rab32	36.5797	-0.134476	0.256207	11.8459	0.0369615	0.494945	56.2812	46.2066	30.1296	29.6409	24.5425	41.2892	44.6646	43.8461	44.65	45.1034	12.1723	20.4297
Rrm1	11.8983	0.203284	0.398841	11.8202	0.0373367	0.499179	20.1004	14.027	8.40825	10.4144	10.292	1.96615	18.3913	23.6094	15.8435	9.02068	4.8689	5.83707
Ro60	4.15572	0.0496888	0.656985	11.8135	0.0374341	0.499692	2.41205	1.65023	11.9117	3.20442	6.33355	0	3.941	0.843194	7.20161	3.60827	7.30335	1.45927
Ube2s	44.9087	-0.162521	0.215492	11.7756	0.0379952	0.506383	52.2611	60.2335	42.0413	45.663	38.0013	43.2553	59.115	70.8283	33.1274	34.2786	27.9962	32.1039
Aoah	7.01184	-0.276677	0.504645	11.7667	0.0381289	0.507366	5.62812	4.12559	4.90482	6.40884	7.12524	13.7631	2.62733	2.52958	5.76129	4.51034	4.8689	21.889
Fermt3	79.8094	-0.224611	0.173562	11.7359	0.0385909	0.512707	88.4418	66.8345	65.164	81.7127	111.629	98.3075	52.5466	55.6508	66.2548	75.7737	103.464	91.9338
Clta	162.666	-0.064192	0.136525	11.7219	0.0388032	0.51472	199.396	207.93	138.036	179.447	119.546	157.292	180.629	178.757	126.748	179.511	146.067	138.63
Slamf9	9.8137	-1.75073	0.484008	11.7101	0.0389833	0.516052	9.6482	10.7265	6.30619	27.2376	28.501	7.8646	4.59783	0.843194	1.44032	7.21654	6.08613	7.29633	1
Yars	9.8421	0.325813	0.417155	11.7073	0.0390256	0.516052	9.6482	9.90141	16.8165	8.01105	6.33355	1.96615	13.7935	16.8639	15.8435	9.92275	6.08613	2.91853
Nmi	12.4623	-0.40141	0.404996	11.6997	0.0391433	0.516801	6.43213	12.3768	9.10894	26.4365	17.4173	9.83075	3.28416	3.37278	12.9629	13.531	15.8239	18.9705
Sun1	6.24919	0.127401	0.523144	11.6746	0.0395289	0.521079	8.04017	7.42605	7.00688	5.60773	7.12524	0	8.53883	7.58875	10.0823	9.92275	3.65168	0
Aida	29.5743	-0.415796	0.25467	11.6627	0.0397136	0.5227	21.7085	28.054	28.7282	57.6795	41.9598	25.56	19.705	23.6094	14.4032	33.3765	35.2995	24.8075
Tmem171	20.1833	-0.426696	0.308839	11.6366	0.0401215	0.527249	10.4522	22.2782	33.633	43.2597	20.584	11.7969	13.1367	15.1775	14.4032	27.062	15.8239	14.5927
Rcsd1	7.95947	-0.0321193	0.463691	11.6258	0.0402908	0.528653	6.43213	0.825117	8.40825	9.61326	11.8754	11.7969	5.25466	2.52958	7.20161	9.92275	8.52058	13.1334
Ensa	46.8004	-0.0988047	0.21174	11.5866	0.0409124	0.535149	39.3968	37.9554	44.844	42.4585	72.8358	49.1538	30.2143	43.0029	50.4113	27.9641	62.0785	61.2892	1
Ccpg1	11.481	-0.0908954	0.386918	11.5904	0.0408516	0.535149	8.04017	9.90141	4.90482	12.0166	22.9591	13.7631	9.85249	6.74555	4.32097	15.3352	18.2584	11.6741
Tmem229b	10.7181	-0.310669	0.413058	11.5772	0.041064	0.536303	7.23615	4.9507	14.0138	24.0331	19.0007	3.9323	9.19566	5.05916	5.76129	13.531	14.6067	7.29633	2
Slc25a22	9.83888	-0.0226389	0.440351	11.5621	0.0413064	0.537846	3.21607	2.47535	17.5172	19.2265	6.33355	15.7292	5.25466	6.74555	8.64193	14.4331	9.7378	8.7556
Spc25	7.89333	0.459073	0.489463	11.5619	0.0413092	0.537846	12.0603	9.07629	1.40138	8.01105	5.54186	3.9323	13.7935	16.8639	7.20161	11.7269	3.65168	1.45927
Casp4	15.47	-0.95486	0.368483	11.5488	0.041521	0.539773	8.84418	14.8521	15.4151	34.4475	23.7508	23.5938	7.22516	6.74555	2.88064	9.92275	21.9101	16.0519	2
Apobec1	77.2116	0.129683	0.173484	11.5351	0.0417442	0.541013	73.9695	61.8838	58.8578	79.3094	89.4614	72.7476	80.7905	64.0828	50.4113	75.7737	122.94	96.3116	2
Pnpla2	36.2252	-0.210486	0.239565	11.5358	0.0417326	0.541013	32.1607	32.1796	36.4358	48.0663	58.5853	21.6277	19.0482	27.8254	30.2468	33.3765	57.2096	37.9409	2
Gpnmb	2067.12	0.723508	0.0981683	11.5249	0.0419103	0.542335	1530.85	1553.7	1769.24	1738.4	1441.67	1299.63	2499.91	2427.56	2785.58	2958.78	2881.17	1918.94
Rnf31	9.97629	0.260311	0.418279	11.5089	0.0421726	0.544895	5.62812	4.12559	12.6124	11.2155	10.292	7.8646	3.941	3.37278	15.8435	11.7269	17.0412	16.0519	2
Snord3b1	12.7762	-0.0758539	0.379295	11.4957	0.0423912	0.546053	21.7085	13.2019	17.5172	11.2155	3.95847	11.7969	15.1072	20.2367	17.2839	10.8248	6.08613	4.3778	4
Cadm1	39.2321	0.541273	0.221904	11.4992	0.0423332	0.546053	44.2209	22.2782	44.1433	37.6519	24.5425	19.6615	55.174	41.3165	61.9338	50.5158	32.8651	36.4817
Lrrc59	50.7224	0.124301	0.209977	11.4638	0.0429214	0.551204	62.7133	49.507	61.6605	37.6519	37.2096	41.2892	55.8308	69.9851	73.4564	56.8303	30.4306	32.1039
Psip1	3.41147	-1.29764	0.747047	11.4662	0.042882	0.551204	8.04017	7.42605	1.40138	7.20994	0.791694	3.9323	4.59783	3.37278	0	2.7062	0	1.45927
Ndufb6	52.3069	0.10115	0.202928	11.4549	0.0430699	0.552274	46.633	70.135	53.2523	56.8784	30.8761	45.2215	64.3696	55.6508	70.5758	61.3406	30.4306	42.3187
Nme2	201.744	0.177477	0.123521	11.4317	0.0434613	0.55645	193.768	198.853	217.914	221.105	159.922	143.529	216.755	225.133	246.295	248.971	169.194	179.49
Slc11a1	69.2662	0.48178	0.181352	11.4091	0.0438455	0.56052	45.0249	47.0317	81.2798	48.8674	50.6684	74.7137	60.4286	60.71	87.8596	72.1654	97.378	105.067
Dbi	71.9441	0.0167925	0.18618	11.3876	0.0442134	0.562228	85.2258	91.588	78.477	60.884	55.4186	57.0184	83.4178	78.4171	89.3	91.1089	55.9924	36.4817
Pgap1	11.8068	0.473195	0.415147	11.3867	0.0442288	0.562228	5.62812	9.90141	2.80275	10.4144	11.0837	17.6954	5.25466	5.05916	12.9629	11.7269	24.3445	24.8075
Rps13	230.519	0.140036	0.132687	11.3918	0.0441419	0.562228	269.346	292.917	201.097	185.055	212.966	161.224	271.272	255.488	247.735	262.502	230.056	176.571
Trim12c	11.7478	-0.239042	0.400487	11.3858	0.0442448	0.562228	5.62812	6.60094	13.3131	16.8232	9.50033	25.56	5.9115	7.58875	2.88064	18.9434	12.1723	16.0519
Cd300ld3	17.734	-0.173199	0.315307	11.3655	0.0445963	0.565844	16.0803	28.054	14.0138	9.61326	28.501	17.6954	19.705	21.923	11.5226	9.92275	25.5617	10.2149
Nfkbie	9.27492	-0.768934	0.462895	11.3561	0.0447585	0.567053	3.21607	31.3545	16.1158	8.01105	8.70863	5.89845	3.28416	7.58875	8.64193	6.31447	4.8689	7.29633
Trim21	9.99094	-0.0495658	0.427301	11.3308	0.0452013	0.571806	1.60803	6.60094	9.80963	16.0221	19.0007	9.83075	5.9115	4.21597	8.64193	11.7269	13.3895	13.1334
Akap8l	10.0811	0.00856354	0.416699	11.3163	0.0454575	0.57419	5.62812	6.60094	6.30619	5.60773	18.209	19.6615	11.1662	5.05916	5.76129	6.31447	14.6067	16.0519
Flrt2	7.42713	0.774241	0.505667	11.3009	0.0457296	0.576766	4.02008	3.30047	8.40825	14.4199	3.16678	0	5.9115	8.43194	15.8435	14.4331	2.43445	8.7556
Serpinb6a	326.145	0.0972093	0.115729	11.2642	0.0463858	0.584172	331.255	338.298	244.54	271.574	384.763	318.516	327.103	310.295	275.102	313.92	410.205	388.165
Ccdc97	11.5695	0.15119	0.392548	11.2567	0.0465214	0.585008	10.4522	4.9507	5.6055	16.8232	16.6256	9.83075	5.9115	8.43194	5.76129	16.2372	20.6928	17.5112
Ccl4	48.5518	-0.522536	0.231392	11.2482	0.0466747	0.586066	23.3165	71.7852	70.7695	56.8784	73.6275	49.1538	24.9597	35.4142	28.8064	49.6137	41.3857	56.9114
H3f3a	198.281	-0.0229684	0.133965	11.2396	0.0468313	0.587161	208.24	221.957	177.975	164.226	246.217	173.021	172.747	186.346	164.197	174.099	286.048	204.297
Cdt1	16.4045	0.544945	0.349489	11.2348	0.0469191	0.587391	26.5326	8.25117	19.6193	11.2155	10.292	5.89845	30.2143	27.8254	15.8435	18.0414	15.8239	7.29633
Gas5	37.8954	0.00364684	0.221825	11.2275	0.0470512	0.587732	31.3567	32.1796	27.3268	32.0442	49.085	55.0522	28.9007	37.1005	30.2468	27.062	54.7751	49.6151
Insl6	9.21399	0.438534	0.445381	11.2243	0.0471096	0.587732	3.21607	2.47535	6.30619	12.8177	19.0007	5.89845	8.53883	5.05916	7.20161	13.531	13.3895	13.1334
Kif21b	5.71061	0.590788	0.580408	11.2218	0.0471547	0.587732	12.0603	2.47535	1.40138	8.81215	3.95847	0	12.4798	7.58875	1.44032	5.41241	8.52058	4.3778
Mcm6	25.0936	-0.256938	0.284935	11.2057	0.0474508	0.589984	24.9245	25.5786	48.3475	29.6409	12.6671	25.56	24.3028	32.8846	23.0452	28.8662	12.1723	13.1334
Tspan31	40.4689	-0.229773	0.22313	11.2044	0.0474747	0.589984	33.7687	34.6549	40.6399	50.4696	50.6684	47.1876	24.9597	19.3935	37.4484	46.9075	57.2096	42.3187
Csk	43.1655	-0.349374	0.229663	11.1868	0.0478	0.593154	28.9446	30.5293	54.6537	62.4862	54.6269	58.9845	33.4985	25.2958	23.0452	37.8868	51.1235	56.9114
Ppp1r14b	54.713	-0.00630603	0.209764	11.1718	0.0480786	0.594909	49.045	80.8615	64.4633	52.8729	30.0844	55.0522	65.0265	56.494	70.5758	62.2427	37.734	32.1039	4
Bdh2	3.15906	0.576354	0.780074	11.1716	0.048082	0.594909	2.41205	2.47535	4.20413	3.20442	0	1.96615	6.56833	3.37278	2.88064	10.8248	0	0
P2ry6	68.5102	-0.418914	0.182846	11.1583	0.0483299	0.597103	94.07	61.8838	60.9598	69.6961	82.3362	96.3414	53.2035	48.0621	40.329	50.5158	74.2508	90.4745
Cept1	33.1684	-0.198327	0.237642	11.1285	0.0488909	0.603154	21.7085	24.7535	32.2316	43.2597	47.5016	43.2553	20.3618	27.8254	21.6048	31.5724	40.1684	43.778	2
Idh3a	11.8576	-0.045013	0.386242	11.0848	0.0497236	0.612534	14.4723	17.3275	16.8165	6.40884	7.91694	7.8646	13.7935	21.0799	15.8435	8.11861	2.43445	10.2149
Nectin4	7.80652	-0.244292	0.493489	11.0511	0.0503754	0.619661	4.02008	1.65023	5.6055	11.2155	15.8339	13.7631	7.882	3.37278	2.88064	3.60827	12.1723	11.6741	2
Dmpk	3.62807	-1.17814	0.727865	11.0465	0.0504653	0.619866	7.23615	7.42605	7.70757	6.40884	0	1.96615	4.59783	1.68639	1.44032	3.60827	0	1.45927
Tmem50a	127.48	0.0390952	0.145731	11.0425	0.0505432	0.619923	114.17	109.741	106.505	149.807	150.422	119.935	97.8681	126.479	106.584	141.625	182.584	124.038
Hnrnpa1	56.1868	-0.129112	0.206306	11.0366	0.0506591	0.620446	73.9695	71.7852	57.4564	54.4751	38.0013	57.0184	72.9085	65.7691	57.6129	59.5365	43.8201	21.889	4
Sptssa	47.2793	0.350155	0.207565	11.0313	0.0507624	0.620812	50.6531	53.6326	44.844	42.4585	28.501	29.4923	57.1445	74.2011	44.65	65.851	43.8201	32.1039
Unc119	24.2523	-0.291232	0.274686	11.009	0.0512019	0.625284	33.7687	37.9554	25.2248	28.8398	13.4588	21.6277	28.2438	29.5118	25.9258	21.6496	14.6067	10.2149
Slamf7	6.27417	0.608599	0.556221	10.994	0.0514983	0.627997	0.804017	0.825117	3.50344	8.01105	11.0837	7.8646	4.59783	4.21597	2.88064	10.8248	6.08613	14.5927	2
Fgd3	9.92785	-0.409253	0.423956	10.9689	0.0520006	0.63321	16.8844	8.25117	4.20413	14.4199	12.6671	9.83075	12.4798	8.43194	0	8.11861	12.1723	11.6741
Lyn	57.388	-0.407934	0.195659	10.9248	0.0528924	0.643144	56.2812	47.0317	67.266	68.895	82.3362	66.8491	36.1258	35.4142	34.5677	62.2427	71.8163	59.8299
Afg3l2	18.0468	0.11986	0.329607	10.9054	0.0532891	0.647039	24.1205	25.5786	10.5103	24.8342	8.70863	9.83075	17.0777	33.7278	21.6048	16.2372	9.7378	14.5927
Lmna	94.6823	0.0213189	0.161852	10.8946	0.0535098	0.648074	117.386	112.216	113.511	64.8895	72.8358	86.5106	111.005	112.988	97.9419	90.2068	70.5991	86.0967
Lyz2	4407.95	0.349748	0.089366	10.8938	0.0535276	0.648074	4238.78	4304.64	3650.58	3524.06	4172.23	3346.39	5121.33	5233.71	4907.18	4351.58	5859.72	4185.18
G6pdx	52.6044	0.0270437	0.197575	10.8724	0.053969	0.651703	45.0249	33.8298	67.9667	43.2597	57.002	66.8491	42.0373	39.6301	57.6129	44.2013	75.468	58.3707
Picalm	51.7118	-0.525332	0.212781	10.8718	0.0539813	0.651703	70.7535	61.8838	42.0413	43.2597	67.294	76.6799	32.1848	48.9053	41.7693	21.6496	57.2096	56.9114
Ahsa1	104.583	0.0231043	0.170146	10.8519	0.054396	0.655774	73.9695	85.8122	142.94	150.608	87.878	88.4768	99.8386	115.518	105.144	127.192	75.468	102.149
Slc9a9	16.5572	0.946729	0.358869	10.8033	0.0554218	0.662806	16.8844	19.8028	5.6055	7.20994	12.6671	3.9323	36.1258	26.139	18.7242	9.02068	13.3895	29.1853	1
Eaf1	29.5068	-0.021059	0.248115	10.8086	0.0553107	0.662806	43.4169	34.6549	30.8303	26.4365	20.584	21.6277	38.7531	41.3165	31.6871	27.062	15.8239	21.889	3
1700017B05Rik	16.5817	-0.0213082	0.333603	10.802	0.0554492	0.662806	24.9245	19.8028	11.211	10.4144	16.6256	15.7292	30.2143	25.2958	14.4032	9.92275	7.30335	13.1334
Cyld	11.5042	-0.199236	0.409498	10.8192	0.055085	0.662806	7.23615	7.42605	11.9117	19.2265	14.2505	9.83075	7.22516	2.52958	15.8435	21.6496	4.8689	16.0519
Epb41l1	33.0072	-0.232301	0.244959	10.8048	0.0553907	0.662806	29.7486	23.1033	30.1296	39.2541	38.0013	51.1199	19.705	27.8254	15.8435	31.5724	40.1684	49.6151
Syvn1	19.2766	-0.250585	0.319755	10.8067	0.0553497	0.662806	16.0803	13.2019	30.8303	24.0331	19.0007	19.6615	6.56833	16.8639	34.5677	19.8455	21.9101	8.7556
mt-Co2	2379.17	0.0269799	0.126134	10.7866	0.0557798	0.665817	2850.24	3177.53	2770.52	2142.15	1567.55	1838.35	2459.84	2347.45	2484.56	2499.63	2167.88	2244.35	4
Il4ra	32.1734	-0.343474	0.246796	10.7435	0.0567087	0.675952	44.2209	26.4037	18.9186	34.4475	44.3349	49.1538	32.1848	25.2958	18.7242	22.5517	45.0373	24.8075
Samsn1	3.60223	-0.313379	0.712642	10.7169	0.0572914	0.681175	0.804017	12.3768	3.50344	4.80663	1.58339	1.96615	1.9705	7.58875	1.44032	4.51034	1.21723	1.45927
Tmem219	45.6751	0.0845195	0.212569	10.7161	0.0573079	0.681175	30.5526	31.3545	43.4427	64.8895	51.4601	43.2553	30.2143	38.7869	43.2097	47.8096	63.2957	59.8299
Cdk14	10.9965	-0.239935	0.40781	10.7107	0.0574266	0.681629	9.6482	11.5516	16.1158	15.221	6.33355	9.83075	7.22516	10.9615	10.0823	25.2579	2.43445	7.29633
Atp5mpl	86.2388	0.0818804	0.161084	10.6891	0.0579045	0.686338	86.0298	87.4624	103.001	89.7237	84.7112	51.1199	91.2998	86.849	113.785	101.934	79.1197	59.8299
Ddx5	162.724	-0.0661498	0.146783	10.6734	0.0582537	0.689511	174.472	189.777	119.117	192.265	163.881	151.394	156.326	195.621	102.263	132.604	191.104	183.868
Arf4	70.1014	-0.093907	0.174279	10.6665	0.0584078	0.69037	52.2611	58.5833	79.8784	82.5138	82.3362	76.6799	43.351	58.1804	84.979	79.382	65.7302	77.3411
Mier3	4.5575	-0.120635	0.637107	10.6604	0.0585457	0.691035	3.21607	4.9507	0	6.40884	3.95847	9.83075	0.656833	4.21597	1.44032	5.41241	7.30335	7.29633
Tep1	28.8757	0.0555781	0.254241	10.6477	0.0588295	0.693417	21.7085	16.5023	26.6261	40.8563	38.793	25.56	20.3618	20.2367	36.0081	29.7682	43.8201	26.2668
Mvp	47.6556	-0.268526	0.209687	10.6017	0.0598757	0.704768	28.9446	42.081	46.9461	64.8895	53.0435	80.6122	34.1553	34.571	43.2097	38.7889	46.2546	58.3707
Stab1	62.0354	0.11344	0.184989	10.5915	0.0601096	0.705558	82.0097	64.3591	56.7557	56.8784	53.0435	43.2553	84.7315	78.4171	76.3371	55.9282	47.4718	45.2373	3
Mxd1	6.69762	-1.20338	0.533966	10.5917	0.0601035	0.705558	4.8241	5.77582	5.6055	16.0221	14.2505	7.8646	1.31367	2.52958	1.44032	5.41241	10.955	4.3778
Dleu2	4.50992	0.198435	0.644269	10.5864	0.0602263	0.705949	1.60803	0.825117	2.80275	5.60773	7.91694	5.89845	3.28416	0.843194	5.76129	1.80414	13.3895	4.3778
Nbeal2	9.57693	-0.516753	0.432587	10.5599	0.0608383	0.712136	6.43213	6.60094	8.40825	16.0221	16.6256	11.7969	5.25466	3.37278	5.76129	8.11861	20.6928	5.83707
Ptpn1	47.6635	0.144882	0.205133	10.5516	0.0610329	0.713428	38.5928	35.48	36.4358	32.8453	63.3355	68.8153	44.0078	39.6301	40.329	49.6137	57.2096	65.667
Slc25a5	113.576	-0.0728682	0.157698	10.5424	0.0612466	0.714938	123.015	136.144	117.015	95.3315	110.837	112.071	128.739	150.932	139.711	83.8923	86.423	78.8004	3
Hmmr	2.91079	0.409105	0.791935	10.5206	0.0617597	0.717957	3.21607	7.42605	2.10206	3.20442	0	0	5.25466	4.21597	2.88064	5.41241	1.21723	0
Hnrnph1	28.8606	-0.0107452	0.250611	10.5238	0.0616843	0.717957	41.8089	25.5786	41.3406	26.4365	19.0007	19.6615	32.1848	27.8254	44.65	25.2579	20.6928	21.889
Lamp1	575.448	0.295445	0.103526	10.5246	0.0616646	0.717957	481.606	435.662	458.25	581.602	601.687	540.691	539.917	564.94	610.697	652.195	781.459	656.67
Mill2	4.94707	0.0764729	0.619945	10.5079	0.062058	0.720435	1.60803	0.825117	1.40138	12.0166	4.75016	11.7969	1.9705	2.52958	5.76129	7.21654	3.65168	5.83707
Gins2	9.13555	-0.397507	0.459848	10.4672	0.0630297	0.730713	14.4723	11.5516	11.9117	13.6188	9.50033	0	10.5093	14.3343	12.9629	5.41241	2.43445	2.91853
Man1a	28.0788	-0.868388	0.277461	10.4633	0.063122	0.730781	34.5727	52.8075	14.7144	31.2431	34.8345	51.1199	26.9302	20.2367	14.4032	10.8248	21.9101	23.3483
Cct2	56.3887	-0.0938833	0.189862	10.4562	0.063293	0.731194	61.1053	84.9871	60.9598	43.2597	51.4601	47.1876	63.056	73.3579	54.7322	42.3972	40.1684	53.9929	4
Folr2	9.90175	0.283149	0.439761	10.4547	0.0633304	0.731194	11.2562	14.8521	9.80963	12.0166	2.37508	3.9323	14.4503	8.43194	17.2839	14.4331	8.52058	1.45927
Clec12a	93.2946	-0.0584665	0.165623	10.4122	0.0643624	0.738075	59.4972	82.5117	86.1846	107.348	121.921	117.969	82.761	66.6123	87.8596	92.0109	108.333	106.526	2
Pgs1	14.4711	-0.301395	0.348977	10.4167	0.0642523	0.738075	20.9044	24.7535	13.3131	10.4144	11.8754	13.7631	19.0482	23.6094	11.5226	10.8248	4.8689	8.7556	3
Gsr	30.4842	-0.162877	0.253439	10.4199	0.0641759	0.738075	28.9446	38.7805	53.953	24.0331	17.4173	31.4584	18.3913	35.4142	34.5677	26.16	23.1273	33.5631	4
Rps6	271.094	0.117852	0.128782	10.4154	0.0642859	0.738075	274.17	316.02	312.507	212.293	231.175	218.243	335.642	309.452	286.624	286.858	277.527	192.623	4
Pgm5	5.07114	1.28726	0.612241	10.4194	0.0641865	0.738075	0.804017	1.65023	9.10894	4.00552	3.16678	0	2.62733	3.37278	11.5226	9.02068	9.7378	5.83707
Pou2f2	4.87409	-0.00779301	0.624004	10.385	0.0650333	0.744759	2.41205	0.825117	2.80275	3.20442	8.70863	11.7969	0.656833	4.21597	5.76129	1.80414	6.08613	10.2149
Tomm20	79.5664	0.143646	0.170739	10.3715	0.0653672	0.745643	94.07	103.14	75.6743	54.4751	59.377	68.8153	93.2703	97.8105	95.0613	77.5778	59.644	75.8819	3
Bambi	3.22461	0.27043	0.739657	10.3722	0.065351	0.745643	5.62812	2.47535	4.20413	0.801105	3.95847	0	7.22516	6.74555	4.32097	0.902068	2.43445	0	4
Tcirg1	140.885	0.0558387	0.139661	10.3712	0.0653748	0.745643	106.13	115.516	152.049	169.834	149.63	133.698	114.289	113.831	144.032	156.058	169.194	166.356
Cyb5a	70.7331	-0.195201	0.194299	10.358	0.0657051	0.746427	67.5374	93.2382	105.103	60.0828	58.5853	66.8491	59.115	49.7485	108.024	62.2427	73.0335	45.2373
Nav2	11.2134	0.5629	0.41591	10.3553	0.0657717	0.746427	8.04017	12.3768	15.4151	4.80663	2.37508	13.7631	19.0482	14.3343	20.1645	13.531	4.8689	5.83707
Pla2g15	56.3235	0.179498	0.199521	10.3589	0.0656811	0.746427	54.6731	39.6056	46.2454	35.2486	72.0441	68.8153	49.2625	45.5325	66.2548	50.5158	57.2096	90.4745
Ppp1r9b	26.7627	0.0647851	0.259917	10.3508	0.0658845	0.746427	25.7285	16.5023	23.1227	17.6243	27.7093	49.1538	26.2733	19.3935	21.6048	26.16	25.5617	42.3187
Ska2	4.58536	0.553757	0.621852	10.3541	0.0658018	0.746427	6.43213	4.9507	2.80275	4.80663	2.37508	0	8.53883	10.1183	8.64193	2.7062	3.65168	0
Cers6	14.5074	0.0472953	0.354939	10.3315	0.0663689	0.750909	9.6482	5.77582	24.5241	22.4309	15.8339	7.8646	8.53883	8.43194	15.8435	18.9434	15.8239	20.4297
Eif4e	30.6686	0.0717402	0.258083	10.3193	0.0666763	0.752375	37.7888	45.3814	40.6399	20.8287	14.2505	23.5938	40.0668	33.7278	28.8064	34.2786	19.4756	29.1853
Hint1	150.689	0.0871399	0.140062	10.3224	0.0665991	0.752375	127.035	173.275	173.771	151.409	123.504	127.8	170.12	173.698	195.884	156.96	118.071	116.741
Plk1	3.73407	0.103585	0.677901	10.3121	0.0668611	0.753456	7.23615	3.30047	6.30619	3.20442	1.58339	0	9.19566	5.05916	2.88064	3.60827	2.43445	0
Aars	36.1383	0.148937	0.225019	10.3057	0.0670218	0.754263	31.3567	49.507	33.633	40.0552	25.3342	25.56	34.8121	55.6508	43.2097	41.4951	26.779	26.2668
C130026I21Rik	2.85926	-0.638744	0.799968	10.2804	0.0676694	0.760539	0.804017	4.12559	0	4.80663	5.54186	5.89845	1.31367	0.843194	0	2.7062	2.43445	5.83707
Eif2ak2	10.4853	-0.539174	0.411358	10.2698	0.0679415	0.761118	7.23615	4.9507	15.4151	15.221	15.8339	15.7292	6.56833	2.52958	5.76129	14.4331	13.3895	8.7556
Inpp5f	4.72264	0.890381	0.621166	10.2662	0.0680348	0.761118	1.60803	0.825117	5.6055	0.801105	6.33355	5.89845	3.941	1.68639	11.5226	3.60827	6.08613	8.7556
Mthfs	53.3401	0.285972	0.192254	10.2609	0.0681706	0.761118	46.633	45.3814	39.2385	41.6574	76.0026	39.323	54.5171	53.1212	48.971	51.4179	83.9886	59.8299
Nlrp3	5.12939	-1.95012	0.666654	10.2718	0.0678897	0.761118	5.62812	21.453	3.50344	11.2155	3.16678	3.9323	1.31367	3.37278	1.44032	3.60827	0	2.91853
Pcgf5	5.67665	-0.205675	0.558122	10.2636	0.0681019	0.761118	2.41205	2.47535	4.90482	10.4144	8.70863	5.89845	1.31367	2.52958	2.88064	5.41241	10.955	10.2149
Plxnb2	65.3461	0.0200912	0.190025	10.2523	0.0683935	0.762601	63.5173	39.6056	60.2592	72.0994	71.2524	80.6122	55.8308	43.8461	80.658	50.5158	90.0747	75.8819
Sestd1	10.3154	-0.118679	0.405788	10.2451	0.0685817	0.763693	3.21607	12.3768	7.00688	12.0166	14.2505	15.7292	4.59783	7.58875	5.76129	10.8248	15.8239	14.5927
Bbc3	11.3589	0.20084	0.390013	10.2348	0.0688487	0.765048	6.43213	5.77582	13.3131	15.221	18.209	3.9323	5.9115	6.74555	15.8435	13.531	18.2584	13.1334
Cdk2ap2	15.7713	-0.302707	0.33854	10.2335	0.0688841	0.765048	8.84418	12.3768	28.0275	22.4309	19.7923	13.7631	9.19566	9.27514	12.9629	24.3558	19.4756	8.7556
Cox7a2	128.903	0.0333397	0.14524	10.227	0.0690542	0.765932	139.095	165.023	128.927	135.387	115.587	80.6122	138.592	145.029	148.353	140.723	105.899	103.608
Gbp9	4.96013	-0.548725	0.647535	10.2177	0.0692972	0.767621	1.60803	1.65023	6.30619	16.0221	7.91694	1.96615	0.656833	2.52958	1.44032	3.60827	8.52058	7.29633	2
Fus	27.9164	-0.0320336	0.267211	10.2051	0.0696272	0.770268	37.7888	29.7042	22.422	34.4475	15.8339	29.4923	41.3805	38.7869	28.8064	26.16	17.0412	13.1334
Flna	67.0761	-0.148122	0.186159	10.2007	0.0697439	0.770551	77.9896	66.8345	79.8784	90.5248	50.6684	53.0861	75.5358	54.8076	84.979	64.0468	36.5168	70.0448
Rab8b	95.0723	0.0173741	0.164431	10.1809	0.0702699	0.773334	86.0298	76.7359	90.3887	93.7292	103.712	110.104	85.3883	69.1419	66.2548	101.934	136.329	121.119
Tbrg1	30.1248	0.0748449	0.245534	10.1875	0.0700922	0.773334	21.7085	21.453	28.7282	34.4475	42.7515	25.56	21.0187	22.7662	36.0081	27.9641	49.9062	29.1853
Wdr89	99.0944	-0.0391017	0.161417	10.1829	0.0702164	0.773334	90.0499	92.4131	117.015	120.166	72.8358	110.104	89.9861	77.5739	138.271	118.171	85.2058	77.3411
Ap1b1	43.3774	0.0490858	0.212306	10.1691	0.0705821	0.775761	38.5928	28.8791	31.531	39.2541	58.5853	60.9507	36.1258	42.1597	31.6871	40.5931	52.3407	59.8299
Ier5	47.5896	-0.340869	0.217307	10.1378	0.0714248	0.778814	41.0049	54.4577	35.7351	67.2928	65.7106	51.1199	34.8121	32.8846	31.6871	35.1806	73.0335	48.1558	1
Aimp1	17.3019	-0.0671125	0.320661	10.1356	0.0714823	0.778814	16.8844	27.2289	22.422	17.6243	19.0007	3.9323	20.3618	23.6094	12.9629	18.0414	18.2584	7.29633
Clec5a	14.5768	-0.830942	0.385025	10.1384	0.0714069	0.778814	17.6884	20.6279	29.4289	12.0166	13.4588	15.7292	7.22516	20.2367	18.7242	14.4331	2.43445	2.91853
Hal	11.8186	2.19015	0.450782	10.1439	0.071258	0.778814	3.21607	7.42605	9.80963	1.60221	1.58339	3.9323	27.587	22.7662	27.3661	18.0414	9.7378	8.7556
Hmgb3	3.28409	0.0641295	0.736464	10.1467	0.0711849	0.778814	8.04017	4.9507	2.80275	1.60221	1.58339	0	7.22516	6.74555	2.88064	0.902068	1.21723	1.45927
Il2rg	26.9594	-0.7437	0.279075	10.1373	0.0714359	0.778814	17.6884	28.054	29.4289	36.8508	58.5853	31.4584	15.764	10.9615	17.2839	20.7476	23.1273	33.5631
Rnf19b	31.7696	-0.515982	0.281406	10.1348	0.071504	0.778814	22.5125	54.4577	21.0206	40.0552	35.6262	49.1538	14.4503	25.2958	24.4855	21.6496	53.5579	18.9705
Jdp2	3.79906	-1.15241	0.715224	10.1202	0.0719005	0.781121	6.43213	9.90141	2.10206	4.00552	5.54186	1.96615	3.28416	8.43194	0	2.7062	1.21723	0
Msrb1	99.7809	0.476618	0.157979	10.1214	0.0718673	0.781121	63.5173	82.5117	102.3	98.5359	95.0033	58.9845	103.78	91.9082	129.629	143.429	131.46	96.3116
Irf8	41.6586	0.0994707	0.212256	10.0883	0.0727712	0.789568	36.9848	31.3545	34.3337	29.6409	57.7936	53.0861	38.0963	34.571	40.329	35.1806	63.2957	45.2373
Gm7336	25.0016	-0.0563712	0.277418	10.0731	0.0731914	0.792307	34.5727	15.6772	37.8371	30.442	15.0422	21.6277	26.2733	24.4526	31.6871	32.4744	18.2584	11.6741
Natd1	8.70786	-0.0223514	0.438081	10.0724	0.0732109	0.792307	6.43213	6.60094	4.90482	6.40884	15.0422	11.7969	5.25466	7.58875	4.32097	4.51034	17.0412	14.5927
Erh	38.8952	-0.0181972	0.219876	10.0541	0.073717	0.796764	53.8691	47.0317	42.742	24.0331	29.2927	39.323	52.5466	41.3165	38.8887	26.16	36.5168	35.0224
Banf1	39.0777	-0.0474767	0.220593	10.0383	0.0741572	0.8005	53.0651	43.7312	54.6537	30.442	28.501	29.4923	44.0078	43.8461	48.971	36.9848	30.4306	24.8075
H1f2	32.4501	0.0562023	0.251022	10.0299	0.0743928	0.802021	28.9446	36.3052	18.9186	29.6409	28.501	45.2215	32.8416	28.6686	23.0452	18.0414	43.8201	55.4521
Sh3bp2	43.3486	-0.0538156	0.212878	10.0253	0.0745208	0.802378	45.829	59.4084	43.4427	40.8563	33.2511	41.2892	55.174	65.7691	37.4484	35.1806	30.4306	32.1039
Ddx24	29.8542	-0.210403	0.25215	10.0183	0.0747194	0.803494	22.5125	23.1033	25.9255	49.6685	29.2927	41.2892	22.9892	16.0207	27.3661	29.7682	27.9962	42.3187
Fxyd5	228.459	-0.318746	0.12071	10.012	0.0748946	0.804357	254.069	227.732	205.302	243.536	317.469	273.295	199.02	172.855	167.077	214.692	237.359	229.105
Cd14	40.343	-1.14341	0.241787	10.0077	0.0750167	0.804647	48.241	77.561	43.4427	41.6574	67.294	53.0861	30.8711	37.1005	8.64193	20.7476	21.9101	33.5631
Asns	15.9778	0.378985	0.362213	9.99134	0.0754811	0.808603	10.4522	17.3275	12.6124	14.4199	7.91694	17.6954	20.3618	30.355	30.2468	16.2372	2.43445	11.6741
Mcfd2	67.5626	0.118706	0.181422	9.98779	0.0755818	0.808659	88.4418	74.2605	62.3612	64.8895	52.2518	45.2215	78.1631	86.849	83.5387	73.0675	46.2546	55.4521
Fxn	2.96444	0.13048	0.788612	9.97149	0.0760472	0.81261	7.23615	1.65023	2.10206	2.40331	0	3.9323	5.25466	2.52958	7.20161	1.80414	0	1.45927
Mrps18c	42.1303	-0.0359459	0.215668	9.96551	0.0762183	0.813285	39.3968	36.3052	27.3268	56.8784	49.8767	43.2553	34.8121	35.4142	25.9258	44.2013	52.3407	59.8299
Rpa2	6.36429	0.357903	0.549626	9.96258	0.0763026	0.813285	5.62812	7.42605	6.30619	5.60773	2.37508	3.9323	13.7935	15.1775	10.0823	3.60827	2.43445	0
Gask1b	17.7267	0.199857	0.328632	9.95612	0.0764883	0.814239	23.3165	19.8028	25.9255	8.01105	11.0837	11.7969	18.3913	28.6686	25.9258	19.8455	9.7378	10.2149
Kif5b	39.531	0.0366368	0.221623	9.95011	0.0766612	0.814745	42.6129	40.4307	48.3475	33.6464	29.2927	37.3569	49.2625	43.0029	63.3742	31.5724	21.9101	33.5631
Slc1a5	3.36843	0.232544	0.714027	9.94779	0.0767283	0.814745	2.41205	1.65023	9.80963	3.20442	2.37508	0	5.25466	3.37278	7.20161	2.7062	2.43445	0
Nqo1	4.11757	-1.74555	0.746672	9.94235	0.0768854	0.81539	2.41205	0	6.30619	7.20994	9.50033	13.7631	0.656833	0.843194	0	3.60827	3.65168	1.45927
Impa2	5.03957	0.317942	0.606188	9.93442	0.0771149	0.81584	5.62812	3.30047	6.30619	6.40884	1.58339	1.96615	6.56833	1.68639	15.8435	6.31447	4.8689	0
Mthfd2	17.0031	0.111606	0.347565	9.93422	0.0771206	0.81584	9.6482	25.5786	7.70757	24.8342	11.8754	19.6615	15.1072	29.5118	21.6048	20.7476	6.08613	11.6741
Bcl2l1	35.6725	-0.125827	0.267816	9.92885	0.0772766	0.816469	39.3968	53.6326	39.2385	28.0387	30.8761	27.5261	45.3215	36.2573	51.8516	46.0055	10.955	18.9705	3
P4ha1	36.6286	-0.293554	0.238773	9.91174	0.077775	0.820711	40.2008	28.054	56.7557	51.2707	36.4179	29.4923	26.9302	37.9437	38.8887	50.5158	25.5617	17.5112
Ophn1	3.97796	0.498517	0.66987	9.90437	0.0779908	0.821962	1.60803	2.47535	3.50344	0.801105	4.75016	5.89845	1.9705	5.90236	7.20161	0	4.8689	8.7556
Bri3	205.951	0.0293978	0.127925	9.89632	0.0782269	0.822475	142.311	214.53	188.485	216.298	240.675	224.141	179.315	193.935	175.719	214.692	250.748	230.564
Calm1	324.029	-0.111364	0.11331	9.89608	0.0782338	0.822475	321.607	367.177	355.249	385.331	273.926	312.618	318.564	307.766	361.521	359.023	233.707	291.853
Oas1b	3.74262	0.410432	0.720649	9.88855	0.0784553	0.823781	1.60803	0	5.6055	7.20994	4.75016	0	1.31367	0.843194	5.76129	5.41241	3.65168	8.7556	2
Tmx4	21.4688	0.193207	0.285264	9.88043	0.0786949	0.825273	30.5526	22.2782	23.8234	18.4254	11.8754	13.7631	30.8711	28.6686	28.8064	19.8455	17.0412	11.6741	4
Tomm40	18.8022	-0.335547	0.303283	9.86833	0.0790533	0.828005	21.7085	27.2289	33.633	16.8232	12.6671	13.7631	16.4208	22.7662	24.4855	10.8248	12.1723	13.1334
C1qbp	34.22	0.0809678	0.236052	9.85998	0.0793012	0.829575	44.2209	42.9061	37.1365	23.232	21.3757	31.4584	37.4395	44.6893	47.5306	32.4744	21.9101	26.2668
Psenen	52.0114	0.238648	0.205293	9.84442	0.0797655	0.833402	50.6531	34.6549	36.4358	37.6519	67.294	58.9845	41.3805	39.6301	63.3742	50.5158	70.5991	72.9633
Gadd45g	12.9024	-0.268104	0.377124	9.83889	0.0799311	0.833512	8.84418	6.60094	17.5172	31.2431	15.8339	7.8646	10.5093	10.9615	11.5226	17.1393	10.955	5.83707
Kpnb1	40.1703	0.154762	0.238923	9.83749	0.0799731	0.833512	60.3013	50.3321	42.742	31.2431	26.1259	17.6954	37.4395	63.2396	44.65	36.9848	30.4306	40.8595
Fdft1	14.1436	0.0111862	0.353089	9.81681	0.0805955	0.836128	17.6884	15.6772	17.5172	15.221	11.0837	5.89845	18.3913	20.2367	20.1645	17.1393	4.8689	5.83707
Hcls1	79.8214	-0.227008	0.168746	9.81633	0.0806099	0.836128	77.9896	81.6866	131.729	70.4972	76.7943	80.6122	77.5063	70.8283	95.0613	67.6551	55.9924	71.5041
Mmp9	3.91463	-0.582381	0.693718	9.81602	0.0806192	0.836128	12.0603	8.25117	2.80275	2.40331	0	3.9323	5.25466	2.52958	1.44032	2.7062	1.21723	4.3778
Set	63.0686	-0.0602222	0.188594	9.82368	0.0803882	0.836128	86.8338	70.135	65.8647	62.4862	43.5432	53.0861	74.879	64.0828	57.6129	55.9282	37.734	84.6375
Rpn1	38.9858	0.171484	0.236557	9.78489	0.0815648	0.843867	33.7687	35.48	50.4495	44.0608	23.7508	33.4246	53.8603	44.6893	41.7693	58.6344	30.4306	17.5112
Xbp1	37.7972	-0.239487	0.230694	9.7857	0.0815401	0.843867	38.5928	31.3545	72.8715	36.0497	29.2927	41.2892	32.8416	27.8254	47.5306	33.3765	37.734	24.8075
Mettl8	3.0202	0.201131	0.774001	9.76835	0.0820715	0.847898	4.02008	3.30047	3.50344	0	6.33355	0	4.59783	3.37278	5.76129	0	2.43445	2.91853
Srgap2	27.862	0.0793529	0.264342	9.76563	0.0821549	0.847898	16.0803	14.8521	25.9255	35.2486	38.793	33.4246	22.3323	24.4526	18.7242	26.16	38.9512	39.4002
Ing4	15.2128	-0.190826	0.33604	9.75276	0.0825515	0.849919	13.6683	9.07629	11.211	12.8177	22.1674	29.4923	10.5093	11.8047	8.64193	10.8248	21.9101	20.4297
Tmem64	5.13547	0.0785992	0.586363	9.75542	0.0824696	0.849919	4.8241	8.25117	7.00688	7.20994	2.37508	0	8.53883	5.05916	5.76129	9.92275	1.21723	1.45927
Kif23	4.76877	0.093168	0.620345	9.74504	0.0827902	0.851341	4.8241	7.42605	4.20413	6.40884	3.16678	0	8.53883	13.4911	2.88064	3.60827	1.21723	1.45927
Mlh1	3.62743	-0.030419	0.703295	9.71964	0.0835802	0.856616	4.8241	2.47535	5.6055	2.40331	0	5.89845	3.941	0.843194	5.76129	1.80414	1.21723	8.7556
Ms4a14	17.3659	-0.768846	0.338884	9.71879	0.0836069	0.856616	15.2763	10.7265	23.1227	29.6409	26.1259	23.5938	5.25466	10.1183	7.20161	13.531	21.9101	21.889
Myo1e	31.6354	0.381839	0.242959	9.72324	0.0834678	0.856616	28.1406	22.2782	42.0413	28.8398	22.1674	21.6277	36.7826	37.9437	57.6129	31.5724	31.6479	18.9705
Bzw1	66.2014	0.0131643	0.185235	9.70425	0.0840622	0.8592	71.5575	96.5387	67.9667	55.2762	52.2518	51.1199	59.7718	80.1034	90.7403	64.9489	48.689	55.4521
Haus3	3.76155	-0.453412	0.728313	9.70488	0.0840426	0.8592	7.23615	2.47535	4.90482	3.20442	6.33355	0	6.56833	2.52958	10.0823	1.80414	0	0
Ftl1	7415.53	0.431106	0.102879	9.68537	0.084657	0.862644	6334.04	6901.28	8150.4	6045.94	5188.76	5418.71	8329.3	8132.61	9429.79	9588.08	8355.04	7112.47	4
Aldoc	11.1832	0.314464	0.404173	9.68386	0.0847048	0.862644	19.2964	17.3275	7.70757	7.20994	3.95847	5.89845	20.3618	10.9615	10.0823	15.3352	7.30335	8.7556
Skp1	61.8323	-0.177547	0.185735	9.68911	0.0845389	0.862644	54.6731	72.6103	56.7557	51.2707	59.377	100.274	52.5466	53.9644	64.8145	39.691	57.2096	78.8004
Tifab	11.2761	-0.454378	0.432223	9.67018	0.0851386	0.865637	14.4723	3.30047	11.211	16.8232	11.8754	17.6954	5.25466	5.05916	2.88064	9.02068	23.1273	14.5927	2
Abcd1	24.9414	0.0401383	0.265627	9.66493	0.0853056	0.865637	16.8844	13.2019	24.5241	28.8398	36.4179	29.4923	17.7345	18.5503	25.9258	26.16	35.2995	26.2668
Aurkb	3.25617	0.26352	0.774984	9.6657	0.0852809	0.865637	5.62812	4.12559	0.700688	1.60221	2.37508	1.96615	9.19566	8.43194	1.44032	3.60827	0	0
Prpf40a	21.9437	-0.218996	0.287184	9.64557	0.0859238	0.870866	28.9446	20.6279	27.3268	17.6243	16.6256	27.5261	26.9302	19.3935	24.4855	14.4331	7.30335	32.1039
Lsm6	11.6308	0.180036	0.387961	9.63296	0.0863287	0.873923	20.1004	11.5516	17.5172	8.01105	3.95847	5.89845	18.3913	15.1775	11.5226	9.92275	7.30335	10.2149
Nudt9	26.9165	-0.36069	0.276361	9.61563	0.0868881	0.876441	19.2964	16.5023	24.5241	49.6685	32.4594	43.2553	16.4208	19.3935	21.6048	27.062	35.2995	17.5112
Rhov	13.4847	0.377752	0.358563	9.6176	0.0868245	0.876441	4.8241	6.60094	14.0138	14.4199	15.0422	15.7292	9.85249	8.43194	11.5226	20.7476	15.8239	24.8075
Ubl7	21.316	-0.339734	0.285773	9.61897	0.08678	0.876441	21.7085	15.6772	17.5172	31.2431	32.4594	23.5938	15.1072	13.4911	11.5226	27.9641	27.9962	17.5112
Dyrk2	9.33593	-0.103286	0.432798	9.59761	0.0874736	0.881296	5.62812	9.07629	3.50344	8.81215	14.2505	15.7292	5.25466	4.21597	7.20161	7.21654	12.1723	18.9705
Dpep2	29.54	-0.837687	0.254789	9.59046	0.0877067	0.882595	33.7687	35.48	25.2248	34.4475	51.4601	45.2215	22.3323	16.0207	12.9629	16.2372	36.5168	24.8075	1
Tes	10.7542	-0.648691	0.4392	9.57544	0.0881985	0.886489	13.6683	18.1526	14.7144	12.8177	12.6671	3.9323	12.4798	15.1775	14.4032	8.11861	0	2.91853
Mcoln2	25.0155	-0.496132	0.294546	9.56696	0.0884772	0.887891	16.8844	35.48	30.8303	31.2431	36.4179	19.6615	11.823	19.3935	10.0823	18.0414	42.6029	27.7261	2
Cdc42ep2	3.40631	-1.06021	0.750235	9.56482	0.0885477	0.887891	0.804017	9.90141	3.50344	7.20994	3.95847	1.96615	0	3.37278	1.44032	3.60827	3.65168	1.45927
Eva1b	7.31	-0.0913944	0.484259	9.56147	0.0886583	0.887947	6.43213	4.12559	4.90482	7.20994	12.6671	7.8646	4.59783	2.52958	5.76129	6.31447	19.4756	5.83707	2
Trim35	50.7497	0.176391	0.209553	9.55207	0.0889689	0.890005	55.4772	48.6819	44.1433	60.0828	42.7515	31.4584	54.5171	80.9466	48.971	69.4592	31.6479	40.8595
Plod3	31.0144	-0.130175	0.241146	9.54303	0.0892685	0.891947	30.5526	17.3275	30.1296	35.2486	43.5432	37.3569	27.587	18.5503	27.3661	26.16	38.9512	39.4002
Il7r	28.2177	0.368761	0.25439	9.51507	0.0902009	0.899141	15.2763	16.5023	23.8234	28.0387	26.1259	39.323	23.646	25.2958	23.0452	30.6703	40.1684	46.6965
Taldo1	233.445	0.0697467	0.13608	9.51604	0.0901685	0.899141	180.904	226.082	301.996	217.099	190.007	253.633	189.825	200.68	295.266	246.265	283.614	215.971
App	101.491	-0.264727	0.163153	9.50467	0.0905503	0.900502	136.683	110.566	113.511	123.37	89.4614	88.4768	88.0156	96.1241	123.868	112.758	76.6852	58.3707
Tgfbr1	29.7297	-0.327771	0.247178	9.50695	0.0904734	0.900502	49.045	33.0047	31.531	21.6298	23.7508	41.2892	39.41	26.139	25.9258	20.7476	19.4756	24.8075
mt-Nd4	835.356	0.0800783	0.14382	9.48372	0.0912573	0.901427	1005.02	1139.49	1016	600.828	565.269	635.067	803.964	844.037	934.769	893.047	833.799	752.982	4
Csf1	16.6697	-1.06937	0.339269	9.49728	0.0907991	0.901427	15.2763	25.5786	22.422	15.221	23.7508	29.4923	3.941	10.9615	14.4032	5.41241	14.6067	18.9705
Cul3	21.323	0.203319	0.289954	9.48298	0.0912824	0.901427	25.7285	24.7535	25.9255	17.6243	15.8339	7.8646	21.0187	32.8846	34.5677	18.0414	17.0412	14.5927
Slfn9	6.62114	0.690355	0.533086	9.49031	0.0910345	0.901427	3.21607	0.825117	6.30619	12.8177	6.33355	1.96615	5.25466	3.37278	5.76129	9.02068	15.8239	8.7556
Tagln2	129.194	-0.327452	0.145883	9.48603	0.0911792	0.901427	151.155	168.324	153.451	148.204	127.463	112.071	149.101	136.597	116.666	111.856	86.423	89.0153
Tlr4	16.6256	-0.404435	0.330317	9.48547	0.0911982	0.901427	16.8844	8.25117	17.5172	21.6298	23.7508	23.5938	7.22516	8.43194	12.9629	19.8455	14.6067	24.8075
Gm10925	265.669	0.0560968	0.156597	9.47068	0.0917003	0.904498	326.431	397.706	287.983	212.293	169.422	196.615	254.851	279.097	270.781	303.997	249.531	239.32	4
Lztr1	11.1376	-0.36874	0.403867	9.44486	0.0925825	0.911708	10.4522	8.25117	9.10894	13.6188	20.584	11.7969	7.22516	4.21597	10.0823	17.1393	18.2584	2.91853
Uqcrfs1	32.4104	-0.137065	0.238547	9.44299	0.0926467	0.911708	36.1808	45.3814	23.8234	37.6519	26.9176	33.4246	36.1258	44.6893	15.8435	36.0827	27.9962	24.8075
Rars	27.8703	0.139997	0.259045	9.43832	0.0928074	0.912229	40.2008	41.2559	23.8234	18.4254	17.4173	19.6615	30.8711	40.4733	28.8064	24.3558	24.3445	24.8075
Rps12	256.929	0.29712	0.122946	9.43079	0.0930668	0.913717	225.929	279.715	218.615	253.149	201.882	204.48	313.966	316.198	272.221	331.961	266.572	198.46
Enc1	12.9289	0.230785	0.368913	9.42358	0.0933158	0.914042	25.7285	11.5516	14.7144	5.60773	9.50033	5.89845	22.3323	10.9615	12.9629	10.8248	13.3895	11.6741	3
Susd6	38.6176	-0.293937	0.228192	9.42648	0.0932154	0.914042	26.5326	41.2559	38.5378	44.8619	53.0435	49.1538	24.9597	26.9822	21.6048	49.6137	40.1684	46.6965
Gstm1	86.4738	0.626303	0.184039	9.41954	0.0934554	0.914351	48.241	71.7852	70.7695	54.4751	66.5023	94.3752	77.5063	78.4171	80.658	113.661	148.502	132.793
Camk2d	28.7364	-0.0199687	0.260276	9.41224	0.0937086	0.915769	45.0249	34.6549	32.2316	22.4309	22.9591	15.7292	34.8121	45.5325	21.6048	24.3558	20.6928	24.8075
Hmgcs1	32.4743	0.0223655	0.260797	9.4081	0.0938524	0.916116	41.8089	48.6819	38.5378	28.8398	17.4173	19.6615	32.1848	49.7485	23.0452	34.2786	36.5168	18.9705	4
Slc25a44	9.2873	0.219875	0.44399	9.37219	0.0951085	0.927307	8.84418	13.2019	7.70757	3.20442	11.8754	5.89845	19.705	13.4911	2.88064	5.41241	13.3895	5.83707
H2ac18	13.2758	0.113061	0.359104	9.36584	0.095332	0.928417	5.62812	9.90141	14.0138	11.2155	14.2505	21.6277	6.56833	10.1183	11.5226	18.9434	12.1723	23.3483
Fscn1	4.27351	-1.58427	0.713431	9.36026	0.0955292	0.929268	10.4522	5.77582	1.40138	1.60221	7.91694	11.7969	3.941	5.05916	0	0.902068	2.43445	0
Selenoh	15.3581	0.451459	0.334331	9.35678	0.0956519	0.929394	16.8844	15.6772	14.0138	15.221	9.50033	5.89845	27.587	21.0799	23.0452	17.1393	10.955	7.29633
Gm49980	5.49818	0.297417	0.569715	9.29782	0.0977587	0.948775	8.04017	5.77582	7.00688	7.20994	1.58339	0	12.4798	8.43194	2.88064	7.21654	2.43445	2.91853
Fcrls	4.34894	-0.421502	0.645351	9.2845	0.0982404	0.951395	8.84418	11.5516	2.80275	1.60221	3.95847	1.96615	5.25466	6.74555	4.32097	2.7062	2.43445	0
Pnrc2	27.7459	0.0134029	0.267406	9.28414	0.0982535	0.951395	31.3567	35.48	19.6193	20.0276	39.5847	17.6954	21.6755	26.9822	33.1274	18.0414	47.4718	21.889
Mettl7a1	18.4289	0.379215	0.309764	9.27751	0.098494	0.952634	13.6683	13.2019	9.80963	22.4309	18.209	17.6954	18.3913	16.8639	8.64193	27.9641	35.2995	18.9705
Cyria	14.889	-0.473417	0.346025	9.26564	0.0989264	0.955723	7.23615	14.027	18.9186	18.4254	20.584	23.5938	7.22516	8.43194	10.0823	9.02068	20.6928	20.4297
Rpl4	272.452	0.123383	0.124516	9.2614	0.0990811	0.956127	295.878	305.293	279.574	226.713	201.09	259.532	298.202	318.727	321.192	309.409	227.621	226.186
Dhfr	4.60717	-0.451632	0.620467	9.25292	0.0993915	0.95803	8.84418	8.25117	9.80963	3.20442	0.791694	1.96615	5.25466	4.21597	5.76129	4.51034	1.21723	1.45927
Eif5	40.869	-0.231395	0.221374	9.24069	0.0998406	0.958253	53.0651	47.8568	51.8509	40.0552	30.8761	39.323	60.4286	43.0029	36.0081	26.16	26.779	35.0224	3
Eloa	28.5306	-0.151557	0.252843	9.23645	0.0999964	0.958253	20.1004	28.054	18.2179	42.4585	40.3764	31.4584	19.0482	21.923	23.0452	32.4744	31.6479	33.5631
Emilin2	26.8498	-0.0184401	0.271892	9.24053	0.0998464	0.958253	34.5727	26.4037	28.7282	27.2376	20.584	21.6277	36.1258	34.571	37.4484	28.8662	8.52058	17.5112
Msh2	3.60107	0.589042	0.734049	9.24872	0.0995454	0.958253	6.43213	0	4.20413	3.20442	0.791694	1.96615	5.9115	1.68639	4.32097	1.80414	1.21723	11.6741
Nfe2l2	79.3538	-0.396923	0.191257	9.23381	0.100094	0.958253	65.9294	150.996	77.7764	84.116	107.67	58.9845	60.4286	71.6715	53.2919	62.2427	80.3369	78.8004
Srebf2	28.4388	0.159606	0.259493	9.23951	0.099884	0.958253	36.1808	37.1303	29.4289	28.0387	22.1674	7.8646	36.7826	38.7869	30.2468	31.5724	18.2584	24.8075
Rab3il1	36.6306	0.0662919	0.246586	9.21679	0.100723	0.9621	67.5374	34.6549	28.0275	17.6243	37.2096	35.3907	47.9488	35.4142	31.6871	37.8868	34.0823	32.1039	3
Treml2	4.76984	-0.0171511	0.66151	9.217	0.100716	0.9621	1.60803	0	2.10206	9.61326	10.292	7.8646	1.9705	3.37278	2.88064	9.02068	1.21723	7.29633
Rps13-ps1	96.9188	0.106522	0.155372	9.20749	0.101069	0.964312	100.502	90.7629	125.423	93.7292	80.7528	68.8153	113.632	83.4762	126.748	103.738	93.7264	81.7189
Srm	11.6653	0.179027	0.385045	9.18589	0.101875	0.970915	13.6683	13.2019	21.0206	7.20994	7.12524	3.9323	11.1662	19.3935	17.2839	9.92275	7.30335	8.7556	4
Fubp1	17.5547	0.130822	0.311676	9.16714	0.10258	0.975624	17.6884	23.1033	27.3268	9.61326	11.8754	11.7969	21.6755	21.923	24.4855	11.7269	13.3895	16.0519
Nup107	3.4409	0.0359216	0.700598	9.16661	0.1026	0.975624	4.02008	3.30047	3.50344	4.00552	0	5.89845	3.941	2.52958	5.76129	5.41241	0	2.91853
Rps8	338.795	0.252291	0.112517	9.16341	0.102721	0.975678	335.275	349.85	339.133	314.033	250.175	269.363	417.089	392.085	394.648	383.379	335.954	284.557	4
Myo1f	116.892	0.0421692	0.164056	9.15607	0.102999	0.977218	110.15	71.7852	120.518	147.403	124.296	114.037	95.2408	93.5946	118.106	104.64	142.415	160.519
Cdkn2c	8.06506	-0.0659693	0.492212	9.11877	0.104419	0.988967	11.2562	12.3768	7.70757	6.40884	7.12524	1.96615	11.1662	16.0207	12.9629	5.41241	0	4.3778
Smim14	67.3252	0.305815	0.194732	9.11743	0.104471	0.988967	53.8691	60.2335	46.2454	56.8784	83.9195	53.0861	55.174	48.9053	80.658	64.0468	107.116	97.7709
Polr2l	32.918	0.122271	0.243846	9.09446	0.105355	0.996225	35.3767	47.0317	41.3406	25.6353	21.3757	19.6615	41.3805	41.3165	33.1274	40.5931	21.9101	26.2668
H2-Aa	5.67847	-0.729934	0.551878	7.77499	0.16908	0.999981	4.02008	4.12559	3.50344	7.20994	9.50033	13.7631	3.28416	2.52958	1.44032	2.7062	7.30335	8.7556	1
H2-Ab1	4.83745	-0.0028235	0.604581	8.01221	0.155564	0.999981	4.02008	4.9507	3.50344	1.60221	4.75016	7.8646	1.9705	2.52958	5.76129	0.902068	8.52058	11.6741	1
Ifnar2	55.0494	0.0281231	0.200809	4.7486	0.447325	0.999981	49.849	56.9331	47.6468	50.4696	59.377	57.0184	38.0963	54.8076	67.6951	38.7889	66.9474	72.9633	1
Myo18a	12.0355	0.229264	0.411473	2.92385	0.711724	0.999981	6.43213	5.77582	7.70757	14.4199	23.7508	11.7969	13.7935	16.0207	8.64193	14.4331	8.52058	13.1334	1
Rcbtb2	84.7282	0.0908231	0.165308	2.94598	0.708314	0.999981	97.286	84.9871	71.4702	76.906	72.8358	88.4768	99.8386	77.5739	73.4564	81.1861	102.247	90.4745	1
Tmem176b	5.20646	-1.14085	0.615683	8.88385	0.113788	0.999981	3.21607	5.77582	3.50344	4.80663	8.70863	15.7292	4.59783	1.68639	0	1.80414	2.43445	10.2149	1
Anxa6	40.5255	0.0186235	0.222821	2.73803	0.740296	0.999981	35.3767	42.081	35.0344	45.663	44.3349	37.3569	44.6646	31.1982	34.5677	36.9848	59.644	39.4002	2
Arel1	13.9627	-0.24453	0.351441	3.88129	0.566632	0.999981	13.6683	11.5516	10.5103	19.2265	23.7508	11.7969	8.53883	9.27514	15.8435	14.4331	15.8239	13.1334	2
Atp13a2	83.5048	0.07219	0.180515	6.7551	0.2395	0.999981	99.6981	66.0094	71.4702	80.1105	99.7534	64.883	79.4768	79.2603	66.2548	64.9489	119.288	110.904	2
Cdkn1a	213.846	-0.383016	0.136829	3.26161	0.659724	0.999981	242.009	231.858	229.826	272.376	281.843	188.75	178.002	163.58	158.435	182.218	215.449	221.809	2
Cnppd1	31.2032	-0.102687	0.244837	8.50458	0.130533	0.999981	28.9446	33.8298	23.1227	28.0387	33.2511	43.2553	21.6755	26.139	20.1645	25.2579	42.6029	48.1558	2
Fgd4	10.9694	0.643975	0.416689	6.58528	0.253355	0.999981	4.02008	2.47535	16.1158	12.0166	11.0837	7.8646	10.5093	9.27514	11.5226	18.0414	9.7378	18.9705	2
Fndc3a	20.9094	-0.160765	0.309147	6.00984	0.305263	0.999981	13.6683	12.3768	16.8165	34.4475	34.0428	23.5938	15.1072	18.5503	18.7242	14.4331	24.3445	24.8075	2
Glul	25.0587	-0.27818	0.289677	7.6419	0.177107	0.999981	25.7285	28.054	24.5241	20.8287	39.5847	19.6615	18.3913	14.3343	12.9629	18.0414	37.734	40.8595	2
Mgat1	40.1701	0.0334281	0.226066	8.07236	0.152293	0.999981	28.1406	28.8791	35.7351	56.0773	35.6262	57.0184	37.4395	35.4142	24.4855	50.5158	47.4718	45.2373	2
Mpp1	105.098	0.200458	0.185485	7.88641	0.162608	0.999981	64.3213	85.8122	104.402	143.398	120.337	68.8153	97.8681	83.4762	97.9419	109.15	133.895	151.764	2
Mxd4	14.1851	-0.429266	0.359818	5.58619	0.348588	0.999981	12.0603	12.3768	11.211	16.0221	19.0007	27.5261	9.19566	6.74555	10.0823	15.3352	21.9101	8.7556	2
Oasl1	4.24583	0.089632	1.59221	4.94281	0.422899	0.999981	0	0	6.30619	16.0221	7.91694	0	1.31367	0	4.32097	6.31447	0	8.7556	2
Pik3ip1	4.24513	-0.00178495	0.71833	7.52422	0.18448	0.999981	0	3.30047	2.10206	7.20994	4.75016	7.8646	2.62733	2.52958	1.44032	4.51034	14.6067	0	2
Ptpn18	92.3718	-0.00466801	0.156532	7.61092	0.179022	0.999981	77.1856	92.4131	72.8715	96.9337	104.504	110.104	81.4473	80.9466	74.8967	91.1089	110.768	115.282	2
Snw1	25.7802	0.164276	0.262359	7.11944	0.211908	0.999981	21.7085	14.8521	21.0206	30.442	33.2511	23.5938	19.705	18.5503	27.3661	29.7682	34.0823	35.0224	2
Snx20	41.4876	-0.556929	0.221439	5.95722	0.310404	0.999981	41.0049	48.6819	40.6399	47.2652	61.7521	53.0861	26.9302	22.7662	34.5677	27.9641	45.0373	48.1558	2
Tent5a	7.81018	-0.627299	0.46718	5.36896	0.372529	0.999981	7.23615	4.9507	12.6124	14.4199	11.8754	5.89845	3.941	5.05916	4.32097	11.7269	7.30335	4.3778	2
Tlr3	6.63907	-0.436065	0.568227	8.61594	0.125399	0.999981	4.8241	1.65023	9.10894	13.6188	7.91694	5.89845	1.31367	3.37278	0	8.11861	12.1723	11.6741	2
Vcpip1	19.5013	0.0536561	0.300574	6.15719	0.291223	0.999981	12.8643	13.2019	18.2179	22.4309	23.7508	23.5938	9.85249	17.7071	27.3661	20.7476	19.4756	24.8075	2
Zc3hav1	33.0062	0.0503961	0.244243	7.94321	0.159393	0.999981	22.5125	23.1033	39.9392	48.0663	39.5847	21.6277	26.2733	25.2958	28.8064	37.8868	45.0373	37.9409	2
Abce1	19.1319	0.000377682	0.309038	6.34275	0.274281	0.999981	21.7085	18.9777	21.7213	20.0276	12.6671	17.6954	27.587	20.2367	31.6871	11.7269	10.955	14.5927	3
Actg1	748.905	-0.297511	0.118587	7.71214	0.17283	0.999981	978.488	1039.65	843.628	839.558	677.69	601.642	641.069	757.188	615.018	686.474	680.429	626.025	3
Adcy7	41.817	-0.115936	0.224481	2.06568	0.839984	0.999981	61.9093	43.7312	32.9323	40.8563	46.7099	35.3907	36.7826	43.0029	46.0903	39.691	42.6029	32.1039	3
Alas1	26.1471	0.087251	0.261345	3.38777	0.640434	0.999981	28.1406	33.0047	25.2248	20.0276	21.3757	25.56	32.1848	32.8846	28.8064	26.16	24.3445	16.0519	3
Angptl2	39.882	0.206441	0.218575	2.68045	0.749107	0.999981	45.829	38.7805	39.9392	29.6409	28.501	41.2892	45.3215	46.3757	48.971	42.3972	36.5168	35.0224	3
Bcar3	4.4047	0.824816	0.629821	3.57671	0.611814	0.999981	2.41205	4.12559	7.00688	3.20442	0.791694	1.96615	8.53883	4.21597	8.64193	2.7062	4.8689	4.3778	3
Bhlhe41	44.34	0.506203	0.215948	6.59737	0.252347	0.999981	43.4169	48.6819	35.0344	32.8453	22.9591	39.323	55.8308	64.926	50.4113	62.2427	41.3857	35.0224	3
Ccr1	8.15618	-0.774031	0.459259	5.30327	0.380001	0.999981	15.2763	14.027	8.40825	8.01105	7.91694	7.8646	10.5093	8.43194	5.76129	6.31447	2.43445	2.91853	3
Chst11	5.47558	-0.918912	0.604104	7.95445	0.158764	0.999981	13.6683	7.42605	7.00688	3.20442	6.33355	3.9323	9.19566	8.43194	1.44032	3.60827	0	1.45927	3
Cpeb2	12.541	0.353438	0.364799	2.91476	0.713126	0.999981	13.6683	13.2019	11.211	8.81215	10.292	7.8646	13.1367	22.7662	15.8435	10.8248	9.7378	13.1334	3
Cyp51	13.5126	0.17313	0.364053	6.42879	0.266702	0.999981	17.6884	19.8028	14.0138	11.2155	11.0837	1.96615	20.3618	18.5503	14.4032	12.6289	7.30335	13.1334	3
Dot1l	9.52064	0.451617	0.428111	5.56196	0.3512	0.999981	6.43213	10.7265	7.70757	6.40884	6.33355	9.83075	10.5093	23.6094	12.9629	9.02068	4.8689	5.83707	3
Eef1e1	11.9635	-0.56541	0.4018	4.89164	0.429248	0.999981	16.8844	24.7535	9.10894	10.4144	9.50033	15.7292	15.764	9.27514	12.9629	9.92275	4.8689	4.3778	3
Gclc	10.2989	0.0783013	0.418911	6.78516	0.237115	0.999981	17.6884	14.8521	9.80963	4.80663	8.70863	3.9323	16.4208	10.9615	12.9629	8.11861	3.65168	11.6741	3
Ggta1	26.3123	-0.265397	0.282828	3.45048	0.630893	0.999981	48.241	34.6549	23.1227	22.4309	19.0007	25.56	25.6165	16.8639	27.3661	19.8455	26.779	26.2668	3
Gm47283	28.8364	0.245147	0.267753	6.56408	0.25513	0.999981	24.1205	31.3545	28.7282	29.6409	26.1259	15.7292	40.7236	50.5916	36.0081	21.6496	19.4756	21.889	3
Gnl3	11.3662	-0.617345	0.422078	4.51728	0.477574	0.999981	15.2763	14.027	12.6124	16.0221	11.0837	9.83075	11.1662	21.923	5.76129	3.60827	4.8689	10.2149	3
Gnptab	21.113	0.342377	0.288626	5.84733	0.321359	0.999981	26.5326	20.6279	20.3199	19.2265	13.4588	11.7969	25.6165	30.355	23.0452	29.7682	19.4756	13.1334	3
Gtf2h2	6.0718	-0.117561	0.530483	4.64735	0.460414	0.999981	8.04017	8.25117	4.20413	8.81215	3.95847	3.9323	8.53883	10.9615	7.20161	3.60827	2.43445	2.91853	3
Hnrnpk	137.883	0.0722729	0.137083	8.46631	0.13234	0.999981	156.783	160.898	130.328	119.365	132.213	106.172	159.61	176.228	136.831	123.583	131.46	121.119	3
Hsp90aa1	80.9332	-0.208003	0.168373	3.09261	0.68571	0.999981	89.2459	97.3638	99.4977	72.0994	74.4192	90.4429	87.3588	85.1626	72.0161	74.8716	64.513	64.2077	3
Inf2	22.9971	0.154355	0.285572	6.67722	0.245774	0.999981	37.7888	21.453	27.3268	15.221	13.4588	17.6954	27.587	26.139	27.3661	26.16	18.2584	17.5112	3
Irf2bpl	13.851	0.349032	0.369725	6.27886	0.280022	0.999981	14.4723	11.5516	10.5103	9.61326	9.50033	15.7292	26.2733	22.7662	17.2839	11.7269	3.65168	13.1334	3
Kctd12	32.7856	-0.487572	0.24555	4.63719	0.461741	0.999981	45.0249	54.4577	37.1365	39.2541	33.2511	19.6615	25.6165	32.8846	27.3661	31.5724	19.4756	27.7261	3
Lasp1	78.7886	0.057901	0.167891	4.09571	0.53572	0.999981	84.4218	82.5117	95.2936	62.4862	64.1272	76.6799	89.3293	79.2603	90.7403	81.1861	69.3819	70.0448	3
Lcp1	225.554	-0.0418968	0.128977	7.1266	0.211394	0.999981	249.245	261.562	230.526	209.088	201.09	216.277	251.567	246.213	229.011	241.754	148.502	221.809	3
Mical2	8.33772	-0.163595	0.459231	5.90827	0.315247	0.999981	12.8643	9.90141	9.10894	8.81215	6.33355	3.9323	12.4798	15.1775	7.20161	4.51034	2.43445	7.29633	3
Myc	3.97459	-0.0605621	0.686641	6.61784	0.250648	0.999981	7.23615	9.07629	2.80275	0.801105	3.16678	1.96615	5.25466	5.90236	5.76129	4.51034	1.21723	0	3
Myh9	66.2695	-0.366844	0.19822	7.53391	0.183863	0.999981	101.306	72.6103	64.4633	71.2983	68.0857	66.8491	69.6243	84.3194	66.2548	52.3199	32.8651	45.2373	3
Niban2	106.472	0.106609	0.150854	7.79529	0.167884	0.999981	105.326	131.194	117.015	89.7237	83.9195	90.4429	119.544	131.538	118.106	110.052	96.1608	84.6375	3
Pakap	7.71857	-0.183305	0.465518	4.57334	0.470131	0.999981	12.8643	9.07629	4.20413	8.81215	6.33355	7.8646	9.19566	10.9615	2.88064	6.31447	9.7378	4.3778	3
Piezo1	39.034	0.278085	0.229133	7.38345	0.193648	0.999981	39.3968	33.0047	36.4358	41.6574	26.1259	33.4246	59.115	55.6508	47.5306	40.5931	21.9101	33.5631	3
Plaur	14.9415	-0.426402	0.363222	3.43056	0.633919	0.999981	15.2763	28.8791	11.9117	17.6243	11.8754	17.6954	11.1662	16.0207	18.7242	9.92275	15.8239	4.3778	3
Ptp4a1	56.4581	0.105044	0.195949	7.93995	0.159576	0.999981	68.3414	66.8345	48.3475	52.8729	33.2511	58.9845	57.8013	78.4171	61.9338	60.4385	45.0373	45.2373	3
Rbpj	25.2673	-0.503261	0.269428	8.33594	0.138668	0.999981	25.7285	41.2559	39.9392	20.8287	22.1674	27.5261	18.3913	24.4526	31.6871	19.8455	10.955	20.4297	3
Rgs1	34.5665	0.215691	0.525597	2.9211	0.712148	0.999981	27.3366	29.7042	22.422	21.6298	30.0844	43.2553	72.9085	70.8283	44.65	28.8662	8.52058	14.5927	3
Slc20a1	15.8761	-0.0441074	0.341338	6.25208	0.282457	0.999981	19.2964	23.9284	10.5103	13.6188	15.0422	13.7631	24.9597	21.0799	18.7242	13.531	7.30335	8.7556	3
Timm17a	25.7931	0.0239009	0.270133	3.45485	0.63023	0.999981	27.3366	35.48	24.5241	19.2265	17.4173	29.4923	19.0482	31.1982	20.1645	27.9641	25.5617	32.1039	3
Tnfrsf12a	5.21347	-1.34207	0.61879	6.94649	0.224651	0.999981	10.4522	9.07629	6.30619	4.00552	7.12524	5.89845	7.22516	5.90236	0	0	3.65168	2.91853	3
Top1	17.705	-0.26893	0.358478	5.32828	0.377143	0.999981	28.1406	33.0047	19.6193	7.20994	12.6671	17.6954	11.823	20.2367	21.6048	20.7476	10.955	8.7556	3
Tpm4	47.6103	-0.493671	0.207669	7.7128	0.17279	0.999981	57.0852	69.3098	63.7626	54.4751	40.3764	49.1538	48.6056	49.7485	36.0081	47.8096	24.3445	30.6446	3
Trmt61a	4.07717	1.04504	0.668944	5.92421	0.313664	0.999981	3.21607	6.60094	2.80275	0.801105	2.37508	0	2.62733	12.6479	2.88064	4.51034	6.08613	4.3778	3
Vdac2	141.346	-0.0484987	0.146611	4.62161	0.463779	0.999981	176.08	174.1	134.532	124.171	136.963	116.003	141.219	158.521	141.152	145.233	109.55	138.63	3
Ykt6	43.2838	0.0475643	0.221498	7.17316	0.208078	0.999981	54.6731	58.5833	35.7351	46.4641	28.501	31.4584	57.1445	48.0621	51.8516	32.4744	36.5168	37.9409	3
Arsb	45.006	0.445996	0.206062	3.71561	0.591043	0.999981	43.4169	41.2559	45.5447	36.8508	35.6262	25.56	55.174	58.1804	57.6129	55.9282	42.6029	42.3187	4
BC005537	213.756	-0.0214696	0.134905	4.13171	0.530614	0.999981	236.381	197.203	269.765	237.928	178.131	174.987	219.382	178.757	211.727	222.811	226.404	211.594	4
Bcl2a1b	93.166	-0.184483	0.162473	8.86979	0.114372	0.999981	106.13	142.745	98.0963	76.906	80.7528	92.4091	86.702	102.026	105.144	79.382	71.8163	75.8819	4
Cfl1	528.656	-0.0291754	0.111104	7.07061	0.215441	0.999981	568.44	631.215	560.55	501.492	440.973	503.335	548.456	558.195	541.561	607.092	456.46	426.106	4
Chchd4	12.073	-0.0845259	0.391496	4.76806	0.444837	0.999981	20.9044	13.2019	14.7144	6.40884	12.6671	5.89845	12.4798	15.1775	15.8435	8.11861	4.8689	14.5927	4
Col18a1	7.45324	0.210856	0.474991	1.49108	0.914097	0.999981	7.23615	7.42605	9.10894	11.2155	4.75016	1.96615	10.5093	8.43194	5.76129	7.21654	8.52058	7.29633	4
Colec12	39.2102	-0.109315	0.234883	5.66123	0.34059	0.999981	42.6129	56.9331	53.953	41.6574	22.9591	27.5261	42.0373	32.0414	38.8887	43.2993	29.2134	39.4002	4
Cxcl14	10.3583	0.367805	0.403204	5.91739	0.31434	0.999981	9.6482	12.3768	8.40825	11.2155	6.33355	5.89845	15.764	12.6479	14.4032	17.1393	6.08613	4.3778	4
Fth1	9281.09	0.225859	0.0909186	3.46587	0.628558	0.999981	8258.86	9392.31	9773.9	7879.67	7745.14	8364	10058.7	9958.12	10690.1	9284.98	10266.1	9701.2	4
Gm28661	151.246	-0.0806747	0.169524	7.90609	0.161488	0.999981	183.316	215.356	203.9	126.575	90.2531	127.8	149.101	155.991	126.748	152.449	130.243	153.223	4
Hspd1	40.5256	0.199639	0.221627	5.14526	0.398411	0.999981	37.7888	49.507	44.1433	28.8398	30.0844	37.3569	41.3805	55.6508	47.5306	50.5158	32.8651	30.6446	4
Igsf8	31.0564	0.0389145	0.246522	2.93451	0.710081	0.999981	35.3767	32.1796	28.0275	29.6409	21.3757	35.3907	28.9007	25.2958	40.329	27.062	26.779	42.3187	4
mt-Co1	4265.7	-0.0319615	0.117467	6.36114	0.272647	0.999981	4113.35	4165.19	4784.3	4196.19	4336.9	4067.97	3089.09	3715.96	4086.19	4185.59	5639.41	4808.28	4
mt-Nd2	359.071	-0.122011	0.150691	4.87453	0.431384	0.999981	418.089	501.671	459.651	275.58	254.925	363.738	336.955	317.041	347.118	379.771	327.434	326.876	4
Nptx1	2.84819	0.632477	0.790489	8.5599	0.127959	0.999981	4.02008	4.12559	2.10206	1.60221	0.791694	0	7.882	2.52958	7.20161	2.7062	1.21723	0	4
Pabpc1	203.886	0.219983	0.12603	5.70022	0.336489	0.999981	226.733	193.077	202.499	187.458	163.881	157.292	231.205	216.701	252.056	223.713	215.449	176.571	4
Pabpc4	13.5592	0.0755836	0.378487	5.06134	0.40844	0.999981	9.6482	16.5023	14.0138	13.6188	10.292	13.7631	19.0482	16.8639	18.7242	20.7476	3.65168	5.83707	4
Pcdh7	12.5032	-0.1787	0.371294	6.30867	0.277332	0.999981	19.2964	18.9777	17.5172	7.20994	9.50033	7.8646	11.1662	16.0207	15.8435	10.8248	8.52058	7.29633	4
Pdpn	10.5091	-0.634305	0.398864	3.48011	0.626399	0.999981	10.4522	11.5516	13.3131	12.0166	9.50033	19.6615	8.53883	8.43194	8.64193	7.21654	3.65168	13.1334	4
Phgdh	9.68995	0.28716	0.453072	6.17504	0.289557	0.999981	5.62812	4.9507	13.3131	8.01105	7.91694	11.7969	6.56833	11.8047	21.6048	17.1393	6.08613	1.45927	4
Sfpq	25.1607	0.134425	0.295852	7.59438	0.180053	0.999981	19.2964	31.3545	32.9323	14.4199	26.9176	17.6954	28.9007	30.355	46.0903	25.2579	9.7378	18.9705	4
Spred2	3.61258	0.0276352	0.707672	6.31583	0.276689	0.999981	3.21607	3.30047	8.40825	4.00552	2.37508	0	5.9115	6.74555	4.32097	3.60827	0	1.45927	4
St6galnac4	16.7809	0.337667	0.342045	2.33472	0.801154	0.999981	11.2562	21.453	14.0138	16.8232	17.4173	5.89845	19.0482	26.139	14.4032	16.2372	10.955	27.7261	4
Tkt	108.905	-0.080242	0.151088	7.2773	0.20082	0.999981	118.994	127.893	128.226	109.751	82.3362	106.172	112.318	112.988	122.427	119.073	86.423	80.2597	4
Tln1	77.7116	0.0853593	0.176029	6.93725	0.225349	0.999981	82.8137	78.3861	93.1915	66.4917	66.5023	64.883	97.8681	103.713	79.2177	83.8923	57.2096	58.3707	4
0610009B22Rik	11.8658	-0.459589	0.401243	1.79265	0.877027	0.999981	8.04017	16.5023	10.5103	12.0166	19.0007	15.7292	12.4798	8.43194	10.0823	7.21654	4.8689	17.5112
0610010F05Rik	3.92294	-0.342845	0.640366	2.74296	0.739541	0.999981	4.02008	7.42605	7.00688	3.20442	3.16678	1.96615	3.941	5.05916	2.88064	4.51034	2.43445	1.45927
0610010K14Rik	8.71017	-0.43174	0.442673	2.60022	0.761331	0.999981	14.4723	9.90141	9.80963	12.8177	8.70863	3.9323	7.22516	7.58875	7.20161	6.31447	12.1723	4.3778
0610012G03Rik	48.6397	0.0966692	0.201386	0.572979	0.989207	0.999981	38.5928	47.0317	47.6468	44.8619	54.6269	51.1199	51.233	55.6508	44.65	51.4179	48.689	48.1558
0610030E20Rik	6.22684	-0.349232	0.506437	0.441747	0.994101	0.999981	8.04017	8.25117	7.70757	7.20994	6.33355	3.9323	5.9115	5.90236	2.88064	5.41241	7.30335	5.83707
1110004F10Rik	38.8074	-0.148139	0.221661	3.32119	0.650599	0.999981	38.5928	43.7312	39.9392	36.8508	46.7099	39.323	33.4985	44.6893	36.0081	36.9848	47.4718	21.889
1110008P14Rik	33.9437	0.203	0.233406	6.66636	0.246659	0.999981	32.1607	43.7312	35.0344	36.0497	24.5425	17.6954	32.8416	41.3165	38.8887	46.9075	30.4306	27.7261
1110032A03Rik	7.18535	-0.115993	0.486758	4.2	0.520995	0.999981	8.84418	7.42605	2.80275	4.80663	6.33355	15.7292	5.25466	4.21597	5.76129	6.31447	8.52058	10.2149
1110038B12Rik	12.3528	0.167532	0.373086	5.67039	0.339624	0.999981	12.8643	10.7265	12.6124	15.221	11.8754	5.89845	16.4208	16.0207	20.1645	13.531	8.52058	4.3778
1110038F14Rik	8.70269	0.0915253	0.447826	1.15952	0.948702	0.999981	12.0603	7.42605	5.6055	11.2155	7.12524	5.89845	5.9115	7.58875	7.20161	8.11861	14.6067	11.6741
1110059E24Rik	5.37171	-0.164897	0.556131	0.338229	0.996862	0.999981	4.8241	4.12559	4.20413	7.20994	7.91694	5.89845	7.882	5.90236	5.76129	2.7062	3.65168	4.3778
1110059G10Rik	10.4731	0.415895	0.401645	0.805563	0.976677	0.999981	8.04017	9.90141	6.30619	11.2155	7.12524	11.7969	11.1662	9.27514	11.5226	13.531	17.0412	8.7556
1110065P20Rik	9.32501	0.341783	0.420178	5.37489	0.37186	0.999981	8.84418	9.90141	9.10894	4.80663	5.54186	9.83075	9.19566	10.9615	15.8435	4.51034	7.30335	16.0519
1190007I07Rik	5.02953	1.52676	0.626574	3.47082	0.627808	0.999981	2.41205	4.9507	2.10206	0.801105	3.95847	0	5.9115	5.05916	5.76129	3.60827	9.7378	16.0519
1500011B03Rik	22.7197	-0.048082	0.276708	5.23848	0.387475	0.999981	28.1406	23.1033	28.0275	24.8342	15.0422	19.6615	26.2733	21.923	31.6871	22.5517	18.2584	13.1334
1600010M07Rik	3.59602	0.46226	0.675197	1.64578	0.895658	0.999981	1.60803	3.30047	1.40138	2.40331	6.33355	3.9323	2.62733	5.90236	4.32097	4.51034	2.43445	4.3778
1600012H06Rik	9.84169	0.0395468	0.418881	1.43195	0.920787	0.999981	7.23615	11.5516	11.211	7.20994	15.0422	5.89845	13.1367	6.74555	7.20161	9.02068	12.1723	11.6741
1600014C10Rik	12.8847	0.165157	0.357917	4.13771	0.529765	0.999981	8.84418	9.90141	13.3131	17.6243	12.6671	9.83075	9.85249	8.43194	14.4032	17.1393	19.4756	13.1334
1700003F12Rik	3.42618	1.17994	0.782945	3.34402	0.64711	0.999981	3.21607	3.30047	0	1.60221	1.58339	1.96615	7.22516	5.90236	11.5226	0.902068	2.43445	1.45927
1700037H04Rik	20.8884	0.0424799	0.301401	2.03437	0.844369	0.999981	20.9044	13.2019	29.4289	21.6298	15.8339	23.5938	17.0777	17.7071	17.2839	24.3558	29.2134	20.4297
1700066M21Rik	2.94329	-0.00787068	0.791633	0.882947	0.971444	0.999981	5.62812	0	4.20413	2.40331	2.37508	3.9323	3.28416	4.21597	0	2.7062	3.65168	2.91853
1700123O20Rik	10.3827	0.265969	0.405154	2.18305	0.82328	0.999981	8.84418	14.027	5.6055	8.01105	13.4588	5.89845	9.85249	10.9615	8.64193	10.8248	10.955	17.5112
1810009A15Rik	16.1935	-0.0830774	0.347579	1.10077	0.954035	0.999981	17.6884	14.027	20.3199	16.8232	12.6671	17.6954	17.7345	25.2958	5.76129	14.4331	15.8239	16.0519
1810013L24Rik	21.4943	-0.411612	0.293744	3.26759	0.658806	0.999981	16.0803	29.7042	21.7213	21.6298	25.3342	33.4246	17.7345	16.8639	15.8435	12.6289	27.9962	18.9705
1810030O07Rik	10.0063	0.367828	0.408648	1.53518	0.908974	0.999981	7.23615	7.42605	9.80963	12.0166	6.33355	9.83075	7.22516	16.0207	11.5226	11.7269	12.1723	8.7556
1810037I17Rik	33.8159	-0.0775667	0.237071	3.34868	0.646398	0.999981	36.1808	39.6056	41.3406	41.6574	27.7093	21.6277	36.1258	42.1597	27.3661	33.3765	27.9962	30.6446
1810055G02Rik	3.37488	-0.480331	0.697626	2.58131	0.764203	0.999981	4.8241	5.77582	5.6055	0.801105	3.16678	3.9323	2.62733	2.52958	4.32097	1.80414	3.65168	1.45927
1810058I24Rik	83.0907	0.354013	0.176363	2.36718	0.796351	0.999981	55.4772	84.9871	77.0757	60.884	70.4608	94.3752	92.6134	94.4377	112.345	87.5006	92.5091	74.4226
2010315B03Rik	4.037	-0.516098	0.649826	3.49343	0.624381	0.999981	7.23615	3.30047	2.10206	5.60773	3.95847	5.89845	3.941	1.68639	1.44032	4.51034	7.30335	1.45927
2210016F16Rik	19.7592	0.0938231	0.304777	2.84555	0.723783	0.999981	18.4924	18.1526	18.9186	16.0221	19.0007	21.6277	17.0777	11.8047	14.4032	23.4538	30.4306	27.7261
2210016L21Rik	13.0895	-0.261754	0.367517	1.07444	0.956341	0.999981	15.2763	9.07629	14.0138	18.4254	10.292	19.6615	9.19566	10.9615	12.9629	12.6289	15.8239	8.7556
2300009A05Rik	11.6021	0.311086	0.384605	0.59209	0.988363	0.999981	8.84418	9.90141	11.9117	11.2155	12.6671	5.89845	11.1662	14.3343	8.64193	10.8248	13.3895	20.4297
2310001H17Rik	3.87553	0.366576	0.643542	2.74274	0.739574	0.999981	1.60803	4.12559	2.10206	3.20442	4.75016	3.9323	2.62733	2.52958	4.32097	2.7062	7.30335	7.29633
2310009B15Rik	7.68795	-0.175964	0.468072	5.28256	0.382378	0.999981	8.84418	5.77582	3.50344	8.81215	8.70863	13.7631	7.882	9.27514	1.44032	7.21654	9.7378	7.29633
2310011J03Rik	23.4704	-0.165309	0.279714	2.99904	0.700134	0.999981	28.1406	23.1033	17.5172	24.0331	25.3342	31.4584	26.2733	19.3935	17.2839	21.6496	32.8651	14.5927
2310022A10Rik	18.5279	0.0436167	0.31993	2.81003	0.729245	0.999981	25.7285	17.3275	14.0138	15.221	20.584	13.7631	13.7935	15.1775	12.9629	18.0414	27.9962	27.7261
2310022B05Rik	5.52911	-0.39125	0.590701	2.79604	0.731394	0.999981	7.23615	2.47535	12.6124	4.80663	5.54186	5.89845	7.22516	5.90236	2.88064	8.11861	3.65168	0
2310033P09Rik	3.80001	-0.414375	0.688178	2.72899	0.741681	0.999981	3.21607	4.9507	4.20413	1.60221	6.33355	3.9323	0.656833	1.68639	1.44032	5.41241	4.8689	7.29633
2310039H08Rik	4.50397	0.0777824	0.597299	2.02208	0.846081	0.999981	4.02008	4.12559	4.90482	5.60773	3.16678	3.9323	5.9115	7.58875	2.88064	6.31447	1.21723	4.3778
2310061I04Rik	8.34155	0.0223545	0.466008	4.05696	0.541245	0.999981	10.4522	3.30047	11.9117	7.20994	3.16678	15.7292	6.56833	8.43194	10.0823	4.51034	8.52058	10.2149
2410002F23Rik	5.11344	-0.286863	0.601819	2.18159	0.823491	0.999981	9.6482	7.42605	4.90482	5.60773	0.791694	5.89845	5.9115	5.90236	1.44032	3.60827	7.30335	2.91853
2410004B18Rik	7.51247	0.287008	0.475543	0.658341	0.985177	0.999981	7.23615	6.60094	5.6055	4.80663	7.91694	7.8646	5.25466	9.27514	14.4032	9.02068	4.8689	7.29633
2510009E07Rik	5.784	-0.0974318	0.543112	5.82733	0.323385	0.999981	7.23615	12.3768	4.20413	2.40331	6.33355	3.9323	5.9115	8.43194	8.64193	3.60827	4.8689	1.45927
2510039O18Rik	23.4291	-0.0533027	0.279221	2.11521	0.832985	0.999981	35.3767	22.2782	27.3268	19.2265	20.584	17.6954	22.3323	18.5503	27.3661	23.4538	20.6928	26.2668
2610001J05Rik	35.9435	-0.343673	0.228892	1.75573	0.881805	0.999981	41.8089	44.5563	41.3406	36.8508	32.4594	45.2215	30.2143	39.6301	36.0081	30.6703	29.2134	23.3483
2610002M06Rik	3.52918	-0.79299	0.710736	2.04166	0.843351	0.999981	5.62812	4.12559	4.20413	5.60773	3.95847	1.96615	0.656833	5.05916	5.76129	2.7062	1.21723	1.45927
2610301B20Rik	5.18666	0.670633	0.589809	2.41293	0.789547	0.999981	6.43213	9.07629	1.40138	2.40331	3.95847	1.96615	7.22516	4.21597	5.76129	8.11861	7.30335	4.3778
2610507B11Rik	55.1227	-0.0993863	0.19536	5.84306	0.32179	0.999981	74.7736	39.6056	58.1571	68.895	49.8767	51.1199	65.6833	49.7485	51.8516	53.222	40.1684	58.3707
2700062C07Rik	3.28593	0.430126	0.710807	1.95799	0.854926	0.999981	3.21607	1.65023	2.80275	4.00552	2.37508	1.96615	5.9115	2.52958	0	4.51034	6.08613	4.3778
2810004N23Rik	6.43402	-0.123307	0.543324	5.60384	0.346694	0.999981	12.0603	2.47535	7.70757	5.60773	3.16678	9.83075	10.5093	9.27514	4.32097	8.11861	1.21723	2.91853
2810006K23Rik	4.04974	-0.0754498	0.638644	5.47318	0.360895	0.999981	7.23615	4.12559	2.80275	0.801105	6.33355	3.9323	4.59783	5.05916	1.44032	1.80414	6.08613	4.3778
2810025M15Rik	9.39607	-0.0429608	0.458356	1.44612	0.919202	0.999981	7.23615	11.5516	6.30619	14.4199	4.75016	13.7631	11.1662	4.21597	14.4032	10.8248	9.7378	4.3778
2900060B14Rik	9.52826	0.169082	0.422122	1.47942	0.915433	0.999981	11.2562	12.3768	10.5103	7.20994	7.91694	3.9323	14.4503	9.27514	5.76129	9.02068	10.955	11.6741
3110082I17Rik	5.61286	-1.2895	0.572059	3.19437	0.670049	0.999981	8.84418	9.07629	4.20413	8.81215	8.70863	7.8646	6.56833	2.52958	1.44032	5.41241	2.43445	1.45927
3830406C13Rik	15.1459	0.374631	0.327983	2.37438	0.795283	0.999981	9.6482	12.3768	11.211	16.8232	13.4588	15.7292	12.4798	16.8639	15.8435	19.8455	17.0412	20.4297
4833420G17Rik	7.27573	0.0231399	0.469543	0.111339	0.999789	0.999981	8.04017	8.25117	4.90482	7.20994	5.54186	9.83075	6.56833	6.74555	8.64193	7.21654	8.52058	5.83707
4833439L19Rik	20.0247	-0.133932	0.30688	1.90626	0.861958	0.999981	20.1004	22.2782	15.4151	20.0276	15.0422	35.3907	17.7345	17.7071	23.0452	24.3558	14.6067	14.5927
4921524J17Rik	5.14275	0.150438	0.567119	1.77911	0.878786	0.999981	4.8241	4.9507	4.90482	4.00552	6.33355	3.9323	7.22516	7.58875	8.64193	5.41241	2.43445	1.45927
4930402H24Rik	4.32532	-0.639342	0.641845	2.03754	0.843926	0.999981	4.8241	4.12559	5.6055	8.01105	3.95847	3.9323	6.56833	4.21597	0	3.60827	1.21723	5.83707
4930430F08Rik	3.17706	0.453265	0.710706	1.50427	0.912576	0.999981	4.02008	3.30047	2.80275	0.801105	3.16678	1.96615	1.9705	5.05916	5.76129	2.7062	3.65168	2.91853
4930453N24Rik	9.40665	-0.4443	0.426017	1.03339	0.959828	0.999981	9.6482	9.07629	10.5103	12.8177	11.0837	11.7969	11.1662	8.43194	2.88064	7.21654	10.955	7.29633
4930503L19Rik	4.95706	0.0302112	0.564643	2.18814	0.822547	0.999981	3.21607	4.9507	4.20413	4.80663	3.16678	9.83075	5.9115	5.05916	2.88064	4.51034	3.65168	7.29633
4931406C07Rik	10.4007	0.125611	0.411971	1.34274	0.930473	0.999981	10.4522	6.60094	8.40825	9.61326	7.91694	17.6954	6.56833	11.8047	15.8435	12.6289	8.52058	8.7556
4932438A13Rik	5.99062	-0.231954	0.519427	3.94883	0.556806	0.999981	7.23615	3.30047	3.50344	8.01105	7.12524	9.83075	4.59783	4.21597	2.88064	9.02068	4.8689	7.29633
4933434E20Rik	20.4447	-0.143996	0.295221	2.54782	0.769276	0.999981	14.4723	27.2289	25.2248	23.232	23.7508	13.7631	14.4503	21.923	18.7242	18.0414	18.2584	26.2668
5031439G07Rik	79.9235	0.136063	0.171111	2.58671	0.763384	0.999981	79.5977	59.4084	72.1709	76.906	93.4199	74.7137	89.3293	74.2011	76.3371	86.5985	74.2508	102.149
5730409E04Rik	4.95588	0.360942	0.582348	2.1145	0.833085	0.999981	4.8241	4.9507	2.10206	5.60773	3.95847	3.9323	3.28416	3.37278	5.76129	9.02068	9.7378	2.91853
5730455P16Rik	3.02628	0.0471274	0.73112	1.07603	0.956203	0.999981	1.60803	4.9507	2.80275	3.20442	2.37508	1.96615	2.62733	1.68639	1.44032	2.7062	3.65168	7.29633
6030458C11Rik	5.29927	0.162932	0.553179	2.5241	0.772861	0.999981	3.21607	7.42605	7.00688	4.80663	3.16678	3.9323	2.62733	5.90236	4.32097	9.02068	4.8689	7.29633
6430548M08Rik	7.3846	0.236655	0.471237	3.22774	0.664921	0.999981	8.04017	4.9507	7.00688	6.40884	7.91694	5.89845	9.85249	4.21597	12.9629	9.92275	8.52058	2.91853
6820431F20Rik	27.0273	-0.416396	0.259134	4.45794	0.485531	0.999981	33.7687	28.054	25.2248	26.4365	38.0013	31.4584	19.705	21.923	15.8435	18.9434	32.8651	32.1039
8030462N17Rik	4.82773	0.473055	0.618201	1.06408	0.957233	0.999981	2.41205	0.825117	4.20413	5.60773	5.54186	5.89845	4.59783	10.1183	2.88064	2.7062	7.30335	5.83707
9030025P20Rik	4.51201	-0.237444	0.616395	1.36233	0.928389	0.999981	4.8241	3.30047	2.10206	5.60773	4.75016	9.83075	5.9115	5.90236	2.88064	2.7062	4.8689	1.45927
9130401M01Rik	11.837	-0.0213347	0.380545	2.13439	0.830255	0.999981	6.43213	13.2019	16.1158	12.0166	10.292	13.7631	10.5093	6.74555	14.4032	10.8248	14.6067	13.1334
9430038I01Rik	5.15472	-0.080289	0.553898	1.32934	0.931884	0.999981	6.43213	5.77582	6.30619	2.40331	5.54186	5.89845	5.9115	6.74555	5.76129	4.51034	3.65168	2.91853
9530068E07Rik	65.7917	-0.0204072	0.190845	5.11407	0.402118	0.999981	53.0651	62.7089	70.7695	94.5303	60.1687	57.0184	55.174	64.926	57.6129	69.4592	90.0747	53.9929
9630028I04Rik	3.337	0.159375	0.737202	3.65538	0.600018	0.999981	6.43213	0.825117	2.80275	4.80663	0.791694	3.9323	7.882	4.21597	1.44032	1.80414	3.65168	1.45927
9930021J03Rik	3.12943	0.401642	0.764589	1.97205	0.852999	0.999981	6.43213	3.30047	2.80275	0	2.37508	1.96615	2.62733	6.74555	1.44032	4.51034	2.43445	2.91853
A430005L14Rik	6.45156	-0.113465	0.518654	1.93731	0.85775	0.999981	4.02008	7.42605	8.40825	5.60773	10.292	3.9323	9.19566	7.58875	5.76129	1.80414	6.08613	7.29633
A530064D06Rik	5.18772	-0.0205801	0.608585	1.486	0.91468	0.999981	7.23615	4.12559	7.70757	8.01105	3.16678	0	1.31367	5.05916	8.64193	3.60827	6.08613	7.29633
A630001G21Rik	7.95825	-0.316514	0.476612	1.64922	0.895235	0.999981	10.4522	5.77582	9.80963	12.0166	8.70863	3.9323	7.882	4.21597	7.20161	3.60827	7.30335	14.5927
A930005H10Rik	3.48929	-0.728238	0.707514	1.61499	0.89943	0.999981	8.04017	4.9507	4.90482	4.80663	3.16678	0	3.28416	1.68639	1.44032	1.80414	4.8689	2.91853
AA465934	3.89955	-0.000842704	0.640852	1.77747	0.878999	0.999981	4.8241	4.12559	4.90482	3.20442	3.95847	1.96615	7.22516	5.05916	2.88064	4.51034	1.21723	2.91853
Aaas	7.62014	-0.463905	0.47104	2.82928	0.726286	0.999981	9.6482	10.7265	7.00688	10.4144	7.12524	7.8646	9.19566	7.58875	8.64193	8.11861	3.65168	1.45927
Aacs	10.2549	0.123706	0.442027	4.46348	0.484784	0.999981	12.8643	14.8521	10.5103	4.00552	6.33355	9.83075	15.764	11.8047	7.20161	18.9434	3.65168	7.29633
Aagab	19.3084	0.124943	0.309845	4.94803	0.422256	0.999981	17.6884	20.6279	16.1158	22.4309	26.9176	5.89845	22.3323	16.0207	12.9629	19.8455	30.4306	20.4297
Aak1	6.72178	-0.0124247	0.521697	1.14744	0.949819	0.999981	7.23615	4.12559	12.6124	7.20994	5.54186	3.9323	3.941	10.1183	2.88064	9.92275	7.30335	5.83707
Aamdc	7.25399	-0.300847	0.474908	2.68055	0.749091	0.999981	8.04017	9.90141	4.90482	8.01105	7.91694	7.8646	3.941	10.1183	4.32097	4.51034	7.30335	10.2149
Aamp	50.7256	-0.00635386	0.198292	1.81496	0.87411	0.999981	45.0249	44.5563	57.4564	52.8729	54.6269	49.1538	48.6056	43.8461	44.65	46.0055	62.0785	59.8299
Aar2	8.36733	0.00539184	0.444025	5.07664	0.406599	0.999981	10.4522	9.90141	11.211	5.60773	11.0837	1.96615	7.882	10.1183	7.20161	7.21654	13.3895	4.3778
Aarsd1	2.90809	0.196218	0.761963	7.20215	0.206035	0.999981	3.21607	4.9507	0.700688	3.20442	3.95847	0	3.28416	5.05916	0	5.41241	3.65168	1.45927
Aasdhppt	6.88172	-0.15731	0.489365	3.16439	0.674658	0.999981	8.84418	9.07629	7.70757	4.80663	5.54186	5.89845	9.19566	5.05916	7.20161	2.7062	4.8689	11.6741
Aatf	4.72279	0.250572	0.605767	4.38472	0.495454	0.999981	4.02008	2.47535	3.50344	7.20994	1.58339	7.8646	5.9115	8.43194	4.32097	7.21654	1.21723	2.91853
Aatk	8.02721	0.0889882	0.463296	1.63327	0.897197	0.999981	6.43213	3.30047	8.40825	12.0166	11.0837	5.89845	6.56833	8.43194	10.0823	9.02068	4.8689	10.2149
AB124611	17.6238	-0.738889	0.322292	5.83407	0.322701	0.999981	22.5125	27.2289	11.9117	16.8232	28.501	25.56	17.7345	10.9615	10.0823	9.02068	19.4756	11.6741
Abca2	8.43872	-0.170383	0.441672	4.10757	0.534034	0.999981	9.6482	12.3768	7.70757	12.8177	7.12524	3.9323	12.4798	7.58875	7.20161	9.92275	6.08613	4.3778
Abca3	18.1924	0.169758	0.318671	1.09765	0.954312	0.999981	22.5125	18.1526	15.4151	12.8177	12.6671	21.6277	19.0482	16.0207	12.9629	22.5517	25.5617	18.9705
Abca7	4.84574	0.347932	0.62401	1.41785	0.92235	0.999981	3.21607	1.65023	4.20413	3.20442	4.75016	9.83075	3.941	5.90236	7.20161	4.51034	9.7378	0
Abcb1a	2.82172	0.050678	0.766319	3.37161	0.642898	0.999981	1.60803	1.65023	4.90482	3.20442	2.37508	1.96615	0.656833	1.68639	2.88064	2.7062	7.30335	2.91853
Abcb1b	7.14632	-0.402209	0.471035	1.08783	0.955175	0.999981	6.43213	8.25117	7.00688	9.61326	7.91694	9.83075	5.9115	6.74555	4.32097	9.02068	4.8689	5.83707
Abcb4	3.09289	0.691644	0.717338	1.99722	0.84953	0.999981	3.21607	0.825117	4.20413	2.40331	1.58339	1.96615	3.28416	2.52958	4.32097	4.51034	2.43445	5.83707
Abcb6	5.74901	-0.163197	0.523202	1.55131	0.907074	0.999981	6.43213	6.60094	8.40825	5.60773	4.75016	3.9323	5.9115	5.90236	7.20161	4.51034	2.43445	7.29633
Abcb7	6.75112	-0.0409248	0.522193	1.09236	0.954778	0.999981	3.21607	10.7265	8.40825	8.81215	3.16678	7.8646	9.19566	8.43194	2.88064	5.41241	8.52058	4.3778
Abcb8	11.8857	0.416801	0.383629	1.13158	0.951271	0.999981	10.4522	10.7265	9.10894	10.4144	7.12524	13.7631	19.705	10.1183	10.0823	15.3352	17.0412	8.7556
Abcc1	15.3875	0.0569709	0.333432	1.35591	0.929075	0.999981	12.8643	14.8521	20.3199	11.2155	18.209	13.7631	12.4798	18.5503	12.9629	18.0414	18.2584	13.1334
Abcc3	31.0928	0.151448	0.246208	2.73932	0.740098	0.999981	33.7687	28.8791	25.2248	23.232	27.7093	37.3569	34.8121	24.4526	33.1274	37.8868	24.3445	42.3187
Abcc4	3.01957	-0.761731	0.80247	3.88437	0.566182	0.999981	4.8241	4.12559	2.10206	4.00552	1.58339	3.9323	2.62733	1.68639	8.64193	2.7062	0	0
Abcc5	12.9839	0.10396	0.381374	1.69122	0.890003	0.999981	9.6482	14.027	5.6055	15.221	15.8339	15.7292	12.4798	16.8639	15.8435	15.3352	6.08613	13.1334
Abcd3	17.1634	0.509143	0.327355	2.31253	0.804425	0.999981	13.6683	14.8521	21.0206	11.2155	14.2505	7.8646	13.7935	14.3343	23.0452	19.8455	24.3445	27.7261
Abcf1	22.7296	-0.0839429	0.277589	1.40914	0.923311	0.999981	21.7085	19.8028	21.0206	29.6409	24.5425	23.5938	23.646	17.7071	21.6048	19.8455	29.2134	20.4297
Abcf2	17.57	-0.126372	0.323121	3.06965	0.689249	0.999981	24.9245	17.3275	10.5103	28.0387	15.8339	13.7631	15.764	19.3935	12.9629	15.3352	19.4756	17.5112
Abcf3	10.8768	-0.133544	0.384352	0.896897	0.970446	0.999981	9.6482	13.2019	11.9117	12.0166	7.91694	13.7631	10.5093	10.1183	8.64193	9.92275	9.7378	13.1334
Abhd10	4.30302	1.19312	0.638545	0.8007	0.976989	0.999981	2.41205	2.47535	1.40138	2.40331	4.75016	1.96615	5.9115	7.58875	4.32097	7.21654	2.43445	8.7556
Abhd11	8.07194	-0.132678	0.451152	0.99017	0.963355	0.999981	8.04017	11.5516	11.9117	7.20994	5.54186	5.89845	6.56833	6.74555	7.20161	7.21654	7.30335	11.6741
Abhd12	111.554	0.0664187	0.148533	4.4515	0.486399	0.999981	109.346	99.8392	95.9942	106.547	119.546	117.969	105.75	100.34	100.823	110.954	116.854	154.682
Abhd13	8.46846	-0.386982	0.443815	0.681845	0.98395	0.999981	12.0603	11.5516	8.40825	6.40884	7.91694	11.7969	7.22516	7.58875	10.0823	8.11861	6.08613	4.3778
Abhd14b	6.61379	-0.131199	0.499387	0.127978	0.999702	0.999981	5.62812	9.90141	7.00688	5.60773	5.54186	7.8646	6.56833	3.37278	7.20161	6.31447	8.52058	5.83707
Abhd16a	16.651	-0.184725	0.322054	4.26289	0.51222	0.999981	16.0803	19.8028	21.0206	12.8177	22.1674	13.7631	10.5093	20.2367	12.9629	14.4331	24.3445	11.6741
Abhd17a	30.1454	0.0530839	0.270076	1.91353	0.860976	0.999981	30.5526	31.3545	35.7351	26.4365	23.7508	27.5261	23.646	22.7662	28.8064	40.5931	48.689	21.889
Abhd17b	6.49219	-0.153449	0.496409	2.02817	0.845234	0.999981	8.04017	4.9507	4.90482	5.60773	9.50033	7.8646	7.22516	6.74555	5.76129	2.7062	7.30335	7.29633
Abhd17c	22.9461	-0.104104	0.287917	7.91869	0.160774	0.999981	15.2763	35.48	28.7282	24.8342	24.5425	13.7631	21.6755	29.5118	33.1274	21.6496	12.1723	14.5927
Abhd2	13.9385	0.0623174	0.359174	1.31418	0.933466	0.999981	13.6683	13.2019	18.2179	11.2155	12.6671	11.7969	15.764	8.43194	11.5226	22.5517	12.1723	16.0519
Abhd4	25.5	0.132099	0.263846	3.40231	0.638219	0.999981	26.5326	21.453	20.3199	22.4309	28.501	25.56	27.587	16.0207	24.4855	28.8662	36.5168	27.7261
Abhd5	20.4866	0.332678	0.291542	1.53954	0.908462	0.999981	19.2964	21.453	20.3199	12.0166	19.0007	17.6954	23.646	22.7662	23.0452	22.5517	27.9962	16.0519
Abhd8	8.15341	0.00158011	0.483336	1.24731	0.940258	0.999981	7.23615	8.25117	11.211	8.01105	4.75016	7.8646	7.882	7.58875	4.32097	5.41241	19.4756	5.83707
Abi1	53.8855	-0.159395	0.217994	1.12209	0.95213	0.999981	60.3013	57.7582	52.5516	49.6685	71.2524	45.2215	33.4985	46.3757	66.2548	58.6344	43.8201	61.2892
Abi2	6.00132	0.403774	0.512971	2.82028	0.727669	0.999981	5.62812	4.9507	5.6055	3.20442	7.12524	3.9323	7.882	6.74555	7.20161	2.7062	9.7378	7.29633
Abi3	3.54362	-0.492023	0.700291	7.65441	0.176339	0.999981	3.21607	0.825117	4.20413	4.80663	7.12524	3.9323	3.28416	0	4.32097	1.80414	6.08613	2.91853
Abl1	14.012	-0.313401	0.343892	1.38538	0.925906	0.999981	16.8844	12.3768	14.0138	15.221	15.8339	17.6954	10.5093	11.8047	11.5226	9.92275	13.3895	18.9705
Abl2	6.12661	-0.166127	0.525446	5.84653	0.32144	0.999981	6.43213	4.9507	6.30619	9.61326	8.70863	1.96615	5.25466	3.37278	11.5226	5.41241	8.52058	1.45927
Abr	60.8448	-0.150445	0.187031	8.32156	0.139382	0.999981	65.1254	48.6819	78.477	51.2707	64.1272	76.6799	56.4876	38.7869	83.5387	55.0261	60.8613	51.0743
Abracl	30.8216	-0.159623	0.245302	3.92064	0.560898	0.999981	36.1808	46.2066	28.7282	28.0387	25.3342	31.4584	28.2438	35.4142	34.5677	30.6703	23.1273	21.889
Abraxas2	16.1635	-0.051302	0.327616	1.87688	0.865905	0.999981	13.6683	21.453	17.5172	16.8232	15.0422	11.7969	10.5093	16.0207	17.2839	14.4331	14.6067	24.8075
Abt1	5.80614	-0.0229307	0.531465	3.58987	0.609834	0.999981	6.43213	5.77582	7.00688	4.00552	3.16678	7.8646	5.9115	2.52958	11.5226	4.51034	3.65168	7.29633
Abtb1	10.8254	0.299241	0.396139	4.64541	0.460667	0.999981	8.04017	5.77582	8.40825	11.2155	12.6671	11.7969	11.1662	6.74555	14.4032	9.02068	21.9101	8.7556
AC109196.1	3.81246	0.228965	0.651656	2.32779	0.802176	0.999981	4.02008	4.9507	4.20413	2.40331	1.58339	3.9323	8.53883	3.37278	2.88064	4.51034	2.43445	2.91853
AC120557.1	15.2901	0.0712397	0.340987	2.40457	0.790794	0.999981	18.4924	14.8521	11.211	14.4199	19.0007	9.83075	13.7935	12.6479	10.0823	24.3558	15.8239	18.9705
AC168314.1	12.9157	0.248848	0.370487	0.983681	0.963871	0.999981	12.8643	16.5023	16.1158	11.2155	7.91694	5.89845	15.764	10.1183	14.4032	13.531	14.6067	16.0519
Acaa1a	31.499	0.108681	0.242776	3.59365	0.609267	0.999981	29.7486	27.2289	23.8234	43.2597	26.9176	31.4584	27.587	30.355	28.8064	39.691	41.3857	27.7261
Acaa2	18.1216	0.064404	0.309098	4.3086	0.505893	0.999981	12.0603	17.3275	15.4151	19.2265	22.1674	17.6954	13.7935	16.0207	14.4032	15.3352	21.9101	32.1039
Acad11	5.48926	0.0988445	0.551387	4.64776	0.46036	0.999981	4.8241	2.47535	2.10206	8.01105	6.33355	7.8646	3.941	2.52958	5.76129	4.51034	7.30335	10.2149
Acad12	5.98749	0.0373616	0.527633	0.800122	0.977026	0.999981	5.62812	7.42605	3.50344	5.60773	6.33355	5.89845	7.22516	2.52958	7.20161	5.41241	4.8689	10.2149
Acad8	10.8566	0.487046	0.425932	4.14089	0.529315	0.999981	12.8643	2.47535	4.20413	15.221	11.8754	9.83075	12.4798	13.4911	8.64193	9.02068	17.0412	13.1334
Acad9	4.93903	0.52036	0.580923	3.25634	0.660533	0.999981	4.02008	4.9507	3.50344	6.40884	5.54186	0	9.19566	7.58875	5.76129	4.51034	4.8689	2.91853
Acadl	24.9089	0.331858	0.277883	1.24674	0.940316	0.999981	23.3165	18.1526	22.422	31.2431	22.9591	13.7631	28.9007	34.571	20.1645	25.2579	30.4306	27.7261
Acadm	14.223	0.21686	0.346358	4.60648	0.465764	0.999981	10.4522	13.2019	14.7144	10.4144	15.8339	11.7969	9.85249	14.3343	24.4855	8.11861	17.0412	20.4297
Acads	14.4443	-0.0412891	0.351259	1.4172	0.922422	0.999981	12.8643	12.3768	12.6124	19.2265	15.0422	15.7292	11.823	15.1775	23.0452	13.531	14.6067	7.29633
Acadsb	7.01937	0.575401	0.508945	1.34242	0.930507	0.999981	8.04017	4.9507	4.20413	7.20994	3.16678	5.89845	6.56833	5.90236	12.9629	9.02068	13.3895	2.91853
Acadvl	16.1167	-0.203092	0.324718	2.11308	0.833287	0.999981	16.8844	12.3768	18.2179	18.4254	15.8339	21.6277	13.1367	10.1183	15.8435	14.4331	21.9101	14.5927
Acap2	19.4786	0.0410629	0.304112	1.45137	0.918613	0.999981	21.7085	17.3275	15.4151	17.6243	21.3757	19.6615	11.823	18.5503	21.6048	18.0414	24.3445	26.2668
Acap3	5.75503	0.193433	0.533819	1.9802	0.851878	0.999981	4.02008	2.47535	7.00688	8.01105	4.75016	5.89845	4.59783	5.90236	2.88064	7.21654	6.08613	10.2149
Acat1	13.5203	0.293636	0.359689	4.09764	0.535445	0.999981	19.2964	14.8521	14.0138	9.61326	9.50033	5.89845	18.3913	16.0207	11.5226	20.7476	12.1723	10.2149
Acbd3	14.9148	0.275748	0.351191	4.68711	0.455245	0.999981	14.4723	16.5023	9.10894	7.20994	14.2505	17.6954	10.5093	11.8047	14.4032	15.3352	17.0412	30.6446
Acbd4	4.2914	0.297102	0.605047	1.79665	0.876505	0.999981	2.41205	2.47535	4.20413	4.80663	4.75016	3.9323	3.941	3.37278	2.88064	6.31447	3.65168	8.7556
Acbd5	15.7888	-0.344599	0.324794	1.73541	0.884409	0.999981	16.8844	15.6772	16.8165	12.8177	19.0007	25.56	11.823	13.4911	12.9629	13.531	13.3895	17.5112
Acbd6	19.2574	0.135614	0.300837	2.08556	0.837184	0.999981	19.2964	20.6279	19.6193	17.6243	15.8339	17.6954	23.646	21.923	21.6048	22.5517	21.9101	8.7556
Acd	7.72459	-0.327828	0.480825	1.13983	0.950518	0.999981	9.6482	6.60094	9.10894	10.4144	6.33355	7.8646	4.59783	9.27514	1.44032	7.21654	8.52058	11.6741
Acer3	21.4615	0.00652932	0.292899	7.98114	0.157278	0.999981	10.4522	13.2019	25.9255	31.2431	27.7093	21.6277	13.7935	18.5503	23.0452	18.9434	26.779	26.2668
Acin1	14.9688	0.058862	0.351974	2.5671	0.766358	0.999981	15.2763	13.2019	9.10894	25.6353	15.0422	9.83075	9.85249	18.5503	15.8435	14.4331	18.2584	14.5927
Acly	31.452	0.127303	0.240019	1.94625	0.856531	0.999981	32.1607	33.8298	33.633	31.2431	27.7093	21.6277	33.4985	35.4142	27.3661	40.5931	34.0823	26.2668
Aco1	12.7999	-0.0230796	0.367222	0.983449	0.96389	0.999981	19.2964	9.90141	15.4151	9.61326	11.8754	11.7969	13.1367	15.1775	10.0823	14.4331	9.7378	13.1334
Aco2	53.1374	0.112314	0.191021	1.65691	0.894284	0.999981	58.6932	48.6819	56.055	46.4641	45.1265	51.1199	61.7423	56.494	53.2919	47.8096	52.3407	59.8299
Acot13	24.2254	0.396219	0.276641	1.77704	0.879054	0.999981	20.9044	18.1526	20.3199	16.0221	20.584	31.4584	31.528	32.8846	17.2839	27.062	26.779	27.7261
Acot2	5.34197	0.522771	0.568027	3.40419	0.637932	0.999981	2.41205	4.9507	5.6055	3.20442	3.95847	5.89845	4.59783	6.74555	14.4032	7.21654	3.65168	1.45927
Acot7	20.0847	-0.314284	0.293735	1.62286	0.898471	0.999981	26.5326	23.1033	23.1227	18.4254	19.7923	21.6277	20.3618	16.0207	15.8435	12.6289	23.1273	20.4297
Acot8	10.3984	-0.193588	0.398803	2.40469	0.790775	0.999981	6.43213	7.42605	11.211	12.8177	12.6671	17.6954	7.22516	9.27514	10.0823	9.02068	12.1723	8.7556
Acot9	15.0666	0.680555	0.339015	0.932296	0.96784	0.999981	8.04017	11.5516	16.1158	10.4144	10.292	13.7631	18.3913	15.1775	15.8435	19.8455	19.4756	21.889
Acox1	22.1463	-0.0206529	0.284545	4.00756	0.548329	0.999981	32.9647	23.9284	21.0206	12.8177	21.3757	21.6277	24.9597	18.5503	24.4855	18.0414	18.2584	27.7261
Acox3	14.7527	0.113241	0.337358	8.88332	0.11381	0.999981	10.4522	13.2019	7.70757	13.6188	23.7508	15.7292	11.1662	16.0207	8.64193	11.7269	23.1273	21.889
Acp1	26.3923	0.00678829	0.26103	3.53547	0.618028	0.999981	20.9044	28.054	37.8371	24.8342	25.3342	21.6277	22.9892	33.7278	28.8064	29.7682	19.4756	23.3483
Acp2	44.1845	-0.117018	0.217526	5.19813	0.392181	0.999981	43.4169	35.48	32.2316	51.2707	55.4186	57.0184	30.8711	41.3165	41.7693	42.3972	37.734	61.2892
Acp6	5.74633	-0.244743	0.581464	2.2437	0.814499	0.999981	7.23615	3.30047	5.6055	4.00552	6.33355	9.83075	1.31367	3.37278	8.64193	8.11861	9.7378	1.45927
Acsf3	2.92601	1.27033	0.828058	2.56017	0.767407	0.999981	0.804017	4.12559	1.40138	0	4.75016	0	3.28416	2.52958	4.32097	2.7062	2.43445	8.7556
Acsl1	11.4242	-0.278512	0.391134	2.27861	0.809403	0.999981	8.04017	15.6772	14.7144	14.4199	15.0422	7.8646	13.7935	13.4911	10.0823	10.8248	7.30335	5.83707
Acsl3	4.03209	0.126507	0.66304	3.23758	0.663411	0.999981	8.04017	3.30047	2.80275	2.40331	1.58339	5.89845	6.56833	6.74555	2.88064	4.51034	3.65168	0
Acsl4	13.4395	-0.676392	0.374711	1.55888	0.906176	0.999981	9.6482	18.1526	15.4151	21.6298	19.7923	13.7631	11.823	8.43194	5.76129	10.8248	8.52058	17.5112
Acsl5	30.0842	0.0498776	0.249297	1.44648	0.919162	0.999981	34.5727	28.8791	35.0344	29.6409	25.3342	23.5938	32.8416	39.6301	23.0452	32.4744	26.779	29.1853
Acss1	4.40976	-1.04175	0.655677	2.43057	0.786913	0.999981	10.4522	4.12559	4.20413	4.00552	7.91694	3.9323	3.28416	2.52958	0	5.41241	1.21723	5.83707
Actl6a	11.1154	-0.0132206	0.388049	5.52428	0.35529	0.999981	19.2964	12.3768	10.5103	8.01105	13.4588	3.9323	12.4798	12.6479	11.5226	9.92275	13.3895	5.83707
Actn1	54.397	-0.120785	0.204118	1.80205	0.875801	0.999981	76.3816	57.7582	49.0482	40.8563	56.2103	60.9507	50.5761	42.1597	56.1726	54.1241	55.9924	52.5336
Actn4	51.5928	-0.0239537	0.206317	3.55673	0.614821	0.999981	51.4571	64.3591	55.3543	47.2652	45.9182	45.2215	53.2035	56.494	46.0903	64.9489	30.4306	58.3707
Actr10	21.7995	0.0188553	0.288186	3.06561	0.689872	0.999981	20.9044	19.8028	28.7282	20.8287	21.3757	17.6954	15.764	29.5118	25.9258	27.9641	17.0412	16.0519
Actr1a	52.2555	-0.282051	0.197682	4.13494	0.530157	0.999981	57.0852	61.0587	66.5654	50.4696	44.3349	64.883	49.9193	59.8668	47.5306	33.3765	43.8201	48.1558
Actr1b	26.4332	0.181295	0.267552	5.42038	0.366756	0.999981	24.9245	26.4037	33.633	19.2265	18.209	27.5261	32.1848	38.7869	33.1274	28.8662	18.2584	16.0519
Actr2	162.912	-0.0535556	0.142876	3.76418	0.583843	0.999981	148.743	146.046	164.662	216.298	178.923	141.563	149.758	175.384	133.95	177.707	149.719	172.193
Actr5	3.38248	0.628651	0.723713	5.30604	0.379683	0.999981	4.02008	3.30047	1.40138	1.60221	0.791694	3.9323	1.9705	6.74555	1.44032	5.41241	1.21723	8.7556
Actr6	4.47591	-0.262208	0.617872	2.5576	0.767796	0.999981	4.8241	5.77582	2.80275	3.20442	5.54186	5.89845	0.656833	7.58875	4.32097	3.60827	3.65168	5.83707
Actr8	8.85805	0.216518	0.430678	0.709344	0.982452	0.999981	9.6482	6.60094	10.5103	6.40884	6.33355	9.83075	7.22516	7.58875	10.0823	9.92275	13.3895	8.7556
Acvr1	3.96729	-0.593799	0.690525	8.32607	0.139157	0.999981	6.43213	5.77582	6.30619	2.40331	7.12524	0	4.59783	5.05916	7.20161	2.7062	0	0
Acvr1b	5.26306	0.145497	0.579197	9.0222	0.108182	0.999981	3.21607	0.825117	11.211	4.80663	3.95847	5.89845	5.25466	2.52958	8.64193	2.7062	2.43445	11.6741
Acvrl1	10.3082	-0.0700055	0.419534	2.51897	0.773635	0.999981	8.84418	11.5516	7.00688	9.61326	13.4588	9.83075	7.882	6.74555	14.4032	5.41241	8.52058	20.4297
Acyp1	7.37989	0.521802	0.467762	0.449309	0.993862	0.999981	7.23615	6.60094	5.6055	5.60773	3.95847	7.8646	9.19566	7.58875	11.5226	9.02068	8.52058	5.83707
Ada	18.3739	0.541651	0.320588	1.45082	0.918674	0.999981	18.4924	15.6772	8.40825	16.0221	17.4173	11.7969	18.3913	18.5503	23.0452	16.2372	24.3445	32.1039
Adam10	47.3105	-0.0881665	0.204557	3.4503	0.63092	0.999981	57.0852	55.2828	44.844	45.663	34.8345	57.0184	55.8308	46.3757	46.0903	47.8096	38.9512	37.9409
Adam15	74.4027	-0.0894666	0.173862	6.52862	0.258123	0.999981	88.4418	83.3368	79.1777	76.906	63.3355	68.8153	98.5249	80.1034	59.0532	80.284	60.8613	53.9929
Adam17	34.3962	-0.0332058	0.23577	4.91433	0.426425	0.999981	23.3165	34.6549	37.8371	31.2431	38.793	41.2892	29.5575	25.2958	37.4484	31.5724	29.2134	52.5336
Adam9	31.9865	-0.611445	0.268152	0.958764	0.965823	0.999981	38.5928	29.7042	30.1296	36.0497	40.3764	58.9845	23.646	26.9822	38.8887	19.8455	23.1273	17.5112
Adamtsl5	15.2277	0.604567	0.341776	1.17931	0.946847	0.999981	14.4723	8.25117	10.5103	12.8177	14.2505	11.7969	15.764	16.8639	21.6048	25.2579	12.1723	18.9705
Adap1	20.6151	0.0371864	0.303342	2.0586	0.840978	0.999981	20.1004	22.2782	21.0206	27.2376	18.209	11.7969	22.3323	13.4911	27.3661	18.0414	27.9962	17.5112
Adck1	6.49104	-0.430363	0.504336	1.61579	0.899334	0.999981	10.4522	8.25117	4.90482	7.20994	6.33355	7.8646	6.56833	7.58875	5.76129	5.41241	6.08613	1.45927
Adck2	5.0048	-0.515136	0.570621	4.4082	0.492259	0.999981	6.43213	3.30047	4.20413	5.60773	9.50033	5.89845	4.59783	1.68639	2.88064	4.51034	8.52058	2.91853
Add1	26.4083	-0.0723028	0.260512	0.719067	0.981906	0.999981	24.1205	23.9284	35.0344	23.232	27.7093	29.4923	25.6165	29.5118	23.0452	24.3558	23.1273	27.7261
Add3	5.15612	0.267452	0.559933	0.508668	0.991802	0.999981	3.21607	4.9507	4.90482	4.80663	4.75016	5.89845	7.882	6.74555	5.76129	5.41241	6.08613	1.45927
Adgre1	165.666	-0.208846	0.142698	4.83472	0.436383	0.999981	184.12	185.651	138.736	180.249	185.256	184.818	124.141	144.186	139.711	139.821	195.973	185.327
Adgre5	21.5087	0.496532	0.286586	4.36833	0.497692	0.999981	13.6683	16.5023	16.8165	12.8177	21.3757	27.5261	23.646	20.2367	27.3661	18.0414	35.2995	24.8075
Adgrl2	5.70617	0.505445	0.563773	3.61011	0.606796	0.999981	7.23615	8.25117	4.20413	4.00552	3.95847	0	7.22516	4.21597	14.4032	4.51034	6.08613	4.3778
Adh5	35.0957	0.183242	0.232997	4.98574	0.417623	0.999981	31.3567	37.9554	39.9392	30.442	32.4594	25.56	49.2625	44.6893	38.8887	36.0827	34.0823	20.4297
Adi1	14.7515	0.409175	0.346866	3.5326	0.61846	0.999981	16.0803	9.07629	14.0138	10.4144	13.4588	11.7969	21.0187	16.8639	10.0823	9.92275	26.779	17.5112
Adipor1	136.363	0.0385147	0.139759	8.58229	0.126931	0.999981	126.231	125.418	114.212	118.563	159.922	161.224	122.171	109.615	129.629	132.604	170.412	166.356
Adipor2	19.7902	-0.149684	0.306145	1.27476	0.937507	0.999981	14.4723	15.6772	23.1227	25.6353	22.9591	23.5938	17.0777	24.4526	12.9629	17.1393	17.0412	23.3483
Adk	7.62766	0.508166	0.471397	5.51691	0.356096	0.999981	4.8241	9.90141	8.40825	7.20994	3.95847	3.9323	11.823	11.8047	10.0823	10.8248	7.30335	1.45927
Adnp	8.69117	-0.307884	0.461425	3.00649	0.698985	0.999981	8.84418	3.30047	11.9117	8.01105	11.8754	13.7631	5.9115	10.1183	4.32097	3.60827	10.955	11.6741
Adnp2	4.39595	-0.466708	0.619653	1.96346	0.854178	0.999981	5.62812	4.9507	6.30619	2.40331	5.54186	5.89845	5.25466	2.52958	5.76129	3.60827	4.8689	0
Ado	10.851	0.339768	0.396685	1.96649	0.853763	0.999981	7.23615	12.3768	6.30619	10.4144	13.4588	7.8646	8.53883	13.4911	17.2839	13.531	10.955	8.7556
Adpgk	7.78807	0.0543342	0.481697	2.321	0.803177	0.999981	9.6482	4.9507	9.80963	4.80663	7.12524	9.83075	9.85249	13.4911	10.0823	6.31447	6.08613	1.45927
Adprh	28.7475	-0.226158	0.257098	6.57325	0.254361	0.999981	21.7085	30.5293	25.2248	26.4365	38.793	43.2553	22.9892	16.0207	20.1645	29.7682	36.5168	33.5631
Adprm	5.74568	-0.837844	0.586941	2.38918	0.793084	0.999981	5.62812	9.90141	7.70757	6.40884	8.70863	1.96615	1.9705	2.52958	4.32097	1.80414	4.8689	13.1334
Adprs	11.8953	0.419622	0.404401	1.51279	0.91159	0.999981	11.2562	14.027	9.10894	7.20994	3.95847	17.6954	16.4208	10.9615	8.64193	13.531	18.2584	11.6741
Adrb2	5.84232	-0.0255686	0.555606	1.28747	0.936216	0.999981	9.6482	8.25117	7.00688	4.00552	2.37508	3.9323	5.9115	3.37278	5.76129	4.51034	10.955	4.3778
Adrm1	34.7832	-0.0883384	0.234348	1.14684	0.949874	0.999981	39.3968	34.6549	31.531	40.8563	41.1681	25.56	26.9302	37.1005	30.2468	34.2786	37.734	37.9409
Adsl	12.2779	0.115195	0.368662	2.21666	0.818426	0.999981	12.0603	13.2019	16.8165	8.81215	11.0837	7.8646	11.1662	10.9615	18.7242	13.531	8.52058	14.5927
Adss	15.8602	-0.00130914	0.326843	7.41574	0.191511	0.999981	21.7085	18.9777	16.1158	18.4254	9.50033	9.83075	17.7345	21.923	17.2839	19.8455	7.30335	11.6741
Aebp1	3.67815	-2.23182	0.807189	2.91828	0.712584	0.999981	6.43213	5.77582	4.90482	4.80663	5.54186	5.89845	0	0.843194	2.88064	0	1.21723	5.83707
Aebp2	13.5692	0.0464301	0.356458	0.342638	0.996763	0.999981	12.0603	15.6772	11.9117	8.81215	15.0422	17.6954	15.1072	10.9615	17.2839	14.4331	12.1723	11.6741
Aen	14.1222	-0.137699	0.349646	1.73198	0.884847	0.999981	16.8844	18.1526	15.4151	13.6188	15.0422	7.8646	13.7935	17.7071	14.4032	8.11861	10.955	17.5112
Afdn	10.2147	0.344302	0.408896	1.59497	0.901857	0.999981	7.23615	9.07629	9.80963	12.8177	8.70863	5.89845	17.0777	10.9615	12.9629	11.7269	6.08613	10.2149
Aff1	22.7131	0.0910127	0.294651	4.82219	0.437964	0.999981	15.2763	13.2019	26.6261	37.6519	25.3342	15.7292	21.6755	18.5503	20.1645	21.6496	30.4306	26.2668
Aff4	15.4309	-0.0892826	0.348	2.02938	0.845065	0.999981	20.1004	18.9777	16.1158	13.6188	15.8339	7.8646	12.4798	14.3343	18.7242	7.21654	19.4756	20.4297
Afg1l	4.15199	0.474662	0.674144	1.61582	0.89933	0.999981	4.02008	0	4.90482	2.40331	3.16678	7.8646	1.9705	5.90236	5.76129	3.60827	7.30335	2.91853
Afg3l1	15.71	0.362986	0.327671	2.01817	0.846625	0.999981	12.0603	16.5023	16.8165	17.6243	9.50033	9.83075	17.7345	19.3935	21.6048	15.3352	14.6067	17.5112
Afp	7.02441	0.725862	0.502806	4.60698	0.465698	0.999981	4.8241	4.9507	9.10894	4.00552	4.75016	3.9323	10.5093	5.05916	11.5226	14.4331	9.7378	1.45927
Aga	16.1738	0.0555531	0.324383	1.73368	0.88463	0.999981	16.0803	14.027	15.4151	17.6243	16.6256	15.7292	24.3028	16.0207	12.9629	18.0414	17.0412	10.2149
Agap1	7.27169	-0.161745	0.474862	2.93884	0.709415	0.999981	10.4522	4.12559	10.5103	7.20994	10.292	3.9323	8.53883	7.58875	7.20161	4.51034	8.52058	4.3778
Agap3	19.4824	-0.0243106	0.302446	1.83807	0.871066	0.999981	16.8844	18.1526	26.6261	18.4254	14.2505	25.56	23.646	16.8639	23.0452	18.9434	18.2584	13.1334
Agfg1	20.8398	-0.0971332	0.297009	6.57037	0.254602	0.999981	23.3165	32.1796	19.6193	21.6298	16.6256	13.7631	16.4208	30.355	30.2468	16.2372	12.1723	17.5112
Agfg2	7.19563	-0.405056	0.476955	0.378738	0.995895	0.999981	8.84418	6.60094	9.10894	8.01105	7.12524	9.83075	7.882	8.43194	4.32097	4.51034	7.30335	4.3778
Aggf1	12.6026	0.182157	0.387554	5.29446	0.381011	0.999981	7.23615	14.027	18.9186	16.0221	10.292	3.9323	6.56833	18.5503	8.64193	14.4331	19.4756	13.1334
Agk	3.46681	0.0640513	0.689797	4.25756	0.51296	0.999981	3.21607	3.30047	5.6055	1.60221	3.95847	1.96615	1.31367	6.74555	5.76129	1.80414	4.8689	1.45927
Agl	4.71878	0.16924	0.622701	2.72832	0.741784	0.999981	3.21607	3.30047	3.50344	7.20994	3.95847	3.9323	5.9115	3.37278	14.4032	2.7062	3.65168	1.45927
Ago1	7.2798	0.481478	0.481557	2.54646	0.769482	0.999981	6.43213	6.60094	4.20413	4.80663	6.33355	7.8646	11.823	9.27514	8.64193	3.60827	13.3895	4.3778
Ago2	14.8881	0.417407	0.340803	2.7126	0.744191	0.999981	9.6482	14.8521	16.1158	10.4144	13.4588	11.7969	17.0777	27.8254	12.9629	12.6289	15.8239	16.0519
Ago3	4.3917	0.169717	0.618819	2.73542	0.740696	0.999981	4.02008	6.60094	3.50344	3.20442	3.95847	1.96615	2.62733	8.43194	1.44032	7.21654	2.43445	7.29633
Ago4	3.03275	0.501099	0.728788	2.95266	0.707284	0.999981	3.21607	0.825117	1.40138	3.20442	2.37508	3.9323	1.9705	1.68639	2.88064	5.41241	3.65168	5.83707
Agpat1	33.3516	0.0784707	0.246479	1.27115	0.937872	0.999981	34.5727	33.0047	32.2316	26.4365	34.0428	31.4584	32.8416	23.6094	33.1274	44.2013	27.9962	46.6965
Agpat2	18.9439	-0.030486	0.321155	5.3522	0.374425	0.999981	18.4924	9.07629	21.7213	20.0276	22.9591	19.6615	12.4798	16.0207	12.9629	18.9434	17.0412	37.9409
Agpat3	26.3896	0.173902	0.259573	1.0922	0.954792	0.999981	24.1205	27.2289	20.3199	28.8398	23.7508	23.5938	31.528	29.5118	27.3661	26.16	20.6928	33.5631
Agpat4	5.44518	0.129592	0.534557	2.63848	0.75551	0.999981	3.21607	4.12559	5.6055	7.20994	7.12524	3.9323	3.28416	5.05916	7.20161	8.11861	6.08613	4.3778
Agpat5	14.9328	0.233212	0.3444	1.58782	0.902719	0.999981	15.2763	10.7265	12.6124	16.8232	10.292	17.6954	20.3618	21.923	11.5226	17.1393	14.6067	10.2149
Agps	17.1116	0.173955	0.323308	3.00289	0.699541	0.999981	20.1004	13.2019	25.2248	16.0221	12.6671	9.83075	19.0482	24.4526	18.7242	14.4331	17.0412	14.5927
Agrn	3.41481	-1.0632	0.724066	4.51521	0.477851	0.999981	3.21607	4.12559	3.50344	4.80663	8.70863	1.96615	0.656833	0.843194	1.44032	2.7062	6.08613	2.91853
Agtpbp1	3.59768	-0.628802	0.744081	0.534141	0.99082	0.999981	4.8241	6.60094	6.30619	1.60221	3.95847	1.96615	3.28416	0.843194	0	7.21654	3.65168	2.91853
Agtrap	15.5283	0.211399	0.327254	1.56193	0.905814	0.999981	12.0603	16.5023	14.0138	15.221	15.0422	13.7631	15.764	18.5503	15.8435	16.2372	23.1273	10.2149
Ahctf1	7.6122	0.0179612	0.462972	3.20177	0.668911	0.999981	5.62812	13.2019	5.6055	4.80663	11.0837	5.89845	7.22516	7.58875	7.20161	6.31447	10.955	5.83707
Ahcyl1	19.9377	-0.0284951	0.29922	2.5662	0.766494	0.999981	21.7085	26.4037	27.3268	15.221	17.4173	13.7631	23.646	21.0799	17.2839	22.5517	18.2584	14.5927
Ahcyl2	11.4609	0.346737	0.384149	1.14701	0.949859	0.999981	14.4723	10.7265	10.5103	5.60773	9.50033	9.83075	11.1662	13.4911	10.0823	11.7269	15.8239	14.5927
Ahnak	145.175	0.215683	0.153517	5.1617	0.396466	0.999981	143.115	91.588	119.117	173.84	136.963	149.427	164.208	146.716	165.637	171.393	161.891	118.201
Ahnak2	6.43784	0.0439648	0.509469	3.92681	0.560001	0.999981	4.8241	3.30047	4.20413	6.40884	6.33355	13.7631	2.62733	5.90236	7.20161	5.41241	8.52058	8.7556
Ahsa2	6.10192	-0.612129	0.525997	1.97688	0.852334	0.999981	7.23615	7.42605	4.20413	6.40884	11.0837	7.8646	3.28416	7.58875	2.88064	7.21654	3.65168	4.3778
AI413582	48.0684	0.260419	0.199924	1.23847	0.941134	0.999981	41.8089	40.4307	40.6399	42.4585	43.5432	55.0522	57.8013	46.3757	46.0903	51.4179	57.2096	53.9929
AI467606	11.3631	-0.510918	0.386025	2.39086	0.792835	0.999981	14.4723	14.8521	8.40825	12.0166	18.209	11.7969	6.56833	9.27514	7.20161	12.6289	12.1723	8.7556
AI506816	13.6308	0.611099	0.366678	7.67847	0.174869	0.999981	18.4924	17.3275	11.211	12.0166	4.75016	1.96615	20.3618	18.5503	14.4032	18.9434	10.955	14.5927
AI597479	3.57138	-0.233921	0.669476	1.85322	0.869059	0.999981	5.62812	3.30047	2.10206	3.20442	3.16678	5.89845	4.59783	2.52958	2.88064	5.41241	1.21723	2.91853
AI662270	20.8661	-0.0512336	0.297224	4.54693	0.473629	0.999981	23.3165	28.054	22.422	26.4365	11.0837	15.7292	15.764	20.2367	30.2468	22.5517	17.0412	17.5112
AI837181	17.0896	-0.163788	0.316855	7.38218	0.193733	0.999981	17.6884	8.25117	19.6193	16.8232	22.1674	23.5938	14.4503	10.1183	14.4032	11.7269	24.3445	21.889
AI987944	3.73353	-0.444328	0.705858	1.98194	0.851639	0.999981	3.21607	0.825117	3.50344	4.00552	7.12524	7.8646	3.941	4.21597	0	4.51034	1.21723	4.3778
Aifm1	10.0974	-0.330571	0.426865	2.47141	0.780794	0.999981	8.84418	11.5516	10.5103	6.40884	16.6256	13.7631	9.85249	9.27514	1.44032	11.7269	10.955	10.2149
Aifm2	11.2119	-0.149687	0.384158	1.94554	0.856628	0.999981	13.6683	16.5023	13.3131	12.8177	10.292	3.9323	10.5093	12.6479	10.0823	10.8248	9.7378	10.2149
Aig1	11.9239	0.780636	0.400881	6.94233	0.224965	0.999981	11.2562	12.3768	13.3131	12.0166	4.75016	0	15.764	13.4911	14.4032	18.9434	19.4756	7.29633
Aim2	5.99296	0.0542879	0.530879	0.92073	0.968703	0.999981	4.8241	8.25117	2.80275	4.00552	6.33355	9.83075	5.9115	3.37278	7.20161	7.21654	4.8689	7.29633
Aimp2	8.37645	0.748455	0.444207	1.31552	0.933327	0.999981	6.43213	4.12559	7.70757	5.60773	4.75016	9.83075	8.53883	10.1183	14.4032	11.7269	8.52058	8.7556
Aip	27.0814	-0.0766952	0.254824	1.12197	0.95214	0.999981	23.3165	24.7535	30.1296	32.8453	30.0844	25.56	27.587	21.923	23.0452	29.7682	26.779	29.1853
Ak1	8.56238	-0.475297	0.438728	0.944616	0.966908	0.999981	11.2562	10.7265	9.10894	12.0166	10.292	5.89845	7.882	9.27514	8.64193	4.51034	7.30335	5.83707
Ak2	16.8771	0.308991	0.327845	8.25999	0.142477	0.999981	16.0803	18.1526	11.9117	10.4144	16.6256	15.7292	26.9302	27.8254	14.4032	7.21654	25.5617	11.6741
Ak3	14.3301	0.348906	0.339787	0.657487	0.98522	0.999981	12.8643	9.90141	11.9117	12.0166	13.4588	15.7292	15.1072	15.1775	21.6048	13.531	14.6067	16.0519
Ak6	22.7769	0.40381	0.280732	3.58237	0.610963	0.999981	25.7285	23.1033	15.4151	21.6298	15.8339	15.7292	25.6165	35.4142	30.2468	26.16	19.4756	18.9705
Ak8	4.19371	0.0673862	0.626623	0.795862	0.977297	0.999981	5.62812	2.47535	4.20413	3.20442	3.16678	5.89845	3.941	8.43194	2.88064	2.7062	4.8689	2.91853
Akap1	4.71217	0.0275389	0.575738	0.0826457	0.999899	0.999981	5.62812	4.12559	5.6055	3.20442	5.54186	3.9323	3.941	5.90236	4.32097	6.31447	3.65168	4.3778
Akap10	9.73349	0.206486	0.419985	3.08201	0.687344	0.999981	7.23615	9.07629	14.7144	4.00552	12.6671	7.8646	12.4798	9.27514	14.4032	9.02068	7.30335	8.7556
Akap11	6.37161	-0.0744187	0.516547	0.62023	0.987058	0.999981	5.62812	7.42605	7.00688	5.60773	3.95847	9.83075	6.56833	2.52958	7.20161	9.02068	7.30335	4.3778
Akap13	17.7913	-0.539424	0.345707	1.77305	0.879571	0.999981	17.6884	10.7265	14.7144	28.0387	24.5425	33.4246	12.4798	19.3935	15.8435	13.531	8.52058	14.5927
Akap7	3.0559	-0.0496454	0.765116	4.12181	0.532016	0.999981	6.43213	0.825117	0	4.00552	3.16678	5.89845	2.62733	4.21597	1.44032	2.7062	2.43445	2.91853
Akap8	9.98064	-0.143967	0.410913	0.399256	0.99535	0.999981	8.84418	11.5516	11.9117	12.8177	7.91694	9.83075	12.4798	6.74555	10.0823	8.11861	12.1723	7.29633
Akap9	4.04326	0.0832564	0.624962	0.698895	0.983029	0.999981	2.41205	4.9507	4.20413	3.20442	3.16678	5.89845	6.56833	3.37278	4.32097	3.60827	2.43445	4.3778
Akip1	21.0117	0.443884	0.2873	3.80927	0.57719	0.999981	15.2763	20.6279	21.0206	13.6188	14.2505	21.6277	26.2733	25.2958	24.4855	14.4331	23.1273	32.1039
Akirin2	20.4432	0.209043	0.292942	1.39441	0.924924	0.999981	19.2964	18.1526	17.5172	13.6188	17.4173	29.4923	17.7345	22.7662	23.0452	23.4538	19.4756	23.3483
Akna	8.3186	-0.235816	0.468449	2.90884	0.714037	0.999981	5.62812	7.42605	8.40825	12.0166	16.6256	3.9323	7.882	3.37278	10.0823	10.8248	4.8689	8.7556
Akr1a1	582.454	0.14705	0.108146	2.75719	0.737359	0.999981	482.41	518.999	563.353	598.425	598.521	554.454	618.08	589.393	534.359	589.952	709.642	631.862
Akr1b10	14.1662	-0.520556	0.365126	1.88292	0.865097	0.999981	16.8844	9.90141	16.1158	17.6243	12.6671	29.4923	10.5093	9.27514	12.9629	15.3352	13.3895	5.83707
Akr1b3	49.1044	-0.140159	0.205189	1.07139	0.956604	0.999981	49.045	41.2559	55.3543	54.4751	57.7936	53.0861	53.8603	48.9053	38.8887	51.4179	48.689	36.4817
Akr1b8	11.1698	0.498981	0.385175	4.38152	0.49589	0.999981	11.2562	9.90141	12.6124	8.81215	4.75016	7.8646	15.764	16.0207	17.2839	8.11861	8.52058	13.1334
Akr1c12	5.71122	-0.325074	0.540067	0.871515	0.972249	0.999981	5.62812	4.9507	4.20413	8.01105	7.91694	7.8646	7.22516	6.74555	4.32097	6.31447	2.43445	2.91853
Akr1c13	14.5774	0.140985	0.339685	2.142	0.829168	0.999981	16.8844	11.5516	14.0138	10.4144	11.0837	19.6615	13.1367	16.0207	20.1645	13.531	10.955	17.5112
Akr7a5	12.4896	0.0463815	0.383031	0.822424	0.975581	0.999981	12.0603	15.6772	11.9117	5.60773	11.0837	19.6615	15.1072	10.9615	10.0823	15.3352	12.1723	10.2149
Akt1	60.3361	-0.0196073	0.191119	5.71454	0.334994	0.999981	76.3816	58.5833	63.0619	36.8508	64.1272	68.8153	65.6833	74.2011	56.1726	48.7117	55.9924	55.4521
Akt1s1	20.1504	-0.105715	0.300115	3.82704	0.574577	0.999981	21.7085	14.027	21.7213	21.6298	22.9591	23.5938	19.705	14.3343	21.6048	22.5517	29.2134	8.7556
Akt2	21.5947	-0.167494	0.294945	0.426353	0.994573	0.999981	24.1205	23.1033	23.8234	15.221	25.3342	25.56	20.3618	18.5503	20.1645	26.16	13.3895	23.3483
Akt3	4.90709	0.0758218	0.63016	4.74385	0.447934	0.999981	6.43213	1.65023	4.90482	10.4144	1.58339	3.9323	4.59783	3.37278	12.9629	2.7062	4.8689	1.45927
Aktip	13.6974	0.374671	0.350805	1.8108	0.874656	0.999981	12.8643	9.90141	14.7144	12.8177	9.50033	11.7969	21.0187	13.4911	18.7242	10.8248	17.0412	11.6741
AL731706.1	3.425	0.542919	0.689804	0.902991	0.970005	0.999981	2.41205	0.825117	2.80275	4.00552	3.16678	3.9323	3.941	5.05916	1.44032	4.51034	6.08613	2.91853
Alad	6.13824	0.0446986	0.53124	2.09491	0.835863	0.999981	6.43213	9.90141	9.10894	6.40884	2.37508	1.96615	4.59783	5.90236	4.32097	9.02068	4.8689	8.7556
Alcam	88.7466	0.0990851	0.176307	3.17417	0.673154	0.999981	77.1856	87.4624	93.1915	104.945	81.5445	68.8153	107.064	123.106	72.0161	86.5985	82.7713	80.2597
Aldh16a1	8.78284	-0.110876	0.427061	1.04308	0.959016	0.999981	7.23615	9.90141	9.10894	8.81215	7.91694	11.7969	7.22516	6.74555	10.0823	11.7269	6.08613	8.7556
Aldh1b1	4.89343	0.0190347	0.581117	2.84658	0.723625	0.999981	2.41205	2.47535	8.40825	4.00552	7.12524	5.89845	5.9115	2.52958	4.32097	5.41241	7.30335	2.91853
Aldh1l1	6.57182	0.188661	0.498308	3.28984	0.655397	0.999981	8.04017	3.30047	7.70757	10.4144	5.54186	1.96615	9.19566	4.21597	5.76129	8.11861	7.30335	7.29633
Aldh2	211.273	0.0800857	0.127084	3.36099	0.644517	0.999981	207.436	199.678	208.805	214.696	207.424	192.683	212.157	207.426	243.414	223.713	254.4	163.438
Aldh3a2	14.4325	-0.0322579	0.349074	2.84188	0.724347	0.999981	13.6683	14.8521	15.4151	15.221	20.584	5.89845	11.823	9.27514	14.4032	12.6289	21.9101	17.5112
Aldh3b1	24.6678	0.0895587	0.275442	0.108691	0.999801	0.999981	19.2964	21.453	28.7282	26.4365	27.7093	19.6615	28.9007	28.6686	23.0452	23.4538	19.4756	29.1853
Aldh4a1	8.51917	0.369388	0.444199	1.28783	0.936179	0.999981	6.43213	9.90141	5.6055	9.61326	7.91694	3.9323	7.882	5.90236	8.64193	13.531	9.7378	13.1334
Aldh6a1	5.76158	0.205828	0.554103	1.73888	0.883965	0.999981	7.23615	4.9507	5.6055	3.20442	6.33355	3.9323	9.19566	5.05916	7.20161	10.8248	1.21723	4.3778
Aldh7a1	6.54755	-0.0298429	0.502955	3.23218	0.66424	0.999981	8.84418	5.77582	7.70757	7.20994	3.95847	5.89845	9.85249	7.58875	2.88064	10.8248	3.65168	4.3778
Aldh9a1	23.4535	0.21234	0.272932	4.54297	0.474155	0.999981	27.3366	21.453	18.9186	18.4254	18.209	25.56	37.4395	22.7662	24.4855	16.2372	24.3445	26.2668
Aldoa	463.735	0.0719398	0.132266	6.14873	0.292015	0.999981	425.325	472.792	597.687	410.166	363.387	446.316	417.746	415.695	530.039	602.581	490.542	392.543
Alg1	12.7049	0.313032	0.364521	1.74668	0.882967	0.999981	9.6482	7.42605	14.0138	16.0221	11.0837	9.83075	9.85249	14.3343	12.9629	14.4331	18.2584	14.5927
Alg10b	14.0274	0.0749552	0.360015	1.45389	0.918329	0.999981	20.1004	13.2019	16.1158	15.221	6.33355	11.7969	11.823	16.8639	15.8435	13.531	15.8239	11.6741
Alg11	4.3573	0.0996504	0.620271	4.42978	0.489333	0.999981	3.21607	6.60094	3.50344	1.60221	3.95847	5.89845	3.28416	4.21597	8.64193	0.902068	6.08613	4.3778
Alg12	5.41139	-0.0862158	0.541435	1.08796	0.955164	0.999981	5.62812	2.47535	7.00688	7.20994	5.54186	5.89845	3.941	5.05916	7.20161	4.51034	6.08613	4.3778
Alg14	4.54901	-0.0622568	0.587221	1.7885	0.877568	0.999981	4.8241	4.12559	4.20413	5.60773	7.12524	1.96615	5.25466	3.37278	4.32097	7.21654	3.65168	2.91853
Alg2	9.83049	0.704514	0.418693	3.72778	0.589235	0.999981	4.8241	7.42605	11.9117	10.4144	6.33355	3.9323	8.53883	11.8047	15.8435	9.92275	18.2584	8.7556
Alg3	6.988	0.168736	0.475314	1.94649	0.856498	0.999981	7.23615	4.9507	11.211	5.60773	4.75016	5.89845	7.22516	5.05916	8.64193	7.21654	7.30335	8.7556
Alg5	20.2523	0.307259	0.297166	3.41838	0.635772	0.999981	16.8844	24.7535	20.3199	12.0166	23.7508	11.7969	21.0187	26.139	27.3661	23.4538	19.4756	16.0519
Alg8	4.92571	0.707699	0.608246	5.11975	0.401441	0.999981	6.43213	0.825117	5.6055	6.40884	1.58339	1.96615	11.823	5.90236	4.32097	4.51034	2.43445	7.29633
Alg9	7.06056	0.53761	0.515778	2.81411	0.728618	0.999981	4.8241	2.47535	5.6055	4.80663	3.16678	17.6954	7.882	6.74555	7.20161	6.31447	12.1723	5.83707
Alkbh2	3.50497	0.411198	0.679522	2.40451	0.790803	0.999981	4.8241	3.30047	5.6055	1.60221	3.16678	0	5.9115	3.37278	2.88064	3.60827	4.8689	2.91853
Alkbh3	7.7669	0.268326	0.471785	1.97105	0.853137	0.999981	3.21607	6.60094	7.70757	9.61326	11.8754	3.9323	6.56833	10.9615	10.0823	9.02068	4.8689	8.7556
Alkbh4	3.61491	-0.0999466	0.702056	2.38487	0.793725	0.999981	7.23615	3.30047	4.90482	1.60221	1.58339	3.9323	3.28416	6.74555	1.44032	1.80414	6.08613	1.45927
Alkbh5	23.3632	0.206461	0.282151	6.0703	0.299438	0.999981	18.4924	18.1526	17.5172	32.0442	19.7923	21.6277	12.4798	22.7662	21.6048	30.6703	31.6479	33.5631
Alkbh6	8.9048	-0.0206594	0.435032	1.03383	0.959791	0.999981	10.4522	12.3768	7.70757	5.60773	9.50033	7.8646	8.53883	10.1183	5.76129	12.6289	6.08613	10.2149
Alkbh7	9.63369	-0.212455	0.422727	1.44682	0.919124	0.999981	8.04017	15.6772	9.10894	8.01105	9.50033	11.7969	11.1662	8.43194	10.0823	9.92275	3.65168	10.2149
Alox5ap	183.472	-0.124765	0.134239	8.13435	0.148985	0.999981	235.577	223.607	168.165	193.066	183.673	145.495	185.227	177.914	180.04	199.357	182.584	126.956
Als2	4.24459	0.629489	0.607475	0.638972	0.986149	0.999981	4.02008	3.30047	2.80275	4.00552	3.16678	1.96615	4.59783	3.37278	4.32097	7.21654	4.8689	7.29633
Als2cl	4.54299	0.65657	0.615758	2.26199	0.811834	0.999981	4.8241	4.12559	1.40138	2.40331	3.16678	5.89845	10.5093	5.90236	5.76129	5.41241	3.65168	1.45927
Alyref	22.8252	-0.0714015	0.282999	5.54074	0.353499	0.999981	20.1004	28.054	28.0275	24.8342	22.9591	15.7292	28.2438	27.8254	31.6871	18.9434	15.8239	11.6741
Ambra1	9.00017	-0.343834	0.471024	1.76966	0.880009	0.999981	12.8643	3.30047	12.6124	16.0221	6.33355	9.83075	3.941	10.1183	4.32097	9.92275	8.52058	10.2149
Amd1	13.4179	-0.0187731	0.363828	1.84759	0.869806	0.999981	13.6683	10.7265	14.7144	12.0166	17.4173	11.7969	14.4503	16.8639	21.6048	9.02068	8.52058	10.2149
Amdhd2	35.9958	0.276254	0.235184	3.23312	0.664096	0.999981	33.7687	32.1796	28.7282	39.2541	24.5425	35.3907	54.5171	29.5118	36.0081	33.3765	36.5168	48.1558
Amfr	53.7184	-0.443114	0.193876	2.22218	0.817625	0.999981	53.8691	63.534	64.4633	52.0718	64.9189	72.7476	40.0668	38.7869	43.2097	45.1034	54.7751	51.0743
Amn1	5.26676	-0.267915	0.571463	5.31533	0.378621	0.999981	5.62812	2.47535	4.20413	5.60773	7.12524	7.8646	2.62733	0.843194	7.20161	7.21654	3.65168	8.7556
Ampd2	6.22471	0.200656	0.532252	1.70713	0.888001	0.999981	8.04017	5.77582	4.20413	6.40884	7.12524	1.96615	9.85249	9.27514	5.76129	6.31447	1.21723	8.7556
Ampd3	9.04769	-0.707067	0.455854	7.31701	0.198111	0.999981	8.84418	9.90141	17.5172	5.60773	10.292	13.7631	3.941	9.27514	8.64193	1.80414	14.6067	4.3778
Amz1	7.37825	0.114463	0.487106	2.7135	0.744052	0.999981	8.84418	9.07629	5.6055	3.20442	10.292	5.89845	11.1662	10.9615	4.32097	9.92275	4.8689	4.3778
Amz2	10.4228	-0.202336	0.434558	1.71381	0.887155	0.999981	11.2562	9.90141	9.10894	12.0166	8.70863	13.7631	5.9115	10.9615	12.9629	5.41241	20.6928	4.3778
Anapc1	10.2039	-0.235652	0.398264	0.385952	0.995708	0.999981	12.8643	11.5516	10.5103	12.8177	11.8754	5.89845	8.53883	8.43194	10.0823	9.92275	9.7378	10.2149
Anapc10	9.02131	-0.000319143	0.421365	1.09667	0.954398	0.999981	8.84418	10.7265	8.40825	12.0166	7.91694	5.89845	11.1662	8.43194	10.0823	9.92275	6.08613	8.7556
Anapc11	54.2977	0.171675	0.193961	2.8946	0.716232	0.999981	56.2812	56.108	55.3543	48.0663	53.0435	37.3569	56.4876	63.2396	51.8516	70.3613	59.644	43.778
Anapc13	13.6086	0.363017	0.350521	5.10131	0.403642	0.999981	12.0603	15.6772	4.90482	12.8177	11.0837	15.7292	16.4208	15.1775	8.64193	16.2372	17.0412	17.5112
Anapc15	7.8888	0.281374	0.463457	3.36688	0.643619	0.999981	10.4522	9.07629	9.80963	5.60773	7.91694	0	12.4798	6.74555	8.64193	8.11861	8.52058	7.29633
Anapc16	19.063	0.331784	0.315334	3.49204	0.624593	0.999981	19.2964	23.1033	19.6193	8.81215	10.292	21.6277	15.1072	25.2958	18.7242	18.9434	23.1273	24.8075
Anapc2	27.6249	-0.0121102	0.2527	2.51662	0.77399	0.999981	24.1205	25.5786	34.3337	21.6298	29.2927	31.4584	22.3323	30.355	25.9258	23.4538	27.9962	35.0224
Anapc4	13.8407	-0.0674503	0.355406	0.605161	0.987766	0.999981	12.8643	18.9777	10.5103	12.8177	15.8339	13.7631	16.4208	9.27514	15.8435	10.8248	15.8239	13.1334
Anapc5	40.5043	-0.0296789	0.220631	1.42381	0.921691	0.999981	41.0049	42.081	45.5447	50.4696	36.4179	29.4923	47.9488	41.3165	31.6871	41.4951	37.734	40.8595
Anapc7	11.2487	-0.20057	0.399695	1.71674	0.886783	0.999981	15.2763	9.90141	11.211	7.20994	11.8754	17.6954	11.1662	17.7071	7.20161	9.92275	8.52058	7.29633
Ang	4.31177	-0.0492101	0.636912	5.78932	0.327261	0.999981	4.02008	9.90141	0.700688	5.60773	3.16678	3.9323	7.22516	5.90236	2.88064	4.51034	2.43445	1.45927
Angel2	8.63278	-0.104152	0.448524	1.95421	0.855444	0.999981	8.84418	6.60094	9.80963	12.0166	6.33355	7.8646	6.56833	7.58875	8.64193	4.51034	7.30335	17.5112
Ank	12.5948	-0.135767	0.366043	4.99305	0.416729	0.999981	14.4723	18.1526	9.80963	12.8177	13.4588	9.83075	15.1072	21.0799	10.0823	11.7269	7.30335	7.29633
Ankfy1	28.562	-0.0628523	0.265679	2.75498	0.737698	0.999981	18.4924	25.5786	37.8371	29.6409	36.4179	27.5261	30.2143	17.7071	25.9258	34.2786	25.5617	33.5631
Ankib1	10.528	0.29297	0.399932	2.81192	0.728954	0.999981	7.23615	9.07629	12.6124	7.20994	7.12524	13.7631	11.1662	7.58875	15.8435	7.21654	15.8239	11.6741
Ankle2	15.1514	-0.406637	0.347056	4.16143	0.526415	0.999981	9.6482	16.5023	16.1158	20.8287	19.7923	19.6615	10.5093	5.90236	15.8435	11.7269	20.6928	14.5927
Ankmy2	3.89921	-0.719092	0.669011	4.29824	0.507323	0.999981	6.43213	2.47535	6.30619	5.60773	6.33355	1.96615	5.9115	3.37278	1.44032	4.51034	2.43445	0
Ankra2	6.56564	-0.313009	0.509457	1.17686	0.947078	0.999981	6.43213	6.60094	9.80963	6.40884	4.75016	9.83075	6.56833	2.52958	7.20161	7.21654	8.52058	2.91853
Ankrd10	4.7142	0.104544	0.598884	2.02548	0.845609	0.999981	7.23615	5.77582	2.80275	5.60773	3.16678	1.96615	3.941	7.58875	2.88064	2.7062	8.52058	4.3778
Ankrd11	3.34675	-0.243835	0.735988	0.800749	0.976986	0.999981	3.21607	3.30047	2.80275	4.80663	3.95847	1.96615	3.941	3.37278	7.20161	0	1.21723	4.3778
Ankrd12	7.04072	0.320891	0.474135	0.597366	0.988124	0.999981	4.8241	5.77582	5.6055	6.40884	7.12524	7.8646	6.56833	7.58875	10.0823	9.02068	4.8689	8.7556
Ankrd13a	46.7036	0.092311	0.20775	2.76743	0.735787	0.999981	36.1808	45.3814	46.9461	54.4751	44.3349	43.2553	42.6941	44.6893	36.0081	55.0261	63.2957	48.1558
Ankrd13b	3.04992	-0.788371	0.756131	4.3508	0.500091	0.999981	3.21607	4.12559	4.20413	4.80663	1.58339	3.9323	1.31367	1.68639	5.76129	4.51034	0	1.45927
Ankrd13c	16.5209	-0.131961	0.319412	1.20465	0.94443	0.999981	16.8844	14.8521	15.4151	24.0331	19.0007	13.7631	18.3913	14.3343	17.2839	15.3352	15.8239	13.1334
Ankrd13d	4.36343	-0.700925	0.632321	2.26987	0.810682	0.999981	4.02008	6.60094	6.30619	4.80663	6.33355	3.9323	4.59783	3.37278	5.76129	5.41241	1.21723	0
Ankrd16	3.64072	0.237357	0.681477	0.485859	0.992632	0.999981	4.8241	4.9507	2.80275	3.20442	3.16678	0	1.9705	3.37278	7.20161	2.7062	3.65168	5.83707
Ankrd17	14.4803	0.10908	0.348274	2.14249	0.829098	0.999981	16.8844	8.25117	16.8165	15.221	8.70863	19.6615	17.7345	16.8639	11.5226	15.3352	12.1723	14.5927
Ankrd24	4.89317	1.03834	0.612708	4.44814	0.486852	0.999981	7.23615	0.825117	2.80275	1.60221	2.37508	5.89845	5.9115	2.52958	10.0823	6.31447	7.30335	5.83707
Ankrd27	5.39932	0.026484	0.574923	3.04894	0.69244	0.999981	3.21607	4.9507	6.30619	7.20994	2.37508	7.8646	7.22516	11.8047	4.32097	2.7062	2.43445	4.3778
Ankrd28	7.68307	-0.320274	0.502047	1.5706	0.904782	0.999981	7.23615	5.77582	9.10894	10.4144	7.91694	9.83075	11.823	13.4911	5.76129	4.51034	4.8689	1.45927
Ankrd33b	10.5899	-0.0815584	0.394001	2.95727	0.706573	0.999981	10.4522	15.6772	10.5103	8.81215	9.50033	9.83075	6.56833	15.1775	12.9629	8.11861	12.1723	7.29633
Ankrd40	26.9902	0.264113	0.255947	1.23422	0.941552	0.999981	24.9245	19.8028	25.9255	23.232	22.9591	31.4584	30.2143	28.6686	33.1274	32.4744	21.9101	29.1853
Ankrd44	6.80659	-0.131097	0.490464	2.43468	0.786298	0.999981	4.8241	5.77582	5.6055	9.61326	7.91694	7.8646	7.22516	4.21597	4.32097	6.31447	4.8689	13.1334
Ankrd46	10.2787	-0.18738	0.416492	3.62348	0.604792	0.999981	10.4522	10.7265	9.80963	12.0166	15.8339	5.89845	6.56833	14.3343	8.64193	17.1393	6.08613	5.83707
Ankrd49	4.00573	0.287284	0.666044	4.31551	0.50494	0.999981	4.02008	6.60094	6.30619	4.80663	0.791694	0	5.9115	5.05916	4.32097	2.7062	6.08613	1.45927
Ankrd50	5.06973	-0.0567098	0.570818	2.79829	0.73105	0.999981	3.21607	2.47535	4.20413	5.60773	7.91694	7.8646	2.62733	4.21597	5.76129	7.21654	2.43445	7.29633
Ankrd54	3.43837	0.575181	0.712184	1.18361	0.94644	0.999981	5.62812	2.47535	2.80275	1.60221	1.58339	1.96615	1.9705	1.68639	7.20161	6.31447	3.65168	4.3778
Anks1	8.24518	-0.363334	0.453906	1.78262	0.878331	0.999981	8.84418	4.12559	7.00688	13.6188	9.50033	13.7631	7.882	6.74555	7.20161	5.41241	6.08613	8.7556
Anks3	4.39821	0.0337831	0.633801	6.37547	0.271378	0.999981	7.23615	4.12559	4.20413	0.801105	3.16678	5.89845	6.56833	0.843194	8.64193	1.80414	3.65168	5.83707
Ano10	11.6874	0.266284	0.382927	2.93058	0.710688	0.999981	12.0603	6.60094	14.7144	8.01105	10.292	11.7969	8.53883	13.4911	21.6048	11.7269	9.7378	11.6741
Ano8	3.71714	0.458247	0.652141	2.78574	0.732976	0.999981	2.41205	2.47535	1.40138	4.00552	4.75016	3.9323	5.25466	3.37278	1.44032	6.31447	4.8689	4.3778
Anp32a	28.4682	0.208317	0.250578	1.32614	0.932219	0.999981	20.1004	26.4037	26.6261	26.4365	30.0844	29.4923	30.8711	32.0414	25.9258	25.2579	37.734	30.6446
Anp32b	22.2591	-0.123221	0.317476	3.93213	0.559229	0.999981	23.3165	19.8028	24.5241	28.0387	11.8754	31.4584	24.3028	38.7869	18.7242	11.7269	17.0412	17.5112
Anp32e	14.0987	-0.0354828	0.349938	8.03713	0.154201	0.999981	24.1205	13.2019	17.5172	12.0166	11.0837	7.8646	21.6755	19.3935	12.9629	13.531	8.52058	7.29633
Antkmt	32.0045	0.0871738	0.238264	0.396741	0.995419	0.999981	28.1406	28.054	33.633	32.8453	30.0844	33.4246	31.528	38.7869	30.2468	27.9641	32.8651	36.4817
Antxr2	22.4775	0.390216	0.28555	3.94066	0.55799	0.999981	19.2964	17.3275	14.0138	20.8287	27.7093	17.6954	21.0187	21.0799	27.3661	37.8868	27.9962	17.5112
Anxa1	287.906	0.00398063	0.116991	7.49347	0.18645	0.999981	217.889	283.84	294.289	332.458	311.136	287.058	240.401	268.979	298.147	287.76	339.606	293.313
Anxa11	33.0515	-0.0280982	0.23319	3.26204	0.659658	0.999981	41.8089	33.8298	28.0275	39.2541	27.7093	29.4923	38.0963	31.1982	34.5677	37.8868	25.5617	29.1853
Anxa2	175.154	-0.00120403	0.134568	2.37075	0.795822	0.999981	176.08	188.127	157.655	201.077	168.631	159.258	199.02	184.66	187.242	172.295	147.284	160.519
Anxa5	171.029	0.29942	0.13559	2.58549	0.763568	0.999981	118.19	160.073	148.546	157.818	155.964	184.818	175.374	183.816	211.727	187.63	180.149	188.245
Anxa7	69.4573	-0.0162663	0.176494	4.73541	0.449017	0.999981	71.5575	59.4084	71.4702	78.5083	79.1694	57.0184	60.4286	59.8668	83.5387	66.753	88.8575	56.9114
Aopep	74.4873	0.256594	0.178792	4.81222	0.439225	0.999981	65.1254	78.3861	74.2729	78.5083	60.9604	47.1876	69.6243	85.1626	112.345	69.4592	82.7713	70.0448
Ap1ar	6.18996	-0.556761	0.548503	1.35627	0.929036	0.999981	8.84418	6.60094	3.50344	8.81215	7.91694	7.8646	5.25466	7.58875	7.20161	6.31447	0	4.3778
Ap1g1	23.7972	0.327869	0.285005	1.45375	0.918345	0.999981	25.7285	10.7265	17.5172	24.8342	22.9591	27.5261	25.6165	28.6686	24.4855	26.16	27.9962	23.3483
Ap1g2	7.80904	0.369659	0.459437	2.03607	0.844131	0.999981	6.43213	3.30047	5.6055	7.20994	7.91694	11.7969	10.5093	7.58875	5.76129	8.11861	12.1723	7.29633
Ap1m1	17.016	0.10847	0.319464	0.293045	0.997772	0.999981	13.6683	14.027	16.1158	15.221	20.584	19.6615	16.4208	21.923	17.2839	19.8455	13.3895	16.0519
Ap1s1	48.4194	-0.194545	0.20476	0.779437	0.978326	0.999981	53.0651	48.6819	56.7557	48.8674	45.1265	58.9845	50.5761	51.4348	34.5677	47.8096	41.3857	43.778
Ap1s2	25.0012	-0.368513	0.266863	2.42536	0.787692	0.999981	32.1607	28.8791	29.4289	28.0387	26.1259	23.5938	27.587	21.923	27.3661	22.5517	13.3895	18.9705
Ap2a1	22.8232	-0.0600121	0.276425	1.46692	0.916855	0.999981	25.7285	24.7535	23.8234	24.8342	22.1674	17.6954	19.705	28.6686	24.4855	18.9434	25.5617	17.5112
Ap2a2	24.5168	0.00827993	0.275657	6.62595	0.249978	0.999981	29.7486	23.1033	9.80963	28.0387	29.2927	27.5261	19.705	26.9822	17.2839	27.9641	25.5617	29.1853
Ap2b1	30.1799	0.309131	0.261062	1.14917	0.949659	0.999981	22.5125	32.1796	26.6261	28.8398	20.584	31.4584	36.1258	37.1005	38.8887	21.6496	41.3857	24.8075
Ap2m1	173.739	0.106194	0.133973	4.27298	0.510819	0.999981	170.452	170.799	145.743	162.624	171.006	176.954	187.197	186.346	159.876	165.078	150.936	237.86
Ap2s1	128.348	0.0532719	0.143392	5.90527	0.315546	0.999981	144.723	141.92	105.804	150.608	114.796	98.3075	143.846	141.657	128.189	138.918	113.202	118.201
Ap3b1	22.6706	0.27016	0.291354	3.80037	0.578501	0.999981	29.7486	13.2019	16.1158	24.8342	22.1674	15.7292	23.646	23.6094	14.4032	24.3558	29.2134	35.0224
Ap3d1	40.0133	0.131473	0.219346	4.02421	0.545936	0.999981	26.5326	33.0047	43.4427	39.2541	39.5847	49.1538	35.469	38.7869	47.5306	50.5158	31.6479	45.2373
Ap3m1	16.4885	0.14294	0.327707	2.90264	0.714992	0.999981	15.2763	16.5023	21.7213	16.8232	11.8754	11.7969	23.646	22.7662	12.9629	18.9434	10.955	14.5927
Ap3m2	9.35888	0.291787	0.417634	3.48217	0.626088	0.999981	8.84418	6.60094	6.30619	6.40884	7.12524	15.7292	8.53883	7.58875	10.0823	11.7269	7.30335	16.0519
Ap3s1	45.9409	0.468842	0.207187	6.65273	0.247774	0.999981	45.829	44.5563	43.4427	32.8453	33.2511	31.4584	55.174	71.6715	60.4935	46.9075	53.5579	32.1039
Ap3s2	10.621	0.331401	0.405179	2.07183	0.83912	0.999981	5.62812	10.7265	6.30619	8.01105	15.0422	11.7969	11.823	8.43194	15.8435	9.02068	14.6067	10.2149
Ap4b1	4.43981	0.581855	0.609201	2.3464	0.799428	0.999981	4.02008	2.47535	3.50344	2.40331	4.75016	3.9323	7.22516	2.52958	2.88064	8.11861	8.52058	2.91853
Ap4m1	2.89017	0.280027	0.74683	3.01936	0.697001	0.999981	5.62812	0.825117	1.40138	1.60221	3.16678	3.9323	4.59783	1.68639	2.88064	3.60827	2.43445	2.91853
Ap4s1	10.1213	-0.131532	0.410298	1.61356	0.899605	0.999981	6.43213	9.90141	10.5103	9.61326	11.8754	15.7292	10.5093	9.27514	5.76129	12.6289	6.08613	13.1334
Ap5b1	15.9361	-0.0680447	0.344739	6.05256	0.301138	0.999981	20.9044	10.7265	16.8165	11.2155	15.0422	21.6277	15.764	5.05916	12.9629	18.0414	25.5617	17.5112
Ap5m1	6.4272	0.0914803	0.561379	4.61623	0.464485	0.999981	9.6482	3.30047	4.90482	6.40884	1.58339	9.83075	3.28416	1.68639	5.76129	5.41241	12.1723	13.1334
Ap5s1	11.9515	0.540989	0.378713	0.650863	0.985556	0.999981	13.6683	12.3768	7.70757	7.20994	9.50033	7.8646	13.1367	13.4911	18.7242	14.4331	12.1723	13.1334
Ap5z1	9.2137	0.336954	0.428827	2.47344	0.78049	0.999981	9.6482	5.77582	6.30619	7.20994	10.292	9.83075	9.19566	7.58875	10.0823	14.4331	15.8239	4.3778
Apaf1	8.56108	-0.687675	0.451528	1.20576	0.944324	0.999981	11.2562	9.07629	7.70757	9.61326	7.12524	19.6615	5.25466	6.74555	8.64193	4.51034	7.30335	5.83707
Apba3	6.45519	-0.0779347	0.543779	2.84248	0.724255	0.999981	0.804017	5.77582	9.80963	6.40884	8.70863	9.83075	7.22516	4.21597	7.20161	3.60827	10.955	2.91853
Apbb1ip	37.2282	-0.0332158	0.229001	4.97624	0.418787	0.999981	52.2611	36.3052	36.4358	28.0387	39.5847	33.4246	44.6646	37.1005	50.4113	31.5724	29.2134	27.7261
Apbb2	13.025	0.0362491	0.36978	9.02472	0.108082	0.999981	15.2763	22.2782	15.4151	7.20994	13.4588	3.9323	13.1367	21.0799	17.2839	12.6289	7.30335	7.29633
Apc	7.94562	-0.0875738	0.480138	1.98711	0.850926	0.999981	9.6482	4.9507	10.5103	4.80663	8.70863	9.83075	3.941	5.90236	4.32097	10.8248	14.6067	7.29633
Apeh	16.4034	0.118795	0.343991	3.01181	0.698164	0.999981	10.4522	15.6772	18.2179	20.8287	9.50033	19.6615	9.85249	16.0207	20.1645	15.3352	27.9962	13.1334
Apex1	15.6668	-0.181369	0.334736	4.03545	0.544323	0.999981	24.1205	17.3275	16.1158	14.4199	12.6671	13.7631	17.0777	14.3343	21.6048	14.4331	6.08613	16.0519
Aph1a	36.9024	-0.249201	0.236549	3.5996	0.608374	0.999981	50.6531	34.6549	35.0344	40.8563	47.5016	29.4923	34.8121	34.571	17.2839	40.5931	36.5168	40.8595
Aph1b	3.66149	0.056815	0.692228	3.30049	0.653767	0.999981	2.41205	2.47535	4.20413	2.40331	7.12524	1.96615	5.25466	0	2.88064	4.51034	4.8689	5.83707
Api5	29.1126	0.119424	0.247169	0.350428	0.996586	0.999981	28.1406	31.3545	24.5241	29.6409	24.5425	29.4923	29.5575	26.9822	30.2468	34.2786	32.8651	27.7261
Apip	11.8504	-0.414848	0.374122	2.90338	0.714879	0.999981	15.2763	12.3768	14.7144	8.01105	16.6256	13.7631	11.823	8.43194	7.20161	7.21654	12.1723	14.5927
Aplp2	95.7609	0.591222	0.159356	8.30381	0.140268	0.999981	69.9495	61.0587	74.2729	76.1049	92.6282	80.6122	103.123	100.34	99.3822	93.8151	160.674	137.171
Apmap	8.62743	0.0628739	0.438194	2.90866	0.714065	0.999981	11.2562	12.3768	5.6055	8.81215	4.75016	7.8646	11.1662	8.43194	11.5226	8.11861	4.8689	8.7556
Apobec3	8.09622	0.340518	0.459814	3.97253	0.553378	0.999981	7.23615	4.9507	7.70757	11.2155	9.50033	1.96615	11.1662	5.90236	14.4032	6.31447	10.955	5.83707
Apobr	29.5671	-0.290592	0.253853	1.84254	0.870475	0.999981	25.7285	25.5786	29.4289	39.2541	39.5847	37.3569	22.9892	27.8254	31.6871	31.5724	21.9101	21.889
Apoc2	3.95853	-0.512351	0.701569	5.02357	0.41301	0.999981	3.21607	2.47535	0.700688	7.20994	6.33355	7.8646	3.941	3.37278	1.44032	0	3.65168	7.29633
Apoo	5.67442	0.228851	0.529794	2.55745	0.767819	0.999981	7.23615	4.9507	4.20413	4.80663	7.91694	1.96615	7.22516	3.37278	7.20161	6.31447	8.52058	4.3778
Apool	6.11227	-0.460382	0.52932	1.99784	0.849444	0.999981	8.04017	4.9507	5.6055	8.81215	4.75016	9.83075	3.28416	5.05916	1.44032	7.21654	8.52058	5.83707
Appbp2	7.99196	-0.756296	0.453809	0.415371	0.994896	0.999981	8.84418	9.07629	9.80963	12.0166	12.6671	7.8646	5.25466	7.58875	5.76129	6.31447	4.8689	5.83707
Appl1	8.9513	-0.0658126	0.42905	3.72308	0.589934	0.999981	6.43213	8.25117	15.4151	12.0166	7.12524	5.89845	9.19566	6.74555	10.0823	12.6289	4.8689	8.7556
Appl2	11.9309	0.373228	0.379533	0.683094	0.983884	0.999981	10.4522	11.5516	7.70757	9.61326	8.70863	15.7292	16.4208	15.1775	12.9629	11.7269	15.8239	7.29633
Aprt	69.7726	0.431301	0.177942	4.96139	0.42061	0.999981	69.1454	66.0094	66.5654	46.4641	51.4601	57.0184	86.702	85.1626	97.9419	82.0882	57.2096	71.5041
Aptx	9.05327	0.142995	0.44546	1.71139	0.887462	0.999981	6.43213	4.9507	7.70757	11.2155	9.50033	11.7969	5.9115	16.0207	7.20161	7.21654	13.3895	7.29633
Aqr	10.5576	0.262261	0.399496	0.95077	0.966438	0.999981	9.6482	9.07629	9.80963	5.60773	14.2505	9.83075	13.7935	8.43194	10.0823	13.531	10.955	11.6741
Araf	21.185	-0.141383	0.293251	0.118873	0.999752	0.999981	24.9245	24.7535	18.2179	20.0276	18.209	27.5261	17.7345	16.8639	23.0452	19.8455	25.5617	17.5112
Arap2	3.34997	-0.245255	0.701213	2.27376	0.810113	0.999981	5.62812	3.30047	4.90482	1.60221	3.95847	1.96615	6.56833	2.52958	1.44032	2.7062	1.21723	4.3778
Arap3	6.80738	-0.476223	0.500493	2.2745	0.810004	0.999981	8.04017	8.25117	7.00688	11.2155	5.54186	5.89845	8.53883	3.37278	5.76129	5.41241	2.43445	10.2149
Arcn1	34.1416	0.192729	0.231091	1.74548	0.883122	0.999981	27.3366	35.48	42.0413	32.0442	30.8761	23.5938	34.1553	38.7869	37.4484	35.1806	37.734	35.0224
Arf1	137.143	-0.061327	0.145299	1.53098	0.909468	0.999981	143.115	158.422	147.845	129.779	125.088	133.698	132.68	115.518	152.674	147.037	116.854	143.008
Arf2	17.0239	0.236467	0.324636	2.70071	0.74601	0.999981	22.5125	15.6772	13.3131	20.0276	15.8339	5.89845	19.705	16.8639	18.7242	15.3352	24.3445	16.0519
Arf3	50.1055	0.0703348	0.195284	5.51714	0.35607	0.999981	37.7888	39.6056	49.0482	51.2707	55.4186	60.9507	41.3805	39.6301	57.6129	53.222	58.4268	56.9114
Arf5	59.4755	0.0438835	0.184575	1.66228	0.893617	0.999981	55.4772	51.1573	61.6605	56.8784	56.2103	70.7814	61.0855	64.0828	60.4935	55.9282	49.9062	70.0448
Arf6	52.9482	0.240287	0.196233	1.90163	0.862582	0.999981	44.2209	54.4577	52.5516	50.4696	41.1681	47.1876	46.6351	58.1804	48.971	70.3613	58.4268	62.7485
Arfgap1	8.1909	-0.0362123	0.469612	0.888056	0.97108	0.999981	6.43213	5.77582	11.9117	4.80663	11.8754	9.83075	9.85249	10.9615	5.76129	7.21654	3.65168	10.2149
Arfgap2	14.7202	-0.0335863	0.3416	0.994236	0.963029	0.999981	12.0603	12.3768	16.1158	17.6243	21.3757	9.83075	15.1072	13.4911	11.5226	16.2372	13.3895	17.5112
Arfgap3	8.64677	0.423212	0.470451	0.681217	0.983984	0.999981	4.02008	9.90141	13.3131	6.40884	8.70863	1.96615	9.85249	8.43194	5.76129	10.8248	8.52058	16.0519
Arfgef1	10.1291	-0.14455	0.415374	0.963744	0.965437	0.999981	15.2763	9.90141	10.5103	9.61326	11.8754	5.89845	5.9115	11.8047	7.20161	12.6289	12.1723	8.7556
Arfgef2	10.1371	-0.248988	0.414961	5.15499	0.397259	0.999981	8.04017	9.90141	11.211	20.0276	8.70863	7.8646	11.1662	6.74555	14.4032	12.6289	3.65168	7.29633
Arfgef3	7.39543	1.36046	0.502427	3.74006	0.587414	0.999981	5.62812	4.12559	2.80275	3.20442	3.16678	5.89845	13.7935	16.8639	5.76129	15.3352	4.8689	7.29633
Arfip1	11.0949	-0.474673	0.391299	3.65002	0.600819	0.999981	12.0603	16.5023	11.9117	8.01105	19.0007	9.83075	9.19566	6.74555	8.64193	8.11861	15.8239	7.29633
Arfip2	8.67275	-0.373759	0.450547	1.07728	0.956095	0.999981	8.84418	13.2019	4.90482	11.2155	11.0837	9.83075	7.22516	7.58875	11.5226	7.21654	8.52058	2.91853
Arfrp1	9.02526	-0.285103	0.461197	1.9899	0.85054	0.999981	11.2562	15.6772	9.80963	7.20994	11.8754	1.96615	3.941	11.8047	8.64193	8.11861	4.8689	13.1334
Arglu1	12.8656	-0.434516	0.366767	3.07117	0.689015	0.999981	20.9044	15.6772	13.3131	13.6188	7.91694	17.6954	14.4503	11.8047	11.5226	6.31447	10.955	10.2149
Arhgap1	14.5125	0.259032	0.349929	1.72458	0.885788	0.999981	13.6683	10.7265	21.0206	15.221	8.70863	9.83075	12.4798	14.3343	12.9629	18.9434	15.8239	20.4297
Arhgap10	20.3293	0.0309601	0.288603	0.841873	0.974286	0.999981	19.2964	20.6279	19.6193	20.8287	20.584	19.6615	20.3618	18.5503	18.7242	21.6496	27.9962	16.0519
Arhgap11a	8.92303	0.0481402	0.450738	5.23487	0.387894	0.999981	10.4522	12.3768	4.90482	12.0166	6.33355	5.89845	10.5093	15.1775	14.4032	7.21654	4.8689	2.91853
Arhgap12	10.2943	0.185709	0.403604	1.50783	0.912165	0.999981	13.6683	8.25117	6.30619	6.40884	10.292	13.7631	9.85249	8.43194	10.0823	12.6289	12.1723	11.6741
Arhgap15	3.63618	-1.04344	0.713031	2.8761	0.71908	0.999981	3.21607	4.12559	3.50344	1.60221	6.33355	11.7969	2.62733	2.52958	4.32097	0.902068	1.21723	1.45927
Arhgap17	26.7489	0.0582527	0.25913	4.87851	0.430886	0.999981	18.4924	18.1526	25.9255	29.6409	38.793	27.5261	21.0187	26.139	24.4855	27.062	31.6479	32.1039
Arhgap18	19.2786	0.374041	0.298338	6.06074	0.300354	0.999981	14.4723	13.2019	10.5103	19.2265	17.4173	27.5261	21.6755	20.2367	11.5226	26.16	23.1273	26.2668
Arhgap19	10.9183	-0.00613448	0.402807	7.95989	0.15846	0.999981	12.8643	9.07629	5.6055	6.40884	14.2505	15.7292	11.1662	6.74555	12.9629	3.60827	12.1723	20.4297
Arhgap21	4.96893	0.249522	0.558527	0.243201	0.998577	0.999981	4.8241	3.30047	5.6055	4.00552	5.54186	3.9323	5.9115	6.74555	5.76129	4.51034	3.65168	5.83707
Arhgap22	9.63096	-0.182478	0.48015	0.716819	0.982033	0.999981	10.4522	14.027	2.80275	12.0166	7.12524	15.7292	5.25466	8.43194	14.4032	9.02068	13.3895	2.91853
Arhgap23	5.29206	-0.417992	0.570105	0.688243	0.983608	0.999981	8.04017	4.12559	7.00688	5.60773	4.75016	5.89845	2.62733	6.74555	1.44032	6.31447	3.65168	7.29633
Arhgap24	8.79253	0.40653	0.454915	4.40844	0.492226	0.999981	8.04017	12.3768	11.211	8.01105	2.37508	3.9323	13.7935	9.27514	5.76129	14.4331	6.08613	10.2149
Arhgap25	21.5671	0.160311	0.288801	3.16103	0.675176	0.999981	24.1205	18.9777	21.7213	17.6243	22.9591	15.7292	34.1553	20.2367	12.9629	21.6496	26.779	21.889
Arhgap27	7.2766	-0.377486	0.498447	1.69484	0.889549	0.999981	4.8241	6.60094	10.5103	7.20994	8.70863	11.7969	5.9115	9.27514	2.88064	4.51034	12.1723	2.91853
Arhgap30	44.7364	-0.436138	0.213315	6.79934	0.235996	0.999981	39.3968	36.3052	51.1502	64.8895	57.002	58.9845	28.2438	31.1982	38.8887	32.4744	48.689	49.6151
Arhgap31	19.4781	-0.210652	0.299486	6.86445	0.230918	0.999981	20.9044	12.3768	19.6193	24.8342	17.4173	29.4923	17.0777	9.27514	14.4032	18.9434	23.1273	26.2668
Arhgap35	6.48364	-0.355808	0.502865	1.73622	0.884305	0.999981	11.2562	4.12559	6.30619	8.01105	6.33355	7.8646	5.25466	4.21597	4.32097	7.21654	8.52058	4.3778
Arhgap39	4.1537	0.416532	0.656501	1.20508	0.944389	0.999981	4.02008	0	5.6055	4.00552	4.75016	3.9323	4.59783	5.05916	1.44032	4.51034	6.08613	5.83707
Arhgap4	7.27223	0.159726	0.463848	2.05487	0.841502	0.999981	8.84418	6.60094	7.70757	4.80663	7.12524	5.89845	11.1662	7.58875	7.20161	4.51034	8.52058	7.29633
Arhgap45	43.1519	-0.178433	0.218116	2.68799	0.747954	0.999981	45.829	38.7805	34.3337	56.0773	57.7936	41.2892	44.6646	32.8846	38.8887	39.691	36.5168	51.0743
Arhgap5	4.04242	-0.464525	0.632579	0.820139	0.975731	0.999981	6.43213	3.30047	4.90482	5.60773	5.54186	1.96615	2.62733	4.21597	4.32097	1.80414	4.8689	2.91853
Arhgap9	20.1526	0.231563	0.297229	3.50223	0.62305	0.999981	16.0803	12.3768	16.1158	23.232	18.209	25.56	21.6755	16.0207	18.7242	17.1393	30.4306	26.2668
Arhgdia	294.437	0.121821	0.117268	2.26989	0.810679	0.999981	287.838	306.944	292.888	285.994	234.341	285.092	333.014	280.784	306.789	329.255	282.396	307.905
Arhgdib	168.145	-0.170918	0.135574	0.68108	0.983991	0.999981	184.12	192.252	168.866	167.431	177.339	176.954	164.865	134.068	162.756	154.254	180.149	154.682
Arhgef1	27.4509	-0.0393654	0.271894	1.90965	0.8615	0.999981	28.1406	19.8028	28.0275	30.442	26.9176	31.4584	23.646	37.9437	21.6048	22.5517	19.4756	39.4002
Arhgef11	4.62079	0.421597	0.634207	2.37721	0.794863	0.999981	1.60803	1.65023	7.70757	7.20994	1.58339	5.89845	6.56833	6.74555	7.20161	2.7062	3.65168	2.91853
Arhgef12	8.76765	-0.180497	0.436993	1.02643	0.960406	0.999981	10.4522	9.07629	9.80963	8.81215	8.70863	7.8646	7.882	5.90236	4.32097	9.02068	14.6067	8.7556
Arhgef18	3.52142	0.586138	0.729836	1.37857	0.926643	0.999981	0	2.47535	4.20413	3.20442	3.16678	3.9323	7.22516	0.843194	4.32097	6.31447	3.65168	2.91853
Arhgef2	36.521	-0.140502	0.226105	1.80832	0.874981	0.999981	28.9446	40.4307	33.633	40.0552	43.5432	45.2215	31.528	34.571	33.1274	41.4951	36.5168	29.1853
Arhgef3	6.86282	-0.356056	0.513479	5.33555	0.376315	0.999981	6.43213	4.12559	7.00688	12.8177	10.292	3.9323	3.941	4.21597	4.32097	3.60827	15.8239	5.83707
Arhgef6	10.674	-0.11658	0.405485	1.39739	0.924599	0.999981	8.04017	11.5516	9.10894	9.61326	19.0007	9.83075	7.882	13.4911	10.0823	11.7269	6.08613	11.6741
Arhgef7	30.5022	-0.0114901	0.261015	4.69313	0.454466	0.999981	44.2209	36.3052	39.2385	26.4365	22.9591	15.7292	36.7826	33.7278	20.1645	31.5724	34.0823	24.8075
Arid1a	14.3678	-0.106976	0.340476	0.358786	0.996389	0.999981	16.0803	16.5023	14.0138	15.221	16.6256	9.83075	12.4798	16.0207	11.5226	14.4331	12.1723	17.5112
Arid1b	14.3745	-0.206066	0.350546	3.33729	0.648137	0.999981	13.6683	11.5516	11.9117	12.8177	22.1674	19.6615	13.1367	10.1183	12.9629	12.6289	8.52058	23.3483
Arid2	4.81939	0.442769	0.581419	2.2804	0.809141	0.999981	6.43213	3.30047	2.10206	3.20442	4.75016	3.9323	5.25466	6.74555	4.32097	2.7062	4.8689	10.2149
Arid3a	11.6461	-0.0380594	0.39491	3.53239	0.618493	0.999981	12.8643	7.42605	9.10894	14.4199	11.0837	13.7631	15.1072	8.43194	14.4032	5.41241	7.30335	20.4297
Arid4a	5.91657	0.364314	0.518865	3.38161	0.641372	0.999981	3.21607	3.30047	7.70757	5.60773	5.54186	5.89845	5.25466	3.37278	10.0823	8.11861	8.52058	4.3778
Arid4b	4.02826	0.299574	0.630446	2.43341	0.786489	0.999981	4.02008	2.47535	2.10206	4.00552	3.16678	5.89845	6.56833	3.37278	1.44032	3.60827	7.30335	4.3778
Arid5a	3.24908	-0.552435	0.752824	4.72579	0.450253	0.999981	2.41205	1.65023	5.6055	8.01105	5.54186	0	2.62733	0.843194	0	4.51034	4.8689	2.91853
Arid5b	4.9474	0.526735	0.58218	4.24187	0.515143	0.999981	1.60803	1.65023	3.50344	7.20994	4.75016	5.89845	3.941	4.21597	4.32097	4.51034	6.08613	11.6741
Arih1	22.8582	-0.0819142	0.282652	6.35601	0.273103	0.999981	16.0803	20.6279	24.5241	34.4475	17.4173	27.5261	21.0187	20.2367	27.3661	23.4538	10.955	30.6446
Arih2	9.00027	0.539245	0.431489	1.71161	0.887434	0.999981	6.43213	4.9507	8.40825	4.80663	7.12524	13.7631	8.53883	10.9615	7.20161	11.7269	10.955	13.1334
Arl1	39.8567	-0.191968	0.225622	0.741543	0.980611	0.999981	40.2008	53.6326	39.2385	44.0608	33.2511	45.2215	41.3805	29.5118	41.7693	39.691	35.2995	35.0224
Arl11	39.556	0.0547879	0.224539	0.639492	0.986124	0.999981	40.2008	46.2066	36.4358	28.8398	44.3349	37.3569	44.6646	34.571	44.65	41.4951	36.5168	39.4002
Arl14ep	9.24026	0.175552	0.450208	5.37758	0.371556	0.999981	4.02008	13.2019	7.00688	11.2155	14.2505	1.96615	5.25466	12.6479	12.9629	4.51034	12.1723	11.6741
Arl2	16.3969	0.269247	0.329376	1.01994	0.960942	0.999981	14.4723	14.027	19.6193	15.221	15.0422	9.83075	23.646	21.0799	15.8435	11.7269	15.8239	20.4297
Arl2bp	12.0054	-0.0460615	0.3791	2.78178	0.733585	0.999981	20.9044	14.027	10.5103	9.61326	8.70863	9.83075	11.1662	16.8639	8.64193	12.6289	10.955	10.2149
Arl3	13.8006	0.118188	0.353625	3.63348	0.603294	0.999981	15.2763	7.42605	7.70757	20.8287	15.8339	13.7631	13.7935	14.3343	11.5226	17.1393	13.3895	14.5927
Arl4a	5.13603	-0.101479	0.553658	1.38623	0.925814	0.999981	5.62812	4.12559	5.6055	4.80663	3.95847	7.8646	7.22516	5.90236	4.32097	2.7062	3.65168	5.83707
Arl4c	51.7227	-0.337476	0.200414	5.24258	0.386998	0.999981	59.4972	61.8838	36.4358	49.6685	60.9604	80.6122	41.3805	50.5916	43.2097	37.8868	47.4718	51.0743
Arl5a	16.3489	0.211239	0.32621	3.45534	0.630155	0.999981	10.4522	14.027	16.8165	13.6188	23.7508	11.7969	13.1367	16.8639	11.5226	18.9434	21.9101	23.3483
Arl6	3.66312	-0.181683	0.688056	3.12279	0.681062	0.999981	5.62812	3.30047	2.80275	1.60221	3.16678	5.89845	3.28416	2.52958	7.20161	2.7062	0	5.83707
Arl6ip1	87.8552	0.219227	0.159288	1.12138	0.952194	0.999981	73.9695	74.2605	84.7832	89.7237	85.5029	80.6122	95.8976	92.7514	99.3822	101.934	93.7264	81.7189
Arl6ip4	13.5734	0.0687951	0.359457	0.383474	0.995773	0.999981	10.4522	15.6772	12.6124	16.8232	10.292	13.7631	19.705	11.8047	14.4032	10.8248	13.3895	13.1334
Arl6ip5	82.9006	-0.0135917	0.167569	3.49771	0.623734	0.999981	66.7334	83.3368	96.6949	76.1049	96.5866	80.6122	67.6538	88.5354	69.1355	85.6964	96.1608	87.556
Arl6ip6	7.55583	0.123778	0.47724	3.13991	0.678426	0.999981	11.2562	11.5516	4.90482	5.60773	7.12524	1.96615	9.19566	9.27514	7.20161	3.60827	7.30335	11.6741
Arl8a	67.3327	0.0332791	0.176392	3.95869	0.555379	0.999981	65.1254	86.6373	65.164	54.4751	70.4608	57.0184	66.3401	73.3579	70.5758	55.0261	76.6852	67.1263
Arl8b	91.4726	0.542654	0.161201	2.59461	0.762185	0.999981	81.2057	75.9108	86.1846	64.8895	76.0026	62.9168	111.662	128.166	112.345	110.052	94.9436	93.3931
Armc1	13.0173	0.0722315	0.368573	1.9082	0.861696	0.999981	12.8643	18.9777	16.8165	8.01105	7.91694	11.7969	11.823	11.8047	11.5226	13.531	12.1723	18.9705
Armc10	9.26126	-0.599823	0.457264	1.00935	0.961808	0.999981	12.0603	14.027	8.40825	8.01105	15.8339	7.8646	8.53883	9.27514	5.76129	9.92275	1.21723	10.2149
Armc5	8.88554	0.0508958	0.446075	0.627265	0.986721	0.999981	10.4522	13.2019	4.90482	10.4144	5.54186	7.8646	6.56833	6.74555	10.0823	9.92275	12.1723	8.7556
Armc7	5.65303	0.194473	0.553079	6.72757	0.241702	0.999981	6.43213	3.30047	7.00688	2.40331	8.70863	1.96615	5.25466	1.68639	7.20161	2.7062	10.955	10.2149
Armc8	8.02497	0.119959	0.479858	6.55488	0.255903	0.999981	1.60803	8.25117	5.6055	13.6188	11.0837	5.89845	5.9115	4.21597	4.32097	9.02068	12.1723	14.5927
Armcx3	14.3483	0.00164736	0.340264	0.560085	0.989758	0.999981	12.0603	10.7265	14.0138	13.6188	17.4173	19.6615	14.4503	14.3343	15.8435	13.531	13.3895	13.1334
Armh3	4.80478	0.468688	0.599339	1.13888	0.950605	0.999981	5.62812	4.12559	3.50344	4.00552	2.37508	3.9323	3.941	4.21597	7.20161	6.31447	10.955	1.45927
Armt1	4.67822	0.555376	0.61026	3.65904	0.599472	0.999981	5.62812	8.25117	2.10206	3.20442	3.95847	0	3.941	5.90236	7.20161	4.51034	8.52058	2.91853
Arnt	9.96755	-0.0487317	0.420204	3.39994	0.63858	0.999981	8.84418	4.12559	9.80963	8.81215	15.0422	15.7292	6.56833	8.43194	7.20161	15.3352	10.955	8.7556
Arpc1a	21.6151	0.165016	0.286289	1.38056	0.926428	0.999981	24.9245	21.453	18.2179	23.232	23.7508	9.83075	23.646	21.0799	23.0452	26.16	20.6928	23.3483
Arpc1b	293.673	-0.138894	0.115895	2.10582	0.834317	0.999981	293.466	322.621	332.827	318.039	283.426	294.923	265.361	299.334	259.258	313.92	251.966	288.935
Arpc2	236.402	-0.0417515	0.120537	0.860976	0.972982	0.999981	245.225	250.01	255.751	243.536	211.382	232.006	222.01	238.624	246.295	219.202	234.925	237.86
Arpc3	266.141	-0.0138243	0.116762	5.13328	0.399833	0.999981	297.486	266.513	250.846	288.398	243.842	257.566	297.545	278.254	249.176	304.899	237.359	221.809
Arpc4	186.435	0.00360598	0.129471	1.74966	0.882585	0.999981	184.924	208.755	203.9	192.265	162.297	165.157	192.452	200.68	171.398	189.434	177.715	188.245
Arpc5	182.876	0.188157	0.12724	3.74834	0.586187	0.999981	179.296	181.526	170.267	181.05	152.797	159.258	199.02	219.23	181.481	221.909	161.891	186.786
Arpc5l	25.5797	-0.126054	0.277989	4.17564	0.524415	0.999981	29.7486	26.4037	28.7282	31.2431	23.7508	17.6954	28.2438	35.4142	25.9258	25.2579	9.7378	24.8075
Arpp19	50.2616	-0.0162912	0.198211	2.48928	0.778108	0.999981	46.633	49.507	62.3612	57.6795	42.7515	45.2215	53.2035	54.8076	57.6129	46.0055	45.0373	42.3187
Arrb1	26.047	-0.102622	0.261288	5.47219	0.361005	0.999981	29.7486	18.9777	22.422	27.2376	27.7093	33.4246	24.3028	16.8639	25.9258	20.7476	24.3445	40.8595
Arrb2	76.9336	-0.403127	0.169981	2.85603	0.72217	0.999981	93.2659	91.588	68.6674	84.116	83.1279	104.206	65.0265	64.926	67.6951	60.4385	58.4268	81.7189
Arrdc1	14.4062	-0.125004	0.361705	3.69657	0.593874	0.999981	11.2562	14.027	11.211	15.221	13.4588	23.5938	15.1072	5.90236	18.7242	8.11861	15.8239	20.4297
Arrdc2	3.17207	-0.554631	0.793964	2.80777	0.729592	0.999981	5.62812	1.65023	3.50344	4.80663	5.54186	0	3.941	2.52958	0	0	6.08613	4.3778
Arrdc4	7.36069	-0.616728	0.484507	2.21129	0.819204	0.999981	5.62812	8.25117	9.10894	8.81215	6.33355	15.7292	5.9115	5.05916	10.0823	2.7062	4.8689	5.83707
Arsa	8.11946	-0.571817	0.449586	2.91538	0.713029	0.999981	14.4723	4.9507	9.10894	10.4144	7.91694	11.7969	7.882	4.21597	5.76129	6.31447	7.30335	7.29633
Arsk	4.16835	0.217977	0.669081	1.13778	0.950705	0.999981	4.02008	4.9507	5.6055	1.60221	3.16678	1.96615	4.59783	3.37278	0	5.41241	3.65168	11.6741
Asah1	108.626	0.0468639	0.15834	4.98393	0.417845	0.999981	94.07	100.664	105.804	98.5359	112.421	127.8	94.5839	111.302	76.3371	114.563	144.85	122.578
Asah2	4.29541	-0.98952	0.66401	1.63839	0.896568	0.999981	4.02008	2.47535	2.10206	10.4144	7.12524	9.83075	3.941	3.37278	2.88064	2.7062	1.21723	1.45927
Asap1	24.3771	-0.0101473	0.274059	1.09672	0.954394	0.999981	26.5326	20.6279	31.531	19.2265	24.5425	25.56	24.3028	31.1982	21.6048	21.6496	26.779	18.9705
Asb13	4.2198	0.312084	0.631181	0.883928	0.971374	0.999981	1.60803	3.30047	2.80275	7.20994	6.33355	1.96615	5.25466	5.05916	4.32097	4.51034	2.43445	5.83707
Asb6	10.9272	0.213375	0.384207	3.03709	0.694268	0.999981	8.84418	13.2019	9.80963	9.61326	11.0837	7.8646	8.53883	18.5503	11.5226	12.6289	12.1723	7.29633
Asb7	3.65008	-0.405924	0.673033	3.00219	0.699648	0.999981	4.8241	2.47535	7.00688	5.60773	2.37508	1.96615	1.31367	1.68639	4.32097	5.41241	2.43445	4.3778
Asb8	9.15778	0.434371	0.439379	0.158168	0.9995	0.999981	9.6482	4.9507	8.40825	8.01105	4.75016	11.7969	7.22516	13.4911	8.64193	10.8248	13.3895	8.7556
Ascc1	8.19442	-0.324714	0.461513	0.442939	0.994064	0.999981	9.6482	12.3768	8.40825	6.40884	8.70863	7.8646	6.56833	3.37278	5.76129	9.02068	8.52058	11.6741
Ascc2	11.4344	0.381865	0.377339	2.66493	0.751477	0.999981	12.0603	6.60094	10.5103	14.4199	10.292	5.89845	13.1367	11.8047	12.9629	17.1393	12.1723	10.2149
Ascc3	7.34832	0.119744	0.46959	4.28842	0.508681	0.999981	3.21607	4.12559	9.10894	8.81215	9.50033	7.8646	3.941	6.74555	8.64193	9.92275	6.08613	10.2149
Asf1a	4.36843	-0.611493	0.63088	7.14242	0.210262	0.999981	4.8241	8.25117	7.70757	6.40884	1.58339	1.96615	2.62733	6.74555	4.32097	3.60827	0	4.3778
Asf1b	5.46057	0.148009	0.55618	5.71068	0.335396	0.999981	8.04017	5.77582	4.20413	7.20994	3.16678	1.96615	11.1662	9.27514	5.76129	3.60827	2.43445	2.91853
Ash1l	5.66786	0.145446	0.533813	2.87196	0.719718	0.999981	9.6482	7.42605	4.20413	4.80663	2.37508	3.9323	5.9115	7.58875	5.76129	5.41241	3.65168	7.29633
Ash2l	14.6779	-0.144103	0.348715	1.09914	0.954179	0.999981	18.4924	17.3275	11.211	20.8287	15.8339	7.8646	15.1072	13.4911	12.9629	9.92275	17.0412	16.0519
Asl	21.0884	0.129869	0.29593	2.56509	0.766663	0.999981	21.7085	16.5023	18.9186	20.8287	20.584	19.6615	19.0482	15.1775	37.4484	22.5517	15.8239	24.8075
Asnsd1	21.2619	0.0665246	0.29269	2.37905	0.79459	0.999981	24.1205	17.3275	21.0206	19.2265	25.3342	15.7292	13.7935	19.3935	28.8064	20.7476	29.2134	20.4297
Aspscr1	15.0285	0.193392	0.331054	1.16539	0.948154	0.999981	13.6683	11.5516	17.5172	12.8177	13.4588	15.7292	17.0777	11.8047	17.2839	18.0414	18.2584	13.1334
Asrgl1	3.32584	0.719163	0.775889	4.82569	0.437522	0.999981	4.02008	3.30047	1.40138	3.20442	0.791694	0	5.25466	5.05916	5.76129	0.902068	0	10.2149
Asxl1	9.1748	-0.423945	0.428965	4.94029	0.42321	0.999981	8.04017	6.60094	11.211	13.6188	5.54186	19.6615	8.53883	5.05916	10.0823	8.11861	4.8689	8.7556
Asxl2	7.39405	-0.288354	0.504398	0.893151	0.970715	0.999981	6.43213	7.42605	10.5103	4.00552	12.6671	7.8646	5.25466	9.27514	7.20161	8.11861	1.21723	8.7556
Atad1	20.4374	-0.0675822	0.300768	1.98742	0.850882	0.999981	15.2763	17.3275	25.2248	15.221	23.7508	31.4584	24.9597	19.3935	21.6048	16.2372	15.8239	18.9705
Atad2	7.65214	0.408708	0.470048	7.66139	0.175911	0.999981	8.04017	9.90141	7.00688	7.20994	4.75016	1.96615	17.0777	10.9615	7.20161	9.92275	4.8689	2.91853
Atad2b	2.99681	-0.784924	0.753655	1.69384	0.889675	0.999981	3.21607	4.9507	5.6055	0.801105	4.75016	3.9323	3.28416	0.843194	2.88064	1.80414	2.43445	1.45927
Atad3a	6.06185	0.0674989	0.560206	3.87117	0.568109	0.999981	4.8241	10.7265	7.00688	1.60221	5.54186	5.89845	12.4798	8.43194	4.32097	6.31447	1.21723	4.3778
Ate1	11.2237	-0.223758	0.386051	0.686609	0.983696	0.999981	16.8844	8.25117	11.211	13.6188	12.6671	9.83075	9.85249	11.8047	8.64193	11.7269	8.52058	11.6741
Atf1	18.084	0.30854	0.321984	1.68725	0.890502	0.999981	13.6683	19.8028	15.4151	21.6298	19.0007	5.89845	15.1072	24.4526	23.0452	17.1393	17.0412	24.8075
Atf2	8.31879	-0.468126	0.454223	2.32857	0.802061	0.999981	8.04017	4.9507	12.6124	8.01105	11.0837	13.7631	5.9115	5.90236	5.76129	9.92275	3.65168	10.2149
Atf5	34.7184	0.383764	0.238274	4.23431	0.516197	0.999981	22.5125	21.453	28.7282	32.0442	37.2096	41.2892	28.2438	36.2573	51.8516	43.2993	40.1684	33.5631
Atf6	13.5259	0.284243	0.361773	1.04839	0.958569	0.999981	12.0603	9.90141	12.6124	12.0166	12.6671	13.7631	17.0777	18.5503	5.76129	18.9434	15.8239	13.1334
Atf6b	21.4687	-0.123165	0.288287	3.15797	0.675646	0.999981	23.3165	18.1526	19.6193	28.0387	25.3342	17.6954	19.0482	15.1775	15.8435	18.9434	31.6479	24.8075
Atf7	6.65691	0.237408	0.507579	8.09477	0.151089	0.999981	3.21607	4.12559	5.6055	8.81215	10.292	3.9323	7.22516	3.37278	4.32097	9.02068	17.0412	2.91853
Atf7ip	7.98887	-0.234393	0.44572	2.23298	0.816058	0.999981	8.84418	5.77582	5.6055	9.61326	10.292	11.7969	7.22516	5.90236	5.76129	6.31447	8.52058	10.2149
Atg10	4.10014	0.432862	0.634206	2.69214	0.74732	0.999981	4.02008	6.60094	1.40138	4.00552	1.58339	3.9323	5.25466	7.58875	4.32097	2.7062	4.8689	2.91853
Atg101	10.5474	0.46721	0.389243	0.736815	0.980887	0.999981	8.04017	9.07629	10.5103	8.81215	7.12524	9.83075	10.5093	11.8047	15.8435	12.6289	12.1723	10.2149
Atg12	34.7229	0.126067	0.232764	3.77101	0.582833	0.999981	32.1607	23.9284	27.3268	39.2541	34.0428	43.2553	27.587	36.2573	28.8064	40.5931	42.6029	40.8595
Atg13	16.1365	0.017449	0.3271	3.07481	0.688453	0.999981	16.0803	9.07629	16.8165	20.8287	14.2505	19.6615	13.1367	12.6479	24.4855	16.2372	15.8239	14.5927
Atg14	5.34132	-0.0139488	0.567442	2.97294	0.704158	0.999981	7.23615	2.47535	2.80275	5.60773	7.91694	5.89845	5.9115	9.27514	1.44032	3.60827	6.08613	5.83707
Atg16l1	9.05413	-0.715292	0.459736	1.0075	0.961958	0.999981	7.23615	8.25117	14.0138	12.8177	12.6671	11.7969	7.882	10.1183	5.76129	1.80414	6.08613	10.2149
Atg16l2	3.75599	-0.0629497	0.650153	1.18355	0.946446	0.999981	4.02008	4.12559	3.50344	6.40884	4.75016	0	2.62733	4.21597	2.88064	4.51034	3.65168	4.3778
Atg2a	10.0707	-0.426286	0.444335	8.08692	0.15151	0.999981	12.0603	5.77582	10.5103	8.01105	13.4588	15.7292	2.62733	1.68639	11.5226	11.7269	14.6067	13.1334
Atg2b	2.9891	0.366049	0.770103	3.78202	0.581206	0.999981	2.41205	0.825117	0.700688	4.00552	5.54186	1.96615	4.59783	2.52958	1.44032	0.902068	3.65168	7.29633
Atg3	26.6533	0.251906	0.259846	0.664806	0.984844	0.999981	26.5326	26.4037	22.422	21.6298	28.501	19.6615	25.6165	32.8846	24.4855	34.2786	26.779	30.6446
Atg4a	6.06327	0.476946	0.545582	3.71502	0.591131	0.999981	1.60803	3.30047	4.20413	4.80663	4.75016	13.7631	10.5093	5.90236	4.32097	4.51034	4.8689	10.2149
Atg4b	13.9453	0.0545376	0.351162	2.2867	0.808218	0.999981	13.6683	12.3768	8.40825	16.8232	14.2505	15.7292	14.4503	12.6479	11.5226	9.02068	19.4756	18.9705
Atg4c	4.99205	0.103583	0.59839	0.975532	0.964515	0.999981	6.43213	0.825117	4.90482	4.00552	6.33355	7.8646	5.9115	5.90236	7.20161	5.41241	3.65168	1.45927
Atg4d	5.53621	0.357953	0.541753	2.32156	0.803095	0.999981	4.02008	3.30047	6.30619	9.61326	3.95847	1.96615	3.941	6.74555	7.20161	7.21654	4.8689	7.29633
Atg5	14.047	-0.0593147	0.347164	4.21028	0.519555	0.999981	8.04017	11.5516	17.5172	12.8177	15.8339	21.6277	10.5093	10.9615	20.1645	10.8248	17.0412	11.6741
Atg7	23.1523	0.20843	0.274131	2.42144	0.788276	0.999981	18.4924	21.453	23.1227	22.4309	26.9176	15.7292	19.705	32.0414	21.6048	22.5517	30.4306	23.3483
Atg9a	8.65283	-0.354186	0.439278	1.42374	0.921698	0.999981	8.04017	9.90141	8.40825	8.81215	11.0837	11.7969	7.882	4.21597	5.76129	9.92275	12.1723	5.83707
Atic	12.6086	-0.118489	0.382717	3.04577	0.692929	0.999981	8.84418	14.027	15.4151	16.8232	7.91694	15.7292	19.0482	15.1775	10.0823	9.02068	6.08613	13.1334
Atl2	7.80846	0.227978	0.462531	5.33997	0.375813	0.999981	10.4522	9.90141	5.6055	2.40331	11.0837	3.9323	9.85249	7.58875	7.20161	4.51034	10.955	10.2149
Atl3	27.6287	-0.0646285	0.264578	5.3582	0.373745	0.999981	25.7285	22.2782	17.5172	42.4585	35.6262	27.5261	24.3028	26.9822	24.4855	25.2579	38.9512	20.4297
Atmin	7.65412	0.0677715	0.461938	3.50081	0.623265	0.999981	6.43213	5.77582	4.90482	10.4144	8.70863	7.8646	4.59783	4.21597	8.64193	10.8248	12.1723	7.29633
Atn1	11.2322	-0.394942	0.390412	2.25885	0.812292	0.999981	13.6683	11.5516	9.10894	14.4199	15.8339	9.83075	9.19566	5.90236	7.20161	10.8248	9.7378	17.5112
Atp11a	11.4566	-0.188128	0.394955	8.9718	0.110194	0.999981	12.8643	9.07629	14.7144	8.01105	5.54186	23.5938	7.22516	10.1183	18.7242	10.8248	3.65168	13.1334
Atp11b	5.7713	0.497805	0.543539	0.497555	0.992213	0.999981	6.43213	3.30047	2.80275	4.80663	7.12524	3.9323	6.56833	8.43194	10.0823	3.60827	4.8689	7.29633
Atp11c	3.02754	0.24336	0.771766	0.647178	0.985741	0.999981	3.21607	1.65023	0.700688	4.00552	5.54186	1.96615	3.28416	4.21597	4.32097	4.51034	0	2.91853
Atp13a1	13.2878	0.0137823	0.347552	0.518201	0.991442	0.999981	14.4723	11.5516	12.6124	13.6188	15.0422	11.7969	13.1367	10.9615	14.4032	15.3352	13.3895	13.1334
Atp13a3	13.995	-0.0535975	0.345664	6.90236	0.228004	0.999981	19.2964	14.8521	16.8165	9.61326	8.70863	15.7292	20.3618	15.1775	12.9629	10.8248	6.08613	17.5112
Atp1a3	20.0348	0.542723	0.301233	1.40166	0.924132	0.999981	24.9245	18.1526	14.0138	12.0166	13.4588	15.7292	22.3323	22.7662	27.3661	20.7476	25.5617	23.3483
Atp1b3	104.72	-0.153478	0.15259	3.96368	0.554656	0.999981	103.718	127.893	97.3956	109.751	117.171	104.206	95.2408	102.87	79.2177	96.5213	127.809	94.8523
Atp2a3	10.3666	0.0551141	0.42314	3.27833	0.657161	0.999981	13.6683	4.9507	10.5103	12.8177	7.91694	11.7969	15.1072	14.3343	8.64193	14.4331	7.30335	2.91853
Atp2b1	39.2648	-0.223792	0.218445	6.69392	0.244417	0.999981	34.5727	28.054	45.5447	44.0608	50.6684	51.1199	27.587	28.6686	44.65	31.5724	43.8201	40.8595
Atp2c1	12.2023	-0.318842	0.383219	2.3598	0.797446	0.999981	11.2562	10.7265	16.8165	10.4144	19.7923	11.7969	9.85249	5.90236	8.64193	17.1393	10.955	13.1334
Atp5a1	150.567	0.0535704	0.13345	2.97507	0.703829	0.999981	160.803	147.696	159.757	153.011	136.171	129.766	169.463	151.775	161.316	156.96	154.588	125.497
Atp5b	202.235	-0.100638	0.127997	1.66535	0.893235	0.999981	196.18	205.454	212.308	218.702	196.34	228.073	213.471	205.739	200.205	203.867	158.239	188.245
Atp5c1	91.1409	0.103809	0.15819	2.96024	0.706116	0.999981	92.4619	99.8392	95.2936	88.9226	70.4608	80.6122	93.9271	94.4377	109.464	100.13	86.423	81.7189
Atp5d	76.6069	-0.0809924	0.182168	3.08916	0.686242	0.999981	82.0097	84.1619	70.0688	83.3149	70.4608	82.5783	87.3588	93.5946	74.8967	64.0468	81.5541	45.2373
Atp5e	157.871	0.119662	0.138861	1.27077	0.937911	0.999981	134.271	152.647	165.362	145.801	159.13	153.36	168.806	159.364	162.756	188.532	171.629	132.793
Atp5g2	93.3558	0.214848	0.158981	2.38863	0.793166	0.999981	87.6378	80.8615	77.7764	92.9281	91.8365	88.4768	120.857	103.713	82.0984	109.15	97.378	87.556
Atp5g3	123.23	0.0521543	0.144273	7.17455	0.207979	0.999981	134.271	142.745	127.525	120.967	110.837	88.4768	135.308	139.97	141.152	135.31	98.5953	103.608
Atp5h	116.206	0.100355	0.144146	0.266397	0.998228	0.999981	112.562	107.265	119.117	111.354	106.087	117.969	120.2	124.793	122.427	121.779	115.636	115.282
Atp5j	102.514	-0.0928717	0.162506	2.13315	0.830431	0.999981	102.11	119.642	133.131	108.149	77.586	96.3414	103.78	93.5946	95.0613	98.3254	97.378	105.067
Atp5j2	129.773	0.151832	0.139011	4.77926	0.443409	0.999981	142.311	136.969	126.825	120.967	102.92	108.138	155.013	147.559	142.592	132.604	121.723	119.66
Atp5k	87.027	0.0564208	0.16291	6.53656	0.25745	0.999981	96.482	89.1126	86.8853	92.127	74.4192	72.7476	113.632	104.556	77.7774	94.7171	79.1197	62.7485
Atp5l	194.804	0.171634	0.128057	5.16225	0.396402	0.999981	217.085	189.777	201.798	182.652	167.047	141.563	212.157	210.799	214.608	232.734	192.322	175.112
Atp5md	101.426	0.0396705	0.150502	0.938522	0.96737	0.999981	98.8941	105.615	111.409	93.7292	98.17	92.4091	103.78	100.34	112.345	102.836	99.8125	97.7709
Atp5o	87.4953	0.16755	0.160001	3.79674	0.579035	0.999981	83.6177	90.7629	88.9874	84.9171	72.8358	72.7476	97.8681	113.831	90.7403	97.4233	73.0335	83.1782
Atp5pb	113.72	0.00899991	0.14591	0.36906	0.996139	0.999981	108.542	122.117	112.811	111.354	110.837	116.003	122.171	118.89	112.345	112.758	113.202	103.608
Atp6ap1	117.084	0.0942755	0.162802	0.466671	0.993293	0.999981	104.522	89.1126	117.015	116.16	117.171	141.563	130.053	129.852	112.345	123.583	130.243	93.3931
Atp6ap2	85.083	0.0773642	0.172962	1.23318	0.941655	0.999981	71.5575	92.4131	81.2798	87.3204	87.0863	76.6799	102.466	89.3786	92.1806	95.6192	63.2957	81.7189
Atp6v0a2	13.4839	0.197389	0.35101	0.528492	0.991043	0.999981	13.6683	14.8521	12.6124	14.4199	9.50033	9.83075	13.1367	13.4911	11.5226	17.1393	17.0412	14.5927
Atp6v0b	154.719	0.155813	0.143456	3.88132	0.566627	0.999981	158.391	165.023	178.675	121.768	117.171	141.563	156.983	173.698	175.719	157.862	174.063	135.712
Atp6v0c	727.463	0.114307	0.0996758	0.972475	0.964755	0.999981	629.545	697.224	733.62	731.409	691.149	709.78	743.535	707.44	736.005	766.758	793.631	789.463
Atp6v0d1	106.787	0.143417	0.151286	0.287579	0.99787	0.999981	101.306	108.915	100.899	95.3315	97.3783	106.172	124.798	103.713	108.024	119.073	110.768	105.067
Atp6v0e	148.637	0.0872525	0.137752	1.01452	0.961386	0.999981	137.487	160.898	131.729	133.784	155.964	145.495	136.621	157.677	164.197	161.47	150.936	147.386
Atp6v0e2	14.2565	0.0346302	0.338348	2.19327	0.821808	0.999981	19.2964	15.6772	13.3131	13.6188	12.6671	9.83075	18.3913	14.3343	12.9629	17.1393	12.1723	11.6741
Atp6v1a	188.152	0.302018	0.126293	6.62388	0.250149	0.999981	138.291	159.248	163.26	164.226	199.507	186.784	191.138	187.189	191.563	192.14	249.531	234.942
Atp6v1b2	132.892	0.337061	0.156158	6.06462	0.299982	0.999981	91.6579	109.741	145.042	133.784	108.462	112.071	132.023	106.242	133.95	175.001	164.325	182.408
Atp6v1c1	99.8391	0.410442	0.153204	0.901689	0.970099	0.999981	80.4017	80.8615	88.2867	87.3204	82.3362	96.3414	112.318	118.89	103.703	124.485	103.464	119.66
Atp6v1d	60.2787	-0.115447	0.186602	4.63279	0.462315	0.999981	59.4972	63.534	46.2454	76.1049	71.2524	58.9845	47.9488	69.1419	48.971	56.8303	69.3819	55.4521
Atp6v1e1	107.655	0.168721	0.156253	3.89742	0.564278	0.999981	104.522	124.593	122.62	86.5193	89.4614	82.5783	133.994	116.361	109.464	110.052	109.55	102.149
Atp6v1f	143.525	-0.0621389	0.142992	2.97458	0.703904	0.999981	127.839	150.996	168.165	136.188	132.213	167.123	127.426	135.754	154.114	168.687	125.374	128.415
Atp6v1g1	168.719	0.271064	0.136007	6.47055	0.263085	0.999981	169.648	179.876	151.349	144.199	142.505	127.8	181.943	219.23	203.085	208.378	144.85	151.764
Atp6v1h	62.7345	0.253739	0.199989	2.53732	0.770864	0.999981	60.3013	77.561	49.7488	44.8619	47.5016	64.883	70.2811	61.5532	67.6951	87.5006	52.3407	68.5855
Atp8a1	7.35603	-0.0168617	0.473251	4.13979	0.52947	0.999981	5.62812	3.30047	4.90482	9.61326	11.8754	9.83075	4.59783	7.58875	4.32097	8.11861	9.7378	8.7556
Atp8b2	5.28368	0.0808104	0.563396	1.80722	0.875125	0.999981	4.8241	3.30047	3.50344	7.20994	10.292	1.96615	5.9115	3.37278	5.76129	6.31447	3.65168	7.29633
Atp8b4	12.1796	-0.271874	0.373204	2.57009	0.765905	0.999981	16.0803	6.60094	14.7144	10.4144	15.8339	17.6954	12.4798	9.27514	14.4032	9.92275	8.52058	10.2149
Atp9b	14.859	0.075822	0.342892	2.17606	0.824287	0.999981	20.9044	10.7265	11.9117	14.4199	16.6256	11.7969	16.4208	20.2367	8.64193	13.531	17.0412	16.0519
Atpaf1	7.31203	-0.0993896	0.487503	2.81469	0.728529	0.999981	8.84418	4.9507	7.00688	6.40884	8.70863	7.8646	5.25466	7.58875	1.44032	6.31447	14.6067	8.7556
Atpaf2	7.10985	0.267715	0.483313	1.22917	0.942048	0.999981	11.2562	7.42605	3.50344	5.60773	7.12524	3.9323	7.882	7.58875	10.0823	6.31447	7.30335	7.29633
Atpif1	160.873	0.159048	0.134205	5.76629	0.329628	0.999981	167.235	185.651	136.634	154.613	126.671	143.529	190.482	194.778	161.316	164.176	166.76	138.63
Atpsckmt	5.56055	0.21175	0.554464	3.17187	0.673509	0.999981	8.84418	3.30047	9.10894	4.80663	1.58339	3.9323	3.941	6.74555	7.20161	6.31447	3.65168	7.29633
Atraid	43.1179	0.0764038	0.214023	1.93388	0.858216	0.999981	47.437	42.9061	41.3406	33.6464	42.7515	43.2553	42.0373	42.1597	37.4484	41.4951	62.0785	40.8595
Atrn	4.14875	-0.255655	0.67285	2.86842	0.720263	0.999981	3.21607	3.30047	5.6055	7.20994	3.95847	1.96615	7.882	0.843194	0	6.31447	3.65168	5.83707
Atrx	9.61368	-0.19	0.435853	1.65885	0.894042	0.999981	8.84418	9.90141	6.30619	16.8232	11.0837	7.8646	11.823	5.05916	8.64193	5.41241	13.3895	10.2149
Atxn1	6.67802	0.132328	0.52801	2.21458	0.818728	0.999981	11.2562	2.47535	3.50344	7.20994	8.70863	5.89845	7.22516	6.74555	11.5226	9.02068	3.65168	2.91853
Atxn10	34.7053	0.354145	0.234382	1.46656	0.916896	0.999981	27.3366	35.48	33.633	34.4475	21.3757	31.4584	46.6351	38.7869	38.8887	35.1806	35.2995	37.9409
Atxn1l	8.49042	0.0255084	0.446868	1.08061	0.955806	0.999981	11.2562	8.25117	7.00688	11.2155	5.54186	5.89845	8.53883	5.90236	11.5226	6.31447	7.30335	13.1334
Atxn2	8.12241	-0.0221279	0.47356	2.3074	0.805179	0.999981	11.2562	9.07629	4.20413	7.20994	7.91694	7.8646	10.5093	3.37278	11.5226	3.60827	12.1723	8.7556
Atxn2l	23.6507	-0.00125925	0.273875	0.571641	0.989265	0.999981	20.1004	26.4037	19.6193	20.0276	26.1259	31.4584	22.9892	23.6094	27.3661	22.5517	23.1273	20.4297
Atxn3	9.79674	0.135347	0.418107	2.43093	0.786859	0.999981	10.4522	9.07629	11.9117	5.60773	10.292	7.8646	17.7345	6.74555	7.20161	9.02068	8.52058	13.1334
Atxn7	3.26069	0.047959	0.71558	5.5381	0.353786	0.999981	4.8241	3.30047	1.40138	0.801105	4.75016	3.9323	2.62733	5.90236	1.44032	0.902068	4.8689	4.3778
Atxn7l1	6.06499	-0.230346	0.522186	0.866522	0.972598	0.999981	5.62812	4.12559	5.6055	8.81215	8.70863	5.89845	6.56833	4.21597	7.20161	3.60827	3.65168	8.7556
Atxn7l3	10.8669	-0.252837	0.397209	0.717967	0.981968	0.999981	13.6683	9.07629	14.0138	10.4144	11.0837	11.7969	6.56833	9.27514	7.20161	14.4331	9.7378	13.1334
Atxn7l3b	12.03	0.0987892	0.380234	1.42328	0.921749	0.999981	14.4723	15.6772	11.211	8.01105	11.8754	7.8646	11.1662	10.1183	20.1645	12.6289	10.955	10.2149
AU020206	20.4746	0.116046	0.309414	5.38064	0.371212	0.999981	31.3567	14.027	18.2179	20.0276	14.2505	19.6615	24.9597	20.2367	37.4484	15.3352	17.0412	13.1334
AU022793	3.93642	0.674676	0.688156	2.67585	0.74981	0.999981	3.21607	3.30047	4.90482	0.801105	0.791694	5.89845	1.9705	4.21597	10.0823	4.51034	6.08613	1.45927
AU040320	6.97183	0.526188	0.505584	1.71964	0.886416	0.999981	2.41205	6.60094	4.20413	10.4144	7.12524	3.9323	7.22516	6.74555	14.4032	7.21654	6.08613	7.29633
Auh	7.60012	0.0518487	0.488537	6.62642	0.249939	0.999981	9.6482	6.60094	4.20413	3.20442	7.91694	11.7969	7.22516	2.52958	11.5226	2.7062	12.1723	11.6741
Aup1	70.0377	0.0397606	0.175709	0.400596	0.995313	0.999981	61.9093	72.6103	65.8647	76.1049	71.2524	66.8491	76.1926	77.5739	69.1355	61.3406	73.0335	68.5855
Aurka	3.01983	0.381631	0.743498	5.91273	0.314803	0.999981	5.62812	3.30047	0.700688	4.00552	2.37508	0	5.9115	5.05916	1.44032	2.7062	3.65168	1.45927
Aurkaip1	45.4258	0.0512449	0.208882	1.04633	0.958743	0.999981	41.0049	47.0317	42.0413	40.0552	44.3349	53.0861	44.0078	37.1005	59.0532	44.2013	45.0373	48.1558
Aven	5.14872	0.695573	0.584529	2.75106	0.738299	0.999981	0.804017	8.25117	3.50344	6.40884	3.95847	1.96615	5.25466	5.90236	8.64193	5.41241	7.30335	4.3778
Avl9	6.877	-0.157287	0.496036	1.71077	0.88754	0.999981	11.2562	6.60094	4.90482	5.60773	10.292	3.9323	4.59783	5.05916	4.32097	7.21654	8.52058	10.2149
Avpi1	3.78312	-0.254962	0.654313	2.25849	0.812344	0.999981	2.41205	5.77582	2.80275	7.20994	4.75016	1.96615	2.62733	3.37278	5.76129	3.60827	3.65168	1.45927
AW209491	3.47928	0.0689898	0.722901	2.74666	0.738973	0.999981	2.41205	4.12559	4.20413	2.40331	3.16678	1.96615	7.22516	1.68639	2.88064	0	7.30335	4.3778
AW549877	9.86401	0.215052	0.419323	3.76459	0.583783	0.999981	6.43213	12.3768	7.70757	9.61326	12.6671	3.9323	7.22516	11.8047	7.20161	6.31447	17.0412	16.0519
Axin1	9.39197	-0.197472	0.422262	1.21086	0.943831	0.999981	11.2562	4.9507	9.10894	12.0166	13.4588	9.83075	7.882	8.43194	8.64193	10.8248	6.08613	10.2149
Azi2	14.5173	-0.3058	0.346635	5.64824	0.341964	0.999981	13.6683	10.7265	16.1158	19.2265	19.7923	15.7292	16.4208	5.05916	10.0823	16.2372	19.4756	11.6741
B230219D22Rik	12.0469	-0.0207808	0.371524	4.46767	0.484221	0.999981	16.8844	15.6772	11.211	9.61326	8.70863	9.83075	15.1072	15.1775	15.8435	6.31447	8.52058	11.6741
B230307C23Rik	7.3389	-0.106223	0.474084	0.949064	0.966569	0.999981	7.23615	8.25117	7.70757	9.61326	7.91694	3.9323	9.19566	3.37278	5.76129	9.02068	7.30335	8.7556
B3galnt1	12.0425	0.21647	0.370174	1.90585	0.862013	0.999981	12.8643	14.027	9.10894	13.6188	7.12524	9.83075	15.764	15.1775	11.5226	9.92275	10.955	14.5927
B3galt4	4.56429	0.525857	0.589814	1.80771	0.87506	0.999981	4.02008	4.12559	2.80275	2.40331	3.16678	5.89845	5.9115	5.90236	7.20161	3.60827	2.43445	7.29633
B3galt6	3.30849	1.50881	0.765246	0.52328	0.991246	0.999981	2.41205	1.65023	3.50344	2.40331	0	0	3.28416	4.21597	2.88064	4.51034	6.08613	8.7556
B3gat3	16.8526	0.00202123	0.321945	3.63594	0.602926	0.999981	21.7085	13.2019	14.0138	20.0276	19.0007	11.7969	18.3913	9.27514	21.6048	22.5517	14.6067	16.0519
B3gnt2	16.3916	-0.189273	0.327358	6.22207	0.285206	0.999981	12.0603	14.8521	12.6124	18.4254	24.5425	21.6277	15.764	9.27514	11.5226	11.7269	26.779	17.5112
B3gnt3	10.3625	0.278328	0.414982	1.63757	0.89667	0.999981	7.23615	4.9507	9.80963	12.8177	11.8754	9.83075	11.1662	14.3343	4.32097	11.7269	14.6067	11.6741
B3gnt8	10.7374	-0.555637	0.415702	5.51633	0.356159	0.999981	16.8844	5.77582	9.10894	16.8232	12.6671	15.7292	17.0777	9.27514	4.32097	9.02068	4.8689	7.29633
B430306N03Rik	20.0267	0.344573	0.328039	8.44408	0.133401	0.999981	19.2964	11.5516	29.4289	28.8398	9.50033	7.8646	13.7935	13.4911	25.9258	29.7682	30.4306	20.4297
B4galnt1	15.7259	-0.238899	0.352258	7.74021	0.171147	0.999981	19.2964	8.25117	11.211	17.6243	24.5425	19.6615	11.823	15.1775	8.64193	7.21654	29.2134	16.0519
B4galt1	48.84	-0.135776	0.213728	7.74453	0.170889	0.999981	70.7535	52.8075	42.0413	37.6519	55.4186	49.1538	61.0855	63.2396	47.5306	42.3972	37.734	26.2668
B4galt3	4.17573	-0.450999	0.654408	1.54657	0.907634	0.999981	2.41205	4.12559	7.00688	6.40884	6.33355	1.96615	3.941	4.21597	7.20161	0.902068	1.21723	4.3778
B4galt4	3.49673	-0.326557	0.744884	1.65867	0.894065	0.999981	0.804017	2.47535	2.80275	4.80663	3.16678	11.7969	3.28416	4.21597	2.88064	4.51034	1.21723	0
B4galt5	38.2578	-0.316505	0.225156	3.65603	0.599921	0.999981	25.7285	50.3321	46.2454	41.6574	41.9598	51.1199	29.5575	34.571	41.7693	33.3765	29.2134	33.5631
B4galt6	37.2071	0.184922	0.236726	2.1093	0.833824	0.999981	27.3366	36.3052	37.8371	43.2597	37.2096	25.56	35.469	53.9644	41.7693	27.9641	38.9512	40.8595
B4galt7	19.4299	0.512107	0.306536	4.82464	0.437654	0.999981	23.3165	21.453	16.1158	7.20994	15.8339	13.7631	31.528	21.923	21.6048	20.7476	20.6928	18.9705
B4gat1	4.13791	-0.234532	0.666552	3.91146	0.562233	0.999981	1.60803	4.12559	1.40138	5.60773	4.75016	9.83075	7.882	1.68639	1.44032	4.51034	2.43445	4.3778
B9d2	7.88261	-0.433622	0.47109	3.04575	0.692933	0.999981	6.43213	8.25117	8.40825	8.81215	6.33355	15.7292	7.22516	1.68639	5.76129	7.21654	8.52058	10.2149
Babam1	24.3272	0.336056	0.271906	0.976675	0.964425	0.999981	20.9044	20.6279	22.422	20.8287	18.209	27.5261	34.1553	25.2958	25.9258	32.4744	23.1273	20.4297
Babam2	20.5838	0.0122224	0.298413	2.65018	0.753727	0.999981	18.4924	26.4037	11.9117	21.6298	19.0007	25.56	21.6755	15.1775	17.2839	18.0414	25.5617	26.2668
Bach1	29.0581	-0.25161	0.261226	5.29256	0.381228	0.999981	17.6884	27.2289	28.7282	43.2597	37.2096	35.3907	22.9892	20.2367	24.4855	21.6496	30.4306	39.4002
Bad	18.5662	0.211686	0.308585	1.04262	0.959056	0.999981	20.1004	14.027	16.1158	12.0166	18.209	23.5938	15.1072	18.5503	18.7242	22.5517	21.9101	21.889
Bag1	63.7872	-0.0183678	0.184609	2.82311	0.727234	0.999981	65.1254	51.1573	72.8715	69.6961	53.0435	74.7137	66.3401	51.4348	53.2919	71.2634	69.3819	67.1263
Bag3	21.8397	0.0548867	0.284695	5.34419	0.375334	0.999981	22.5125	23.9284	33.633	20.8287	11.8754	17.6954	24.9597	25.2958	24.4855	22.5517	18.2584	16.0519
Bag4	5.89254	0.330854	0.559019	1.94115	0.857227	0.999981	7.23615	1.65023	4.90482	6.40884	4.75016	5.89845	9.19566	6.74555	7.20161	0.902068	8.52058	7.29633
Bag5	9.13125	0.0830792	0.448639	0.27909	0.998018	0.999981	10.4522	9.07629	14.0138	8.81215	4.75016	5.89845	9.85249	10.1183	4.32097	7.21654	13.3895	11.6741
Bag6	38.7477	0.0591698	0.22112	3.30013	0.653821	0.999981	33.7687	45.3814	41.3406	30.442	40.3764	35.3907	38.7531	38.7869	37.4484	28.8662	53.5579	40.8595
Bahd1	11.6101	0.370461	0.372178	1.57437	0.904332	0.999981	9.6482	9.90141	9.10894	13.6188	10.292	7.8646	11.1662	12.6479	14.4032	18.0414	10.955	11.6741
Baiap2	21.466	-0.0397958	0.298177	7.79085	0.168145	0.999981	24.1205	12.3768	13.3131	20.8287	35.6262	25.56	18.3913	16.8639	24.4855	14.4331	34.0823	17.5112
Bak1	50.9864	0.0476343	0.202041	3.43673	0.632981	0.999981	45.0249	44.5563	63.0619	64.0884	45.1265	39.323	57.1445	53.1212	53.2919	56.8303	37.734	52.5336
Bap1	11.4489	-0.0849307	0.383962	4.19374	0.521873	0.999981	12.8643	15.6772	15.4151	10.4144	8.70863	7.8646	13.1367	12.6479	11.5226	16.2372	8.52058	4.3778
Bax	94.1797	0.0340285	0.161071	0.351753	0.996555	0.999981	92.4619	102.315	86.8853	101.74	91.0448	82.5783	102.466	88.5354	108.024	84.7944	97.378	91.9338
Baz1a	4.1971	0.215453	0.616072	1.00931	0.961812	0.999981	4.8241	4.12559	4.20413	1.60221	7.12524	1.96615	4.59783	5.05916	4.32097	4.51034	3.65168	4.3778
Baz1b	16.473	0.0186933	0.329616	3.39951	0.638645	0.999981	23.3165	9.90141	21.7213	16.8232	18.209	7.8646	18.3913	11.8047	14.4032	15.3352	19.4756	20.4297
Baz2a	10.5917	-0.442001	0.421609	8.47007	0.132161	0.999981	9.6482	9.07629	13.3131	20.8287	14.2505	3.9323	4.59783	5.05916	12.9629	8.11861	19.4756	5.83707
Baz2b	5.29092	-0.309053	0.547794	0.856687	0.973278	0.999981	7.23615	4.12559	4.20413	6.40884	5.54186	7.8646	5.25466	5.90236	2.88064	3.60827	6.08613	4.3778
Bbip1	12.3676	0.155998	0.369221	3.12682	0.680442	0.999981	6.43213	9.07629	13.3131	10.4144	11.8754	21.6277	10.5093	10.1183	14.4032	15.3352	12.1723	13.1334
Bbx	11.9982	-0.347838	0.377023	5.08237	0.405911	0.999981	9.6482	7.42605	12.6124	21.6298	14.2505	15.7292	7.22516	7.58875	15.8435	13.531	9.7378	8.7556
BC003965	10.2842	-0.0786539	0.407206	2.62768	0.757155	0.999981	11.2562	9.90141	8.40825	12.0166	14.2505	5.89845	11.823	5.05916	10.0823	7.21654	15.8239	11.6741
BC004004	45.3622	0.257612	0.203898	1.25258	0.939735	0.999981	42.6129	39.6056	47.6468	33.6464	38.793	47.1876	50.5761	48.0621	53.2919	45.1034	51.1235	46.6965
BC005624	23.2332	0.219889	0.271242	3.60661	0.607321	0.999981	18.4924	15.6772	18.9186	28.0387	23.7508	23.5938	21.0187	21.0799	20.1645	27.9641	27.9962	32.1039
BC029722	15.4519	-3.94915e-05	0.350493	1.43817	0.920093	0.999981	15.2763	18.1526	16.1158	19.2265	11.0837	11.7969	17.0777	18.5503	10.0823	10.8248	25.5617	11.6741
BC031181	53.5467	0.103328	0.191705	5.78011	0.328207	0.999981	57.8892	56.9331	50.4495	60.0828	39.5847	45.2215	59.7718	65.7691	60.4935	63.1447	43.8201	39.4002
BC051226	3.10092	-1.30806	0.837439	6.05124	0.301265	0.999981	0	0.825117	2.80275	6.40884	8.70863	9.83075	1.31367	0.843194	1.44032	0.902068	1.21723	2.91853
Bcap29	19.9044	-0.00219851	0.306962	1.28892	0.936068	0.999981	20.9044	22.2782	21.7213	19.2265	19.7923	13.7631	23.646	22.7662	10.0823	25.2579	14.6067	24.8075
Bcap31	82.3159	0.0630204	0.167819	3.71592	0.590997	0.999981	71.5575	84.9871	72.1709	70.4972	87.878	94.3752	79.4768	64.926	77.7774	83.8923	93.7264	106.526
Bcas2	26.0173	0.0556205	0.272391	0.937646	0.967437	0.999981	19.2964	24.7535	25.9255	25.6353	29.2927	27.5261	30.2143	29.5118	23.0452	26.16	15.8239	35.0224
Bcas3	7.16051	0.0222425	0.489418	4.16058	0.526535	0.999981	4.8241	4.9507	2.80275	7.20994	12.6671	11.7969	9.19566	7.58875	4.32097	4.51034	7.30335	8.7556
Bcat2	23.3885	0.115911	0.285833	5.10148	0.403622	0.999981	20.1004	12.3768	26.6261	28.0387	15.8339	33.4246	19.0482	17.7071	25.9258	20.7476	31.6479	29.1853
Bccip	16.0753	0.0967971	0.326417	1.95937	0.854738	0.999981	14.4723	14.027	21.0206	20.0276	11.0837	11.7969	16.4208	14.3343	15.8435	17.1393	13.3895	23.3483
Bckdha	16.7026	-0.240859	0.328	6.92382	0.226368	0.999981	19.2964	12.3768	13.3131	18.4254	17.4173	25.56	13.7935	11.8047	5.76129	13.531	24.3445	24.8075
Bckdk	15.9768	-0.412926	0.335102	1.69028	0.890122	0.999981	19.2964	16.5023	14.7144	16.8232	19.0007	23.5938	13.7935	15.1775	10.0823	13.531	21.9101	7.29633
Bcl10	15.9097	-0.223593	0.33765	0.914953	0.96913	0.999981	16.0803	23.9284	17.5172	16.0221	17.4173	9.83075	11.1662	13.4911	17.2839	15.3352	10.955	21.889
Bcl2	3.05081	-1.19446	0.796711	4.50938	0.478629	0.999981	4.8241	4.12559	8.40825	2.40331	1.58339	3.9323	4.59783	1.68639	1.44032	3.60827	0	0
Bcl2a1d	6.56643	-0.70885	0.571181	5.04613	0.410277	0.999981	2.41205	13.2019	4.20413	7.20994	7.91694	13.7631	6.56833	10.1183	5.76129	1.80414	0	5.83707
Bcl2l11	24.2643	-0.0115165	0.274408	8.05308	0.153334	0.999981	23.3165	11.5516	22.422	24.0331	36.4179	29.4923	28.2438	16.0207	21.6048	18.9434	25.5617	33.5631
Bcl2l13	9.51851	-0.064186	0.411972	0.950984	0.966422	0.999981	8.84418	10.7265	9.80963	9.61326	10.292	7.8646	5.25466	9.27514	11.5226	10.8248	8.52058	11.6741
Bcl2l2	6.30414	0.244248	0.540074	3.90566	0.563078	0.999981	4.8241	7.42605	4.20413	4.00552	11.0837	1.96615	7.882	8.43194	10.0823	0.902068	6.08613	8.7556
Bcl6	13.6346	-0.0423671	0.349312	3.41741	0.635919	0.999981	16.0803	18.9777	15.4151	10.4144	10.292	11.7969	12.4798	17.7071	17.2839	14.4331	8.52058	10.2149
Bcl7b	17.5482	0.118467	0.309862	1.58917	0.902555	0.999981	16.0803	14.027	15.4151	15.221	22.9591	17.6954	13.7935	19.3935	17.2839	20.7476	21.9101	16.0519
Bcl7c	16.0593	0.305111	0.343336	0.79314	0.977469	0.999981	17.6884	14.027	14.0138	20.0276	7.12524	13.7631	19.705	17.7071	18.7242	11.7269	20.6928	17.5112
Bclaf1	15.1513	-0.0343269	0.352916	1.66788	0.892921	0.999981	14.4723	10.7265	18.2179	24.0331	15.8339	7.8646	13.1367	16.8639	17.2839	14.4331	8.52058	20.4297
Bcor	7.29606	-0.527505	0.477948	2.39412	0.79235	0.999981	8.84418	12.3768	9.10894	6.40884	7.12524	7.8646	9.85249	8.43194	2.88064	5.41241	4.8689	4.3778
Bdp1	4.25877	0.249796	0.622373	1.00836	0.961889	0.999981	6.43213	1.65023	6.30619	3.20442	2.37508	3.9323	2.62733	5.05916	5.76129	4.51034	4.8689	4.3778
Becn1	27.8548	-0.0772798	0.258604	2.19093	0.822146	0.999981	19.2964	28.8791	28.0275	36.8508	27.7093	31.4584	24.3028	27.8254	20.1645	25.2579	35.2995	29.1853
Bend4	3.34161	0.331284	0.699423	2.69927	0.746231	0.999981	0.804017	2.47535	4.90482	4.00552	3.95847	1.96615	1.9705	5.05916	1.44032	4.51034	6.08613	2.91853
Bet1	12.1859	0.214761	0.383588	1.47325	0.916136	0.999981	14.4723	11.5516	9.80963	9.61326	8.70863	11.7969	7.882	16.0207	17.2839	7.21654	15.8239	16.0519
Bet1l	9.31324	0.105531	0.428239	2.23612	0.815602	0.999981	4.8241	10.7265	9.10894	7.20994	8.70863	13.7631	10.5093	10.1183	10.0823	9.92275	3.65168	13.1334
Bex3	14.4528	0.424774	0.344908	5.88043	0.318028	0.999981	16.0803	16.5023	14.7144	8.01105	7.91694	11.7969	20.3618	22.7662	20.1645	14.4331	13.3895	7.29633
Bfar	7.98217	-0.349515	0.477718	1.7481	0.882785	0.999981	5.62812	16.5023	8.40825	8.01105	11.0837	3.9323	4.59783	4.21597	8.64193	9.92275	6.08613	8.7556
Bgn	7.4901	-1.7299	0.53099	1.60258	0.900937	0.999981	14.4723	7.42605	12.6124	13.6188	6.33355	13.7631	1.9705	3.37278	1.44032	2.7062	4.8689	7.29633
Bicd2	13.2693	-0.296394	0.365608	3.07084	0.689065	0.999981	12.0603	16.5023	20.3199	13.6188	13.4588	11.7969	17.7345	14.3343	12.9629	7.21654	13.3895	5.83707
Bicral	4.81119	-0.786765	0.599957	1.12197	0.952141	0.999981	4.8241	6.60094	4.20413	4.00552	8.70863	7.8646	3.28416	0.843194	5.76129	3.60827	3.65168	4.3778
Bid	24.1212	-0.363142	0.290798	4.53137	0.475697	0.999981	19.2964	35.48	26.6261	29.6409	25.3342	25.56	21.6755	17.7071	21.6048	38.7889	14.6067	13.1334
Bin2	16.538	-0.205458	0.325972	6.65825	0.247322	0.999981	15.2763	18.9777	12.6124	11.2155	19.7923	27.5261	16.4208	11.8047	12.9629	11.7269	10.955	29.1853
Bin3	16.9916	-0.0842203	0.327691	2.84129	0.724438	0.999981	11.2562	25.5786	11.211	22.4309	17.4173	17.6954	13.1367	18.5503	21.6048	15.3352	12.1723	17.5112
Birc2	4.78027	-0.696567	0.628763	3.42979	0.634037	0.999981	8.04017	4.12559	4.20413	5.60773	7.12524	3.9323	1.31367	1.68639	8.64193	2.7062	8.52058	1.45927
Birc3	7.45754	-0.943764	0.535747	4.72125	0.450838	0.999981	7.23615	18.1526	4.90482	11.2155	5.54186	9.83075	5.25466	5.05916	1.44032	0.902068	9.7378	10.2149
Birc6	11.3651	-0.211294	0.402566	1.7987	0.876238	0.999981	6.43213	14.027	12.6124	16.8232	15.0422	7.8646	11.823	5.90236	10.0823	15.3352	7.30335	13.1334
Bivm	4.26484	-0.376646	0.638273	2.24506	0.814302	0.999981	3.21607	6.60094	4.90482	3.20442	9.50033	1.96615	5.25466	1.68639	4.32097	5.41241	3.65168	1.45927
Blcap	20.4238	0.132786	0.296284	3.05809	0.69103	0.999981	19.2964	23.1033	11.9117	16.0221	18.209	29.4923	16.4208	21.0799	20.1645	18.0414	27.9962	23.3483
Blmh	14.4896	0.216658	0.346323	1.42545	0.921509	0.999981	11.2562	15.6772	17.5172	12.8177	10.292	13.7631	21.6755	16.0207	15.8435	14.4331	15.8239	8.7556
Blnk	48.002	0.397634	0.211035	1.38967	0.92544	0.999981	41.8089	37.1303	40.6399	32.8453	42.7515	57.0184	61.7423	59.8668	46.0903	50.5158	63.2957	42.3187
Bloc1s1	43.9017	0.00914172	0.216274	1.81053	0.874691	0.999981	50.6531	40.4307	41.3406	44.8619	34.8345	51.1199	39.41	48.0621	56.1726	49.6137	35.2995	35.0224
Bloc1s2	16.5961	-0.266731	0.329984	5.5068	0.357201	0.999981	17.6884	25.5786	14.7144	20.0276	13.4588	15.7292	13.7935	23.6094	4.32097	17.1393	17.0412	16.0519
Bloc1s3	6.55298	0.115427	0.525936	1.85362	0.869006	0.999981	7.23615	4.12559	6.30619	4.80663	5.54186	7.8646	1.9705	9.27514	2.88064	7.21654	9.7378	11.6741
Bloc1s4	10.729	0.339832	0.424032	2.80059	0.730696	0.999981	11.2562	18.9777	9.10894	8.01105	5.54186	3.9323	7.22516	13.4911	8.64193	12.6289	18.2584	11.6741
Bloc1s5	4.39221	0.215869	0.662509	6.00013	0.306206	0.999981	2.41205	4.12559	3.50344	4.80663	7.91694	0	8.53883	2.52958	2.88064	0.902068	12.1723	2.91853
Bloc1s6	26.0288	0.178536	0.289779	1.7077	0.887928	0.999981	13.6683	18.1526	24.5241	32.0442	22.1674	41.2892	34.1553	26.9822	23.0452	28.8662	25.5617	21.889
Blvra	57.6854	0.172048	0.193144	4.44429	0.487371	0.999981	55.4772	45.3814	46.9461	81.7127	45.1265	53.0861	55.174	63.2396	56.1726	69.4592	62.0785	58.3707
Blvrb	135.668	-0.108961	0.162596	7.77824	0.168888	0.999981	120.603	143.57	208.104	134.586	120.337	116.003	111.662	96.9673	154.114	115.465	167.977	138.63
Blzf1	4.20648	-0.795473	0.642502	0.559128	0.989798	0.999981	2.41205	3.30047	5.6055	6.40884	7.12524	7.8646	3.28416	4.21597	4.32097	1.80414	1.21723	2.91853
Bmi1	10.2934	-0.106351	0.399759	1.97044	0.853221	0.999981	8.84418	12.3768	9.10894	8.81215	9.50033	15.7292	9.19566	10.9615	4.32097	10.8248	12.1723	11.6741
Bmpr2	17.1668	0.0883785	0.313796	3.14584	0.677513	0.999981	16.0803	14.027	11.9117	18.4254	15.0422	25.56	22.3323	17.7071	11.5226	17.1393	15.8239	20.4297
Bms1	5.83568	0.191973	0.563382	4.07334	0.538906	0.999981	11.2562	4.12559	4.90482	4.00552	0.791694	9.83075	4.59783	8.43194	8.64193	5.41241	3.65168	4.3778
Bmt2	17.8846	-0.249268	0.313772	1.91714	0.860487	0.999981	14.4723	21.453	23.1227	12.8177	19.0007	27.5261	13.7935	13.4911	20.1645	17.1393	17.0412	14.5927
Bmyc	6.09671	0.38832	0.513769	0.66134	0.985023	0.999981	4.02008	3.30047	6.30619	7.20994	7.12524	3.9323	7.22516	7.58875	4.32097	6.31447	8.52058	7.29633
Bnip1	5.94113	0.321465	0.541538	1.27014	0.937974	0.999981	3.21607	4.9507	6.30619	3.20442	6.33355	7.8646	8.53883	2.52958	10.0823	9.02068	4.8689	4.3778
Bnip2	43.2282	-0.16834	0.218883	0.774206	0.978649	0.999981	45.0249	56.108	42.742	41.6574	46.7099	39.323	37.4395	32.8846	36.0081	40.5931	46.2546	53.9929
Bnip3	5.71379	-0.109663	0.536587	3.10338	0.684051	0.999981	8.04017	5.77582	5.6055	5.60773	7.91694	1.96615	7.882	4.21597	1.44032	7.21654	8.52058	4.3778
Bnip3l	50.5504	0.596343	0.201428	0.974005	0.964635	0.999981	41.8089	37.9554	43.4427	32.0442	45.9182	39.323	51.233	55.6508	63.3742	64.9489	60.8613	70.0448
Bod1	7.91714	-0.549409	0.467633	6.52647	0.258305	0.999981	11.2562	7.42605	8.40825	2.40331	9.50033	19.6615	8.53883	5.05916	5.76129	3.60827	6.08613	7.29633
Bod1l	4.56443	-0.0277666	0.626166	1.34209	0.930541	0.999981	4.8241	6.60094	2.80275	6.40884	6.33355	0	7.22516	2.52958	4.32097	1.80414	6.08613	5.83707
Bola1	9.41828	0.0199062	0.421368	2.98006	0.703061	0.999981	9.6482	7.42605	9.10894	7.20994	12.6671	9.83075	7.882	12.6479	10.0823	6.31447	15.8239	4.3778
Bola2	51.868	0.0972737	0.20334	8.27661	0.141636	0.999981	53.0651	56.9331	50.4495	47.2652	38.793	51.1199	70.938	63.2396	59.0532	53.222	24.3445	53.9929
Bola3	24.6904	0.346699	0.26596	3.1594	0.675427	0.999981	24.9245	26.4037	23.1227	23.232	15.8339	15.7292	28.9007	31.1982	27.3661	30.6703	18.2584	30.6446
Bop1	9.5433	0.192787	0.432351	2.77924	0.733975	0.999981	10.4522	5.77582	12.6124	6.40884	5.54186	13.7631	8.53883	15.1775	14.4032	9.92275	6.08613	5.83707
Borcs6	7.91776	-0.364717	0.462792	5.0968	0.404182	0.999981	9.6482	4.9507	5.6055	6.40884	12.6671	13.7631	5.9115	5.05916	4.32097	7.21654	4.8689	14.5927
Borcs7	5.26368	0.323463	0.547846	1.79022	0.877344	0.999981	5.62812	4.12559	6.30619	5.60773	3.95847	1.96615	7.882	5.90236	7.20161	6.31447	2.43445	5.83707
Borcs8	7.67022	0.269614	0.469854	1.44872	0.91891	0.999981	4.02008	10.7265	6.30619	9.61326	5.54186	5.89845	9.85249	7.58875	4.32097	9.92275	10.955	7.29633
Bpgm	3.50696	0.548777	0.707901	4.50859	0.478734	0.999981	1.60803	6.60094	3.50344	3.20442	0.791694	1.96615	3.28416	6.74555	2.88064	5.41241	6.08613	0
Bphl	14.0927	0.162443	0.355521	2.68443	0.748499	0.999981	12.0603	22.2782	9.80963	11.2155	13.4588	9.83075	8.53883	16.0207	15.8435	16.2372	13.3895	20.4297
Bpnt1	5.97273	-0.0910316	0.571837	2.48005	0.779496	0.999981	5.62812	11.5516	4.90482	4.00552	6.33355	1.96615	3.28416	3.37278	1.44032	6.31447	9.7378	13.1334
Bpnt2	12.0736	0.0139589	0.379826	8.91051	0.112687	0.999981	18.4924	14.027	11.9117	11.2155	11.8754	3.9323	17.0777	19.3935	12.9629	13.531	6.08613	4.3778
Bptf	5.63607	-0.040558	0.550232	0.892024	0.970796	0.999981	2.41205	10.7265	5.6055	4.80663	5.54186	5.89845	7.22516	4.21597	7.20161	4.51034	3.65168	5.83707
Braf	6.40657	0.312031	0.504904	3.27242	0.658066	0.999981	4.8241	3.30047	5.6055	4.80663	5.54186	9.83075	3.28416	6.74555	10.0823	6.31447	4.8689	11.6741
Brap	15.5148	-0.465313	0.346738	2.05784	0.841086	0.999981	14.4723	24.7535	18.9186	13.6188	19.7923	15.7292	15.1072	9.27514	8.64193	10.8248	21.9101	13.1334
Brat1	4.75196	0.285828	0.602712	4.40348	0.4929	0.999981	1.60803	1.65023	2.80275	9.61326	3.95847	7.8646	2.62733	5.90236	4.32097	4.51034	4.8689	7.29633
Brcc3	10.0535	0.129555	0.39984	1.29132	0.935822	0.999981	9.6482	8.25117	7.00688	13.6188	11.0837	7.8646	8.53883	10.1183	10.0823	10.8248	13.3895	10.2149
Brd1	10.1065	-0.411496	0.402765	1.89954	0.862864	0.999981	9.6482	12.3768	11.211	9.61326	8.70863	17.6954	6.56833	6.74555	10.0823	7.21654	9.7378	11.6741
Brd2	40.2054	-0.0142485	0.220521	1.49455	0.913698	0.999981	37.7888	39.6056	42.742	46.4641	35.6262	39.323	33.4985	37.1005	33.1274	46.9075	52.3407	37.9409
Brd3	8.60769	0.286342	0.43838	3.15812	0.675624	0.999981	12.0603	4.12559	6.30619	7.20994	8.70863	7.8646	10.5093	7.58875	4.32097	11.7269	9.7378	13.1334
Brd4	17.6928	-0.357385	0.316759	3.60436	0.607659	0.999981	18.4924	14.027	15.4151	18.4254	30.8761	21.6277	11.1662	15.1775	14.4032	13.531	15.8239	23.3483
Brd7	16.1034	0.343699	0.331394	4.31761	0.504651	0.999981	8.84418	8.25117	12.6124	18.4254	20.584	17.6954	16.4208	14.3343	17.2839	13.531	21.9101	23.3483
Brd8	5.79427	-0.304351	0.547134	3.86838	0.568518	0.999981	2.41205	4.12559	7.00688	6.40884	6.33355	13.7631	1.9705	6.74555	5.76129	7.21654	4.8689	2.91853
Brd9	5.12291	-0.254566	0.565089	3.09086	0.685979	0.999981	5.62812	6.60094	2.80275	5.60773	5.54186	5.89845	3.28416	8.43194	2.88064	3.60827	2.43445	8.7556
Brf1	6.03604	0.348125	0.569653	1.32817	0.932007	0.999981	2.41205	4.12559	2.80275	6.40884	7.91694	7.8646	5.9115	9.27514	12.9629	1.80414	3.65168	7.29633
Brf2	3.18594	0.310414	0.714921	2.45484	0.78328	0.999981	0.804017	2.47535	3.50344	2.40331	2.37508	5.89845	3.28416	4.21597	2.88064	0.902068	3.65168	5.83707
Bri3bp	5.76139	-0.489476	0.550971	2.01669	0.846831	0.999981	9.6482	7.42605	5.6055	4.80663	3.16678	9.83075	3.28416	5.05916	8.64193	6.31447	2.43445	2.91853
Brip1os	9.33704	-0.635199	0.464834	1.52298	0.910403	0.999981	7.23615	9.07629	15.4151	12.8177	11.8754	11.7969	13.1367	10.1183	4.32097	9.92275	4.8689	1.45927
Brix1	10.8188	-0.347	0.413568	1.29375	0.935574	0.999981	8.04017	15.6772	10.5103	12.0166	11.0837	15.7292	13.1367	10.9615	14.4032	9.02068	4.8689	4.3778
Brk1	69.9779	0.0359683	0.183129	2.57094	0.765776	0.999981	74.7736	72.6103	63.7626	60.884	71.2524	68.8153	70.2811	63.2396	47.5306	82.0882	90.0747	74.4226
Brms1	10.3383	-0.167143	0.399048	1.58243	0.903366	0.999981	8.84418	12.3768	9.80963	8.81215	18.209	7.8646	9.85249	10.1183	8.64193	8.11861	9.7378	11.6741
Brox	33.8414	0.0941724	0.235557	3.92088	0.560863	0.999981	32.1607	34.6549	44.1433	32.0442	22.9591	29.4923	28.9007	43.8461	36.0081	31.5724	27.9962	42.3187
Brpf1	10.0434	-0.0639017	0.409509	3.00521	0.699183	0.999981	11.2562	14.027	11.9117	9.61326	10.292	3.9323	7.882	14.3343	5.76129	10.8248	13.3895	7.29633
Brpf3	2.95433	-0.909734	0.766838	1.90663	0.861908	0.999981	4.02008	3.30047	2.80275	4.80663	4.75016	1.96615	1.9705	1.68639	0	0.902068	4.8689	4.3778
Brwd1	5.99212	0.393129	0.521043	1.20377	0.944516	0.999981	6.43213	4.12559	7.70757	3.20442	5.54186	3.9323	3.941	5.90236	8.64193	8.11861	8.52058	5.83707
Bscl2	27.4648	-0.0281119	0.266201	1.97122	0.853112	0.999981	29.7486	28.054	25.9255	37.6519	32.4594	11.7969	22.9892	30.355	30.2468	27.062	25.5617	27.7261
Bsdc1	10.3524	-0.384355	0.424146	5.37993	0.371292	0.999981	8.84418	10.7265	10.5103	9.61326	19.0007	9.83075	4.59783	14.3343	1.44032	11.7269	13.3895	10.2149
Bsg	84.3937	0.0954808	0.162596	1.24485	0.940503	0.999981	73.1655	88.2875	87.586	84.116	83.1279	72.7476	81.4473	86.0058	82.0984	87.5006	103.464	83.1782
Bst1	2.91389	-1.00214	0.789921	2.98323	0.702571	0.999981	3.21607	6.60094	3.50344	4.80663	2.37508	1.96615	1.9705	0.843194	5.76129	2.7062	1.21723	0
Btaf1	6.54358	0.811528	0.511358	1.28909	0.936051	0.999981	4.8241	4.12559	7.00688	7.20994	1.58339	3.9323	7.22516	5.90236	8.64193	8.11861	9.7378	10.2149
Btbd1	22.3504	0.360805	0.302121	3.55881	0.614509	0.999981	21.7085	18.9777	21.0206	12.0166	15.8339	27.5261	25.6165	18.5503	18.7242	19.8455	45.0373	23.3483
Btbd10	5.72241	0.496566	0.541629	4.51071	0.478452	0.999981	8.84418	7.42605	2.10206	2.40331	4.75016	3.9323	9.85249	6.74555	5.76129	5.41241	8.52058	2.91853
Btbd19	3.01978	0.0749725	0.730991	4.12134	0.532081	0.999981	5.62812	4.12559	2.80275	0.801105	2.37508	1.96615	6.56833	3.37278	1.44032	1.80414	2.43445	2.91853
Btbd2	8.2582	-0.455917	0.503024	2.34756	0.799256	0.999981	6.43213	9.07629	11.211	10.4144	7.12524	9.83075	9.85249	0.843194	4.32097	5.41241	15.8239	8.7556
Btbd6	4.44683	-0.314438	0.622594	1.85729	0.868518	0.999981	6.43213	4.9507	6.30619	2.40331	2.37508	7.8646	6.56833	3.37278	2.88064	6.31447	2.43445	1.45927
Btbd7	4.8141	0.604707	0.583773	4.0169	0.546985	0.999981	3.21607	1.65023	6.30619	2.40331	3.95847	5.89845	4.59783	3.37278	8.64193	3.60827	9.7378	4.3778
Btbd9	6.14087	-0.650066	0.547926	2.30448	0.805608	0.999981	6.43213	4.9507	4.90482	9.61326	9.50033	7.8646	2.62733	10.1183	2.88064	3.60827	2.43445	8.7556
Btf3	124.329	0.036773	0.155371	2.61907	0.758465	0.999981	116.582	158.422	116.314	133.784	102.92	108.138	131.367	132.381	144.032	101.032	122.94	124.038
Btf3l4	13.1041	0.136867	0.359785	7.47519	0.18763	0.999981	16.8844	14.8521	11.211	9.61326	13.4588	7.8646	22.3323	21.923	11.5226	8.11861	12.1723	7.29633
Btg2	3.15648	-0.496875	0.711274	1.0564	0.95789	0.999981	2.41205	4.9507	4.20413	3.20442	5.54186	1.96615	2.62733	1.68639	2.88064	4.51034	2.43445	1.45927
Btk	20.4225	-0.116889	0.304895	2.3825	0.794078	0.999981	17.6884	13.2019	19.6193	20.8287	32.4594	25.56	24.3028	16.8639	15.8435	20.7476	14.6067	23.3483
Btrc	4.28098	-0.491511	0.693282	5.65473	0.341277	0.999981	4.8241	4.12559	3.50344	10.4144	1.58339	3.9323	0.656833	7.58875	1.44032	7.21654	6.08613	0
Bub3	26.7731	0.0308203	0.265806	2.48182	0.77923	0.999981	32.9647	30.5293	16.1158	24.8342	26.9176	27.5261	25.6165	21.923	23.0452	36.0827	27.9962	27.7261
Bud23	10.3978	0.0824903	0.40434	1.22305	0.942647	0.999981	10.4522	10.7265	7.70757	9.61326	12.6671	7.8646	10.5093	11.8047	7.20161	12.6289	6.08613	17.5112
Bud31	36.6235	-0.104569	0.232983	3.10282	0.684138	0.999981	36.1808	49.507	29.4289	32.0442	41.1681	39.323	46.6351	37.9437	34.5677	27.9641	26.779	37.9409
Bysl	6.36049	-0.658032	0.531008	2.58838	0.76313	0.999981	10.4522	3.30047	12.6124	6.40884	6.33355	7.8646	4.59783	6.74555	7.20161	1.80414	6.08613	2.91853
Bzw2	3.81065	0.645866	0.770662	7.33843	0.196663	0.999981	1.60803	4.9507	0.700688	4.80663	0.791694	3.9323	7.22516	11.8047	7.20161	2.7062	0	0
C1d	27.8604	-0.0828638	0.258039	1.96239	0.854324	0.999981	31.3567	33.8298	26.6261	25.6353	30.0844	23.5938	19.705	32.8846	28.8064	33.3765	27.9962	20.4297
C1galt1	11.6137	0.121496	0.385153	2.58429	0.763751	0.999981	16.0803	13.2019	8.40825	12.0166	7.91694	7.8646	15.764	13.4911	10.0823	6.31447	12.1723	16.0519
C1galt1c1	7.69064	-0.059615	0.483399	1.90079	0.862695	0.999981	6.43213	5.77582	4.90482	11.2155	10.292	7.8646	7.22516	5.05916	12.9629	10.8248	2.43445	7.29633
C1qtnf12	6.79246	0.0119222	0.495397	1.06359	0.957275	0.999981	3.21607	6.60094	11.211	5.60773	7.12524	7.8646	6.56833	5.05916	4.32097	8.11861	8.52058	7.29633
C1qtnf6	4.60913	0.172689	0.600309	3.12014	0.68147	0.999981	4.8241	5.77582	4.20413	3.20442	4.75016	1.96615	5.25466	4.21597	11.5226	1.80414	4.8689	2.91853
C2cd2l	11.0988	0.285825	0.404042	1.64561	0.895679	0.999981	16.8844	9.07629	7.70757	11.2155	4.75016	11.7969	11.1662	12.6479	15.8435	12.6289	12.1723	7.29633
C330007P06Rik	10.8491	0.400841	0.393179	3.55202	0.615532	0.999981	14.4723	8.25117	8.40825	8.01105	9.50033	7.8646	16.4208	16.0207	12.9629	11.7269	12.1723	4.3778
C330018D20Rik	3.39148	0.345976	0.711781	3.76935	0.583078	0.999981	6.43213	2.47535	2.80275	3.20442	2.37508	0	4.59783	0.843194	7.20161	5.41241	2.43445	2.91853
C77080	39.8411	0.388139	0.225433	5.33874	0.375952	0.999981	38.5928	32.1796	35.7351	32.8453	42.7515	21.6277	49.9193	41.3165	47.5306	27.062	63.2957	45.2373
C87436	2.89136	-0.603811	0.751002	1.83682	0.871232	0.999981	2.41205	2.47535	3.50344	2.40331	3.95847	5.89845	1.31367	3.37278	4.32097	0.902068	1.21723	2.91853
C920009B18Rik	3.80452	-0.612095	0.644447	1.07625	0.956185	0.999981	6.43213	4.9507	3.50344	3.20442	5.54186	3.9323	3.941	2.52958	1.44032	3.60827	3.65168	2.91853
C9orf72	12.6577	0.125496	0.388508	5.00732	0.414987	0.999981	6.43213	16.5023	9.80963	11.2155	14.2505	13.7631	17.0777	26.9822	7.20161	9.92275	8.52058	10.2149
Caap1	3.77278	0.813523	0.655791	4.90382	0.42773	0.999981	2.41205	3.30047	2.80275	5.60773	2.37508	0	3.941	6.74555	5.76129	7.21654	3.65168	1.45927
Cab39	56.4255	0.397947	0.210621	1.30542	0.934373	0.999981	52.2611	44.5563	60.9598	63.2873	38.0013	33.4246	63.7128	77.5739	56.1726	55.0261	69.3819	62.7485
Cab39l	10.0081	0.0580302	0.402691	3.83468	0.573455	0.999981	4.8241	11.5516	9.80963	14.4199	11.0837	7.8646	7.882	10.1183	8.64193	14.4331	12.1723	7.29633
Cabin1	8.66353	0.129367	0.448737	4.57781	0.469541	0.999981	5.62812	4.12559	7.70757	12.0166	13.4588	5.89845	6.56833	6.74555	7.20161	5.41241	14.6067	14.5927
Cables2	3.44608	-0.671655	0.708394	3.4066	0.637565	0.999981	4.02008	0.825117	6.30619	4.00552	3.16678	7.8646	1.9705	1.68639	4.32097	4.51034	1.21723	1.45927
Cacfd1	10.812	0.697862	0.420005	2.64164	0.755029	0.999981	12.8643	5.77582	11.211	9.61326	9.50033	0	13.1367	13.4911	18.7242	13.531	7.30335	14.5927
Cacna1a	5.86697	-0.539956	0.544869	2.34043	0.800312	0.999981	8.04017	5.77582	8.40825	4.80663	6.33355	7.8646	10.5093	5.90236	1.44032	4.51034	2.43445	4.3778
Cactin	8.15718	-0.17048	0.474608	6.86169	0.231131	0.999981	10.4522	7.42605	4.90482	10.4144	4.75016	11.7969	7.882	16.8639	1.44032	5.41241	4.8689	11.6741
Cacul1	27.0874	0.170131	0.256256	1.78733	0.877719	0.999981	24.1205	24.7535	25.9255	22.4309	31.6678	23.5938	28.2438	29.5118	38.8887	21.6496	27.9962	26.2668
Cacybp	27.3391	-0.120675	0.256575	4.86404	0.432697	0.999981	21.7085	28.8791	36.4358	24.0331	34.0428	23.5938	20.3618	23.6094	33.1274	18.0414	29.2134	35.0224
Calcoco1	10.1422	-0.142236	0.418361	5.15737	0.396978	0.999981	9.6482	5.77582	10.5103	6.40884	14.2505	17.6954	7.22516	8.43194	2.88064	9.92275	15.8239	13.1334
Calcrl	7.65622	-0.267578	0.482284	4.46644	0.484386	0.999981	7.23615	5.77582	7.70757	13.6188	10.292	3.9323	1.9705	5.90236	12.9629	8.11861	8.52058	5.83707
Cald1	4.91138	-1.92219	0.675745	3.45389	0.630376	0.999981	7.23615	4.12559	6.30619	9.61326	6.33355	11.7969	3.941	2.52958	0	0	1.21723	5.83707
Calhm2	6.26505	-0.0016502	0.557982	2.25579	0.812737	0.999981	1.60803	8.25117	9.80963	4.00552	4.75016	9.83075	12.4798	5.90236	5.76129	4.51034	2.43445	5.83707
Calm2	146.089	0.123878	0.14001	6.42363	0.267152	0.999981	147.135	139.445	105.804	121.768	136.963	194.649	145.817	152.618	138.271	141.625	158.239	170.734
Calm3	80.1051	0.0515707	0.167138	0.731662	0.981186	0.999981	70.7535	71.7852	81.9805	88.9226	74.4192	86.5106	87.3588	85.1626	80.658	84.7944	73.0335	75.8819
Calu	20.9268	-0.0977481	0.297345	4.51243	0.478222	0.999981	28.1406	17.3275	30.1296	15.221	21.3757	17.6954	20.3618	27.8254	27.3661	16.2372	13.3895	16.0519
Camk1	103.923	-0.172761	0.158937	8.47626	0.131868	0.999981	116.582	146.046	100.198	96.9337	96.5866	104.206	117.573	118.047	106.584	98.3254	65.7302	80.2597
Camk1d	5.27814	-0.50209	0.5712	0.813422	0.976169	0.999981	7.23615	5.77582	7.00688	5.60773	4.75016	5.89845	5.25466	5.05916	0	3.60827	7.30335	5.83707
Camk2g	7.86245	-0.383195	0.462998	1.32313	0.932534	0.999981	9.6482	7.42605	7.70757	10.4144	11.8754	5.89845	4.59783	8.43194	10.0823	9.02068	4.8689	4.3778
Camk2n2	3.04598	0.760727	0.738104	2.09723	0.835534	0.999981	4.02008	2.47535	4.20413	2.40331	0.791694	0	4.59783	5.90236	2.88064	2.7062	3.65168	2.91853
Camkk2	10.4552	0.227005	0.422682	1.7906	0.877294	0.999981	8.04017	9.07629	5.6055	13.6188	13.4588	5.89845	9.19566	7.58875	12.9629	10.8248	7.30335	21.889
Caml	12.9678	0.0140315	0.370225	1.07928	0.955921	0.999981	20.1004	12.3768	12.6124	10.4144	9.50033	11.7969	9.19566	12.6479	15.8435	15.3352	9.7378	16.0519
Camsap1	4.3896	0.256672	0.607187	2.88131	0.718278	0.999981	7.23615	3.30047	4.20413	4.80663	2.37508	1.96615	8.53883	4.21597	4.32097	2.7062	6.08613	2.91853
Camsap2	7.52419	-0.45211	0.511318	2.65639	0.75278	0.999981	9.6482	6.60094	8.40825	4.80663	8.70863	13.7631	13.7935	8.43194	1.44032	8.11861	3.65168	2.91853
Camta1	3.8236	0.050216	0.648943	2.82433	0.727047	0.999981	6.43213	4.12559	2.10206	1.60221	7.12524	1.96615	5.25466	4.21597	2.88064	3.60827	3.65168	2.91853
Camta2	17.291	-0.197423	0.331868	2.48695	0.778459	0.999981	24.1205	15.6772	16.1158	15.221	20.584	15.7292	15.1072	12.6479	12.9629	18.9434	9.7378	30.6446
Cand1	17.2633	-0.287207	0.316725	6.36456	0.272343	0.999981	19.2964	24.7535	14.7144	22.4309	20.584	11.7969	16.4208	16.0207	12.9629	21.6496	20.6928	5.83707
Cant1	21.3922	0.437403	0.28922	4.16522	0.525883	0.999981	19.2964	9.90141	16.8165	20.8287	26.1259	15.7292	24.9597	18.5503	21.6048	22.5517	26.779	33.5631
Cap1	127.646	0.364696	0.18349	2.03128	0.8448	0.999981	100.502	88.2875	126.825	93.7292	149.63	112.071	193.766	161.893	99.3822	138.016	129.026	138.63
Capg	478.381	0.0627337	0.102344	3.45353	0.63043	0.999981	418.089	431.536	479.971	476.657	491.642	511.199	455.185	447.736	485.389	487.117	530.71	525.336
Capn1	23.4425	-0.0455994	0.288032	3.45491	0.630221	0.999981	17.6884	24.7535	22.422	25.6353	28.501	19.6615	20.3618	16.8639	14.4032	24.3558	24.3445	42.3187
Capn15	3.57216	-0.61893	0.681931	1.20197	0.944689	0.999981	6.43213	4.9507	4.20413	3.20442	3.95847	1.96615	3.28416	1.68639	4.32097	1.80414	1.21723	5.83707
Capn2	46.8826	0.113261	0.202661	3.90337	0.563411	0.999981	52.2611	47.8568	48.3475	44.8619	49.085	27.5261	58.4581	51.4348	43.2097	47.8096	52.3407	39.4002
Capn5	13.9017	-0.10993	0.351915	4.87324	0.431545	0.999981	14.4723	10.7265	16.8165	20.0276	15.0422	7.8646	13.1367	7.58875	17.2839	20.7476	8.52058	14.5927
Capn7	11.6195	0.0971538	0.378238	0.886258	0.971209	0.999981	9.6482	10.7265	13.3131	8.81215	12.6671	11.7969	9.19566	10.9615	12.9629	16.2372	8.52058	14.5927
Capns1	158.213	0.0820213	0.137949	2.26394	0.811548	0.999981	145.527	150.996	147.144	148.204	162.297	169.089	164.208	164.423	139.711	162.372	204.494	140.09
Caprin1	73.6502	-0.0613242	0.176053	4.38193	0.495834	0.999981	78.7936	66.0094	86.1846	74.5027	69.6691	76.6799	78.1631	64.0828	92.1806	83.8923	66.9474	46.6965
Capza1	58.071	0.0827191	0.19847	1.80131	0.875897	0.999981	50.6531	43.7312	61.6605	66.4917	64.9189	51.1199	53.8603	69.9851	51.8516	51.4179	74.2508	56.9114
Capza1-ps1	6.67651	-0.179785	0.49412	2.41183	0.789711	0.999981	5.62812	9.90141	7.00688	4.80663	5.54186	9.83075	7.882	8.43194	2.88064	3.60827	7.30335	7.29633
Capza2	131.849	-0.287098	0.154135	7.37644	0.194115	0.999981	131.055	123.768	142.24	181.851	134.588	149.427	97.2113	94.4377	93.6209	130.8	155.805	147.386
Capzb	150.373	0.00791285	0.145334	2.44665	0.784508	0.999981	187.336	160.898	140.838	152.21	148.838	108.138	151.072	159.364	136.831	159.666	138.764	160.519
Car13	7.68793	0.441347	0.466041	0.657856	0.985201	0.999981	5.62812	4.9507	9.10894	7.20994	4.75016	7.8646	7.882	7.58875	5.76129	10.8248	13.3895	7.29633
Car9	3.92069	0.392167	0.632058	0.756438	0.979728	0.999981	3.21607	3.30047	3.50344	2.40331	2.37508	5.89845	2.62733	5.05916	4.32097	6.31447	3.65168	4.3778
Card19	56.9388	-0.00305259	0.19169	7.30507	0.198923	0.999981	65.9294	58.5833	56.055	40.8563	52.2518	66.8491	62.3991	73.3579	47.5306	45.1034	41.3857	72.9633
Card9	4.44394	-0.0549551	0.601284	1.52293	0.910408	0.999981	3.21607	3.30047	4.90482	4.00552	3.95847	7.8646	3.941	6.74555	2.88064	1.80414	4.8689	5.83707
Carhsp1	22.9746	-0.539094	0.278593	6.39895	0.269311	0.999981	28.9446	26.4037	21.7213	35.2486	33.2511	17.6954	21.6755	21.923	11.5226	26.16	19.4756	11.6741
Carm1	6.15527	0.0611802	0.522379	1.17582	0.947176	0.999981	6.43213	8.25117	4.90482	3.20442	3.95847	9.83075	5.25466	3.37278	8.64193	5.41241	7.30335	7.29633
Carnmt1	10.4778	0.0549727	0.406019	2.14129	0.829269	0.999981	13.6683	10.7265	7.00688	8.81215	12.6671	7.8646	14.4503	14.3343	10.0823	8.11861	4.8689	13.1334
Cars	10.3336	-0.0515226	0.412869	2.18604	0.82285	0.999981	10.4522	10.7265	10.5103	7.20994	11.0837	11.7969	11.823	14.3343	4.32097	10.8248	4.8689	16.0519
Cars2	5.30521	-0.239906	0.559466	2.20714	0.819803	0.999981	6.43213	4.12559	3.50344	7.20994	4.75016	7.8646	3.941	7.58875	4.32097	5.41241	1.21723	7.29633
Casc3	7.31065	-0.164649	0.468518	0.526709	0.991113	0.999981	8.04017	6.60094	11.211	7.20994	9.50033	3.9323	7.22516	6.74555	5.76129	8.11861	6.08613	7.29633
Casd1	6.59464	-0.238964	0.495296	1.61055	0.899971	0.999981	6.43213	6.60094	6.30619	5.60773	10.292	7.8646	6.56833	8.43194	7.20161	3.60827	7.30335	2.91853
Cask	4.55588	0.302966	0.600891	0.545332	0.990369	0.999981	3.21607	4.12559	2.80275	5.60773	3.16678	5.89845	5.25466	4.21597	8.64193	5.41241	4.8689	1.45927
Casp2	5.43471	-0.0560454	0.558404	1.98072	0.851806	0.999981	7.23615	2.47535	5.6055	3.20442	9.50033	5.89845	5.9115	8.43194	2.88064	3.60827	6.08613	4.3778
Casp3	9.36161	0.388434	0.422225	3.90761	0.562793	0.999981	6.43213	3.30047	6.30619	10.4144	13.4588	9.83075	8.53883	8.43194	10.0823	9.02068	13.3895	13.1334
Casp6	7.29177	-0.308351	0.491194	3.72177	0.590128	0.999981	6.43213	5.77582	6.30619	5.60773	12.6671	11.7969	9.19566	3.37278	10.0823	3.60827	9.7378	2.91853
Casp7	9.81897	0.290403	0.42607	3.17711	0.672702	0.999981	8.04017	7.42605	13.3131	13.6188	11.0837	0	11.1662	10.1183	14.4032	9.92275	8.52058	10.2149
Casp8	16.5984	-0.119627	0.329253	4.21136	0.519404	0.999981	13.6683	12.3768	21.0206	14.4199	26.9176	15.7292	8.53883	16.8639	18.7242	20.7476	17.0412	13.1334
Casp9	14.3585	-0.0834681	0.344634	3.6737	0.597282	0.999981	15.2763	6.60094	16.1158	12.8177	16.6256	23.5938	16.4208	10.9615	12.9629	11.7269	14.6067	14.5927
Cast	25.5992	-0.0260086	0.262915	5.22091	0.389519	0.999981	19.2964	33.0047	19.6193	32.8453	26.9176	23.5938	22.3323	25.2958	20.1645	37.8868	24.3445	21.889
Castor2	6.27895	-0.166718	0.513217	2.04227	0.843266	0.999981	8.84418	4.9507	9.80963	3.20442	7.12524	5.89845	7.882	3.37278	4.32097	6.31447	4.8689	8.7556
Cat	147.411	0.164625	0.179899	6.3635	0.272438	0.999981	127.839	151.822	196.193	100.138	108.462	147.461	111.662	109.615	180.04	158.764	210.58	166.356
Cav2	32.4098	-0.308589	0.243408	4.92217	0.425453	0.999981	45.829	41.2559	37.1365	21.6298	30.0844	41.2892	32.1848	36.2573	24.4855	22.5517	32.8651	23.3483
Cavin1	3.78132	-0.361799	0.64654	2.4659	0.781621	0.999981	6.43213	4.12559	2.80275	3.20442	4.75016	3.9323	5.25466	5.05916	1.44032	1.80414	3.65168	2.91853
Cbfa2t2	4.79301	0.0494987	0.5756	4.01657	0.547033	0.999981	5.62812	4.9507	8.40825	2.40331	4.75016	1.96615	5.25466	5.90236	7.20161	1.80414	4.8689	4.3778
Cbfb	28.5311	-0.648495	0.259656	5.43717	0.364885	0.999981	36.1808	46.2066	32.9323	30.442	28.501	33.4246	32.8416	26.139	23.0452	17.1393	12.1723	23.3483
Cbl	15.2608	-0.103636	0.356462	2.46306	0.782048	0.999981	9.6482	18.1526	18.2179	14.4199	12.6671	21.6277	16.4208	14.3343	4.32097	18.0414	13.3895	21.889
Cblb	19.0206	0.0938299	0.324242	8.56025	0.127943	0.999981	8.84418	22.2782	25.9255	24.8342	18.209	9.83075	13.1367	18.5503	11.5226	37.8868	18.2584	18.9705
Cbll1	7.3211	-0.22471	0.484022	2.8342	0.72553	0.999981	9.6482	4.12559	4.90482	9.61326	4.75016	15.7292	5.25466	7.58875	7.20161	5.41241	4.8689	8.7556
Cbr1	16.6366	-0.0658808	0.314338	0.681454	0.983971	0.999981	20.1004	17.3275	17.5172	15.221	15.8339	15.7292	18.3913	13.4911	17.2839	14.4331	18.2584	16.0519
Cbr2	2.96035	-0.179322	0.79717	8.86616	0.114523	0.999981	3.21607	12.3768	2.80275	1.60221	0.791694	0	4.59783	4.21597	1.44032	1.80414	1.21723	1.45927
Cbr3	10.3312	-0.0359939	0.396663	3.20371	0.668613	0.999981	10.4522	9.90141	9.10894	11.2155	13.4588	7.8646	8.53883	8.43194	10.0823	10.8248	18.2584	5.83707
Cbr4	5.18457	-0.454643	0.588481	0.972021	0.964791	0.999981	5.62812	4.12559	4.20413	8.01105	4.75016	9.83075	5.9115	5.05916	2.88064	4.51034	7.30335	0
Cbx1	10.3357	-0.0343185	0.409623	0.701709	0.982875	0.999981	13.6683	8.25117	7.70757	11.2155	13.4588	7.8646	11.1662	10.1183	15.8435	7.21654	7.30335	10.2149
Cbx3	28.0923	0.02241	0.254631	0.967096	0.965176	0.999981	35.3767	23.9284	32.9323	27.2376	24.5425	23.5938	26.9302	32.0414	27.3661	31.5724	26.779	24.8075
Cbx4	5.54987	-0.248809	0.57439	7.26589	0.201605	0.999981	6.43213	0.825117	4.20413	7.20994	7.12524	9.83075	5.25466	3.37278	0	3.60827	8.52058	10.2149
Cbx5	6.07675	0.718758	0.53893	6.48472	0.261867	0.999981	8.84418	5.77582	7.70757	2.40331	1.58339	1.96615	7.882	6.74555	12.9629	9.02068	3.65168	4.3778
Cbx6	5.51274	-0.134431	0.582234	1.10577	0.953592	0.999981	8.84418	4.12559	4.90482	3.20442	7.12524	5.89845	5.9115	5.90236	8.64193	7.21654	0	4.3778
Cby1	3.56824	-0.174767	0.718782	1.49027	0.914189	0.999981	1.60803	4.9507	4.90482	4.80663	6.33355	0	7.22516	1.68639	1.44032	4.51034	2.43445	2.91853
Cc2d1a	9.00036	-0.204474	0.45474	1.49631	0.913495	0.999981	8.84418	8.25117	3.50344	12.0166	11.0837	15.7292	8.53883	6.74555	10.0823	8.11861	12.1723	2.91853
Cc2d1b	13.4597	0.234506	0.352494	0.753497	0.979904	0.999981	10.4522	14.027	11.9117	13.6188	10.292	13.7631	13.7935	10.1183	12.9629	18.9434	17.0412	14.5927
Ccar1	10.924	-0.0314752	0.398508	1.58743	0.902765	0.999981	16.0803	12.3768	7.70757	11.2155	9.50033	7.8646	10.5093	6.74555	10.0823	14.4331	8.52058	16.0519
Ccar2	5.8169	0.00432876	0.531726	0.695737	0.983202	0.999981	5.62812	5.77582	6.30619	7.20994	4.75016	3.9323	7.882	6.74555	2.88064	3.60827	4.8689	10.2149
Ccdc107	13.3884	-0.156151	0.368378	5.56607	0.350755	0.999981	14.4723	13.2019	8.40825	15.221	11.0837	21.6277	13.7935	23.6094	8.64193	9.92275	6.08613	14.5927
Ccdc115	21.5892	0.252244	0.307763	5.4887	0.359186	0.999981	35.3767	20.6279	24.5241	17.6243	11.0837	9.83075	19.0482	28.6686	30.2468	21.6496	17.0412	23.3483
Ccdc117	6.56185	-0.393683	0.512112	3.48846	0.625134	0.999981	4.8241	5.77582	4.90482	6.40884	13.4588	9.83075	3.28416	6.74555	2.88064	9.92275	4.8689	5.83707
Ccdc12	33.4227	-0.222493	0.237061	1.11404	0.952853	0.999981	30.5526	34.6549	28.7282	45.663	41.1681	35.3907	29.5575	31.1982	31.6871	30.6703	26.779	35.0224
Ccdc124	23.7211	0.109236	0.277251	1.03305	0.959857	0.999981	21.7085	25.5786	16.8165	24.8342	19.7923	29.4923	28.2438	27.8254	28.8064	21.6496	19.4756	20.4297
Ccdc127	10.1069	-0.00686886	0.423652	2.55894	0.767594	0.999981	14.4723	9.07629	5.6055	8.01105	13.4588	9.83075	9.19566	5.05916	14.4032	11.7269	14.6067	5.83707
Ccdc130	5.04589	-0.0719931	0.555093	1.97768	0.852225	0.999981	4.8241	5.77582	6.30619	3.20442	6.33355	3.9323	3.28416	5.05916	7.20161	2.7062	6.08613	5.83707
Ccdc167	3.50025	-0.224275	0.688212	1.32375	0.932469	0.999981	3.21607	5.77582	2.80275	3.20442	1.58339	5.89845	3.28416	2.52958	1.44032	1.80414	6.08613	4.3778
Ccdc174	4.51052	-0.315525	0.61368	3.52932	0.618957	0.999981	7.23615	4.12559	2.10206	5.60773	6.33355	3.9323	6.56833	4.21597	2.88064	0.902068	7.30335	2.91853
Ccdc186	5.26665	-0.526903	0.558103	2.11735	0.832681	0.999981	4.02008	5.77582	5.6055	7.20994	8.70863	5.89845	2.62733	7.58875	2.88064	6.31447	3.65168	2.91853
Ccdc22	9.24319	0.329942	0.431533	1.07877	0.955965	0.999981	5.62812	6.60094	12.6124	9.61326	8.70863	5.89845	9.19566	16.0207	8.64193	9.02068	7.30335	11.6741
Ccdc25	7.81104	0.00697226	0.475028	6.83552	0.233163	0.999981	2.41205	4.9507	11.9117	13.6188	8.70863	5.89845	3.941	5.90236	4.32097	9.92275	13.3895	8.7556
Ccdc28a	4.46907	0.145449	0.617886	2.50234	0.776142	0.999981	4.8241	6.60094	3.50344	5.60773	3.95847	0	2.62733	5.90236	2.88064	3.60827	9.7378	4.3778
Ccdc28b	3.19543	-1.48356	0.827183	4.71654	0.451444	0.999981	1.60803	2.47535	4.20413	5.60773	5.54186	5.89845	1.9705	0.843194	1.44032	0	0	8.7556
Ccdc32	10.9377	-0.0187829	0.389044	2.91544	0.713021	0.999981	6.43213	10.7265	14.0138	9.61326	14.2505	11.7969	7.882	15.1775	14.4032	9.92275	9.7378	7.29633
Ccdc34	4.09299	0.123778	0.733672	1.76275	0.880902	0.999981	4.8241	4.12559	2.80275	4.00552	0	7.8646	4.59783	7.58875	5.76129	0	6.08613	1.45927
Ccdc43	5.43969	0.174409	0.583796	1.80678	0.875182	0.999981	4.02008	7.42605	3.50344	2.40331	9.50033	3.9323	5.9115	5.05916	4.32097	12.6289	3.65168	2.91853
Ccdc47	17.7506	-0.241915	0.308129	2.08839	0.836784	0.999981	20.9044	26.4037	19.6193	13.6188	19.0007	15.7292	16.4208	16.8639	18.7242	12.6289	17.0412	16.0519
Ccdc50	16.2687	-0.217373	0.320033	3.1818	0.671981	0.999981	22.5125	19.8028	15.4151	12.0166	14.2505	21.6277	18.3913	17.7071	12.9629	13.531	10.955	16.0519
Ccdc51	3.72418	0.999349	0.693902	1.25682	0.939312	0.999981	0.804017	3.30047	3.50344	0.801105	3.16678	3.9323	4.59783	3.37278	8.64193	7.21654	2.43445	2.91853
Ccdc58	5.69808	-0.3218	0.543821	2.56952	0.76599	0.999981	6.43213	7.42605	7.00688	4.00552	4.75016	7.8646	3.28416	7.58875	10.0823	3.60827	4.8689	1.45927
Ccdc59	16.5436	-0.0250872	0.320694	2.44742	0.784393	0.999981	13.6683	19.8028	14.0138	16.0221	17.4173	17.6954	13.7935	14.3343	10.0823	19.8455	17.0412	24.8075
Ccdc6	9.43008	-0.499514	0.425919	3.32252	0.650396	0.999981	9.6482	7.42605	8.40825	12.8177	11.8754	15.7292	5.9115	6.74555	7.20161	13.531	3.65168	10.2149
Ccdc61	3.56325	0.700799	0.745102	3.23864	0.663248	0.999981	5.62812	2.47535	0	1.60221	5.54186	1.96615	3.28416	9.27514	2.88064	4.51034	1.21723	4.3778
Ccdc71	8.866	0.00539513	0.440963	1.28356	0.936614	0.999981	9.6482	8.25117	11.211	5.60773	9.50033	7.8646	7.882	5.90236	4.32097	9.92275	14.6067	11.6741
Ccdc71l	16.7531	-0.0326733	0.325717	5.55699	0.351737	0.999981	23.3165	20.6279	21.0206	12.8177	15.8339	7.8646	15.1072	25.2958	18.7242	18.0414	12.1723	10.2149
Ccdc82	7.70557	0.556902	0.470957	4.92584	0.424998	0.999981	3.21607	3.30047	9.10894	4.80663	9.50033	7.8646	6.56833	10.1183	12.9629	3.60827	9.7378	11.6741
Ccdc85b	11.4352	-0.282861	0.394767	0.818029	0.975869	0.999981	15.2763	11.5516	7.00688	12.8177	12.6671	15.7292	9.85249	10.1183	14.4032	5.41241	12.1723	10.2149
Ccdc86	20.8232	-0.161206	0.292303	7.65707	0.176175	0.999981	10.4522	18.1526	28.0275	24.8342	34.8345	17.6954	14.4503	15.1775	21.6048	22.5517	23.1273	18.9705
Ccdc88b	11.4079	-0.397353	0.381817	7.42761	0.190731	0.999981	7.23615	12.3768	14.0138	21.6298	15.0422	7.8646	6.56833	9.27514	8.64193	16.2372	12.1723	5.83707
Ccdc9	7.82771	0.0811165	0.44755	0.350299	0.996589	0.999981	7.23615	6.60094	9.80963	8.81215	5.54186	7.8646	7.882	7.58875	7.20161	8.11861	8.52058	8.7556
Ccdc90b	9.85954	0.137453	0.403321	1.8691	0.866945	0.999981	11.2562	7.42605	9.80963	7.20994	11.0837	9.83075	13.1367	6.74555	11.5226	10.8248	12.1723	7.29633
Ccdc91	6.38296	0.0863982	0.507464	1.1852	0.946289	0.999981	3.21607	9.07629	8.40825	4.80663	6.33355	5.89845	5.25466	5.90236	4.32097	9.02068	8.52058	5.83707
Ccdc93	8.43445	-0.147191	0.445833	1.61423	0.899523	0.999981	9.6482	11.5516	10.5103	4.00552	9.50033	7.8646	4.59783	9.27514	10.0823	8.11861	7.30335	8.7556
Ccl12	9.14606	-2.47259	0.532649	8.2903	0.140946	0.999981	5.62812	11.5516	16.1158	30.442	15.8339	13.7631	1.31367	2.52958	2.88064	3.60827	6.08613	0
Ccl3	28.0743	0.0624831	0.30845	3.60123	0.608129	0.999981	14.4723	40.4307	37.8371	17.6243	36.4179	19.6615	24.9597	28.6686	11.5226	31.5724	32.8651	40.8595
Ccl9	70.9441	-0.917194	0.187312	3.01908	0.697045	0.999981	78.7936	92.4131	77.0757	112.155	102.92	90.4429	45.3215	49.7485	41.7693	38.7889	54.7751	67.1263
Ccm2	17.6949	-0.358306	0.321464	6.54937	0.256367	0.999981	14.4723	18.1526	14.0138	24.0331	19.7923	27.5261	9.19566	8.43194	14.4032	24.3558	21.9101	16.0519
Ccn1	4.27114	-1.73083	0.704864	8.63936	0.124343	0.999981	11.2562	3.30047	1.40138	6.40884	6.33355	9.83075	4.59783	2.52958	0	0	1.21723	4.3778
Ccnc	8.11036	0.413508	0.472505	3.83851	0.572893	0.999981	3.21607	8.25117	11.9117	6.40884	3.95847	7.8646	11.823	10.9615	8.64193	3.60827	6.08613	14.5927
Ccnd2	15.2478	-1.73668	0.363857	2.09349	0.836064	0.999981	21.7085	20.6279	25.9255	28.8398	21.3757	21.6277	7.22516	4.21597	5.76129	10.8248	6.08613	8.7556
Ccnd3	21.1254	-0.505289	0.288636	2.17593	0.824305	0.999981	31.3567	21.453	22.422	26.4365	24.5425	21.6277	21.6755	16.8639	10.0823	17.1393	19.4756	20.4297
Ccndbp1	16.5019	0.263725	0.316499	1.40576	0.923682	0.999981	16.8844	15.6772	12.6124	18.4254	11.0837	15.7292	19.0482	20.2367	18.7242	18.9434	14.6067	16.0519
Ccng1	88.7348	-0.106638	0.167775	2.56067	0.767331	0.999981	103.718	100.664	77.7764	96.9337	102.92	66.8491	87.3588	78.4171	69.1355	89.3047	92.5091	99.2301
Ccng2	9.35056	-0.239142	0.427523	3.20792	0.667966	0.999981	8.84418	8.25117	9.10894	9.61326	7.91694	15.7292	6.56833	5.05916	10.0823	4.51034	13.3895	13.1334
Ccnh	7.48552	0.54285	0.468059	4.45761	0.485575	0.999981	8.04017	5.77582	9.10894	4.00552	7.91694	1.96615	9.85249	12.6479	10.0823	6.31447	9.7378	4.3778
Ccni	48.5881	0.101349	0.198446	8.61623	0.125386	0.999981	41.0049	37.9554	37.8371	44.8619	65.7106	53.0861	45.3215	38.7869	43.2097	45.1034	64.513	65.667
Ccnk	11.7975	0.619965	0.3915	2.35882	0.79759	0.999981	7.23615	5.77582	7.00688	12.0166	16.6256	7.8646	15.1072	16.8639	8.64193	13.531	13.3895	17.5112
Ccnl1	12.5583	-0.738652	0.379774	1.4575	0.917922	0.999981	10.4522	15.6772	11.211	22.4309	19.0007	15.7292	11.1662	9.27514	7.20161	8.11861	7.30335	13.1334
Ccnl2	14.525	-0.269568	0.341281	1.34459	0.930277	0.999981	15.2763	14.027	16.1158	18.4254	17.4173	13.7631	13.1367	15.1775	8.64193	12.6289	19.4756	10.2149
Ccnq	6.3056	-0.211876	0.553277	6.00176	0.306047	0.999981	8.04017	5.77582	4.90482	16.8232	6.33355	0	8.53883	6.74555	8.64193	4.51034	2.43445	2.91853
Ccnt1	5.7689	-0.184927	0.538682	1.44523	0.919302	0.999981	6.43213	4.9507	5.6055	7.20994	3.16678	9.83075	6.56833	7.58875	1.44032	4.51034	6.08613	5.83707
Ccnt2	6.23039	-0.502092	0.526446	2.60192	0.761074	0.999981	6.43213	7.42605	4.90482	10.4144	10.292	3.9323	10.5093	4.21597	2.88064	4.51034	4.8689	4.3778
Ccny	33.7954	0.127787	0.244532	2.09825	0.83539	0.999981	35.3767	42.081	29.4289	34.4475	26.9176	23.5938	46.6351	28.6686	40.329	30.6703	27.9962	39.4002
Ccnyl1	2.89103	-1.13735	0.833274	2.35854	0.797632	0.999981	4.02008	3.30047	3.50344	7.20994	4.75016	0	2.62733	0.843194	5.76129	0	1.21723	1.45927
Ccs	12.7303	-0.390484	0.37113	0.303885	0.997569	0.999981	9.6482	13.2019	12.6124	16.0221	18.209	17.6954	13.1367	10.9615	12.9629	8.11861	8.52058	11.6741
Ccser2	3.16335	0.128779	0.718848	2.31997	0.803329	0.999981	3.21607	1.65023	2.80275	3.20442	1.58339	5.89845	6.56833	4.21597	2.88064	1.80414	1.21723	2.91853
Cct3	40.2214	0.169729	0.224194	7.41536	0.191536	0.999981	36.9848	46.2066	39.9392	41.6574	27.7093	33.4246	59.115	47.2189	36.0081	55.0261	24.3445	35.0224
Cct4	61.3758	0.153309	0.184187	1.51768	0.91102	0.999981	69.1454	66.0094	58.8578	48.8674	56.2103	49.1538	71.5948	62.3964	57.6129	64.0468	66.9474	65.667
Cct5	55.7502	0.0147771	0.19487	3.50855	0.622094	0.999981	58.6932	63.534	60.2592	50.4696	49.8767	49.1538	65.6833	73.3579	41.7693	58.6344	45.0373	52.5336
Cct6a	51.5328	-0.118431	0.204439	7.1288	0.211236	0.999981	69.9495	68.4847	62.3612	41.6574	38.0013	43.2553	47.9488	66.6123	47.5306	49.6137	45.0373	37.9409
Cct7	55.4439	0.0874127	0.197079	2.97277	0.704183	0.999981	53.8691	55.2828	45.5447	45.663	45.1265	82.5783	61.7423	64.0828	51.8516	55.9282	51.1235	52.5336
Cct8	56.8058	-0.116326	0.189135	6.62085	0.250399	0.999981	69.9495	79.2112	53.2523	60.0828	46.7099	45.2215	58.4581	65.7691	60.4935	53.222	42.6029	46.6965
Ccz1	21.4673	0.174737	0.2944	0.390655	0.995583	0.999981	19.2964	18.1526	21.0206	24.0331	22.9591	13.7631	26.2733	24.4526	15.8435	18.0414	23.1273	30.6446
Cd109	4.7873	0.630837	0.604995	1.74034	0.883779	0.999981	7.23615	3.30047	4.20413	3.20442	3.95847	0	7.22516	7.58875	2.88064	8.11861	2.43445	7.29633
Cd151	27.7985	-0.428353	0.258913	5.1873	0.393452	0.999981	23.3165	33.0047	40.6399	24.8342	36.4179	31.4584	19.705	16.0207	34.5677	19.8455	23.1273	30.6446
Cd164	47.3254	-0.173272	0.207795	4.86726	0.432294	0.999981	61.1053	47.8568	32.9323	52.0718	40.3764	68.8153	44.6646	40.4733	37.4484	42.3972	48.689	51.0743
Cd180	11.744	0.499302	0.382546	1.78031	0.87863	0.999981	5.62812	10.7265	9.80963	10.4144	15.0422	7.8646	15.1072	12.6479	14.4032	17.1393	13.3895	8.7556
Cd200	4.43148	0.457539	0.612271	4.80399	0.440267	0.999981	1.60803	4.12559	5.6055	7.20994	0.791694	3.9323	3.941	5.05916	5.76129	5.41241	2.43445	7.29633
Cd200r1	25.4695	0.0239144	0.260438	0.462624	0.993428	0.999981	26.5326	23.9284	28.0275	22.4309	24.5425	25.56	25.6165	25.2958	21.6048	23.4538	27.9962	30.6446
Cd200r4	37.3463	0.29044	0.228988	2.61504	0.759078	0.999981	27.3366	32.1796	31.531	43.2597	43.5432	23.5938	37.4395	38.7869	47.5306	36.0827	47.4718	39.4002
Cd24a	3.91696	2.40811	0.759892	4.18393	0.52325	0.999981	0.804017	1.65023	3.50344	1.60221	0	0	3.28416	8.43194	7.20161	8.11861	3.65168	8.7556
Cd28	28.0694	0.496681	0.280359	7.83207	0.165736	0.999981	20.1004	29.7042	18.9186	18.4254	30.0844	15.7292	16.4208	26.9822	23.0452	31.5724	54.7751	51.0743
Cd2ap	7.54059	0.495756	0.484825	1.9935	0.850044	0.999981	4.02008	3.30047	9.80963	10.4144	6.33355	3.9323	7.882	10.1183	12.9629	5.41241	6.08613	10.2149
Cd2bp2	13.982	0.0177234	0.347475	2.85728	0.721977	0.999981	12.0603	18.9777	11.9117	14.4199	17.4173	7.8646	9.19566	18.5503	15.8435	16.2372	12.1723	13.1334
Cd300c2	71.0091	-0.248382	0.176696	1.68073	0.891318	0.999981	69.1454	83.3368	72.8715	63.2873	87.878	86.5106	63.056	54.8076	69.1355	63.1447	64.513	74.4226
Cd300lb	30.4651	-0.107611	0.25415	8.77411	0.11842	0.999981	25.7285	18.1526	35.0344	32.0442	33.2511	45.2215	18.3913	21.0799	43.2097	24.3558	41.3857	27.7261
Cd300ld	111.382	-0.299838	0.158296	8.68439	0.122334	0.999981	124.623	151.822	88.2867	104.144	164.672	104.206	91.2998	103.713	77.7774	95.6192	110.768	119.66
Cd300ld4	4.92353	-1.12536	0.635468	2.22087	0.817816	0.999981	4.8241	10.7265	4.90482	3.20442	6.33355	9.83075	0.656833	1.68639	5.76129	3.60827	6.08613	1.45927
Cd300lf	22.5595	-0.594592	0.302839	2.84009	0.724623	0.999981	19.2964	15.6772	30.8303	38.453	30.0844	31.4584	17.0777	21.0799	11.5226	21.6496	21.9101	11.6741
Cd302	20.7422	-0.745472	0.300959	2.60541	0.760544	0.999981	24.1205	22.2782	25.2248	36.0497	30.0844	17.6954	16.4208	16.0207	7.20161	18.0414	18.2584	17.5112
[truncated: 15,219 more rows]
